# Supplementary material for: Chemoproteomic profiling by a bioorthogonal probe reveals cell growth inhibition by histone H4 dopaminylation
Source: Research Square preprint supplement (doi:10.21203/rs.3.rs-4710338/v1), 2024-07-16
Supplement: Supplementary file 1 [file 523502b670564d03867dd85e.xlsx]

## Sheet: Q-containing peptides
Modified Peptides	Entry	Gene Symbol	Description
VLVVDQLSMR	P61764	STXBP1	syntaxin-binding protein 1
VLQQFADNDVSR	P51659	HSD17B4	peroxisomal multifunctional enzyme type 2
VIEEQLEPAVEK	P42704	LPPRC	leucine-rich PPR motif-containing protein, mitochondrial
IANLQTDLSDGLR	P21333	FLNA	filamin-A
FMEQVIFK	P61158	ACTR3	actin-related protein 3
FHLISPLIQK	O43847	NRDC	nardilysin
DYTQMNELQR	P07203	GPX1	glutathione peroxidase 1
DNIQGITKPAIR	P62805	H4	histone H4
ALTSEIALLQSR	P04843	RPN1	dolichyl-diphosphooligosaccharide--protein glycosyltransferase subunit 1
YWTLTATGGVQSTASSK	Q16658	FSCN1	fascin
YVQLPADEVDTQLLQDAAR	Q9Y333	LSM2	U6 snRNA-associated Sm-like protein LSm2
YVQELAAVR	Q14980	NUMA1	nuclear mitotic apparatus protein 1
YVIHTVGPIAYGEPSASQAAELR	Q9BQ69	MACD1	O-acetyl-ADP-ribose deacetylase MACROD1
YVDLGGSYVGPTQNR	P27338	MAOB	Amine oxidase [flavin-containing] B
YVALVQEK	P53618	COPB	coatomer subunit beta
YTQGGLENLELSR	Q15006	EMC2	ER membrane protein complex subunit 2
YTPVQQGPVGVNVTYGGDPIPK	P21333	FLNA	filamin-A
YTPSGQAGAAASESLFVSNHAY	P04075	ALDOA	fructose-bisphosphate aldolase A
YTISQEAYDQR	Q99426	TBCB	tubulin-folding cofactor B
YTIGLGQAK	Q01581	HMGCS1	Hydroxymethylglutaryl-CoA synthase, cytoplasmic
YSVQTADHR	Q16658	FSCN1	fascin
YSVQLLTPANLLAK	Q9Y265	RUVB1	ruvB-like 1
YSQYQQAIYK	O14744	ANM5	protein arginine N-methyltransferase 5
YSQTGNYELAVALSR	P39656	OST48	dolichyl-diphosphooligosaccharide--protein glycosyltransferase 48 kDa subunit
YSQFINFPIYVWSSK	P14625	ENPL	endoplasmin
YSNDLYELQASR	P51610	HCFC1	Host cell factor 1
YSLQYYMGLAEELVR	P11498	PC	Pyruvate carboxylase, mitochondrial
YSLLPFWYTLLYQAHR	Q14697	GANAB	neutral alpha-glucosidase AB
YSHLQPGDHLTDITLK	Q15046	KARS1	Lysine--tRNA ligase
YSGDQILIR	Q9UGP8	SEC63	translocation protein SEC63 homolog
YSFLQFDPAPR	P67775	PP2AA	serine/threonine-protein phosphatase 2A catalytic subunit alpha isoform
YQWGIMK	Q9P2J5	SYLC	leucine--tRNA ligase, cytoplasmic
YQQLFEDIR	P33991	MCM4	DNA replication licensing factor MCM4
YQPFKPLSIGGIIILK	Q99460	PSMD1	26S proteasome non-ATPase regulatory subunit 1
YQLLQLVEPFGVISNHLILNK	P43243	MATR3	matrin-3
YQLEIPENFTTR	P52701	MSH6 GTBP	DNA mismatch repair protein Msh6
YQLDPTASISAK	P45880	VDAC2	voltage-dependent anion-selective channel protein 2
YQILPLHSQIPR	Q08211	DHX9	ATP-dependent RNA helicase A
YQGVNLYIK	Q13310	PABP4	polyadenylate-binding protein 4
YQGGFLISR	P55786	PSA	puromycin-sensitive aminopeptidase
YQEVTNNLEFAK	Q14444	CAPR1	caprin-1
YQELINDIAR	P46940	IQGA1	ras GTPase-activating-like protein IQGAP1
YQEALHLGSQLLR	O00231	PSD11	26S proteasome non-ATPase regulatory subunit 11
YQDILVFR	P19623	SPEE	spermidine synthase
YQAVTATLEEK	P40429	RL13A	60S ribosomal protein L13a
YQADITDLLK	Q13330	MTA1	Metastasis-associated protein MTA1
YPQLLPGIR	P23526	SAHH	adenosylhomocysteinase
YPFILPHQQVDK	Q9ULC4	MCTS1	Malignant T-cell-amplified sequence 1
YNEQHVPGSPFTAR	P21333	FLNA	filamin-A
YMLLPNQVWDSIIQQATK	O14980	XPO1	exportin-1
YLYLTPQDYK	Q13085	ACACA	acetyl-CoA carboxylase 1
YLSSVSSQETQGGPLAPMTGTIEK	Q96RQ3	MCCA	methylcrotonoyl-CoA carboxylase subunit alpha, mitochondrial
YLRPHLEATLQLSLK	O00410	IPO5	Importin-5
YLQQLAEKPLETR	Q01433	AMPD2	AMP deaminase 2
YLQLAEELIRPER	Q14566	MCM6	DNA replication licensing factor MCM6
YLQEEVNINR	Q9UHD8	SEPTIN9	septin-9
YLQDNPASGEK	Q16850	CP51A	lanosterol 14-alpha demethylase
YLNQDYEALR	P17655	CAPN2	Calpain-2 catalytic subunit
YLNIFGESQPNPK	Q9UJS0	S2513	calcium-binding mitochondrial carrier protein Aralar2
YLLQEQLK	P36776	LONM	lon protease homolog, mitochondrial
YLIPNATQPESK	P31946	1433B	14-3-3 protein beta/alpha
YLGQDYEQLR	P07384	CAN1	calpain-1 catalytic subunit
YLGPAVLMQAYR	P21912	SDHB	succinate dehydrogenase [ubiquinone] iron-sulfur subunit, mitochondrial
YLEVVLNTLQQASQAQVDK	Q14974	IMB1	importin subunit beta-1
YLESFLAFTTHPSQFLR	Q9HAV4	XPO5	exportin-5
YLEEIATQMR	Q01813	PFKP	ATP-dependent 6-phosphofructokinase, platelet type
YLEATGQLPVK	Q96RP9	EFGM	elongation factor G, mitochondrial
YLEANMTQSALPK	Q9NTK5	OLA1	obg-like ATPase 1
YLDEDTIYHLQPSGR	P31153	MAT2A	S-adenosylmethionine synthase isoform type-2
YKEEYAVLISEAQAIK	Q14204	DYHC1	cytoplasmic dynein 1 heavy chain 1
YIYIMGIQER	P23368	MAOM	NAD-dependent malic enzyme, mitochondrial
YIVQVSPLGIR	Q10570	CPSF1	Cleavage and polyadenylation specificity factor subunit 1
YISPDQLADLYK	P06733	ENOA	alpha-enolase
YIQELWR	P61313	RL15	60S ribosomal protein L15
YIQAEPPTNK	Q8TAQ2	SMARCC2	SWI/SNF complex subunit SMARCC2
YIEIYVQK	Q00610	CLH1	clathrin heavy chain 1
YIDQEELNK	P07900	HS90A	heat shock protein HSP 90-alpha
YICENQDSISSK	P02768	ALB	Albumin
YHTSQSGDEMTSLSEYVSR	P08238	HS90B	heat shock protein HSP 90-beta
YGNQLVR	P33993	MCM7	DNA replication licensing factor MCM7
YGMNPHQTPAQLYTLQPK	P31939	PUR9	bifunctional purine biosynthesis protein PURH
YGLSSMQGWR	O75688	PPM1B	protein phosphatase 1B
YGISSMIQSQEKPDR	P14868	DARS1	Aspartate--tRNA ligase, cytoplasmic
YGINTTDIFQTVDLWEGK	P37802	TAGLN2	transgelin-2
YGIEPTMVVQGVK	A0AVT1	UBA6	ubiquitin-like modifier-activating enzyme 6
YGGQPVPNFPSK	P21333	FLNA	filamin-A
YGGQPLFSEK	Q1KMD3	HNRL2	heterogeneous nuclear ribonucleoprotein U-like protein 2
YGGPPPDSVYSGQQPSVGTEIFVGK	O60506	HNRPQ	heterogeneous nuclear ribonucleoprotein Q
YGGAPQALTLK	O95782	AP2A1	AP-2 complex subunit alpha-1
YGDSGEQIAGFVK	P10619	PPGB	lysosomal protective protein
YGDGIQLTR	P15924	DSP	Desmoplakin
YFYFYNTGLQNQR	P48147	PPCE	prolyl endopeptidase
YFQTYFLTPSVK	P36915	GNL1	guanine nucleotide-binding protein-like 1
YFQHLLGK	Q9Y4L1	HYOU1	hypoxia up-regulated protein 1
YFQFQEEGK	O15144	ARPC2	actin-related protein 2/3 complex subunit 2
YFPTQALNFAFK	P05141	ADT2	ADP/ATP translocase 2
YFHVVIAGPQDSPFEGGTFK	P61088	UBE2N	ubiquitin-conjugating enzyme E2 N
YFGDIISVGQR	Q96CN7	ISOC1	isochorismatase domain-containing protein 1
YFDEISQDTGK	P62495	ERF1	eukaryotic peptide chain release factor subunit 1
YFAQEALTVLSLA	P30153	2AAA	serine/threonine-protein phosphatase 2A 65 kDa regulatory subunit A alpha isoform
YEYQPFAGK	O75083	WDR1	WD repeat-containing protein 1
YESSALPSGQLTSLSEYASR	Q12931	TRAP1	heat shock protein 75 kDa, mitochondrial
YESGDHVAVYPANDSALVNQLGK	P16435	POR	NADPH--cytochrome P450 reductase
YEITEQR	Q02878	RL6	60S ribosomal protein L6
YEHDDIVSTVSVLSSGTQAVSGSK	Q9BQA1	WDR77	Methylosome protein WDR77
YEEVEYYYQR	Q07866	KLC1	kinesin light chain 1
YEELQVTVGR	P35908	KRT2	Keratin, type II cytoskeletal 2 epidermal
YEELQVTAGR	O95678	KRT75	Keratin, type II cytoskeletal 75
YEELQQTAGR	P13647	KRT5	Keratin, type II cytoskeletal 5
YEELQITAGR	P04264	KRT1	Keratin, type II cytoskeletal 1
YDQNYDIR	O00203	AP3B1	AP-3 complex subunit beta-1
YDHQAEEDLR	Q15417	CNN3	calponin-3
YDGQVAVFGSDLQEK	P22314	UBA1	ubiquitin-like modifier-activating enzyme 1
YDEAASYIQSK	P04899	GNAI2	guanine nucleotide-binding protein G(i) subunit alpha-2
YAVNVALQK	Q9NVI1	FANCI	Fanconi anemia group I protein
YAVLYQPLFDK	P55209	NP1L1	nucleosome assembly protein 1-like 1
YASFQVENDQER	P53992	SC24C	protein transport protein Sec24C
YAQAGFEGFK	O75643	SNRNP200	U5 small nuclear ribonucleoprotein 200 kDa helicase
YAGSALQYEDVSTAVQNLQK	Q9NP79	VTA1	vacuolar protein sorting-associated protein VTA1 homolog
YADQEVPR	Q14315	FLNC	Filamin-C
YAAVTQFEATDAR	P55786	PSA	puromycin-sensitive aminopeptidase
YAASSYLSLTPEQWK	A0M8Q6	IGLC7	Immunoglobulin lambda constant 7
YAALYQPLFDK	Q99733	NAP1L4	Nucleosome assembly protein 1-like 4
WTTLNSLQLHGLQLR	Q08J23	NSUN2	tRNA (cytosine(34)-C(5))-methyltransferase
WTNQLNSLNQAVVSK	P61201	COPS2	COP9 signalosome complex subunit 2
WTLLQEQGTK	P02538	KRT6A	Keratin, type II cytoskeletal 6A
WSVHIAMHPQVNIYSVTR	Q16658	FSCN1	fascin
WSTDDVQINDISLQDYIAVK	P46782	RS5	40S ribosomal protein S5
WSQLLANSAAR	Q13813	SPTN1	spectrin alpha chain, non-erythrocytic 1
WSPESPLQAPR	Q8NBJ5	GT251	procollagen galactosyltransferase 1
WSLQSEAHR	Q16658	FSCN1	fascin
WQNNLLPSR	P62244	RS15A	40S ribosomal protein S15a
WQLSVATEQPELEGPR	Q9NR30	DDX21	nucleolar RNA helicase 2
WQFLTLR	Q9P2J5	SYLC	leucine--tRNA ligase, cytoplasmic
WQDIQNDPR	Q14839	CHD4	chromodomain-helicase-DNA-binding protein 4
WQALLVQIR	Q14204	DYHC1	cytoplasmic dynein 1 heavy chain 1
WLYQRPQASHQLLR	P06132	DCUP	uroporphyrinogen decarboxylase
WLSTSIPEAQWHSSLAR	P49327	FASN	Fatty acid synthase
WLQDLQEENESLK	Q86UP2	KTN1	Kinectin
WLPVQESSTDDK	Q9Y6A9	SPCS1	signal peptidase complex subunit 1
WLPAGDALLQMITIHLPSPVTAQK	P13639	EF2	elongation factor 2
WLLLTGISAQQNR	Q00610	CLH1	clathrin heavy chain 1
WKPPMIDNPSYQGIWKPR	P27824	CANX	Calnexin (IP90)
WIDETPPVDQPSR	Q15257	PTPA	Serine/threonine-protein phosphatase 2A activator
WFTLSSGQGQVLLR	Q9BSJ8	ESYT1	Extended synaptotagmin-1
WFNGQPIHAELSPVTDFR	Q01081	U2AF1	Splicing factor U2AF 35 kDa subunit
WFEENASQSTVK	Q12905	ILF2	interleukin enhancer-binding factor 2
WELLQQVDTSTR	P04264	KRT1	Keratin, type II cytoskeletal 1
WEEVQSYIR	Q86UP2	KTN1	kinectin
WALSQSNPSALR	P55072	TERA	transitional endoplasmic reticulum ATPase
VYWNDGLDQYR	O43252	PAPS1	bifunctional 3'-phosphoadenosine 5'-phosphosulfate synthase 1
VYVQHLLK	P16435	NCPR	NADPH--cytochrome P450 reductase
VYQWDDPDPR	P49327	FAS	fatty acid synthase
VYNVTQHAVGIVVNK	P46778	RL21	60S ribosomal protein L21
VWQVTIGTR	P63244	RACK1	guanine nucleotide-binding protein subunit beta-2-like 1
VWQLGSSSPNFTLEGHEK	P35606	COPB2	coatomer subunit beta'
VWAHYEEQPVEEVMPVLEEK	Q7KZF4	SND1	staphylococcal nuclease domain-containing protein 1
VVVYSNTIQSIIAIIR	P08754	GNAI3	Guanine nucleotide-binding protein G(i) subunit alpha-3
VVVSGLPPSGSWQDLK	Q07955	SRSF1	Serine/arginine-rich splicing factor 1
VVVQVLAEEPEAVLK	P49327	FAS	fatty acid synthase
VVTNYNSAHDQNSNLLIEYFR	P21980	TGM2	protein-glutamine gamma-glutamyltransferase 2
VVSSVLQFGNISFK	P35580	MYH10	myosin-10
VVSSIEQK	P63104	1433Z	14-3-3 protein zeta/delta
VVSQYHELVVQAR	Q16891	MIC60	mitochondrial inner membrane protein
VVSEDFLQDVSASTK	P09874	PARP1	poly [ADP-ribose] polymerase 1
VVQMLGSLGGQINK	P78527	PRKDC	DNA-dependent protein kinase catalytic subunit
VVPSYMQAVNR	Q8TEX9	IPO4	importin-4
VVPIASLTPYQSK	P27694	RFA1	replication protein A 70 kDa DNA-binding subunit
VVNVELPIEANLVWQLGK	Q92598	HS105	heat shock protein 105 kDa
VVLQELR	Q15819	UBE2V2	Ubiquitin-conjugating enzyme E2 variant 2
VVISLQLTAEK	P30041	PRDX6	peroxiredoxin-6
VVIIGAGKPAAVVLQTK	Q14697	GANAB	neutral alpha-glucosidase AB
VVIFQQEQENK	P63151	2ABA	serine/threonine-protein phosphatase 2A 55 kDa regulatory subunit B alpha isoform
VVIEDEQLVLGASQEPVGR	Q6IBS0	TWF2	Twinfilin-2
VVHIMDFQR	P43243	MATR3	Matrin-3
VVGSELIQK	P62191	PRS4	26S protease regulatory subunit 4
VVGSEFVQK	P43686	PRS6B	26S protease regulatory subunit 6B
VVGESLSPAFHLQLEESTGSR	O15269	SPTC1	serine palmitoyltransferase 1
VVGAMQLYSVDR	Q00610	CLH1	clathrin heavy chain 1
VVFQEFR	P35579	MYH9	myosin-9
VVFEQTK	P60174	TPIS	triosephosphate isomerase
VVEIAPAAHLDPQLR	P11498	PC	Pyruvate carboxylase, mitochondrial
VVAEPVELAQEFR	O75489	NDUS3	NADH dehydrogenase [ubiquinone] iron-sulfur protein 3, mitochondrial
VTYHPDGPEGQAYDVDFTPPFR	Q15046	SYK	lysine--tRNA ligase
VTVLTLQDK	Q9UBT2	SAE2	SUMO-activating enzyme subunit 2
VTVLGQPK	B9A064	IGLL5	Immunoglobulin lambda-like polypeptide 5
VTVLGHVQR	P08237	PFKAM	6-phosphofructokinase, muscle type
VTVLFAGQHISK	O75369	FLNB	Filamin-B
VTTVVATPGQGPDRPQEVSYTDTK	P49841	GSK3B	glycogen synthase kinase-3 beta
VTTVVATLGQGPER	P49840	GSK3A	glycogen synthase kinase-3 alpha
VTTQTSLPLFR	Q13596	SNX1	Sorting nexin-1
VTTLPGHIQAVYVQNVVK	O14617	AP3D1	AP-3 complex subunit delta-1
VTSVVFHPSQDLVFSASPDATIR	Q9UMS4	PRP19	pre-mRNA-processing factor 19
VTQQGLK	P49327	FAS	fatty acid synthase
VTQLYVPASR	Q15386	UBE3C	ubiquitin-protein ligase E3C
VTQILQSPAFR	Q9UEY8	ADD3	Gamma-adducin
VTQDATPGSALDK	Q01581	HMCS1	hydroxymethylglutaryl-CoA synthase, cytoplasmic
VTPQSLFILFGVYGDVQR	P26599	PTBP1	polypyrimidine tract-binding protein 1
VTPQEGHLPALR	A6NKG5	RTL1	retrotransposon-like protein 1
VTNLHLMLQLVR	O60763	USO1	General vesicular transport factor p115
VTMQNLNDR	P02533	KRT14	Keratin, type I cytoskeletal 14
VTLSFPSTLQTGTGTLK	P55786	PSA	puromycin-sensitive aminopeptidase
VTLMQLPTR	P55884	EIF3B	eukaryotic translation initiation factor 3 subunit B
VTLGTQPTVLR	Q16531	DDB1	DNA damage-binding protein 1
VTLAVSDLQK	Q9HC38	GLOD4	glyoxalase domain-containing protein 4
VTIEYYSQLK	P49189	ALDH9A1	4-trimethylaminobutyraldehyde dehydrogenase
VTIAQGGVLPNIQAVLLPK	Q6FI13	H2AC18	Histone H2A type 2-A
VTHAVVTVPAYFNDAQR	P11021	BIP	78 kDa glucose-regulated protein
VTGQFPWSSLR	Q9Y512	SAM50	sorting and assembly machinery component 50 homolog
VTEGQQER	Q13263	TIF1B	transcription intermediary factor 1-beta
VTEGLTDVILYHQPDDK	O60506	HNRPQ	heterogeneous nuclear ribonucleoprotein Q
VTDIIMQK	Q7Z4S6	KI21A	kinesin-like protein KIF21A
VTAQGPGLEPSGNIANK	P21333	FLNA	Filamin-A
VSTTLNVAQAYYAR	O43795	MYO1B	unconventional myosin-Ib
VSSLQAEPLPR	Q9H2M9	RAB3GAP2	Rab3 GTPase-activating protein non-catalytic subunit
VSQWWER	Q9P035	HACD3	very-long-chain (3R)-3-hydroxyacyl-[acyl-carrier protein] dehydratase 3
VSQPIEGHAASFAQFK	Q00610	CLH1	clathrin heavy chain 1
VSQGSKDPAEGDGAQPEETPR	Q14697	GANAB	neutral alpha-glucosidase AB
VSQGQLVVMQPEK	P13667	PDIA4	protein disulfide-isomerase A4
VSPETVDSVIMGNVLQSSSDAIYLAR	P42765	THIM	3-ketoacyl-CoA thiolase, mitochondrial
VSNLQYLHSYLTYIK	Q9UHB9	SRP68	signal recognition particle subunit SRP68
VSLQVHPDR	Q8WXX5	DNJC9	dnaJ homolog subfamily C member 9
VSHVLAALQAGNR	Q9Y490	TLN1	talin-1
VSGSELVQK	P62195	PRS8	26S protease regulatory subunit 8
VSAPGVLTAQDR	Q9C0C2	TNKS1BP1	182 kDa tankyrase-1-binding protein
VQVYQEPNR	O60256	KPRB	phosphoribosyl pyrophosphate synthase-associated protein 2
VQVALGNISSK	O75935	DCTN3	dynactin subunit 3
VQVALEELQDLK	Q14204	DYHC1	cytoplasmic dynein 1 heavy chain 1
VQTLSNQPLLK	Q8N163	CCAR2	DBIRD complex subunit KIAA1967
VQSVEQIR	P56545	CTBP2	C-terminal-binding protein 2
VQSDGQIVLVDDWIK	Q08211	DHX9	ATP-dependent RNA helicase A
VQQTVQDLFGR	P38646	GRP75	stress-70 protein, mitochondrial
VQQQEDEITVLK	Q9HC35	EMAL4	echinoderm microtubule-associated protein-like 4
VQQLVPK	O43707	ACTN4	alpha-actinin-4
VQQAELHTGSLPR	Q13085	ACACA	acetyl-CoA carboxylase 1
VQPNEAVYTK	P11413	G6PD	glucose-6-phosphate 1-dehydrogenase
VQLVVGDGR	P22061	PIMT	protein-L-isoaspartate(D-aspartate) O-methyltransferase
VQLSGPQEAEK	Q9UNS2	CSN3	COP9 signalosome complex subunit 3
VQIVSIK	Q14344	GNA13	guanine nucleotide-binding protein subunit alpha-13
VQISQLHQEIQR	Q8N1N4	K2C78	keratin, type II cytoskeletal 78
VQISPDSGGLPER	Q92945	FUBP2	far upstream element-binding protein 2
VQIEHISSLIK	O00231	PSD11	26S proteasome non-ATPase regulatory subunit 11
VQGSDSDEEVVVATTR	P26640	VARS1	Valine--tRNA ligase
VQGGALEDSQLVAGVAFK	Q99832	TCPH	T-complex protein 1 subunit eta
VQEVQVVGVK	Q96CM8	ACSF2	Medium-chain acyl-CoA ligase ACSF2, mitochondrial
VQEVLLK	Q9Y4L1	HYOU1	hypoxia up-regulated protein 1
VQESADELQK	P84085	ARF5	ADP-ribosylation factor 5
VQEQVHTLLSQDQAQAAR	Q07065	CKAP4	cytoskeleton-associated protein 4
VQELQNLLK	Q86UP2	KTN1	kinectin
VQDDEVGDGTTSVTVLAAELLR	P78371	CCT2	T-complex protein 1 subunit beta
VQAQVIQETIVPK	Q15459	SF3A1	splicing factor 3A subunit 1
VQALEEANNDLENK	P35527	K1C9	keratin, type I cytoskeletal 9
VQAFGWSLPQK	O60271	JIP4	C-Jun-amino-terminal kinase-interacting protein 4
VPVLLEEQSIVK	Q9NRF8	PYRG2	CTP synthase 2
VPVGDQPPDIEYQIK	P50570	DNM2	Dynamin-2
VPVGDQPPDIEFQIR	Q05193	DYN1	dynamin-1
VPVDVAYQR	Q15149	PLEC	Plectin
VPSALAPASQEPSPAASAEADGK	O00429	DNM1L	dynamin-1-like protein
VPQVSTPTLVEVSR	P02768	ALB	Albumin
VPQLPITNFNR	Q14315	FLNC	filamin-C
VPQIEVETHK	Q14204	DYHC1	cytoplasmic dynein 1 heavy chain 1
VPQDVLQK	P49903	SPS1	selenide, water dikinase 1
VPPPWLIAMQR	Q13435	SF3B2	splicing factor 3B subunit 2
VPPAINQFTQALDR	P62424	RL7A	60S ribosomal protein L7a
VPLQDLMVR	Q9ULA0	DNPEP	aspartyl aminopeptidase
VPLEVQEADEAK	P26640	VARS1	Valine--tRNA ligase
VPETVSAATQTIK	Q12888	TP53B	tumor suppressor p53-binding protein 1
VPEILQLSDALR	P49589	SYCC	cysteine--tRNA ligase, cytoplasmic
VNQPASFAVSLNGAK	P21333	FLNA	Filamin-A
VNQPASFAIR	O75369	FLNB	filamin-B
VNNSSLIGVGYTQTLRPGVK	P45880	VDAC2	voltage-dependent anion-selective channel protein 2
VNNSSLIGLGYTQTLKPGIK	P21796	VDAC1	voltage-dependent anion-selective channel protein 1
VNNASLIGLGYTQTLRPGVK	Q9Y277	VDAC3	voltage-dependent anion-selective channel protein 3
VNLLSFTGSTQVGK	P49419	AL7A1	alpha-aminoadipic semialdehyde dehydrogenase
VNIKPQVDR	P23526	SAHH	adenosylhomocysteinase
VNIIGEVVDQGSTNLK	Q9UEY8	ADDG	gamma-adducin
VNFTVDQIR	P13639	EF2	elongation factor 2
VNEALLQR	P20711	DDC	aromatic-L-amino-acid decarboxylase
VNDTIQIDLETGK	P62701	RS4X	40S ribosomal protein S4, X isoform
VMVQPINLIFR	P62304	RUXE	small nuclear ribonucleoprotein E
VMSQEIQEQLHK	Q14204	DYHC1	cytoplasmic dynein 1 heavy chain 1
VMQVLNADAIVVK	Q7KZF4	SND1	staphylococcal nuclease domain-containing protein 1
VLYVQDSLEGEAR	P48147	PPCE	prolyl endopeptidase
VLYQVEGFVDK	O43795	MYO1B	unconventional myosin-Ib
VLYDAEISQIHQSVTDTNVILSMDNSR	P35908	KRT2	Keratin, type II cytoskeletal 2 epidermal
VLVTGAAGQIAYSLLYSIGNGSVFGK	P40925	MDHC	malate dehydrogenase, cytoplasmic
VLVQVSYAIGVSHPLSISIFHYGTSQK	P31153	MAT2A	S-adenosylmethionine synthase isoform type-2
VLVQNAAGSQEK	Q9Y490	TLN1	talin-1
VLVMLAAQSR	Q969Z0	TBRG4	FAST kinase domain-containing protein 4
VLVLSQDYGK	Q01082	SPTBN1	Spectrin beta chain, non-erythrocytic 1
VLVDQTTGLSR	Q15717	ELAV1	ELAV-like protein 1
VLTVINQTQK	P42766	RL35	60S ribosomal protein L35
VLTTGYWPTQSATPK	Q13618	CUL3	cullin-3
VLTPTQVK	P30086	PEBP1	phosphatidylethanolamine-binding protein 1 preproprotein
VLTELLEQER	Q13428	TCOF	treacle protein
VLSQQAASVVK	P30566	PUR8	adenylosuccinate lyase
VLSGTIHAGQPVK	Q15029	EFTUD2	116 kDa U5 small nuclear ribonucleoprotein component
VLSGDLGQLPTGIR	Q16822	PCK2	Phosphoenolpyruvate carboxykinase [GTP], mitochondrial
VLSAPPHFHFGQTNR	P26641	EF1G	elongation factor 1-gamma
VLRPQVTAVAQQNQGEVPEPQDMK	Q14204	DYHC1	cytoplasmic dynein 1 heavy chain 1
VLQVSFK	Q12926	ELAVL2	ELAV-like protein 2
VLQVIIQLR	Q7Z6Z7	HUWE1	E3 ubiquitin-protein ligase HUWE1
VLQSFTVDSSK	O75369	FLNB	Filamin-B
VLQSALAAIR	Q12905	ILF2	interleukin enhancer-binding factor 2
VLQQAFNYLNQGVVHSITWK	O15397	IPO8	importin-8
VLQPTVFPVVPR	P33121	ACSL1	long-chain-fatty-acid--CoA ligase 1
VLQLYQITQINHGLMMVGPSGSGK	Q14204	DYHC1	cytoplasmic dynein 1 heavy chain 1
VLQLTSWDEDAWASK	P18206	VINC	vinculin isoform meta-VCL
VLQLINDNTATALSYGVFR	Q9Y4L1	HYOU1	hypoxia up-regulated protein 1
VLQHYQESDKGEELGPGNVQK	Q9Y6C9	MTCH2	mitochondrial carrier homolog 2
VLQGDLVMNVYR	P49327	FAS	fatty acid synthase
VLQDMGLPTGAEGR	Q12906	ILF3	Interleukin enhancer-binding factor 3
VLQAELK	Q13085	ACACA	acetyl-CoA carboxylase 1
VLLVLELQGLQK	Q14697	GANAB	Neutral alpha-glucosidase AB
VLLTTQGVDMISK	Q14204	DYHC1	cytoplasmic dynein 1 heavy chain 1
VLLQEEGTR	P15924	DSP	Desmoplakin
VLLESEQFLTELTR	P37108	SRP14	signal recognition particle 14 kDa protein
VLLDQLR	Q9HDC9	APMAP	adipocyte plasma membrane-associated protein
VLIQVGYEPLPPTIGR	Q9Y6C9	MTCH2	mitochondrial carrier homolog 2
VLIGGDETPEGQR	O60701	UGDH	UDP-glucose 6-dehydrogenase
VLIDPVSVQDK	P41252	IARS1	Isoleucine--tRNA ligase, cytoplasmic
VLHGEQYLELYKPLPR	P51659	DHB4	peroxisomal multifunctional enzyme type 2
VLGYIQLGQK	P30837	AL1B1	aldehyde dehydrogenase X, mitochondrial
VLGVPPPQIFWK	Q8WX93	PALLD	palladin
VLGVPIIVQASQAEK	Q14498	RBM39	RNA-binding protein 39
VLGIQVDTDGSGR	P33992	MCM5	DNA replication licensing factor MCM5
VLGEAMTGISQNAK	Q9Y490	TLN1	talin-1
VLGATLLPDLIQK	P55786	PSA	puromycin-sensitive aminopeptidase
VLFPGNSTQYNILEGLEK	P46821	MAP1B	microtubule-associated protein 1B
VLFPGNAPQNK	P78559	MAP1A	microtubule-associated protein 1A
VLFASQEIPASPFR	O75369	FLNB	filamin-B
VLEQPVVVQSVGTDGR	Q9BZE1	RM37	39S ribosomal protein L37, mitochondrial
VLEQLTGQTPVFSK	P62913	RL11	60S ribosomal protein L11
VLEQLIVAHFPMQSR	P78527	PRKDC	DNA-dependent protein kinase catalytic subunit
VLEALQVLR	Q9H7D7	WDR26	WD repeat-containing protein 26
VLDQVETELQR	Q8TB36	GDAP1	ganglioside-induced differentiation-associated protein 1
VLDNYLTSPLPEEVDETSAEDEGVSQR	O00299	CLIC1	chloride intracellular channel protein 1
VLDLQQIK	Q9UNM6	PSD13	26S proteasome non-ATPase regulatory subunit 13
VLDLQADSR	Q9HD20	AT131	probable cation-transporting ATPase 13A1
VLDFEHFLPMLQTVAK	P60660	MYL6	Myosin light polypeptide 6
VLDDGELLVQQTK	P46459	NSF	vesicle-fusing ATPase
VLDAIIQEK	Q9NTJ3	SMC4	structural maintenance of chromosomes protein 4
VLAVNQENEQLMEDYEK	P12814	ACTN1	alpha-actinin-1
VLAVNQENEHLMEDYEK	O43707	ACTN4	alpha-actinin-4
VLAQNSGFDLQETLVK	P40227	TCPZ	T-complex protein 1 subunit zeta
VLANPGNSQVAR	Q14974	IMB1	importin subunit beta-1
VLAALQER	Q99733	NP1L4	nucleosome assembly protein 1-like 4
VKPLQDQNELFGK	Q12874	SF3A3	splicing factor 3A subunit 3
VKPLLQVTR	P35580	MYH10	myosin-10
VKPLLQVSR	P35579	MYH9	myosin-9
VIVQQPGER	O94832	MYO1D	unconventional myosin-Id
VIVQFQPSSVPDEWGTTQDGQTRPR	Q9Y6Y8	SEC23IP	SEC23-interacting protein
VITMFVQR	P13010	XRCC5	X-ray repair cross-complementing protein 5
VITEYLNAQESAK	Q7KZF4	SND1	staphylococcal nuclease domain-containing protein 1
VISGVLQLGNIVFK	P35579	MYH9	myosin-9
VISFEEQVASIR	Q9BT78	COPS4	COP9 signalosome complex subunit 4
VISESPPDQWEAR	Q92616	GCN1	translational activator GCN1
VIRPLDQPSSFDATPYIK	Q86VP6	CAND1	cullin-associated NEDD8-dissociated protein 1
VIQYLAYVASSHK	P35579	MYH9	myosin-9
VIQYLAHVASSHK	P35579	MYH9	myosin-9
VIQVAAGSSNLK	P05091	ALDH2	aldehyde dehydrogenase, mitochondrial
VIQIVINR	O94973	AP2A2	AP-2 complex subunit alpha-2
VIQGLYSGVTTVELDTLAAETAATLTTK	P23921	RIR1	ribonucleoside-diphosphate reductase large subunit
VIQENEHALQK	Q9NTJ3	SMC4	structural maintenance of chromosomes protein 4
VIQEIVDK	P51114	FXR1	RNA-binding protein FXR1
VIQAGMFDQK	P51531	SNF2L2	Probable global transcription activator SNF2L2
VIPAADLSQQISTAGTEASGTGNMK	P11216	PYGB	glycogen phosphorylase, brain form
VINQILTEMDGMSTK	P55072	TERA	transitional endoplasmic reticulum ATPase
VILGSEAAQQHPEEVR	Q9NY33	DPP3	dipeptidyl peptidase 3
VIILMLTNQTVHR	Q12769	NU160	nuclear pore complex protein Nup160
VIGSELVQK	P35998	KRT2	Keratin, type II cytoskeletal 2 epidermal
VIGQDSSEIHFK	P63165	SUMO1	small ubiquitin-related modifier 1
VIGNQSLVNELAFTAR	Q13011	ECH1	delta(3,5)-Delta(2,4)-dienoyl-CoA isomerase, mitochondrial
VIGLSSDLQQVGGASAR	O00303	EIF3F	eukaryotic translation initiation factor 3 subunit F
VIFPAAEDKDQDLITIIGK	Q00341	HDLBP	Vigilin
VIEQLLVGLK	Q9BTW9	TBCD	tubulin-specific chaperone D
VIEPQYFGLAYLFR	P42704	LPPRC	leucine-rich PPR motif-containing protein, mitochondrial
VIAPNPAQLQGQR	Q8WXI9	P66B	transcriptional repressor p66-beta
VIAALLQTMEDQGNQR	O00410	IPO5	importin-5
VHTVEDYQAIVDAEWNILYDK	Q99832	TCPH	T-complex protein 1 subunit eta
VHMTWVQPR	Q9UNM6	PSD13	26S proteasome non-ATPase regulatory subunit 13
VHLQTQQEVK	Q9UBX3	DIC	mitochondrial dicarboxylate carrier
VHIGQVIMSIR	P27635	RPL10	Large ribosomal subunit protein uL16
VHGPGIQSGTTNKPNK	P21333	FLNA	filamin-A
VGWEQLLTTIAR	O43707	ACTN4	alpha-actinin-4
VGVWNVPYISQAYVIR	O60568	PLOD3	Multifunctional procollagen lysine hydroxylase and glycosyltransferase LH3
VGVPTVDLDAQGR	O60306	AQR	intron-binding protein aquarius
VGVKPVGSDPDFQPELSGAGSR	O43396	TXNL1	thioredoxin-like protein 1
VGTFFSEVKPAGPTVEQQGEMAR	P54886	ALDH18A1	Delta-1-pyrroline-5-carboxylate synthase (P5CS)
VGSAAQTR	P25705	ATPA	ATP synthase subunit alpha, mitochondrial
VGQGYPHDPPK	P61081	UBC12	NEDD8-conjugating enzyme Ubc12
VGQEIEVRPGIVSK	P41091	IF2G	eukaryotic translation initiation factor 2 subunit 3
VGQAVDVVGQAGKPK	Q13200	PSMD2	26S proteasome non-ATPase regulatory subunit 2
VGQALELPLR	Q8TEM1	PO210	nuclear pore membrane glycoprotein 210
VGLQVVAVK	P10809	CH60	60 kDa heat shock protein, mitochondrial
VGINYQPPTVVPGGDLAK	P68366	TUBA4A	Tubulin alpha-4A chain
VGFQYEGTYK	P11413	G6PD	Glucose-6-phosphate 1-dehydrogenase
VGEQAQVVIIDMNDPSNPIR	Q00610	CLH1	clathrin heavy chain 1
VGDPQELNGITR	P49327	FAS	fatty acid synthase
VGDDPAVWQLK	Q9Y490	TLN1	talin-1
VGAIPANALDDGQWSQGLISAAR	Q9Y490	TLN1	talin-1
VFVGGLSPDTSEEQIK	O14979	HNRDL	heterogeneous nuclear ribonucleoprotein D-like
VFSDIGAIQSLK	Q6SZW1	SARM1	sterile alpha and TIR motif-containing protein 1
VFSDEVQQQAQLSTIR	Q9Y262	EIF3L	eukaryotic translation initiation factor 3 subunit L
VFQVEYAMK	P25788	PSA3	proteasome subunit alpha type-3
VFQFLNAK	P83731	RL24	60S ribosomal protein L24
VFMQEFK	O15144	ARPC2	actin-related protein 2/3 complex subunit 2
VFLAVFVEQPTPFLPR	O60568	PLOD3	procollagen-lysine,2-oxoglutarate 5-dioxygenase 3
VFGIQLK	Q9UNF1	MAGED2	Melanoma-associated antigen D2
VFEVSLADLQNDEVAFR	P61247	RS3A	40S ribosomal protein S3a
VFDPQNDKPSK	O15145	ARPC3	actin-related protein 2/3 complex subunit 3
VFDLQFSTDSPR	Q15003	CND2	condensin complex subunit 2
VFDEFKPLVEEPQNLIK	P02768	ALB	Albumin
VFASLPQVER	O75083	WDR1	WD repeat-containing protein 1
VEVDGSIMEGGGQILR	O00442	RTCA	RNA 3'-terminal phosphate cyclase
VEQVLSLEPQHELK	O95292	VAPB	vesicle-associated membrane protein-associated protein B/C
VEQLMEWSSR	Q13454	TUSC3	tumor suppressor candidate 3
VEQLGAEGNVEESQK	Q9Y383	LC7L2	putative RNA-binding protein Luc7-like 2
VENQENVSNLVIEDTELK	Q01518	CAP1	adenylyl cyclase-associated protein 1
VENMVDQLLR	P41252	SYIC	isoleucine--tRNA ligase, cytoplasmic
VELTITPDFQWDEK	O75643	SNRNP200	U5 small nuclear ribonucleoprotein 200 kDa helicase
VELSQLR	P0C7P4	UQCRFS1P1	Putative cytochrome b-c1 complex subunit Rieske-like protein 1
VELQELNDR	P08670	VIME	vimentin
VEITYTPSDGTQK	O75874	IDHC	isocitrate dehydrogenase [NADP] cytoplasmic
VEIIANDQGNR	P0DMV8	HS71A	heat shock 70 kDa protein 1A/1B
VEGRPGASLPPLDLQALEK	P11498	PC	Pyruvate carboxylase, mitochondrial
VEEEAAQK	P35579	MYH9	myosin-9
VEAQVYILSK	P49411	EFTU	elongation factor Tu, mitochondrial
VEAQLQELQVK	P35579	MYH9	myosin-9
VEAKPEVQSQPPR	Q9UN86	G3BP2	ras GTPase-activating protein-binding protein 2
VDWQENDFSK	Q13085	ACACA	acetyl-CoA carboxylase 1
VDVGKDQEFTVK	P21333	FLNA	filamin-A
VDTILEFSQNMNTK	O14980	XPO1	exportin-1
VDSILLTHIGDDNLPGINSMLQR	P46821	MAP1B	microtubule-associated protein 1B
VDSGIQPGSDISIYYDPMISK	P05165	PCCA	Propionyl-CoA carboxylase alpha chain, mitochondrial
VDQSILTGESVSVIK	P16615	AT2A2	sarcoplasmic/endoplasmic reticulum calcium ATPase 2
VDQLTAQLADLAAR	P18206	VINC	vinculin isoform meta-VCL
VDQIQEIVTGNPTVIK	P46940	IQGA1	ras GTPase-activating-like protein IQGAP1
VDPEIQNVK	P35908	KRT2	Keratin, type II cytoskeletal 2 epidermal
VDNIQAGELTEGIWR	Q08945	SSRP1	FACT complex subunit SSRP1
VDLLNQEIEFLK	P35908	KRT2	Keratin, type II cytoskeletal 2 epidermal
VDHQTGPIVWGEPGTNGQHAFYQLIHQGTK	P06744	G6PI	glucose-6-phosphate isomerase
VDFPQDQLTALTGR	P40926	MDHM	malate dehydrogenase, mitochondrial
VDEAVAVLQAHQAK	P11940	PABPC1	Polyadenylate-binding protein 1
VDATEESDLAQQYGVR	P07237	PDIA1	protein disulfide-isomerase
VDAQFGGIDQR	P54577	SYYC	tyrosine--tRNA ligase, cytoplasmic
VAYFQSALDK	Q9H3S7	PTN23	tyrosine-protein phosphatase non-receptor type 23
VAVVNQIAR	Q01082	SPTB2	spectrin beta chain, non-erythrocytic 1
VAVQGDVVR	P07814	EPRS1	Bifunctional glutamate/proline--tRNA ligase
VAVLQALASTVNR	Q96EY7	PTCD3	pentatricopeptide repeat domain-containing protein 3, mitochondrial
VAVLLLAGGQGTR	Q16222	UAP1	UDP-N-acetylhexosamine pyrophosphorylase 2
VAVLISGTGSNLQALIDSTR	P22102	PUR2	trifunctional purine biosynthetic protein adenosine-3
VAVLGASGGIGQPLSLLLK	P40926	MDHM	malate dehydrogenase, mitochondrial
VAVGQEQAFSVNTR	Q14315	FLNC	filamin-C
VAVEYLDPSPEVQK	O43684	BUB3	Mitotic checkpoint protein BUB3
VAVAIPNRPPDAVLTDTTSLNQAALYR	P51659	DHB4	peroxisomal multifunctional enzyme type 2
VATWFNQPAR	P26373	RL13	60S ribosomal protein L13
VASGGGGVGDGVQEPTTGNWR	O00429	DNM1L	dynamin-1-like protein
VAQVAEITYGQK	O94905	ERLIN2	Erlin-2
VAQPTITDNK	P21333	FLNA	filamin-A
VAQLEQVYIR	P62318	SMD3	small nuclear ribonucleoprotein Sm D3
VAQGVSGAVQDK	P12268	IMPDH2	Inosine-5'-monophosphate dehydrogenase 2
VAQFLVIYAPR	Q9H2M9	RBGPR	rab3 GTPase-activating protein non-catalytic subunit
VAPPGLTQIPQIQK	P05026	ATP1B1	Sodium/potassium-transporting ATPase subunit beta-1
VAPAQPSEEGPGR	P23588	IF4B	eukaryotic translation initiation factor 4B
VANPSGNLTETYVQDR	P21333	FLNA	filamin-A
VALSPAGVQNLVK	Q13423	NNTM	NAD(P) transhydrogenase, mitochondrial
VAISNPPQR	Q15020	SART3	Squamous cell carcinoma antigen recognized by T-cells 3
VAIQFLK	O95470	SGPL1	sphingosine-1-phosphate lyase 1
VAIHEAMEQQTISIAK	P33992	MCM5	DNA replication licensing factor MCM5
VAGYAALLEQYQK	P54920	NAPA	Alpha-soluble NSF attachment protein
VAGQDGSVVQFK	P61956	SUMO2	small ubiquitin-related modifier 2
VAGIESHSELQISR	Q14980	NUMA1	Nuclear mitotic apparatus protein 1
VAEVEGEQVDNK	O95202	LETM1	LETM1 and EF-hand domain-containing protein 1, mitochondrial
VAEQVLNAVNK	Q9HB40	RISC	retinoid-inducible serine carboxypeptidase
VAEQTPLSALYLASLIK	P30837	ALDH1B1	Aldehyde dehydrogenase X, mitochondrial
VAEELALEQAK	Q9NX63	CHCHD3	MICOS complex subunit MIC19
VADYIPQLAK	O94925	GLSK	glutaminase kidney isoform, mitochondrial
VADPTPFHIQAEVTMK	P16152	CBR1	Carbonyl reductase [NADPH] 1
VADLTEQYNEQYGAVR	Q96PK6	RBM14	RNA-binding protein 14
VAAMSVAQR	O43143	DHX15	putative pre-mRNA-splicing factor ATP-dependent RNA helicase DHX15
VAALQNLVK	Q14974	IMB1	importin subunit beta-1
VAAIEALNDGELQK	P50502	F10A1	hsc70-interacting protein
VAAGLQIK	Q14974	IMB1	importin subunit beta-1
VAAGLPPILVHTDAAQALGK	Q96I15	SCLY	selenocysteine lyase
VAAETQSPSLFGSTK	Q9UKX7	NUP50	nuclear pore complex protein Nup50
TYNASITLQQQLK	P11387	TOP1	DNA topoisomerase 1
TYEEGLKHEANNPQLK	P31948	STIP1	stress-induced-phosphoprotein 1
TYEAALETIQNMSK	O00231	PSD11	26S proteasome non-ATPase regulatory subunit 11
TWNDPSVQQDIK	P11021	BIP	78 kDa glucose-regulated protein
TWEQQQEVVSR	Q9UJU6	DBNL	drebrin-like protein
TVWEISQK	P23921	RIR1	ribonucleoside-diphosphate reductase large subunit
TVWDWELMNDIKPIWQRPSK	P14625	HSP90B1	Endoplasmin
TVVSGLVNHVPLEQMQNR	Q12904	AIMP1	aminoacyl tRNA synthase complex-interacting multifunctional protein 1
TVTNAVVTVPAYFNDSQR	P11142	HSPA8	heat shock cognate 71 kDa protein
TVSQIISLQTLK	O76021	RL1D1	ribosomal L1 domain-containing protein 1
TVSPDRLELEAAQK	Q14974	IMB1	importin subunit beta-1
TVSDLIDQK	Q9Y262	EIF3L	eukaryotic translation initiation factor 3 subunit L
TVQTAVFLYSLYK	Q14839	CHD4	chromodomain-helicase-DNA-binding protein 4
TVQLTSSELESTLETLK	P42704	LPPRC	leucine-rich PPR motif-containing protein, mitochondrial
TVQIEASTVEIEER	Q15019	SEPTIN2	septin-2
TVQGPPTSDDIFER	P04181	OAT	ornithine aminotransferase, mitochondrial
TVPPAVTGITFLSGGQSEEEASINLNAINK	P04075	ALDOA	fructose-bisphosphate aldolase A
TVPLAGHVGFDSLPDQLVNK	Q14141	SEPTIN6	septin-6
TVNVVQFEPSK	P41250	GARS	glycine--tRNA ligase
TVLQRPLSLIQGPPGTGK	Q92900	UPF1	Regulator of nonsense transcripts 1
TVLNYLQSSGK	Q9NZJ4	SACS	Sacsin (DnaJ homolog subfamily C member 29) (DNAJC29)
TVLGTPEVLLGALPGAGGTQR	P40939	ECHA	trifunctional enzyme subunit alpha, mitochondrial
TVLELQYVLDK	Q14444	CAPR1	caprin-1
TVLDQQQTPSR	P42704	LRPPRC	Leucine-rich PPR motif-containing protein, mitochondrial
TVISQSLSK	P38606	VATA	V-type proton ATPase catalytic subunit A
TVIIEQSWGSPK	P10809	CH60	60 kDa heat shock protein, mitochondrial
TVIAQHHVAPR	Q6ZVX7	NCCRP1	F-box only protein 50
TVGALQVLGTEAQSSLLK	P78527	PRKDC	DNA-dependent protein kinase catalytic subunit
TVFGGLSGPATTQRPGLSPALGGPGVSR	Q8WWN8	ARAP3	Arf-GAP with Rho-GAP domain
TVETEAVQMLK	Q14738	PPP2R5D	Serine/threonine-protein phosphatase 2A 56 kDa regulatory subunit delta isoform
TVESAHVQR	P20711	DDC	Aromatic-L-amino-acid decarboxylase
TVELLSGVVDQTK	Q9UJS0	S2513	calcium-binding mitochondrial carrier protein Aralar2
TVASPGVTVEEAVEQIDIGGVTLLR	P31939	PUR9	bifunctional purine biosynthesis protein PURH
TTQIINITMTK	Q14980	NUMA1	Nuclear mitotic apparatus protein 1
TTLQVDTLNAELAAER	P35580	MYH10	Myosin-10
TTIENIQLPHTLLSR	P33991	MCM4	DNA replication licensing factor MCM4
TTHFVEGGDAGNREDQINR	P18124	RL7	60S ribosomal protein L7
TTFFHHEYPWILSASDDQTIR	P53621	COPA	coatomer subunit alpha
TTETQVLVASAQK	P12081	HARS1	histidine--tRNA ligase, cytoplasmic
TTETQVFVATPQK	P49590	HARS2	Histidine--tRNA ligase, mitochondrial
TTAQVLIR	P15121	ALDR	aldose reductase
TSVQFQNFSPTVVHPGDLQTQLAVQTK	O95782	AP2A1	AP-2 complex subunit alpha-1
TSVLAAANPIESQWNPK	P33991	MCM4	DNA replication licensing factor MCM4
TSTVDLPIENQLLWQIDR	P34932	HSPA4	Heat shock 70 kDa protein 4
TSTSQAVFR	P14868	SYDC	aspartate--tRNA ligase, cytoplasmic
TSRPENAIIYNNNEDFQVGQAK	P29401	TKT	transketolase
TSQNSELNNMQDLVEDYKK	P35908	KRT2	Keratin, type II cytoskeletal 2 epidermal
TSQNSELNNMQDLVEDYK	P35908	KRT2	Keratin, type II cytoskeletal 2 epidermal
TSQLNVGTSTDVSLK	Q14315	FLNC	filamin-C
TSPDAFVQLALQLAHYK	P50416	CPT1A	Carnitine O-palmitoyltransferase 1, liver isoform
TSLMNQYVNK	P51149	RAB7A	ras-related protein Rab-7a
TSITQQPSK	Q9NYY3	PLK2	Serine/threonine-protein kinase PLK2
TSIDAYDNFDNISLAQR	Q00610	CLH1	clathrin heavy chain 1
TSIAIDTIINQK	P25705	ATPA	ATP synthase subunit alpha, mitochondrial
TSGNQDEILVIR	Q05193	DYN1	dynamin-1
TSFFQALGITTK	P05388	RLA0	60S acidic ribosomal protein P0
TSDVNETQPPQSE	P35580	MYH10	Myosin-10
TRPVVAAGAVGLAQR	P11310	ACADM	medium-chain specific acyl-CoA dehydrogenase, mitochondrial
TRLEQEIATYR	P02533	KRT14	Keratin, type I cytoskeletal 14
TQYSSAMLESLLPGIR	P55786	PSA	puromycin-sensitive aminopeptidase
TQVVAGTNYYIK	P01040	CSTA	Cystatin-A
TQVDAQLQVVR	Q5VTR2	BRE1A	E3 ubiquitin-protein ligase BRE1A
TQVAGGQLSFK	P46060	RANGAP1	Ran GTPase-activating protein 1
TQSSLVPALTDFVR	O60888	CUTA	protein CutA
TQRPADVIFATVR	P33993	MCM7	DNA replication licensing factor MCM7
TQNPMVTGTSVLGVK	P28070	PSMB4	Proteasome subunit beta type-4
TQLVSNLK	P00505	AATM	aspartate aminotransferase, mitochondrial
TQLQLDER	P53007	SLC25A1	Tricarboxylate transport protein, mitochondrial
TQLLQDVQDENK	Q86UP2	KTN1	kinectin
TQLEELEDELQATEDAK	P35579	MYH9	Myosin-9
TQILAASYELHK	Q01082	SPTB2	spectrin beta chain, non-erythrocytic 1
TQIDHYVGIAR	O95197	RTN3	reticulon-3
TQGVSTTDLVGR	Q99447	PCYT2	Ethanolamine-phosphate cytidylyltransferase
TQGVPAVLK	P51610	HCFC1	host cell factor 1
TQFVSPWK	O00203	AP3B1	AP-3 complex subunit beta-1
TQADLDSLVR	Q7Z4W1	DCXR	L-xylulose reductase
TPYGASIFQSK	Q04726	TLE3	transducin-like enhancer protein 3
TPVVQNAASIVQPSPAHVGQQGLSK	Q8WXI9	GATAD2B	Transcriptional repressor p66-beta
TPQDPSSVLK	P36915	GNL1	guanine nucleotide-binding protein-like 1
TPNGVVLAPVQLGK	Q14204	DYHC1	cytoplasmic dynein 1 heavy chain 1
TPMENIGLQDSLLSR	P25205	MCM3	DNA replication licensing factor MCM3
TPLLLMLGQEDR	P13798	ACPH	acylamino-acid-releasing enzyme
TPGPGAQSALR	P62263	RS14	40S ribosomal protein S14
TPFLLVGTQIDLR	P60953	CDC42	cell division control protein 42 homolog
TPEAVQK	P49327	FAS	fatty acid synthase
TPAQYDASELK	P07355	ANXA2	annexin A2
TPAQFDADELR	P04083	ANXA1	annexin A1
TNVLGHLQQGGAPTPFDR	P17858	PFKAL	6-phosphofructokinase, liver type
TNVIQSLLAR	Q9NTJ5	SAC1	phosphatidylinositide phosphatase SAC1
TNSTFNQVVLK	Q07020	RL18	60S ribosomal protein L18
TNQELQEINR	P07355	ANXA2	annexin A2
TNNPLPLEQR	Q9UIA9	XPO7	exportin-7
TNLDESDVQPVK	Q9Y3I0	RTCB	tRNA-splicing ligase RtcB homolog
TNIFQIQR	Q7Z6Z7	HUWE1	E3 ubiquitin-protein ligase HUWE1
TNEQMHQLVAAYK	P08133	ANXA6	annexin A6
TMQTLLSLVR	P00492	HPRT	hypoxanthine-guanine phosphoribosyltransferase
TMQNLEIELQSQLSMK	P02533	KRT14	Keratin, type I cytoskeletal 14
TMLYTPQEMK	Q9Y265	RUVB1	ruvB-like 1
TMIQSPSGVILQEAADVHAR	P15924	DSP	Desmoplakin
TLYNNQPIDFLK	Q13867	BLMH	bleomycin hydrolase
TLVTQNSGVEALIHAILR	P14923	PLAK	junction plakoglobin
TLTPDQWAR	Q9H3K6	BOLA2	BolA-like protein 2
TLTGTAALTVQSQEDNLR	P09960	LKHA4	leukotriene A-4 hydrolase
TLTEGDSPGSQ	P49447	CY561	cytochrome b561
TLTDELAALQITGVK	Q8NBQ5	HSD17B11	Estradiol 17-beta-dehydrogenase 11
TLSYLLPAIVHINHQPFLER	P17844	DDX5	Probable ATP-dependent RNA helicase DDX5
TLSDYNIQK	P62979	RPS27A	Ubiquitin-ribosomal protein eS31 fusion protein
TLRDPSLPLLELQDIMTSVSGR	Q13085	ACACA	acetyl-CoA carboxylase 1
TLQLEYR	Q99829	CPNE1	copine-1
TLQLALDLVSSR	P53618	COPB1	Coatomer subunit beta
TLQIFNIEMK	Q00610	CLTC	Clathrin heavy chain 1
TLQEVTQLSQEAQR	P40939	ECHA	trifunctional enzyme subunit alpha, mitochondrial
TLQALQIPAAK	P46940	IQGA1	ras GTPase-activating-like protein IQGAP1
TLPGSDWTPNAQFITR	P56192	SYMC	methionine--tRNA ligase, cytoplasmic
TLLADQGEIR	O94776	MTA2	metastasis-associated protein MTA2
TLIEAGLPQK	O43390	HNRPR	heterogeneous nuclear ribonucleoprotein R
TLHTTASNWLHLIPQTLSHLK	Q14204	DYNC1H1	Cytoplasmic dynein 1 heavy chain 1
TLHPDLGTDKDKEQWK	P00338	LDHA	L-lactate dehydrogenase A chain
TLEVVSPSQSVTGSAGHTPYYQSPTDEK	P46821	MAP1B	microtubule-associated protein 1B
TLESSIQGLR	Q92747	ARC1A	actin-related protein 2/3 complex subunit 1A
TLDFDALSVGQR	Q14195	DPYL3	dihydropyrimidinase-related protein 3
TLAYLLPAIVHINHQPYLER	Q92841	DDX17	Probable ATP-dependent RNA helicase DDX17
TLAQLNPESSLFIIASK	P06744	GPI	Glucose-6-phosphate isomerase
TLAESALQLLYTAK	Q9Y490	TLN1	Talin-1
TKPYIQVDIGGGQTK	P11021	BIP	78 kDa glucose-regulated protein
TKDGQILPVPNVVVR	Q9P258	RCC2	Protein RCC2
TIWGVLGLGAFGFQLK	O95861	BPNT1	3'(2'),5'-bisphosphate nucleotidase 1
TIVITSHPGQIVK	P31689	DNJA1	dnaJ homolog subfamily A member 1
TIVAVEVQDQK	Q12756	KIF1A	kinesin-like protein KIF1A
TITGFQTHTTPVLLAHGER	Q13200	PSMD2	26S proteasome non-ATPase regulatory subunit 2
TISQHQISTSIITSTQK	P03915	MT-ND5	NADH-ubiquinone oxidoreductase chain 5
TINEVENQILTR	O43707	ACTN4	alpha-actinin-4
TILSNQTVDIPENVDITLK	P32969	RL9	60S ribosomal protein L9
TILQHLSEAWR	Q6P2Q9	PRP8	pre-mRNA-processing-splicing factor 8
TILPAAAQDVYYR	P04843	RPN1	dolichyl-diphosphooligosaccharide--protein glycosyltransferase subunit 1
TILEEEITPTIQK	O95347	SMC2	structural maintenance of chromosomes protein 2
TIISYIDEQFER	Q15019	SEPTIN2	septin-2
TIISLDTSQMNR	O00116	ADAS	Alkyldihydroxyacetonephosphate synthase
TIIQNPTDQQK	Q9UQ80	PA2G4	proliferation-associated protein 2G4
TIFQGIAAK	P52209	6PGD	6-phosphogluconate dehydrogenase, decarboxylating
TIDDLKNQILNLTTDNANILLQIDNAR	P13645	KRT1	Keratin, type I cytoskeletal 10
TIAQDYGVLK	Q06830	PRDX1	peroxiredoxin-1
THYIVGYNLPSYEYLYNLGDQYALK	P04843	RPN1	dolichyl-diphosphooligosaccharide--protein glycosyltransferase subunit 1
THTQDAVPLTLGQEFSGYVQQVK	P07954	FUMH	fumarate hydratase, mitochondrial
THPSVVPGSIAFSLPQR	P46459	NSF	Vesicle-fusing ATPase
THPQWYPAR	Q9NZ01	TECR	very-long-chain enoyl-CoA reductase
THLSLSHNPEQK	P11586	MTHFD1	C-1-tetrahydrofolate synthase, cytoplasmic
THLPGFVEQAEALK	P30044	PRDX5	peroxiredoxin-5, mitochondrial
THFTHSQFIVVSLK	O95347	SMC2	structural maintenance of chromosomes protein 2
THEAQIQEMR	P35579	MYH9	myosin-9
TGYTLDVTTGQR	O43390	HNRPR	heterogeneous nuclear ribonucleoprotein R
TGTQYLLR	P35237	SPB6	serpin B6
TGSPGSPGAGGVQSTAK	O43237	DYNC1LI2	Cytoplasmic dynein 1 light intermediate chain 2
TGQEYKPGNPPAEIGQNISSNSSASILESK	P07814	SYEP	bifunctional glutamate/proline--tRNA ligase
TGQEVVFVAEPDNK	P04844	RPN2	dolichyl-diphosphooligosaccharide--protein glycosyltransferase subunit 2
TGQEIPVNVR	Q96KP4	CNDP2	cytosolic non-specific dipeptidase
TGQAAELGGLLK	O00231	PSD11	26S proteasome non-ATPase regulatory subunit 11
TGPFAEHSNQLWNISAVPSWSK	Q15257	PTPA	serine/threonine-protein phosphatase 2A activator
TGNQHFGYLYGR	Q8TAT6	NPL4	nuclear protein localization protein 4 homolog
TGNFQVTELGR	O75643	SNRNP200	U5 small nuclear ribonucleoprotein 200 kDa helicase
TGLIDYNQLALTAR	P34897	GLYM	serine hydroxymethyltransferase, mitochondrial
TGGYLTESGYVNLQR	Q9H0D6	XRN2	5'-3' exoribonuclease 2
TGGMAFHSYFMEAIAPPLLQELK	P49327	FAS	fatty acid synthase
TGFFEFQAAK	Q9P2J5	SYLC	leucine--tRNA ligase, cytoplasmic
TGDLGDINAEQLPGR	Q9Y263	PLAP	phospholipase A-2-activating protein
TGDFQLHTNVNDGTEFGGSIYQK	P45880	VDAC2	voltage-dependent anion-selective channel protein 2
TGAQELLR	P06396	GSN	Gelsolin (AGEL) (Actin-depolymerizing factor) (ADF) (Brevin)
TFTTQETITNAETAK	P06744	GPI	Glucose-6-phosphate isomerase
TFSYAGFEMQPK	Q99832	TCPH	T-complex protein 1 subunit eta
TFQLQLLSPSSSIVPAFNTGTITQVIK	O43747	AP1G1	AP-1 complex subunit gamma-1
TFPLDVGSIVGYSGQK	P48147	PPCE	prolyl endopeptidase
TFLTLSLQDMASR	Q9UNS2	COPS3	COP9 signalosome complex subunit 3
TFLQTVSSEK	Q96EL3	RM53	39S ribosomal protein L53, mitochondrial
TFLQDLAR	O14681	EI24	etoposide-induced protein 2.4 homolog
TFITQQGIK	Q96CW1	AP2M1	AP-2 complex subunit mu
TFIGPGGNMPGYLRPETAQGIFLNFK	P41250	GARS	glycine--tRNA ligase
TFIAIKPDGVQR	P15531	NDKA	nucleoside diphosphate kinase A
TFHIFYQLLSGAGEHLK	P35580	MYH10	myosin-10
TFEGVDPQTTSMR	P31150	GDIA	rab GDP dissociation inhibitor alpha
TESAVSQMQSVIELGR	P41252	SYIC	isoleucine--tRNA ligase, cytoplasmic
TEQGPQVDETQFK	P05091	ALDH2	aldehyde dehydrogenase, mitochondrial
TEQGGAHFSVSSLAEGSVTSVGSVNPAENFR	P13010	XRCC5	X-ray repair cross-complementing protein 5
TEPTAQQNLALQLAEK	Q99613	EIF3C	eukaryotic translation initiation factor 3 subunit C
TELSQSDMFDQR	P62495	ETF1	Eukaryotic peptide chain release factor subunit 1
TELEDTLDSTAAQQELR	P35579	MYH9	myosin-9
TEGSLEDWDIAVQK	Q15020	SART3	squamous cell carcinoma antigen recognized by T-cells 3
TEEALQLYNQIIK	O76094	SRP72	Signal recognition particle subunit SRP72
TEEADLLQTK	O95347	SMC2	structural maintenance of chromosomes protein 2
TEALTQAFR	Q9Y230	RUVB2	ruvB-like 2
TEAESWYQTK	P13647	KRT5	Keratin, type II cytoskeletal 5
TDSSPNQAR	P26599	PTBP1	Polypyrimidine tract-binding protein 1
TDSQDLVASFR	Q15291	RBBP5	retinoblastoma-binding protein 5
TDMFQTVDLFEGK	Q01995	TAGLN	Transgelin
TDLVPAFQNLMK	P30153	2AAA	serine/threonine-protein phosphatase 2A 65 kDa regulatory subunit A alpha isoform
TDLNPDNLQGGDDLDPNYVLSSR	P12277	KCRB	creatine kinase B-type
TDDEVVQREEEAIQLDGLNASQIR	P14625	HSP90B1	Endoplasmin
TDDEVVQR	P14625	HSP90B1	Endoplasmin
TDAGGEDAILQTR	Q9NT62	ATG3	ubiquitin-like-conjugating enzyme ATG3
TAWGQQPDLAANEAQLLR	Q9UNM6	PSD13	26S proteasome non-ATPase regulatory subunit 13
TATVYPEPQNK	P48163	MAOX	NADP-dependent malic enzyme
TATQLAVNK	Q99832	TCPH	T-complex protein 1 subunit eta
TATPQQAQEVHEK	P60174	TPIS	triosephosphate isomerase
TATFAISILQQIELDLK	P60842	EIF4A1	Eukaryotic initiation factor 4A-I
TAQIMFQAYGDK	Q13085	ACACA	acetyl-CoA carboxylase 1
TAQEVETYR	P17844	DDX5	Probable ATP-dependent RNA helicase DDX5
TAPYVVTGSVDQTVK	P43034	LIS1	platelet-activating factor acetylhydrolase IB subunit alpha
TALQEEIK	P46940	IQGA1	ras GTPase-activating-like protein IQGAP1
TALPAQSAATLPAR	Q01082	SPTB2	spectrin beta chain, non-erythrocytic 1
TALALAIAQELGSK	Q9Y265	RUVB1	ruvB-like 1
TAIHEVMEQGR	P25205	MCM3	DNA replication licensing factor MCM3
TAFQEALDAAGDK	P10599	THIO	thioredoxin
TAEGQALSEAR	Q7L099	RUFY3	protein RUFY3
TAEAQLAYELQGAR	Q14254	FLOT2	flotillin-2
TAAELLQSQGSQAGGSQTLK	Q14141	SEPTIN6	septin-6
SYQPFALSPDPIIPQNVIHFILK	A6NKG5	RTL1	retrotransposon-like protein 1
SYNDELQFLEK	Q9Y3I0	RTCB	tRNA-splicing ligase RtcB homolog
SYLTEQVNQDLPK	Q16822	PCK2	Phosphoenolpyruvate carboxykinase [GTP], mitochondrial
SYLAQFAAR	P78344	IF4G2	eukaryotic translation initiation factor 4 gamma 2
SYELPDGQVITIGNER	P60709	ACTB	actin, cytoplasmic 1
SWVIDQK	Q9NTK5	OLA1	Obg-like ATPase 1
SWLSYSYQSR	Q15393	SF3B3	splicing factor 3B subunit 3
SVYGGEFIQQLK	Q9NQG5	RPRD1B	Regulation of nuclear pre-mRNA domain-containing protein 1B
SVVEFLQGYIGVPHGGFPEPFR	P11498	PC	Pyruvate carboxylase, mitochondrial
SVTEQGAELSNEER	P63104	1433Z	14-3-3 protein zeta/delta
SVSTPSEAGSQDSGDGAVGSR	Q13409	DC1I2	cytoplasmic dynein 1 intermediate chain 2
SVSLTGAPESVQK	Q92945	FUBP2	far upstream element-binding protein 2
SVPHLQK	P07355	ANXA2	Annexin A2
SVNESLNNLFITEEDYQALR	Q00610	CLH1	clathrin heavy chain 1
SVLGQLGITK	P01009	SERPINA1	Alpha-1-antitrypsin
SVLGGQDQLR	Q9BV38	WDR18	WD repeat-containing protein 18
SVLAETEGILQK	Q86UP2	KTN1	kinectin
SVKPQILSVFGDIALAIGGEFK	Q14974	KPNB1	Importin subunit beta-1
SVIEQGGIQTVDQLIK	Q8WUM4	PDC6I	programmed cell death 6-interacting protein
SVGNTIDPVILFQK	P46821	MAP1B	microtubule-associated protein 1B
SVGELPSTVESLQK	Q07065	CKAP4	cytoskeleton-associated protein 4
SVAQYTGGIAK	Q10713	MPPA	mitochondrial-processing peptidase subunit alpha
STYEQVDLIGK	Q9NR30	DDX21	nucleolar RNA helicase 2
STVTLSWKPVQK	Q9BZZ5	API5	Apoptosis inhibitor 5
STVLQQQYNR	Q9Y490	TLN1	Talin-1
STVAQLVK	P25705	ATP5F1A	ATP synthase subunit alpha, mitochondrial
STTSTIESFAAQEK	O95232	LC7L3	luc7-like protein 3
STQAATQVVLNVPETR	O75439	FLNB	Filamin-B
STPVNVPISQK	Q8WUM4	PDC6I	programmed cell death 6-interacting protein
STLQTLPEIVAK	O95202	LETM1	LETM1 and EF-hand domain-containing protein 1, mitochondrial
STLLFGQR	P33176	KINH	kinesin-1 heavy chain
STGSATSLASQGER	Q5SW79	CE170	centrosomal protein of 170 kDalpha
STGNFLTLTQAIDK	Q9P2J5	SYLC	leucine--tRNA ligase, cytoplasmic
STGEAFVQFASQEIAEK	P31943	HNRH1	heterogeneous nuclear ribonucleoprotein H
STGEAFVQFASK	P31942	HNRH3	heterogeneous nuclear ribonucleoprotein H3
STESLQANVQR	P26373	RL13	60S ribosomal protein L13
SSYDVFQLEFNDGAYNIK	Q16658	FSCN1	fascin
SSTQMTWGALFR	Q9HAV4	XPO5	exportin-5
SSQTSGTNEQSSAIVSAR	O60763	USO1	General vesicular transport factor p115
SSQALLSQLYQSPNR	P26378	ELAVL4	ELAV-like protein 4
SSPQFGVTLLTYELLQR	Q9UJS0	S2513	calcium-binding mitochondrial carrier protein Aralar2
SSLSSAQADFNQLAELDR	Q13813	SPTN1	spectrin alpha chain, non-erythrocytic 1
SSHSTWPVDVSQIK	Q6P2E9	EDC4 HEDLS	Enhancer of mRNA-decapping protein 4
SSGPYGGGGQYFAKPR	P09651	ROA1	heterogeneous nuclear ribonucleoprotein A1
SSFYVNGLTLGGQK	P07737	PROF1	profilin-1
SSEQILATLK	Q9UMS4	PRP19	pre-mRNA-processing factor 19
SSAQDPQAVLGALGR	P26640	VARS1	Valine--tRNA ligase
SSALVIQSYIR	O43795	MYO1B	unconventional myosin-Ib
SSAEVIAQAR	Q16555	DPYSL2	Dihydropyrimidinase-related protein 2
SRFWYFVSQLKK	Q02543	RPL18A	Large ribosomal subunit protein eL20
SQYEQLAEQNRK	P13645	KRT10	Keratin, type I cytoskeletal 10
SQYEQLAEQNR	P13645	KRT10	Keratin, type I cytoskeletal 10
SQWSPALTISK	P62837	UBE2D2	Ubiquitin-conjugating enzyme E2 D2
SQWLDVK	P21266	GSTM3	glutathione S-transferase Mu 3
SQVFSTAADGQTQVEIK	P38646	GRP75	stress-70 protein, mitochondrial
SQNVMAAASIANIVK	P17987	TCPA	T-complex protein 1 subunit alpha
SQNIVTDSSSLSAEAIR	Q01082	SPTB2	spectrin beta chain, non-erythrocytic 1
SQNFDILQSAISK	Q9NXF1	TEX10	testis-expressed sequence 10 protein
SQLNSQSVEITK	O60763	USO1	General vesicular transport factor p115
SQLLGSAHEVQR	Q13813	SPTN1	spectrin alpha chain, non-erythrocytic 1
SQLEAIFLR	Q8IV08	PLD3	phospholipase D3
SQLDIIIHSLK	P13010	XRCC5	X-ray repair cross-complementing protein 5
SQIVIAAWYR	O43795	MYO1B	Unconventional myosin-Ib
SQILFALVFTTR	O43731	KDELR3	ER lumen protein-retaining receptor 3
SQIHDIVLVGGSTR	P11142	HSPA8	heat shock cognate 71 kDa protein
SQIFSTASDNQPTVTIK	P11021	BIP	78 kDa glucose-regulated protein
SQGMALSLGDK	P53618	COPB	coatomer subunit beta
SQGLSQLYHNQSQGLLSQLQGQSK	P78344	IF4G2	eukaryotic translation initiation factor 4 gamma 2
SQGKPIELTPLPLLK	Q16537	2A5E	serine/threonine-protein phosphatase 2A 56 kDa regulatory subunit epsilon isoform
SQGGEPTYNVAVGR	P35080	PROF2	profilin-2
SQEQILEILR	P12270	TPR	nucleoprotein TPR
SQDIYLR	Q07020	RL18	60S ribosomal protein L18
SQDAEVGDGTTSVTLLAAEFLK	Q99832	TCPH	T-complex protein 1 subunit eta
SQAPGQPGASQWGSR	Q96EP5	DAZP1	DAZ-associated protein 1
SPYQEFTDHLVK	P15880	RPS2	Small ribosomal subunit protein uS5
SPYLYPLYGLGELPQGFAR	P31150	GDIA	rab GDP dissociation inhibitor alpha
SPSDSSTASTPVAEQIER	Q16643	DREB	drebrin
SPSAQLMEQVAQLK	Q14203	DCTN1	Dynactin subunit 1
SPQMVSAIVR	P35222	CTNB1	catenin beta-1
SPPGQVTEAVK	P15121	ALDR	aldose reductase
SPPDQPAVPHPPPSTPIK	P35611	ADDA	alpha-adducin
SPLVMDVLNIQGVQR	Q14204	DYHC1	cytoplasmic dynein 1 heavy chain 1
SPLVAAMQHFLPVLK	O95373	IPO7	importin-7
SPILLGSLAHQIYR	P31937	HIBADH	3-hydroxyisobutyrate dehydrogenase, mitochondrial
SPGADLLQVLTK	Q3LXA3	TKFC	bifunctional ATP-dependent dihydroxyacetone kinase/FAD-AMP lyase (cyclizing)
SPFEVQVSPEAGVQK	Q14315	FLNC	filamin-C
SPELPSPQAEK	Q9H078	CLPB	caseinolytic peptidase B protein homolog
SPEEGAETPVYLALLPPDAEGPHGQFVSEK	P16152	CBR1	carbonyl reductase [NADPH] 1
SPAQILIR	Q96JD6	AKR1E2	1,5-anhydro-D-fructose reductase (AF reductase)
SPAPPLLHVAALGQK	Q8N163	CCAR2	DBIRD complex subunit KIAA1967
SPALQILLTNTK	Q03426	KIME	mevalonate kinase
SPAGSIVHELNPNFQPPK	O43776	SYNC	asparagine--tRNA ligase, cytoplasmic
SPAGLQVLNDYLADK	P60174	TPIS	triosephosphate isomerase
SNVSDAVAQSTR	P60174	TPIS	triosephosphate isomerase
SNTSPEELGPLANQLTSDYGR	Q9Y490	TLN1	talin-1
SNTLPISLQSIR	P42704	LPPRC	leucine-rich PPR motif-containing protein, mitochondrial
SNQQLVDIIEK	P61289	PSME3	proteasome activator complex subunit 3
SNQQLENDLNLMDIK	P46940	IQGA1	ras GTPase-activating-like protein IQGAP1
SNPSVLQGLLR	Q5T4S7	UBR4	E3 ubiquitin-protein ligase UBR4 transferase UBR4
SNLGSVVLQLK	O43143	DHX15	putative pre-mRNA-splicing factor ATP-dependent RNA helicase DHX15
SNLAYDIVQLPTGLTGIK	P34932	HSP74	heat shock 70 kDa protein 4
SNIEETTISSQK	Q16352	INA	Alpha-internexin
SNEILTAIIQGMR	Q14974	KPNB1	Importin subunit beta-1
SLYYYIQQDTK	P07355	ANXA2	annexin A2
SLYQSAGVAPESFEYIEAHGTGTK	P49327	FAS	fatty acid synthase
SLYDEVAAQGEVVR	P07814	SYEP	bifunctional glutamate/proline--tRNA ligase
SLVQGELVTASK	P35611	ADDA	alpha-adducin
SLVQEMVGSFGK	O75643	SNRNP200	U5 small nuclear ribonucleoprotein 200 kDa helicase
SLTEYLQNVEQK	P33176	KINH	kinesin-1 heavy chain
SLSDNINLPQGVR	O43602	DCX	Neuronal migration protein doublecortin
SLQSVAEER	P61313	RL15	60S ribosomal protein L15
SLQSLLGPSSK	P57737	CORO7	Coronin-7
SLQQLAEER	Q13813	SPTN1	spectrin alpha chain, non-erythrocytic 1
SLQELFLAHILSPWGAEVK	P09874	PARP1	poly [ADP-ribose] polymerase 1
SLPVPQLVPETEDEK	O00154	ACH	Cytosolic acyl coenzyme A thioester hydrolase
SLPVEEQPK	Q6P2Q9	PRP8	pre-mRNA-processing-splicing factor 8
SLNNQFASFIDKVR	P04264	KRT1	Keratin, type II cytoskeletal 1
SLNNQFASFIDK	P04264	KRT1	Keratin, type II cytoskeletal 1
SLLVPSDFLSVHLSWLSAFPLSQPFSLHHPSR	Q8N163	CCAR2	DBIRD complex subunit KIAA1967
SLLQAWGLILR	Q9NU22	MDN1	midasin
SLLQALNEVK	Q14204	DYHC1	cytoplasmic dynein 1 heavy chain 1
SLKDEDVLQK	Q9NZ01	TECR	very-long-chain enoyl-CoA reductase
SLILTALQR	Q8TEX9	IPO4	Importin-4
SLGYAYVNFQQPADAER	P11940	PABPC1	Polyadenylate-binding protein 1
SLGVTQLAVAVNK	Q9Y450	HBS1L	HBS1-like protein
SLGPPQGEEDSVPR	P78527	PRKDC	DNA-dependent protein kinase catalytic subunit
SLFEQYGK	Q9BQ04	RBM4B	RNA-binding protein 4B
SLFDQAESSYR	P29692	EF1D	elongation factor 1-delta
SLETENSALQLQVTER	P20700	LMNB1	Lamin-B1
SLEQNIQLPAALLSR	P33993	MCM7	DNA replication licensing factor MCM7
SLEGTEAQVFK	Q13045	FLII	Protein flightless-1 homolog
SLEDALAEAQR	O95347	SMC2	structural maintenance of chromosomes protein 2
SLDQDPVVR	Q92598	HS105	heat shock protein 105 kDa
SLDIQVPNFPADETK	P47897	QARS1	Glutamine--tRNA ligase
SLAEDFAEQPIK	Q9Y4L1	HYOU1	hypoxia up-regulated protein 1
SKVDQIQEIVTGNPTVIK	P46940	IQGAP1	Ras GTPase-activating-like protein IQGAP1
SKVDEAVAVLQAHQAK	P11940	PABPC1	Polyadenylate-binding protein 1
SKLEDIANAALAASAVTQVAK	Q8WVM8	SCFD1	Sec1 family domain-containing protein 1
SKDIFDQLAK	P25205	MCM3	DNA replication licensing factor MCM3
SKAEAESLYQSK	P04264	KRT1	Keratin, type II cytoskeletal 1
SIVIRPLEPQPAPHLAR	Q15029	EFTUD2	116 kDa U5 small nuclear ribonucleoprotein component
SIQLDGLVWGASK	P29692	EF1D	elongation factor 1-delta
SIQADGLVWGSSK	P24534	EF1B	elongation factor 1-beta
SINPDEAVAYGAAVQAAILSGDK	P11142	HSPA8	heat shock cognate 71 kDa protein
SINDNIAIFTEVQK	Q07065	CKAP4	cytoskeleton-associated protein 4
SILEQLAEK	P27708	CAD	Multifunctional protein CAD
SIEEQLGTEIKPIPSNIDK	P26196	DDX6	probable ATP-dependent RNA helicase DDX6
SIEALLEAGQAR	Q9P2E9	RRBP1	Ribosome-binding protein 1
SHYVLYGLVAAMQPR	Q13200	PSMD2	26S proteasome non-ATPase regulatory subunit 2
SHGLFGLNENQLR	Q96H79	ZC3HAV1L	Zinc finger CCCH-type antiviral protein 1-like
SHAVFQIILR	O00139	KIF2A	Kinesin-like protein KIF2A
SHAVFNIIFTQK	Q12756	KIF1A	kinesin-like protein KIF1A
SGYQALPWVR	Q9BXS5	AP1M1	AP-1 complex subunit mu-1
SGYHQSASEHGLVVIAPDTSPR	P10768	ESD	S-formylglutathione hydrolase
SGTYLQGTFR	Q9Y2L1	RRP44	exosome complex exonuclease RRP44
SGTVDPQELQK	P30626	SORCN	sorcin
SGPFGQIFRPDNFVFGQSGAGNNWAK	P04350	TBB4A	tubulin beta-4A chain
SGGPVVVLVQLER	O75643	SNRNP200	U5 small nuclear ribonucleoprotein 200 kDa helicase
SGGGGDIHQGFQSLLTEVNK	P35237	SPB6	serpin B6
SGGGFSSGSAGIINYQR	P04264	KRT1	Keratin, type II cytoskeletal 1
SGDITYGQFAQLYR	P19174	PLCG1	1-phosphatidylinositol 4,5-bisphosphate phosphodiesterase gamma-1
SGAFGHLFRPDNFIFGQSGAGNNWAK	Q13509	TBB3	tubulin beta-3 chain
SFQQSSLSR	P43243	MATR3	Matrin-3
SFLSQGQVLK	P48047	ATP5PO	ATP synthase subunit O, mitochondrial
SFLFQLLK	Q00535	CDK5	cyclin-dependent kinase 5
SFEWLSQMR	Q14204	DYNC1H1	Cytoplasmic dynein 1 heavy chain 1
SFEQISANITK	P08237	PFKAM	6-phosphofructokinase, muscle type
SEVSSDEDIQFR	P40939	ECHA	trifunctional enzyme subunit alpha, mitochondrial
SESPKEPEQLR	P09651	ROA1	heterogeneous nuclear ribonucleoprotein A1
SESEVEEAAAIIAQRPDNPR	Q16643	DREB	drebrin
SEQFINLR	P07384	CAN1	calpain-1 catalytic subunit
SEQEFQEQLESAR	Q96RQ3	MCCC1	Methylcrotonoyl-CoA carboxylase subunit alpha, mitochondrial
SEPPVSEQLDVAGR	Q6VY07	PACS1	phosphofurin acidic cluster sorting protein 1
SEMEVQDAELK	Q9UQ80	PA2G4	proliferation-associated protein 2G4
SELLVEQGR	Q92878	RAD50	DNA repair protein RAD50
SEKNQLLAIASSLFVAFQLR	P05165	PCCA	Propionyl-CoA carboxylase alpha chain, mitochondrial
SEEQLKEEGIEYK	P09622	DLDH	dihydrolipoyl dehydrogenase, mitochondrial
SEDYVELVQR	O60568	PLOD3	Multifunctional procollagen lysine hydroxylase and glycosyltransferase LH3
SEDYVDIVQGR	Q02809	PLOD1	procollagen-lysine,2-oxoglutarate 5-dioxygenase 1
SDVASVNWSAPSQAFPR	Q9BTW9	TBCD	tubulin-specific chaperone D
SDSFENPVLQQHFR	P12956	XRCC6	X-ray repair cross-complementing protein 6
SDQWKPLNLEEK	Q04637	EIF4G1	Eukaryotic translation initiation factor 4 gamma 1
SDQNLQTALELTR	O95373	IPO7	importin-7
SDQDYILK	Q9UQ80	PA2G4	proliferation-associated protein 2G4
SDMNTVLNYIFSHAQVTK	Q13085	ACACA	acetyl-CoA carboxylase 1
SAVGFEYQGK	Q14247	SRC8	src substrate cortactin
SAVGFDYQGK	Q14247	SRC8	src substrate cortactin
SAVDAGFLQK	P09172	DOPO	dopamine beta-hydroxylase
SATLLQLITK	O00429	DNM1L	dynamin-1-like protein
SAPAQAPTSGADLSAHLWAR	Q9H857	NT5D2	5'-nucleotidase domain-containing protein 2
SAGQGEVLVYVEDPAGHQEEAK	P21333	FLNA	Filamin-A
SAFPHLQDAQVK	O14980	XPO1	exportin-1
SADTLWGIQK	P00338	LDHA	L-lactate dehydrogenase A chain
SADTLWDIQK	P07195	LDHB	L-lactate dehydrogenase B chain
SADESGQALLAAGHYASDEVR	Q13813	SPTN1	spectrin alpha chain, non-erythrocytic 1
SAADLISQAR	Q14195	DPYL3	dihydropyrimidinase-related protein 3
RWLPAGDALLQMITIHLPSPVTAQK	P13639	EF2	elongation factor 2
RVENSIPAAGETQNVEVAAGPAGK	Q15020	SART3	squamous cell carcinoma antigen recognized by T-cells 3
RQQEQQVPILEK	P49327	FAS	fatty acid synthase
RQLEEAEEEAQR	P35579	MYH9	Myosin-9
RPTPQDSPIFLPVDDTSFR	P49327	FAS	fatty acid synthase
RPTFVPQWYVQQMK	Q7Z2W4	ZCCHV	zinc finger CCCH-type antiviral protein 1
RPTELLSNPQFIVDGATR	P07384	CAN1	calpain-1 catalytic subunit
RPSTSQTVSTPAPVPVIESTEAIEAK	P12270	TPR	nucleoprotein TPR
RPLILQLIFSK	P50570	DYN2	dynamin-2
RPLIDQVVQTALSETQDPEEVSVTVK	Q00610	CLH1	clathrin heavy chain 1
RPELLTHSTTEVTQPR	P78347	GTF2I	General transcription factor II-I
RPEGPGAQAPSSPR	P40222	TXLNA	alpha-taxilin
RPDVVENQPDAASQLNVDASGNLAK	Q9NZL9	MAT2B	methionine adenosyltransferase 2 subunit beta
RPANQFVPR	P67870	CSK2B	casein kinase II subunit beta
RNVQALEIELQSQLALK	P13645	KRT10	Keratin, type I cytoskeletal 10
RNEFLGELQK	Q14141	SEPTIN6	septin-6
RLHGLDEEAEQK	P33991	MCM4	DNA replication licensing factor MCM4
RIVSQLLTLMDGLK	P55072	TERA	transitional endoplasmic reticulum ATPase
RIPVQAVWAGWGHASENPK	Q13085	ACACA	Acetyl-CoA carboxylase 1
RHVFGESDELIGQK	P60174	TPIS	triosephosphate isomerase
RHEILQWVLQTDSQQ	Q96AG4	LRC59	leucine-rich repeat-containing protein 59
RGQPFWLTLHFEGR	P21980	TGM2	protein-glutamine gamma-glutamyltransferase 2
RGDIIGVQGNPGK	Q15046	SYK	lysine--tRNA ligase
RFELYFQGPSSNKPR	P33993	MCM7	DNA replication licensing factor MCM7
RFDDAVVQSDMK	P11142	HSPA8	heat shock cognate 71 kDa protein
REPWLLPSQHNDIIR	Q14697	GANAB	neutral alpha-glucosidase AB
REELITNWEQIR	Q13813	SPTN1	spectrin alpha chain, non-erythrocytic 1
RAEDGSVIDYELIDQDAR	P07355	ANXA2	annexin A2
QYQIDAAIVR	Q13620	CUL4B	Cullin-4B
QYPLVTPNEER	P35606	COPB2	coatomer subunit beta'
QYNIVGLHTNIDFLLNLSGHPEFEAGNVHTDFIPQHHK	Q96RQ3	MCCA	methylcrotonoyl-CoA carboxylase subunit alpha, mitochondrial
QYGNEVFLAK	P50990	TCPQ	T-complex protein 1 subunit theta
QYASLTGTQALPPLFSLGYHQSR	Q14697	GANAB	neutral alpha-glucosidase AB
QWNVNWEIK	Q96AC1	FERM2	fermitin family homolog 2
QVVQGLLSETYLEAHR	P33993	MCM7	DNA replication licensing factor MCM7
QVVNIPSFIVR	P46781	RS9	40S ribosomal protein S9
QVVNFGPGPAK	Q9Y617	SERC	phosphoserine aminotransferase
QVVESAYEVIK	P00338	LDHA	L-lactate dehydrogenase A chain
QVVEEPSPQLPADK	P52564	MP2K6	dual specificity mitogen-activated protein kinase kinase 6
QVTQLAIDTEER	Q04637	EIF4G1	Eukaryotic translation initiation factor 4 gamma 1
QVTITGSAASISLAQYLINAR	Q15365	PCBP1	poly(rC)-binding protein 1
QVSDLISVLR	P17844	DDX5	probable ATP-dependent RNA helicase DDX5
QVSAAASVVSQALHDLLQHVR	Q9Y4G6	TLN2	talin-2
QVQIDGLVVLK	O15372	EIF3H	eukaryotic translation initiation factor 3 subunit H
QVQAEVPGSPIFVMR	Q13085	ACACA	acetyl-CoA carboxylase 1
QVPVDVVEMK	P55884	EIF3B	eukaryotic translation initiation factor 3 subunit B
QVNYEVDR	Q13085	ACACA	acetyl-CoA carboxylase 1
QVLLSAAEAAEVILR	P78371	CCT2	T-complex protein 1 subunit beta
QVLIASHLPSYELR	Q13085	ACACA	acetyl-CoA carboxylase 1
QVLFSADDR	P09972	ALDOC	fructose-bisphosphate aldolase C
QVLEPSFR	P26641	EF1G	elongation factor 1-gamma
QVLDNLTMEK	P35527	K1C9	keratin, type I cytoskeletal 9
QVLALQSQLADTK	P35580	MYH10	myosin-10
QVKPYVEEGLHPQIIIR	Q99832	CCT7	T-complex protein 1 subunit eta
QVISLQTK	P52701	MSH6	DNA mismatch repair protein Msh6
QVIQGLEALK	Q9NTJ5	SAC1	phosphatidylinositide phosphatase SAC1
QVIINLINQK	Q9NTJ5	SAC1	phosphatidylinositide phosphatase SAC1
QVIGTGSFFPK	Q13642	FHL1	four and a half LIM domains protein 1
QVGYENAGTVEFLVDR	P11498	PC	Pyruvate carboxylase, mitochondrial
QVGVGYVDSIQR	P43246	MSH2	DNA mismatch repair protein Msh2
QVFGQTTIHQHIPFNWDSEFVQLHFGK	Q9UJS0	S2513	calcium-binding mitochondrial carrier protein Aralar2
QVFFELNGQLR	P11498	PC	Pyruvate carboxylase, mitochondrial
QVEVELLSR	Q96G23	CERS2	ceramide synthase 2
QVENAGAIGPSR	Q9UHD8	SEPTIN9	septin-9
QVEDDIQQLLK	P35998	PRS7	26S protease regulatory subunit 7
QTYSTEPNNLK	P46779	RL28	60S ribosomal protein L28
QTVEFLGFVVTPK	A6NKG5	RTL1	retrotransposon-like protein 1
QTVAVGVIK	P68104	EEF1A1	Elongation factor 1-alpha 1
QTTVSNSQQAYQEAFEISK	P31946	1433B	14-3-3 protein beta/alpha
QTTSNLGHLNKPSIQALIHGLNR	O00487	PSDE	26S proteasome non-ATPase regulatory subunit 14
QTQTFTTYSDNQPGVLIQVYEGER	P11142	HSPA8	heat shock cognate 71 kDa protein
QTLQSEQPLQVAR	P35998	PRS7	26S protease regulatory subunit 7
QTLLLASR	A6NKG5	RTL1	retrotransposon-like protein 1
QTIDNSQGAYQEAFDISKK	P27348	1433T	14-3-3 protein theta
QTIDNSQGAYQEAFDISK	P27348	1433T	14-3-3 protein theta
QTGEGVGPQEYTLLK	Q9P2J5	SYLC	leucine--tRNA ligase, cytoplasmic
QTFLLQTTK	O94776	MTA2	metastasis-associated protein MTA2
QTESTSFLEK	P60900	PSA6	proteasome subunit alpha type-6
QTDVGITHFR	Q6P2Q9	PRP8	pre-mRNA-processing-splicing factor 8
QTASVTLQAIAAQNAAVQAVNAHSNILK	Q16891	MIC60	mitochondrial inner membrane protein
QTALVELVK	P02768	ALB	Albumin
QSVEADINGLRR	P13645	KRT10	Keratin, type I cytoskeletal 10
QSVEADINGLR	P13645	KRT10	Keratin, type I cytoskeletal 10
QSNPLLIHVDTK	P48147	PPCE	prolyl endopeptidase
QSMWSLLTALSGK	Q15003	CND2	condensin complex subunit 2
QSLTMDPVVK	P34932	HSP74	heat shock 70 kDa protein 4
QSLPPGLAVK	P63173	RPL38	Large ribosomal subunit protein eL38
QSLGELIGTLNAAK	P60174	TPIS	triosephosphate isomerase
QSLEASLAETEGR	P13645	KRT10	Keratin, type I cytoskeletal 10
QSIINPDWNFEK	P46459	NSF	vesicle-fusing ATPase
QSHTLPFPPPPALPFYPASAYPR	Q9NZB2	F120A	constitutive coactivator of PPAR-gamma-like protein 1
QSGESIDIITR	Q16531	DDB1	DNA damage-binding protein 1
QSGEAFVELGSEDDVK	P52597	HNRPF	heterogeneous nuclear ribonucleoprotein F
QSEDLGSQFTEIFIK	O60763	USO1	General vesicular transport factor p115
QSDVMIVAGTLTNK	O75251	NDUS7	NADH dehydrogenase [ubiquinone] iron-sulfur protein 7, mitochondrial
QQYLQSIEER	P21912	SDHB	succinate dehydrogenase [ubiquinone] iron-sulfur subunit, mitochondrial
QQVPSGESAILDR	P09874	PARP1	poly [ADP-ribose] polymerase 1
QQSELQSQVR	Q14847	LASP1	LIM and SH3 domain protein 1
QQQVEAVELEAK	Q86UP2	KTN1	kinectin
QQQPPPETFDFK	Q14203	DCTN1	Dynactin subunit 1
QQQLLNEENLR	Q9NVI7	ATD3A	ATPase family AAA domain-containing protein 3A
QQQFNVQALVAVGDHASK	P14868	DARS1	Aspartate--tRNA ligase, cytoplasmic
QQQDEAYLASLR	Q96CS3	FAF2	FAS-associated factor 2
QQPTQFINPETPGYVGFANLPNQVHR	Q15019	SEPTIN2	septin-2
QQPLFVSGGDDYK	P53621	COPA	coatomer subunit alpha
QQNELAELHANLAR	Q14980	NUMA1	nuclear mitotic apparatus protein 1
QQLLIGAYAK	Q99832	TCPH	T-complex protein 1 subunit eta
QQLEAVNEAIK	O95347	SMC2	structural maintenance of chromosomes protein 2
QQISLATQMVR	P48643	TCPE	T-complex protein 1 subunit epsilon
QQIQSIQQSIER	P55769	NH2L1	NHP2-like protein 1
QQHVIETLIGK	P48643	TCPE	T-complex protein 1 subunit epsilon
QQGLASYDYVR	Q15149	PLEC	plectin
QQEQQVPILEK	P49327	FAS	fatty acid synthase
QQANTIFWSPQGQFVVLAGLR	P55884	EIF3B	eukaryotic translation initiation factor 3 subunit B
QQALTVSTDPEHR	P35606	COPB2	coatomer subunit beta'
QPYAVSELAGHQTSAESWGTGR	P36578	RL4	60S ribosomal protein L4
QPVVDTFDIR	Q86X55	CARM1	Histone-arginine methyltransferase CARM1
QPVLSQTEAR	P28070	PSB4	proteasome subunit beta type-4
QPSQGPTFGIK	P11586	C1TC	C-1-tetrahydrofolate synthase, cytoplasmic
QPLLGPPESMR	Q99613	EIF3C	Eukaryotic translation initiation factor 3 subunit C
QPGNETADTVLK	P61758	PFD3	prefoldin subunit 3
QPGITFIAAK	P07339	CATD	cathepsin D preproprotein
QPEWLEEQQGR	Q14980	NUMA1	nuclear mitotic apparatus protein 1
QPAIISQLDPVNER	Q08211	DHX9	ATP-dependent RNA helicase A
QPAENVNQYLTDPK	P22314	UBA1	Ubiquitin-like modifier-activating enzyme 1
QNRPIPQWIR	Q59GN2	RPL39P5	Putative ribosomal protein eL39-like 5
QNPFWWTHQR	Q6P2Q9	PRP8	pre-mRNA-processing-splicing factor 8
QNLLSQSHAYQQFLR	Q01082	SPTBN1	Spectrin beta chain, non-erythrocytic 1
QNLFTTWSHHLQQANIQFR	Q14204	DYHC1	cytoplasmic dynein 1 heavy chain 1
QNLEPLFEQYINNLR	P02538	KRT6A	Keratin, type II cytoskeletal 6A
QNLDALLNQLK	Q14204	DYHC1	cytoplasmic dynein 1 heavy chain 1
QNINLSAPIMSR	Q14566	MCM6	DNA replication licensing factor MCM6
QMVETELK	P62258	1433E	14-3-3 protein epsilon
QMSLLLR	P25705	ATPA	ATP synthase subunit alpha, mitochondrial
QMLPLNTNIR	O14980	XPO1	exportin-1
QMEQVAQFLK	Q01995	TAGL	transgelin
QMEQISQFLQAAER	P37802	TAGLN2	transgelin-2
QLYHLGVVEAYSGLTK	Q08211	DHX9	ATP-dependent RNA helicase A
QLVDTTVELANK	O75533	SF3B1	splicing factor 3B subunit 1
QLVAEQVTYQR	P49736	MCM2	DNA replication licensing factor MCM2
QLTQPETHFGR	Q9UJU6	DBNL	drebrin-like protein
QLTFEEIAK	Q9UNM6	PSD13	26S proteasome non-ATPase regulatory subunit 13
QLSSGVSEIR	P04792	HSPB1	heat shock protein beta-1
QLSSEELEQFQK	P41252	SYIC	isoleucine--tRNA ligase, cytoplasmic
QLSEVFIQLPSR	P51532	SMARCA4	Transcription activator BRG1
QLSDAISIIGR	P55060	XPO2	exportin-2
QLQSEQPQTAAAR	Q9UI12	VATH	V-type proton ATPase subunit H
QLQQAQAAGAEQEVEK	P39748	FEN1	flap endonuclease 1
QLQNISLAAASGGAK	Q14204	DYHC1	cytoplasmic dynein 1 heavy chain 1
QLQNIIQATSR	P15924	DSP	Desmoplakin
QLQDIATLADQR	O95373	IPO7	importin-7
QLQAETEPIVK	P60228	EIF3E	eukaryotic translation initiation factor 3 subunit E
QLPLVKPYLR	Q00610	CLH1	clathrin heavy chain 1
QLLTLSSELSQAR	P15311	EZR	Ezrin
QLLQLLTTYIVR	Q5T4S7	UBR4	E3 ubiquitin-protein ligase UBR4
QLLQANPILESFGNAK	P35580	MYH10	myosin-10
QLLQANPILEAFGNAK	P35579	MYH9	Myosin-9
QLLLTADDR	P04075	ALDOA	fructose-bisphosphate aldolase A
QLLHNFPPDQLTSSGAPFWSGPK	P22314	UBA1	Ubiquitin-like modifier-activating enzyme 1
QLLDFSQK	O14980	XPO1	exportin-1
QLLDDEEQLTAK	Q9BSJ8	ESYT1	extended synaptotagmin-1
QLLAGGIAGAVSR	Q6NUK1	SCMC1	calcium-binding mitochondrial carrier protein SCaMC-1
QLIVGVNK	P68104	EEF1A1	Elongation factor 1-alpha 1
QLFLGGVDR	P12235	SLC25A4	Solute carrier family 25 member 4
QLFHPEQLITGK	P68366	TUBA4A	Tubulin alpha-4A chain
QLFDQVVK	P35241	RADI	radixin
QLEPVYNSLAK	P13667	PDIA4	protein disulfide-isomerase A4
QLENSLNEFGEK	P26639	SYTC	threonine--tRNA ligase, cytoplasmic
QLEEAEEEAQR	P35579	MYH9	myosin-9
QLEAIDQLHLEYAK	O43707	ACTN4	alpha-actinin-4
QLDSIVGER	P13647	KRT5	Keratin, type II cytoskeletal 5
QLDDLKVELSQLR	P42766	RL35	60S ribosomal protein L35
QLASGLLLVTGPLVLNR	Q02878	RL6	60S ribosomal protein L6
QLASEDISHITPTQGFNIK	P36405	ARL3 ARFL3	ADP-ribosylation factor-like protein 3
QLAPIWDK	P07237	PDIA1	protein disulfide-isomerase
QLALWNPK	Q9ULV4	COR1C	coronin-1C
QLAGEDMEISVK	P07384	CAPN1	Calpain-1 catalytic subunit
QLAELAISK	P35606	COPB2	coatomer subunit beta'
QLAEDFLR	Q92841	DDX17	Probable ATP-dependent RNA helicase DDX17
QLAEDFLK	P17844	DDX5	probable ATP-dependent RNA helicase DDX5
QKPSNTEDFIEDIVK	P46063	RECQ1	ATP-dependent DNA helicase Q1
QKEGAAAPQPK	Q96CC6	RHBDF1	Inactive rhomboid protein 1
QKDYETATLSEIK	P12814	ACTN1	alpha-actinin-1
QKADEAYLIGR	P11498	PC	Pyruvate carboxylase, mitochondrial
QIYPPINVLPSLSR	P21281	VATB2	V-type proton ATPase subunit B, brain isoform
QIWQNLGLDDTK	P49588	SYAC	alanine--tRNA ligase, cytoplasmic
QIVWNGPVGVFEWEAFAR	P00558	PGK1	Phosphoglycerate kinase 1
QITVNDLPVGR	P32119	PRDX2	peroxiredoxin-2
QITQSALLAEAR	P78527	PRKDC	DNA-dependent protein kinase catalytic subunit
QITLNDLPVGR	Q13162	PRDX4	peroxiredoxin-4
QISQAYEVLSDAK	P31689	DNAJA1	DnaJ homolog subfamily A member 1
QISNLQQSISDAEQR	P04264	KRT1	Keratin, type II cytoskeletal 1
QISGQYSGSPQLLK	Q96N67	DOCK7	dedicator of cytokinesis protein 7
QINWTVLYR	P83731	RL24	60S ribosomal protein L24
QINNIFLR	Q16537	PPP2R5E	Serine/threonine-protein phosphatase 2A 56 kDa regulatory subunit epsilon isoform
QINLSNIR	Q7KZF4	SND1	staphylococcal nuclease domain-containing protein 1
QINIHNLSAFYDSELFR	P49736	MCM2	DNA replication licensing factor MCM2
QINDIQLSR	Q13347	EIF3I	eukaryotic translation initiation factor 3 subunit I
QILGVIDK	Q14444	CAPR1	caprin-1
QIIVEEAK	Q9Y281	CFL2	Cofilin-2
QIGVEHVVVYVNK	P49411	EFTU	elongation factor Tu, mitochondrial
QIGNVAALPGIVHR	Q9Y3I0	RTCB	tRNA-splicing ligase RtcB homolog
QIGENLIVPGGVK	Q14194	DPYL1	dihydropyrimidinase-related protein 1
QIGENLIVPGGIK	O14531	DPYL4	dihydropyrimidinase-related protein 4
QIGDNLIVPGGVK	Q14195	DPYL3	dihydropyrimidinase-related protein 3
QIFNVNNLNLPQVALSFGFK	Q9NVP1	DDX18	ATP-dependent RNA helicase DDX18
QIFNGTFVK	P18124	RL7	60S ribosomal protein L7
QIFLGGVDKR	P05141	ADT2	ADP/ATP translocase 2
QIFLGGVDK	P05141	ADT2	ADP/ATP translocase 2
QIFILLFQR	P55060	XPO2	exportin-2
QIEELKGQEVSPK	P09936	UCHL1	ubiquitin carboxyl-terminal hydrolase isozyme L1
QIATLHAQVADMK	P35579	MYH9	myosin-9
QIALAVLSTELAVR	P27708	PYR1	CAD protein
QIAEEDFYEK	P33993	MCM7	DNA replication licensing factor MCM7
QIAASSQDSVGR	P54886	P5CS	delta-1-pyrroline-5-carboxylate synthase
QHYGFVLYR	P16278	BGAL	beta-galactosidase preproprotein
QHTFVETESVR	P48444	COPD	coatomer subunit delta
QHQLYVGVLGSK	O94760	DDAH1	N(G),N(G)-dimethylarginine dimethylaminohydrolase 1
QHLSSVVFIK	O43324	EEF1E1	Eukaryotic translation elongation factor 1 epsilon-1
QHLEITGGQVR	P47897	SYQ	glutamine--tRNA ligase
QHITLALEK	Q16891	MIC60	mitochondrial inner membrane protein
QHFISFDTDR	P30626	SRI	Sorcin
QHFFNQNFLLTAQSTPNNTVWK	Q9NPJ8	NXT2	NTF2-related export protein 2
QGYVLSSIEGR	O43684	BUB3	mitotic checkpoint protein BUB3
QGYVIYR	P61313	RL15	60S ribosomal protein L15
QGVQVQVSTSNISSLEGAR	P49327	FAS	fatty acid synthase
QGVLGIK	P23396	RPS3	Small ribosomal subunit protein uS3
QGVDADINGLR	P35527	K1C9	keratin, type I cytoskeletal 9
QGTYGGYFR	Q99613	EIF3C	Eukaryotic translation initiation factor 3 subunit C
QGTIFLAGPPLVK	Q9HCC0	MCCB	methylcrotonoyl-CoA carboxylase beta chain, mitochondrial
QGSGSGQSPSR	Q86YZ3	HRNR	Hornerin
QGSGSGQSPGHGQR	Q86YZ3	HRNR	Hornerin
QGQETAVAPSLVAPALNKPK	Q15691	MAPRE1	Microtubule-associated protein RP/EB family member 1
QGNMTAALQAALK	O15511	ARPC5	actin-related protein 2/3 complex subunit 5
QGNLSSQVPLKR	P78527	PRKDC	DNA-dependent protein kinase catalytic subunit
QGNLSSQVPLK	P78527	PRKDC	DNA-dependent protein kinase catalytic subunit
QGNLFDFLR	Q9H857	NT5DC2	5'-nucleotidase domain-containing protein 2
QGIQFYTQLK	Q02252	MMSA	methylmalonate-semialdehyde dehydrogenase [acylating], mitochondrial
QGGLGPMNIPLVSDPK	Q06830	PRDX1	peroxiredoxin-1
QGGGGGGGSVPGIER	P52272	HNRPM	heterogeneous nuclear ribonucleoprotein M
QGFISSLK	Q9Y6Y8	S23IP	SEC23-interacting protein
QGDEVSVHYDPMIAK	Q96RQ3	MCCA	methylcrotonoyl-CoA carboxylase subunit alpha, mitochondrial
QGANINEIR	Q15365	PCBP1	poly(rC)-binding protein 1
QGAFLVNAAR	P56545	CTBP2	C-terminal-binding protein 2
QFYINVER	P60842	IF4A1	eukaryotic initiation factor 4A-I
QFVVFEGNHYFYSPYPTK	P04843	ANXA1	Annexin A1
QFSSSYLSR	P35527	K1C9	keratin, type I cytoskeletal 9
QFQDAGHFDAENIK	Q13813	SPTN1	spectrin alpha chain, non-erythrocytic 1
QFLFRPWDVTK	P22314	UBA1	ubiquitin-like modifier-activating enzyme 1
QFLEVWEK	P13798	ACPH	acylamino-acid-releasing enzyme
QFINLMLPMK	P78527	PRKDC	DNA-dependent protein kinase catalytic subunit
QFIAAQGSSR	P07814	SYEP	bifunctional glutamate/proline--tRNA ligase
QFGAQANVIGPWIQTK	P12814	ACTN1	alpha-actinin-1
QFAYQNSWGLTTR	P07814	SYEP	bifunctional glutamate/proline--tRNA ligase
QFASQANVVGPWIQTK	O43707	ACTN4	alpha-actinin-4
QFAEMYVAK	P13639	EF2	elongation factor 2
QFAALVASK	Q99460	PSMD1	26S proteasome non-ATPase regulatory subunit 1
QEYVLTQQGFIYQGSAK	P21980	TGM2	protein-glutamine gamma-glutamyltransferase 2
QEYLDTLYR	P60228	EIF3E	eukaryotic translation initiation factor 3 subunit E
QEYEQLIAK	P35527	K1C9	keratin, type I cytoskeletal 9
QEYDESGPSIVHR	P60709	ACTB	actin, cytoplasmic 1
QEVISTSSK	P63244	RACK1	guanine nucleotide-binding protein subunit beta-2-like 1
QETEVELYNEFPEPIK	P51149	RAB7A	ras-related protein Rab-7a
QEPLLIGSTK	P49327	FAS	fatty acid synthase
QELSFAAR	P49327	FAS	fatty acid synthase
QELILSNSEDK	P53621	COPA	coatomer subunit alpha
QEISAAFK	P08758	ANXA5	annexin A5
QEGLESVLK	P14923	JUP	Junction plakoglobin
QEGIIFIGPPPSAIR	Q96RQ3	MCCA	methylcrotonoyl-CoA carboxylase subunit alpha, mitochondrial
QEGDTFYIK	P29373	RABP2	cellular retinoic acid-binding protein 2
QEESITVQTMMNTLR	Q12765	SCRN1	secernin-1
QEDVIATANLSR	Q9Y490	TLN1	talin-1
QDVYDLLK	Q99460	PSMD1	26S proteasome non-ATPase regulatory subunit 1
QDLTTALGLVK	Q92974	ARHG2	rho guanine nucleotide exchange factor 2
QDLPNAMNAAEITDK	P61204	ARF3	ADP-ribosylation factor 3
QDLPALEEKPR	P34932	HSP74	heat shock 70 kDa protein 4
QDLLNVLAR	Q96A33	CCD47	coiled-coil domain-containing protein 47
QDIAFAYQR	P07355	ANXA2	annexin A2
QDEVNAAWQR	Q13813	SPTN1	spectrin alpha chain, non-erythrocytic 1
QDAQVVLYR	P78527	PRKDC	DNA-dependent protein kinase catalytic subunit
QDAQSLHGDIPQK	Q9NR30	DDX21	nucleolar RNA helicase 2
QDAFLLSK	P52888	THOP1	thimet oligopeptidase
QAVTNPNNTFYATK	P38646	GRP75	stress-70 protein, mitochondrial
QAVPLFSK	Q9BZZ5	API5	apoptosis inhibitor 5
QAVPISVPR	Q96L92	SNX27	sorting nexin-27
QAVEQQIQSHR	P33176	KINH	kinesin-1 heavy chain
QAVDVSPLR	P46782	RS5	40S ribosomal protein S5
QAQQERDELADEIANSSGK	P35579	MYH9	myosin-9
QAQLAQTLQQQEQASQGLR	Q14980	NUMA1	nuclear mitotic apparatus protein 1
QAQIEVVPSASALIIK	P30050	RL12	60S ribosomal protein L12
QANTGLFNLR	P52888	THOP1	thimet oligopeptidase
QALVAIFTHLR	Q14204	DYHC1	cytoplasmic dynein 1 heavy chain 1
QALLQYK	Q02790	FKBP4	peptidyl-prolyl cis-trans isomerase FKBP4
QALEGLGDLK	P12081	HARS1	Histidine--tRNA ligase, cytoplasmic
QAITQVVVSR	Q9H9B4	SFXN1	sideroflexin-1
QAIGIALETR	Q99460	PSMD1	26S proteasome non-ATPase regulatory subunit 1
QAHTMDPQLR	P49327	FAS	fatty acid synthase
QAGVFEPTIVK	P17987	TCPA	T-complex protein 1 subunit alpha
QAGPASVPLR	P30101	PDIA3	protein disulfide-isomerase A3
QAGAEALSQAVAR	Q92616	GCN1	translational activator GCN1
QADVNLVNAK	O43175	SERA	D-3-phosphoglycerate dehydrogenase
QADNPHVALYQAR	Q9Y4L1	HYOU1	hypoxia up-regulated protein 1
QADLYISEGLHPR	P40227	TCPZ	T-complex protein 1 subunit zeta
QADFEAHNILR	P49915	GUAA	GMP synthase [glutamine-hydrolyzing]
QAASSLQQASLK	P38646	GRP75	stress-70 protein, mitochondrial
QAASGLVGQENAR	Q9Y265	RUVB1	ruvB-like 1
QAAASATQTIAAAQHAASTPK	Q9Y490	TLN1	talin-1
PYQYPALTPEQK	P04075	ALDOA	fructose-bisphosphate aldolase A
PQYQTWEEFSR	P49458	SRP09	signal recognition particle 9 kDa protein
PDYLGADQR	P35998	PRS7	26S protease regulatory subunit 7
PAYFQRPENALK	Q14152	EIF3A	eukaryotic translation initiation factor 3 subunit A
NYYEQWGK	P22626	ROA2	heterogeneous nuclear ribonucleoproteins A2/B11
NYPPWQHTTLSVLR	Q9P2J5	SYLC	leucine--tRNA ligase, cytoplasmic
NYPNTFWMNPQYLIK	P17655	CAN2	calpain-2 catalytic subunit
NYPDPVSIIQK	P41252	SYIC	isoleucine--tRNA ligase, cytoplasmic
NYPATFWVNPQFK	P07384	CAN1	calpain-1 catalytic subunit
NYIMDFQVGK	P09455	RET1	retinol-binding protein 1
NYGILADATEQVGQHK	Q9BZZ5	API5	apoptosis inhibitor 5
NYEASVDSLTFSVVTGPAPSQEAGTK	P21980	TGM2	protein-glutamine gamma-glutamyltransferase 2
NWVVTGADDMQIR	P35606	COPB2	coatomer subunit beta'
NVSLGNVLAVAYATQR	Q9NY33	DPP3	Dipeptidyl peptidase 3
NVQLTENEIR	P62136	PP1A	serine/threonine-protein phosphatase PP1-alpha catalytic subunit
NVQLSLLTER	P49959	MRE11	double-strand break repair protein MRE11A
NVQLQENEIR	P36873	PP1G	serine/threonine-protein phosphatase PP1-gamma catalytic subunit
NVQGIIEILK	P42704	LPPRC	leucine-rich PPR motif-containing protein, mitochondrial
NVQDAIADAEQR	P35908	KRT2	Keratin, type II cytoskeletal 2 epidermal
NVQALEIELQSQLALK	P13645	KRT10	Keratin, type I cytoskeletal 10
NVNVQNFHISWK	O43707	ACTN4	alpha-actinin-4
NVNIQNFHISWK	P12814	ACTN1	alpha-actinin-1
NVLLDPQLVPGGGASEMAVAHALTEK	P49368	TCPG	T-complex protein 1 subunit gamma
NVIVLQTVLQEVR	Q9Y2L1	RRP44	exosome complex exonuclease RRP44
NVIIWGNHSSTQYPDVNHAK	P40925	MDHC	malate dehydrogenase, cytoplasmic
NVIGLQMGTNR	P37802	TAGLN2	transgelin-2
NVIFQPVAELK	Q01813	PFKAP	6-phosphofructokinase type C
NVEGQDMLYQSLK	P63010	AP2B1	AP-2 complex subunit beta
NVEDLSGGELQR	P61221	ABCE1	ATP-binding cassette sub-family E member 1
NVDLSTFYQNR	O94826	TOM70	mitochondrial import receptor subunit TOM70
NVDLLSDMVQEHDEPILK	P55209	NP1L1	nucleosome assembly protein 1-like 1
NTNAAEESLPEIQK	Q9NTJ3	SMC4	structural maintenance of chromosomes protein 4
NTLLIAGLQAR	P39656	OST48	dolichyl-diphosphooligosaccharide--protein glycosyltransferase 48 kDa subunit
NTALETLHQNSITQVSIYEVDK	Q92747	ARC1A	actin-related protein 2/3 complex subunit 1A
NSYVAGQYDDAASYQR	P11413	G6PD	glucose-6-phosphate 1-dehydrogenase
NSVSQISVLSGGK	O15143	ARC1B	actin-related protein 2/3 complex subunit 1B
NSDSILEAIQK	P19404	NDUV2	NADH dehydrogenase [ubiquinone] flavoprotein 2, mitochondrial
NSAFESLYQDK	O75643	SNRNP200	U5 small nuclear ribonucleoprotein 200 kDa helicase
NQYDNDVTVWSPQGR	P25786	PSA1	proteasome subunit alpha type-1
NQWIDNVEK	P18206	VINC	vinculin isoform meta-VCL
NQVAMNPTNTVFDAK	P11142	HSPA8	heat shock cognate 71 kDa protein
NQVALNPQNTVFDAK	P0DMV9	HS71B	heat shock 70 kDa protein 1A/1B
NQSQGYNQWQQGQFWGQKPWSQHYHQGYY	Q00839	HNRPU	heterogeneous nuclear ribonucleoprotein U
NQLTSNPENTVFDAK	P11021	BIP	78 kDa glucose-regulated protein
NQLNPIGSLQELAIHHGWR	O75569	PRKRA	interferon-inducible double stranded RNA-dependent protein kinase activator A
NQLLAIASSLFVAFQLR	P05165	PCCA	Propionyl-CoA carboxylase alpha chain, mitochondrial
NQILNLTTDNANILLQIDNAR	P13645	KRT10	Keratin, type I cytoskeletal 10
NQGGYGGSSSSSSYGSGR	P09651	ROA1	heterogeneous nuclear ribonucleoprotein A1
NQELLQSQLTEK	O60763	USO1	General vesicular transport factor p115
NQDLAPNSAEQASILSLVTK	Q12905	ILF2	interleukin enhancer-binding factor 2
NQALNTDNYGHDLASVQALQR	Q13813	SPTN1	spectrin alpha chain, non-erythrocytic 1
NPSTVEAFDLAQSNSEHSR	O15067	PUR4	phosphoribosylformylglycinamidine synthase
NPSTNFQEPVQPLTQQQVAQMQLK	P19623	SPEE	spermidine synthase
NPQSYLYLVK	O00159	MYO1C	unconventional myosin-Ic
NPPAFTELQLPR	Q6L8Q7	PDE12	2',5'-phosphodiesterase 12 (2'-PDE) (2-PDE)
NPELQNLLLDDFFK	P52209	6PGD	6-phosphogluconate dehydrogenase, decarboxylating
NPDDITQEEYGEFYK	P08238	HS90B	heat shock protein HSP 90-beta
NNVNVASLTQSEIR	Q6P2Q9	PRP8	pre-mRNA-processing-splicing factor 8
NNTVGLIQLNRPK	P30084	ECHM	enoyl-CoA hydratase, mitochondrial
NNRPSEGPLQTR	Q00610	CLTC	Clathrin heavy chain 1
NNQFQALLQYADPVSAQHAK	P26599	PTBP1	polypyrimidine tract-binding protein 1
NNIIQTWR	P41250	GARS	glycine--tRNA ligase
NNFSDTGNFGFGIQEHIDLGIK	P62913	RL11	60S ribosomal protein L11
NNAYLAQSPQLYK	P14868	SYDC	aspartate--tRNA ligase, cytoplasmic
NMVPQQALVIR	P05023	AT1A1	sodium/potassium-transporting ATPase subunit alpha-1
NMQDMVEDYR	P04264	KRT1	Keratin, type II cytoskeletal 1
NMQDLVEDLK	P04259	KRT6B	Keratin, type II cytoskeletal 6B
NMITQYWPDR	O95373	IPO7	importin-7
NMDPLNDNVATLLHQSSDR	P35580	MYH10	myosin-10
NMDPLNDNIATLLHQSSDK	P35579	MYH9	myosin-9
NMAEQIIQEIYSQIQSK	P29401	TKT	Transketolase
NLVDNITGQR	Q15149	PLEC	plectin
NLSLSGHVGFDSLPDQLVNK	Q9NVA2	SEPTIN11	septin-11
NLQYYDISAK	P62826	RAN	GTP-binding nuclear protein Ran
NLQNLLILTAIK	Q00610	CLH1	clathrin heavy chain 1
NLQEVLGEEK	P54577	SYYC	tyrosine--tRNA ligase, cytoplasmic
NLQDLVR	O14617	AP3D1	AP-3 complex subunit delta-1
NLPPEEQMISALPDIK	O15355	PPM1G	protein phosphatase 1G
NLMNAVVQTVK	P35221	CTNA1	catenin alpha-1
NLLQVDLTK	P17612	KAPCA	cAMP-dependent protein kinase catalytic subunit alpha
NLLHSLQSSGIGSK	Q92616	GCN1	Stalled ribosome sensor GCN1
NLHQSNFSLSGAQIDDNNPR	Q14194	DPYL1	dihydropyrimidinase-related protein 1
NLHQSGFSLSGTQVDEGVR	Q14195	DPYL3	dihydropyrimidinase-related protein 3
NLHQSGFSLSGAQIDDNIPR	Q16555	DPYL2	dihydropyrimidinase-related protein 2
NLGSINTELQDVQR	O75396	SC22B	vesicle-trafficking protein SEC22b
NLGQNLWGPHR	Q9P258	RCC2	protein RCC2
NLEGYVGFANLPNQVYR	Q16181	SEPTIN7	septin-7
NLDFQDVLDK	Q9Y3I0	RTCB	tRNA-splicing ligase RtcB homolog
NLAPFFEAWAWPIQK	Q9Y4C2	TCAF1	TRPM8 channel-associated factor 1
NKLNDLEDALQQAK	P04264	KRT1	Keratin, type II cytoskeletal 1
NKLEGLEDALQK	P02538	KRT6A	Keratin, type II cytoskeletal 6A
NKEPPAPAQQLQPQPVAVQGPEPAR	Q9HC07	TM165	transmembrane protein 165
NKDQGTYEDYVEGLR	P60660	MYL6	myosin light polypeptide 6
NIYVLQELDNPGAK	P12956	XRCC6	X-ray repair cross-complementing protein 6
NISFTVWDVGGQDK	P61204	ARF3	ADP-ribosylation factor 3
NINLIVQK	P63010	AP2B1	AP-2 complex subunit beta
NILLTNEQLESAR	Q9H9B4	SFXN1	sideroflexin-1
NIEMTQEDVR	O75643	SNRNP200	U5 small nuclear ribonucleoprotein 200 kDa helicase
NIEDVIAQGIGK	P05387	RLA2	60S acidic ribosomal protein P2
NIAIQSQFTR	P12270	TPR	nucleoprotein TPR
NHQSAAEYNIFEGMELR	Q14195	DPYL3	dihydropyrimidinase-related protein 3
NHKEEMSQLTGQNSGDVNVEINVAPGK	P35527	K1C9	keratin, type I cytoskeletal 9
NHEAQIQDMR	P35580	MYH10	myosin-10
NGQLAASVETAGDSELFLMK	Q16658	FSCN1	fascin
NGPALQEAYVR	Q9UJU6	DBNL	drebrin-like protein
NGGQILIADLR	P55735	SEC13	protein SEC13 homolog
NGEAVPEDEQISAK	O60282	KIF5C	kinesin heavy chainC
NFYQEHPDLAR	P17844	DDX5	probable ATP-dependent RNA helicase DDX5
NFTTEQVTAMLLSK	P34932	HSP74	heat shock 70 kDa protein 4
NFSDNQLQEGK	P37802	TAGLN2	transgelin-2
NFPNAIEHTLQWAR	P22314	UBA1	ubiquitin-like modifier-activating enzyme 1
NFINNPLAQADWAAK	P35579	MYH9	myosin-9
NFILDQTNVSAAAQR	Q00839	HNRPU	heterogeneous nuclear ribonucleoprotein U
NFGIGQDIQPK	P62424	RL7A	60S ribosomal protein L7a
NFGDQPDIR	Q15393	SF3B3	splicing factor 3B subunit 3
NEQDAYAINSYTR	P24752	THIL	acetyl-CoA acetyltransferase, mitochondrial
NELEIPGQYDGR	P78527	PRKDC	DNA-dependent protein kinase catalytic subunit
NEFGEIQGDK	P21980	TGM2	protein-glutamine gamma-glutamyltransferase 2
NEEDAAELVALAQAVNAR	P22314	UBA1	ubiquitin-like modifier-activating enzyme 1
NDGAAILAAVSSIAQK	P28331	NDUS1	NADH-ubiquinone oxidoreductase 75 kDa subunit, mitochondrial
NDFTEEEEAQVR	P63208	SKP1	S-phase kinase-associated protein 1
NDFQLIGIQDGYLSLLQDSGEVR	P63241	IF5A1	eukaryotic translation initiation factor 5A-1
NAVTQEFGPVPDTAR	Q99798	ACON	aconitate hydratase, mitochondrial
NAVITVPAYFNDSQR	P38646	GRP75	stress-70 protein, mitochondrial
NAQMAQSPILLLGGAASTLLQNR	A1L0T0	HACL2	acetolactate synthase-like protein
NALLQLTDSQIADVAR	O75643	SNRNP200	U5 small nuclear ribonucleoprotein 200 kDa helicase
NAGNEQDLGIQYK	P35221	CTNA1	catenin alpha-1
NAEAVLQSPGLSGK	Q13045	FLII	protein flightless-1 homolog
NAAQVLVGIPLETGQK	Q9BT78	CSN4	COP9 signalosome complex subunit 4
NAAQFLLSTNDK	P63151	2ABA	serine/threonine-protein phosphatase 2A 55 kDa regulatory subunit B alpha isoform
MWFQWSEQR	O15260	SURF4	surfeit locus protein 4
MVVPGLDGAQIPR	P49327	FAS	fatty acid synthase
MVLAAAGGVEHQQLLDLAQK	P31930	QCR1	cytochrome b-c1 complex subunit 1, mitochondrial
MVIITGPPEAQFK	Q9Y6M1	IGF2BP1	Insulin-like growth factor 2 mRNA-binding protein 1
MSVQPTVSLGGFEITPPVVLR	P06748	NPM	nucleophosmin
MSSTFIGNSTAIQELFK	Q13509	TBB3	tubulin beta-3 chain
MQSTLISAAR	P43246	MSH2	DNA mismatch repair protein Msh2
MQLLEIITTEK	P40939	ECHA	trifunctional enzyme subunit alpha, mitochondrial
MLVVLLQGTR	P08133	ANXA6	annexin A6
MLVVLLQANR	P08758	ANXA5	annexin A5
MLTGPVYSQSTALTHK	Q86VP6	CAND1	cullin-associated NEDD8-dissociated protein 1
MLLADQGQSWK	P09211	GSTP1	glutathione S-transferase P
MLEQLDMR	O00148	DX39A	ATP-dependent RNA helicase DDX39A
MLATLEPEQR	P54886	P5CS	delta-1-pyrroline-5-carboxylate synthase
MILIQDGSQNTNVDKPLR	Q92945	KHSRP	Far upstream element-binding protein 2
MIEAVQNHIGSLNWGYR	Q16881	TRXR1	thioredoxin reductase 1, cytoplasmic
MIAGQVLDINLAAEPK	P07910	HNRPC	heterogeneous nuclear ribonucleoproteins C1/C2
MGLVDQLVEPLGPGLKPPEER	P40939	ECHA	trifunctional enzyme subunit alpha, mitochondrial
MFLYNLTLQR	Q15393	SF3B3	splicing factor 3B subunit 3
MFLGDNAHLSIINEYLSQSYQK	P46940	IQGA1	ras GTPase-activating-like protein IQGAP1
MEIQEIQLK	P09493	TPM1	tropomyosin alpha-1 chain
MEEANIQPNR	P42704	LPPRC	leucine-rich PPR motif-containing protein, mitochondrial
MDELQLFR	P55072	TERA	transitional endoplasmic reticulum ATPase
MAVTFIGNSTAIQELFK	P07437	TBB5	tubulin beta chain
MAPYQGPDAVPGALDYK	O43707	ACTN4	alpha-actinin-4
MAKPEEVLVVENDQGEVVR	O14980	XPO1	exportin-1
MAILQIMK	Q13263	TIF1B	transcription intermediary factor 1-beta
LYTLVLVLQPQR	P36639	8ODP	7,8-dihydro-8-oxoguanine triphosphatase
LYTLQDK	P49327	FASN	Fatty acid synthase
LYQYPNFAGPHAALANK	Q9BY44	EIF2A	eukaryotic translation initiation factor 2A
LYQVEYAFK	P60900	PSA6	proteasome subunit alpha type-6
LYQTDPSGTYHAWK	O14818	PSA7	proteasome subunit alpha type-7
LYQEMFAWK	Q14204	DYHC1	cytoplasmic dynein 1 heavy chain 1
LYPEGLAQLAR	P61421	VA0D1	V-type proton ATPase subunit d 1
LYLPVQNK	Q9Y6A4	CFA20	UPF0468 protein C16orf80
LYLIQMIPR	Q9H5Q4	TFB2M	dimethyladenosine transferase 2, mitochondrial
LYIYHVTGQGPPSLLLSK	Q658Y4	F91A1	protein FAM91A1
LYDNLLEQNLIR	O00231	PSD11	26S proteasome non-ATPase regulatory subunit 11
LYAVHQEGNK	P50990	TCPQ	T-complex protein 1 subunit theta
LWTLVSEQTR	P46776	RL27A	60S ribosomal protein L27a
LWDEVMQAVAR	Q9Y4C2	TCAF1	protein FAM115A
LVVENVDVLTQMR	Q9Y2A7	NCKP1	nck-associated protein 1
LVVDSHVQYR	Q6P2Q9	PRP8	pre-mRNA-processing-splicing factor 8
LVTLPVSFAQLK	Q96AG4	LRC59	leucine-rich repeat-containing protein 59
LVTDQNISENWR	P24666	PPAC	low molecular weight phosphotyrosine protein phosphatase
LVSVLQNK	P49588	SYAC	alanine--tRNA ligase, cytoplasmic
LVSQTGPVHAPIFTMSVEVDGNSFEASGPSK	Q12906	ILF3	interleukin enhancer-binding factor 3
LVSQDNFGFDLPAVEAATK	Q01082	SPTB2	spectrin beta chain, non-erythrocytic 1
LVSPETEASEESLQFNLEKPATGER	Q12888	TP53B	tumor suppressor p53-binding protein 1
LVRPPVQVYGIEGR	P48047	ATPO	ATP synthase subunit O, mitochondrial
LVQTPLTDR	Q14204	DYHC1	cytoplasmic dynein 1 heavy chain 1
LVQSPNSYFMDVK	P42677	RS27	40S ribosomal protein S27
LVQDVANNTNEEAGDGTTTATVLAR	P10809	CH60	60 kDa heat shock protein, mitochondrial
LVQASEELLR	Q13232	NDK3	nucleoside diphosphate kinase 3
LVQAFQYTDK	Q13162	PRDX4	peroxiredoxin-4
LVQAFQFTDK	Q06830	PRDX1	peroxiredoxin-1
LVQAAQMLQSDPYSVPAR	P18206	VINC	vinculin isoform meta-VCL
LVPLNQESVEER	Q8N1F7	NUP93	nuclear pore complex protein Nup93
LVNLQHLDLLNNK	Q96AG4	LRC59	leucine-rich repeat-containing protein 59
LVLYPSAQEK	Q6L8Q7	PDE12	2',5'-phosphodiesterase 12
LVLEVAQHLGESTVR	P06576	ATPB	ATP synthase subunit beta, mitochondrial
LVLEQVVTSIASVADTAEEK	O00410	IPO5	importin-5
LVKPGNQNTQVTEAWNK	Q9UQ80	PA2G4	proliferation-associated protein 2G4
LVINGNPITIFQER	P04406	G3P	glyceraldehyde-3-phosphate dehydrogenase
LVHLQTLVLNGNPLLHAQLR	Q13045	FLII	Protein flightless-1 homolog
LVGQSIIAYLQK	P53621	COPA	coatomer subunit alpha
LVGQGASAVLLDLPNSGGEAQAK	Q99714	HCD2	3-hydroxyacyl-CoA dehydrogenase type-2
LVELTQK	P42704	LRPPRC	Leucine-rich PPR motif-containing protein, mitochondrial
LVEIAQVPK	Q16851	UGPA	UTP--glucose-1-phosphate uridylyltransferase
LVEDHLAVQSLIR	Q02218	ODO1	2-oxoglutarate dehydrogenase, mitochondrial
LVAYSSDQAHSSVER	P20711	DDC	Aromatic-L-amino-acid decarboxylase
LVASAYSIAQK	O95861	BPNT1	3'(2'),5'-bisphosphate nucleotidase 1
LVAIVDVIDQNR	P50914	RL14	60S ribosomal protein L14
LTVTSLQETGLK	Q14315	FLNC	filamin-C
LTVSSLQESGLK	P21333	FLNA	filamin-A
LTVSQGNTSVQQDK	Q7Z4S6	KI21A	kinesin-like protein KIF21A
LTSTVMLWLQTNK	P47756	CAPZB	F-actin-capping protein subunit beta
LTSLVPFVDAFQLER	Q14152	EIF3A	Eukaryotic translation initiation factor 3 subunit A
LTQVLNTHYVAPR	P51532	SMARCA4	Transcription activator BRG1
LTQDQDVDVK	P30153	2AAA	serine/threonine-protein phosphatase 2A 65 kDa regulatory subunit A alpha isoform
LTQDEIISK	Q07866	KLC1	Kinesin light chain 1
LTPLQLEIQR	Q8N163	CCAR2	DBIRD complex subunit KIAA1967
LTPITYPQGLAMAK	P63000	RAC1	ras-related C3 botulinum toxin substrate 1
LTMQVSSLQR	P35659	DEK	protein DEK
LTLTFSAQTK	O60610	DIAP1	protein diaphanous homolog 1
LTLQPVDNSTISLQMGTNK	Q15417	CNN3	calponin-3
LTLHGLQQYYVK	O00148	DX39A	ATP-dependent RNA helicase DDX39A
LTIVSTVGFGDQINK	Q14141	SEPTIN6	septin-6
LTIVDTVGFGDQINK	Q9NVA2	SEPTIN11	septin-11
LTIQANLNR	Q9UKN8	TF3C4	general transcription factor 3C polypeptide 4
LTIAFQAK	O75534	CSDE1	Cold shock domain-containing protein E1
LTHYDHVLIELTQAGLK	Q14566	MCM6	DNA replication licensing factor MCM6
LTHVDSPLEAPAGPLGQVK	Q9BSJ8	ESYT1	extended synaptotagmin-1
LTGTIQNDILK	P22033	MUTA	methylmalonyl-CoA mutase, mitochondrial
LTFLVAQK	Q13085	ACACA	acetyl-CoA carboxylase 1
LTEQLAGPLR	P42285	MTREX	superkiller viralicidic activity 2-like 2
LTEMETLQSQLMAEK	P35579	MYH9	myosin-9
LTDQVMQNPR	Q99733	NP1L4	nucleosome assembly protein 1-like 4
LTDAQILTR	P35250	RFC2	replication factor C subunit 2
LTAQVASLTSELTTLNATIQQQDQELAGLK	Q14980	NUMA1	nuclear mitotic apparatus protein 1
LSVYAALQR	Q15149	PLEC	plectin
LSVVFGEHTLLVTVSGQR	Q0VGL1	LTOR4	ragulator complex protein LAMTOR4
LSVLGAITSVQQR	P62495	ERF1	eukaryotic peptide chain release factor subunit 1
LSVISVEDPPQR	P38117	ETFB	Electron transfer flavoprotein subunit beta
LSVADSQAEAK	Q92616	GCN1	translational activator GCN1
LSSQEAASSFGDDR	P05165	PCCA	Propionyl-CoA carboxylase alpha chain, mitochondrial
LSSLPFQK	P61970	NTF2	nuclear transport factor 2
LSQYQEPLHLPGVR	P05165	PCCA	Propionyl-CoA carboxylase alpha chain, mitochondrial
LSQNNFALGYK	Q9Y277	VDAC3	voltage-dependent anion-selective channel protein 3
LSQLEGVNVER	Q96QK1	VPS35	Vacuolar protein sorting-associated protein 35
LSQGVTLVVDR	P23919	KTHY	thymidylate kinase
LSPQAVNSIAK	P30626	SORCN	sorcin
LSPPYSSPQEFAQDVGR	Q13263	TIF1B	transcription intermediary factor 1-beta
LSPANQR	Q13263	TIF1B	transcription intermediary factor 1-beta
LSMSQLNEK	Q08211	DHX9	ATP-dependent RNA helicase A
LSLSNAISTALPLTQLR	Q14204	DYHC1	cytoplasmic dynein 1 heavy chain 1
LSLQEQDAAIVK	Q9Y6D9	MD1L1	mitotic spindle assembly checkpoint protein MAD1
LSLPQNETVADTTLTK	Q9HC35	EMAL4	echinoderm microtubule-associated protein-like 4
LSLDDLLQR	P27708	PYR1	CAD protein
LSFQHDPETSVLVLR	Q14697	GANAB	neutral alpha-glucosidase AB
LSEQELQFR	Q16891	MIC60	mitochondrial inner membrane protein
LSDLLAPISEQIK	Q01518	CAP1	adenylyl cyclase-associated protein 1
LSDGIGVMLPQVLK	P52701	MSH6	DNA mismatch repair protein Msh6
LSDDNTIGKEEIQQR	Q13813	SPTN1	spectrin alpha chain, non-erythrocytic 1
LSDADLAGPLQK	Q15021	CND1	condensin complex subunit 1
LSANQQNILK	P57088	TMM33	transmembrane protein 33
LSALLQETK	O60763	USO1	General vesicular transport factor p115
LREDENAEPVGTTYQK	Q16643	DREB	drebrin
LQYFMEQFYGIIR	P78527	PRKDC	DNA-dependent protein kinase catalytic subunit
LQWDLGLGHLPR	Q5JTH9	RRP12	RRP12-like protein
LQVWDTAGQER	P51153	RAB13	ras-related protein Rab-13
LQVVDQPLPVR	P49327	FAS	fatty acid synthase
LQVTNVLSQPLTQATVK	P04844	RPN2	dolichyl-diphosphooligosaccharide--protein glycosyltransferase subunit 2
LQVLLTYR	Q9H4A4	AMPB	aminopeptidase B
LQVELDNVTGLLSQSDSK	P35579	MYH9	myosin-9
LQVEHTVTEEITDVDLVHAQIHVAEGR	P11498	PC	Pyruvate carboxylase, mitochondrial
LQVAGEITTGPR	O75746	S2512	calcium-binding mitochondrial carrier protein Aralar1
LQTSSVLVSGLR	P22314	UBA1	ubiquitin-like modifier-activating enzyme 1
LQTQVFK	P46781	RS9	40S ribosomal protein S9
LQTASDESYKDPTNIQLSK	Q13813	SPTN1	spectrin alpha chain, non-erythrocytic 1
LQSTFVFEEIGR	P51659	DHB4	peroxisomal multifunctional enzyme type 2
LQSSQEPEAPPPR	Q9UNF1	MAGD2	melanoma-associated antigen D2
LQSSNIFTVAK	Q10567	AP1B1	AP-1 complex subunit beta-1
LQSSDLGVK	Q7L099	RUFY3	protein RUFY3
LQSQLLSIEK	Q05193	DYN1	dynamin-1
LQSIGTENTEENR	P04075	ALDOA	fructose-bisphosphate aldolase A
LQSEPESIR	P09496	CLCA	clathrin light chain A
LQQVLTGLR	Q9BTW9	TBCD	tubulin-specific chaperone D
LQQVLQMESHIQSTSDR	Q14974	IMB1	importin subunit beta-1
LQQQLTQAQETLK	Q9Y4P3	TBL2	transducin beta-like protein 2
LQQLPADFGR	Q96AG4	LRC59	leucine-rich repeat-containing protein 59
LQQLGEAHQAETEVLR	Q14980	NUMA1	nuclear mitotic apparatus protein 1
LQQIFIELTLK	O43795	MYO1B	Unconventional myosin-Ib
LQQELDDLTVDLDHQR	P35580	MYH10	myosin-10
LQQELDDLLVDLDHQR	P35579	MYH9	myosin-9
LQPFATEADVEEALR	P33992	MCM5	DNA replication licensing factor MCM5
LQNTGVADGYPVR	Q8WX93	PALLD	palladin
LQNNNVYTIAK	P63010	AP2B1	AP-2 complex subunit beta
LQNELDNVSTLLEEAEKK	P35580	MYH10	myosin-10
LQMEAPHIIVGTPGR	P60842	IF4A1	eukaryotic initiation factor 4A-I
LQLSVYTTTR	Q96KA5	CLP1L	cleft lip and palate transmembrane protein 1-like protein
LQLPVWEYK	O43143	DHX15	putative pre-mRNA-splicing factor ATP-dependent RNA helicase DHX15
LQLNGNLQLELAQVLAQERPK	P49327	FASN	Fatty acid synthase
LQLEIDQK	Q9Y266	NUDC	nuclear migration protein nudC
LQILNLGAK	O00203	AP3B1	AP-3 complex subunit beta-1
LQIDEQLR	P51114	FXR1	fragile X mental retardation syndrome-related protein 1
LQIASDENYKDPTNLQGK	Q13813	SPTN1	spectrin alpha chain, non-erythrocytic 1
LQHIQAPLSWELVRPHIYGYAVK	Q9H8H3	TMT1A	methyltransferase-like protein 7A
LQHAAELIK	Q8WUM4	PDC6I	programmed cell death 6-interacting protein
LQGEVVAFDYQSK	Q3MHD2	LSM12	protein LSM12 homolog
LQGEIAHVK	P35908	KRT2	Keratin, type II cytoskeletal 2 epidermal
LQGEFQLR	Q14204	DYHC1	cytoplasmic dynein 1 heavy chain 1
LQFPLPTAQR	P51570	GALK1	galactokinase
LQEVFGHAIK	P54136	SYRC	arginine--tRNA ligase, cytoplasmic
LQETLSAADR	P78527	PRKDC	DNA-dependent protein kinase catalytic subunit
LQELSAEER	Q9NTK5	OLA1	obg-like ATPase 1
LQELEGAVK	P35580	MYH10	myosin-10
LQELALALK	Q9BXJ8	TACAN	transmembrane protein 120A
LQEESDLELAK	O75822	EIF3J	Eukaryotic translation initiation factor 3 subunit J
LQEEMLQR	P08670	VIME	vimentin
LQEALNLFK	P63092	GNAS2	Guanine nucleotide-binding protein G(s) subunit alpha isoforms short
LQDEIQNMK	P08670	VIME	vimentin
LQDAINILK	P42704	LPPRC	leucine-rich PPR motif-containing protein, mitochondrial
LQDAEIAR	P06703	S10A6	protein S100-A6
LQAVEVVITHLAPGTK	Q9Y2V2	CHSP1	calcium-regulated heat stable protein 1
LQAQLNELQAQLSQK	Q14980	NUMA1	nuclear mitotic apparatus protein 1
LQALDTGWNELHK	Q01082	SPTB2	spectrin beta chain, non-erythrocytic 1
LQAGEYVSLGK	O60488	ACSL4	long-chain-fatty-acid--CoA ligase 4
LQAENLQLR	Q9Y2X7	GIT1	ARF GTPase-activating protein GIT1
LQAENDASKEEVK	P33176	KINH	kinesin-1 heavy chain
LQAEAQQLR	Q16543	CDC37	hsp90 co-chaperone Cdc37
LQAEAPHIVVGTPGR	Q14240	IF4A2	eukaryotic initiation factor 4A-II
LQAASPELTQAAIMEK	P20711	DDC	aromatic-L-amino-acid decarboxylase
LPYDVTPEQALAHEEVK	P46940	IQGA1	ras GTPase-activating-like protein IQGAP1
LPTPVLLPYKPQVIR	Q96T76	MMS19	MMS19 nucleotide excision repair protein homolog
LPTGQISGPEIK	Q09666	AHNK	neuroblast differentiation-associated protein AHNAK
LPSGQYLQR	Q15031	SYLM	probable leucine--tRNA ligase, mitochondrial
LPQLPITNFSR	P21333	FLNA	filamin-A
LPLQLDDAVRPEAEGEEEGR	P14868	SYDC	aspartate--tRNA ligase, cytoplasmic
LPLQDVYK	P68104	EEF1A1	Elongation factor 1-alpha 1
LPIGDVATQYFADR	Q99832	TCPH	T-complex protein 1 subunit eta
LPHVLLLQLGTTFFK	O43809	CPSF5	cleavage and polyadenylation specificity factor subunit 5
LPHSVLLEIQK	Q9Y617	PSAT1	Phosphoserine aminotransferase
LPGLQATVR	Q92621	NU205	nuclear pore complex protein Nup205
LPGGVQNFPQFSALR	Q7Z6Z7	HUWE1	E3 ubiquitin-protein ligase HUWE1
LPGELEPVQATQNK	O75821	EIF3G	eukaryotic translation initiation factor 3 subunit G
LPFAAAQIGNSFR	P41250	GARS	glycine--tRNA ligase
LPEVQQATK	Q13428	TCOF	treacle protein
LPESNQTLLR	Q9BTW9	TBCD	tubulin-specific chaperone D
LPEIYIQLQR	Q9H223	EHD4	EH domain-containing protein 4
LPDGTSLTQTFR	Q04323	UBXN1	UBX domain-containing protein 1
LPDDQIPK	Q01813	PFKAP	6-phosphofructokinase type C
LPANQYTWSSR	P29144	TPP2	tripeptidyl-peptidase 2
LPANHPLLTGQR	P38606	VATA	V-type proton ATPase catalytic subunit A
LPAELQELPGLSHQYWSAPSDK	P27695	APEX1	DNA-(apurinic or apyrimidinic site) lyase
LNVTSTWNLASPLLSVSVDGTQR	P05165	PCCA	Propionyl-CoA carboxylase alpha chain, mitochondrial
LNTLLQR	Q00839	HNRPU	heterogeneous nuclear ribonucleoprotein U
LNSVQSSERPLFLVHPIEGSTTVFHSLASR	P49327	FASN	Fatty acid synthase
LNSNTQVVLLSATMPSDVLEVTK	P60842	IF4A1	eukaryotic initiation factor 4A-I
LNQLKPGLQYK	Q12906	ILF3	interleukin enhancer-binding factor 3
LNQDQLDAVSK	Q14444	CAPR1	caprin-1
LNPTWNHPDQDTEAGFK	Q9HB07	MYG1	MYG1 exonuclease
LNMILVQILK	O14980	XPO1	exportin-1
LNLSQVR	Q92499	DDX1	ATP-dependent RNA helicase DDX1
LNITVVQAK	Q9H0E2	TOLIP	toll-interacting protein
LNIQPSEADYAVDIR	Q9NYU2	UGGG1	UDP-glucose:glycoprotein glucosyltransferase 1
LNIPVSQVNPR	P05023	AT1A1	sodium/potassium-transporting ATPase subunit alpha-1
LNIIIVAEGAIDTQNKPITSEK	Q01813	PFKAP	6-phosphofructokinase type C
LNIGDLQVTK	Q9UNM6	PSD13	26S proteasome non-ATPase regulatory subunit 13
LNFIQVSK	Q9NV88	INT9	integrator complex subunit 9
LNESTFDTQITK	P78527	PRKDC	DNA-dependent protein kinase catalytic subunit
LNEILQAR	Q99613	EIF3C	eukaryotic translation initiation factor 3 subunit C
LNEAQPSTIATSMR	P56537	IF6	eukaryotic translation initiation factor 6
LNEAAAGLNQAATELVQASR	Q9Y490	TLN1	talin-1
LNDLIQR	P53621	COPA	coatomer subunit alpha
LNDLEEALQQAK	P35908	KRT2	Keratin, type II cytoskeletal 2 epidermal
LNDLEDALQQAK	P04264	KRT1	Keratin, type II cytoskeletal 1
LNDGNEYLFQAK	Q01082	SPTBN1	Spectrin beta chain, non-erythrocytic 1
LNAIYQNNLTK	P00390	GSHR	glutathione reductase, mitochondrial
LMMDPLSGQNR	O43390	HNRPR	heterogeneous nuclear ribonucleoprotein R
LMAFQPAPK	Q96C36	P5CR2	pyrroline-5-carboxylate reductase 2
LLVSASQDGK	P62873	GBB1	guanine nucleotide-binding protein G(I)/G(S)/G(T) subunit beta-1
LLVPLVPDLQDVAQLR	Q9BSJ8	ESYT1	extended synaptotagmin-1
LLTSGYLQR	Q96FW1	OTUB1	Ubiquitin thioesterase OTUB1
LLTQHENIK	Q01082	SPTBN1	Spectrin beta chain, non-erythrocytic 1
LLSTSPALQGTPASR	Q9UBB6	NCDN	neurochondrin
LLSSAFDEVYPALPSDVQTAIK	O00410	IPO5	importin-5
LLSRPQDALEGVVLSPSLEAR	Q9NVI7	ATD3A	ATPase family AAA domain-containing protein 3A
LLQTSNITK	Q13153	PAK1	Serine/threonine-protein kinase PAK 1
LLQSNPVLEAFGNAK	O00159	MYO1C	unconventional myosin-Ic
LLQSIGQAPESISEK	Q13564	ULA1	NEDD8-activating enzyme E1 regulatory subunit
LLQQVSQIYQSIEFSR	Q14152	EIF3A	eukaryotic translation initiation factor 3 subunit A
LLQQGLAQVEAGR	O15240	VGF	neurosecretory protein VGF
LLQQEEEIK	P54136	SYRC	arginine--tRNA ligase, cytoplasmic
LLQPPAPIMPLDTNWPLLTVSK	P53621	COPA	coatomer subunit alpha
LLQLVEDR	P17844	DDX5	probable ATP-dependent RNA helicase DDX5
LLQLQEQMR	P15924	DESP	desmoplakin
LLQDSVDFSLADAINTEFK	P08670	VIME	vimentin
LLQDHPWLLSQNLVVKPDQLIK	P53396	ACLY	ATP-citrate synthase
LLQDFFNGR	P0DMV8	HS71A	heat shock 70 kDa protein 1A/1B
LLQDFFNGK	P11142	HSPA8	heat shock cognate 71 kDa protein
LLQAQGVEVPSK	O60841	IF2P	eukaryotic translation initiation factor 5B
LLQAPELETR	Q6SZW1	SARM1	sterile alpha and TIR motif-containing protein 1
LLQAGFSELK	Q9ULA0	DNPEP	aspartyl aminopeptidase
LLQAFLER	P55060	XPO2	exportin-2
LLQAETASNSAR	Q14980	NUMA1	nuclear mitotic apparatus protein 1
LLQAAAGASAR	Q96T76	MMS19 MMS19L	MMS19 nucleotide excision repair protein homolog
LLPQVLNSWSIGR	Q8IZL8	PELP1	Proline-, glutamic acid- and leucine-rich protein 1
LLPQLTYLDGYDR	P39687	AN32A	acidic leucine-rich nuclear phosphoprotein 32 family member A
LLNQPNQWPLVK	P14923	PLAK	junction plakoglobin
LLNILMQLR	O60264	SMCA5	SWI/SNF-related matrix-associated actin-dependent regulator of chromatin subfamily A member 5
LLNDEDQVVVNK	P35222	CTNB1	catenin beta-1
LLLQVQHASK	P05141	ADT2	ADP/ATP translocase 2
LLLIQAFRPDR	Q14204	DYHC1	cytoplasmic dynein 1 heavy chain 1
LLLFLSTELQASQILQNK	Q52LJ0	FA98B	protein FAM98B
LLISLSQGNR	P50995	ANX11	annexin A11
LLIQESVWDEAMR	Q8IZ83	A16A1	aldehyde dehydrogenase family 16 member A1
LLIQAAIVR	Q13616	CUL1	cullin-1
LLIIASIGQLK	Q15813	TBCE	tubulin-specific chaperone E
LLIHQSLAGGIIGVK	P61978	HNRPK	heterogeneous nuclear ribonucleoprotein K
LLIEMEQR	P12277	KCRB	creatine kinase B-type
LLHDQVGVIQFGPYK	P53621	COPA	coatomer subunit alpha
LLGWIQNK	O75369	FLNB	filamin-B
LLGSANVVPEALQR	Q8TDZ2	MICA1	protein-methionine sulfoxide oxidase MICAL1
LLGQFTLIGIPPAPR	P38646	GRP75	stress-70 protein, mitochondrial
LLGELLQDNAK	P37837	TALDO	transaldolase
LLEVYDQLFK	O75694	NU155	nuclear pore complex protein Nup155
LLEVQGSRPGK	P62136	PP1A	serine/threonine-protein phosphatase PP1-alpha catalytic subunit
LLETTDRPDGHQNNLR	Q14974	IMB1	importin subunit beta-1
LLETESFQMNR	Q13085	ACACA	acetyl-CoA carboxylase 1
LLEQYKEESK	Q00839	HNRPU	heterogeneous nuclear ribonucleoprotein U
LLEQILVAENR	Q6SZW1	SARM1	sterile alpha and TIR motif-containing protein 1
LLEPAQVQQLADK	Q8NBI6	XXLT1	xyloside xylosyltransferase 1
LLELGPKPEVAQQTR	P53621	COPA	coatomer subunit alpha
LLEGEDAHLSSSQFSSGSQSSR	P02533	KRT14	Keratin, type I cytoskeletal 14
LLEFQLALK	P31948	STIP1	stress-induced-phosphoprotein 1
LLEFNQGK	P41250	GARS	glycine--tRNA ligase
LLEEQLQHEISNK	Q86UP2	KTN1	kinectin
LLEELEEGQK	Q13404	UB2V1	TMEM189-UBE2V2 fusion protein
LLEAQIATGGIIDPK	P15924	DESP	desmoplakin
LLEAHEEQNVDSYTESVK	P54920	NAPA	Alpha-soluble NSF attachment protein
LLDTIGISQPQWR	P27708	PYR1	CAD protein
LLDQIVEK	Q96AE4	FUBP1	far upstream element-binding protein 1
LLDEAIQAVK	Q96QK1	VPS35	Vacuolar protein sorting-associated protein 35
LLAQDQGQGAPLLEPAP	Q15102	PA1B3	platelet-activating factor acetylhydrolase IB subunit gamma
LLANMVYQYK	P28074	PSB5	proteasome subunit beta type-5
LLALLSLGEVGHHIDLSGQLELK	Q86VP6	CAND1	cullin-associated NEDD8-dissociated protein 1
LLADQAEAR	P84098	RL19	60S ribosomal protein L19
LKVPPAINQFTQALDR	P62424	RL7A	60S ribosomal protein L7a
LKPQYLEELPGQLK	P21266	GSTM3	Glutathione S-transferase Mu 3
LKPQLLQGVYAMGFNRPSK	Q9NUU7	DD19A	ATP-dependent RNA helicase DDX19A
LKPDEGGEVPVLNVSYKPQK	P61221	ABCE1	ATP-binding cassette sub-family E member 1
LKETIDNNSVSSPLQSLQQR	P60228	EIF3E	eukaryotic translation initiation factor 3 subunit E
LKETEPVEAYVIQK	P46821	MAP1B	Microtubule-associated protein 1B
LKDSEAELQR	Q16181	SEPTIN7	septin-7
LKDPANFQYPAESVLAYK	P15559	NQO1	NAD(P)H dehydrogenase [quinone] 1
LKDLNSQADSLMTSSAFDTSQVK	Q13813	SPTN1	spectrin alpha chain, non-erythrocytic 1
LKDDEVAQLKK	P07195	LDHB	L-lactate dehydrogenase B chain
LKDDEVAQLK	P07195	LDHB	L-lactate dehydrogenase B chain
LIYFQLHR	Q13263	TIF1B	transcription intermediary factor 1-beta
LIWLYQNLIK	Q15386	UBE3C	ubiquitin-protein ligase E3C
LIVDEAINEDNSVVSLSQPK	P55072	TERA	transitional endoplasmic reticulum ATPase
LITYLDQTTQK	Q13620	CUL4B	cullin-4B
LITTQQWLIK	P00846	ATP6 ATPASE6 MTATP6	ATP synthase subunit a (F-ATPase protein 6)
LITGIIYPQNK	Q9Y6W3	CAN7	calpain-7
LITEDVQGK	P61247	RS3A	40S ribosomal protein S3a
LITDLQDQNQK	P33176	KINH	kinesin-1 heavy chain
LISVDTEHSNIYLQNGPDR	P00450	CP	Ceruloplasmin
LISQIVSSITASLR	P68366	TUBA4A	Tubulin alpha-4A chain
LIQNNHYAMEDVATR	Q13813	SPTN1	spectrin alpha chain, non-erythrocytic 1
LIQELAK	O43681	GET3	ATPase GET3
LINQPLPDLK	P11137	MTAP2	microtubule-associated protein 2
LILYHWTHSFSSQK	Q8TB36	GDAP1	ganglioside-induced differentiation-associated protein 1
LILSETSIFDVLPNFFYHSNQVVR	Q13085	ACACA	acetyl-CoA carboxylase 1
LILPHVDIQLK	P48735	IDHP	isocitrate dehydrogenase [NADP], mitochondrial
LILEQMQK	P31948	STIP1	stress-induced-phosphoprotein 1
LIITQVR	P42704	LPPRC	leucine-rich PPR motif-containing protein, mitochondrial
LIHPVQFVFLR	Q2TAA5	ALG11	GDP-Man:Man(3)GlcNAc(2)-PP-Dol alpha-1,2-mannosyltransferase
LIGQIVSSITASLR	Q71U36	TBA1A	tubulin alpha-1A chain
LIFQMPQNK	P46940	IQGA1	ras GTPase-activating-like protein IQGAP1
LIEYYQQLAQK	Q9UJW0	DCTN4	dynactin subunit 4
LIEQYELR	P40222	TXLNA	Alpha-taxilin
LIDPQTQVTR	Q9UKG1	DP13A	DCC-interacting protein 13-alpha
LIDELENSQK	Q7Z4S6	KI21A	kinesin-like protein KIF21A
LIDDMVAQVLK	P48735	IDHP	isocitrate dehydrogenase [NADP], mitochondrial
LIDDMVAQAMK	O75874	IDHC	isocitrate dehydrogenase [NADP] cytoplasmic
LHSLLGDYYQAIK	Q9Y262	EIF3L	eukaryotic translation initiation factor 3 subunit L
LHIVALIAQK	Q14008	CKAP5	cytoskeleton-associated protein 5
LHISPSNMTNQNTPEYMEK	Q92769	HDAC2	histone deacetylase 2
LHIIEVGTPPTGNQPFPK	Q00610	CLH1	clathrin heavy chain 1
LHGSVGGAQNLSALGALVSLSNAR	Q8IZL8	PELP1	proline-, glutamic acid- and leucine-rich protein 1
LHFLMTGYTPLTTDQSVASVR	P23258	TBG1	tubulin gamma-1 chain
LHDINAQLVEDQGFLDTLK	Q10567	AP1B1	AP-1 complex subunit beta-1
LGYTHLYSSTQVSVRPLQHTQYER	P39656	OST48	dolichyl-diphosphooligosaccharide--protein glycosyltransferase 48 kDa subunit
LGYFSVDPDSHQGK	P47897	SYQ	glutamine--tRNA ligase
LGVQVVITDPEK	P17987	TCPA	T-complex protein 1 subunit alpha
LGVQTVAVYSEADR	Q96RQ3	MCCA	methylcrotonoyl-CoA carboxylase subunit alpha, mitochondrial
LGVLHVGQK	Q9NTJ5	SAC1	phosphatidylinositide phosphatase SAC1
LGVDLDAQTWR	P22102	PUR2	trifunctional purine biosynthetic protein adenosine-3
LGVAGQWR	P09936	UCHL1	ubiquitin carboxyl-terminal hydrolase isozyme L1
LGTPVLQALGDGDFVK	Q16822	PCK2	Phosphoenolpyruvate carboxykinase [GTP], mitochondrial
LGTPQQIAIAR	Q7L576	CYFP1	cytoplasmic FMR1-interacting protein 1
LGSSGLGSASSIQAAVR	Q7Z6Z7	HUWE1	E3 ubiquitin-protein ligase HUWE1
LGSIAIQGAIEK	P24752	THIL	acetyl-CoA acetyltransferase, mitochondrial
LGQSESQGPPR	O00233	PSMD9	26S proteasome non-ATPase regulatory subunit 9
LGQSDPAPLQHQMDIYQK	P29401	TKT	transketolase
LGQGVLVQVSPSLVK	Q13868	EXOS2	exosome complex component RRP4
LGQALTEVYAK	Q00341	VIGLN	vigilin
LGLQSLR	P18085	ARF4	ADP-ribosylation factor 4
LGLQNDLFSLAR	P55786	PSA	puromycin-sensitive aminopeptidase
LGLPPLTPEQQEALQK	Q9UHX1	PUF60	poly(U)-binding-splicing factor PUF60
LGLFYQLLHK	A1L0T0	HACL2	acetolactate synthase-like protein
LGLAPQIQDLYGK	P46940	IQGA1	ras GTPase-activating-like protein IQGAP1
LGIQLDFEK	Q14683	SMC1A	structural maintenance of chromosomes protein 1A
LGIHEDSQNR	P07900	HS90A	heat shock protein HSP 90-alpha
LGHPEALSAGTGSPQPPSFTYAQQR	Q15942	ZYX	zyxin
LGHELQQAGLK	Q14980	NUMA1	nuclear mitotic apparatus protein 1
LGGLTQAPGNPVLAVQINQDK	P26368	U2AF2	splicing factor U2AF 65 kDa subunit
LGGIGQFLAK	Q08211	DHX9	ATP-dependent RNA helicase A
LGGAVLSFSEATSSVQK	P27708	PYR1	CAD protein
LGFSEVELVQMVVDGVK	P12277	KCRB	creatine kinase B-type
LGFQVWLK	Q01995	TAGL	transgelin
LGFHLPLEVAYQR	Q15149	PLEC	plectin
LGFAGLVQEISFGTTK	P48643	TCPE	T-complex protein 1 subunit epsilon
LGEMWSEQSAK	P26583	HMGB2	high mobility group protein B2
LGEMWNNTAADDKQPYEK	P09429	HMGB1	high mobility group protein B1
LGEHNIEVLEGNEQFINAAK	P07477	PRSS1	Serine protease 1
LGAVFNQVAFPLQYTPR	Q15393	SF3B3	splicing factor 3B subunit 3
LGAQALLGAAK	P32322	P5CR1	pyrroline-5-carboxylate reductase 1, mitochondrial
LGALSGAAALGFASYGAHGAQFPDAYGK	Q8N2U0	TM256	transmembrane protein 256
LFVVPADEAQAR	Q8IV08	PLD3	phospholipase D3
LFVTGLFSLNQDIPAFK	O14980	MGST3	Glutathione S-transferase 3, mitochondrial
LFVQDLATR	P33176	KINH	kinesin-1 heavy chain
LFVPNTQSGQR	Q01968	OCRL	inositol polyphosphate 5-phosphatase OCRL-1
LFVEALGQIGPAPPLK	P27708	PYR1	CAD protein
LFQVEYAIEAIK	P28066	PSA5	proteasome subunit alpha type-5
LFQSNDQTLR	Q9UBF2	COPG2	coatomer subunit gamma-2
LFQSNDPTLR	Q9Y678	COPG1	coatomer subunit gamma-1
LFQLPTPPLSR	Q9Y6K0	CEPT1	choline/ethanolaminephosphotransferase 1
LFQLNR	Q12996	CSTF3	cleavage stimulation factor subunit 3
LFPLIQAMHPTLAGK	P11940	PABPC1	Polyadenylate-binding protein 1
LFLVQLQEK	O43809	CPSF5	cleavage and polyadenylation specificity factor subunit 5
LFLQGPK	P11498	PC	Pyruvate carboxylase, mitochondrial
LFLQFVTGSPR	Q14669	TRIPC	E3 ubiquitin-protein ligase TRIP12
LFKPPQPPAR	O15372	EIF3H	eukaryotic translation initiation factor 3 subunit H
LFKPGQEAVK	Q8NBS9	TXND5	thioredoxin domain-containing protein 5
LFIGGLPNYLNDDQVK	P26368	U2AF2	Splicing factor U2AF 65 kDa subunit
LFIGGLNVQTSESGLR	Q13151	ROA0	heterogeneous nuclear ribonucleoprotein A0
LFGGFNSSDTVTSPQR	P12931	SRC	proto-oncogene tyrosine-protein kinase Src
LFGAVEHLQLANSYGLFR	Q9BU23	LMF2	lipase maturation factor 2
LFGAAEVQR	Q13813	SPTN1	spectrin alpha chain, non-erythrocytic 1
LFEAPNFFQK	P51003	PAPOA	poly(A) polymerase alpha
LFDSTTLEHQK	Q13347	EIF3I	eukaryotic translation initiation factor 3 subunit I
LFDQAFGLPR	P04792	HSPB1	heat shock protein beta-1
LFDHPESPTPNPTEPLFLAQAEVYK	P49327	FAS	fatty acid synthase
LEWVQDNIR	O94906	PRP6	pre-mRNA-processing factor 6
LEVNLQAMK	P35579	MYH9	Myosin-9
LETGQFLTFR	A0AVT1	UBA6	ubiquitin-like modifier-activating enzyme 6
LESLNIQR	Q14152	EIF3A	eukaryotic translation initiation factor 3 subunit A
LESALTELEQLR	P12270	TPR	Nucleoprotein TPR (Megator)
LEQSEAQLGR	Q92905	CSN5	COP9 signalosome complex subunit 5
LEQLGIPR	Q07960	ARHGAP1 CDC42GAP RHOGAP1	Rho GTPase-activating protein 1
LEQGQAIDDLMPAQK	P12277	KCRB	creatine kinase B-type
LEQELFSGGNTGINFEK	O00571	DDX3X	ATP-dependent RNA helicase DDX3X
LEQEIATYR	P02533	KRT14	Keratin, type I cytoskeletal 14
LEQDEYALR	P55084	ECHB	trifunctional enzyme subunit beta, mitochondrial
LEPKPQPPVAEATPR	Q9UHD8	SEPTIN9	septin-9
LENEIQTYR	P13645	KRT10	Keratin, type I cytoskeletal 10
LENDQIESLR	P56192	SYMC	methionine--tRNA ligase, cytoplasmic
LEMNLGLQK	Q01082	SPTB2	spectrin beta chain, non-erythrocytic 1
LELSVHLQPITR	O75643	SNRNP200	U5 small nuclear ribonucleoprotein 200 kDa helicase
LELQGPR	P19338	NCL	Nucleolin
LEILQQQLQVANEAR	Q14980	NUMA1	nuclear mitotic apparatus protein 1
LEILQIHTK	P55072	TERA	transitional endoplasmic reticulum ATPase
LEIAPQIYGLR	Q92609	TBCD5	TBC1 domain family member 5
LEHEYIQNFK	Q15691	MARE1	microtubule-associated protein RP/EB family member 1
LEGGSGGDSEVQR	P62195	PRS8	26S protease regulatory subunit 8
LEDLEVIQHR	Q01082	SPTB2	spectrin beta chain, non-erythrocytic 1
LEDLATLIQK	O43795	MYO1B	Unconventional myosin-Ib
LEALITQTR	Q9UHB9	SRP68	signal recognition particle subunit SRP68
LDYGQHVVAGTPGR	P38919	IF4A3	eukaryotic initiation factor 4A-III
LDVQFSGLTK	P21333	FLNA	filamin-A
LDVQFAGTAK	Q14315	FLNC	filamin-C
LDSSAQFGYYFR	P43246	MSH2	DNA mismatch repair protein Msh2
LDSIVIQQGR	O60264	SMCA5	SWI/SNF-related matrix-associated actin-dependent regulator of chromatin subfamily A member 5
LDQWLTTMLLR	P54920	SNAA	alpha-soluble NSF attachment protein
LDQPMTEIVSR	P22314	UBA1	ubiquitin-like modifier-activating enzyme 1
LDQLIYIPLPDEK	P55072	TERA	transitional endoplasmic reticulum ATPase
LDQETAQWLR	Q96G03	PGM2	Phosphopentomutase
LDQAVLDLQR	Q9H3U1	UN45A	protein unc-45 homolog A
LDPYVQR	Q14204	DYHC1	cytoplasmic dynein 1 heavy chain 1
LDPSIFESLQK	Q9Y265	RUVB1	ruvB-like 1
LDPHLVLDQLR	P35579	MYH9	myosin-9
LDPGSEETQTLVR	P26641	EF1G	elongation factor 1-gamma
LDNASAFQGAVISPHYDSLLVK	P11498	PC	Pyruvate carboxylase, mitochondrial
LDLDLTADSQPPVFK	Q13263	TIF1B	transcription intermediary factor 1-beta
LDILDQER	Q13813	SPTN1	spectrin alpha chain, non-erythrocytic 1
LDIDPETITWQR	P11586	MTHFD1	C-1-tetrahydrofolate synthase, cytoplasmic
LDGNQDLIR	P48735	IDHP	isocitrate dehydrogenase [NADP], mitochondrial
LDGNLLTQPGQAR	Q9BTW9	TBCD	tubulin-specific chaperone D
LDGEIIPHIPANQEVLNK	P30520	PURA2	adenylosuccinate synthetase isozyme 2
LDFYQHSWLPAR	Q9HB07	MYG1	MYG1 exonuclease
LDEFGEQLSK	O14983	ATP2A1	Sarcoplasmic/endoplasmic reticulum calcium ATPase 1
LDASTSHQNLR	Q9BTV5	FSD1	fibronectin type III and SPRY domain-containing protein 1
LDAEPRPPPTQEAA	Q9Y285	SYFA	phenylalanine--tRNA ligase alpha subunit
LAYYYQR	P61011	SRP54	Signal recognition particle subunit SRP54
LAWGQPVGLR	P47897	SYQ	glutamine--tRNA ligase
LAVQFTNR	Q7L8L6	FAKD5	FAST kinase domain-containing protein 5
LATTILQHWK	P78527	PRKDC	DNA-dependent protein kinase catalytic subunit
LATQSNEITIPVTFESR	P04792	HSPB1	heat shock protein beta-1
LATQLTGPVMPVR	P26373	RL13	60S ribosomal protein L13
LATLLGLQAPPTR	Q14152	EIF3A	eukaryotic translation initiation factor 3 subunit A
LATFVTQALIQLYAR	Q9UIA9	XPO7	exportin-7
LASTLVHLGEYQAAVDGAR	Q00610	CLH1	clathrin heavy chain 1
LASQGDSISSQLGPIHPPPR	Q92945	FUBP2	far upstream element-binding protein 2
LASQANIAQVLAELK	P63010	AP2B1	AP-2 complex subunit beta
LASIVEQVSVLQNQGR	P54886	P5CS	delta-1-pyrroline-5-carboxylate synthase
LASAFTEEQAVLYNQR	Q9UHB9	SRP68	signal recognition particle subunit SRP68
LAQVSPELLLASVR	O43592	XPOT	exportin-T
LAQSNGWGVMVSHR	P13929	ENOB	beta-enolase
LAQPYVGVFLK	P36776	LONM	lon protease homolog, mitochondrial
LAQGLTHLGK	Q13200	PSMD2	26S proteasome non-ATPase regulatory subunit 2
LAQFVEHWK	Q13813	SPTN1	spectrin alpha chain, non-erythrocytic 1
LAQFEPSQR	Q08211	DHX9	ATP-dependent RNA helicase A
LAQFDYGR	Q5T9A4	ATAD3B	ATPase family AAA domain-containing protein 3B
LAQEQGGGDNSLLVR	Q9UID3	VPS51	vacuolar protein sorting-associated protein 51 homolog
LAQAWFNTHR	Q96A33	CCD47	coiled-coil domain-containing protein 47
LAQANGWGVMVSHR	P06733	ENOA	alpha-enolase
LAQAHPAGPPTLDPVNDLQLK	Q15477	SKI2	helicase SKI2W
LAQAAQSSVATITR	Q9Y490	TLN1	talin-1
LAPPLVTLLSGEPEVQYVALR	P63010	AP2B1	AP-2 complex subunit beta
LAPPLVTLLSAEPELQYVALR	Q10567	AP1B1	AP-1 complex subunit beta-1
LANQFAIYKPVTDFFLQLVDAGK	P42704	LPPRC	leucine-rich PPR motif-containing protein, mitochondrial
LANQAADYFGDAFK	Q8WUM4	PDC6I	programmed cell death 6-interacting protein
LANLPEEVIQK	P52701	MSH6	DNA mismatch repair protein Msh6
LANIDEEMLQK	P54136	SYRC	arginine--tRNA ligase, cytoplasmic
LANFIPWGPASIQVALSR	P23258	TUBG1	Tubulin gamma-1 chain
LAMQEFMILPVGAANFR	P06733	ENOA	alpha-enolase
LALVNNTQPK	Q6PGP7	SKI3	tetratricopeptide repeat protein 37
LALSPNAQVLALASGSSIHLYNTR	Q9Y4P3	TBL2	transducin beta-like protein 2
LALQALTEK	Q07065	CKAP4	cytoskeleton-associated protein 4
LALLQVR	P19367	HXK1	hexokinase-1
LALIQPSR	P78330	SERB	phosphoserine phosphatase
LALIQLQISSIK	Q9NQR4	NIT2	omega-amidase NIT2
LAIQLGAQALLGAAK	Q96C36	P5CR2	pyrroline-5-carboxylate reductase 2
LAILQVGNR	P11586	C1TC	C-1-tetrahydrofolate synthase, cytoplasmic
LAILDQELEHK	Q12888	TP53B	tumor suppressor p53-binding protein 1
LAHLGVQVK	P04843	RPN1	dolichyl-diphosphooligosaccharide--protein glycosyltransferase subunit 1
LAGVTLGQR	P26358	DNMT1	DNA (cytosine-5)-methyltransferase 1
LAGTQPLEVLEAVQR	P22314	UBA1	ubiquitin-like modifier-activating enzyme 1
LAGFLDLTEQEFR	Q9Y262	EIF3L	eukaryotic translation initiation factor 3 subunit L
LAETVFNFQEK	Q14204	DYHC1	cytoplasmic dynein 1 heavy chain 1
LAETQEEISAEVAAK	Q96HJ9	FMC1	Protein FMC1 homolog
LAEQAER	P61981	1433G	14-3-3 protein gamma
LAENIDAQLK	P37198	NUP62	nuclear pore glycoprotein p62
LAELEEFINGPNNAHIQQVGDR	Q00610	CLH1	clathrin heavy chain 1
LAELEEALQK	P13647	KRT5	Keratin, type II cytoskeletal 5
LAEIGAPIQGNR	Q13435	SF3B2	splicing factor 3B subunit 2
LADLFGWSQLIYNHITTR	P35611	ADDA	alpha-adducin
LADIEQSTGIR	Q99707	METH	methionine synthase
LADDLSTLQEK	Q14980	NUMA1	nuclear mitotic apparatus protein 1
LADALQELR	P02545	LMNA	lamin
LAAVDATVNQVLASR	Q15084	PDIA6	protein disulfide-isomerase A6
LAAVALINAAIQK	P46940	IQGA1	ras GTPase-activating-like protein IQGAP1
LAASGEGGLQELSGHFENQK	Q16643	DREB	drebrin
LAAQFIPK	Q9BZZ5	API5	apoptosis inhibitor 5
LAAQENRPVTDHLDEQAVQGLK	Q9BTW9	TBCD	tubulin-specific chaperone D
LAALADQWQFLVQK	Q13813	SPTN1	spectrin alpha chain, non-erythrocytic 1
LAAGHLVQLPAGVK	Q16850	CP51A	lanosterol 14-alpha demethylase
LAAFGQLHK	Q12906	ILF3	interleukin enhancer-binding factor 3
LAAEQELIR	Q15149	PLEC	plectin
KYSQFINFPIYVWSSK	P14625	ENPL	endoplasmin
KYGGPPPDSVYSGVQPGIGTEVFVGK	O43390	HNRPR	heterogeneous nuclear ribonucleoprotein R
KYEQGFITDPVVLSPK	P12268	IMDH2	inosine-5'-monophosphate dehydrogenase 2
KYEMFAQTLQQSR	P55072	TERA	transitional endoplasmic reticulum ATPase
KVTSVVFHPSQDLVFSASPDATIR	Q9UMS4	PRP19	pre-mRNA-processing factor 19
KVQGGALEDSQLVAGVAFK	Q99832	TCPH	T-complex protein 1 subunit eta
KVPQVSTPTLVEVSR	P02768	ALB	Albumin
KVIEEQLEPAVEK	P42704	LPPRC	leucine-rich PPR motif-containing protein, mitochondrial
KVESLQEEIAFLK	P08670	VIME	vimentin
KVEAQLQELQVK	P35579	MYH9	myosin-9
KVDEAIALFQK	Q14145	KEAP1	kelch-like ECH-associated protein 1
KTHIQDNHDGTYTVAYVPDVTGR	P21333	FLNA	filamin-A
KTDDVEAMSSQPALALDER	P46821	MAP1B	microtubule-associated protein 1B
KTAAELLQSQGSQAGGSQTLK	Q14141	SEPTIN6	septin-6
KSADTLWGIQK	P00338	LDHA	L-lactate dehydrogenase A chain
KQVVNIPSFIVR	P46781	RS9	40S ribosomal protein S9
KQTIDNSQGAYQEAFDISK	P27348	1433T	14-3-3 protein theta
KQTALVELVK	P02768	ALB	Albumin
KQSLGELIGTLNAAK	P60174	TPIS	triosephosphate isomerase
KQQISLATQMVR	P48643	CCT5	T-complex protein 1 subunit epsilon
KQNNFSLAMK	P78527	PRKDC	DNA-dependent protein kinase catalytic subunit
KQNDVFGEAEQ	P31150	GDIA	rab GDP dissociation inhibitor alpha
KQISNLQQSISDAEQR	P04264	KRT1	Keratin, type II cytoskeletal 1
KQGGLGPMNIPLVSDPK	Q06830	PRDX1	peroxiredoxin-1
KQEVQAWDGEVR	P45974	UBP5	ubiquitin carboxyl-terminal hydrolase 5
KQELLEALTK	P12956	XRCC6	X-ray repair cross-complementing protein 6
KPLTSSSAAPQRPISTQR	Q15691	MARE1	microtubule-associated protein RP/EB family member 1
KLPIQEFHLSR	P39748	FEN1	flap endonuclease 1
KLNVTEQEK	P06733	ENOA	alpha-enolase
KLNEILQAR	Q99613	EIF3C	Eukaryotic translation initiation factor 3 subunit C
KLIYFQLHR	Q13263	TIF1B	transcription intermediary factor 1-beta
KLISVDTEHSNIYLQNGPDR	P00450	CP	Ceruloplasmin
KLEHLITELVHQR	Q14204	DYHC1	cytoplasmic dynein 1 heavy chain 1
KITIGQAPTEK	P11586	C1TC	C-1-tetrahydrofolate synthase, cytoplasmic
KIHPQTIIAGWR	P78371	CCT2	T-complex protein 1 subunit beta
KIHIDLPNEQAR	P62333	PSMC6	26S proteasome regulatory subunit 10B
KIEPELDGSAQVTSHDASTNGLINFIK	P06744	GPI	Glucose-6-phosphate isomerase
KIDASQTEFEK	O94979	SEC31A	Protein transport protein Sec31A
KIDAAQNWLADPNGGPEGEEQIR	P18206	VCL	Vinculin (Metavinculin) (MV)
KHVQLSHEFESLVR	P20711	DDC	aromatic-L-amino-acid decarboxylase
KHSQFIGYPITLYLEK	P08238	HS90B	heat shock protein HSP 90-beta
KHSQFIGYPITLFVEK	P07900	HSP90AA1	Heat shock protein HSP 90-alpha
KHEALMSDLSAYGSSIQALR	Q13813	SPTN1	spectrin alpha chain, non-erythrocytic 1
KHEAFESDLAAHQDR	O43707	ACTN4	alpha-actinin-4
KGQTHTLEDFQR	Q99714	HCD2	3-hydroxyacyl-CoA dehydrogenase type-2
KGPAAIQK	P35527	K1C9	keratin, type I cytoskeletal 9
KGESQTDIEITR	P49368	TCPG	T-complex protein 1 subunit gamma
KGDIIQLQR	P07814	SYEP	bifunctional glutamate/proline--tRNA ligase
KFNALFAQGNYSEAAK	Q00610	CLH1	clathrin heavy chain 1
KFLETVELQISLK	P62906	RL10A	60S ribosomal protein L10a
KFDQLLAEEK	P35579	MYH9	Myosin-9
KEEELQGALAR	P35580	MYH10	myosin-10
KEEELQAALAR	P35579	MYH9	myosin-9
KEDLYLKPIQR	P13639	EF2	elongation factor 2
KDIENQYETQITQIEHEVSSSGQEVQSSAK	P35527	K1C9	keratin, type I cytoskeletal 9
KANLQIDQINTDLNLER	P35579	MYH9	myosin-9
IYVDDGLISLQVK	P14618	KPYM	pyruvate kinase isozymes M1/M2
IYTFNQSR	Q16851	UGPA	UTP--glucose-1-phosphate uridylyltransferase
IYIGDQVQK	Q9UIA9	XPO7	exportin-7
IWQYVYSK	P42025	ACTY	beta-centractin
IWNALVTALQK	Q6AI08	HEAT6	HEAT repeat-containing protein 6
IWDIGGQPR	Q9NVJ2	ARL8B	ADP-ribosylation factor-like protein 8B
IVVFQYSDGK	Q16531	DDB1	DNA damage-binding protein 1
IVTVVPQDTK	O95163	ELP1	elongator complex protein 1
IVTTPQTVLR	Q7Z2W9	MRPL21	Large ribosomal subunit protein bL21m
IVSWSQVGVEPSIMGIGPIPAIK	Q9BWD1	THIC	acetyl-CoA acetyltransferase, cytosolic
IVSWLEYESSFSNEEAQK	Q02790	FKBP4	peptidyl-prolyl cis-trans isomerase FKBP4
IVSQLLTLMDGLK	P55072	TERA	transitional endoplasmic reticulum ATPase
IVSLFAEHNDLQYAAPGGLIGVGTK	P41091	IF2G	eukaryotic translation initiation factor 2 subunit 3
IVQMTEAEVR	P62140	PP1B	serine/threonine-protein phosphatase PP1-beta catalytic subunit
IVPNVLLEQGK	O75390	CISY	citrate synthase, mitochondrial
IVPGQFLAVDPK	Q15393	SF3B3	splicing factor 3B subunit 3
IVNQPSSLFGSK	Q7Z6Z7	HUWE1	E3 ubiquitin-protein ligase HUWE1
IVNDDQSFYADVHVEDGLIK	O14531	DPYL4	dihydropyrimidinase-related protein 4
IVNDDQSFYADIYMEDGLIK	Q14195	DPYSL3	Dihydropyrimidinase-related protein 3
IVLAAQAISR	Q9UI10	EI2BD	translation initiation factor eIF-2B subunit delta
IVILEYQPSK	Q15393	SF3B3	splicing factor 3B subunit 3
IVIGYQSHADTATK	P06730	IF4E	eukaryotic translation initiation factor 4E
IVGDLAQFMVQNGLSR	P11498	PC	Pyruvate carboxylase, mitochondrial
IVFQEFR	P35580	MYH10	Myosin-10
IVEGISQPIWLVSDTR	Q15126	PMVK	phosphomevalonate kinase
IVAVTGAEAQK	P49588	SYAC	alanine--tRNA ligase, cytoplasmic
IVATKPLYVALAQR	P11940	PABPC1	Polyadenylate-binding protein 1
IVAPISDSPKPPPQR	O95336	6PGL	6-phosphogluconolactonase
ITSQIFIGPTYYQR	P30876	RPB2	DNA-directed RNA polymerase II subunit RPB2
ITSENPDEGFKPSSGTVQELNFR	Q13085	ACACA	acetyl-CoA carboxylase 1
ITSEALLVTQQLVK	Q86VP6	CAND1	Cullin-associated NEDD8-dissociated protein 1
ITQSNAILR	P21266	GSTM3	glutathione S-transferase Mu 3
ITQLVSDQANHVLAR	Q7Z4S6	KI21A	kinesin-like protein KIF21A
ITQLLGLPTYR	Q9BTW9	TBCD	tubulin-specific chaperone D
ITQDIFQQLLK	P56192	SYMC	methionine--tRNA ligase, cytoplasmic
ITPIQKPR	P51532	SMARCA4	Transcription activator BRG1
ITPENLPQILLQLK	P43243	MATR3	matrin-3
ITPAHDQNDYEVGQR	P26640	VARS1	Valine--tRNA ligase
ITLQDVVSHSK	P46940	IQGA1	ras GTPase-activating-like protein IQGAP1
ITKPGSIDSNNQLFAPGGR	Q04637	EIF4G1	Eukaryotic translation initiation factor 4 gamma 1
ITIGQAPTEK	P11586	C1TC	C-1-tetrahydrofolate synthase, cytoplasmic
ITFLLQAIR	O00410	IPO5	importin-5
ITDVLDQK	Q96T51	RUFY1	RUN and FYVE domain-containing protein 1
ITADLLSNGIDVYPQK	Q9UHD8	SEPTIN9	septin-9
ISVIVETVYTHVLHPYPTQITQSEK	P04843	RPN1	dolichyl-diphosphooligosaccharide--protein glycosyltransferase subunit 1
ISTQLDFASK	P12270	TPR	nucleoprotein TPR
ISSLLEEQFQQGK	P62241	RS8	40S ribosomal protein S8
ISSIQSIVPALEIANAHR	P10809	CH60	60 kDa heat shock protein, mitochondrial
ISQSNYIPTQQDVLR	P08754	GNAI3	guanine nucleotide-binding protein G(k) subunit alpha
ISNQFDWALMR	P42704	LPPRC	leucine-rich PPR motif-containing protein, mitochondrial
ISLQWLR	P27487	DPP4	Dipeptidyl peptidase 4
ISLQAIQQLVR	O75694	NU155	nuclear pore complex protein Nup155
ISLIQIFR	Q6P2Q9	PRPF8	Pre-mRNA-processing-splicing factor 8
ISIEMHGTLEDQLSHLR	P12814	ACTN1	alpha-actinin-1
ISGVGIDQPPYGIFVINQK	Q02413	DSG1	desmoglein-1 preproprotein
ISFPAIQAAPSFSNSFPQIFR	P23381	SYWC	tryptophan--tRNA ligase, cytoplasmic
ISFLENNLEQLTK	O60282	KIF5C	kinesin heavy chainC
ISEQSDAK	P25705	ATPA	ATP synthase subunit alpha, mitochondrial
ISEQFTAMFR	P68371	TBB4B	tubulin beta-4B chain
ISDSVLVDIKDTEPLIQTAK	P48643	TCPE	T-complex protein 1 subunit epsilon
ISDIQSQLEK	Q9NVP1	DDX18	ATP-dependent RNA helicase DDX18
ISAQVVDYYK	Q9H3S7	PTPN23	Tyrosine-protein phosphatase non-receptor type 23
IRLENEIQTYR	P13645	KRT10	Keratin, type I cytoskeletal 10
IREDLPNLESSEETEQINK	Q96QK1	VPS35	Vacuolar protein sorting-associated protein 35
IQYQLVDISQDNALR	Q9H299	SH3L3	SH3 domain-binding glutamic acid-rich-like protein 3
IQVLVEPDHFK	P17931	LEG3	galectin-3
IQVHYYEDGNVQLVSHK	P47755	CAZA2	F-actin-capping protein subunit alpha-2
IQTQPGYANTLR	Q00325	S25A3	phosphate carrier protein, mitochondrial
IQTQLNLIHPDIFPLLTSFR	Q9BQ52	ELAC2	Zinc phosphodiesterase ELAC protein 2
IQTLTSSVR	P16435	NCPR	NADPH--cytochrome P450 reductase
IQTDSVVATLK	P08397	HEM3	porphobilinogen deaminase
IQSTVTQPGGK	Q15155	NOMO1	nodal modulator 1
IQSLLDIQEK	Q93009	UBP7	ubiquitin carboxyl-terminal hydrolase 7
IQQNTFTR	O75369	FLNB	filamin-B
IQQLAISGLK	Q9Y2T2	AP3M1	AP-3 complex subunit mu-1
IQLVAVNYIPEVR	Q9UJW0	DCTN4	Dynactin subunit 4
IQLINNMLDK	P00558	PGK1	Phosphoglycerate kinase 1
IQLIFER	Q15020	SART3	squamous cell carcinoma antigen recognized by T-cells 3
IQLEQVQEWK	Q14203	DCTN1	Dynactin subunit 1
[truncated: 1,289 more rows]
