# Supplementary material for: Chemoproteomic profiling by a bioorthogonal probe reveals cell growth inhibition by histone H4 dopaminylation
Source: Research Square preprint supplement (doi:10.21203/rs.3.rs-4710338/v1), 2024-07-16
Supplement: Supplementary file 2 [file d8b25340541ca3fce9d940c6.xlsx]

## Sheet: dopmaine-modified proteins
Accession	Entry	Entry Name	Description	Rep1	Rep2	Rep3
4505763	P00558	PGK1	phosphoglycerate kinase 1	0.361393	3.32633	2.53643
4557701	Q04695	K1C17	keratin, type I cytoskeletal 17	0.403681	1.78362	1.63349
4757774	P36405	ARL3	ADP-ribosylation factor-like protein 3	0.462398	2.14355	2.4327
4557581	Q01469	FABP5	fatty acid-binding protein, epidermal	0.629631	5.99963	4.1838
17998551	Q96P63	SPB12	serpin B12	0.691629	3.35806	2.22811
16751921	P81605	DCD	dermcidin preproprotein	0.743734	2.59341	1.91795
46249395	Q5VZM2	RRAGB	ras-related GTP-binding protein B	0.744344	∞	2140.6
41393547	A2RRP1	NBAS	neuroblastoma-amplified sequence	0.747666	22.8016	2.20336
19923181	P50479	PDLI4	PDZ and LIM domain protein 4	0.759669	3.62871	2.07015
11875211	Q9UBP0	SPAST	spastin	0.767615	2.21848	1.55545
30410796	P61289	PSME3	proteasome activator complex subunit 3	0.768616	1.74349	1.94967
32307132	Q9Y697	NFS1	cysteine desulfurase, mitochondrial	0.857482	2.10844	1.85163
4759302	O95292	VAPB	vesicle-associated membrane protein-associated protein B/C	0.859398	5.37034	2.1308
70610136	Q86W56	PARG	poly(ADP-ribose) glycohydrolase	0.902884	1.71952	1.80209
55956899	P35527	K1C9	keratin, type I cytoskeletal 9	0.932462	3.3752	1.79147
40068481	Q86TU7	SETD3	histone-lysine N-methyltransferase setd3	0.932571	1.81316	2.45691
150010552	Q5T1M5	FKB15	FK506-binding protein 15	1.14471	2.10469	1278.79
295148109	Q9BW83	IFT27	intraflagellar transport protein 27 homolog	1.17283	2.16188	2.47185
153266822	P47895	AL1A3	aldehyde dehydrogenase family 1 member A3	1.21893	2.39567	1460.43
331284125	Q96L91	EP400	E1A-binding protein p400	1.23482	2.91527	4.57782
55743130	P62910	RL32	60S ribosomal protein L32	1.321	1.60695	1.87852
82799486	Q07343	PDE4B	cAMP-specific 3',5'-cyclic phosphodiesterase 4B	1.33766	3.82882	1.62104
116235456	Q8ND24	RN214	RING finger protein 214	1.3969	3.48349	1407.79
6005860	P42766	RL35	60S ribosomal protein L35	1.42405	2.23155	2.23692
118600975	O00186	STXB3	syntaxin-binding protein 3	1.46438	1.50715	2.45433
28373194	Q16186	ADRM1	proteasomal ubiquitin receptor ADRM1	1.52974	3.05231	2.63378
194018511	Q7Z794	K2C1B	keratin, type II cytoskeletal 1b	1.55605	4.42419	1.86753
178056552	Q15021	CND1	condensin complex subunit 1	1.55946	5.30454	1.63218
38679960	Q13085	ACACA	acetyl-CoA carboxylase 1	1.56076	1.53059	1.75982
116805327	Q96RQ3	MCCA	methylcrotonoyl-CoA carboxylase subunit alpha, mitochondrial	1.604	0.812499	2.03185
12056468	P14923	PLAK	junction plakoglobin	1.6282	3.85917	1.06466
190194355	Q8TCG1	CIP2A	protein CIP2A	1.64054	0.256391	2.01311
119703753	P04259	K2C6B	keratin, type II cytoskeletal 6B	1.64503	3.98333	0.00015086
227498137	Q9NUQ7	UFSP2	ufm1-specific protease 2	1.6745	12.935	1.8503
4501853	P09110	THIK	3-ketoacyl-CoA thiolase, peroxisomal	1.68048	6.96684	1
4885379	P10412	H14	histone H1.4	1.72014	2.67392	1
301129170	Q9BTC0	DIDO1	death-inducer obliterator 1	1.73262	7.20625	10.0041
58530840	P15924	DESP	desmoplakin	1.73294	5.22011	3.13752
54607047	P04062	GBA1	glucosylceramidase	1.73436	2.04725	1038.85
46249373	P78395	PRAME	melanoma antigen preferentially expressed in tumors	1.7346	∞	1.12519
109948283	Q15397	PUM3	pumilio domain-containing protein KIAA0020	1.73804	2.17116	1.71527
45597175	Q66K14	TBC9B	TBC1 domain family member 9B	1.74333	8.82789	2281.61
38569421	P53396	ACLY	ATP-citrate synthase	1.77962	3.00466	2.807
24308073	Q9H3S7	PTN23	tyrosine-protein phosphatase non-receptor type 23	1.77974	4.67772	2.49826
207113160	Q13428	TCOF	treacle protein	1.80124	4.41035	2.47617
4507467	Q15582	BGH3	transforming growth factor-beta-induced protein ig-h3	1.81798	8.90155	1
7657198	Q9UNQ2	DIM1	probable dimethyladenosine transferase	1.81995	1.99748	1.89692
189458821	Q08188	TGM3	protein-glutamine gamma-glutamyltransferase E	1.8299	∞	0.00207064
157384982	Q04726	TLE3	transducin-like enhancer protein 3	1.84272	2.02132
4758996	Q14088	RB33A	ras-related protein Rab-33A	1.9072	3.28147	1
154426322	Q8N806	UBR7	putative E3 ubiquitin-protein ligase UBR7	1.90799	2.22619	1903.99
66363697	O00625	PIR	pirin	1.94966	9.21233	1.94372
17999539	Q92620	PRP16	pre-mRNA-splicing factor ATP-dependent RNA helicase PRP16	1.9708	1.54981	1.53044
209862789	Q7RTP6	MICA3	protein-methionine sulfoxide oxidase MICAL3	2.01674	2.98891	2.16832
42560227	Q06330	SUH	recombining binding protein suppressor of hairless	2.01963	3.08591
73765544	P60484	PTEN	phosphatidylinositol 3,4,5-trisphosphate 3-phosphatase and dual-specificity protein phosphatase PTEN	2.02312	6.55262	2.36117
119703744	Q02413	DSG1	desmoglein-1 preproprotein	2.03499	7.68565	2.72395
264681524	Q93052	LPP	lipoma-preferred partner	2.06876	∞
27597090	Q7KZ85	SPT6H	transcription elongation factor SPT6	2.08573	2.53053	3.23112
21218438	Q8WXI9	P66B	transcriptional repressor p66-beta	2.0898	2.75802	2.60867
194097323	P30084	ECHM	enoyl-CoA hydratase, mitochondrial	2.09006	1.61963	12.3393
239047414	Q8WYL5	SSH1	protein phosphatase Slingshot homolog 1	2.14851	3.66086
7669550	P18206	VINC	vinculin isoform meta-VCL	2.15832	3.02541	1
4502557	Q16566	KCC4	calcium/calmodulin-dependent protein kinase type IV	2.25342	2.42718	1.13896
117938759	Q5JWF2	GNAS1	Guanine nucleotide-binding protein G(s) subunit alpha isoforms Xlas	2.29029	2.21904
117938759	P63092	GNAS2	Guanine nucleotide-binding protein G(s) subunit alpha isoforms short	2.29029	2.21904	1.43825
15431297	P26373	RL13	60S ribosomal protein L13	2.29767	3.30788	1.86629
157738649	P07197	NFM	neurofilament medium polypeptide	2.30964	2.65849
89357932	Q8N1N4	K2C78	keratin, type II cytoskeletal 78	2.34224	∞	1
294832006	P63151	2ABA	serine/threonine-protein phosphatase 2A 55 kDa regulatory subunit B alpha isoform	2.34605	2.49541	2.12105
42542403	Q8N6R0	EFNMT	methyltransferase-like protein 13	2.36983	5.90418	1.74365
29540562	Q7L311	ARMX2	armadillo repeat-containing X-linked protein 2	2.40248	4.51743	1
33946311	P57103	NAC3	sodium/calcium exchanger 3	2.40313	3.61851
39777597	P21980	TGM2	protein-glutamine gamma-glutamyltransferase 2	2.43694	4.28172	3.32141
116805340	P41250	GARS	glycine--tRNA ligase	2.50018	2.46803	2.43743
103471997	O95602	RPA1	DNA-directed RNA polymerase I subunit RPA1	2.56642	3.49798	9.42761
56090588	P23610	HAP40	factor VIII intron 22 protein	2.6063	5.71088
4885381	P16401	H15	histone H1.5	2.6314	1.71115	1
262073007	P53985	MOT1	monocarboxylate transporter 1	2.64966	9.99602	2.42785
22748641	Q8WUX9	CHMP7	charged multivesicular body protein 7	2.70616	4.97595
312283691	Q9ULP9	TBC24	TBC1 domain family member 24	2.71951	1.30707	1.80715
20149500	P08397	HEM3	porphobilinogen deaminase	2.82666	4.12694	3473.97
87240000	P42898	MTHR	methylenetetrahydrofolate reductase	2.83644	4.7349
153791502	Q9C0B7	TNG6	transport and Golgi organization 6 homolog	2.84649	∞
188528648	P22105	TENX	tenascin-X	2.84718	2.12602
41281564	Q9Y2I8	WDR37	WD repeat-containing protein 37	2.88957	8.42831	1.86497
21361794	Q86VP6	CAND1	cullin-associated NEDD8-dissociated protein 1	2.89074	2.77424	2.27626
14719402	Q15050	RRS1	ribosome biogenesis regulatory protein homolog	2.93486	3.86104	6047.93
7705704	Q9Y2Q3	GSTK1	glutathione S-transferase kappa 1	2.96451	0.981882	8.30291
221316632	P53618	COPB	coatomer subunit beta	3.0023	2.39186	1.79899
98986457	P51610	HCFC1	host cell factor 1	3.02031	2.88924	2.55363
47933397	P48449	LSS	lanosterol synthase	3.04364	2.9202	2.52937
7662078	Q6PGP7	SKI3	tetratricopeptide repeat protein 37	3.04864	3.7196	2.19754
4502549	P0DP23	CALM1	Calmodulin-1	3.09556	∞	3710.39
4502549	P0DP24	CALM2	Calmodulin-2	3.09556	∞	3710.39
4502549	P0DP25	CALM3	Calmodulin-3	3.09556	∞	3710.39
14917109	Q96CW1	AP2M1	AP-2 complex subunit mu	3.1709	1.58824	2.04572
38788372	O60306	AQR	intron-binding protein aquarius	3.17434	5.51269	1.6332
300360496	O00400	ACATN	acetyl-coenzyme A transporter 1	3.17448	10.2041
217330598	Q9HC38	GLOD4	glyoxalase domain-containing protein 4	3.19359	3.0329	5.36896
134142826	Q15154	PCM1	pericentriolar material 1 protein	3.27927	9.78633	1.85112
4503143	P07339	CATD	cathepsin D preproprotein	3.29528	2.04567	1
7705294	O94805	ACL6B	actin-like protein 6B	3.3128	1.75176	1.86869
51093863	Q96TA1	NIBA2	niban-like protein 1	3.34053	3.21806	4.36881
58331218	Q9BXP5	SRRT	serrate RNA effector molecule homolog	3.36804	2.96183	2.09528
4507791	P61081	UBC12	NEDD8-conjugating enzyme Ubc12	3.38162	4.14247	2.42141
157388914	Q9NWY4	HPF1	UPF0609 protein C4orf27	3.41728	3.66229	2.85441
57527756	Q5SWX8	ODR4	protein odr-4 homolog	3.50682	7.94215	3.46772
109698599	Q8IUR0	TPPC5	trafficking protein particle complex subunit 5	3.5329	7.08105	3437.07
4885111	P27482	CALL3	calmodulin-like protein 3	3.63858	∞
7019323	Q9Y673	ALG5	dolichyl-phosphate beta-glucosyltransferase	3.6549	4.99254	1
93102371	Q86U86	PB1	protein polybromo-1	3.65687	2.44175	5.26839
5454064	Q96PK6	RBM14	RNA-binding protein 14	3.65783	2.96468	4.49381
45331213	O60518	RNBP6	ran-binding protein 6	3.68519	3.14827	0.826852
118601081	Q1KMD3	HNRL2	heterogeneous nuclear ribonucleoprotein U-like protein 2	3.7802	2.14987	2.18295
164519084	Q9Y3P9	RBGP1	rab GTPase-activating protein 1	3.78696	3.90261	0.873668
387598087	Q9HA47	UCK1	uridine-cytidine kinase 1	3.80476	2.58658
119220564	O95948	ONEC2	one cut domain family member 2	3.80603	2.88914
13904866	P46779	RL28	60S ribosomal protein L28	3.81568	2.37499	1.65468
124378039	O15027	SC16A	protein transport protein Sec16A	3.82107	7.94246	7.39855
55749769	Q9HCG8	CWC22	pre-mRNA-splicing factor CWC22 homolog	3.85035	3.05969	1.12062
15811782	Q92917	GPKOW	G patch domain and KOW motifs-containing protein	3.85375	4.31938	1
31543164	Q86W42	THOC6	THO complex subunit 6 homolog	3.86837	5.22092	4.13722
59853099	Q05193	DYN1	dynamin-1	3.89783	3.71345	3.73727
11321585	P62873	GBB1	guanine nucleotide-binding protein G(I)/G(S)/G(T) subunit beta-1	3.90015	21.523	1.13708
394582093	P25205	MCM3	DNA replication licensing factor MCM3	4.02339	2.70463	1.53115
62243374	Q9Y6D9	MD1L1	mitotic spindle assembly checkpoint protein MAD1	4.07117	7.85385	2.33005
42822880	Q68D91	MBLC2	metallo-beta-lactamase domain-containing protein 2	4.09929	9.04261
21361619	Q9H0E2	TOLIP	toll-interacting protein	4.19841	10.6303	1.98626
4506633	P62899	RL31	60S ribosomal protein L31	4.21107	4.74547
55770888	Q15075	EEA1	early endosome antigen 1	4.22342	5.35688
194306651	Q8NCN5	PDPR	pyruvate dehydrogenase phosphatase regulatory subunit, mitochondrial	4.27261	3.92725	0.959032
27883866	Q9NPQ8	RIC8A	synembryn-A	4.28856	1.74658	2.06177
21396489	P36776	LONM	lon protease homolog, mitochondrial	4.30724	3.13136	2.26585
15451856	Q03135	CAV1	caveolin-1lpha	4.32521	∞
222144293	P52294	IMA5	importin subunit alpha-1	4.34611	2.79019	2.56424
4504301	P62805	H4	histone H4	4.36026	2.17302	1.86219
358356404	P61313	RL15	60S ribosomal protein L15	4.40394	2.44728	1.75199
24638454	P16615	AT2A2	sarcoplasmic/endoplasmic reticulum calcium ATPase 2	4.41226	3.61495	1.82101
357933602	Q14966	ZN638	zinc finger protein 638	4.4599	11.622	2266.04
20336477	Q8WUZ0	BCL7C	B-cell CLL/lymphoma 7 protein family member C	4.56463	∞
209862841	Q05084	ICA69	islet cell autoantigen 1	4.56539	5.50675	1
190014623	Q9Y2L1	RRP44	exosome complex exonuclease RRP44	4.57993	4.80655	1.76682
11496885	Q9NR12	PDLI7	PDZ and LIM domain protein 7	4.59003	1.59553	2.17773
41327715	Q96S44	PRPK	TP53-regulating kinase	4.62404	4.73398	1.59565
388240806	P78345	RPP38	ribonuclease P protein subunit p38	4.66163	17.934	2.43538
4507491	P52888	THOP1	thimet oligopeptidase	4.78725	5.43997	6.01637
4506067	P17252	KPCA	protein kinase C alpha type	4.81114	3.72335	1.73491
7019415	P61619	S61A1	protein transport protein Sec61 subunit alpha	4.95723	10.5028	2.63123
23110935	P25786	PSA1	proteasome subunit alpha type-1	4.95778	3.38617	1.98002
388240808	O95347	SMC2	structural maintenance of chromosomes protein 2	5.05356	2.90931	1.77369
31415882	Q96B26	EXOS8	exosome complex component RRP43	5.1241	4.62501	1.69688
7705706	Q71UM5	RS27L	40S ribosomal protein S27-like	5.13919	5.45442	2.24489
17017988	P10606	COX5B	cytochrome c oxidase subunit 5B, mitochondrial	5.14559	3.85851	1.41232
17921985	Q7KZN9	COX15	cytochrome c oxidase assembly protein COX15 homolog	5.1551	3.81327	3.03132
330688436	Q92556	ELMO1	engulfment and cell motility protein 1	5.15689	7.42865	1.67633
112421122	O75165	DJC13	dnaJ homolog subfamily C member 13	5.18338	4.27688	1.69542
4759034	P62495	ERF1	eukaryotic peptide chain release factor subunit 1	5.22421	3.74155	2.03875
5729939	O95639	CPSF4	cleavage and polyadenylation specificity factor subunit 4	5.30403	4.66859	2.99839
28178825	O75874	IDHC	isocitrate dehydrogenase [NADP] cytoplasmic	5.30662	2.98834	2.00518
55770844	P35221	CTNA1	catenin alpha-1	5.37122	4.45574	1.07792
186910286	Q5TBB1	RNH2B	ribonuclease H2 subunit B	5.41537	6.83196	2.08463
92859701	Q9UM54	MYO6	unconventional myosin-VI	5.47686	6.38802	1.82198
16117796	Q9Y3U8	RL36	60S ribosomal protein L36	5.50924	4.0342	1.67715
4758788	O75489	NDUS3	NADH dehydrogenase [ubiquinone] iron-sulfur protein 3, mitochondrial	5.51753	3.2204	1.80008
170296790	P35030	TRY3	trypsin-3 preproprotein	5.54815	∞	1.2552
335334964	A7E2V4	ZSWM8	zinc finger SWIM domain-containing protein 8	5.57917	5.20533
428977337	Q9Y312	AAR2	protein AAR2 homolog	5.6088	12.8253	5.04168
5730027	Q07666	KHDR1	KH domain-containing, RNA-binding, signal transduction-associated protein 1	5.64448	3.79625	2.61044
41350333	Q9BTW9	TBCD	tubulin-specific chaperone D	5.70058	5.76392	1.63139
56550043	Q14BN4	SLMAP	sarcolemmal membrane-associated protein	5.70804	2.45496	1
154448890	Q96FV9	THOC1	THO complex subunit 1	5.73315	4.37686	1.58022
94538362	Q14254	FLOT2	flotillin-2	5.73861	2.71365	1
82659109	Q5T4S7	UBR4	E3 ubiquitin-protein ligase UBR4	5.76836	3.67956	1.70068
106775678	Q6FI13	H2A2A	histone H2A type 2-A	5.87768	2.018
7662645	Q9Y676	RT18B	28S ribosomal protein S18b, mitochondrial	5.97814	22.9994	18564.9
157739942	Q8TEQ6	GEMI5	gem-associated protein 5	6.01323	3.90382	4.65913
4503065	Q14894	CRYM	thiomorpholine-carboxylate dehydrogenase	6.03595	15.9121
4505891	O60568	PLOD3	procollagen-lysine,2-oxoglutarate 5-dioxygenase 3	6.0527	3.41021	1.99955
209862871	Q9NXH9	TRM1	tRNA (guanine(26)-N(2))-dimethyltransferase	6.13006	10.6335	2.90633
4507947	P54577	SYYC	tyrosine--tRNA ligase, cytoplasmic	6.227	5.07157	2.73326
209862901	Q96LJ7	DHRS1	dehydrogenase/reductase SDR family member 1	6.25381	∞
12751497	Q9H7E9	CH033	UPF0488 protein C8orf33	6.29736	6.68211	1.45366
163659918	Q9NZJ4	SACS	sacsin	6.31816	4.86099	1.67837
150417996	A0AVT1	UBA6	ubiquitin-like modifier-activating enzyme 6	6.35163	3.31502	3.89698
4826940	P42785	PCP	lysosomal Pro-X carboxypeptidase preproprotein	6.37059	8.01462
4504517	P04792	HSPB1	heat shock protein beta-1	6.40118	4.70886	2.31634
47132591	Q16512	PKN1	serine/threonine-protein kinase N1	6.43064	4.40657	1.99126
6857820	P48426	PI42A	phosphatidylinositol 5-phosphate 4-kinase type-2 alpha	6.44288	∞
116284404	Q9C0A0	CNTP4	contactin-associated protein-like 4	6.55345	0.39778	2.70359
5454154	O43447	PPIH	peptidyl-prolyl cis-trans isomerase H	6.5779	3.17073	1.86636
38569394	O95163	ELP1	elongator complex protein 1	6.59815	4.12208	1.8038
55749742	Q9P2D3	HTR5B	HEAT repeat-containing protein 5B	6.64724	∞	0.4307
33946291	Q8NF37	PCAT1	lysophosphatidylcholine acyltransferase 1	6.65712	3.3778	2.10398
48255957	P23634	AT2B4	plasma membrane calcium-transporting ATPase 4b	6.67399	7.9359
67782311	Q15477	SKI2	helicase SKI2W	6.67502	5.72632	1.68445
119943104	Q92793	CBP	CREB-binding protein	6.76386	15.1474	2.38865
4885549	Q9Y243	AKT3	RAC-gamma serine/threonine-protein kinase	6.77612	2.74621	4397.28
4826730	P42345	MTOR	serine/threonine-protein kinase mTOR	6.80508	3.91878	2.21721
256600192	Q5T0N5	FBP1L	formin-binding protein 1-like	6.81217	2.99497
9910186	Q9NPA8	ENY2	enhancer of yellow 2 transcription factor homolog	6.81844	1.79128	2.64653
306482646	Q01130	SRSF2	serine/arginine-rich splicing factor 2	6.84217	8.96129	1.5245
46852388	Q8IX12	CCAR1	cell division cycle and apoptosis regulator protein 1	6.97846	7.21018	2.66918
189083778	P06396	GELS	gelsolin	7.01427	5.80769	2.49912
28559039	Q15648	MED1	mediator of RNA polymerase II transcription subunit 1	7.06647	6.65423	2.31877
171906569	Q96G97	BSCL2	seipin	7.07108	7.84813
41872500	P23743	DGKA	diacylglycerol kinase alpha	7.07341	∞	1.8755
422398832	Q15008	PSMD6	26S proteasome non-ATPase regulatory subunit 6	7.08874	4.97934	2.65365
5031573	P61158	ARP3	actin-related protein 3	7.10047	3.1344	3.34613
238624110	Q5QNW6	H2B2F	histone H2B type 2-F	7.13181	3.55005	2.15202
5729875	O00264	PGRC1	membrane-associated progesterone receptor component 1	7.14115	3.44358	4.71236
4504901	O00629	IMA3	importin subunit alpha-4	7.16162	37.9622	3.34251
19923830	Q96AQ6	PBIP1	pre-B-cell leukemia transcription factor-interacting protein 1	7.21752	50.0924	9.58517
67189747	Q02878	RL6	60S ribosomal protein L6	7.26843	5.72232	2.17383
507834101	Q14168	MPP2	MAGUK p55 subfamily member 2	7.27339	∞
20070125	P07237	PDIA1	protein disulfide-isomerase	7.27368	4.17999	2.25023
110618253	O00411	RPOM	DNA-directed RNA polymerase, mitochondrial	7.32848	1.44779	1.68514
29826321	P35611	ADDA	alpha-adducin	7.46667	5.65534	1.89403
4505995	O75688	PPM1B	protein phosphatase 1B	7.51577	4.63788	1.93053
262527242	O15533	TPSN	tapasin	7.59531	∞
30089972	Q15067	ACOX1	peroxisomal acyl-coenzyme A oxidase 1	7.79392	3.0023	11.2138
47717104	Q9UI12	VATH	V-type proton ATPase subunit H	7.8556	6.94773	4.47648
4503355	Q14185	DOCK1	dedicator of cytokinesis protein 1	7.92274	10.0518	1.69583
222831645	A6NHX0	CAST2	GATS-like protein 2	7.93288	∞	1
50658065	Q9NTJ3	SMC4	structural maintenance of chromosomes protein 4	7.9473	4.70097	1.76605
123173757	Q8IY67	RAVR1	ribonucleoprotein PTB-binding 1	8.06124	6.38745	1.02641
33356172	O60934	NBN	nibrin	8.08338	∞	3.48074
426214088	Q14257	RCN2	reticulocalbin-2	8.08408	∞	2.55656
40316839	Q8NB49	AT11C	probable phospholipid-transporting ATPase IG	8.08699	4.17332
51173724	Q13895	BYST	bystin	8.11523	6.04789	1.72483
31742501	Q96L92	SNX27	sorting nexin-27	8.20476	7.94633	2.11887
22202633	Q99471	PFD5	prefoldin subunit 5lpha	8.31251	9.19091	0.000896073
22749323	Q8NB16	MLKL	mixed lineage kinase domain-like protein	8.3765	∞
55769543	Q6P1L8	RM14	39S ribosomal protein L14, mitochondrial	8.40019	10.8465	2.3807
147904340	Q6UXN9	WDR82	WD repeat-containing protein 82	8.4205	6.0052	1.62713
7706497	P30085	KCY	UMP-CMP kinase	8.4688	3.20941	4357.74
4506609	P84098	RL19	60S ribosomal protein L19	8.46994	4.07313	1.89563
155969707	P14735	IDE	insulin-degrading enzyme	8.54467	8.04436	2.10796
7705720	Q9Y316	MEMO1	protein MEMO1	8.56277	∞	1.26332
4757818	O75348	VATG1	V-type proton ATPase subunit G 1	8.7157	6.01618	3.7763
42716275	A5YKK6	CNOT1	CCR4-NOT transcription complex subunit 1	8.74808	5.40307	0.999748
7657496	Q9UJ41	RABX5	rab5 GDP/GTP exchange factor	8.74908	16.6449
20070344	Q9BW92	SYTM	threonine--tRNA ligase, mitochondrial	8.96819	6.8339	2.04776
23111047	Q9Y5X3	SNX5	sorting nexin-5	8.99442	13.2476	1
50301240	Q01780	EXOSX	exosome component 10	9.10458	2.00164	1.61022
125988409	Q13123	RED	protein Red	9.16571	5.58885	1.63406
134142337	P33527	MRP1	multidrug resistance-associated protein 1	9.18177	5.70097	3.34215
11545859	Q9H4A6	GOLP3	Golgi phosphoprotein 3	9.19597	6.67399	2.2736
148352331	Q16181	SEPTIN7	septin-7	9.20388	6.38244	2.44329
5031653	O75934	SPF27	pre-mRNA-splicing factor SPF27	9.27939	7.95066	1.76609
4557831	P61457	PHS	pterin-4-alpha-carbinolamine dehydratase	9.30222	3.86157	2.33574
4758650	O60282	KIF5C	kinesin heavy chainC	9.40113	4.76738	1.97077
6912278	Q9UBI1	COMD3	COMM domain-containing protein 3	9.44679	2.2067	3.10489
331284170	Q9Y371	SHLB1	endophilin-B1	9.5002	5.35378	1
24475847	Q9Y6Y0	NS1BP	influenza virus NS1A-binding protein	9.56047	7.34341	1.41565
124256489	Q9BZJ0	CRNL1	crooked neck-like protein 1	9.5969	6.54609	1.79449
52487191	Q9BS26	ERP44	endoplasmic reticulum resident protein 44	9.66225	3.93638	2.1091
53759151	O00767	SCD	acyl-CoA desaturase	9.66226	4.49868	2.65237
15149476	P54136	SYRC	arginine--tRNA ligase, cytoplasmic	9.76183	3.58807	1.92044
24797086	O00410	IPO5	importin-5	9.8133	4.51365	2.11752
41281453	Q9H2G2	SLK	STE20-like serine/threonine-protein kinase	9.87531	5.40648
22538446	Q53FA7	QORX	quinone oxidoreductase PIG3	9.89525	8.73391	1
156523968	P09874	PARP1	poly [ADP-ribose] polymerase 1	10.0758	8.79251	1.76365
7657058	P49770	EI2BB	translation initiation factor eIF-2B subunit beta	10.1794	6.38066	1.55281
6274552	P42224	STAT1	signal transducer and activator of transcription 1-alpha/betalpha	10.185	4.60216	3.34611
63055049	Q96G03	PGM2	phosphoglucomutase-2	10.1881	5.79159	1.6219
283436222	Q9NVI7	ATD3A	ATPase family AAA domain-containing protein 3A	10.2388	6.59067	2.11389
109255228	Q5SW79	CE170	centrosomal protein of 170 kDalpha	10.4213	7.50448	1.764
17978479	Q9H269	VPS16	vacuolar protein sorting-associated protein 16 homolog	10.4295	6.23351	1.61268
21328448	P31946	1433B	14-3-3 protein beta/alpha	10.6304	3.25594	2.96342
148727341	Q9Y3F4	STRAP	serine-threonine kinase receptor-associated protein	10.7085	4.65774	0.972127
24307939	P48643	TCPE	T-complex protein 1 subunit epsilon	10.7483	3.99782	1.66867
260656032	Q8WX93	PALLD	palladin	10.8637	5.14995	2.60152
23308697	P08240	SRPRA	signal recognition particle receptor subunit alpha	10.8947	5.47954	2.1101
115527097	Q9Y5S2	MRCKB	serine/threonine-protein kinase MRCK beta	10.9606	5.55065	1.77662
4502891	P54105	ICLN	methylosome subunit pICln	10.9738	7.12952	3.07937
13129018	O75223	GGCT	gamma-glutamylcyclotransferase	11.0527	8.50782	4.21253
10880983	Q9NQX3	GEPH	gephyrin	11.1493	10.6095	2.53141
55769552	P05423	RPC4	DNA-directed RNA polymerase III subunit RPC4	11.1733	16.1407	1.90405
4506439	Q16576	RBBP7	histone-binding protein RBBP7	11.1988	38.8766	2.46075
48762932	P50990	TCPQ	T-complex protein 1 subunit theta	11.2248	4.66159	2.14066
264681563	Q9NQW7	XPP1	xaa-Pro aminopeptidase 1	11.3699	5.1914	2.23399
62751417	Q5HYI8	RABL3	rab-like protein 3	11.5046	6.46307	2.34684
11067749	Q15059	BRD3	bromodomain-containing protein 3	11.5628	5.57979	6135.84
4885457	Q13485	SMAD4	mothers against decapentaplegic homolog 4	11.5648	4.27848	2.02546
106879206	Q9H6W3	RIOX1	bifunctional lysine-specific demethylase and histidyl-hydroxylase NO66	11.5755	6.43467	2.15297
16117789	P49207	RL34	60S ribosomal protein L34	11.6705	6.64772	1.09886
36029914	Q96JH7	VCIP1	deubiquitinating protein VCIP135	11.7498	13.6084	0.912739
116256338	O94979	SC31A	protein transport protein Sec31A	11.7922	4.44581	1.88358
41393549	Q8NFP7	NUD10	diphosphoinositol polyphosphate phosphohydrolase 3-alpha	11.8373	3.15765
4506671	P05387	RLA2	60S acidic ribosomal protein P2	11.9757	10.6515	2.12406
188035910	P45973	CBX5	chromobox protein homolog 5	12.0473	4.27058	1.46206
12232385	Q9H9Q2	CSN7B	COP9 signalosome complex subunit 7b	12.0966	5.8304	5914.11
197304715	P52735	VAV2	guanine nucleotide exchange factor VAV2	12.1224	7.90427	1.85169
4505255	O43347	MSI1H	RNA-binding protein Musashi homolog 1	12.1233	∞	1.97488
157388927	Q9NWS8	RMND1	required for meiotic nuclear division protein 1 homolog	12.1639	5.21782	1.79996
149999606	Q13724	MOGS	mannosyl-oligosaccharide glucosidase	12.4122	5.73066	2.69322
7706057	Q9P0M9	RM27	39S ribosomal protein L27, mitochondrial	12.4217	21.0535
4826854	O95169	NDUB8	NADH dehydrogenase [ubiquinone] 1 beta subcomplex subunit 8, mitochondrial	12.4527	7.03497	1
58761544	O60341	KDM1A	lysine-specific histone demethylase 1A	12.552	3.91822	1.92061
4507783	P62256	UBE2H	ubiquitin-conjugating enzyme E2 H	12.5524	7.96791	0.00187926
31982936	O95470	SGPL1	sphingosine-1-phosphate lyase 1	12.5967	7.83308	1.95963
7706495	Q9UBS4	DJB11	dnaJ homolog subfamily B member 11	12.609	12.0873
23943872	Q8WU79	SMAP2	stromal membrane-associated protein 2	12.8065	5.47651	1751.71
20127408	P40939	ECHA	trifunctional enzyme subunit alpha, mitochondrial	12.8923	5.67688	2.20876
25121987	Q15003	CND2	condensin complex subunit 2	13.011	6.54529	1.92247
289547212	Q15042	RB3GP	rab3 GTPase-activating protein catalytic subunit	13.1084	4.72013	1.77414
13324688	Q9BZH6	WDR11	WD repeat-containing protein 11	13.1375	8.76973	1.46533
31881687	P35249	RFC4	replication factor C subunit 4	13.1598	12.3182	1.79005
41322916	Q15149	PLEC	plectin	13.1689	3.99862	2.03951
4506607	Q07020	RL18	60S ribosomal protein L18	13.2893	5.71908	1.97536
4885399	Q9UQE7	SMC3	structural maintenance of chromosomes protein 3	13.4522	4.76131	1.88407
51230412	Q6GYQ0	RGPA1	ral GTPase-activating protein subunit alpha-1	13.5817	4.94808	2.20109
16418381	Q4G0F5	VP26B	vacuolar protein sorting-associated protein 26B	13.6808	5.06222	2.74336
186972120	O14936	CSKP	peripheral plasma membrane protein CASK	13.8081	4.81996	1.97135
51479145	Q9Y6D6	BIG1	brefeldin A-inhibited guanine nucleotide-exchange protein 1	13.9166	5.8512	1.50711
23097240	Q9UFC0	LRWD1	leucine-rich repeat and WD repeat-containing protein 1	14.0462	8.54488	1.73436
4506189	O14818	PSA7	proteasome subunit alpha type-7	14.0679	4.38904	2.41105
4507869	P50552	VASP	vasodilator-stimulated phosphoprotein	14.156	13.9859	2.88493
68160937	Q14258	TRI25	E3 ubiquitin/ISG15 ligase TRIM25	14.1975	5.67784	1.73563
50428925	Q99426	TBCB	tubulin-folding cofactor B	14.2046	7.31193	2.38314
4758012	Q00610	CLH1	clathrin heavy chain 1	14.2296	2.90958	2.38834
41399285	P10809	CH60	60 kDa heat shock protein, mitochondrial	14.3646	4.61015	2.97063
194294540	Q9UNH6	SNX7	sorting nexin-7	14.508	9.89285	1
14150122	Q9BRT9	SLD5	DNA replication complex GINS protein SLD5	14.5172	∞	1
20270343	Q96BM9	ARL8A	ADP-ribosylation factor-like protein 8A	14.5471	∞
14141193	P46781	RS9	40S ribosomal protein S9	14.5734	2.88088	1.55969
9966779	Q9NR50	EI2BG	translation initiation factor eIF-2B subunit gamma	14.6059	6.52933	1.34038
337756501	Q6UB35	C1TM	monofunctional C1-tetrahydrofolate synthase, mitochondrial	14.714	5.09661	1.95212
19718766	Q05086	UBE3A	ubiquitin-protein ligase E3A	14.7364	8.79343	1.6414
109148542	P49588	SYAC	alanine--tRNA ligase, cytoplasmic	14.8385	4.75301	2.045
224994205	O76024	WFS1	wolframin	14.845	5.57447	995.53
51873036	Q02218	ODO1	2-oxoglutarate dehydrogenase, mitochondrial	15.0601	4.12574	2.29771
11641289	Q9H5Q4	TFB2M	dimethyladenosine transferase 2, mitochondrial	15.0919	5.21515	1.84639
15029520	P49590	SYHM	probable histidine--tRNA ligase, mitochondrial	15.2095	4.47175	2.58107
75709204	Q9Y6B6	SAR1B	GTP-binding protein SAR1b	15.3646	7.68628
109389364	Q9HBK9	AS3MT	arsenite methyltransferase	15.4302	8.62633	2.04864
5031877	P20700	LMNB1	lamin-B1	15.5286	3.06039	5.99669
31652264	Q5T8P6	RBM26	RNA-binding protein 26	16.2777	6.905	1.25215
4505689	Q15118	PDK1	[Pyruvate dehydrogenase [lipoamide]] kinase isozyme 1, mitochondrial	16.3235	4.58715	1
154354966	Q16891	MIC60	mitochondrial inner membrane protein	16.5595	6.23716	2.41114
4506641	P61927	RL37	60S ribosomal protein L37	16.6314	3.98158	1
5901892	O75717	WDHD1	WD repeat and HMG-box DNA-binding protein 1	17.2641	6.96871	1.6902
4502247	O00192	ARVC	armadillo repeat protein deleted in velo-cardio-facial syndrome	17.2799	10.936	2.1616
38788319	P36915	GNL1	guanine nucleotide-binding protein-like 1	17.31	4.5822	1.95557
7705805	Q9Y399	RT02	28S ribosomal protein S2, mitochondrial	17.3663	2.73994	3.1022
54607135	O94826	TOM70	mitochondrial import receptor subunit TOM70	17.504	5.29492	2.34096
21361657	P30101	PDIA3	protein disulfide-isomerase A3	17.5317	6.91223	2.36156
6677723	P40937	RFC5	replication factor C subunit 5	17.5571	6.81389	1.72855
225543461	Q9C0D5	TANC1	protein TANC1	17.5715	11.1846	2.0299
21264365	P52948	NUP98	nuclear pore complex protein Nup98-Nup96	17.5976	6.85133	3.11346
157671927	Q8NB90	AFG2A	spermatogenesis-associated protein 5	17.7059	11.0742	1.75525
4506029	O00743	PPP6	serine/threonine-protein phosphatase 6 catalytic subunit	17.7461	4.5487	2.70826
189083768	O95140	MFN2	mitofusin-2	17.7489	6.35655	2.17249
511630715	P46977	STT3A	dolichyl-diphosphooligosaccharide--protein glycosyltransferase subunit STT3A	17.8383	3.52388	2.30681
395394071	Q16762	THTR	thiosulfate sulfurtransferase	17.9058	8.51831	1
12667788	P35579	MYH9	myosin-9	17.9094	5.10637	1.69723
14211923	Q9BX68	HINT2	histidine triad nucleotide-binding protein 2, mitochondrial	17.9316	4.16766	1.3674
22538465	P49720	PSB3	proteasome subunit beta type-3	18.0609	6.14709	1
68800430	Q53T59	H1BP3	HCLS1-binding protein 3	18.3354	5.45943	1
54234024	Q96JC1	VPS39	vam6/Vps39-like protein	18.4339	7.32645	2.17626
37595752	Q14739	LBR	lamin-B receptor	18.4799	3.75882	2.44517
296179427	Q16836	HCDH	hydroxyacyl-coenzyme A dehydrogenase, mitochondrial	18.4893	3.44544	3.05218
94721336	Q96T51	RUFY1	RUN and FYVE domain-containing protein 1	18.9224	0.471236	1.93785
41281398	Q9UQ13	SHOC2	leucine-rich repeat protein SHOC-2	19.0381	∞	1.94299
56676393	P52566	GDIR2	rho GDP-dissociation inhibitor 2	19.0634	7.32216
53759148	Q15291	RBBP5	retinoblastoma-binding protein 5	19.3339	5.16644	2.23348
87578396	P11137	MTAP2	microtubule-associated protein 2	19.3715	6.54462	2.15138
23618867	Q9H9B4	SFXN1	sideroflexin-1	19.4084	8.79035	3.67516
68226422	Q969M3	YIPF5	protein YIPF5	19.4732	5.37327	1.19522
39780552	Q08AM6	VAC14	protein VAC14 homolog	19.558	4.02545	2.99729
148839305	A6NHR9	SMHD1	structural maintenance of chromosomes flexible hinge domain-containing protein 1	19.691	6.6779	1.80803
98986464	P49755	TMEDA	transmembrane emp24 domain-containing protein 10	19.8361	3.97877	10.5175
16554611	P82914	RT15	28S ribosomal protein S15, mitochondrial	19.8561	4.76449	2.20752
76880486	Q8N3C0	ASCC3	activating signal cointegrator 1 complex subunit 3	19.9757	6.75893	1.93974
377520143	Q9NUQ9	CYRIB	protein FAM49B	20.175	8.10275	2.44785
74027257	O60828	PQBP1	polyglutamine-binding protein 1	20.2071	11.1354	2.37255
225543166	Q9Y512	SAM50	sorting and assembly machinery component 50 homolog	20.2511	7.89212	1.93013
4502315	P21283	VATC1	V-type proton ATPase subunit C 1	20.3019	6.87541	2.00793
51599156	Q14839	CHD4	chromodomain-helicase-DNA-binding protein 4	20.6103	5.15125	2.12244
4504511	P31689	DNJA1	dnaJ homolog subfamily A member 1	20.6113	4.41825	1.66609
384475521	P29401	TKT	transketolase	20.7798	4.84352	2.95209
214010173	Q7Z460	CLAP1	CLIP-associating protein 1	20.9334	5.66231	1.83005
32307148	O15294	OGT1	UDP-N-acetylglucosamine--peptide N-acetylglucosaminyltransferase 110 kDa subunit	21.1825	9.48305	2.50865
19923193	P50502	F10A1	hsc70-interacting protein	21.2936	6.13074	2.34471
4759100	Q05519	SRS11	serine/arginine-rich splicing factor 11	21.445	4.45594	1.64447
300934881	Q9H9C1	SPE39	spermatogenesis-defective protein 39 homolog	21.5622	7.85016	1.59334
114796644	P18754	RCC1	regulator of chromosome condensation	21.6029	4.49298	2.34943
209862851	P13797	PLST	plastin-3	21.6793	6.00762	1.83062
42716280	Q00341	VIGLN	vigilin	21.7296	3.66041	1.64618
53729346	Q13835	PKP1	plakophilin-1b	21.889	2.54618	2.14341
62414289	P08670	VIME	vimentin	22.0038	4.42375	3.90385
42741648	O60613	Selenoprotein F	Selenoprotein F	22.3926	∞	0.371288
150456473	Q96N16	JKIP1	janus kinase and microtubule-interacting protein 1	22.4047	7.09131
21361709	Q96P16	RPR1A	regulation of nuclear pre-mRNA domain-containing protein 1A	22.4555	7.97175	1.861
84043963	O60841	IF2P	eukaryotic translation initiation factor 5B	22.4678	7.24841	1.89279
39930541	Q9BUH6	PAXX	uncharacterized protein C9orf142	22.4698	8.45747	1
38327552	Q13283	G3BP1	ras GTPase-activating protein-binding protein 1	22.597	4.6517	1.82724
4557367	Q13867	BLMH	bleomycin hydrolase	22.6871	3.08937	0.912882
61744477	P08195	4F2	4F2 cell-surface antigen heavy chain	22.7151	5.71359	1.57203
325301072	P51571	SSRD	translocon-associated protein subunit delta	22.9174	3.97012	0.00064176
24415404	Q9NU22	MDN1	midasin	22.9334	10.9519	2.36021
4505185	P14174	MIF	macrophage migration inhibitory factor	23.0144	2.55257	1.42768
4506133	O60256	KPRB	phosphoribosyl pyrophosphate synthase-associated protein 2	23.0334	4.4777	1.50604
289547589	Q15147	PLCB4	1-phosphatidylinositol 4,5-bisphosphate phosphodiesterase beta-4	23.143	7.71124	1.88438
18104948	P46778	RL21	60S ribosomal protein L21	23.1448	4.59332	2.1265
222136641	Q8TD19	NEK9	serine/threonine-protein kinase Nek9	23.3451	3.06308	1.72206
295844834	Q9UJ70	NAGK	N-acetyl-D-glucosamine kinase	23.3696	4.17465	2.806
194097350	P12814	ACTN1	alpha-actinin-1	23.4552	4.06423	2.37467
295821216	P05166	PCCB	propionyl-CoA carboxylase beta chain, mitochondrial	23.6315	3.34343	2.07865
4885153	P46109	CRKL	crk-like protein	23.7694	5.35082	3.35449
188536080	P80404	GABT	4-aminobutyrate aminotransferase, mitochondrial	23.9191	3.96358	3.46623
148470406	P52597	HNRPF	heterogeneous nuclear ribonucleoprotein F	24.0776	4.69907	1.60845
6005794	O60831	PRAF2	PRA1 family protein 2	24.143	2.28952	1
385428859	Q9UBC2	EP15R	epidermal growth factor receptor substrate 15-like 1	24.523	8.85661	1
157502193	Q9UNM6	PSD13	26S proteasome non-ATPase regulatory subunit 13	24.8774	4.77362	3.04835
50592994	P10599	THIO	thioredoxin	24.8813	7.80519	2.33477
39995082	Q08J23	NSUN2	tRNA (cytosine(34)-C(5))-methyltransferase	24.9216	4.96496	1.50964
4826659	P47756	CAPZB	F-actin-capping protein subunit beta	25.0193	4.64538	2.81804
320202988	P14550	AK1A1	alcohol dehydrogenase [NADP(+)]	25.0396	6.50439	1.39278
24430132	Q969T9	WBP2	WW domain-binding protein 2	25.0571	19.6099	1
194578909	P06730	IF4E	eukaryotic translation initiation factor 4E	25.0782	7.79498	3.13078
10047102	Q9UHA3	RLP24	probable ribosome biogenesis protein RLP24	25.105	5.26833	3.21941
19913424	P38606	VATA	V-type proton ATPase catalytic subunit A	25.1082	3.79478	11785.8
9910460	Q9NQR4	NIT2	omega-amidase NIT2	25.1907	4.29475	1.92691
4758340	Q9Y285	SYFA	phenylalanine--tRNA ligase alpha subunit	25.2155	5.97457	2.03027
256222411	O75369	FLNB	filamin-B	25.2647	5.98349	4.92814
14165439	P61978	HNRPK	heterogeneous nuclear ribonucleoprotein K	25.2849	4.20677	1.95521
5453994	O60216	RAD21	double-strand-break repair protein rad21 homolog	25.3066	5.7011	1.74268
14277700	P25398	RS12	40S ribosomal protein S12	25.3117	12.7274	2.32034
115387114	P61371	ISL1	insulin gene enhancer protein ISL-1	25.4536	6.63824	2.70426
186700623	Q3YEC7	RABL6	rab-like protein 6	25.6783	10.1424	2.82693
394025723	P49748	ACADV	very long-chain specific acyl-CoA dehydrogenase, mitochondrial	25.7791	7.2574	1.25447
118150660	Q8WU90	ZC3HF	zinc finger CCCH domain-containing protein 15	25.7806	∞	5.04356
6912734	Q9Y5L0	TNPO3	transportin-3	25.8711	3.76052	1.65875
510025481	Q9Y2H6	FND3A	fibronectin type-III domain-containing protein 3A	25.9227	3.46992	9.39961
13899354	Q9BQ04	RBM4B	RNA-binding protein 4B	26.0453	5.69689	1.47204
190014603	Q9NVG8	TBC13	TBC1 domain family member 13	26.0677	7.30385	1
21327715	O14776	TCRG1	transcription elongation regulator 1	26.2256	4.90282	3.75653
46852147	Q9NSE4	SYIM	isoleucine--tRNA ligase, mitochondrial	26.5794	4.62763	1.98161
6912634	P40429	RL13A	60S ribosomal protein L13a	26.6064	5.84985	2.20762
16950603	P82673	RT35	28S ribosomal protein S35, mitochondrial	26.674	6.10645	2.64206
5454084	O15269	SPTC1	serine palmitoyltransferase 1	26.7048	4.75771	2.20489
148612835	O43670	ZN207	zinc finger protein 207	26.7139	4.60095	1.53261
62234461	Q9NVX2	NLE1	notchless protein homolog 1	26.879	2.29745	14.3267
112382250	Q01082	SPTB2	spectrin beta chain, non-erythrocytic 1	27.0213	4.4478	2.40887
149944496	O94888	UBXN7	UBX domain-containing protein 7	27.4476	5.96529	1.38632
4507729	Q13885	TBB2A	tubulin beta-2A chain	27.5714	5.13282	2314.96
18860916	Q9H0D6	XRN2	5'-3' exoribonuclease 2	27.727	4.1058	1.58393
4505695	O15530	PDPK1	3-phosphoinositide-dependent protein kinase 1	27.7824	6.69206	1.76551
45827771	Q6P2E9	EDC4	enhancer of mRNA-decapping protein 4	27.9022	6.87952	1.83905
62198235	Q9UJU6	DBNL	drebrin-like protein	28.029	6.46654	2.33185
14043070	P09651	ROA1	heterogeneous nuclear ribonucleoprotein A1	28.0512	2.88239	1.48374
23199998	Q96P11	NSUN5	putative methyltransferase NSUN5	28.1616	5.2873
218083233	Q9BWS9	CHID1	chitinase domain-containing protein 1	28.2124	2.40191	1.70081
84000432	Q658Y4	F91A1	protein FAM91A1	28.2898	2.44592	2.02113
54112117	O75533	SF3B1	splicing factor 3B subunit 1	28.2904	4.5506	1.54471
13124873	Q13951	PEBB	core-binding factor subunit beta	28.3218	4.50707	2.49387
17149836	P62942	FKB1A	peptidyl-prolyl cis-trans isomerase FKBP1A	28.4439	6.22207	1
75709220	Q05048	CSTF1	cleavage stimulation factor subunit 1	28.5194	9.13559	2.35699
21264337	Q8WWN8	ARAP3	arf-GAP with Rho-GAP domain, ANK repeat and PH domain-containing protein 3	29.2993	5.27795	2.26052
26051229	Q13084	RM28	39S ribosomal protein L28, mitochondrial	29.3588	14.3937	2.62855
20270253	Q9H1I8	ASCC2	activating signal cointegrator 1 complex subunit 2	29.4695	7.36592	2.18438
209862837	P07099	HYEP	epoxide hydrolase 1	29.4768	7.34099
7706563	Q92930	RAB8B	ras-related protein Rab-8B	29.5172	4.03781
156627581	O95801	TTC4	tetratricopeptide repeat protein 4	29.5684	8.75339	1.76885
46094081	Q9ULH1	ASAP1	arf-GAP with SH3 domain, ANK repeat and PH domain-containing protein 1	29.5937	10.851	2.35666
39777606	Q92888	ARHG1	rho guanine nucleotide exchange factor 1	29.6412	24.394	1.8168
347360922	Q9Y4A5	TRRAP	transformation/transcription domain-associated protein	29.9062	5.1477	1.71163
5453629	Q13561	DCTN2	dynactin subunit 2	30.0393	10.0695	3.7618
62530384	P42126	ECI1	enoyl-CoA delta isomerase 1, mitochondrial	30.055	10.8681	8.00572
291621657	Q8TDJ6	DMXL2	dmX-like protein 2	30.2628	7.39372	1.90647
25777732	P05091	ALDH2	aldehyde dehydrogenase, mitochondrial	30.5248	4.91458	2.7093
16554629	P61964	WDR5	WD repeat-containing protein 5	30.5423	5.2499	2.3521
14702171	P19387	RPB3	DNA-directed RNA polymerase II subunit RPB3	30.7445	3.84605	10.52
46195765	Q70J99	UN13D	protein unc-13 homolog D	30.7544	8.56344	10.4801
10835073	P30419	NMT1	glycylpeptide N-tetradecanoyltransferase 1	30.882	7.46091	5.87965
20149680	Q9HA64	KT3K	ketosamine-3-kinase	30.9926	6.22154	2.88686
94538322	Q16775	GLO2	hydroxyacylglutathione hydrolase, mitochondrial	31.0377	3.00217
253970500	Q01844	EWS	RNA-binding protein EWS	31.1482	4.8838	2.95346
33188445	Q9UPN3	MACF1	microtubule-actin cross-linking factor 1	31.1655	4.76142	1.82628
5802974	P30048	PRDX3	thioredoxin-dependent peroxide reductase, mitochondrial	31.4999	7.26796	1.22411
188219591	P31483	TIA1	Cytotoxic granule associated RNA binding protein TIA1	31.5411	0.3655	4.67689
4503483	P13639	EF2	elongation factor 2	31.6359	3.83307	2.622
46852174	Q9Y496	KIF3A	kinesin-like protein KIF3A	31.7321	5.6036	1.71363
160948599	Q8N201	INT1	integrator complex subunit 1	31.8144	7.97192	1.57269
38327029	Q14139	UBE4A	ubiquitin conjugation factor E4 A	31.949	10.4972	1.88825
7661872	Q15031	SYLM	probable leucine--tRNA ligase, mitochondrial	32.1084	6.61628	1.43052
24308201	Q9HDC9	APMAP	adipocyte plasma membrane-associated protein	32.1249	4.66749	2.4073
4885649	Q9UBT2	SAE2	SUMO-activating enzyme subunit 2	32.2142	4.40999	4.08678
47106067	Q6PL24	TMED8	protein TMED8	32.3105	17.704	1
30581135	Q14683	SMC1A	structural maintenance of chromosomes protein 1A	32.4258	8.10981	1.76926
34577063	P30520	PURA2	adenylosuccinate synthetase isozyme 2	32.5723	7.6416	7.5768
156139135	Q7Z3D6	GLUCM	UPF0317 protein C14orf159, mitochondrial	33.1177	5.61385
383087736	Q9Y276	BCS1	mitochondrial chaperone BCS1	33.1829	4.66881
40217847	O75643	U520	U5 small nuclear ribonucleoprotein 200 kDa helicase	33.2793	3.76394	1.48024
334724463	Q12792	TWF1	twinfilin-1	33.5173	5.94271	2.57159
338968930	O75534	CSDE1	cold shock domain-containing protein E1	33.6728	5.3977	1.84975
21361356	Q15785	TOM34	mitochondrial import receptor subunit TOM34	33.6958	3.6212	2.21895
109638749	O76094	SRP72	signal recognition particle subunit SRP72	33.8713	7.31612	1.63186
40254924	Q96AG4	LRC59	leucine-rich repeat-containing protein 59	33.8833	4.3553	2.08638
14141170	O94776	MTA2	metastasis-associated protein MTA2	34.1147	7.2039	2.41617
4506901	P84103	SRSF3	serine/arginine-rich splicing factor 3	34.1258	2.85763	1.92581
7661808	Q9NPD8	UBE2T	ubiquitin-conjugating enzyme E2 T	34.4024	8.29848	1.96757
37620194	Q96EK6	GNA1	glucosamine 6-phosphate N-acetyltransferase	34.5316	8.50897	2.7924
117968420	Q9BZD4	NUF2	kinetochore protein Nuf2	34.5982	10.3772	6.57066
4502211	P62330	ARF6	ADP-ribosylation factor 6	34.6181	5.35331	3.93208
4507373	Q15814	TBCC	tubulin-specific chaperone C	34.7403	9.22176	6530.31
14141152	P52272	HNRPM	heterogeneous nuclear ribonucleoprotein M	34.7739	5.73455	2.11716
19913412	Q14764	MVP	major vault protein	34.8101	6.96373
27262628	P49321	NASP	nuclear autoantigenic sperm protein	34.9127	5.66524	1.53085
120659785	Q9BZL6	KPCD2	serine/threonine-protein kinase D2	35.0334	9.40768	2.18022
62865858	Q8IWS0	PHF6	PHD finger protein 6	35.1733	3.61229	1.82874
294459921	P62979	RS27A	ubiquitin-40S ribosomal protein S27a	35.343	6.50814	2.09648
16933546	P05388	RLA0	60S acidic ribosomal protein P0	35.4546	4.1947	2.66877
7019569	Q9UN37	VPS4A	vacuolar protein sorting-associated protein 4A	35.5945	11.1855	2.16655
32483399	Q13177	PAK2	serine/threonine-protein kinase PAK 2	35.6496	8.8058	1579.34
11067747	Q99459	CDC5L	cell division cycle 5-like protein	35.8809	6.4697	1.79242
9943848	Q9UEY8	ADDG	gamma-adducin	35.9931	1.69168	4.53313
19913414	O95782	AP2A1	AP-2 complex subunit alpha-1	36.2097	4.25801	1.66124
293336691	Q92769	HDAC2	histone deacetylase 2	36.3399	5.24648	2.24374
13027378	P46926	GNPI1	glucosamine-6-phosphate isomerase 1	36.3742	5.24179	2.73352
62955833	Q5TDH0	DDI2	protein DDI1 homolog 2	36.5394	13.4915	1
4758958	P13861	KAP2	cAMP-dependent protein kinase type II-alpha regulatory subunit	36.6282	4.02837	2.07117
16579885	P36578	RL4	60S ribosomal protein L4	36.7664	4.0968	1.72966
56713254	Q6YP21	KAT3	kynurenine--oxoglutarate transaminase 3	36.7812	5.50989	2.51023
70166852	P55265	DSRAD	double-stranded RNA-specific adenosine deaminase	36.8499	3.66791	1.93776
110227613	Q96P47	AGAP3	arf-GAP with GTPase, ANK repeat and PH domain-containing protein 3	37.309	8.127	1.89738
50658084	O15382	BCAT2	branched-chain-amino-acid aminotransferase, mitochondrial	37.4762	12.5936	1
4506661	P62424	RL7A	60S ribosomal protein L7a	37.5692	4.30172	2.21222
311771714	O43432	IF4G3	eukaryotic translation initiation factor 4 gamma 3	37.6946	4.40579	1.59783
197333761	Q99829	CPNE1	copine-1	37.9362	3.87826	3.59782
431822403	P08238	HS90B	heat shock protein HSP 90-beta	37.9879	3.63798	2.07569
28144897	Q9Y6K8	KAD5	adenylate kinase isoenzyme 5	38.0662	5.6152
219555707	P63241	IF5A1	eukaryotic translation initiation factor 5A-1	38.1526	2.20852	1.59316
38372909	Q7LBC6	KDM3B	lysine-specific demethylase 3B	38.2596	12.332	4.76983
4503023	P23786	CPT2	carnitine O-palmitoyltransferase 2, mitochondrial	38.5848	4.44656	1.88183
118402586	Q04760	LGUL	lactoylglutathione lyase	38.783	3.68403	2.71165
217272863	O15460	P4HA2	prolyl 4-hydroxylase subunit alpha-2	38.8499	9.20591
41327764	O43488	ARK72	aflatoxin B1 aldehyde reductase member 2	38.9775	8.33086	2.56923
61676188	Q7Z6Z7	HUWE1	E3 ubiquitin-protein ligase HUWE1	39.3309	6.25473	2.47801
14110407	O14979	HNRDL	heterogeneous nuclear ribonucleoprotein D-like	39.4457	4.16898	2.20277
367460087	P35580	MYH10	myosin-10	39.508	4.86889	1.59335
4507943	O14980	XPO1	exportin-1	39.5128	5.14204	2.81574
19924129	Q92878	RAD50	DNA repair protein RAD50	39.755	7.20007	1.85552
20127448	Q14181	DPOA2	DNA polymerase alpha subunit B	39.8793	15.9243	1.4568
54112121	Q15393	SF3B3	splicing factor 3B subunit 3	40.0796	4.14696	2.37141
18079218	Q9BZF1	OSBL8	oxysterol-binding protein-related protein 8	40.3215	12.9785	1.77206
38569417	Q5JTZ9	SYAM	alanine--tRNA ligase, mitochondrial	40.4077	5.65436	2.64799
4506203	Q99436	PSB7	proteasome subunit beta type-7 proprotein	40.4783	10.5208	1
6005824	Q9Y6Y8	S23IP	SEC23-interacting protein	40.5847	4.60925	2.11266
192448443	Q96AY3	FKB10	peptidyl-prolyl cis-trans isomerase FKBP10	40.6744	1.86261	1
55741709	P49756	RBM25	RNA-binding protein 25	40.9702	12.0705	1.88749
4507797	Q15819	UB2V2	ubiquitin-conjugating enzyme E2 variant 2	41.0437	7.33116	1.50089
10835063	P06748	NPM	nucleophosmin	41.1051	3.97536	1.88263
15431306	P62917	RL8	60S ribosomal protein L8	41.2272	2.55197	1.86794
21396487	Q7L592	NDUF7	NADH dehydrogenase [ubiquinone] complex I, assembly factor 7	41.317	6.2364	2.24146
116534900	P09172	DOPO	dopamine beta-hydroxylase	41.3722	4.88097	1.9326
37537716	P55010	IF5	eukaryotic translation initiation factor 5	41.3813	4.40491	2.26723
56549640	Q15019	SEPTIN2	septin-2	41.4028	5.86153	1.48875
27545315	Q9BSH4	TACO1	translational activator of cytochrome c oxidase 1	41.4526	3.10638	1.49552
316659409	P63261	ACTG	actin, cytoplasmic 2	41.5041	2.75712	2.74641
208879465	Q9Y277	VDAC3	voltage-dependent anion-selective channel protein 3	41.5947	5.5851	2.39607
4504079	O43292	GPAA1	glycosylphosphatidylinositol anchor attachment 1 protein	41.6613	3.46696	1.85885
71774197	Q96K76	UBP47	ubiquitin carboxyl-terminal hydrolase 47	41.8032	6.76543	1
21361368	P54886	P5CS	delta-1-pyrroline-5-carboxylate synthase	41.8788	5.44551	1.53314
153792590	P07900	HS90A	heat shock protein HSP 90-alpha	42.3479	3.37819	2.94712
71361682	Q14980	NUMA1	nuclear mitotic apparatus protein 1	42.559	4.9304	1.83244
124028529	Q92797	SYMPK	symplekin	43.2778	11.406	0.00154677
13129100	Q9H773	DCTP1	dCTP pyrophosphatase 1	43.7947	12.8486	2287.77
223718046	Q9UPT5	EXOC7	exocyst complex component 7	43.9639	3.10468	1.65794
108936958	P61962	DCAF7	DDB1- and CUL4-associated factor 7	44.2284	7.43782	2.08962
48255889	P14314	GLU2B	glucosidase 2 subunit beta	44.3464	3.81815	1
146231940	O60716	CTND1	catenin delta-1ABC	44.4956	4.71753	1.74094
11225260	P11387	TOP1	DNA topoisomerase 1	44.4978	4.60188	1.63598
48255931	Q7Z4V5	HDGR2	hepatoma-derived growth factor-related protein 2	44.4987	6.15697	2.45103
4885583	Q13464	ROCK1	rho-associated protein kinase 1	44.6698	7.20246	1.55608
4759212	O75347	TBCA	tubulin-specific chaperone A	44.8757	4.53153	1
338827685	O94973	AP2A2	AP-2 complex subunit alpha-2	44.9205	6.02442	1.60915
29029559	P55060	XPO2	exportin-2	45.0611	3.84542	3.02683
15431301	P18124	RL7	60S ribosomal protein L7	45.086	4.90685	1.83223
23308577	O43175	SERA	D-3-phosphoglycerate dehydrogenase	45.2221	5.67281	2.40234
31621305	P42704	LPPRC	leucine-rich PPR motif-containing protein, mitochondrial	45.2761	4.33354	2.26554
4826878	O95747	OXSR1	serine/threonine-protein kinase OSR1	45.5656	6.18455	1.96341
69354671	Q8NE71	ABCF1	ATP-binding cassette sub-family F member 1	45.7137	6.50652	1.63011
4507651	P67936	TPM4	tropomyosin alpha-4 chain	45.7901	7.88676	2.28309
354983493	P22061	PIMT	protein-L-isoaspartate(D-aspartate) O-methyltransferase	46.0802	1.29224	3.37197
41872631	P49327	FAS	fatty acid synthase	46.1842	3.91493	1.73801
4758148	O00273	DFFA	DNA fragmentation factor subunit alpha	46.2902	1.94592	3278.87
24308013	Q10713	MPPA	mitochondrial-processing peptidase subunit alpha	46.3665	5.09516	2.07226
8923911	Q9NS86	LANC2	lanC-like protein 2	46.7722	5.86684	1.45572
40805864	O43399	TPD54	tumor protein D54	46.9265	25.3376	2.25747
4757732	O95831	AIFM1	apoptosis-inducing factor 1, mitochondrial	47.171	6.24744	1.76479
77695912	Q01085	TIAR	nucleolysin TIAR	47.4097	8.84069	1.88613
4505531	P22059	OSBP1	oxysterol-binding protein 1	47.4995	8.29214	1.88601
7706427	Q9UKF6	CPSF3	cleavage and polyadenylation specificity factor subunit 3	48.0602	7.66138	1.86612
4507297	P61764	STXB1	syntaxin-binding protein 1	48.25	4.51964	2.11835
8393009	Q9UID3	VPS51	vacuolar protein sorting-associated protein 51 homolog	48.3652	18.0477	1.89496
7706645	Q9Y570	PPME1	protein phosphatase methylesterase 1	48.3687	5.43653
88703041	Q9UNH7	SNX6	sorting nexin-6	48.9521	5.30519	3.41658
208431827	P19525	E2AK2	interferon-induced, double-stranded RNA-activated protein kinase	48.9858	5.51696	1.7745
58331202	P62834	RAP1A	ras-related protein Rap-1A	49.0213	4.10028	3394.55
158937236	P55786	PSA	puromycin-sensitive aminopeptidase	49.0459	5.68066	3.09739
150417981	Q9NRY4	RHG35	rho GTPase-activating protein 35	49.0739	8.21477	2.3562
5174613	Q99733	NP1L4	nucleosome assembly protein 1-like 4	49.09	5.02718	2.34004
19913408	Q02880	TOP2B	DNA topoisomerase 2-beta	49.5889	13.4093	1.2606
5453603	P78371	TCPB	T-complex protein 1 subunit beta	49.7347	4.72118	1.96661
5031755	O43390	HNRPR	heterogeneous nuclear ribonucleoprotein R	49.9965	4.8834	2.24313
24307983	Q8N1G2	CMTR1	cap-specific mRNA (nucleoside-2'-O-)-methyltransferase 1	50.2221	6.48584	1.54516
56181387	Q9UNE7	CHIP	E3 ubiquitin-protein ligase CHIP	50.2887	4.11606	2.04375
7706143	Q9P291	ARMX1	armadillo repeat-containing X-linked protein 1	50.3207	23.9979	1.75213
253970489	Q9NR19	ACSA	acetyl-coenzyme A synthetase, cytoplasmic	50.487	16.9323	2.41038
13569962	Q9H0U4	RAB1B	ras-related protein Rab-1B	50.6457	10.5329	2.28926
195927037	P26358	DNMT1	DNA (cytosine-5)-methyltransferase 1	51.0801	4.52202	1.71629
217272849	P13674	P4HA1	prolyl 4-hydroxylase subunit alpha-1	51.1293	8.05191	2.3511
8922701	Q53H12	AGK	acylglycerol kinase, mitochondrial	51.1697	7.30507	2.20221
23308579	Q15185	TEBP	prostaglandin E synthase 3	51.2517	2.78504	1.92365
4757900	P27797	CALR	calreticulin	51.2994	6.01714	7.8849
22035590	Q96A35	RM24	39S ribosomal protein L24, mitochondrial	51.3098	5.55036	5.05241
4885585	Q9UBE0	SAE1	SUMO-activating enzyme subunit 1	51.3136	5.17214	11.4027
124028525	Q9NSD9	SYFB	phenylalanine--tRNA ligase beta subunit	51.4735	3.45329	1.82541
41327781	Q9BU61	NDUF3	NADH dehydrogenase [ubiquinone] 1 alpha subcomplex assembly factor 3	51.775	4.55268	1
10092677	Q96GD0	PLPP	pyridoxal phosphate phosphatase	52.2329	9.72471	2.98587
4506707	P62851	RS25	40S ribosomal protein S25	52.2613	5.93472	2.12026
194595509	Q13813	SPTN1	spectrin alpha chain, non-erythrocytic 1	52.3575	5.48651	2.16933
91208426	Q6P2Q9	PRP8	pre-mRNA-processing-splicing factor 8	52.3722	4.88498	1.7156
62460633	Q9UPN6	SCAF8	protein SCAF8	52.4276	1.80209	1.81329
50511943	Q9NQT5	EXOS3	exosome complex component RRP40	52.4723	12.0227	1.99437
221316723	Q9H0A0	NAT10	N-acetyltransferase 10	52.5208	6.99493	2.95751
74136883	Q00839	HNRPU	heterogeneous nuclear ribonucleoprotein U	52.5633	4.85811	1.53411
33350932	Q14204	DYHC1	cytoplasmic dynein 1 heavy chain 1	52.5774	4.96554	2.01161
208431833	Q13310	PABP4	polyadenylate-binding protein 4	52.5827	4.7262	2.69575
84875539	P11908	PRPS2	ribose-phosphate pyrophosphokinase 2	52.7185	4.07024	1.61804
195972883	P51178	PLCD1	1-phosphatidylinositol 4,5-bisphosphate phosphodiesterase delta-1	53.2397	4.47101	1
33469966	Q8WVM8	SCFD1	sec1 family domain-containing protein 1	53.3503	6.18883	2.24962
34147513	P51149	RAB7A	ras-related protein Rab-7a	53.8351	5.47566	2.43189
260436831	P11171	EPB41	protein 4.1	54.0464	7.95263	2.9171
4504191	P52701	MSH6	DNA mismatch repair protein Msh6	54.2243	4.61992	1.49369
8923040	Q9NXV6	CARF	CDKN2A-interacting protein	54.2972	9.62146	1.48986
15991831	P19367	HXK1	hexokinase-1	54.7831	4.78852	1.7351
4507813	O60701	UGDH	UDP-glucose 6-dehydrogenase	54.8292	5.89862	3.13637
154090976	Q6SZW1	SARM1	sterile alpha and TIR motif-containing protein 1	55.092	6.42735	1.97603
14042943	Q6P1N9	TATD1	putative deoxyribonuclease TATDN1	55.155	16.956	2.66428
51093832	Q14C86	GAPD1	GTPase-activating protein and VPS9 domain-containing protein 1	55.2247	6.99249	2.78843
116805322	Q14315	FLNC	filamin-C	55.3148	7.47535	2.56405
90903231	P42858	HD	huntingtin	55.3301	7.407	2.64525
14043072	P22626	ROA2	heterogeneous nuclear ribonucleoproteins A2/B11	55.5605	3.3977	1.61318
168229252	P08243	ASNS	asparagine synthetase [glutamine-hydrolyzing]	55.7039	3.86079	1.92351
37693993	Q13232	NDK3	nucleoside diphosphate kinase 3	55.9618	8.48147	2.15422
156938343	Q9Y4G6	TLN2	talin-2	56.0591	7.80882	2.09382
6912328	O94760	DDAH1	N(G),N(G)-dimethylarginine dimethylaminohydrolase 1	56.2387	6.15451	2.46776
311771639	Q13617	CUL2	cullin-2	56.65	5.74852	1.68597
4557761	P43246	MSH2	DNA mismatch repair protein Msh2	57.1765	5.28541	1.75301
11863154	P48444	COPD	coatomer subunit delta	57.4357	4.74287	2.42569
5453998	O95373	IPO7	importin-7	57.5552	4.45552	2.61861
260763922	P28289	TMOD1	tropomodulin-1	57.5919	9.8167	3.22775
4506715	P62857	RS28	40S ribosomal protein S28	57.6584	3.94193	1.55549
72534670	Q9Y263	PLAP	phospholipase A-2-activating protein	57.8937	8.90332	2.51712
7661960	P50748	KNTC1	kinetochore-associated protein 1	58.6054	6.80382	2.13088
4503937	O75323	NIPS2	protein NipSnap homolog 2	58.6149	4.09928	1.44777
156105689	P22033	MUTA	methylmalonyl-CoA mutase, mitochondrial	58.6434	6.97853	2.41907
240120050	O43795	MYO1B	unconventional myosin-Ib	58.8663	5.09738	1.82621
5729980	Q15126	PMVK	phosphomevalonate kinase	58.9004	7.04153	2.03737
154759421	Q99873	ANM1	protein arginine N-methyltransferase 1	58.968	4.66838	1.82957
194239674	Q08257	QOR	quinone oxidoreductase	59.0084	6.91217	1
5032087	Q15459	SF3A1	splicing factor 3A subunit 1	59.0146	10.9256	2.64525
4507677	P14625	ENPL	endoplasmin	59.0962	4.29642	2.3641
38683855	Q96EY7	PTCD3	pentatricopeptide repeat domain-containing protein 3, mitochondrial	59.12	6.60519	1.93939
21361181	P05023	AT1A1	sodium/potassium-transporting ATPase subunit alpha-1	59.4916	10.1056	2.91659
19923445	Q8WXF7	ATLA1	atlastin-1	59.5011	2.83499	1
18105007	P27708	PYR1	CAD protein	59.9743	6.35322	1.82022
38570062	Q7L5D6	GET4	Golgi to ER traffic protein 4 homolog	60.8325	10.417	3.45433
4505357	O00483	NDUA4	NADH dehydrogenase [ubiquinone] 1 alpha subcomplex subunit 4	61.0355	2.90439	1.82754
7706333	Q96GC5	RM48	39S ribosomal protein L48, mitochondrial	61.2232	5.5508	1.88182
4506921	O43765	SGTA	small glutamine-rich tetratricopeptide repeat-containing protein alpha	61.3368	2.72729	1.76353
4505145	P23368	MAOM	NAD-dependent malic enzyme, mitochondrial	61.4408	5.12818	2.97994
346644849	P27695	APEX1	DNA-(apurinic or apyrimidinic site) lyase	61.446	3.77695	2.50563
4503971	P31150	GDIA	rab GDP dissociation inhibitor alpha	61.5306	6.48014	2.5443
10835057	P41227	NAA10	N-alpha-acetyltransferase 10	61.5986	5.87081	2.24171
4506289	P18031	PTN1	tyrosine-protein phosphatase non-receptor type 1	61.6007	4.88544	2.53268
355390313	Q14160	SCRIB	protein scribble homolog	61.6948	12.0097	3.30445
4759158	P62316	SMD2	small nuclear ribonucleoprotein Sm D2	62.1104	4.05574	1.77793
379030588	P28340	DPOD1	DNA polymerase delta catalytic subunit	62.235	4.16119	2.05754
4885063	P09972	ALDOC	fructose-bisphosphate aldolase C	62.3718	5.17366	3.09157
24308257	Q9HCJ6	VAT1L	synaptic vesicle membrane protein VAT-1 homolog-like	62.5581	1.7698
5902122	O15020	SPTN2	spectrin beta chain, non-erythrocytic 2	63.0218	7.30823	1.62679
33356177	Q06124	PTN11	tyrosine-protein phosphatase non-receptor type 11	63.0546	4.5276	2.59566
20373175	Q96DH6	MSI2H	RNA-binding protein Musashi homolog 2	63.1277	2.12821	1.95723
4557014	P04040	CATA	catalase	63.6016	6.08136	1
4503841	P12956	XRCC6	X-ray repair cross-complementing protein 6	63.9191	4.03353	2.40774
4506411	P46060	RAGP1	ran GTPase-activating protein 1	64.0329	11.4913	2.47694
514052670	O15145	ARPC3	actin-related protein 2/3 complex subunit 3	64.1189	4.91027	4.03916
300192933	Q9Y4W6	AFG32	AFG3-like protein 2	64.2035	5.67687	2.45326
11545863	Q9HCC0	MCCB	methylcrotonoyl-CoA carboxylase beta chain, mitochondrial	64.3373	5.01652	1.91218
25777602	Q13200	PSMD2	26S proteasome non-ATPase regulatory subunit 2	64.3531	5.00137	2.48386
41872583	O75116	ROCK2	rho-associated protein kinase 2	64.6209	8.79307	1.91067
7242140	O76031	CLPX	ATP-dependent Clp protease ATP-binding subunit clpX-like, mitochondrial	64.8737	7.27559	2.71668
7657234	O00193	SMAP	small acidic protein	64.9524	15.2732	0.00312734
4885049	P68032	ACTC	actin, alpha cardiac muscle 1 proprotein	65.043	2.5786
18375673	Q92900	RENT1	regulator of nonsense transcripts 1	65.1245	5.06024	2.16705
16507237	P11021	BIP	78 kDa glucose-regulated protein	66.3924	6.03243	2.07013
57242761	Q13546	RIPK1	receptor-interacting serine/threonine-protein kinase 1	66.5266	4.97529	2.54594
4506193	P20618	PSB1	proteasome subunit beta type-1	66.8062	8.48947	2.28461
45439359	O75962	TRIO	triple functional domain protein	67.1187	6.38302	2.45863
4503727	Q00688	FKBP3	peptidyl-prolyl cis-trans isomerase FKBP3	67.184	9.24107	3.31291
7657347	Q9Y6C9	MTCH2	mitochondrial carrier homolog 2	67.4378	4.00421	1.59538
4506743	P62241	RS8	40S ribosomal protein S8	67.6678	3.78733	1.92052
4506761	P60903	S10AA	protein S100-A10	67.6679	6.62206	1.8489
156071459	P05141	ADT2	ADP/ATP translocase 2	67.7894	3.69327	2.16585
47132585	P31323	KAP3	cAMP-dependent protein kinase type II-beta regulatory subunit	68.05	7.01166	3.0504
8051636	O43592	XPOT	exportin-T	68.262	5.65722	2.82799
4501993	O00116	ADAS	Alkyldihydroxyacetonephosphate synthase	68.4686	7.05665	1.89631
10567816	P09471	GNAO	guanine nucleotide-binding protein G(o) subunit alpha	68.7414	3.78591	1.55204
4506701	P62266	RS23	40S ribosomal protein S23	68.8872	1.86569	1.95806
116812577	Q9Y383	LC7L2	putative RNA-binding protein Luc7-like 2	68.9636	3.70276	2.1092
19923748	P36957	ODO2	dihydrolipoyllysine-residue succinyltransferase component of 2-oxoglutarate dehydrogenase complex, mitochondrial	69.0559	6.91793	3.17111
11321601	Q01813	PFKAP	6-phosphofructokinase type C	69.2368	6.60972	1.94497
5031985	P61970	NTF2	nuclear transport factor 2	69.2898	5.87616	2.01553
148233338	P35222	CTNB1	catenin beta-1	69.3031	5.41623	5217.77
7669492	P04406	G3P	glyceraldehyde-3-phosphate dehydrogenase	70.0919	5.36082	1.35044
4758442	P60983	GMFB	glia maturation factor beta	70.1384	13.7384	2.10201
20070220	O14744	ANM5	protein arginine N-methyltransferase 5	70.3212	5.70769	2.37076
29570791	P68400	CSK21	casein kinase II subunit alpha	70.741	4.74848	3.47896
8922601	Q9NVJ2	ARL8B	ADP-ribosylation factor-like protein 8B	70.8634	6.10867	1
109452587	Q52LJ0	FA98B	protein FAM98B	71.0994	6.00452	1.96212
195976805	Q9Y4L1	HYOU1	hypoxia up-regulated protein 1	71.1149	5.47563	3.24231
7706254	Q9Y2X3	NOP58	nucleolar protein 58	71.4085	4.85914	1.97055
386642862	P26639	SYTC	threonine--tRNA ligase, cytoplasmic	71.4308	4.17965	2.07806
14589900	P52564	MP2K6	dual specificity mitogen-activated protein kinase kinase 6	71.4964	17.2166	2.28334
4557735	P21397	AOFA	amine oxidase [flavin-containing] A	71.722	6.17535	1.86725
4826960	P47897	SYQ	glutamine--tRNA ligase	71.7998	4.72173	1.88282
87196351	O00571	DDX3X	ATP-dependent RNA helicase DDX3X	72.5957	3.8376	1.8015
4758950	P23284	PPIB	peptidyl-prolyl cis-trans isomerase B	73.2504	5.13596	2.15361
27597085	P09493	TPM1	tropomyosin alpha-1 chain	73.2819	12.6807	2.92451
118572613	Q9UQ35	SRRM2	serine/arginine repetitive matrix protein 2	73.3367	6.38568	1.67717
393715091	Q71U36	TBA1A	tubulin alpha-1A chain	74.4285	3.05282	1.85953
61835148	P51114	FXR1	fragile X mental retardation syndrome-related protein 1	74.4393	4.49591	1.46721
63162572	P49368	TCPG	T-complex protein 1 subunit gamma	74.6232	4.15321	1.98766
27477070	O14981	BTAF1	TATA-binding protein-associated factor 172	74.7337	4.96951	2.19851
71773106	P63010	AP2B1	AP-2 complex subunit beta	75.0067	4.82254	2.38001
24475816	Q9NZ01	TECR	very-long-chain enoyl-CoA reductase	75.0797	5.12956	1.54098
217416402	Q9BTE6	AASD1	PTGES3L-AARSD1 protein	75.6765	5.88483	7.09662
4505029	P09960	LKHA4	leukotriene A-4 hydrolase	76.0477	6.93076	2.07963
320461711	Q06830	PRDX1	peroxiredoxin-1	76.2839	8.01478	2.26135
224831253	O60313	OPA1	dynamin-like 120 kDa protein, mitochondrial	76.5483	5.31697	1.65037
5453880	P39687	AN32A	acidic leucine-rich nuclear phosphoprotein 32 family member A	76.8308	1.12186	3.75567
5031571	P61160	ARP2	actin-related protein 2	76.9347	5.04257	2.63584
221625487	P29218	IMPA1	inositol monophosphatase 1	77.0344	14.9212	985.21
5803167	Q12874	SF3A3	splicing factor 3A subunit 3	77.3443	5.48479	1.58263
387849337	O14617	AP3D1	AP-3 complex subunit delta-1	77.3915	6.1438	1.81461
14165266	Q9UGV2	NDRG3	protein NDRG3	77.6687	5.5672	1722.15
4504897	P52292	IMA1	importin subunit alpha-2	77.8639	8.41958	2.24582
5031815	Q15046	SYK	lysine--tRNA ligase	77.8737	4.68061	2.31322
132814448	P20711	DDC	aromatic-L-amino-acid decarboxylase	77.9025	4.57565	2.12589
30410792	Q9UL46	PSME2	proteasome activator complex subunit 2	78.3693	5.93586	1650.74
503774453	Q8IZL8	PELP1	proline-, glutamic acid- and leucine-rich protein 1	78.6867	2.95532	2.52715
38455427	P50991	TCPD	T-complex protein 1 subunit delta	80.0708	4.80997	1.94354
4503729	Q02790	FKBP4	peptidyl-prolyl cis-trans isomerase FKBP4	80.2414	3.55061	2.04244
29788785	P07437	TBB5	tubulin beta chain	80.5364	3.54899	2.02348
190194363	O14531	DPYL4	dihydropyrimidinase-related protein 4	80.6201	4.47712	3.60311
66346730	P12532	KCRU	creatine kinase U-type, mitochondrial	80.9043	6.7393	1.97801
223029410	Q9Y490	TLN1	talin-1	81.3879	2.45691	2.57048
4503571	P06733	ENOA	alpha-enolase	81.8502	6.21074	2.78878
21265070	Q5T653	RM02	39S ribosomal protein L2, mitochondrial	81.9907	4.28686	3.45175
38327634	Q9NVP1	DDX18	ATP-dependent RNA helicase DDX18	82.1338	3.01127	2.07458
122937263	Q9C0B1	FTO	alpha-ketoglutarate-dependent dioxygenase FTO	83.0083	5.23658	0.932856
189491744	Q5VIR6	VPS53	vacuolar protein sorting-associated protein 53 homolog	83.8582	7.85789	2.08458
38045898	Q8IUD2	RB6I2	ELKS/Rab6-interacting/CAST family member 1psilon	84.2702	7.27479	2.75375
5174447	P63244	RACK1	guanine nucleotide-binding protein subunit beta-2-like 1	84.2744	4.58197	1.82496
22095331	Q8N766	EMC1	ER membrane protein complex subunit 1	84.8096	6.99731	3.8517
187960098	P11310	ACADM	medium-chain specific acyl-CoA dehydrogenase, mitochondrial	85.1156	6.92898	2.69098
224028246	Q15233	NONO	non-POU domain-containing octamer-binding protein	85.9741	6.05106	1.78439
122937227	O15042	SR140	U2 snRNP-associated SURP motif-containing protein	86.1388	5.44639	1.6793
4505621	P30086	PEBP1	phosphatidylethanolamine-binding protein 1 preproprotein	86.9442	3.01912	2.45754
4506753	Q9Y265	RUVB1	ruvB-like 1	86.9814	4.46157	2.28212
431822375	Q96N67	DOCK7	dedicator of cytokinesis protein 7	87.6091	5.63909	1.70759
50592996	Q13509	TBB3	tubulin beta-3 chain	88.2345	5.18501	1.80669
14790119	P42574	CASP3	caspase-3 preproprotein	88.3791	7.79997	5.50617
4503529	P60842	IF4A1	eukaryotic initiation factor 4A-I	88.403	4.62554	2.18819
6005942	P55072	TERA	transitional endoplasmic reticulum ATPase	88.698	4.70471	2.77884
296841136	Q99447	PCY2	ethanolamine-phosphate cytidylyltransferase	88.8041	4.37093	3.43775
110611220	Q9P2E9	RRBP1	ribosome-binding protein 1	89.5134	9.26106	1.77571
226529917	P60174	TPIS	triosephosphate isomerase	89.6065	3.42931	1.30549
156086724	Q684P5	RPGP2	rap1 GTPase-activating protein 2	90.6469	4.60477	1
21361517	Q04323	UBXN1	UBX domain-containing protein 1	91.1375	4.77692	1.28951
15011936	P62854	RS26	40S ribosomal protein S26	92.2788	5.04306	2.09518
156627571	Q00796	DHSO	sorbitol dehydrogenase	92.323	6.94026	2.1722
311893365	P07384	CAN1	calpain-1 catalytic subunit	92.5685	4.68034	2.22133
7330335	Q9Y696	CLIC4	chloride intracellular channel protein 4	92.8718	3.75456	3.51923
24497620	Q9UHB9	SRP68	signal recognition particle subunit SRP68	92.8826	5.33569	1.60146
392494084	P56537	IF6	eukaryotic translation initiation factor 6	92.9388	4.54737	2.53395
6005842	O94903	PLPHP	proline synthase co-transcribed bacterial homolog protein	93.1123	4.80678	1
32189392	P32119	PRDX2	peroxiredoxin-2	93.2274	4.76724	1.85371
46276893	Q15370	ELOB	transcription elongation factor B polypeptide 2	93.4526	4.4392	12547.6
27262649	Q8WWM7	ATX2L	ataxin-2-like protein	93.6311	5.60529	1.82322
5803181	P31948	STIP1	stress-induced-phosphoprotein 1	93.9271	4.85071	2.38688
251831110	P00403	COX2	cytochrome c oxidase subunit II	93.9728	7.21412	3.02979
14149738	Q9BYT8	NEUL	neurolysin, mitochondrial	94.6291	2.8175	2.72134
4506619	P83731	RL24	60S ribosomal protein L24	95.3602	4.93597	1.73133
332164775	P14618	KPYM	pyruvate kinase isozymes M1/M2	95.7773	4.63371	1.80132
13027604	P82930	RT34	28S ribosomal protein S34, mitochondrial	95.8551	1.05674	2.2261
10835067	P05455	LA	lupus La protein	95.9227	5.11267	2.44802
34485722	O00505	IMA4	importin subunit alpha-3	95.951	4.5682	2.39175
14141168	Q15366	PCBP2	poly(rC)-binding protein 2	96.3984	3.96406	2.05364
34101288	Q9P2I0	CPSF2	cleavage and polyadenylation specificity factor subunit 2	96.5972	6.85025	1.96123
4506711	P42677	RS27	40S ribosomal protein S27	96.9187	4.81711	2.10197
50845388	P07355	ANXA2	annexin A2	97.2764	5.0457	2.19398
91718899	P27361	MK03	mitogen-activated protein kinase 3	98.1631	7.86081	5034.8
4503471	P68104	EF1A1	elongation factor 1-alpha 1	98.2367	3.32211	1.82997
345842524	Q12756	KIF1A	kinesin-like protein KIF1A	98.2685	4.29086	2.61583
108773810	Q9P2J5	SYLC	leucine--tRNA ligase, cytoplasmic	98.6719	5.7873	1.93332
332000015	P54619	AAKG1	5'-AMP-activated protein kinase subunit gamma-1	98.7626	6.44202	1.98197
33149324	P61077	UB2D3	ubiquitin-conjugating enzyme E2 D3	98.8935	4.45522	2.36038
193794814	P04075	ALDOA	fructose-bisphosphate aldolase A	98.9368	4.20516	2.20963
8922886	Q9NUU7	DD19A	ATP-dependent RNA helicase DDX19A	98.9621	5.65114	2.46485
21361091	P09936	UCHL1	ubiquitin carboxyl-terminal hydrolase isozyme L1	98.9622	5.07753	2.58848
66932916	P28482	MK01	mitogen-activated protein kinase 1	99.0656	5.91077	2.87734
5031595	P59998	ARPC4	actin-related protein 2/3 complex subunit 4	99.8615	5.37449	2.54487
167001643	Q03426	KIME	mevalonate kinase	100.129	3.82966	1.85935
371872752	Q9UM00	TMCO1	transmembrane and coiled-coil domain-containing protein 1	100.309	5.023	1.90891
145553959	Q9BQ52	RNZ2	zinc phosphodiesterase ELAC protein 2	100.39	10.1207	1.52497
4557741	P43034	LIS1	platelet-activating factor acetylhydrolase IB subunit alpha	100.77	4.10585	2.99197
11321583	Q9P2R7	SUCB1	succinyl-CoA ligase [ADP-forming] subunit beta, mitochondrial	100.938	6.15149	2.43546
24119203	P06753	TPM3	tropomyosin alpha-3 chain	101.659	9.69522	2.71686
4502209	P84085	ARF5	ADP-ribosylation factor 5	101.941	3.22914	1
4826898	P07737	PROF1	profilin-1	102.099	4.81773	2.31955
295821202	P35520	CBS	cystathionine beta-synthase	102.109	4.25519	2.14778
54607053	Q92616	GCN1	translational activator GCN1	103.302	5.34763	3.00917
13904870	P46782	RS5	40S ribosomal protein S5	103.31	4.17304	2.58961
388240801	Q03252	LMNB2	lamin-B2	103.333	4.4589	2.14898
148298764	Q01581	HMCS1	hydroxymethylglutaryl-CoA synthase, cytoplasmic	104.691	7.97791	0.438035
11415026	Q02543	RL18A	60S ribosomal protein L18a	104.783	6.36495	1.26273
4809279	P20073	ANXA7	annexin A7	105.157	3.59652	1.14315
4557495	Q12996	CSTF3	cleavage stimulation factor subunit 3	105.242	6.94754	6.61924
183227678	Q99497	PARK7	protein DJ-1	105.51	4.05607	1.64598
333470719	Q7L1Q6	5MP2	basic leucine zipper and W2 domain-containing protein 1	106.764	6.11924	2.034
4506691	P62249	RS16	40S ribosomal protein S16	107.032	4.55903	1.63539
83376130	P24534	EF1B	elongation factor 1-beta	107.288	7.34052	2.20164
11559925	Q9NQH7	XPP3	probable Xaa-Pro aminopeptidase 3	108.681	2.95414	3.24237
38683807	O75179	ANR17	ankyrin repeat domain-containing protein 17	109.256	4.0884	1.85522
24307961	O43156	TTI1	TELO2-interacting protein 1 homolog	109.327	8.15102	1.69707
73466520	P51648	AL3A2	fatty aldehyde dehydrogenase	109.857	8.36426	2.06638
4827050	P54578	UBP14	ubiquitin carboxyl-terminal hydrolase 14	110.08	5.52444	3.34531
29788768	Q9BVA1	TBB2B	tubulin beta-2B chain	110.161	4.2574	1.68094
148529014	Q16531	DDB1	DNA damage-binding protein 1	110.516	4.9902	2.92644
5454088	Q92688	AN32B	acidic leucine-rich nuclear phosphoprotein 32 family member B	110.654	4.75517	2.52823
72534712	Q969X5	ERGI1	endoplasmic reticulum-Golgi intermediate compartment protein 1	110.875	4.67544	1.65626
41349456	P48147	PPCE	prolyl endopeptidase	111.125	4.95532	2.24502
4506749	P23921	RIR1	ribonucleoside-diphosphate reductase large subunit	111.295	5.99942	2.3783
4506929	Q99961	SH3G1	endophilin-A2	111.419	4.08932	2.49238
16117791	P18077	RL35A	60S ribosomal protein L35a	111.432	6.19297	2.05539
14110414	Q14103	HNRPD	heterogeneous nuclear ribonucleoprotein D0	112.707	4.80811	1.835
156564403	P11177	ODPB	pyruvate dehydrogenase E1 component subunit beta, mitochondrial	112.858	4.92108	2.6979
189409150	Q9NZZ3	CHMP5	charged multivesicular body protein 5	113.521	6.10247
469608410	P37802	TAGL2	transgelin-2	113.565	8.54886	2.24007
300192961	Q9UBW7	ZMYM2	zinc finger MYM-type protein 2	113.991	6.62535	2.09847
296841091	Q9UNF0	PACN2	protein kinase C and casein kinase substrate in neurons protein 2	114.141	4.63853	1
4506685	P62277	RS13	40S ribosomal protein S13	115.033	3.62313	1.93248
17402893	Q9Y617	SERC	phosphoserine aminotransferase	115.074	5.91808	3.09277
21464101	P61981	1433G	14-3-3 protein gamma	115.377	7.70987	2.31283
66346679	Q8NC51	SERB1	plasminogen activator inhibitor 1 RNA-binding protein	115.621	8.13976	2.0771
14165270	Q9BYD1	RM13	39S ribosomal protein L13, mitochondrial	116.05	6.40397	1
157412328	Q9ULV4	COR1C	coronin-1C	116.067	3.75015	1.52217
33239451	P12004	PCNA	proliferating cell nuclear antigen	117.361	5.35555	2.58435
58761500	Q9NTK5	OLA1	obg-like ATPase 1	117.613	4.09542	2.20289
373251164	O94925	GLSK	glutaminase kidney isoform, mitochondrial	118.455	3.53365	3.03309
186972143	P29144	TPP2	tripeptidyl-peptidase 2	118.51	5.57931	2.49829
217035105	Q9NVH1	DJC11	dnaJ homolog subfamily C member 11	119.053	4.73074	2.5386
162417971	Q15005	SPCS2	signal peptidase complex subunit 2	119.124	3.76122	2.5424
4505257	P26038	MOES	moesin	119.921	14.6875	1.43523
82880658	Q0VDF9	HSP7E	heat shock 70 kDa protein 14	119.978	19.5241	1.91603
5031635	P23528	COF1	cofilin-1	120.135	4.88944	2.0974
6598323	P50395	GDIB	rab GDP dissociation inhibitor beta	120.42	4.89367	2.89963
4506723	P61247	RS3A	40S ribosomal protein S3a	120.448	5.42571	1.57252
50659095	Q9NR30	DDX21	nucleolar RNA helicase 2	120.61	6.55009	2.09392
222352151	Q15365	PCBP1	poly(rC)-binding protein 1	121.725	2.48766	2.17223
19913371	Q9BZK7	TBL1R	F-box-like/WD repeat-containing protein TBL1XR1	121.775	4.31232	3.31514
83367072	P55884	EIF3B	eukaryotic translation initiation factor 3 subunit B	122.637	4.51584	2.13091
15431290	P62913	RL11	60S ribosomal protein L11	122.987	5.83035	33322.5
110349738	Q9Y6E0	STK24	serine/threonine-protein kinase 24	123.006	4.35796	2.00924
4506625	P46776	RL27A	60S ribosomal protein L27a	123.182	5.06725	1.89555
194097365	Q8IY81	SPB1	pre-rRNA processing protein FTSJ3	124.343	6.78212	2.08381
25777713	P63208	SKP1	S-phase kinase-associated protein 1	124.935	8.90473	3.42798
358439409	P62380	TBPL1	TATA box-binding protein-like protein 1	125.059	4.63896	2.11276
5803227	P27348	1433T	14-3-3 protein theta	125.507	4.99583	2.6671
160420317	P21333	FLNA	filamin-A	125.689	5.55393	2.24421
15553127	P52789	HXK2	hexokinase-2	125.788	6.5552	2.39982
4506675	P04843	RPN1	dolichyl-diphosphooligosaccharide--protein glycosyltransferase subunit 1	125.881	5.26934	1.17476
5803011	P09104	ENOG	gamma-enolase	126.333	13.108	1932.04
24111250	Q14344	GNA13	guanine nucleotide-binding protein subunit alpha-13	127.117	3.73975	2.21396
4758356	P39748	FEN1	flap endonuclease 1	127.185	4.99999	1.87447
308818195	Q16555	DPYL2	dihydropyrimidinase-related protein 2	128.664	5.09716	2.449
39995084	Q68E01	INT3	integrator complex subunit 3	129.017	6.05895	2.27538
5729877	P11142	HSPA8	heat shock cognate 71 kDa protein	129.33	5.78463	2.29795
5031857	P00338	LDHA	L-lactate dehydrogenase A chain	129.558	4.58611
260064013	P31350	RIR2	ribonucleoside-diphosphate reductase subunit M2	130.826	6.27559	3794.17
45446747	Q86XP3	DDX42	ATP-dependent RNA helicase DDX42	131.067	5.63233	2.03643
4503243	Q16850	CP51A	lanosterol 14-alpha demethylase	131.17	3.75738	0.975892
66933016	P12268	IMDH2	inosine-5'-monophosphate dehydrogenase 2	131.363	6.23759	1.65675
209869995	P22102	PUR2	trifunctional purine biosynthetic protein adenosine-3	131.627	3.83491	2.3577
9910280	Q9NYU2	UGGG1	UDP-glucose:glycoprotein glucosyltransferase 1	131.671	5.76549	1.61199
4504183	P09211	GSTP1	glutathione S-transferase P	132.101	3.68972	2.86519
4506401	P04049	RAF1	RAF proto-oncogene serine/threonine-protein kinase	132.326	4.97362	2.26726
21361144	P17980	PRS6A	26S protease regulatory subunit 6A	132.481	6.48668	2.94916
155722983	Q12931	TRAP1	heat shock protein 75 kDa, mitochondrial	132.506	4.76241	3.11652
10863927	P62937	PPIA	peptidyl-prolyl cis-trans isomerase A	133.79	4.21588	2.73302
4826932	Q08752	PPID	peptidyl-prolyl cis-trans isomerase D	135.015	3.1502	2.6517
13654237	P78527	PRKDC	DNA-dependent protein kinase catalytic subunit	136.99	4.91076	1.55399
262206280	Q99615	DNJC7	dnaJ homolog subfamily C member 7	137.129	5.93605	1.78664
23111034	Q13596	SNX1	sorting nexin-1	137.327	7.21732	8.73328
4885413	P49773	HINT1	histidine triad nucleotide-binding protein 1	137.363	4.58175	2544.45
19923790	Q9H2M9	RBGPR	rab3 GTPase-activating protein non-catalytic subunit	137.614	5.65383	2.14308
5901926	O43809	CPSF5	cleavage and polyadenylation specificity factor subunit 5	137.742	5.86972	2.32695
45387945	A0FGR8	ESYT2	extended synaptotagmin-2	138.379	5.3706	11553.8
118498356	Q86UP2	KTN1	kinectin	138.867	7.94625	2.46423
171906582	Q96A33	CCD47	coiled-coil domain-containing protein 47	139.544	6.4426	2.18878
193211600	P35813	PPM1A	protein phosphatase 1A	141.002	9.28055	3.11657
38176300	P48681	NEST	nestin	141.07	5.15265	2.31866
57863257	P17987	TCPA	T-complex protein 1 subunit alpha	141.364	5.6542	1.98662
55956921	Q99729	ROAA	heterogeneous nuclear ribonucleoprotein A/B	141.891	4.2488	1.98786
5031981	O00487	PSDE	26S proteasome non-ATPase regulatory subunit 14	142.458	6.74973	3.00455
71773329	P08133	ANXA6	annexin A6	143.522	4.35469	3.72217
224589127	P57088	TMM33	transmembrane protein 33	144.05	3.64611	2.05201
39780588	Q2NL82	TSR1	pre-rRNA-processing protein TSR1 homolog	144.402	6.71622	2.72496
219842262	P61201	CSN2	COP9 signalosome complex subunit 2	145.734	6.69106	2.61627
195963398	Q9Y2Z0	SGT1	Protein SGT1 homolog	146.74	5.12994	7362.54
20357568	Q9NRN7	ADPPT	L-aminoadipate-semialdehyde dehydrogenase-phosphopantetheinyl transferase	147.279	2.14896	1.7239
55749531	Q13435	SF3B2	splicing factor 3B subunit 2	147.884	4.7119	1.88582
9951915	P23526	SAHH	adenosylhomocysteinase	147.894	5.03951	1.7703
117647226	Q7L0Y3	TM10C	mitochondrial ribonuclease P protein 1	149.5	4.49907	1.81907
148491091	Q6NUK1	SCMC1	calcium-binding mitochondrial carrier protein SCaMC-1	149.539	2.77382	2.22304
71772415	P62244	RS15A	40S ribosomal protein S15a	149.591	5.88265	1.91565
296317244	Q9BSJ8	ESYT1	extended synaptotagmin-1	150.571	5.78945	5.92621
4504169	P48637	GSHB	glutathione synthetase	150.573	64.9698
4758762	O43776	SYNC	asparagine--tRNA ligase, cytoplasmic	151.587	5.18695	1.76415
21361282	Q08170	SRSF4	serine/arginine-rich splicing factor 4	152.355	4.49969	1.91055
77404397	Q7KZF4	SND1	staphylococcal nuclease domain-containing protein 1	152.414	4.11236	1.72884
28460688	P40222	TXLNA	alpha-taxilin	152.424	7.8706	1.7367
24432106	Q8N163	CCAR2	DBIRD complex subunit KIAA1967	152.535	4.5648	2.48447
222136639	P11586	C1TC	C-1-tetrahydrofolate synthase, cytoplasmic	153.298	5.62475	1.96455
39725634	Q6PKG0	LARP1	la-related protein 1	153.354	7.82097	2.20839
5453555	P62826	RAN	GTP-binding nuclear protein Ran	153.455	4.33937	2.14578
21361478	Q14141	SEPTIN6	septin-6	153.711	4.66252	2.73922
55956788	P19338	NUCL	nucleolin	154.622	4.3548	1.63875
71143137	O15347	HMGB3	high mobility group protein B3	154.971	5.03052	3.12952
4506649	P39023	RL3	60S ribosomal protein L3	155.064	5.60447	1.28106
25777600	Q99460	PSMD1	26S proteasome non-ATPase regulatory subunit 1	155.629	5.84159	3.35512
108773784	P61221	ABCE1	ATP-binding cassette sub-family E member 1	155.786	7.1343	2.19695
5031777	P50213	IDH3A	isocitrate dehydrogenase [NAD] subunit alpha, mitochondrial	155.871	5.43381	3.03268
156564401	P46459	NSF	vesicle-fusing ATPase	156.439	5.65298	2.01845
162287326	P07948	LYN	tyrosine-protein kinase Lyn	156.607	5.98667
4758504	Q99714	HCD2	3-hydroxyacyl-CoA dehydrogenase type-2	156.819	6.65692	2.91338
4506725	P62701	RS4X	40S ribosomal protein S4, X isoform	156.934	4.38258	1.8763
24234688	P38646	GRP75	stress-70 protein, mitochondrial	157.162	5.52258	2.24264
5453597	P52907	CAZA1	F-actin-capping protein subunit alpha-1	157.511	5.3534	2.94973
4757880	O43684	BUB3	mitotic checkpoint protein BUB3	157.933	5.33449	2.47425
5902076	Q07955	SRSF1	serine/arginine-rich splicing factor 1	157.946	4.57469	1.51696
124494238	O00159	MYO1C	unconventional myosin-Ic	158.017	4.60825	1.22807
190341060	Q96FC7	PHIPL	phytanoyl-CoA hydroxylase-interacting protein-like	158.239	3.59979	0.752141
17298690	Q9UHX1	PUF60	poly(U)-binding-splicing factor PUF60	159.85	5.00921
157389005	P17655	CAN2	calpain-2 catalytic subunit	160.146	4.61591	2.67042
5174735	P68371	TBB4B	tubulin beta-4B chain	161.201	4.40884	1.34082
18426915	Q16643	DREB	drebrin	161.245	5.89477	2.44263
66392203	P22392	NDKB	NME1-NME2 protein	161.363	4.98434	2.54653
4506243	P26599	PTBP1	polypyrimidine tract-binding protein 1	161.37	5.5151	2.92043
20357552	Q14247	SRC8	src substrate cortactin	161.955	4.87881	1.22957
11056044	Q15181	IPYR	inorganic pyrophosphatase	162.498	5.27084	3.82477
4502205	P18085	ARF4	ADP-ribosylation factor 4	163.565	4.85953	2.95857
5803135	Q15286	RAB35	ras-related protein Rab-35	164.897	5.87869	3.28775
6715568	Q08209	PP2BA	serine/threonine-protein phosphatase 2B catalytic subunit alpha isoform	165.212	6.10356	2.70019
296317337	P45880	VDAC2	voltage-dependent anion-selective channel protein 2	165.223	5.98167	1.6926
20127454	P31939	PUR9	bifunctional purine biosynthesis protein PURH	165.526	4.61985	2.64311
21361633	Q9H9A6	LRC40	leucine-rich repeat-containing protein 40	165.797	6.48851	2.56154
291084742	P08559	ODPA	pyruvate dehydrogenase E1 component subunit alpha, somatic form, mitochondrial	165.969	2.72408	2.21327
54873624	Q9BY44	EIF2A	eukaryotic translation initiation factor 2A	166.32	6.40968	2.02692
24234747	Q12905	ILF2	interleukin enhancer-binding factor 2	167.196	4.83891	2.01072
315013542	P29373	RABP2	cellular retinoic acid-binding protein 2	167.383	6.43398	2.74776
21361565	P24539	AT5F1	ATP synthase subunit b, mitochondrial	168.095	6.54904	2.24768
8922712	Q9NVA2	SEPTIN11	septin-11	168.401	6.80322	3.28777
50301238	P00390	GSHR	glutathione reductase, mitochondrial	169.267	7.34931	1.83386
61743954	Q09666	AHNK	neuroblast differentiation-associated protein AHNAK	171.333	11.1289	4.10189
17105394	P62750	RL23A	60S ribosomal protein L23a	171.579	7.26093	2.03455
4501867	Q99798	ACON	aconitate hydratase, mitochondrial	171.791	4.01188	2.81758
208609990	Q8N1F7	NUP93	nuclear pore complex protein Nup93	174.979	8.87345	1.9858
4885281	P00367	DHE3	glutamate dehydrogenase 1, mitochondrial	175.158	5.39762	1.95173
153945728	P46821	MAP1B	microtubule-associated protein 1B	175.95	5.5629	2.20852
5292161	P55036	PSMD4	26S proteasome non-ATPase regulatory subunit 4	176.004	10.8471	1.45352
4503743	Q13045	FLII	protein flightless-1 homolog	176.237	7.27244
7427519	Q14566	MCM6	DNA replication licensing factor MCM6	176.563	5.19648	1.40943
312261227	Q9BX79	STRA6	stimulated by retinoic acid gene 6 protein homolog	176.918	5.081	2.62733
148536855	P53621	COPA	coatomer subunit alpha	178.408	4.29243	1.9134
19920317	Q07065	CKAP4	cytoskeleton-associated protein 4	178.651	7.60161	1.6113
13540606	Q9H078	CLPB	caseinolytic peptidase B protein homolog	179.152	8.13203
40806190	A5PLL7	PDES1	TMEM189-UBE2V1 fusion protein	179.319	9.24435	1.74785
40806190	Q13404	UB2V1	TMEM189-UBE2V2 fusion protein	179.319	9.24435	1.74785
51242945	O43815	STRN	striatin	179.469	8.69356	13980.1
68509926	O43143	DHX15	putative pre-mRNA-splicing factor ATP-dependent RNA helicase DHX15	179.58	6.35966	1.89419
325651836	O60264	SMCA5	SWI/SNF-related matrix-associated actin-dependent regulator of chromatin subfamily A member 5	179.779	5.64361	1.52944
4506613	P35268	RL22	60S ribosomal protein L22 proprotein	180.136	7.17949	1.87172
5031741	O60884	DNJA2	dnaJ homolog subfamily A member 2	181.359	8.46792	2.82262
122939155	Q13423	NNTM	NAD(P) transhydrogenase, mitochondrial	181.567	7.88826	4.89763
171846268	P43897	EFTS	elongation factor Ts, mitochondrial	181.806	6.39698	1.88769
6912242	Q9UKG1	DP13A	DCC-interacting protein 13-alpha	183.162	7.06202	2.46286
78214522	P63173	RL38	60S ribosomal protein L38	183.554	2.69202	1.02149
4506341	P28288	ABCD3	ATP-binding cassette sub-family D member 3	184.451	6.098	2.01892
291167762	Q7Z4S6	KI21A	kinesin-like protein KIF21A	185.135	5.49546	1.12228
378548190	P23396	RS3	40S ribosomal protein S3	185.258	3.7398	2.14699
118918407	Q8WXH0	SYNE2	nesprin-2	186.58	8.17336	2.08025
29171702	Q9H2U2	IPYR2	inorganic pyrophosphatase 2, mitochondrial	187.026	4.96121	3.62265
45439306	P14868	SYDC	aspartate--tRNA ligase, cytoplasmic	187.663	4.82956	1.95186
17402900	Q96AE4	FUBP1	far upstream element-binding protein 1	188.376	5.75159	2.05672
23110925	P28072	PSB6	proteasome subunit beta type-6 proprotein	188.633	7.206	2.80276
381342476	P31943	HNRH1	heterogeneous nuclear ribonucleoprotein H	189.328	3.75862	2.16074
215982791	Q9Y4I1	MYO5A	unconventional myosin-Va	189.916	11.1595	1.66421
22027538	Q8WUM4	PDC6I	programmed cell death 6-interacting protein	190.145	6.37918	10.6272
24497435	P62195	PRS8	26S protease regulatory subunit 8	190.704	5.74097	2.14569
5031593	O15511	ARPC5	actin-related protein 2/3 complex subunit 5	191.341	8.01264	2.32879
94721261	P09543	CN37	2',3'-cyclic-nucleotide 3'-phosphodiesterase	191.477	9.23234	1.97066
12025678	O43707	ACTN4	alpha-actinin-4	192.046	5.65661	4.58165
255918192	Q5H9R7	PP6R3	serine/threonine-protein phosphatase 6 regulatory subunit 3	193.219	4.71203	1.45648
304555583	P29692	EF1D	elongation factor 1-delta	194.987	4.52035	2.31144
208973246	P09417	DHPR	dihydropteridine reductase	195.55	6.26499	1
9845509	P63000	RAC1	ras-related C3 botulinum toxin substrate 1	195.628	7.67069	2.01232
4758648	P33176	KINH	kinesin-1 heavy chain	197.389	5.56209	1.87406
164420681	P53582	MAP11	methionine aminopeptidase 1	198.104	5.52039	0.000314138
18201905	P06744	G6PI	glucose-6-phosphate isomerase	198.372	4.44859
4502101	P04083	ANXA1	annexin A1	198.811	7.64293	1
161702986	P15311	EZRI	ezrin	199.132	4.13815	2.14408
156071462	P12236	ADT3	ADP/ATP translocase 3	200.267	5.60295	2.23142
34740329	P51991	ROA3	heterogeneous nuclear ribonucleoprotein A3	202.222	1.65791	1.65704
162329583	Q16630	CPSF6	cleavage and polyadenylation specificity factor subunit 6	202.59	6.06538	2.01124
24431935	Q9NQC3	RTN4	reticulon-4	204.244	5.42195	2.86743
149158692	P46379	BAG6	large proline-rich protein BAG6	205.238	6.80933	1803.17
4507115	Q16658	FSCN1	fascin	205.868	2.70878	2.02618
41327773	Q7L014	DDX46	probable ATP-dependent RNA helicase DDX46	209.381	7.32419	1.85692
78000183	P50914	RL14	60S ribosomal protein L14	209.535	1.92373	1.51597
145386531	P30046	DOPD	D-dopachrome decarboxylase	210.658	2.98568	1
4506407	P43487	RANG	ran-specific GTPase-activating protein	211.074	4.93207	0.964496
380714665	Q13618	CUL3	cullin-3	211.831	4.05909
29826335	P20042	IF2B	eukaryotic translation initiation factor 2 subunit 2	216.283	4.62651	2.43479
50345988	P36542	ATPG	ATP synthase subunit gamma, mitochondrial	216.399	5.74966	2.38809
5032179	Q13263	TIF1B	transcription intermediary factor 1-beta	217.046	5.95485	2.25763
212274477	O43813	LANC1	lanC-like protein 1	218.691	5.91965	2.38666
73623030	P50416	CPT1A	carnitine O-palmitoyltransferase 1, liver isoform	220.555	6.63043	2.22715
4502011	P00568	KAD1	adenylate kinase isoenzyme 1	220.971	3.18437	2.18467
5579478	Q02750	MP2K1	dual specificity mitogen-activated protein kinase kinase 1	221.286	5.04775	2.66708
38373690	Q9BT78	CSN4	COP9 signalosome complex subunit 4	221.391	5.11992	2.316
21361399	P30153	2AAA	serine/threonine-protein phosphatase 2A 65 kDa regulatory subunit A alpha isoform	226.202	4.69221	1.93363
23510448	P33992	MCM5	DNA replication licensing factor MCM5	226.273	4.55449	1.68482
4504425	P09429	HMGB1	high mobility group protein B1	226.748	5.06251	2.69676
6031192	Q00325	S25A3	phosphate carrier protein, mitochondrial	227.691	3.46229	2.02793
27436946	P02545	LMNA	lamin	227.705	5.96812	5.86823
40316915	Q9H4A4	AMPB	aminopeptidase B	228.894	3.30617	3.07584
237649019	Q9UJS0	S2513	calcium-binding mitochondrial carrier protein Aralar2	228.911	4.84763	2.13079
209969703	Q9P258	RCC2	protein RCC2	232.444	6.16733	2.06483
212276121	Q9ULC4	MCTS1	malignant T-cell-amplified sequence 1	232.5	4.97809	2.79884
21536286	P12277	KCRB	creatine kinase B-type	233.491	6.04812	2.67784
34147630	P49411	EFTU	elongation factor Tu, mitochondrial	237.065	5.28694	1.89782
312283701	P40925	MDHC	malate dehydrogenase, cytoplasmic	238.708	4.95984	0.917024
6005846	Q6IBS0	TWF2	twinfilin-2	240.237	4.88552	1.847
166795297	Q9Y6G9	DC1L1	cytoplasmic dynein 1 light intermediate chain 1	240.257	6.34563	2.53373
14591909	P46777	RL5	60S ribosomal protein L5	243.824	6.33356	3.11218
86792661	Q9NY33	DPP3	dipeptidyl peptidase 3	245.992	5.97473	1
51599151	P04632	CPNS1	calpain small subunit 1	247.419	8.84579	2.74858
4503015	O75131	CPNE3	copine-3	249.493	3.98941	1.85131
208973244	P63104	1433Z	14-3-3 protein zeta/delta	252.536	5.59768	2.37057
67944630	P32969	RL9	60S ribosomal protein L9	254.648	3.66467	1.3446
17158044	P62753	RS6	40S ribosomal protein S6	255.227	5.03234	2.61242
154355000	Q92945	FUBP2	far upstream element-binding protein 2	255.24	7.69688	2.2981
149999611	P37108	SRP14	signal recognition particle 14 kDa protein	255.35	2.32485	2.26012
4503515	O15372	EIF3H	eukaryotic translation initiation factor 3 subunit H	255.563	6.45994	2.07629
40068518	P52209	6PGD	6-phosphogluconate dehydrogenase, decarboxylating	258.298	4.22884	1.88505
291575128	P07195	LDHB	L-lactate dehydrogenase B chain	259.607	5.20964	2.33373
4502203	P61204	ARF3	ADP-ribosylation factor 3	260.478	4.6336	2.30704
18375623	Q13838	DX39B	spliceosome RNA helicase DDX39B	262.447	0.988042	2.10174
42741659	P08183	MDR1	multidrug resistance protein 1	264.121	8.26715	0.00151003
47419916	P23381	SYWC	tryptophan--tRNA ligase, cytoplasmic	265.326	4.53867	2.96542
4758528	O14964	HGS	hepatocyte growth factor-regulated tyrosine kinase substrate	268.055	6.82688	3.3084
32189394	P06576	ATPB	ATP synthase subunit beta, mitochondrial	269.281	10.5873	2.68796
4507793	P61088	UBE2N	ubiquitin-conjugating enzyme E2 N	270.237	3.52155	1.86845
4503117	P04080	CYTB	cystatin-B	275.705	5.93259	1.93763
156119605	Q9UKN8	TF3C4	general transcription factor 3C polypeptide 4	284.225	7.80903	2.21419
114155142	P12270	TPR	nucleoprotein TPR	284.917	6.7142	1.65158
148727331	P45974	UBP5	ubiquitin carboxyl-terminal hydrolase 5	285.899	4.56792	14.0055
5803225	P62258	1433E	14-3-3 protein epsilon	289.745	4.13509	1.18026
5174731	Q99598	TSNAX	translin-associated protein X	295.834	14.6395	2.32562
195976807	P09455	RET1	retinol-binding protein 1	296.293	5.77491	0.86084
10863945	P13010	XRCC5	X-ray repair cross-complementing protein 5	296.367	4.69836	2.07341
4758786	O75306	NDUS2	NADH dehydrogenase [ubiquinone] iron-sulfur protein 2, mitochondrial	297.263	4.27371	2.32191
190014578	Q9NTJ5	SAC1	phosphatidylinositide phosphatase SAC1	298.312	5.9067	2.22654
32528282	O00154	ACH	Cytosolic acyl coenzyme A thioester hydrolase	298.593	5.93758	2.07394
228008291	O60506	HNRPQ	heterogeneous nuclear ribonucleoprotein Q	299.116	5.02361	1.91265
38045913	P15531	NDKA	nucleoside diphosphate kinase A	300.803	6.6782	2.23826
5453599	P47755	CAZA2	F-actin-capping protein subunit alpha-2	301.844	6.60511	2.29333
38327039	P34932	HSP74	heat shock 70 kDa protein 4	304.045	6.90183	2.86759
5031973	Q15084	PDIA6	protein disulfide-isomerase A6	312.772	5.26447	2.08727
66933005	P27824	CALX	calnexin	313.28	7.39361	3.60492
21735621	P40926	MDHM	malate dehydrogenase, mitochondrial	316.836	4.56568	2.77393
6912238	P30044	PRDX5	peroxiredoxin-5, mitochondrial	318.023	7.7802	2.09086
88900491	Q14697	GANAB	neutral alpha-glucosidase AB	323.436	3.49562	1.72632
5453607	Q99832	TCPH	T-complex protein 1 subunit eta	330.805	4.95831	1.71668
23110944	P60900	PSA6	proteasome subunit alpha type-6	335.681	4.06217	1.19046
7661952	Q15020	SART3	squamous cell carcinoma antigen recognized by T-cells 3	336.639	3.84473	2.56984
289629265	Q15437	SC23B	protein transport protein Sec23B	337.791	4.32332	2.36944
4507709	Q13630	FCL	GDP-L-fucose synthase	343.409	5.69257	0.518122
5802966	P60981	DEST	destrin	345.635	4.62649	2.26018
315707010	O95394	AGM1	phosphoacetylglucosamine mutase	347.521	5.91105
52426745	P22681	CBL	E3 ubiquitin-protein ligase CBL	347.826	7.10016	1.99734
4758138	P17844	DDX5	probable ATP-dependent RNA helicase DDX5	349.27	4.2079	1.67948
308818200	Q14195	DPYL3	dihydropyrimidinase-related protein 3	352.582	4.43634	2.55894
164698498	Q9UHD8	SEPTIN9	septin-9	352.668	4.70572	2.59205
19913428	P21281	VATB2	V-type proton ATPase subunit B, brain isoform	354.729	5.86732	2.52983
226246671	P60866	RS20	40S ribosomal protein S20	355.837	5.58561
24430151	P62191	PRS4	26S protease regulatory subunit 4	358.46	5.58193	2.24864
212549553	Q12906	ILF3	interleukin enhancer-binding factor 3	361.01	5.53336	1.87896
4503481	P26641	EF1G	elongation factor 1-gamma	364.787	3.65611	1.65103
14251209	O00299	CLIC1	chloride intracellular channel protein 1	364.982	5.89115	3.31361
5032027	Q09028	RBBP4	histone-binding protein RBBP4	365.472	3.64383	1.95741
6996014	P12081	HARS1	histidine--tRNA ligase, cytoplasmic	367.2	4.5008	3.68523
223278379	Q5JTH9	RRP12	RRP12-like protein	367.721	2.95064	1.82431
62241042	P07814	SYEP	bifunctional glutamate/proline--tRNA ligase	368.585	4.64659	1.98124
32307161	Q13616	CUL1	cullin-1	374.47	7.36962	1.86756
23510340	P22314	UBA1	ubiquitin-like modifier-activating enzyme 1	374.729	5.51179	3.55119
425876768	P35237	SPB6	serpin B6	379.476	7.21615	2.12375
4826998	P23246	SFPQ	splicing factor, proline- and glutamine-rich	381.04	2.74709	1.53107
4506681	P62280	RS11	40S ribosomal protein S11	399.782	3.13057	1.61877
4503523	O15371	EIF3D	eukaryotic translation initiation factor 3 subunit D	401.645	4.26007	1.68488
119220557	P22234	PUR6	multifunctional protein ADE2	402.137	4.24038
14670350	P78347	GTF2I	general transcription factor II-I	404.24	5.17881	2.07183
7661920	P38919	IF4A3	eukaryotic initiation factor 4A-III	406.163	5.55043	1.74117
4557237	P24752	THIL	acetyl-CoA acetyltransferase, mitochondrial	407.219	8.32598	1.41166
4506695	P39019	RS19	40S ribosomal protein S19	408.426	4.74115	2.33072
224465190	Q12765	SCRN1	secernin-1	409.627	3.9503	3.08894
25777612	O43242	PSMD3	26S proteasome non-ATPase regulatory subunit 3	410.105	6.7359	2.46525
253970456	O43719	HTSF1	HIV Tat-specific factor 1	413.565	6.41495	3.68184
156416003	P31040	SDHA	succinate dehydrogenase [ubiquinone] flavoprotein subunit, mitochondrial	429.081	4.09446	2.72119
4507241	Q08945	SSRP1	FACT complex subunit SSRP1	429.146	10.8463	1.72952
4507879	P21796	VDAC1	voltage-dependent anion-selective channel protein 1	429.662	7.35487	0.404077
284448551	P00387	NB5R3	NADH-cytochrome b5 reductase 3	430.273	4.63405	1.90288
19923142	Q14974	IMB1	importin subunit beta-1	433.786	4.85157	2.89397
117190254	P07910	HNRPC	heterogeneous nuclear ribonucleoproteins C1/C2	434.056	5.13657
23238211	O15144	ARPC2	actin-related protein 2/3 complex subunit 2	441.225	4.74925	3.51333
157649073	Q01518	CAP1	adenylyl cyclase-associated protein 1	441.736	7.02783	6.44229
7661666	Q9UGI8	TES	testin	446.946	4.46142	2.69989
48762920	P17858	PFKAL	6-phosphofructokinase, liver type	446.953	4.8881	1.50922
156713442	P25789	PSA4	proteasome subunit alpha type-4	447.25	7.55174	1.91893
62422571	Q14194	DPYL1	dihydropyrimidinase-related protein 1	461.074	4.61382	2.14117
4506583	P27694	RFA1	replication protein A 70 kDa DNA-binding subunit	469.974	5.44655	2.13351
6912586	O95336	6PGL	6-phosphogluconolactonase	475.55	6.31968	2.23369
4506597	P30050	RL12	60S ribosomal protein L12	476.298	5.04468	1.91364
124494254	Q9UQ80	PA2G4	proliferation-associated protein 2G4	482.673	4.71997	2.25559
41350320	Q9UNF1	MAGD2	melanoma-associated antigen D2	485.055	7.16744	1.77455
359279861	Q9BPU6	DPYL5	dihydropyrimidinase-related protein 5	489.464	5.11147	2.339
167466173	P0DMV9	HS71B	heat shock 70 kDa protein 1A/1B	489.533	5.68772	2.30386
167466173	P0DMV8	HS71A	heat shock 70 kDa protein 1A/1B	489.533	5.68772	2.30386
4503513	Q13347	EIF3I	eukaryotic translation initiation factor 3 subunit I	498.566	5.4404	2.6109
5730023	Q9Y230	RUVB2	ruvB-like 2	502.733	5.71428	2.77357
4504067	P17174	AATC	aspartate aminotransferase, cytoplasmic	505.221	7.37964	1
222144326	O14950	ML12B	myosin regulatory light chain 12B	512.618	6.22542	1.47444
5453549	Q13162	PRDX4	peroxiredoxin-4	514.253	6.06947	3.6377
5031977	P43490	NAMPT	nicotinamide phosphoribosyltransferase	522.925	7.0676	2.59816
380692342	P26196	DDX6	probable ATP-dependent RNA helicase DDX6	531.6	4.47633	2.1097
91199540	P09622	DLDH	dihydrolipoyl dehydrogenase, mitochondrial	537.69	4.10299	2.07784
289577116	P78344	IF4G2	eukaryotic translation initiation factor 4 gamma 2	544.169	5.20866	1.89864
350276247	P36873	PP1G	serine/threonine-protein phosphatase PP1-gamma catalytic subunit	553.687	3.30272	1.63998
109134349	Q9UBF2	COPG2	coatomer subunit gamma-2	560.996	5.49331	2.74555
50345984	P25705	ATPA	ATP synthase subunit alpha, mitochondrial	561.129	6.87137	2.2607
4502171	P07741	APT	adenine phosphoribosyltransferase	566.051	8.99672	5.43093
190885499	P20674	COX5A	cytochrome c oxidase subunit 5A, mitochondrial	566.52	5.22433	0.00059155
197116386	Q9H857	NT5D2	5'-nucleotidase domain-containing protein 2	567.073	4.26645	1.75771
20357529	P62879	GBB2	guanine nucleotide-binding protein G(I)/G(S)/G(T) subunit beta-2	568.251	2.081	2.24811
42544159	Q92598	HS105	heat shock protein 105 kDa	570.581	5.61124	2.09162
7524354	O95865	DDAH2	N(G),N(G)-dimethylarginine dimethylaminohydrolase 2	574.606	6.05544	3.4047
4506787	P46940	IQGA1	ras GTPase-activating-like protein IQGAP1	579.527	5.18818	2.55479
4506209	P35998	PRS7	26S protease regulatory subunit 7	585.383	6.46954	2.50698
4502643	P40227	TCPZ	T-complex protein 1 subunit zeta	587.018	5.09176	1.99489
7657381	Q9UMS4	PRP19	pre-mRNA-processing factor 19	587.961	4.15009	1.83183
167614485	P42765	THIM	3-ketoacyl-CoA thiolase, mitochondrial	597.742	6.94456	2.15136
28178832	P48735	IDHP	isocitrate dehydrogenase [NADP], mitochondrial	607.318	4.97686	1.77626
17986258	P60660	MYL6	myosin light polypeptide 6	628.039	3.78528	1.45539
21361370	P11216	PYGB	glycogen phosphorylase, brain form	637.625	4.75961	1.8013
21956645	P58546	MTPN	myotrophin	638.964	4.94673	3.14099
4503521	P60228	EIF3E	eukaryotic translation initiation factor 3 subunit E	640.881	4.98017	2.52358
94721241	P41252	SYIC	isoleucine--tRNA ligase, cytoplasmic	647.439	4.51199	1.84386
297374782	P52565	GDIR1	rho GDP-dissociation inhibitor 1	649.787	7.15225	14.5291
5453958	P53041	PPP5	serine/threonine-protein phosphatase 5	678.961	8.4223	2.18805
4758304	P13667	PDIA4	protein disulfide-isomerase A4	704.976	8.42672	3.93605
150418007	P49792	RBP2	E3 SUMO-protein ligase RanBP2	715.567	6.40609	2.48471
17149828	Q9BXJ9	NAA15	N-alpha-acetyltransferase 15, NatA auxiliary subunit	715.62	4.7584	3.26053
20544151	Q13185	CBX3	chromobox protein homolog 3	729.796	6.12811	1.93268
199562283	A6NKG5	RTL1	retrotransposon-like protein 1	763.226	4.55534	1.94603
4758256	P05198	IF2A	eukaryotic translation initiation factor 2 subunit 1	781.813	5.21235	2.20685
4504035	P49915	GUAA	GMP synthase [glutamine-hydrolyzing]	805.344	4.69731	2.87582
5901922	Q16543	CDC37	hsp90 co-chaperone Cdc37	830.843	5.38064	2.12957
109148508	Q96FW1	OTUB1	ubiquitin thioesterase OTUB1	846.806	5.00303	1.95593
108773793	P11413	G6PD	glucose-6-phosphate 1-dehydrogenase	870.937	3.73924	2.77504
201861813	Q96AC1	FERM2	fermitin family homolog 2	887.246	4.62905	2.11354
194306559	Q07866	KLC1	kinesin light chain 1	911.697	4.28511	1.71684
29826282	O15355	PPM1G	protein phosphatase 1G	922.692	5.8137	2.10421
47933379	P54920	SNAA	alpha-soluble NSF attachment protein	952.231	7.99632	3.19406
31657129	O15067	PUR4	phosphoribosylformylglycinamidine synthase	976.467	5.05358	4.12471
33356547	P49736	MCM2	DNA replication licensing factor MCM2	991.551	4.72438	2.00529
19923315	P34897	GLYM	serine hydroxymethyltransferase, mitochondrial	1009.27	5.56731	2.32699
23110942	P28066	PSA5	proteasome subunit alpha type-5	1015.29	7.47391	1.71512
148539872	Q9BWD1	THIC	acetyl-CoA acetyltransferase, cytosolic	1034.02	2.8834	2.48347
4826686	Q92499	DDX1	ATP-dependent RNA helicase DDX1	1046.42	4.62894	1.75272
45545411	Q9Y2A7	NCKP1	nck-associated protein 1	1054.56	4.28103	1.86425
4504327	P55084	ECHB	trifunctional enzyme subunit beta, mitochondrial	1061.31	6.7472	2.20352
38327625	O75390	CISY	citrate synthase, mitochondrial	1086.05	5.44489	3.31005
7662276	Q9Y4C2	TCAF1	protein FAM115A	1134.34	5.73931	1.82674
68160922	P62263	RS14	40S ribosomal protein S14	1191.83	3.64843	1.82446
7705433	Q9Y262	EIF3L	eukaryotic translation initiation factor 3 subunit L	1317.53	3.95057	2.0894
157694494	Q9BQG0	MBB1A	myb-binding protein 1A	1468.43	4.97361	1.79952
71565154	P11766	ADHX	alcohol dehydrogenase class-3	1477.44	5.47044	1.52987
7657015	Q9Y3I0	RTCB	tRNA-splicing ligase RtcB homolog	1512.12	5.25681	2.01844
394953908	O00231	PSD11	26S proteasome non-ATPase regulatory subunit 11	1962.18	6.06025	3.43824
52632383	P14866	HNRPL	heterogeneous nuclear ribonucleoprotein L	2551.52	4.70695	2.04064
4506221	O00232	PSD12	26S proteasome non-ATPase regulatory subunit 12	3127.46	4.2403	3.21807
100913206	Q08211	DHX9	ATP-dependent RNA helicase A	3633.8	3.74361	1.96425
21361741	Q9NP79	VTA1	vacuolar protein sorting-associated protein VTA1 homolog	7890.81	7.04286	1.85345
4503509	Q14152	EIF3A	eukaryotic translation initiation factor 3 subunit A	11800.4	5.69989	2.18011
14210538	Q9BXI3	5NT1A	cytosolic 5'-nucleotidase 1A	∞	4.49868	1
124256480	Q676U5	A16L1	autophagy-related protein 16-1	∞	9.18866
5032093	Q15758	AAAT	neutral amino acid transporter B(0)	∞	7.44585	1
31982927	Q86V21	AACS	acetoacetyl-CoA synthetase	∞	17.2734
34147384	Q9H7C9	AAMDC	mth938 domain-containing protein	∞	∞
171184400	Q9NRK6	ABCBA	ATP-binding cassette sub-family B member 10, mitochondrial	∞	∞
189027141	Q9BV23	ABHD6	monoacylglycerol lipase ABHD6	∞	∞
61743942	Q8IZP0	ABI1	abl interactor 1	∞	∞	1.34719
62362412	P00519	ABL1	tyrosine-protein kinase ABL1	∞	∞
51173711	O14639	ABLM1	actin-binding LIM protein 1	∞	∞
4557233	P16219	ACADS	short-chain specific acyl-CoA dehydrogenase, mitochondrial	∞	∞
187608516	Q15057	ACAP2	arf-GAP with coiled-coil, ANK repeat and PH domain-containing protein 2	∞	∞	1
19923122	P32297	ACHA3	neuronal acetylcholine receptor subunit alpha-3	∞	∞
507834063	P21399	ACOHC	cytoplasmic aconitate hydratase	∞	10.3387
34577075	O14734	ACOT8	acyl-coenzyme A thioesterase 8	∞	9.01052
156104864	O15254	ACOX3	peroxisomal acyl-coenzyme A oxidase 3	∞	∞	1
4826852	O14561	ACPM	acyl carrier protein, mitochondrial	∞	3.90151	1
156151445	Q96CM8	ACSF2	acyl-CoA synthetase family member 2, mitochondrial	∞	4.4098	1.12029
4501885	P60709	ACTB	actin, cytoplasmic 1	∞	1.52418
47078295	P00813	ADA	adenosine deaminase	∞	7.55294
61175224	Q6DHV7	ADAL	adenosine deaminase-like protein	∞	3.42128
85362737	Q9GZN8	ADSSP	UPF0687 protein C20orf27	∞	18.829	1
4504009	P06280	AGAL	alpha-galactosidase A	∞	∞
6912464	O95490	AGRL2	latrophilin-2	∞	9.97924	1
156766050	Q8IVF2	AHNK2	protein AHNAK2	∞	6.09214	1
215490009	Q12904	AIMP1	aminoacyl tRNA synthase complex-interacting multifunctional protein 1	∞	5.07087
11125770	Q13155	AIMP2	aminoacyl tRNA synthase complex-interacting multifunctional protein 2	∞	5.29736	1.38185
41152097	Q02040	AK17A	A-kinase anchor protein 17A	∞	15.1155	1.41614
21493022	Q02952	AKA12	A-kinase anchor protein 12	∞	∞
148596953	Q9P2G1	AKIB1	ankyrin repeat and IBR domain-containing protein 1	∞	∞	1
62241015	P31749	AKT1	RAC-alpha serine/threonine-protein kinase	∞	5.52717	0.918872
498917186	Q96B36	AKTS1	proline-rich AKT1 substrate 1	∞	∞
25777736	P30038	AL4A1	delta-1-pyrroline-5-carboxylate dehydrogenase, mitochondrial	∞	∞
319655561	P49419	AL7A1	alpha-aminoadipic semialdehyde dehydrogenase	∞	10.3387
153791910	Q9NP73	ALG13	UDP-N-acetylglucosamine transferase subunit ALG13 homolog	∞	∞
5031953	Q92685	ALG3	dol-P-Man:Man(5)GlcNAc(2)-PP-Dol alpha-1,3-mannosyltransferase	∞	5.96752	1.31541
164663798	Q8IY45	AMN1	protein AMN1 homolog	∞	3.98487
116268103	Q96K21	ANCHR	zinc finger FYVE domain-containing protein 19	∞	5.51329
28461129	Q8IV38	ANKY2	ankyrin repeat and MYND domain-containing protein 2	∞	12.4353
31657094	Q9NQW6	ANLN	actin-binding protein anillin	∞	∞
227908867	Q96LA8	ANM6	protein arginine N-methyltransferase 6	∞	10.7498	1
40538772	Q6P2P2	ANM9	putative protein arginine N-methyltransferase 10	∞	∞
55741655	Q9HCE9	ANO8	anoctamin-8	∞	∞
58331113	Q6P6B7	ANR16	ankyrin repeat domain-containing protein 16	∞	13.0116
16418357	Q6AI12	ANR40	ankyrin repeat domain-containing protein 40	∞	7.73721
4826643	P12429	ANXA3	annexin A3	∞	∞
4502105	P09525	ANXA4	annexin A4	∞	4.0277	1
4502107	P08758	ANXA5	annexin A5	∞	2.83162	0.0014357
38202207	P27338	AOFB	amine oxidase [flavin-containing] B	∞	14.5681
338753419	O60641	AP180	clathrin coat assembly protein AP180	∞	∞
260436860	Q10567	AP1B1	AP-1 complex subunit beta-1	∞	4.05248
118582289	Q92481	AP2B	transcription factor AP-2-beta	∞	7.17181	1.13658
70906430	P53680	AP2S1	AP-2 complex subunit sigmaP17	∞	1.62551	1.00693
511772996	Q13367	AP3B2	AP-3 complex subunit beta-2	∞	5.93767
346986334	P50583	AP4A	bis(5'-nucleosyl)-tetraphosphatase [asymmetrical]	∞	7.04948
361050338	Q9Y587	AP4S1	AP-4 complex subunit sigma-1	∞	∞	1
82546847	O43299	AP5Z1	AP-5 complex subunit zeta-1	∞	∞
12056971	Q9H1A4	APC1	anaphase-promoting complex subunit 1	∞	53.0506	1.4841
511094008	P60006	APC15	anaphase-promoting complex subunit 15	∞	∞	1
305410829	Q7Z2E3	APTX	aprataxin	∞	∞	1
507834119	Q66PJ3	AR6P4	ADP-ribosylation factor-like protein 6-interacting protein 4	∞	3.9873	1
22749091	Q8N6S5	AR6P6	ADP-ribosylation factor-like protein 6-interacting protein 6	∞	1.92718
28416436	Q8N6T3	ARFG1	ADP-ribosylation factor GTPase-activating protein 1	∞	7.93074
50843837	Q8TER5	ARH40	rho guanine nucleotide exchange factor 40	∞	6.94824	1.15212
166064034	Q14155	ARHG7	rho guanine nucleotide exchange factor 7	∞	6.0257
62548864	O15013	ARHGA	rho guanine nucleotide exchange factor 10	∞	∞
297207099	Q8NFD5	ARI1B	AT-rich interactive domain-containing protein 1B	∞	56.9472	0.459215
56549668	Q68CP9	ARID2	AT-rich interactive domain-containing protein 2	∞	3.71534	1
56549656	Q96B23	ARK2N	uncharacterized protein C18orf25	∞	∞
68303542	P04424	ARLY	argininosuccinate lyase	∞	18.6134
31377663	Q8N2F6	ARM10	armadillo repeat-containing protein 10	∞	∞
8922479	Q9NVT9	ARMC1	armadillo repeat-containing protein 1	∞	3.52016
312836798	Q6NXE6	ARMC6	armadillo repeat-containing protein 6	∞	∞	1
154350213	Q5T2E6	ARMD3	UPF0668 protein C10orf76	∞	7.10261	1
9966913	Q9P1U1	ARP3B	actin-related protein 3B	∞	6.55248
10880136	P49407	ARRB1	beta-arrestin-1	∞	6.02439
382545144	P32121	ARRB2	beta-arrestin-2	∞	∞	1.09752
19923540	Q8TDY4	ASAP3	arf-GAP with SH3 domain, ANK repeat and PH domain-containing protein 3	∞	∞
7661592	Q9Y294	ASF1A	histone chaperone ASF1A	∞	∞	0.000484784
145275202	Q7L266	ASGL1	isoaspartyl peptidase/L-asparaginase	∞	∞
117553627	O95671	ASML	N-acetylserotonin O-methyltransferase-like protein	∞	19.9038
149944526	Q9C0F0	ASXL3	putative Polycomb group protein ASXL3	∞	3.83182
4502277	P05026	AT1B1	sodium/potassium-transporting ATPase subunit beta-1	∞	9.47798	1
48255945	P20020	AT2B1	plasma membrane calcium-transporting ATPase 1b	∞	22.0727	1
17978471	Q9Y2Q0	AT8A1	probable phospholipid-transporting ATPase IA	∞	19.7193
44888835	O60423	AT8B3	probable phospholipid-transporting ATPase IK	∞	7.5035
186910323	Q5SQI0	ATAT	alpha-tubulin N-acetyltransferase	∞	4.29883
29336043	Q86WG3	ATCAY	caytaxin	∞	5.39108
45827806	Q6DD88	ATLA3	atlastin-3	∞	5.04173	0.00160157
4757804	O00244	ATOX1	copper transport protein ATOX1	∞	5.74905	1
51479156	O75964	ATP5L	ATP synthase subunit g, mitochondrial	∞	∞
251831112	P00846	ATP6	ATP synthase F0 subunit 6	∞	∞
21735485	Q8N5M1	ATPF2	ATP synthase mitochondrial F1 complex assembly factor 2	∞	∞
171543895	Q99700	ATX2	ataxin-2	∞	∞	1.35823
379030615	O75061	AUXI	putative tyrosine-protein phosphatase auxilin	∞	6.08066
314122220	P04920	B3A2	anion exchange protein 2	∞	∞
154689817	Q6Y288	B3GLT	beta-1,3-glucosyltransferase	∞	∞
288915525	Q99933	BAG1	BAG family molecular chaperone regulator 1AG-1L	∞	13.4665	1
213511508	P51572	BAP31	B-cell receptor-associated protein 31	∞	10.444
4757838	Q07812	BAX	apoptosis regulator BAXeta	∞	4.12469	1.32897
14670392	Q9UIG0	BAZ1B	tyrosine-protein kinase BAZ1B	∞	∞
217035121	Q8WY36	BBX	HMG box transcription factor BBX	∞	∞	1.27811
282398112	P56945	BCAR1	breast cancer anti-estrogen resistance protein 1	∞	∞
4502379	O95999	BCL10	B-cell lymphoma/leukemia 10	∞	5.60238
7661958	Q9NYF8	BCLF1	bcl-2-associated transcription factor 1	∞	8.15223	1
148746181	P55061	BI1	bax inhibitor 1	∞	∞
51479166	Q8TD16	BICD2	protein bicaudal D homolog 2	∞	4.28084
37574726	P55957	BID	BH3-interacting domain death agonist	∞	4.21219	1
154350241	Q5TH69	BIG3	brefeldin A-inhibited guanine nucleotide-exchange protein 3	∞	9.63798
21536400	O00499	BIN1	myc box-dependent-interacting protein 1	∞	17.8018	1
315113895	P78537	BL1S1	biogenesis of lysosome-related organelles complex 1 subunit 1	∞	9.7394
46852398	Q6QNY1	BL1S2	biogenesis of lysosome-related organelles complex 1 subunit 2	∞	∞
17157999	Q969J3	BORC5	loss of heterozygosity 12 chromosomal region 1 protein	∞	∞
13786127	Q9H3Q1	BORG4	cdc42 effector protein 4	∞	10.5578	1
221316588	Q86WA6	BPHL	valacyclovir hydrolase	∞	4.02301	1.16472
304555614	Q6PJG6	BRAT1	BRCA1-associated ATM activator 1	∞	4.93397	0.000858584
13236583	P46736	BRCC3	lys-63-specific deubiquitinase BRCC36	∞	3.11684
34452707	Q9H0E9	BRD8	bromodomain-containing protein 8	∞	∞	1
19923665	Q8WY22	BRI3B	BRI3-binding protein	∞	∞
27544939	Q8WUW1	BRK1	protein BRICK1	∞	15.3526	1.4849
375298747	Q8IWQ3	BRSK2	serine/threonine-protein kinase BRSK2	∞	20.4825
20127580	Q9BX70	BTBD2	BTB/POZ domain-containing protein 2	∞	∞
83641885	P20290	BTF3	transcription factor BTF3	∞	1.87908	1
32171175	P41223	BUD31	protein BUD31 homolog	∞	11.8409	1.48365
226495417	Q96A19	C102A	coiled-coil domain-containing protein 102A	∞	∞
4502491	Q07021	C1QBP	complement component 1 Q subcomponent-binding protein, mitochondrial	∞	6.36398	1.42716
187155251	Q9BV19	CA050	uncharacterized protein C1orf50	∞	∞
54112390	P54289	CA2D1	voltage-dependent calcium channel subunit alpha-2/delta-1	∞	∞
195927022	Q9Y376	CAB39	calcium-binding protein 39	∞	∞
313151181	Q9Y6J0	CABIN	calcineurin-binding protein cabin-1	∞	∞
14589889	P19022	CADH2	cadherin-2 preproprotein	∞	32.1069	1
44680105	Q05682	CALD1	caldesmon	∞	9.59414	0.000695073
44955929	Q08AD1	CAMP2	calmodulin-regulated spectrin-associated protein 2	∞	∞	1.47
122937255	Q9P1Y5	CAMP3	calmodulin-regulated spectrin-associated protein 3	∞	∞	1
241982712	O75155	CAND2	cullin-associated NEDD8-dissociated protein 2	∞	∞	0.418333
229577444	Q8WVQ1	CANT1	soluble calcium-activated nucleotidase 1	∞	5.3638
5453593	P40123	CAP2	adenylyl cyclase-associated protein 2	∞	∞
92087058	Q96LW7	CAR19	bcl10-interacting CARD protein	∞	∞
15718698	P55210	CASP7	caspase-7elta	∞	∞	1
22538437	P07858	CATB	cathepsin B preproprotein	∞	6.81467	1
118766350	Q9H9S4	CB39L	calcium-binding protein 39-like	∞	3.77761
187960037	P83916	CBX1	chromobox protein homolog 1	∞	5.56939	1
10190682	Q9HC52	CBX8	chromobox protein homolog 8	∞	∞
108936950	Q86WR0	CCD25	coiled-coil domain-containing protein 25	∞	15.6551
4826665	O14618	CCS	copper chaperone for superoxide dismutase	∞	6.00214
68163411	Q13740	CD166	CD166 antigen	∞	5.21954
343887347	O95400	CD2B2	CD2 antigen cytoplasmic tail-binding protein 2	∞	8.50574	1.31305
295821205	O75419	CDC45	cell division control protein 45 homolog	∞	∞	1
154759283	Q86X02	CDR2L	cerebellar degeneration-related protein 2-like	∞	∞
20143480	O95674	CDS2	phosphatidate cytidylyltransferase 2	∞	4.72066	1
71164871	Q92879	CELF1	CUGBP Elav-like family member 1	∞	6.72905
13123778	Q9BZC1	CELF4	CUGBP Elav-like family member 4	∞	∞
21735415	P07199	CENPB	major centromere autoantigen B	∞	∞
56118234	Q7Z7K6	CENPV	centromere protein V	∞	∞
401871066	A8MT69	CENPX	centromere protein X	∞	∞
5901954	O95684	CEP43	FGFR1 oncogene partner	∞	∞
32455256	Q96G23	CERS2	ceramide synthase 2	∞	4.28745	1
371122599	Q6ZMG9	CERS6	ceramide synthase 6	∞	3.28662
194294543	Q9Y5P4	CERT	collagen type IV alpha-3-binding protein	∞	6.7037	1
145279222	Q8TBY9	CF251	WD repeat-containing protein 66	∞	2.93162	1
95147342	Q3L8U1	CHD9	chromodomain-helicase-DNA-binding protein 9	∞	∞
103485496	Q9HD42	CHM1A	charged multivesicular body protein 1a	∞	∞
31542306	Q7LBR1	CHM1B	charged multivesicular body protein 1b	∞	4.69479
7706353	Q9Y3E7	CHMP3	charged multivesicular body protein 3	∞	5.31795
27545323	Q8IZ52	CHSS2	chondroitin sulfate synthase 2	∞	∞
365906244	Q96LT7	CI072	protein C9orf72	∞	∞
14149934	Q9H5X1	CIA2A	MIP18 family protein FAM96A	∞	3.98122
49574510	Q9Y375	CIA30	complex I intermediate-associated protein 30, mitochondrial	∞	∞
8923930	Q9NZ45	CISD1	CDGSH iron-sulfur domain-containing protein 1	∞	∞
208431771	Q9H3H3	CK068	UPF0696 protein C11orf68	∞	8.07611
6005995	P09497	CLCB	clathrin light chain B	∞	12.1349
14149607	P51798	CLCN7	H(+)/Cl(-) exchange transporter 7	∞	∞
351542242	P30622	CLIP1	CAP-Gly domain-containing linker protein 1	∞	∞
31982881	Q8N3C7	CLIP4	CAP-Gly domain-containing linker protein 4	∞	∞
5174419	Q16740	CLPP	putative ATP-dependent Clp protease proteolytic subunit, mitochondrial	∞	6.10669
4502897	O96005	CLPT1	cleft lip and palate transmembrane protein 1	∞	∞	1
20270371	Q96DG6	CMBL	carboxymethylenebutenolidase homolog	∞	7.7489	1.45229
4502805	P10645	CMGA	chromogranin-A preproprotein	∞	∞	1
116812586	Q86XI2	CNDG2	condensin-2 complex subunit G2	∞	6.65475	0.959271
271398239	Q96KP4	CNDP2	cytosolic non-specific dipeptidase	∞	5.62041	1.2683
4758018	Q99439	CNN2	calponin-2	∞	3.81843
40068049	Q8NE01	CNNM3	metal transporter CNNM3	∞	∞	0.000411831
94681046	Q6P4Q7	CNNM4	metal transporter CNNM4	∞	∞
24308071	Q96F85	CNRP1	CB1 cannabinoid receptor-interacting protein 1RIP1a	∞	4.81497	1.37134
110349772	P02452	CO1A1	collagen alpha-1(I) chain preproprotein	∞	∞	1
115527062	P12110	CO6A2	collagen alpha-2(VI) chainC2	∞	∞
45580688	P10643	CO7	complement component C7	∞	6.06865
282396088	Q96BR5	COA7	sel1 repeat-containing protein 1	∞	12.4522	1
31415878	Q9UH73	COE1	transcription factor COE1	∞	5.39246
325197106	Q96JB2	COG3	conserved oligomeric Golgi complex subunit 3	∞	∞	1
33457344	Q9Y2V7	COG6	conserved oligomeric Golgi complex subunit 6	∞	∞	1
186928841	Q96MW5	COG8	conserved oligomeric Golgi complex subunit 8	∞	∞
21361661	Q9H0A8	COMD4	COMM domain-containing protein 4	∞	4.76887	1.13755
45333909	Q7Z4G1	COMD6	COMM domain-containing protein 6	∞	7.34429
205830453	P21964	COMT	catechol O-methyltransferase	∞	7.2075	1
65787364	Q9BR76	COR1B	coronin-1B	∞	3.2565	1.38498
21624607	Q14019	COTL1	coactosin-like protein	∞	6.22477
251831109	P00395	COX1	cytochrome c oxidase subunit I	∞	∞
4502981	P13073	COX41	cytochrome c oxidase subunit 4, mitochondrial	∞	9.68218
4503219	P33261	CP2CJ	cytochrome P450 2C19	∞	3.25405
18491008	P51589	CP2J2	cytochrome P450 2J2	∞	1.90662
34098959	Q7Z449	CP2U1	cytochrome P450 2U1	∞	5.24318
89274169	Q6FI81	CPIN1	anamorsin	∞	3.82323	0.822556
5729781	O14810	CPLX1	complexin-1	∞	∞
153251270	Q9BRF8	CPPED	calcineurin-like phosphoesterase domain-containing protein 1	∞	5.7321	0.000732866
39545580	Q96SW2	CRBN	protein cereblon	∞	9.26416
19745184	P16220	CREB1	cyclic AMP-responsive element-binding protein 1	∞	4.13395
41327712	P46108	CRK	adapter molecule crk	∞	25.6624	1
5453601	O75718	CRTAP	cartilage-associated protein	∞	4.11678
32171215	Q53ET0	CRTC2	CREB-regulated transcription coactivator 2	∞	∞
255760066	Q9UBW8	CSN7A	COP9 signalosome complex subunit 7a	∞	7.51417
4557493	P33240	CSTF2	cleavage stimulation factor subunit 2	∞	4.7762	1
14149675	Q9H0L4	CSTFT	cleavage stimulation factor subunit 2 tau variant	∞	∞
24308179	Q9P2B4	CT2NL	CTTNBP2 N-terminal-like protein	∞	2.43532	1.40781
67188445	Q9Y5B0	CTDP1	RNA polymerase II subunit A C-terminal domain phosphatase	∞	17.6658	1
19923989	Q96CG8	CTHR1	collagen triple helix repeat-containing protein 1	∞	5.12656
55770846	P26232	CTNA2	catenin alpha-2	∞	7.36097	1
62198241	O60888	CUTA	protein CutA	∞	∞	1
262118227	P14406	CX7A2	cytochrome c oxidase subunit 7A2, mitochondrial	∞	∞
63054832	P49447	CY561	cytochrome b561	∞	4.76802	1
41281768	P00167	CYB5	cytochrome b5	∞	∞
11128019	P99999	CYC	cytochrome c	∞	3.43338	0.00184191
19549331	Q8WWM9	CYGB	cytoglobin	∞	7.75485
8670546	Q99418	CYH2	cytohesin-2	∞	∞
513788261	Q69YQ0	CYTSA	cytospin-A	∞	∞
119964728	Q8N465	D2HDH	D-2-hydroxyglutarate dehydrogenase, mitochondrial	∞	∞
24308444	Q96MX6	DAA10	WD repeat-containing protein 92	∞	13.0513	1
294997308	Q14118	DAG1	dystroglycan preproprotein	∞	∞
4557511	O43293	DAPK3	death-associated protein kinase 3	∞	3.23986
66267730	Q96EX3	DC2I2	WD repeat-containing protein 34	∞	∞
30089954	Q5TAQ9	DCAF8	DDB1- and CUL4-associated factor 8	∞	∞
7661734	Q96C86	DCPS	m7GpppX diphosphatase	∞	5.70616	1
61742821	P32321	DCTD	deoxycytidylate deaminase	∞	3.60242
208431793	Q9UJW0	DCTN4	dynactin subunit 4	∞	6.8041
30181242	O43602	DCX	neuronal migration protein doublecortin	∞	4.87598
256017247	O94830	DDHD2	phospholipase DDHD2	∞	∞
41327779	Q8NHQ9	DDX55	ATP-dependent RNA helicase DDX55	∞	∞	1.11664
9506931	Q9NY93	DDX56	probable ATP-dependent RNA helicase DDX56	∞	6.23777	1.07107
11641243	Q9HBH1	DEFM	peptide deformylase, mitochondrial	∞	∞
4505193	O15121	DEGS1	sphingolipid delta(4)-desaturase DES1	∞	∞
18426967	Q16854	DGUOK	deoxyguanosine kinase, mitochondrial	∞	5.11813	1
223718074	P14061	DHB1	estradiol 17-beta-dehydrogenase 1	∞	4.00945
66933014	Q9BUT1	DHRS6	3-hydroxybutyrate dehydrogenase type 2	∞	3.184	1
7706318	Q9Y394	DHRS7	dehydrogenase/reductase SDR family member 7	∞	40.9554	0.632276
4506865	O14521	DHSD	succinate dehydrogenase [ubiquinone] cytochrome b small subunit, mitochondrial	∞	2.50871
255982614	O60231	DHX16	putative pre-mRNA-splicing factor ATP-dependent RNA helicase DHX16	∞	6.67147	1.43315
20336300	Q7L7V1	DHX32	putative pre-mRNA-splicing factor ATP-dependent RNA helicase DHX32	∞	∞
4503325	P49366	DHYS	deoxyhypusine synthase	∞	12.0231
21553323	O95057	DIRA1	GTP-binding protein Di-Ras1	∞	4.31029
24308127	Q8IXB1	DJC10	dnaJ homolog subfamily C member 10	∞	8.53707
11141871	Q9UKB3	DJC12	dnaJ homolog subfamily C member 12	∞	∞
56687498	Q9Y2G8	DJC16	dnaJ homolog subfamily C member 16	∞	∞	0.000484706
148539578	Q12959	DLG1	disks large homolog 1	∞	13.8864	0.000563297
194328758	Q8WW22	DNJA4	dnaJ homolog subfamily A member 4	∞	∞	1
17388799	O75190	DNJB6	dnaJ homolog subfamily B member 6	∞	4.72763
73747829	P49916	DNLI3	DNA ligase 3lpha	∞	16.1892	1.35114
148539894	P49917	DNLI4	DNA ligase 4	∞	∞	0.842813
156416028	Q9ULA0	DNPEP	aspartyl aminopeptidase	∞	5.14316	1.34244
5454002	O43598	DNPH1	2'-deoxynucleoside 5'-phosphate N-hydrolase 1	∞	2.90157
157426887	Q96HP0	DOCK6	dedicator of cytokinesis protein 6	∞	∞	1.39539
223633884	Q9BU89	DOHH	deoxyhypusine hydroxylase	∞	∞	1
24586663	Q8NEU8	DP13B	DCC-interacting protein 13-beta	∞	7.78944
39930355	Q9BVM2	DPCD	protein DPCD	∞	12.854	1
116686106	Q9BZG8	DPH1	diphthamide biosynthesis protein 1	∞	17.7001
21536476	Q9BQC3	DPH2	diphthamide biosynthesis protein 2	∞	∞
117190326	Q9H2P9	DPH5	diphthine synthase	∞	∞
24308452	Q9BTV6	DPH7	WD repeat-containing protein 85	∞	∞
19549327	Q96EV8	DTBP1	dysbindin	∞	∞
30795227	Q8TEA8	DTD1	D-tyrosyl-tRNA(Tyr) deacylase 1	∞	7.89533
24308169	Q8TD57	DYH3	dynein heavy chain 3, axonemal	∞	1.70129
19115954	Q8TE73	DYH5	dynein heavy chain 5, axonemal	∞	∞
56549125	P50570	DYN2	dynamin-2	∞	6.49661
32490572	Q9Y2J2	E41L3	band 4.1-like protein 3	∞	16.9501
117938268	Q56P03	EAPP	E2F-associated phosphoprotein	∞	∞	1.39405
70995211	Q13011	ECH1	delta(3,5)-Delta(2,4)-dienoyl-CoA isomerase, mitochondrial	∞	13.2245	1
68989263	Q08426	ECHP	peroxisomal bifunctional enzyme	∞	∞	0.843773
20149675	Q96C19	EFHD2	EF-hand domain-containing protein D2	∞	7.22316
13489073	Q9GZT9	EGLN1	egl nine homolog 1	∞	19.4925	1
217330568	Q8NDI1	EHBP1	EH domain-binding protein 1	∞	∞
21361462	Q9NZN4	EHD2	EH domain-containing protein 2	∞	∞
5031711	O60739	EIF1B	eukaryotic translation initiation factor 1b	∞	6.98538
10801345	Q9UBQ5	EIF3K	eukaryotic translation initiation factor 3 subunit K	∞	6.99812	1
24308456	Q8IZ81	ELMD2	ELMO domain-containing protein 2	∞	3.19005	1
33469947	Q96JJ3	ELMO2	engulfment and cell motility protein 2	∞	∞	0.75098
325652043	Q15369	ELOC	transcription elongation factor B polypeptide 1	∞	6.05691	1.4574
262359929	Q8WYP5	ELYS	protein ELYS	∞	∞
8923857	Q9P0I2	EMC3	ER membrane protein complex subunit 3	∞	∞
27735037	Q8N4V1	EMC5	membrane magnesium transporter 1	∞	∞
31542298	Q9Y3B6	EMC9	ER membrane protein complex subunit 9	∞	∞
4557553	P50402	EMD	emerin	∞	7.89436	1.404
56549694	Q8N8S7	ENAH	protein enabled homolog	∞	18.143	1.42329
301897477	P13929	ENOB	beta-enolase	∞	4.15543
39930531	Q5NDL2	EOGT	EGF domain-specific O-linked N-acetylglucosamine transferase	∞	∞
32967311	P29317	EPHA2	ephrin type-A receptor 2	∞	∞
21396504	P29323	EPHB2	ephrin type-B receptor 2	∞	∞
94818901	Q9NZ08	ERAP1	endoplasmic reticulum aminopeptidase 1	∞	∞
58331268	Q2NKX8	ERC6L	DNA excision repair protein ERCC-6-like	∞	8.83555
42544169	P07992	ERCC1	DNA excision repair protein ERCC-1	∞	∞
5803048	P24390	ERD21	ER lumen protein retaining receptor 1	∞	∞
46094014	Q8IYD1	ERF3B	eukaryotic peptide chain release factor GTP-binding subunit ERF3B	∞	4.5773	1
117414150	O76062	ERG24	delta(14)-sterol reductase	∞	5.01839
74136559	O43414	ERI3	ERI1 exoribonuclease 3	∞	∞
119703746	Q16134	ETFD	electron transfer flavoprotein-ubiquinone oxidoreductase, mitochondrial	∞	6.26062
47174864	Q9NQT4	EXOS5	exosome complex component RRP46	∞	4.59688	1.44163
189083688	Q15024	EXOS7	exosome complex component RRP42	∞	5.81121	1.49061
189491675	Q96C01	F136A	protein FAM136A	∞	13.1396	1
4758900	Q16875	F263	6-phosphofructo-2-kinase/fructose-2,6-bisphosphatase 3	∞	9.42152
4758902	Q16877	F264	6-phosphofructo-2-kinase/fructose-2,6-bisphosphatase 4	∞	∞
7705268	Q9UBU6	FA8A1	protein FAM8A1	∞	∞	1
18379366	O75844	FACE1	CAAX prenyl protease 1 homolog	∞	5.73147	1
156231349	Q96GK7	FAH2A	fumarylacetoacetate hydrolase domain-containing protein 2A	∞	∞	1
301897118	Q9BX63	FANCJ	Fanconi anemia group J protein	∞	6.90626	1
45505155	Q6PIJ6	FBX38	F-box only protein 38	∞	∞
74229027	Q9Y3I1	FBX7	F-box only protein 7	∞	7.17981	1.35456
124248558	Q5XUX1	FBXW9	F-box/WD repeat-containing protein 9	∞	5.29508
226371723	Q0JRZ9	FCHO2	FCH domain only protein 2	∞	∞
206725530	P26885	FKBP2	peptidyl-prolyl cis-trans isomerase FKBP2	∞	5.47494
33469985	O95302	FKBP9	peptidyl-prolyl cis-trans isomerase FKBP9	∞	∞
5031699	O75955	FLOT1	flotillin-1	∞	6.86206
160707881	Q9NZ56	FMN2	formin-2	∞	∞
38524622	Q96RU3	FNBP1	formin-binding protein 1	∞	9.2694
205360934	Q53EP0	FND3B	fibronectin type III domain-containing protein 3B	∞	∞	1
4885243	P15407	FOSL1	fos-related antigen 1	∞	12.9325
31563338	Q01167	FOXK2	forkhead box protein K2	∞	∞
42519916	O43524	FOXO3	forkhead box protein O3	∞	3.2117
510025466	O14772	FPGT	fucose-1-phosphate guanylyltransferase	∞	1.51821
117500790	A2A2Y4	FRMD3	FERM domain-containing protein 3	∞	5.44882
100816392	Q96I24	FUBP3	far upstream element-binding protein 3	∞	4.64654	1.44298
119360348	P04066	FUCO	tissue alpha-L-fucosidase	∞	7.14609
4826734	P35637	FUS	RNA-binding protein FUS	∞	3.19982	1
45359846	Q9UN86	G3BP2	ras GTPase-activating protein-binding protein 2	∞	6.65146
31543415	Q8TAE8	G45IP	growth arrest and DNA damage-inducible proteins-interacting protein 1	∞	∞
52145310	O95479	G6PE	GDH/6PGL endoplasmic bifunctional protein	∞	16.0544
256219543	O43826	G6PT1	glucose-6-phosphate translocase	∞	∞
308818209	Q06546	GABPA	GA-binding protein alpha chain	∞	∞	1
32699045	Q8NB37	GALD1	Parkinson disease 7 domain-containing protein 1	∞	7.46099	1
4503897	Q01415	GALK2	N-acetylgalactosamine kinase	∞	∞
13124891	Q10472	GALT1	polypeptide N-acetylgalactosaminyltransferase 1	∞	∞
4758412	Q10471	GALT2	polypeptide N-acetylgalactosaminyltransferase 2	∞	5.58141	1
4503909	Q14353	GAMT	guanidinoacetate N-methyltransferase	∞	∞
66346737	Q8TET4	GANC	neutral alpha-glucosidase C	∞	∞
11641247	Q9H4G4	GAPR1	Golgi-associated plant pathogenesis-related protein 1	∞	4.31618
296434277	Q96D09	GASP2	G-protein coupled receptor-associated sorting protein 2	∞	∞
222831590	Q9H0R6	GATA	glutamyl-tRNA(Gln) amidotransferase subunit A, mitochondrial	∞	∞
50978624	O43716	GATC	glutamyl-tRNA(Gln) amidotransferase subunit C, mitochondrial	∞	∞
344313198	P59768	GBG2	guanine nucleotide-binding protein G(I)/G(S)/G(O) subunit gamma-2	∞	5.61227
44662838	P48728	GCST	aminomethyltransferase, mitochondrial	∞	6.72634
30581160	Q96MZ0	GD1L1	ganglioside-induced differentiation-associated protein 1-like 1	∞	6.72697
7706617	Q9NZC3	GDE1	glycerophosphodiester phosphodiesterase 1	∞	∞
153792495	Q99988	GDF15	growth/differentiation factor 15	∞	13.1089
116642895	Q6ZNW5	GDPP1	GDP-D-glucose phosphorylase 1	∞	9.17453
4506961	O14893	GEMI2	gem-associated protein 2lpha	∞	∞	0.966917
9558729	Q9UJY5	GGA1	ADP-ribosylation factor-binding protein GGA1	∞	7.7358	1
9558751	Q9UJY4	GGA2	ADP-ribosylation factor-binding protein GGA2	∞	∞
20336267	Q9NZ52	GGA3	ADP-ribosylation factor-binding protein GGA3	∞	∞	1
4503987	Q92820	GGH	gamma-glutamyl hydrolase	∞	9.38559	1
8923557	Q9NWU2	GID8	glucose-induced degradation protein 8 homolog	∞	∞	1.38057
42544144	O14908	GIPC1	PDZ domain-containing protein GIPC1	∞	9.26872
55742678	Q86VQ1	GLCI1	glucocorticoid-induced transcript 1 protein	∞	∞	1
326381123	P32189	GLPK	glycerol kinase	∞	8.18945
343887376	P35754	GLRX1	glutaredoxin-1	∞	7.36739	1
22547186	P34896	GLYC	serine hydroxymethyltransferase, cytosolic	∞	6.95415	1.14792
40556376	Q49A26	GLYR1	putative oxidoreductase GLYR1	∞	11.3244
13435377	Q9Y692	GMEB1	glucocorticoid modulatory element-binding protein 1	∞	∞
45447090	Q96IJ6	GMPPA	mannose-1-phosphate guanyltransferase alpha	∞	9.13691	1.21689
115511049	P29992	GNA11	guanine nucleotide-binding protein subunit alpha-11	∞	5.96403
33946324	P63096	GNAI1	guanine nucleotide-binding protein G(i) subunit alpha-1	∞	∞	1
19923881	Q8TDQ7	GNPI2	glucosamine-6-phosphate isomerase 2	∞	12.7108
4504061	P15586	GNS	N-acetylglucosamine-6-sulfatase	∞	5.13568	1
289577134	Q13439	GOGA4	Golgin subfamily A member 4	∞	1.78213
110227846	Q9BXV9	GON7	uncharacterized protein C14orf142	∞	∞	1
29826294	Q9H8Y8	GORS2	Golgi reassembly-stacking protein 2	∞	12.4747	1
24307999	Q8N335	GPD1L	glycerol-3-phosphate dehydrogenase 1-like protein	∞	3.69204	1
285002233	P43304	GPDM	glycerol-3-phosphate dehydrogenase, mitochondrial	∞	5.23968	1
256818744	Q9UHW5	GPN3	GPN-loop GTPase 3	∞	∞	1
6912388	P28676	GRAN	grancalcin	∞	5.34131	1
24308295	Q9HAV7	GRPE1	grpE protein homolog 1, mitochondrial	∞	4.85711	1
237820620	Q9BQ67	GRWD1	glutamate-rich WD repeat-containing protein 1	∞	5.93785	1.36993
188536092	O60443	GSDME	non-syndromic hearing impairment protein 5	∞	5.4851	1.118
149588660	Q8NEC7	GSTCD	glutathione S-transferase C-terminal domain-containing protein	∞	2.77825	1.42453
4504175	P28161	GSTM2	glutathione S-transferase Mu 2	∞	3.32747	0.315506
193082988	Q969Y2	GTPB3	tRNA modification GTPase GTPBP3, mitochondrialV	∞	∞
8923920	Q9P0M6	H2AW	core histone macro-H2A.2	∞	∞
116875852	Q8IYU2	HACE1	E3 ubiquitin-protein ligase HACE1	∞	4.56944
93004078	Q9UJ83	HACL1	2-hydroxyacyl-CoA lyase 1	∞	∞	1
4504345	P69905	HBA	hemoglobin subunit alpha	∞	∞	1
13128864	Q9UBN7	HDAC6	histone deacetylase 6	∞	5.10899	1.11585
116875826	Q7Z4H3	HDDC2	HD domain-containing protein 2	∞	∞	1
197382691	Q08623	HDHD1	pseudouridine-5'-monophosphatase	∞	7.17276
189083849	P13716	HEM2	delta-aminolevulinic acid dehydratase	∞	8.08761
189181666	P06865	HEXA	beta-hexosaminidase subunit alpha preproprotein	∞	25.553
4504373	P07686	HEXB	beta-hexosaminidase subunit beta preproprotein	∞	12.6057
5453682	O94992	HEXI1	protein HEXIM1	∞	11.6503	1.42121
148596936	Q9NWT6	HIF1N	hypoxia-inducible factor 1-alpha inhibitor	∞	6.86749
189217863	Q9NQE9	HINT3	histidine triad nucleotide-binding protein 3	∞	∞	1
62198232	P35914	HMGCL	hydroxymethylglutaryl-CoA lyase, mitochondrial	∞	∞	1
14165274	Q86VS8	HOOK3	protein Hook homolog 3	∞	32.3751	1
40254986	Q6YN16	HSDL2	hydroxysteroid dehydrogenase-like protein 2	∞	4.96784	1
5031767	Q00613	HSF1	heat shock factor protein 1	∞	2.62717
48928056	P48723	HSP13	heat shock 70 kDa protein 13	∞	∞
4758576	O60921	HUS1	checkpoint protein HUS1	∞	∞
166063983	Q8NFM7	I17RD	interleukin-17 receptor D	∞	∞
88853865	Q2TAA2	IAH1	isoamyl acetate-hydrolyzing esterase 1 homolog	∞	5.16738	1
109637759	P20810	ICAL	calpastatin	∞	∞	1
28178821	O43837	IDH3B	isocitrate dehydrogenase [NAD] subunit beta, mitochondrial	∞	7.31673	1.46187
4758582	P51553	IDH3G	isocitrate dehydrogenase [NAD] subunit gamma, mitochondrial	∞	∞	1.06537
40018633	Q13907	IDI1	isopentenyl-diphosphate Delta-isomerase 1	∞	3.42488	1.45219
50053795	P23588	IF4B	eukaryotic translation initiation factor 4B	∞	20.5549	1
219555661	Q8WYA0	IFT81	intraflagellar transport protein 81 homolog	∞	∞
4557663	P78318	IGBP1	immunoglobulin-binding protein 1	∞	12.1471
4557665	P08069	IGF1R	insulin-like growth factor 1 receptor	∞	∞
21361135	Q15653	IKBB	NF-kappa-B inhibitor beta	∞	∞
42491362	Q70UQ0	IKIP	inhibitor of nuclear factor kappa-B kinase-interacting protein	∞	11.0196
24430212	Q5VWK5	IL23R	interleukin-23 receptor	∞	2.35929	0.954151
224589129	A9QM74	IMA8	importin subunit alpha-8	∞	5.18875
8922794	Q9NV31	IMP3	U3 small nucleolar ribonucleoprotein protein IMP3	∞	∞
157388900	Q9NX62	IMPA3	inositol monophosphatase 3	∞	∞
149999380	Q27J81	INF2	inverted formin-2	∞	19.9184	1
7705558	Q9NPH2	INO1	inositol-3-phosphate synthase 1	∞	4.47761	0.89493
156104897	O15327	INP4B	type II inositol 3,4-bisphosphate 4-phosphatase	∞	5.42418
193083155	P49441	INPP	inositol polyphosphate 1-phosphatase	∞	∞	1
338827648	Q92551	IP6K1	inositol hexakisphosphate kinase 1	∞	∞
116089337	Q13576	IQGA2	ras GTPase-activating-like protein IQGAP2	∞	16.1353	0.960912
7705819	Q9Y5U9	IR3IP	immediate early response 3-interacting protein 1	∞	∞	0.00164153
52426768	Q9BUE6	ISCA1	iron-sulfur cluster assembly 1 homolog, mitochondrial	∞	∞
157412259	A4D126	ISPD	Isoprenoid synthase domain-containing protein	∞	∞
401709930	P53990	IST1	IST1 homolog	∞	5.65166
125988411	Q8N4P2	IT70B	tetratricopeptide repeat protein 30B	∞	10.6413
52485941	Q13797	ITA9	integrin alpha-9	∞	∞
19743819	P05556	ITB1	integrin beta-1D	∞	∞
217272844	Q13572	ITPK1	inositol-tetrakisphosphate 1-kinase	∞	12.5814
47717123	Q15811	ITSN1	intersectin-1TSN-l	∞	∞
217330641	Q96ST2	IWS1	protein IWS1 homolog	∞	∞	1
94557297	Q9UPT6	JIP3	C-Jun-amino-terminal kinase-interacting protein 3	∞	12.9794	0.21978
125988395	Q6NYC1	JMJD6	bifunctional arginine demethylase and lysyl-hydroxylase JMJD6	∞	12.9838	1
257467654	Q9HCM3	K1549	UPF0606 protein KIAA1549	∞	∞	1
131412225	P13646	K1C13	keratin, type I cytoskeletal 13	∞	∞
4502013	P54819	KAD2	adenylate kinase 2, mitochondrial	∞	11.0777
258613977	P31321	KAP1	cAMP-dependent protein kinase type I-beta regulatory subunit	∞	9.56401
209571547	Q9NVX7	KBTB4	kelch repeat and BTB domain-containing protein 4	∞	∞	1
68303575	P48729	KC1A	casein kinase Ilpha	∞	9.42283
4502553	Q14012	KCC1A	calcium/calmodulin-dependent protein kinase type 1	∞	3.77709
19923973	Q96CX2	KCD12	BTB/POZ domain-containing protein KCTD12	∞	∞	1
194018443	Q96SI1	KCD15	BTB/POZ domain-containing protein KCTD15	∞	11.4236
9506651	Q9NXV2	KCTD5	BTB/POZ domain-containing protein KCTD5	∞	5.84731
109255243	P41229	KDM5C	lysine-specific demethylase 5C	∞	∞
338827698	Q16774	KGUA	guanylate kinase	∞	13.4059
4557693	P50053	KHK	ketohexokinase	∞	12.6472
156616271	Q2TAC6	KIF19	kinesin-like protein KIF19	∞	∞
166795250	Q99661	KIF2C	kinesin-like protein KIF2C	∞	∞	1.12171
4758646	O15066	KIF3B	kinesin-like protein KIF3B	∞	∞
13124883	O60870	KIN17	DNA/RNA-binding protein KIN17	∞	7.64948	1.0889
41871960	Q9NSK0	KLC4	kinesin light chain 4	∞	4.51996
7657301	Q9Y2U9	KLDC2	kelch domain-containing protein 2	∞	2.05589
24432026	Q53GT1	KLH22	kelch-like protein 22	∞	∞
256818754	Q96CT2	KLH29	kelch-like protein 29	∞	9.04301
148762969	O14686	KMT2D	histone-lysine N-methyltransferase MLL2	∞	8.78358
5031689	O94806	KPCD3	serine/threonine-protein kinase D3	∞	∞	1.09676
117676403	Q13601	KRR1	KRR1 small subunit processome component homolog	∞	∞
83779014	Q9BVA0	KTNB1	katanin p80 WD40 repeat-containing subunit B1	∞	∞	1.29878
7705793	Q53H82	LACB2	beta-lactamase-like protein 2	∞	∞
167614504	P07942	LAMB1	laminin subunit beta-1	∞	∞
71979932	Q01650	LAT1	large neutral amino acids transporter small subunit 1	∞	∞
74048434	Q9UIC8	LCMT1	leucine carboxyl methyltransferase 1	∞	7.06996	1.41794
115430223	P17931	LEG3	galectin-3	∞	5.21891
156151366	Q3ZCW2	LEGL	galectin-related protein	∞	6.25789	1
5031863	Q08380	LG3BP	galectin-3-binding protein	∞	6.54068
269847098	Q9H008	LHPP	phospholysine phosphohistidine inorganic pyrophosphate phosphatase	∞	∞
7705373	Q9UHB6	LIMA1	LIM domain and actin-binding protein 1	∞	14.0056
163310741	Q9UPQ0	LIMC1	LIM and calponin homology domains-containing protein 1	∞	8.07685	1
32189362	O75145	LIPA3	liprin-alpha-3	∞	∞
214010240	Q9H0V9	LMA2L	VIP36-like protein	∞	∞
38176151	Q9C0E8	LNP	protein lunapark	∞	7.80407
31377667	Q86WA8	LONP2	lon protease homolog 2, peroxisomal	∞	∞	0.2687
126012562	Q07954	LRP1	prolow-density lipoprotein receptor-related protein 1	∞	∞
6912488	Q9Y4Y9	LSM5	U6 snRNA-associated Sm-like protein LSm5	∞	∞	1
5901998	P62312	LSM6	U6 snRNA-associated Sm-like protein LSm6	∞	∞	1
7706423	Q9UK45	LSM7	U6 snRNA-associated Sm-like protein LSm7	∞	7.32151	1
231573214	O94822	LTN1	E3 ubiquitin-protein ligase listerin	∞	7.39013	1.27091
7661728	Q9Y2Q5	LTOR2	ragulator complex protein LAMTOR2	∞	∞	1
38788353	O43504	LTOR5	ragulator complex protein LAMTOR5	∞	∞
119393895	P10253	LYAG	lysosomal alpha-glucosidase preproprotein	∞	∞
91176333	Q5U5X0	LYRM7	complex III assembly factor LYRM7	∞	3.47268
21362062	Q8WZA0	LZIC	protein LZIC	∞	∞	0.000194754
9966793	Q9NQ48	LZTL1	leucine zipper transcription factor-like protein 1	∞	7.39592
10440566	Q9Y250	LZTS1	leucine zipper putative tumor suppressor 1	∞	6.13897	0.00104895
19526767	Q9NYL2	M3K20	mitogen-activated protein kinase kinase kinase MLT	∞	∞
42794767	Q99759	M3K3	mitogen-activated protein kinase kinase kinase 3	∞	3.67303
21735562	O43318	M3K7	mitogen-activated protein kinase kinase kinase 7	∞	∞
22035606	O95819	M4K4	mitogen-activated protein kinase kinase kinase kinase 4	∞	6.5712
51477714	Q16706	MA2A1	alpha-mannosidase 2	∞	2.5071
209862994	Q8WXG6	MADD	MAP kinase-activating death domain protein	∞	∞
62953131	Q7L5Y9	MAEA	macrophage erythroblast attacher	∞	∞	1.21381
52632381	Q9Y5V3	MAGD1	melanoma-associated antigen D1	∞	2.7826	1.48349
4505143	P48163	MAOX	NADP-dependent malic enzyme	∞	3.58985	1
50428935	Q66K74	MAP1S	microtubule-associated protein 1S	∞	9.71773	1.39387
153070260	P29966	MARCS	myristoylated alanine-rich C-kinase substrate	∞	∞	1
10346135	Q15555	MARE2	microtubule-associated protein RP/EB family member 2	∞	3.27281	1.47723
8923415	Q9NX47	MARH5	E3 ubiquitin-protein ligase MARCH5	∞	8.37113	0.889699
19923977	Q96EH3	MASU1	mitochondrial assembly of ribosomal large subunit protein 1	∞	28.1154	1
4505225	P51948	MAT1	CDK-activating kinase assembly factor MAT1	∞	∞	1.02672
83776598	Q7Z434	MAVS	mitochondrial antiviral-signaling protein	∞	∞
24308440	Q96EY5	MB12A	multivesicular body subunit 12A	∞	4.10618	1
40548387	Q6ZWT7	MBOA2	lysophospholipid acyltransferase 2	∞	21.5992
42542394	Q6P1A2	MBOA5	lysophospholipid acyltransferase 5	∞	∞
158508476	Q05BQ5	MBTD1	MBT domain-containing protein 1	∞	∞	1
4557403	O43772	MCAT	mitochondrial carnitine/acylcarnitine carrier protein	∞	9.31159
134142828	O60942	MCE1	mRNA-capping enzyme	∞	∞	1.4724
109698611	Q8IX19	MCEM1	mast cell-expressed membrane protein 1	∞	11.6402
227496440	Q6DN12	MCTP2	multiple C2 and transmembrane domain-containing protein 2	∞	∞
205360930	Q6P9B6	MEAK7	TLD domain-containing protein KIAA1609	∞	9.10749	1
28558971	Q9ULK4	MED23	mediator of RNA polymerase II transcription subunit 23	∞	27.5382	1.26132
24762241	O14770	MEIS2	homeobox protein Meis2	∞	∞	1.45738
7661974	Q14680	MELK	maternal embryonic leucine zipper kinase	∞	∞
66932918	Q12866	MERTK	tyrosine-protein kinase Mer	∞	3.40981
92859575	Q9NRN9	METL5	methyltransferase-like protein 5	∞	∞	0.702775
116014336	Q9H1A3	METL9	methyltransferase-like protein 9	∞	∞
45269137	Q8IWA4	MFN1	mitofusin-1	∞	7.68811	1
19923957	Q96ES6	MFSD3	major facilitator superfamily domain-containing protein 3	∞	∞
4505163	Q10469	MGAT2	alpha-1,6-mannosyl-glycoprotein 2-beta-N-acetylglucosaminyltransferase	∞	∞
4505087	P61326	MGN	protein mago nashi homolog	∞	11.2136
324120893	Q99735	MGST2	microsomal glutathione S-transferase 2	∞	∞	0.940246
4758714	O14880	MGST3	microsomal glutathione S-transferase 3	∞	7.0186	1.26045
335334986	A9UHW6	MI4GD	MIF4G domain-containing protein	∞	∞	1
42822891	Q9BRT3	MIEN1	migration and invasion enhancer 1	∞	∞
225735607	Q8N108	MIER1	mesoderm induction early response protein 1	∞	∞
19923761	Q9UNW1	MINP1	multiple inositol polyphosphate phosphatase 1	∞	∞	1
13376431	Q9H8M7	MINY3	protein FAM188A	∞	13.0796	1
21389357	Q8NDC0	MISSL	MAPK-interacting and spindle-stabilizing protein-like	∞	∞
379698839	Q96ER9	MITOK	coiled-coil domain-containing protein 51	∞	∞	1
156105685	Q9NUT2	MITOS	ATP-binding cassette sub-family B member 8, mitochondrial	∞	∞
209529736	Q13164	MK07	mitogen-activated protein kinase 7	∞	22.2172
20986510	P53779	MK10	mitogen-activated protein kinase 10	∞	15.3006
20128774	Q15759	MK11	mitogen-activated protein kinase 11	∞	∞
20986512	Q16539	MK14	mitogen-activated protein kinase 14	∞	∞	1
31563518	Q9H492	MLP3A	microtubule-associated proteins 1A/1B light chain 3A	∞	4.36995
16418349	Q96EY8	MMAB	cob(I)yrinic acid a,c-diamide adenosyltransferase, mitochondrial	∞	∞	1
11342666	P08253	MMP2	72 kDa type IV collagenase preproprotein	∞	9.70091
28631173	O96033	MOC2A	molybdopterin synthase catalytic subunit small subunit MOCS2A	∞	∞
215820630	Q86VX9	MON1A	vacuolar fusion protein MON1 homolog A	∞	∞
114326552	Q7Z3U7	MON2	protein MON2 homolog	∞	21.9376	1
148746189	O75970	MPDZ	multiple PDZ domain protein	∞	∞
4505235	P34949	MPI	mannose-6-phosphate isomerase	∞	∞
116517313	O75352	MPU1	mannose-P-dolichol utilization defect 1 protein	∞	∞	1
40068479	Q6IN84	MRM1	rRNA methyltransferase 1, mitochondrial	∞	6.648	1.43106
157502201	O15439	MRP4	multidrug resistance-associated protein 4	∞	∞
62988276	O15091	MRPP3	mitochondrial ribonuclease P protein 3	∞	∞	1.21005
189571647	Q6P1R3	MSD2	myb/SANT-like DNA-binding domain-containing protein 2	∞	∞
117606353	Q9Y3D2	MSRB2	methionine-R-sulfoxide reductase B2, mitochondrial	∞	16.9265	1
21361827	Q86U44	MTA70	N6-adenosine-methyltransferase 70 kDa subunit	∞	3.14257	1.46387
59806361	Q5TF21	MTCL3	Microtubule cross-linking factor 3	∞	7.69307	1.46458
5453746	P49914	MTHFS	5-formyltetrahydrofolate cyclo-ligase	∞	∞	1
28872761	Q13613	MTMR1	myotubularin-related protein 1	∞	20.5236	1
44680154	Q13614	MTMR2	myotubularin-related protein 2	∞	2.40131	1.05345
134142348	Q9Y217	MTMR6	myotubularin-related protein 6	∞	∞	0.234992
225543474	Q9Y216	MTMR7	myotubularin-related protein 7	∞	∞
117938270	Q8NCE2	MTMRE	myotubularin-related protein 14	∞	∞	0.000385396
72534748	Q9BV20	MTNA	methylthioribose-1-phosphate isomerase	∞	13.0702	1.32018
31542641	O75648	MTU1	mitochondrial tRNA-specific 2-thiouridylase 1	∞	4.73723
5729937	O75431	MTX2	metaxin-2	∞	∞	1
83367077	Q8WXI7	MUC16	mucin-16	∞	3.90236
56549131	P84157	MXRA7	matrix-remodeling-associated protein 7	∞	30.5944
110624781	Q9UKX3	MYH13	myosin-13	∞	∞
116008192	Q15746	MYLK	myosin light chain kinase, smooth muscle	∞	14.3331
7305053	Q9NZM1	MYOF	myoferlin	∞	6.05059
140560919	P52179	MYOM1	myomesin-1	∞	5.98126
148596957	Q14896	MYPC3	myosin-binding protein C, cardiac-type	∞	∞
7705823	P61599	NAA20	N-alpha-acetyltransferase 20	∞	2.58219
19923348	Q13506	NAB1	NGFI-A-binding protein 1	∞	∞
226437579	O15069	NACAD	NAC-alpha domain-containing protein 1	∞	10.2766	1
16418383	Q96RE7	NACC1	nucleus accumbens-associated protein 1	∞	4.75396	1
224922791	Q9Y303	NAGA	putative N-acetylglucosamine-6-phosphate deacetylase	∞	8.16782
14165461	Q9UHQ1	NARF	nuclear prelamin A recognition factor	∞	∞
23943862	Q8WUY8	NAT14	N-acetyltransferase 14	∞	3.90628	1.23765
49574502	Q9UHQ9	NB5R1	NADH-cytochrome b5 reductase 1	∞	8.12502	1.10993
166295179	Q53F19	NCBP3	uncharacterized protein C17orf85	∞	∞
5453754	P16333	NCK1	cytoplasmic protein NCK1	∞	∞
170932526	Q8NI08	NCOA7	nuclear receptor coactivator 7	∞	5.82136
207028748	Q92597	NDRG1	protein NDRG1	∞	∞
194440722	Q9ULP0	NDRG4	protein NDRG4	∞	∞
7657369	P51970	NDUA8	NADH dehydrogenase [ubiquinone] 1 alpha subcomplex subunit 8	∞	∞
38569473	O75438	NDUB1	NADH dehydrogenase [ubiquinone] 1 beta subcomplex subunit 1	∞	∞	0.648795
380036038	O43676	NDUB3	NADH dehydrogenase [ubiquinone] 1 beta subcomplex subunit 3	∞	∞
4758774	O96000	NDUBA	NADH dehydrogenase [ubiquinone] 1 beta subcomplex subunit 10	∞	2.10757	0.000289385
20127561	Q9NX14	NDUBB	NADH dehydrogenase [ubiquinone] 1 beta subcomplex subunit 11, mitochondrial	∞	5.46321
4758784	O95298	NDUC2	NADH dehydrogenase [ubiquinone] 1 subunit C2	∞	9.17582	1.20011
4758792	O75380	NDUS6	NADH dehydrogenase [ubiquinone] iron-sulfur protein 6, mitochondrial	∞	∞
4505371	O00217	NDUS8	NADH dehydrogenase [ubiquinone] iron-sulfur protein 8, mitochondrial	∞	8.71469
140972063	Q96SB3	NEB2	neurabin-2	∞	4.91795
47087157	O76041	NEBL	nebulette	∞	∞	1
8922416	Q9NVZ3	NECP2	adaptin ear-binding coat-associated protein 2	∞	6.59547
206597465	Q8NHV4	NEDD1	protein NEDD1	∞	∞	1.10259
114520607	P46934	NEDD4	E3 ubiquitin-protein ligase NEDD4	∞	∞	0.000474142
194248057	P17677	NEUM	neuromodulin	∞	∞	1
4557791	Q99519	NEUR1	sialidase-1	∞	11.4111
46447823	Q8NCF5	NF2IP	NFATC2-interacting protein	∞	6.63098	1.46408
34577122	P19838	NFKB1	nuclear factor NF-kappa-B p105 subunit	∞	5.77163	1
117320531	Q00653	NFKB2	nuclear factor NF-kappa-B p100 subunit	∞	∞	1
105990539	P07196	NFL	neurofilament light polypeptide	∞	3.37258
4759140	O14745	NHRF1	Na(+)/H(+) exchange regulatory cofactor NHE-RF1	∞	7.72399	1
194018553	Q15599	NHRF2	Na(+)/H(+) exchange regulatory cofactor NHE-RF2	∞	∞
16757970	Q9BZQ8	NIBA1	protein Niban	∞	7.67105
31542207	Q86XR2	NIBA3	niban-like protein 2	∞	3.06261	1
209862879	Q9GZT8	NIF3L	NIF3-like protein 1	∞	∞	1
193211616	Q9BPW8	NIPS1	protein NipSnap homolog 1	∞	8.39163	1.47713
66472382	Q9Y2I1	NISCH	nischarin	∞	∞
25777608	Q86UT6	NLRX1	NLR family member X1	∞	7.1144	0.00135646
119709830	Q8IW45	NNRD	ATP-dependent (S)-NAD(P)H-hydrate dehydratase	∞	7.72952
21361468	Q9H8H0	NOL11	nucleolar protein 11	∞	∞	1
444299624	O60936	NOL3	nucleolar protein 3	∞	2.4934
18644728	Q9H6R4	NOL6	nucleolar protein 6	∞	∞
61097912	Q5C9Z4	NOM1	nucleolar MIF4G domain-containing protein 1	∞	∞	1.26284
51944953	Q15155	NOMO1	nodal modulator 1	∞	6.38615
323635436	P29475	NOS1	nitric oxide synthase, brain	∞	∞
56549653	P51513	NOVA1	RNA-binding protein Nova-1	∞	∞
24371268	Q96NT1	NP1L5	nucleosome assembly protein 1-like 5	∞	7.20738	1
156231351	Q9UHC9	NPCL1	Niemann-Pick C1-like protein 1	∞	9.0383
22267436	Q9UFN0	NPS3A	protein NipSnap homolog 3A	∞	∞
4505415	P15559	NQO1	NAD(P)H dehydrogenase [quinone] 1	∞	4.69665	1
28882043	Q86WQ0	NR2CA	nuclear receptor 2C2-associated protein	∞	2.6346	1.28942
193211614	Q15738	NSDHL	sterol-4-alpha-carboxylate 3-dehydrogenase, decarboxylating	∞	5.7433	1
8922281	Q96HA8	NTAQ1	protein N-terminal glutamine amidohydrolase	∞	∞
56676399	Q9BV86	NTM1A	N-terminal Xaa-Pro-Lys N-methyltransferase 1	∞	∞
251831117	P03915	NU5M	NADH dehydrogenase subunit 5	∞	2.31361	1
251831118	P03923	NU6M	NADH dehydrogenase subunit 6	∞	∞	1
20070228	Q02818	NUCB1	nucleobindin-1	∞	∞
13899267	Q9BQG2	NUD12	peroxisomal NADH pyrophosphatase NUDT12	∞	13.723
122939165	Q8IVD9	NUDC3	nudC domain-containing protein 3	∞	10.8673	1
40317632	Q9NZJ9	NUDT4	diphosphoinositol polyphosphate phosphohydrolase 2lpha	∞	4.58067
20149583	P53370	NUDT6	nucleoside diphosphate-linked moiety X motif 6	∞	3.11496
13129010	Q9BW91	NUDT9	ADP-ribose pyrophosphatase, mitochondrial	∞	∞
54144625	P49757	NUMB	protein numb homolog	∞	∞	1.08356
26051237	Q7Z3B4	NUP54	nucleoporin p54	∞	14.3559
33149331	Q6DKJ4	NXN	nucleoredoxin	∞	16.856	0.000765852
21361724	Q9NPJ8	NXT2	NTF2-related export protein 2	∞	11.6441
144226847	O75147	OBSL1	obscurin-like protein 1	∞	∞
203098753	O00330	ODPX	pyruvate dehydrogenase protein X component, mitochondrial	∞	2.85206
27436889	Q9H488	OFUT1	GDP-fucose protein O-fucosyltransferase 1	∞	2.07156
221316661	Q9ULD0	OGDHL	2-oxoglutarate dehydrogenase-like, mitochondrial	∞	1.8278	1
224496106	Q9Y3B8	ORN	oligoribonuclease, mitochondrial	∞	8.71096
115334675	Q96BN8	OTUL	protein FAM105B	∞	4.2944
9506641	Q9NUU6	OTULL	protein FAM105A	∞	6.29328
342837704	Q32P28	P3H1	prolyl 3-hydroxylase 1	∞	4.75237
13559514	Q9BTU6	P4K2A	phosphatidylinositol 4-kinase type 2-alpha	∞	13.3022
4758878	Q99487	PAFA2	platelet-activating factor acetylhydrolase 2, cytoplasmic	∞	∞
190886457	Q13153	PAK1	serine/threonine-protein kinase PAK 1	∞	∞
112789550	Q9UKK3	PARP4	poly [ADP-ribose] polymerase 4	∞	4.17489
51477696	Q9HBI1	PARVB	beta-parvin	∞	3.5775
189217919	Q86TB9	PATL1	protein PAT1 homolog 1	∞	∞	1
93141033	Q6ZW49	PAXI1	PAX-interacting protein 1	∞	∞
32306539	Q9BVG4	PBDC1	protein PBDC1	∞	6.7168	1
27436887	P40425	PBX2	pre-B-cell leukemia transcription factor 2	∞	∞	1
14589920	Q9BZA7	PC11X	protocadherin-11 X-linked	∞	4.67749
47086907	Q7L5N7	PCAT2	lysophosphatidylcholine acyltransferase 2	∞	6.72542
166795301	Q9UHG3	PCYOX	prenylcysteine oxidase 1	∞	12.8473
226442763	Q8NBM8	PCYXL	prenylcysteine oxidase-like	∞	6.6234	1
40254434	Q13370	PDE3B	cGMP-inhibited 3',5'-cyclic phosphodiesterase B	∞	∞
4505671	O43924	PDE6D	retinal rod rhodopsin-sensitive cGMP 3',5'-cyclic phosphodiesterase subunit delta	∞	4.06027
5803121	Q14554	PDIA5	protein disulfide-isomerase A5	∞	1.84282	1.39982
29837655	Q9BY77	PDIP3	polymerase delta-interacting protein 3	∞	∞	0.000438776
215422338	Q15120	PDK3	pyruvate dehydrogenase kinase, isozyme 3	∞	∞
239985426	Q9P0J1	PDP1	pyruvate dehyrogenase phosphatase catalytic subunit 1	∞	∞
4505701	O00764	PDXK	pyridoxal kinase	∞	7.6852	1
6912582	Q9UBV8	PEF1	peflin	∞	6.13938	1
7657455	O00541	PESC	pescadillo homolog	∞	3.98349	1.49868
4758896	O75381	PEX14	peroxisomal membrane protein PEX14	∞	∞
4506339	P40855	PEX19	peroxisomal biogenesis factor 19	∞	16.3017	0.000699728
196259770	P50542	PEX5	peroxisomal biogenesis factor 5	∞	9.1566	1
12408677	Q9NQP4	PFD4	prefoldin subunit 4	∞	54.3046	1
266453768	P08237	PFKAM	6-phosphofructokinase, muscle type	∞	4.78467
4505683	P09619	PGFRB	platelet-derived growth factor receptor beta	∞	∞
84508631	Q32NB8	PGPS1	CDP-diacylglycerol--glycerol-3-phosphate 3-phosphatidyltransferase, mitochondrial	∞	∞	1
291621647	O15173	PGRC2	membrane-associated progesterone receptor component 2	∞	4.78588
53828918	Q92696	PGTA	geranylgeranyl transferase type-2 subunit alpha	∞	6.55371	1.45325
221307584	Q99623	PHB2	prohibitin-2	∞	5.53662	1
226371739	Q8TBX8	PI42C	phosphatidylinositol 5-phosphate 4-kinase type-2 gamma	∞	6.64128
4505809	Q9UBF8	PI4KB	phosphatidylinositol 4-kinase beta	∞	∞
31317309	O60331	PI51C	phosphatidylinositol 4-phosphate 5-kinase type-1 gamma	∞	∞
56699458	O75928	PIAS2	E3 SUMO-protein ligase PIAS2eta	∞	5.67503
56788366	Q13492	PICAL	phosphatidylinositol-binding clathrin assembly protein	∞	∞	1.16117
23397653	Q969N2	PIGT	GPI transamidase component PIG-T	∞	9.47815
38679892	Q9Y237	PIN4	peptidyl-prolyl cis-trans isomerase NIMA-interacting 4	∞	∞	1
5453908	Q00169	PIPNA	phosphatidylinositol transfer protein alpha isoform	∞	9.4322
21361837	Q9GZP4	PITH1	PITH domain-containing protein 1	∞	2.66098	1
195927015	O00562	PITM1	membrane-associated phosphatidylinositol transfer protein 1	∞	∞
55769546	Q9NWT1	PK1IP	p21-activated protein kinase-interacting protein 1	∞	7.10475	0.868908
5453894	P42338	PK3CB	phosphatidylinositol 4,5-bisphosphate 3-kinase catalytic subunit beta isoform	∞	2.81435	1
8922333	Q9NW61	PKHJ1	pleckstrin homology domain-containing family J member 1	∞	∞
229093316	Q8NHP8	PLBL2	putative phospholipase B-like 2	∞	∞
53828920	Q63HM9	PLCX3	PI-PLC X domain-containing protein 3	∞	∞
176866369	Q6UW63	PLGT2	KDEL motif-containing protein 1	∞	5.17098	1
153218487	Q7Z4H8	PLGT3	KDEL motif-containing protein 2	∞	7.49352
255958282	O60664	PLIN3	perilipin-3	∞	∞
288915536	Q14651	PLSI	plastin-1	∞	∞
313851069	Q6P1K2	PMF1	PMF1-BGLAP protein	∞	∞
40353764	P07738	PMGE	bisphosphoglycerate mutase	∞	5.22718	1
4505911	P54277	PMS1	PMS1 protein homolog 1	∞	5.37281	0.763491
52486265	Q8ND90	PNMA1	paraneoplastic antigen Ma1	∞	∞
10047140	Q9NRX1	PNO1	RNA-binding protein PNO1	∞	∞	1.04666
157168362	P00491	PNPH	purine nucleoside phosphorylase	∞	5.68755	1
8922498	Q9NVS9	PNPO	pyridoxine-5'-phosphate oxidase	∞	11.4943	1
66529294	Q15165	PON2	serum paraoxonase/arylesterase 2	∞	7.85547
14149716	Q9BZL4	PP12C	protein phosphatase 1 regulatory subunit 12C	∞	4.13634	1
11386175	O60927	PP1RB	protein phosphatase 1 regulatory subunit 11	∞	∞
345842412	P48454	PP2BC	serine/threonine-protein phosphatase 2B catalytic subunit gamma isoform	∞	7.93056
154816186	Q86T03	PP4P1	transmembrane protein 55B	∞	∞
108936953	Q8TF05	PP4R1	serine/threonine-protein phosphatase 4 regulatory subunit 1	∞	6.57841
119395729	P10619	PPGB	lysosomal protective protein	∞	1.54902
4505991	P45877	PPIC	peptidyl-prolyl cis-trans isomerase C	∞	12.1054
22547215	Q13356	PPIL2	peptidyl-prolyl cis-trans isomerase-like 2	∞	∞	1.10111
19557636	Q9H2H8	PPIL3	peptidyl-prolyl cis-trans isomerase-like 3	∞	10.9393
30089948	Q8WY54	PPM1E	protein phosphatase 1E	∞	12.6938	1
7661862	P49593	PPM1F	protein phosphatase 1F	∞	5.96579	1
63003905	Q5SGD2	PPM1L	protein phosphatase 1L	∞	2.32446
24308049	Q96BP3	PPWD1	peptidylprolyl isomerase domain and WD repeat-containing protein 1	∞	∞	1
5453704	O75915	PRAF3	PRA1 family protein 3	∞	9.63834
149192855	Q5JSZ5	PRC2B	protein PRRC2B	∞	∞	1
115298682	Q9Y520	PRC2C	protein PRRC2C	∞	7.61429	1.2745
334085248	Q5JRX3	PREP	presequence protease, mitochondrial	∞	5.99756	1.35056
222136684	Q96MT3	PRIC1	prickle-like protein 1	∞	2.80108
397174762	Q92786	PROX1	prospero homeobox protein 1	∞	∞
4506123	Q99633	PRP18	pre-mRNA-splicing factor 18	∞	3.08209
156938331	Q86UA1	PRP39	pre-mRNA-processing factor 39	∞	14.2555
4758556	O43395	PRPF3	U4/U6 small nuclear ribonucleoprotein Prp3	∞	4.88061	1.36132
4506181	P25787	PSA2	proteasome subunit alpha type-2	∞	15.4917	1
22538467	P28070	PSB4	proteasome subunit beta type-4	∞	3.56328	1
4506201	P28074	PSB5	proteasome subunit beta type-5	∞	3.83013	0.708915
7706367	Q9Y248	PSF2	DNA replication complex GINS protein PSF2	∞	7.57026
187169264	Q9BRX5	PSF3	DNA replication complex GINS protein PSF3	∞	5.79377
197245458	Q9BT73	PSMG3	proteasome assembly chaperone 3	∞	∞	1
153792604	Q7Z6K3	PTAR1	protein prenyltransferase alpha subunit repeat-containing protein 1	∞	∞
226246682	Q8N8N7	PTGR2	prostaglandin reductase 2	∞	∞
28557745	Q8N4Q0	PTGR3	zinc-binding alcohol dehydrogenase domain-containing protein 2	∞	∞
196114951	Q05209	PTN12	tyrosine-protein phosphatase non-receptor type 12	∞	9.01682	1
333108231	P17706	PTN2	tyrosine-protein phosphatase non-receptor type 2	∞	13.0984	1.11329
7662647	P48651	PTSS1	phosphatidylserine synthase 1	∞	1.69297	1.30925
13540555	Q9BVG9	PTSS2	phosphatidylserine synthase 2	∞	∞
15147219	Q96QR8	PURB	transcriptional activator protein Pur-beta	∞	5.73566	1
199559785	Q9BZE2	PUS3	tRNA pseudouridine(38/39) synthase	∞	∞	1
5902034	Q13610	PWP1	periodic tryptophan protein 1 homolog	∞	∞	1
109150416	Q92626	PXDN	peroxidasin homolog	∞	4.70262	1.45651
344925832	Q9BRX8	PXL2A	redox-regulatory protein FAM213A	∞	∞
71037379	P06737	PYGL	glycogen phosphorylase, liver form	∞	10.6074	1
90669511	O95825	QORL1	quinone oxidoreductase-like protein 1	∞	4.69382
106507164	Q6IQ22	RAB12	ras-related protein Rab-12	∞	13.734
19923483	P61106	RAB14	ras-related protein Rab-14	∞	32.9103
7661922	Q9UL25	RAB21	ras-related protein Rab-21	∞	∞	1
4506365	P61019	RAB2A	ras-related protein Rab-2A	∞	4.78458	1.42305
4506367	P20336	RAB3A	ras-related protein Rab-3A	∞	5.50391	1
19923985	Q96E17	RAB3C	ras-related protein Rab-3C	∞	4.40234
4759000	O95716	RAB3D	ras-related protein Rab-3D	∞	∞
19923262	P20339	RAB5A	ras-related protein Rab-5A	∞	5.18317	1
354725902	P61020	RAB5B	ras-related protein Rab-5B	∞	5.9295
305855090	P51151	RAB9A	ras-related protein Rab-9A	∞	10.6388
31377798	Q15276	RABE1	rab GTPase-binding effector protein 1	∞	∞	1
386781571	P35241	RADI	radixin	∞	350.42	1
33946329	P11233	RALA	ras-related protein Ral-A	∞	5.71777	1
8051631	Q9UKM9	RALY	RNA-binding protein Raly	∞	6.39944	1
154240692	Q86SE5	RALYL	RNA-binding Raly-like protein	∞	5.8764
10518344	P10114	RAP2A	ras-related protein Rap-2a	∞	11.3689
47132519	Q70E73	RAPH1	ras-associated and pleckstrin homology domains-containing protein 1	∞	8.22727	1
38201692	Q14644	RASA3	ras GTPase-activating protein 3	∞	∞
4505451	P01111	RASN	GTPase NRas	∞	7.09458
190358517	Q15907	RB11B	ras-related protein Rab-11B	∞	2.74919	1
54607124	Q8NDT2	RB15B	putative RNA-binding protein 15B	∞	∞
39930371	Q14964	RB39A	ras-related protein Rab-39A	∞	6.34686	1
25188193	Q96DA2	RB39B	ras-related protein Rab-39B	∞	∞
24119166	O75884	RBBP9	putative hydrolase RBBP9	∞	∞
78217386	Q5R372	RBG1L	rab GTPase-activating protein 1-like	∞	9.03187
226497734	Q9Y4C8	RBM19	probable RNA-binding protein 19	∞	∞
168229174	Q9P2N5	RBM27	RNA-binding protein 27	∞	∞	1.30577
5032031	P52756	RBM5	RNA-binding protein 5	∞	∞
5032033	P78332	RBM6	RNA-binding protein 6	∞	∞
295148142	Q6XE24	RBMS3	RNA-binding motif, single-stranded-interacting protein 3	∞	5.59812
5803145	Q15311	RBP1	ralA-binding protein 1	∞	9.14226
40538736	Q6VN20	RBP10	ran-binding protein 10	∞	∞	1
7657508	P62877	RBX1	E3 ubiquitin-protein ligase RBX1	∞	4.98815	1.45134
4506455	Q15293	RCN1	reticulocalbin-1	∞	5.17897
[truncated: 2,135 more rows]
