# Supplementary material for: Chemoproteomic profiling by a bioorthogonal probe reveals cell growth inhibition by histone H4 dopaminylation
Source: Research Square preprint supplement (doi:10.21203/rs.3.rs-4710338/v1), 2024-07-16
Supplement: Supplementary file 3 [file d8c9c4ff9deb2cb7dfdbb762.xlsx]

## Sheet: Sheet1
Pre-Dopamine						Post-Dopamine
ChIP-seq Peak Position			Annotation	GeneId	Distance To TSS	ChIP-seq Peak Position			Annotation	GeneId	Distance To TSS
chr1	136583	136949	Promoter	ENSG00000268903.1	-688	chr1	136624	136915	Promoter	ENSG00000268903.1	-729
chr1	137845	138085	Promoter	ENSG00000269981.1	0	chr1	138336	138551	Promoter	ENSG00000269981.1	-371
chr1	138416	138656	Promoter	ENSG00000269981.1	-451	chr1	138769	139530	Promoter	ENSG00000237683.5	0
chr1	757494	757930	Distal Intergenic	ENSG00000240453.1	-4402	chr1	756939	757154	Distal Intergenic	ENSG00000240453.1	-3847
chr1	777066	777306	Exon (ENST00000441765.1/ENSG00000228794.4, exon 3 of 3)	ENSG00000228794.4	-9422	chr1	779061	779353	Intron (ENST00000445118.2/ENSG00000228794.4, intron 2 of 4)	ENSG00000228794.4	-7375
chr1	779000	779240	Intron (ENST00000445118.2/ENSG00000228794.4, intron 2 of 4)	ENSG00000228794.4	-7488	chr1	800329	800918	Distal Intergenic	ENSG00000230368.2	4663
chr1	784890	785297	Exon (ENST00000610067.1/ENSG00000228794.4, exon 4 of 5)	ENSG00000228794.4	-1431	chr1	801582	801814	Distal Intergenic	ENSG00000230368.2	3767
chr1	791916	792241	Exon (ENST00000445118.2/ENSG00000228794.4, exon 5 of 5)	ENSG00000228794.4	5188	chr1	812630	813268	Promoter	ENSG00000230368.2	-347
chr1	796205	796522	Distal Intergenic	ENSG00000230368.2	9059	chr1	848739	849212	Promoter	ENSG00000241180.1	-339
chr1	798254	798575	Distal Intergenic	ENSG00000230368.2	7006	chr1	851478	851704	Downstream (<=300bp)	ENSG00000241180.1	1927
chr1	799444	799770	Distal Intergenic	ENSG00000230368.2	5811	chr1	853700	854089	Promoter	ENSG00000223764.2	0
chr1	800409	800940	Distal Intergenic	ENSG00000230368.2	4641	chr1	854367	855215	Promoter	ENSG00000223764.2	0
chr1	801592	802255	Distal Intergenic	ENSG00000230368.2	3326	chr1	861648	861880	Promoter	ENSG00000187634.6	530
chr1	809031	809613	Promoter	ENSG00000234711.1	359	chr1	863224	863480	Exon (ENST00000598827.1/ENSG00000268179.1, exon 5 of 6)	ENSG00000187634.6	2106
chr1	810477	810801	Exon (ENST00000446136.1/ENSG00000230368.2, exon 2 of 3)	ENSG00000230368.2	1381	chr1	863796	864113	Intron (ENST00000420190.1/ENSG00000187634.6, intron 2 of 6)	ENSG00000187634.6	-1579
chr1	812209	812500	Promoter	ENSG00000230368.2	0	chr1	865266	865591	Promoter	ENSG00000187634.6	-101
chr1	835467	835725	Distal Intergenic	ENSG00000272438.1	-4489	chr1	865753	865986	Promoter	ENSG00000187634.6	61
chr1	837556	837929	Distal Intergenic	ENSG00000272438.1	-2285	chr1	867897	868277	Intron (ENST00000420190.1/ENSG00000187634.6, intron 4 of 6)	ENSG00000268179.1	-1452
chr1	846122	846406	Promoter	ENSG00000230699.2	-409	chr1	868813	869065	Intron (ENST00000420190.1/ENSG00000187634.6, intron 4 of 6)	ENSG00000268179.1	-2368
chr1	848606	849057	Promoter	ENSG00000241180.1	-494	chr1	872264	872537	Intron (ENST00000420190.1/ENSG00000187634.6, intron 5 of 6)	ENSG00000187634.6	-2118
chr1	849776	850059	Promoter	ENSG00000241180.1	225	chr1	883290	883716	Promoter	ENSG00000188976.6	-850
chr1	851127	851384	Exon (ENST00000607769.1/ENSG00000272438.1, exon 2 of 2)	ENSG00000241180.1	1576	chr1	884701	884997	Intron (ENST00000327044.6/ENSG00000188976.6, intron 12 of 18)	ENSG00000188976.6	-2261
chr1	853346	854156	Promoter	ENSG00000223764.2	0	chr1	885604	886458	Intron (ENST00000327044.6/ENSG00000188976.6, intron 12 of 18)	ENSG00000188976.6	-3164
chr1	855335	855659	Promoter	ENSG00000223764.2	-263	chr1	887256	889021	Exon (ENST00000327044.6/ENSG00000188976.6, exon 9 of 19)	ENSG00000188976.6	-4816
chr1	857161	857723	Promoter	ENSG00000223764.2	-765	chr1	897062	897517	Promoter	ENSG00000187961.9	233
chr1	858086	858476	Distal Intergenic	ENSG00000223764.2	-1690	chr1	897850	898606	Promoter	ENSG00000187961.9	0
chr1	862090	862330	Promoter	ENSG00000187634.6	972	chr1	898837	899422	Promoter	ENSG00000187961.9	0
chr1	865397	865733	Promoter	ENSG00000187634.6	0	chr1	900777	901053	Promoter	ENSG00000187583.6	-824
chr1	867411	867652	Promoter	ENSG00000268179.1	-966	chr1	901393	901972	Promoter	ENSG00000187583.6	0
chr1	868475	868715	Intron (ENST00000420190.1/ENSG00000187634.6, intron 4 of 6)	ENSG00000268179.1	-2030	chr1	903026	903346	Intron (ENST00000379410.3/ENSG00000187583.6, intron 2 of 15)	ENSG00000187583.6	1144
chr1	874897	875438	Promoter	ENSG00000187634.6	242	chr1	903880	904132	Intron (ENST00000379410.3/ENSG00000187583.6, intron 2 of 15)	ENSG00000187583.6	1998
chr1	880431	880760	Promoter	ENSG00000188976.6	182	chr1	905814	906245	Promoter	ENSG00000187583.6	-10
chr1	883085	883510	Promoter	ENSG00000188976.6	-645	chr1	907007	907733	Promoter	ENSG00000187583.6	752
chr1	886841	887997	Exon (ENST00000327044.6/ENSG00000188976.6, exon 10 of 19)	ENSG00000188976.6	-4401	chr1	908222	908876	Promoter	ENSG00000187583.6	-16
chr1	888657	888977	Exon (ENST00000327044.6/ENSG00000188976.6, exon 9 of 19)	ENSG00000188976.6	4861	chr1	909023	909580	Promoter	ENSG00000187583.6	131
chr1	889535	890302	Exon (ENST00000477976.1/ENSG00000188976.6, exon 5 of 17)	ENSG00000188976.6	3536	chr1	914742	915501	Exon (ENST00000433179.2/ENSG00000187642.5, exon 3 of 5)	ENSG00000187642.5	1972
chr1	893141	893633	Promoter	ENSG00000188976.6	205	chr1	915810	916086	Exon (ENST00000433179.2/ENSG00000187642.5, exon 3 of 5)	ENSG00000187642.5	1387
chr1	896802	897553	Promoter	ENSG00000187961.9	0	chr1	917317	917584	Promoter	ENSG00000187642.5	0
chr1	899358	899945	Promoter	ENSG00000187961.9	426	chr1	917782	918069	Promoter	ENSG00000187642.5	-285
chr1	900820	901432	Promoter	ENSG00000187583.6	-445	chr1	918345	918786	Promoter	ENSG00000187642.5	-848
chr1	902571	903990	Promoter	ENSG00000187583.6	689	chr1	928867	929211	Distal Intergenic	ENSG00000272512.1	4220
chr1	906057	906358	Promoter	ENSG00000187583.6	0	chr1	931328	932064	Exon (ENST00000606034.1/ENSG00000272512.1, exon 1 of 1)	ENSG00000272512.1	1367
chr1	907099	907359	Promoter	ENSG00000187583.6	844	chr1	940469	940684	Distal Intergenic	ENSG00000231702.2	2925
chr1	908041	908538	Promoter	ENSG00000187583.6	-354	chr1	942215	942487	Distal Intergenic	ENSG00000231702.2	1122
chr1	909127	909418	Promoter	ENSG00000187583.6	235	chr1	946146	946361	Distal Intergenic	ENSG00000224969.1	2212
chr1	909969	910501	3' UTR	ENSG00000187583.6	1077	chr1	948794	949009	Promoter	ENSG00000187608.5	0
chr1	910662	911020	3' UTR	ENSG00000187642.5	1001	chr1	958026	958440	Intron (ENST00000379370.2/ENSG00000188157.9, intron 2 of 35)	ENSG00000188157.9	2523
chr1	913655	914323	Exon (ENST00000433179.2/ENSG00000187642.5, exon 3 of 5)	ENSG00000187642.5	-1634	chr1	958690	959061	Intron (ENST00000379370.2/ENSG00000188157.9, intron 2 of 35)	ENSG00000188157.9	3187
chr1	914597	915131	Exon (ENST00000433179.2/ENSG00000187642.5, exon 3 of 5)	ENSG00000187642.5	2342	chr1	959713	960549	Intron (ENST00000379370.2/ENSG00000188157.9, intron 2 of 35)	ENSG00000188157.9	4210
chr1	915325	916528	Promoter	ENSG00000187642.5	945	chr1	961120	961376	Intron (ENST00000379370.2/ENSG00000188157.9, intron 2 of 35)	ENSG00000188157.9	5617
chr1	916685	917178	Promoter	ENSG00000187642.5	295	chr1	962017	963647	Intron (ENST00000379370.2/ENSG00000188157.9, intron 2 of 35)	ENSG00000188157.9	-5839
chr1	917520	917760	Promoter	ENSG00000187642.5	-23	chr1	970131	970421	Promoter	ENSG00000188157.9	0
chr1	917952	918542	Promoter	ENSG00000187642.5	-455	chr1	972068	972883	Intron (ENST00000379370.2/ENSG00000188157.9, intron 3 of 35)	ENSG00000188157.9	1821
chr1	928789	929366	Distal Intergenic	ENSG00000272512.1	4065	chr1	973214	973456	Intron (ENST00000379370.2/ENSG00000188157.9, intron 3 of 35)	ENSG00000188157.9	2967
chr1	938855	939598	Distal Intergenic	ENSG00000188290.6	-3303	chr1	977195	977463	Exon (ENST00000379370.2/ENSG00000188157.9, exon 7 of 36)	ENSG00000188157.9	-3316
chr1	942402	942642	Promoter	ENSG00000231702.2	967	chr1	977756	978389	Intron (ENST00000379370.2/ENSG00000188157.9, intron 7 of 35)	ENSG00000188157.9	-2390
chr1	944320	944718	Promoter	ENSG00000231702.2	-711	chr1	978560	979040	Exon (ENST00000379370.2/ENSG00000188157.9, exon 8 of 36)	ENSG00000188157.9	-1739
chr1	948840	949485	Promoter	ENSG00000187608.5	37	chr1	979327	979549	Exon (ENST00000379370.2/ENSG00000188157.9, exon 10 of 36)	ENSG00000188157.9	-1230
chr1	953456	954045	Distal Intergenic	ENSG00000188157.9	-1458	chr1	979781	981642	Promoter	ENSG00000188157.9	0
chr1	956785	957140	Intron (ENST00000379370.2/ENSG00000188157.9, intron 1 of 35)	ENSG00000188157.9	1282	chr1	981907	982705	Promoter	ENSG00000188157.9	0
chr1	958359	958604	Intron (ENST00000379370.2/ENSG00000188157.9, intron 2 of 35)	ENSG00000188157.9	2856	chr1	984708	985227	Promoter	ENSG00000188157.9	-709
chr1	959021	959396	Intron (ENST00000379370.2/ENSG00000188157.9, intron 2 of 35)	ENSG00000188157.9	3518	chr1	985411	985827	Promoter	ENSG00000188157.9	-109
chr1	959835	960248	Intron (ENST00000379370.2/ENSG00000188157.9, intron 2 of 35)	ENSG00000188157.9	4332	chr1	986161	986391	Promoter	ENSG00000188157.9	225
chr1	960445	960926	Intron (ENST00000379370.2/ENSG00000188157.9, intron 2 of 35)	ENSG00000188157.9	4942	chr1	986787	987096	Promoter	ENSG00000188157.9	-270
chr1	962516	963476	Intron (ENST00000379370.2/ENSG00000188157.9, intron 2 of 35)	ENSG00000188157.9	-6010	chr1	987316	987717	Promoter	ENSG00000188157.9	0
chr1	970141	970756	Promoter	ENSG00000188157.9	0	chr1	988500	989073	Exon (ENST00000419249.1/ENSG00000188157.9, exon 8 of 9)	ENSG00000188157.9	1134
chr1	971000	971318	Promoter	ENSG00000188157.9	753	chr1	989867	990312	Promoter	ENSG00000242590.1	-101
chr1	971557	972101	Intron (ENST00000379370.2/ENSG00000188157.9, intron 3 of 35)	ENSG00000188157.9	1310	chr1	991059	991415	Promoter	ENSG00000242590.1	646
chr1	972549	972789	Intron (ENST00000379370.2/ENSG00000188157.9, intron 3 of 35)	ENSG00000188157.9	2302	chr1	993639	993854	Distal Intergenic	ENSG00000217801.5	-1260
chr1	972963	973361	Intron (ENST00000379370.2/ENSG00000188157.9, intron 3 of 35)	ENSG00000188157.9	2716	chr1	999621	999868	Promoter	ENSG00000217801.5	-7
chr1	973796	974036	Intron (ENST00000379370.2/ENSG00000188157.9, intron 3 of 35)	ENSG00000188157.9	3549	chr1	1006322	1006687	3' UTR	ENSG00000237330.2	3000
chr1	977362	977887	Exon (ENST00000379370.2/ENSG00000188157.9, exon 7 of 36)	ENSG00000188157.9	-2892	chr1	1006921	1007218	3' UTR	ENSG00000237330.2	2469
chr1	978051	978828	Exon (ENST00000379370.2/ENSG00000188157.9, exon 8 of 36)	ENSG00000188157.9	-1951	chr1	1008865	1009960	Promoter	ENSG00000237330.2	0
chr1	979167	980840	Promoter	ENSG00000188157.9	0	chr1	1016431	1016979	Distal Intergenic	ENSG00000131591.13	2473
chr1	981208	981600	Promoter	ENSG00000188157.9	429	chr1	1017238	1017620	3' UTR	ENSG00000131591.13	1832
chr1	982334	982574	Promoter	ENSG00000188157.9	-7	chr1	1018373	1018930	Promoter	ENSG00000131591.13	522
chr1	984595	984835	Promoter	ENSG00000188157.9	686	chr1	1020338	1020888	Promoter	ENSG00000131591.13	-886
chr1	986161	986401	Promoter	ENSG00000188157.9	225	chr1	1021286	1022544	Promoter	ENSG00000131591.13	472
chr1	986734	988244	Promoter	ENSG00000188157.9	0	chr1	1023936	1024151	Promoter	ENSG00000131591.13	-920
chr1	989023	989416	Promoter	ENSG00000242590.1	-997	chr1	1027698	1027953	Promoter	ENSG00000131591.13	-24
chr1	990413	991733	Promoter	ENSG00000242590.1	0	chr1	1046114	1046404	Intron (ENST00000379339.1/ENSG00000131591.13, intron 2 of 11)	ENSG00000131591.13	-4607
chr1	993186	993644	Distal Intergenic	ENSG00000217801.5	-1470	chr1	1046683	1046898	Intron (ENST00000379339.1/ENSG00000131591.13, intron 2 of 11)	ENSG00000131591.13	4563
chr1	998757	999130	Promoter	ENSG00000273443.1	-89	chr1	1048432	1048890	Intron (ENST00000379339.1/ENSG00000131591.13, intron 2 of 11)	ENSG00000131591.13	2571
chr1	1003256	1003496	Exon (ENST00000412397.2/ENSG00000217801.5, exon 8 of 10)	ENSG00000217801.5	3358	chr1	1054286	1054501	Distal Intergenic	ENSG00000131591.13	-2545
chr1	1005257	1005594	Distal Intergenic	ENSG00000237330.2	4093	chr1	1055595	1056008	Distal Intergenic	ENSG00000131591.13	-3854
chr1	1005810	1006259	Distal Intergenic	ENSG00000237330.2	3428	chr1	1057024	1057434	Distal Intergenic	ENSG00000131591.13	-5283
chr1	1008474	1008977	Promoter	ENSG00000237330.2	710	chr1	1058977	1059192	Distal Intergenic	ENSG00000131591.13	-7236
chr1	1009448	1009936	Promoter	ENSG00000237330.2	0	chr1	1059423	1059710	Distal Intergenic	ENSG00000131591.13	-7682
chr1	1010820	1011060	Distal Intergenic	ENSG00000237330.2	-1133	chr1	1060195	1060550	Distal Intergenic	ENSG00000131591.13	-8454
chr1	1016446	1016726	Distal Intergenic	ENSG00000131591.13	2726	chr1	1060777	1060997	Distal Intergenic	ENSG00000131591.13	-9036
chr1	1017015	1017493	3' UTR	ENSG00000131591.13	1959	chr1	1061349	1061688	Distal Intergenic	ENSG00000131591.13	-9608
chr1	1018079	1019016	Promoter	ENSG00000131591.13	436	chr1	1061850	1062654	Distal Intergenic	ENSG00000223823.1	-9743
chr1	1019297	1022103	Promoter	ENSG00000131591.13	0	chr1	1063269	1064252	Distal Intergenic	ENSG00000223823.1	-8145
chr1	1024157	1024743	Intron (ENST00000379339.1/ENSG00000131591.13, intron 6 of 11)	ENSG00000131591.13	-1141	chr1	1064525	1064942	Distal Intergenic	ENSG00000223823.1	-7455
chr1	1025264	1025517	Intron (ENST00000379339.1/ENSG00000131591.13, intron 6 of 11)	ENSG00000131591.13	1940	chr1	1067004	1067418	Distal Intergenic	ENSG00000223823.1	-4979
chr1	1025878	1026263	3' UTR	ENSG00000131591.13	1194	chr1	1068100	1068503	Distal Intergenic	ENSG00000223823.1	-3894
chr1	1027943	1028318	Promoter	ENSG00000131591.13	0	chr1	1069677	1070059	Distal Intergenic	ENSG00000223823.1	-2338
chr1	1039318	1039558	Intron (ENST00000379339.1/ENSG00000131591.13, intron 2 of 11)	ENSG00000131591.13	1949	chr1	1071322	1072315	Promoter	ENSG00000223823.1	-82
chr1	1042004	1042284	Promoter	ENSG00000131591.13	-497	chr1	1072759	1073230	Promoter	ENSG00000223823.1	362
chr1	1046980	1047328	Intron (ENST00000379339.1/ENSG00000131591.13, intron 2 of 11)	ENSG00000131591.13	4133	chr1	1077099	1077614	Intron (ENST00000416774.1/ENSG00000223823.1, intron 2 of 2)	ENSG00000223823.1	4702
chr1	1047563	1048026	Intron (ENST00000379339.1/ENSG00000131591.13, intron 2 of 11)	ENSG00000131591.13	3435	chr1	1077922	1078366	Exon (ENST00000416774.1/ENSG00000223823.1, exon 3 of 3)	ENSG00000223823.1	5525
chr1	1059813	1060564	Distal Intergenic	ENSG00000131591.13	-8072	chr1	1078700	1078934	Exon (ENST00000416774.1/ENSG00000223823.1, exon 3 of 3)	ENSG00000223823.1	6303
chr1	1060727	1061044	Distal Intergenic	ENSG00000131591.13	-8986	chr1	1080597	1080847	Distal Intergenic	ENSG00000223823.1	8200
chr1	1062654	1063702	Distal Intergenic	ENSG00000223823.1	-8695	chr1	1081505	1082328	Distal Intergenic	ENSG00000223823.1	9108
chr1	1067931	1068381	Distal Intergenic	ENSG00000223823.1	-4016	chr1	1082845	1083206	Distal Intergenic	ENSG00000223823.1	10448
chr1	1070396	1070636	Distal Intergenic	ENSG00000223823.1	-1761	chr1	1083771	1084238	Distal Intergenic	ENSG00000223823.1	11374
chr1	1071293	1071748	Promoter	ENSG00000223823.1	-649	chr1	1084412	1084897	Distal Intergenic	ENSG00000223823.1	12015
chr1	1073126	1073397	Promoter	ENSG00000223823.1	729	chr1	1085168	1086249	Distal Intergenic	ENSG00000223823.1	12771
chr1	1078101	1080073	Exon (ENST00000416774.1/ENSG00000223823.1, exon 3 of 3)	ENSG00000223823.1	5704	chr1	1086744	1087319	Distal Intergenic	ENSG00000223823.1	14347
chr1	1080315	1081120	Distal Intergenic	ENSG00000223823.1	7918	chr1	1089273	1089615	Distal Intergenic	ENSG00000207730.1	-12869
chr1	1081507	1083445	Distal Intergenic	ENSG00000223823.1	9110	chr1	1090196	1090411	Distal Intergenic	ENSG00000207730.1	-12073
chr1	1084078	1085429	Distal Intergenic	ENSG00000223823.1	11681	chr1	1091024	1091297	Distal Intergenic	ENSG00000207730.1	-11187
chr1	1086133	1086439	Distal Intergenic	ENSG00000223823.1	13736	chr1	1094388	1094632	Distal Intergenic	ENSG00000207730.1	-7852
chr1	1086742	1087145	Distal Intergenic	ENSG00000223823.1	14345	chr1	1095313	1096108	Distal Intergenic	ENSG00000207730.1	-6376
chr1	1087942	1088182	Distal Intergenic	ENSG00000207730.1	-14302	chr1	1096342	1097408	Distal Intergenic	ENSG00000207730.1	-5076
chr1	1089707	1089947	Distal Intergenic	ENSG00000207730.1	-12537	chr1	1098772	1098987	Distal Intergenic	ENSG00000207730.1	-3497
chr1	1090811	1091792	Distal Intergenic	ENSG00000207730.1	-10692	chr1	1099814	1100368	Distal Intergenic	ENSG00000207730.1	-2116
chr1	1093758	1094398	Distal Intergenic	ENSG00000207730.1	-8086	chr1	1101066	1101702	Promoter	ENSG00000207730.1	-782
chr1	1094910	1095308	Distal Intergenic	ENSG00000207730.1	-7176	chr1	1102303	1103293	Promoter	ENSG00000207607.1	0
chr1	1095555	1095795	Distal Intergenic	ENSG00000207730.1	-6689	chr1	1103557	1104557	Promoter	ENSG00000198976.1	0
chr1	1096157	1096990	Distal Intergenic	ENSG00000207730.1	-5494	chr1	1104795	1106733	Promoter	ENSG00000272141.1	58
chr1	1097778	1098424	Distal Intergenic	ENSG00000207730.1	-4060	chr1	1107470	1107969	Distal Intergenic	ENSG00000162571.9	-1295
chr1	1100603	1101444	Distal Intergenic	ENSG00000207730.1	-1040	chr1	1108394	1108742	Promoter	ENSG00000162571.9	-522
chr1	1101946	1104012	Promoter	ENSG00000207607.1	0	chr1	1108897	1109259	Promoter	ENSG00000162571.9	-5
chr1	1104371	1105388	Promoter	ENSG00000198976.1	0	chr1	1109773	1110273	Promoter	ENSG00000162571.9	487
chr1	1107028	1107801	Distal Intergenic	ENSG00000162571.9	-1463	chr1	1110944	1111456	Exon (ENST00000379317.1/ENSG00000205231.1, exon 2 of 2)	ENSG00000162571.9	1658
chr1	1108684	1108963	Promoter	ENSG00000162571.9	-301	chr1	1111668	1112189	Exon (ENST00000379317.1/ENSG00000205231.1, exon 2 of 2)	ENSG00000162571.9	2382
chr1	1109408	1109733	Promoter	ENSG00000162571.9	122	chr1	1113161	1113616	Intron (ENST00000379290.1/ENSG00000162571.9, intron 3 of 15)	ENSG00000205231.1	1319
chr1	1111157	1111465	Exon (ENST00000379317.1/ENSG00000205231.1, exon 2 of 2)	ENSG00000162571.9	1871	chr1	1114382	1114845	Promoter	ENSG00000205231.1	90
chr1	1111837	1112280	Intron (ENST00000379290.1/ENSG00000162571.9, intron 3 of 15)	ENSG00000162571.9	2551	chr1	1115030	1115343	Promoter	ENSG00000162571.9	0
chr1	1112926	1113337	Intron (ENST00000379290.1/ENSG00000162571.9, intron 3 of 15)	ENSG00000205231.1	1598	chr1	1116914	1117170	Promoter	ENSG00000162571.9	997
chr1	1115863	1116129	Promoter	ENSG00000162571.9	0	chr1	1117806	1118941	Exon (ENST00000379290.1/ENSG00000162571.9, exon 10 of 16)	ENSG00000162571.9	-1475
chr1	1117226	1118389	Exon (ENST00000379290.1/ENSG00000162571.9, exon 10 of 16)	ENSG00000162571.9	1309	chr1	1120378	1120740	Promoter	ENSG00000162571.9	0
chr1	1118616	1119335	Exon (ENST00000379290.1/ENSG00000162571.9, exon 12 of 16)	ENSG00000162571.9	-1081	chr1	1130712	1130927	Intron (ENST00000379290.1/ENSG00000162571.9, intron 13 of 15)	ENSG00000186891.9	10133
chr1	1123137	1123377	Intron (ENST00000379290.1/ENSG00000162571.9, intron 13 of 15)	ENSG00000162571.9	2721	chr1	1132018	1132472	3' UTR	ENSG00000186891.9	8588
chr1	1131616	1131886	3' UTR	ENSG00000186891.9	9174	chr1	1133766	1134128	Distal Intergenic	ENSG00000186891.9	6932
chr1	1132090	1132508	3' UTR	ENSG00000186891.9	8552	chr1	1134902	1135316	Distal Intergenic	ENSG00000186891.9	5744
chr1	1133568	1133879	Downstream (<=300bp)	ENSG00000186891.9	7181	chr1	1138193	1138538	Distal Intergenic	ENSG00000186891.9	2522
chr1	1134433	1135247	Distal Intergenic	ENSG00000186891.9	5813	chr1	1138768	1139010	3' UTR	ENSG00000186891.9	2050
chr1	1138634	1139154	3' UTR	ENSG00000186891.9	1906	chr1	1142543	1143017	Promoter	ENSG00000186891.9	-472
chr1	1140710	1141654	Promoter	ENSG00000186891.9	0	chr1	1146154	1147729	3' UTR	ENSG00000186827.6	1149
chr1	1142118	1142620	Promoter	ENSG00000186891.9	-47	chr1	1148735	1149136	Promoter	ENSG00000186827.6	0
chr1	1144451	1144831	Distal Intergenic	ENSG00000186891.9	-2380	chr1	1149362	1149785	Promoter	ENSG00000186827.6	0
chr1	1145654	1146220	Distal Intergenic	ENSG00000186827.6	2658	chr1	1150333	1151962	Promoter	ENSG00000186827.6	-815
chr1	1146645	1147711	3' UTR	ENSG00000186827.6	1167	chr1	1153888	1154189	3' UTR	ENSG00000078808.12	1484
chr1	1148066	1148306	Promoter	ENSG00000186827.6	572	chr1	1154660	1155294	Promoter	ENSG00000078808.12	379
chr1	1148792	1149063	Promoter	ENSG00000186827.6	0	chr1	1157316	1158263	Promoter	ENSG00000078808.12	-585
chr1	1149478	1149940	Promoter	ENSG00000186827.6	0	chr1	1158526	1158751	Exon (ENST00000360001.6/ENSG00000078808.12, exon 4 of 7)	ENSG00000078808.12	-1795
chr1	1150758	1151378	Distal Intergenic	ENSG00000186827.6	-1240	chr1	1160664	1161185	Intron (ENST00000360001.6/ENSG00000078808.12, intron 2 of 6)	ENSG00000078808.12	2791
chr1	1153265	1154166	3' UTR	ENSG00000078808.12	1507	chr1	1163431	1163839	Promoter	ENSG00000078808.12	137
chr1	1155631	1156041	Promoter	ENSG00000078808.12	0	chr1	1164607	1164958	Promoter	ENSG00000078808.12	-631
chr1	1159399	1159811	Intron (ENST00000360001.6/ENSG00000078808.12, intron 2 of 6)	ENSG00000078808.12	-2668	chr1	1170370	1171094	3' UTR	ENSG00000176022.3	2741
chr1	1160448	1161274	Intron (ENST00000360001.6/ENSG00000078808.12, intron 2 of 6)	ENSG00000078808.12	2702	chr1	1171567	1171923	Distal Intergenic	ENSG00000176022.3	3938
chr1	1161572	1162513	Intron (ENST00000360001.6/ENSG00000078808.12, intron 2 of 6)	ENSG00000078808.12	1463	chr1	1172486	1173401	Distal Intergenic	ENSG00000176022.3	4857
chr1	1162876	1163116	Promoter	ENSG00000078808.12	860	chr1	1173635	1174584	Distal Intergenic	ENSG00000184163.3	3954
chr1	1163872	1164526	Promoter	ENSG00000078808.12	0	chr1	1175093	1175675	Distal Intergenic	ENSG00000184163.3	2863
chr1	1170049	1170289	3' UTR	ENSG00000176022.3	2420	chr1	1177929	1178306	Promoter	ENSG00000184163.3	232
chr1	1170807	1172125	Distal Intergenic	ENSG00000176022.3	3178	chr1	1181473	1181767	Promoter	ENSG00000184163.3	335
chr1	1172347	1172955	Distal Intergenic	ENSG00000176022.3	4718	chr1	1183694	1184129	Distal Intergenic	ENSG00000184163.3	-1592
chr1	1174193	1174433	Distal Intergenic	ENSG00000184163.3	4105	chr1	1194312	1194847	Intron (ENST00000450390.2/ENSG00000160087.16, intron 4 of 7)	ENSG00000160087.16	-2597
chr1	1177456	1177846	Promoter	ENSG00000184163.3	692	chr1	1195707	1195949	Intron (ENST00000450390.2/ENSG00000160087.16, intron 4 of 7)	ENSG00000160087.16	3000
chr1	1178130	1178390	Promoter	ENSG00000184163.3	148	chr1	1216452	1216899	Promoter	ENSG00000162572.15	-406
chr1	1178836	1179123	Promoter	ENSG00000184163.3	0	chr1	1219715	1222710	Promoter	ENSG00000162572.15	0
chr1	1189249	1189605	3' UTR	ENSG00000160087.16	2110	chr1	1227815	1228080	3' UTR	ENSG00000131584.14	2308
chr1	1191145	1191398	Promoter	ENSG00000160087.16	317	chr1	1228292	1228795	3' UTR	ENSG00000131584.14	1593
chr1	1191594	1192148	Promoter	ENSG00000160087.16	0	chr1	1230166	1230425	Promoter	ENSG00000131584.14	0
chr1	1203124	1204118	5' UTR	ENSG00000160087.16	-1621	chr1	1231431	1232566	Exon (ENST00000354700.5/ENSG00000131584.14, exon 15 of 24)	ENSG00000131584.14	-1043
chr1	1210123	1210829	Promoter	ENSG00000230415.1	0	chr1	1233119	1234260	Promoter	ENSG00000131584.14	0
chr1	1215541	1215858	Promoter	ENSG00000162572.15	0	chr1	1239142	1239689	Promoter	ENSG00000131584.14	592
chr1	1217762	1218411	Promoter	ENSG00000162572.15	186	chr1	1242161	1242505	Promoter	ENSG00000131584.14	693
chr1	1218573	1218833	Promoter	ENSG00000162572.15	997	chr1	1248324	1248586	Promoter	ENSG00000127054.14	-244
chr1	1221068	1221687	Promoter	ENSG00000162572.15	-802	chr1	1249710	1250072	Promoter	ENSG00000127054.14	0
chr1	1226777	1227376	3' UTR	ENSG00000131584.14	3012	chr1	1255023	1255977	Promoter	ENSG00000127054.14	-297
chr1	1230088	1230739	Promoter	ENSG00000131584.14	0	chr1	1262339	1263325	3' UTR	ENSG00000224051.2	1718
chr1	1231483	1231723	Exon (ENST00000354700.5/ENSG00000131584.14, exon 16 of 24)	ENSG00000131584.14	-1095	chr1	1264219	1264722	3' UTR	ENSG00000169962.4	-1972
chr1	1231939	1232456	Exon (ENST00000354700.5/ENSG00000131584.14, exon 15 of 24)	ENSG00000131584.14	1165	chr1	1265764	1266189	Promoter	ENSG00000169962.4	-505
chr1	1234155	1234522	Promoter	ENSG00000131584.14	0	chr1	1266702	1267237	Promoter	ENSG00000169962.4	8
chr1	1236391	1236631	Intron (ENST00000354700.5/ENSG00000131584.14, intron 5 of 23)	ENSG00000131584.14	-1394	chr1	1268121	1268778	Exon (ENST00000339381.5/ENSG00000169962.4, exon 3 of 6)	ENSG00000169962.4	1427
chr1	1239345	1239728	Promoter	ENSG00000131584.14	553	chr1	1268939	1269254	Exon (ENST00000339381.5/ENSG00000169962.4, exon 6 of 6)	ENSG00000169962.4	2245
chr1	1248197	1249279	Promoter	ENSG00000127054.14	0	chr1	1269559	1269774	Exon (ENST00000339381.5/ENSG00000169962.4, exon 6 of 6)	ENSG00000169962.4	2865
chr1	1255836	1256770	Promoter	ENSG00000127054.14	0	chr1	1270156	1270467	3' UTR	ENSG00000169962.4	3462
chr1	1263378	1263906	3' UTR	ENSG00000224051.2	2757	chr1	1270911	1271463	3' UTR	ENSG00000169962.4	4217
chr1	1264062	1264709	3' UTR	ENSG00000169962.4	-1985	chr1	1272205	1272829	Intron (ENST00000378891.5/ENSG00000107404.13, intron 14 of 14)	ENSG00000169962.4	5511
chr1	1265082	1265485	Distal Intergenic	ENSG00000169962.4	-1209	chr1	1273829	1274463	Exon (ENST00000378891.5/ENSG00000107404.13, exon 12 of 15)	ENSG00000169962.4	7135
chr1	1266649	1267320	Promoter	ENSG00000169962.4	0	chr1	1274641	1275540	Exon (ENST00000378891.5/ENSG00000107404.13, exon 8 of 15)	ENSG00000169962.4	7947
chr1	1267596	1268326	Promoter	ENSG00000169962.4	902	chr1	1276841	1277084	Exon (ENST00000378891.5/ENSG00000107404.13, exon 5 of 15)	ENSG00000107404.13	7251
chr1	1269735	1270324	3' UTR	ENSG00000169962.4	3041	chr1	1278497	1278976	Intron (ENST00000378891.5/ENSG00000107404.13, intron 1 of 14)	ENSG00000107404.13	5359
chr1	1270575	1271546	3' UTR	ENSG00000169962.4	3881	chr1	1281195	1281458	Intron (ENST00000378891.5/ENSG00000107404.13, intron 1 of 14)	ENSG00000107404.13	2877
chr1	1272450	1273002	Intron (ENST00000378891.5/ENSG00000107404.13, intron 14 of 14)	ENSG00000169962.4	5756	chr1	1281717	1282398	Intron (ENST00000378891.5/ENSG00000107404.13, intron 1 of 14)	ENSG00000107404.13	1937
chr1	1274009	1274835	Exon (ENST00000378891.5/ENSG00000107404.13, exon 11 of 15)	ENSG00000169962.4	7315	chr1	1282707	1283000	Intron (ENST00000378891.5/ENSG00000107404.13, intron 1 of 14)	ENSG00000107404.13	1335
chr1	1275325	1275834	Exon (ENST00000378891.5/ENSG00000107404.13, exon 6 of 15)	ENSG00000107404.13	8501	chr1	1288658	1288967	Promoter	ENSG00000162576.12	660
chr1	1276202	1277137	Exon (ENST00000378891.5/ENSG00000107404.13, exon 5 of 15)	ENSG00000107404.13	7198	chr1	1292038	1292546	Exon (ENST00000309212.6/ENSG00000162576.12, exon 2 of 10)	ENSG00000162576.12	-1146
chr1	1277510	1278974	Exon (ENST00000378891.5/ENSG00000107404.13, exon 2 of 15)	ENSG00000107404.13	5361	chr1	1299708	1300096	Distal Intergenic	ENSG00000162576.12	-2551
chr1	1287040	1287361	Distal Intergenic	ENSG00000162576.12	2266	chr1	1305168	1305446	Distal Intergenic	ENSG00000175756.9	5078
chr1	1288106	1288690	Promoter	ENSG00000162576.12	937	chr1	1306209	1306532	Distal Intergenic	ENSG00000175756.9	3992
chr1	1300205	1300445	Distal Intergenic	ENSG00000162576.12	-3048	chr1	1308422	1308682	Distal Intergenic	ENSG00000175756.9	1842
chr1	1304743	1305109	Distal Intergenic	ENSG00000175756.9	5415	chr1	1313714	1313933	Promoter	ENSG00000223663.2	-113
chr1	1305299	1305539	Distal Intergenic	ENSG00000175756.9	4985	chr1	1316483	1316731	Distal Intergenic	ENSG00000223663.2	2437
chr1	1305725	1306087	Distal Intergenic	ENSG00000175756.9	4437	chr1	1320405	1320690	Distal Intergenic	ENSG00000221978.7	3403
chr1	1306839	1307100	Distal Intergenic	ENSG00000175756.9	3424	chr1	1321737	1321952	3' UTR	ENSG00000221978.7	2141
chr1	1309532	1309772	Promoter	ENSG00000175756.9	752	chr1	1350424	1350739	Distal Intergenic	ENSG00000235098.4	4794
chr1	1324989	1325347	Promoter	ENSG00000221978.7	-896	chr1	1356208	1356605	Promoter	ENSG00000235098.4	0
chr1	1348754	1349157	Distal Intergenic	ENSG00000272455.1	4278	chr1	1361068	1361283	Promoter	ENSG00000205116.3	-225
chr1	1354591	1355224	Promoter	ENSG00000235098.4	309	chr1	1361761	1362377	Promoter	ENSG00000205116.3	253
chr1	1361152	1361392	Promoter	ENSG00000205116.3	-116	chr1	1365738	1366137	Exon (ENST00000430109.1/ENSG00000225285.1, exon 2 of 2)	ENSG00000225285.1	1086
chr1	1365160	1365400	Distal Intergenic	ENSG00000225285.1	1823	chr1	1367033	1367555	Promoter	ENSG00000225285.1	0
chr1	1365942	1366679	Promoter	ENSG00000225285.1	544	chr1	1369093	1369308	Promoter	ENSG00000225285.1	560
chr1	1367058	1367452	Promoter	ENSG00000225285.1	0	chr1	1372559	1373498	5' UTR	ENSG00000179403.10	1444
chr1	1368885	1369317	Promoter	ENSG00000225285.1	551	chr1	1373801	1374447	Intron (ENST00000338660.5/ENSG00000179403.10, intron 2 of 2)	ENSG00000179403.10	2686
chr1	1369633	1370193	Promoter	ENSG00000225285.1	0	chr1	1377611	1377842	3' UTR	ENSG00000179403.10	6496
chr1	1372441	1372681	Exon (ENST00000495558.1/ENSG00000179403.10, exon 2 of 2)	ENSG00000179403.10	1326	chr1	1379554	1379930	Distal Intergenic	ENSG00000215915.5	-5139
chr1	1372833	1373073	5' UTR	ENSG00000179403.10	1718	chr1	1383560	1383978	Distal Intergenic	ENSG00000215915.5	-1091
chr1	1373325	1373928	Intron (ENST00000338660.5/ENSG00000179403.10, intron 2 of 2)	ENSG00000179403.10	2210	chr1	1385170	1385495	Promoter	ENSG00000215915.5	0
chr1	1374080	1374579	5' UTR	ENSG00000179403.10	2965	chr1	1386036	1386251	Promoter	ENSG00000215915.5	742
chr1	1379400	1379935	Distal Intergenic	ENSG00000215915.5	-5134	chr1	1388833	1389048	Intron (ENST00000378785.2/ENSG00000215915.5, intron 3 of 11)	ENSG00000215915.5	3539
chr1	1383253	1383493	Distal Intergenic	ENSG00000215915.5	-1576	chr1	1390949	1391344	Exon (ENST00000378785.2/ENSG00000215915.5, exon 6 of 12)	ENSG00000215915.5	5655
chr1	1386624	1387805	Exon (ENST00000378785.2/ENSG00000215915.5, exon 2 of 12)	ENSG00000215915.5	1330	chr1	1392561	1392776	Intron (ENST00000378785.2/ENSG00000215915.5, intron 8 of 11)	ENSG00000215915.5	-5087
chr1	1392277	1392694	Exon (ENST00000378785.2/ENSG00000215915.5, exon 8 of 12)	ENSG00000215915.5	-5169	chr1	1394533	1394748	Exon (ENST00000378785.2/ENSG00000215915.5, exon 9 of 12)	ENSG00000215915.5	-3115
chr1	1394216	1394802	Exon (ENST00000378785.2/ENSG00000215915.5, exon 9 of 12)	ENSG00000215915.5	-3061	chr1	1396274	1396605	Exon (ENST00000378785.2/ENSG00000215915.5, exon 10 of 12)	ENSG00000215915.5	-1258
chr1	1395286	1395909	Intron (ENST00000378785.2/ENSG00000215915.5, intron 9 of 11)	ENSG00000215915.5	-1954	chr1	1398381	1398615	Promoter	ENSG00000215915.5	518
chr1	1397492	1397732	Promoter	ENSG00000215915.5	-131	chr1	1399748	1399998	Intron (ENST00000378785.2/ENSG00000215915.5, intron 11 of 11)	ENSG00000215915.5	1885
chr1	1397996	1398469	Promoter	ENSG00000215915.5	133	chr1	1400277	1400583	Intron (ENST00000378785.2/ENSG00000215915.5, intron 11 of 11)	ENSG00000215915.5	2414
chr1	1401548	1401788	Intron (ENST00000378785.2/ENSG00000215915.5, intron 11 of 11)	ENSG00000215915.5	3685	chr1	1402424	1402668	Intron (ENST00000378785.2/ENSG00000215915.5, intron 11 of 11)	ENSG00000160072.15	-4475
chr1	1402764	1403063	Intron (ENST00000378785.2/ENSG00000215915.5, intron 11 of 11)	ENSG00000160072.15	-4080	chr1	1414523	1414765	Promoter	ENSG00000160072.15	94
chr1	1403245	1403994	3' UTR	ENSG00000160072.15	-3149	chr1	1415227	1415480	Promoter	ENSG00000160072.15	798
chr1	1410618	1411039	Intron (ENST00000378741.3/ENSG00000160072.15, intron 1 of 7)	ENSG00000160072.15	-2367	chr1	1417159	1417522	Exon (ENST00000378741.3/ENSG00000160072.15, exon 6 of 8)	ENSG00000160072.15	-1343
chr1	1412434	1412773	Promoter	ENSG00000160072.15	-633	chr1	1419113	1419471	Promoter	ENSG00000160072.15	248
chr1	1413390	1413694	Promoter	ENSG00000160072.15	0	chr1	1420408	1420763	Promoter	ENSG00000160072.15	459
chr1	1414629	1415224	Promoter	ENSG00000160072.15	200	chr1	1420919	1421155	Promoter	ENSG00000160072.15	970
chr1	1420424	1420752	Promoter	ENSG00000160072.15	475	chr1	1424280	1424499	Intron (ENST00000308647.7/ENSG00000160072.15, intron 12 of 15)	ENSG00000160072.15	4331
chr1	1422816	1423255	Exon (ENST00000308647.7/ENSG00000160072.15, exon 12 of 16)	ENSG00000160072.15	2867	chr1	1425390	1425698	Exon (ENST00000308647.7/ENSG00000160072.15, exon 14 of 16)	ENSG00000160072.15	5441
chr1	1423812	1424118	Intron (ENST00000308647.7/ENSG00000160072.15, intron 12 of 15)	ENSG00000160072.15	3863	chr1	1426492	1426809	Intron (ENST00000308647.7/ENSG00000160072.15, intron 15 of 15)	ENSG00000160072.15	6543
chr1	1425511	1425889	Exon (ENST00000308647.7/ENSG00000160072.15, exon 14 of 16)	ENSG00000160072.15	5562	chr1	1430235	1430466	Intron (ENST00000308647.7/ENSG00000160072.15, intron 15 of 15)	ENSG00000160072.15	10286
chr1	1427115	1427586	Intron (ENST00000308647.7/ENSG00000160072.15, intron 15 of 15)	ENSG00000160072.15	7166	chr1	1430918	1431528	3' UTR	ENSG00000160072.15	10969
chr1	1429460	1430026	Intron (ENST00000308647.7/ENSG00000160072.15, intron 15 of 15)	ENSG00000160072.15	9511	chr1	1434921	1435384	Distal Intergenic	ENSG00000197785.9	-12147
chr1	1430249	1431074	Exon (ENST00000308647.7/ENSG00000160072.15, exon 16 of 16)	ENSG00000160072.15	10300	chr1	1443782	1444096	Distal Intergenic	ENSG00000197785.9	-3435
chr1	1438523	1438889	Distal Intergenic	ENSG00000197785.9	-8642	chr1	1452323	1452538	Promoter	ENSG00000197785.9	0
chr1	1442753	1443136	Distal Intergenic	ENSG00000197785.9	-4395	chr1	1453323	1453903	Promoter	ENSG00000197785.9	322
chr1	1455352	1456511	Exon (ENST00000378756.3/ENSG00000197785.9, exon 6 of 16)	ENSG00000197785.9	2351	chr1	1455263	1455551	Exon (ENST00000378756.3/ENSG00000197785.9, exon 6 of 16)	ENSG00000197785.9	2262
chr1	1458589	1458846	Promoter	ENSG00000197785.9	-807	chr1	1458544	1459216	Promoter	ENSG00000197785.9	-437
chr1	1460886	1461281	Intron (ENST00000378756.3/ENSG00000197785.9, intron 12 of 15)	ENSG00000197785.9	1233	chr1	1460465	1460766	Promoter	ENSG00000197785.9	812
chr1	1468489	1468873	Intron (ENST00000378756.3/ENSG00000197785.9, intron 15 of 15)	ENSG00000205090.4	6864	chr1	1464050	1465318	Exon (ENST00000378756.3/ENSG00000197785.9, exon 15 of 16)	ENSG00000197785.9	4397
chr1	1469375	1469783	3' UTR	ENSG00000205090.4	5954	chr1	1468283	1468575	Intron (ENST00000378756.3/ENSG00000197785.9, intron 15 of 15)	ENSG00000205090.4	7162
chr1	1471650	1472047	Intron (ENST00000378733.4/ENSG00000205090.4, intron 2 of 3)	ENSG00000205090.4	3690	chr1	1468827	1469236	Intron (ENST00000378756.3/ENSG00000197785.9, intron 15 of 15)	ENSG00000205090.4	6501
chr1	1472395	1472767	Intron (ENST00000378733.4/ENSG00000205090.4, intron 2 of 3)	ENSG00000205090.4	2970	chr1	1471695	1472382	Intron (ENST00000378733.4/ENSG00000205090.4, intron 2 of 3)	ENSG00000205090.4	3355
chr1	1478568	1478813	Intron (ENST00000291386.3/ENSG00000160075.10, intron 4 of 4)	ENSG00000205090.4	-2735	chr1	1473850	1474383	Intron (ENST00000378733.4/ENSG00000205090.4, intron 2 of 3)	ENSG00000205090.4	1354
chr1	1497162	1497617	Intron (ENST00000291386.3/ENSG00000160075.10, intron 2 of 4)	ENSG00000215791.2	2287	chr1	1477903	1478360	Intron (ENST00000291386.3/ENSG00000160075.10, intron 4 of 4)	ENSG00000205090.4	-2070
chr1	1497953	1498311	3' UTR	ENSG00000215791.2	1593	chr1	1479929	1480615	Exon (ENST00000291386.3/ENSG00000160075.10, exon 3 of 5)	ENSG00000160075.10	1252
chr1	1499674	1500030	Promoter	ENSG00000215791.2	0	chr1	1483688	1484273	Intron (ENST00000291386.3/ENSG00000160075.10, intron 2 of 4)	ENSG00000160075.10	-1821
chr1	1504092	1504423	Intron (ENST00000291386.3/ENSG00000160075.10, intron 1 of 4)	ENSG00000215791.2	-4188	chr1	1486965	1487463	Intron (ENST00000291386.3/ENSG00000160075.10, intron 2 of 4)	ENSG00000160075.10	-5098
chr1	1512989	1513229	Distal Intergenic	ENSG00000236684.1	-1907	chr1	1490408	1490741	Intron (ENST00000291386.3/ENSG00000160075.10, intron 2 of 4)	ENSG00000160075.10	-8541
chr1	1527209	1527475	Distal Intergenic	ENSG00000228594.1	8001	chr1	1495542	1495808	Intron (ENST00000291386.3/ENSG00000160075.10, intron 2 of 4)	ENSG00000215791.2	4096
chr1	1531816	1532056	Distal Intergenic	ENSG00000228594.1	3420	chr1	1496353	1496568	Intron (ENST00000291386.3/ENSG00000160075.10, intron 2 of 4)	ENSG00000215791.2	3336
chr1	1536781	1537212	Distal Intergenic	ENSG00000228594.1	-1305	chr1	1497843	1498058	3' UTR	ENSG00000215791.2	1846
chr1	1538484	1539503	Distal Intergenic	ENSG00000228594.1	-3008	chr1	1512867	1513176	Distal Intergenic	ENSG00000236684.1	-1960
chr1	1542839	1543079	Distal Intergenic	ENSG00000228594.1	-7363	chr1	1513636	1513888	Distal Intergenic	ENSG00000236684.1	-1248
chr1	1554109	1555044	Exon (ENST00000477990.1/ENSG00000197530.8, exon 2 of 2)	ENSG00000197530.8	1152	chr1	1519181	1519400	Distal Intergenic	ENSG00000236684.1	4045
chr1	1555927	1556167	Intron (ENST00000520777.1/ENSG00000197530.8, intron 2 of 19)	ENSG00000197530.8	-2335	chr1	1527103	1527396	Distal Intergenic	ENSG00000228594.1	8080
chr1	1556778	1557248	Intron (ENST00000520777.1/ENSG00000197530.8, intron 2 of 19)	ENSG00000197530.8	-1254	chr1	1529445	1530179	Distal Intergenic	ENSG00000228594.1	5297
chr1	1557485	1558253	Promoter	ENSG00000197530.8	-249	chr1	1533707	1533959	3' UTR	ENSG00000228594.1	1517
chr1	1559207	1560770	Promoter	ENSG00000197530.8	0	chr1	1539175	1539501	Distal Intergenic	ENSG00000228594.1	-3699
chr1	1561799	1562569	Promoter	ENSG00000197530.8	0	chr1	1540056	1540313	Distal Intergenic	ENSG00000228594.1	-4580
chr1	1563934	1564308	Promoter	ENSG00000197530.8	65	chr1	1545206	1545559	Distal Intergenic	ENSG00000197530.8	-5236
chr1	1566917	1567513	Promoter	ENSG00000189409.8	0	chr1	1545724	1545939	Distal Intergenic	ENSG00000197530.8	-4856
chr1	1572109	1572534	Exon (ENST00000513088.2/ENSG00000248333.3, exon 10 of 15)	ENSG00000189409.8	2490	chr1	1553372	1553982	Promoter	ENSG00000197530.8	415
chr1	1572951	1573277	Exon (ENST00000513088.2/ENSG00000248333.3, exon 8 of 15)	ENSG00000189409.8	3332	chr1	1554915	1555459	Intron (ENST00000520777.1/ENSG00000197530.8, intron 2 of 19)	ENSG00000197530.8	1958
chr1	1582619	1583010	Intron (ENST00000341832.6/ENSG00000248333.3, intron 2 of 19)	ENSG00000248333.3	-1996	chr1	1555627	1556928	Intron (ENST00000520777.1/ENSG00000197530.8, intron 2 of 19)	ENSG00000197530.8	-1574
chr1	1586252	1586515	Intron (ENST00000341832.6/ENSG00000248333.3, intron 2 of 19)	ENSG00000248333.3	2199	chr1	1557451	1557989	Promoter	ENSG00000197530.8	-513
chr1	1597481	1597859	Intron (ENST00000378662.1/ENSG00000189339.7, intron 9 of 9)	ENSG00000189339.7	3719	chr1	1558277	1558725	Promoter	ENSG00000197530.8	0
chr1	1606219	1606601	Intron (ENST00000378662.1/ENSG00000189339.7, intron 5 of 9)	ENSG00000269227.1	1505	chr1	1559266	1560163	Promoter	ENSG00000197530.8	0
chr1	1609184	1610053	Intron (ENST00000378662.1/ENSG00000189339.7, intron 2 of 9)	ENSG00000269227.1	4470	chr1	1560604	1560976	Promoter	ENSG00000197530.8	0
chr1	1610887	1611296	Intron (ENST00000378662.1/ENSG00000189339.7, intron 2 of 9)	ENSG00000269227.1	6173	chr1	1562013	1562553	Promoter	ENSG00000197530.8	0
chr1	1611714	1611954	Intron (ENST00000378662.1/ENSG00000189339.7, intron 2 of 9)	ENSG00000269227.1	7000	chr1	1563098	1564362	Promoter	ENSG00000197530.8	0
chr1	1627952	1628703	Distal Intergenic	ENSG00000215914.3	-2666	chr1	1566898	1567349	Promoter	ENSG00000189409.8	-125
chr1	1635837	1636312	Promoter	ENSG00000008128.18	0	chr1	1572698	1573051	Exon (ENST00000513088.2/ENSG00000248333.3, exon 9 of 15)	ENSG00000189409.8	3079
chr1	1637792	1638336	Promoter	ENSG00000008128.18	664	chr1	1583068	1583283	Intron (ENST00000341832.6/ENSG00000248333.3, intron 2 of 19)	ENSG00000248333.3	-2445
chr1	1646839	1647079	Intron (ENST00000356200.3/ENSG00000008128.18, intron 4 of 18)	ENSG00000008128.18	6015	chr1	1597208	1597658	3' UTR	ENSG00000189339.7	3920
chr1	1662321	1662823	Exon (ENST00000417099.1/ENSG00000227775.3, exon 2 of 2)	ENSG00000227775.3	-1170	chr1	1601942	1602211	Promoter	ENSG00000189339.7	-364
chr1	1666287	1666605	Promoter	ENSG00000215790.2	108	chr1	1609572	1609863	Intron (ENST00000378662.1/ENSG00000189339.7, intron 2 of 9)	ENSG00000269227.1	4858
chr1	1680344	1680928	Distal Intergenic	ENSG00000215790.2	-2913	chr1	1610315	1611044	Intron (ENST00000378662.1/ENSG00000189339.7, intron 2 of 9)	ENSG00000269227.1	5601
chr1	1681493	1681794	Distal Intergenic	ENSG00000008130.11	4028	chr1	1611777	1612109	Intron (ENST00000378662.1/ENSG00000189339.7, intron 2 of 9)	ENSG00000269227.1	7063
chr1	1687478	1687809	Promoter	ENSG00000008130.11	0	chr1	1615589	1615804	Intron (ENST00000378662.1/ENSG00000189339.7, intron 2 of 9)	ENSG00000189339.7	8279
chr1	1688961	1690283	Promoter	ENSG00000008130.11	0	chr1	1627847	1628113	Distal Intergenic	ENSG00000215914.3	-3256
chr1	1690574	1691434	Promoter	ENSG00000008130.11	-493	chr1	1635604	1636300	Promoter	ENSG00000008128.18	0
chr1	1692925	1693527	Exon (ENST00000341426.5/ENSG00000008130.11, exon 3 of 12)	ENSG00000008130.11	-2844	chr1	1657563	1657900	Intron (ENST00000577672.1/ENSG00000227775.3, intron 1 of 1)	ENSG00000227775.3	1509
chr1	1696400	1696668	Exon (ENST00000341426.5/ENSG00000008130.11, exon 2 of 12)	ENSG00000008130.11	-6319	chr1	1684121	1684336	3' UTR	ENSG00000008130.11	1486
chr1	1706945	1707185	Intron (ENST00000341426.5/ENSG00000008130.11, intron 1 of 11)	ENSG00000008130.11	2673	chr1	1684901	1685309	Promoter	ENSG00000008130.11	513
chr1	1712372	1712833	Promoter	ENSG00000008130.11	-476	chr1	1686680	1687135	Promoter	ENSG00000008130.11	-345
chr1	1713741	1714243	Distal Intergenic	ENSG00000008130.11	-1845	chr1	1687311	1687579	Promoter	ENSG00000008130.11	187
chr1	1715150	1715593	Distal Intergenic	ENSG00000008130.11	-3254	chr1	1687868	1688403	Promoter	ENSG00000008130.11	0
chr1	1721923	1722293	Exon (ENST00000378609.4/ENSG00000078369.13, exon 9 of 12)	ENSG00000078369.13	3343	chr1	1690085	1690343	Promoter	ENSG00000008130.11	-4
chr1	1724781	1725021	Promoter	ENSG00000078369.13	615	chr1	1691154	1692026	Exon (ENST00000378625.1/ENSG00000008130.11, exon 4 of 14)	ENSG00000008130.11	-1073
chr1	1729176	1729600	Intron (ENST00000378609.4/ENSG00000078369.13, intron 7 of 11)	ENSG00000078369.13	-3540	chr1	1713936	1714151	Distal Intergenic	ENSG00000008130.11	-2040
chr1	1730546	1730850	Intron (ENST00000378609.4/ENSG00000078369.13, intron 7 of 11)	ENSG00000078369.13	-4910	chr1	1744708	1744923	Intron (ENST00000378609.4/ENSG00000078369.13, intron 5 of 11)	ENSG00000078369.13	4902
chr1	1749398	1749672	Promoter	ENSG00000078369.13	153	chr1	1794120	1794335	Intron (ENST00000378609.4/ENSG00000078369.13, intron 1 of 11)	ENSG00000078369.13	27505
chr1	1756052	1756292	Promoter	ENSG00000078369.13	701	chr1	1803997	1804212	Intron (ENST00000378609.4/ENSG00000078369.13, intron 1 of 11)	ENSG00000078369.13	17628
chr1	1766087	1766343	Intron (ENST00000378609.4/ENSG00000078369.13, intron 2 of 11)	ENSG00000078369.13	-2363	chr1	1827137	1827625	Distal Intergenic	ENSG00000231050.1	4227
chr1	1769615	1769926	Intron (ENST00000378609.4/ENSG00000078369.13, intron 2 of 11)	ENSG00000078369.13	-5891	chr1	1829695	1830560	Distal Intergenic	ENSG00000231050.1	6785
chr1	1804933	1805267	Intron (ENST00000378609.4/ENSG00000078369.13, intron 1 of 11)	ENSG00000078369.13	16573	chr1	1846479	1847371	Promoter	ENSG00000169885.5	0
chr1	1825235	1825855	Distal Intergenic	ENSG00000231050.1	2325	chr1	1847625	1848143	Promoter	ENSG00000169885.5	777
chr1	1826232	1826665	Distal Intergenic	ENSG00000231050.1	3322	chr1	1852218	1852605	Distal Intergenic	ENSG00000178821.8	-1506
chr1	1826872	1827121	Distal Intergenic	ENSG00000231050.1	3962	chr1	1852939	1853474	Exon (ENST00000464311.1/ENSG00000142609.13, exon 10 of 10)	ENSG00000178821.8	-2227
chr1	1829985	1830448	Distal Intergenic	ENSG00000231050.1	7075	chr1	1853768	1855178	Exon (ENST00000464311.1/ENSG00000142609.13, exon 7 of 10)	ENSG00000178821.8	-3056
chr1	1834415	1834655	Distal Intergenic	ENSG00000231050.1	11505	chr1	1855893	1856605	Exon (ENST00000464311.1/ENSG00000142609.13, exon 5 of 10)	ENSG00000142609.13	2237
chr1	1834983	1835242	Distal Intergenic	ENSG00000169885.5	-11024	chr1	1856961	1858049	Promoter	ENSG00000142609.13	793
chr1	1847024	1847333	Promoter	ENSG00000169885.5	176	chr1	1859076	1859317	Promoter	ENSG00000142609.13	51
chr1	1847525	1848004	Promoter	ENSG00000169885.5	677	chr1	1859659	1859917	Promoter	ENSG00000142609.13	-291
chr1	1848324	1848730	3' UTR	ENSG00000169885.5	1476	chr1	1861143	1861571	Exon (ENST00000493964.1/ENSG00000142609.13, exon 9 of 21)	ENSG00000142609.13	-1775
chr1	1848975	1849430	Promoter	ENSG00000178821.8	806	chr1	1867787	1868203	Intron (ENST00000493964.1/ENSG00000142609.13, intron 8 of 20)	ENSG00000142609.13	-8419
chr1	1851507	1851998	Promoter	ENSG00000178821.8	-795	chr1	1868819	1869131	Intron (ENST00000493964.1/ENSG00000142609.13, intron 8 of 20)	ENSG00000142609.13	-9451
chr1	1854140	1855092	Exon (ENST00000464311.1/ENSG00000142609.13, exon 7 of 10)	ENSG00000178821.8	-3428	chr1	1870342	1870753	Exon (ENST00000493964.1/ENSG00000142609.13, exon 8 of 21)	ENSG00000142609.13	-10974
chr1	1856146	1856390	Intron (ENST00000464311.1/ENSG00000142609.13, intron 4 of 9)	ENSG00000142609.13	2452	chr1	1870907	1871421	Exon (ENST00000493964.1/ENSG00000142609.13, exon 7 of 21)	ENSG00000142609.13	-11539
chr1	1856668	1857325	Exon (ENST00000464311.1/ENSG00000142609.13, exon 4 of 10)	ENSG00000142609.13	1517	chr1	1872171	1873350	Intron (ENST00000493964.1/ENSG00000142609.13, intron 5 of 20)	ENSG00000142609.13	-12803
chr1	1857496	1857765	Exon (ENST00000464311.1/ENSG00000142609.13, exon 3 of 10)	ENSG00000142609.13	1077	chr1	1873537	1875181	Exon (ENST00000493964.1/ENSG00000142609.13, exon 5 of 21)	ENSG00000142609.13	11973
chr1	1858592	1858864	Promoter	ENSG00000142609.13	0	chr1	1876820	1877431	Intron (ENST00000493964.1/ENSG00000142609.13, intron 3 of 20)	ENSG00000142609.13	9723
chr1	1859708	1860632	Promoter	ENSG00000142609.13	-340	chr1	1878631	1878846	Intron (ENST00000493964.1/ENSG00000142609.13, intron 1 of 20)	ENSG00000142609.13	8308
chr1	1864116	1864467	Intron (ENST00000493964.1/ENSG00000142609.13, intron 8 of 20)	ENSG00000142609.13	-4748	chr1	1880962	1881282	Intron (ENST00000493964.1/ENSG00000142609.13, intron 1 of 20)	ENSG00000142609.13	5872
chr1	1870129	1871075	Exon (ENST00000493964.1/ENSG00000142609.13, exon 7 of 21)	ENSG00000142609.13	-10761	chr1	1886727	1887035	Promoter	ENSG00000142609.13	119
chr1	1871701	1872063	Exon (ENST00000493964.1/ENSG00000142609.13, exon 6 of 21)	ENSG00000142609.13	-12333	chr1	1887528	1887743	Promoter	ENSG00000142609.13	-374
chr1	1872597	1872995	Intron (ENST00000493964.1/ENSG00000142609.13, intron 5 of 20)	ENSG00000142609.13	-13229	chr1	1888335	1889908	Intron (ENST00000493316.1/ENSG00000142609.13, intron 2 of 4)	ENSG00000142609.13	-1181
chr1	1873422	1875209	Exon (ENST00000493964.1/ENSG00000142609.13, exon 5 of 21)	ENSG00000142609.13	11945	chr1	1895205	1895473	Exon (ENST00000270720.7/ENSG00000142609.13, exon 14 of 18)	ENSG00000142609.13	2492
chr1	1877309	1877734	Intron (ENST00000493964.1/ENSG00000142609.13, intron 3 of 20)	ENSG00000142609.13	9420	chr1	1895738	1896041	Intron (ENST00000270720.7/ENSG00000142609.13, intron 13 of 17)	ENSG00000142609.13	1924
chr1	1878386	1879166	Exon (ENST00000493964.1/ENSG00000142609.13, exon 2 of 21)	ENSG00000142609.13	7988	chr1	1896311	1896701	Exon (ENST00000270720.7/ENSG00000142609.13, exon 13 of 18)	ENSG00000142609.13	1264
chr1	1879362	1879769	Intron (ENST00000493964.1/ENSG00000142609.13, intron 1 of 20)	ENSG00000142609.13	7385	chr1	1898851	1899275	Promoter	ENSG00000142609.13	-886
chr1	1887714	1888321	Promoter	ENSG00000142609.13	-560	chr1	1899687	1899902	Intron (ENST00000270720.7/ENSG00000142609.13, intron 11 of 17)	ENSG00000142609.13	-1722
chr1	1888862	1889987	Intron (ENST00000493316.1/ENSG00000142609.13, intron 2 of 4)	ENSG00000142609.13	1558	chr1	1902065	1902923	Exon (ENST00000270720.7/ENSG00000142609.13, exon 10 of 18)	ENSG00000142609.13	-4100
chr1	1890276	1890831	Promoter	ENSG00000142609.13	714	chr1	1904409	1904759	Exon (ENST00000270720.7/ENSG00000142609.13, exon 8 of 18)	ENSG00000142609.13	-6444
chr1	1892685	1892946	Intron (ENST00000270720.7/ENSG00000142609.13, intron 14 of 17)	ENSG00000142609.13	-1138	chr1	1905669	1906445	Intron (ENST00000270720.7/ENSG00000142609.13, intron 6 of 17)	ENSG00000142609.13	-7704
chr1	1896297	1896876	Exon (ENST00000270720.7/ENSG00000142609.13, exon 13 of 18)	ENSG00000142609.13	1089	chr1	1907057	1907437	Intron (ENST00000270720.7/ENSG00000142609.13, intron 6 of 17)	ENSG00000142609.13	-9092
chr1	1897109	1897875	Promoter	ENSG00000142609.13	90	chr1	1907806	1908149	Intron (ENST00000270720.7/ENSG00000142609.13, intron 6 of 17)	ENSG00000142609.13	-9841
chr1	1898303	1898686	Promoter	ENSG00000142609.13	-338	chr1	1908931	1909168	Intron (ENST00000270720.7/ENSG00000142609.13, intron 6 of 17)	ENSG00000142609.13	-10966
chr1	1899431	1900296	Exon (ENST00000270720.7/ENSG00000142609.13, exon 11 of 18)	ENSG00000142609.13	-1466	chr1	1909922	1910318	Intron (ENST00000270720.7/ENSG00000142609.13, intron 6 of 17)	ENSG00000142609.13	-11957
chr1	1902112	1902352	Exon (ENST00000270720.7/ENSG00000142609.13, exon 10 of 18)	ENSG00000142609.13	-4147	chr1	1912070	1912692	Intron (ENST00000270720.7/ENSG00000142609.13, intron 6 of 17)	ENSG00000142609.13	9676
chr1	1902559	1903496	Exon (ENST00000270720.7/ENSG00000142609.13, exon 9 of 18)	ENSG00000142609.13	-4594	chr1	1913579	1913805	Intron (ENST00000270720.7/ENSG00000142609.13, intron 6 of 17)	ENSG00000142609.13	8563
chr1	1904587	1905101	Intron (ENST00000270720.7/ENSG00000142609.13, intron 7 of 17)	ENSG00000142609.13	-6622	chr1	1913975	1914190	Intron (ENST00000270720.7/ENSG00000142609.13, intron 6 of 17)	ENSG00000142609.13	8178
chr1	1905419	1906579	Exon (ENST00000270720.7/ENSG00000142609.13, exon 7 of 18)	ENSG00000142609.13	-7454	chr1	1915584	1915926	Exon (ENST00000378592.1/ENSG00000142609.13, exon 7 of 7)	ENSG00000142609.13	6442
chr1	1907674	1908608	Intron (ENST00000270720.7/ENSG00000142609.13, intron 6 of 17)	ENSG00000142609.13	-9709	chr1	1916529	1917554	Exon (ENST00000270720.7/ENSG00000142609.13, exon 6 of 18)	ENSG00000142609.13	4814
chr1	1909862	1910283	Intron (ENST00000270720.7/ENSG00000142609.13, intron 6 of 17)	ENSG00000142609.13	-11897	chr1	1918117	1918870	Exon (ENST00000270720.7/ENSG00000142609.13, exon 5 of 18)	ENSG00000142609.13	3498
chr1	1912248	1912488	Intron (ENST00000270720.7/ENSG00000142609.13, intron 6 of 17)	ENSG00000142609.13	9880	chr1	1931669	1932094	Intron (ENST00000270720.7/ENSG00000142609.13, intron 1 of 17)	ENSG00000142609.13	3059
chr1	1913460	1914051	Intron (ENST00000270720.7/ENSG00000142609.13, intron 6 of 17)	ENSG00000142609.13	8317	chr1	1932378	1933005	Intron (ENST00000270720.7/ENSG00000142609.13, intron 1 of 17)	ENSG00000142609.13	2148
chr1	1916864	1918105	Exon (ENST00000270720.7/ENSG00000142609.13, exon 6 of 18)	ENSG00000142609.13	4263	chr1	1939492	1939741	Distal Intergenic	ENSG00000142609.13	-4216
chr1	1920856	1921406	Promoter	ENSG00000142609.13	962	chr1	1941402	1941805	Distal Intergenic	ENSG00000233542.1	5164
chr1	1931054	1931534	Intron (ENST00000270720.7/ENSG00000142609.13, intron 1 of 17)	ENSG00000142609.13	3619	chr1	1945504	1945847	Exon (ENST00000443930.1/ENSG00000233542.1, exon 2 of 2)	ENSG00000233542.1	1122
chr1	1932623	1933454	Intron (ENST00000270720.7/ENSG00000142609.13, intron 1 of 17)	ENSG00000142609.13	1699	chr1	1947681	1948129	Promoter	ENSG00000233542.1	-712
chr1	1936637	1936984	Distal Intergenic	ENSG00000142609.13	-1361	chr1	1948753	1949478	Distal Intergenic	ENSG00000187730.6	-1302
chr1	1941118	1941983	Distal Intergenic	ENSG00000233542.1	4986	chr1	1951666	1953017	Promoter	ENSG00000187730.6	886
chr1	1942601	1943251	Distal Intergenic	ENSG00000233542.1	3718	chr1	1953427	1953987	Intron (ENST00000378585.4/ENSG00000187730.6, intron 1 of 8)	ENSG00000187730.6	2647
chr1	1946798	1947215	Promoter	ENSG00000233542.1	0	chr1	1954306	1954568	Intron (ENST00000378585.4/ENSG00000187730.6, intron 1 of 8)	ENSG00000187730.6	3526
chr1	1949433	1949673	Distal Intergenic	ENSG00000187730.6	-1107	chr1	1955343	1955911	Intron (ENST00000378585.4/ENSG00000187730.6, intron 1 of 8)	ENSG00000187730.6	4563
chr1	1951437	1951823	Promoter	ENSG00000187730.6	657	chr1	1956192	1956481	Exon (ENST00000378585.4/ENSG00000187730.6, exon 2 of 9)	ENSG00000187730.6	5412
chr1	1952683	1952923	Intron (ENST00000378585.4/ENSG00000187730.6, intron 1 of 8)	ENSG00000187730.6	1903	chr1	1956833	1958333	Exon (ENST00000378585.4/ENSG00000187730.6, exon 3 of 9)	ENSG00000187730.6	6053
chr1	1953811	1954345	Intron (ENST00000378585.4/ENSG00000187730.6, intron 1 of 8)	ENSG00000187730.6	3031	chr1	1959308	1959544	Intron (ENST00000378585.4/ENSG00000187730.6, intron 5 of 8)	ENSG00000187730.6	8528
chr1	1954641	1954896	Intron (ENST00000378585.4/ENSG00000187730.6, intron 1 of 8)	ENSG00000187730.6	3861	chr1	1960186	1960544	Intron (ENST00000378585.4/ENSG00000187730.6, intron 6 of 8)	ENSG00000187730.6	9406
chr1	1955148	1957272	Exon (ENST00000378585.4/ENSG00000187730.6, exon 2 of 9)	ENSG00000187730.6	4368	chr1	1961236	1961668	Exon (ENST00000378585.4/ENSG00000187730.6, exon 9 of 9)	ENSG00000187730.6	10456
chr1	1958489	1959595	Exon (ENST00000378585.4/ENSG00000187730.6, exon 5 of 9)	ENSG00000187730.6	7709	chr1	1961850	1962477	3' UTR	ENSG00000187730.6	11070
chr1	1960137	1961502	Exon (ENST00000378585.4/ENSG00000187730.6, exon 7 of 9)	ENSG00000187730.6	9357	chr1	1962980	1963516	Distal Intergenic	ENSG00000187730.6	12200
chr1	1961652	1962304	3' UTR	ENSG00000187730.6	10872	chr1	1964777	1965435	Distal Intergenic	ENSG00000187730.6	13997
chr1	1962689	1963404	Distal Intergenic	ENSG00000187730.6	11909	chr1	1965773	1966153	Distal Intergenic	ENSG00000226969.1	14937
chr1	1963783	1964141	Distal Intergenic	ENSG00000187730.6	13003	chr1	1966500	1966917	Distal Intergenic	ENSG00000226969.1	14173
chr1	1965091	1965506	Distal Intergenic	ENSG00000187730.6	14311	chr1	1967090	1967770	Distal Intergenic	ENSG00000226969.1	13320
chr1	1965716	1966360	Distal Intergenic	ENSG00000226969.1	14730	chr1	1968385	1969109	Distal Intergenic	ENSG00000226969.1	11981
chr1	1967026	1967298	Distal Intergenic	ENSG00000226969.1	13792	chr1	1971681	1972219	Distal Intergenic	ENSG00000226969.1	8871
chr1	1968731	1969223	Distal Intergenic	ENSG00000226969.1	11867	chr1	1972739	1974031	Distal Intergenic	ENSG00000226969.1	7059
chr1	1970344	1971036	Distal Intergenic	ENSG00000226969.1	10054	chr1	1978548	1978763	Distal Intergenic	ENSG00000226969.1	2327
chr1	1972502	1973727	Distal Intergenic	ENSG00000226969.1	7363	chr1	1979086	1979730	Distal Intergenic	ENSG00000226969.1	1360
chr1	1974088	1974501	Distal Intergenic	ENSG00000226969.1	6589	chr1	1983004	1983280	Promoter	ENSG00000067606.11	757
chr1	1974691	1975626	Distal Intergenic	ENSG00000226969.1	5464	chr1	1984138	1984574	Intron (ENST00000378567.3/ENSG00000067606.11, intron 1 of 17)	ENSG00000067606.11	1891
chr1	1977992	1978445	Distal Intergenic	ENSG00000226969.1	2645	chr1	1985221	1985578	Intron (ENST00000378567.3/ENSG00000067606.11, intron 1 of 17)	ENSG00000067606.11	-1302
chr1	1978744	1979120	Distal Intergenic	ENSG00000226969.1	1970	chr1	1985728	1986151	Promoter	ENSG00000067606.11	-729
chr1	1979316	1980343	Promoter	ENSG00000226969.1	747	chr1	1986775	1987491	Promoter	ENSG00000067606.11	0
chr1	1983202	1983442	Promoter	ENSG00000067606.11	955	chr1	1987798	1988013	Promoter	ENSG00000067606.11	680
chr1	1983627	1983894	Intron (ENST00000378567.3/ENSG00000067606.11, intron 1 of 17)	ENSG00000067606.11	1380	chr1	1992081	1992831	Intron (ENST00000378567.3/ENSG00000067606.11, intron 4 of 17)	ENSG00000067606.11	4963
chr1	1987079	1987319	Promoter	ENSG00000067606.11	0	chr1	1993458	1993882	Intron (ENST00000378567.3/ENSG00000067606.11, intron 4 of 17)	ENSG00000067606.11	6340
chr1	1988876	1989322	Intron (ENST00000378567.3/ENSG00000067606.11, intron 3 of 17)	ENSG00000067606.11	1758	chr1	1998649	1998864	Intron (ENST00000378567.3/ENSG00000067606.11, intron 4 of 17)	ENSG00000067606.11	-6037
chr1	1991288	1991855	Intron (ENST00000378567.3/ENSG00000067606.11, intron 4 of 17)	ENSG00000067606.11	4170	chr1	1999451	2000314	Intron (ENST00000378567.3/ENSG00000067606.11, intron 4 of 17)	ENSG00000067606.11	-4587
chr1	1992081	1993260	Intron (ENST00000378567.3/ENSG00000067606.11, intron 4 of 17)	ENSG00000067606.11	4963	chr1	2000740	2001063	Intron (ENST00000378567.3/ENSG00000067606.11, intron 4 of 17)	ENSG00000067606.11	-3838
chr1	1999879	2001108	Intron (ENST00000378567.3/ENSG00000067606.11, intron 4 of 17)	ENSG00000067606.11	-3793	chr1	2001231	2001790	Intron (ENST00000378567.3/ENSG00000067606.11, intron 4 of 17)	ENSG00000067606.11	-3111
chr1	2002628	2002976	Exon (ENST00000479566.1/ENSG00000067606.11, exon 4 of 4)	ENSG00000067606.11	-1925	chr1	2002220	2003085	Exon (ENST00000479566.1/ENSG00000067606.11, exon 4 of 4)	ENSG00000067606.11	-1816
chr1	2003488	2004093	Promoter	ENSG00000067606.11	-808	chr1	2006182	2006776	Promoter	ENSG00000067606.11	0
chr1	2006784	2007389	Promoter	ENSG00000067606.11	101	chr1	2007259	2008112	Promoter	ENSG00000067606.11	576
chr1	2008255	2008688	Intron (ENST00000378567.3/ENSG00000067606.11, intron 4 of 17)	ENSG00000067606.11	1572	chr1	2008959	2009253	Intron (ENST00000378567.3/ENSG00000067606.11, intron 4 of 17)	ENSG00000067606.11	2276
chr1	2015048	2015787	Intron (ENST00000378567.3/ENSG00000067606.11, intron 4 of 17)	ENSG00000067606.11	1361	chr1	2011937	2013074	Promoter	ENSG00000067606.11	-613
chr1	2016179	2016851	Intron (ENST00000378567.3/ENSG00000067606.11, intron 4 of 17)	ENSG00000067606.11	2492	chr1	2013976	2014879	Promoter	ENSG00000067606.11	289
chr1	2017132	2017439	Intron (ENST00000378567.3/ENSG00000067606.11, intron 4 of 17)	ENSG00000067606.11	3445	chr1	2015362	2016027	Intron (ENST00000378567.3/ENSG00000067606.11, intron 4 of 17)	ENSG00000067606.11	1675
chr1	2019984	2020224	Intron (ENST00000378567.3/ENSG00000067606.11, intron 4 of 17)	ENSG00000067606.11	6297	chr1	2016817	2017087	Intron (ENST00000378567.3/ENSG00000067606.11, intron 4 of 17)	ENSG00000067606.11	3130
chr1	2021261	2021866	Intron (ENST00000378567.3/ENSG00000067606.11, intron 4 of 17)	ENSG00000067606.11	7574	chr1	2017843	2018352	Intron (ENST00000378567.3/ENSG00000067606.11, intron 4 of 17)	ENSG00000067606.11	4156
chr1	2022646	2023005	Intron (ENST00000378567.3/ENSG00000067606.11, intron 4 of 17)	ENSG00000067606.11	8959	chr1	2019101	2019965	Intron (ENST00000378567.3/ENSG00000067606.11, intron 4 of 17)	ENSG00000067606.11	5414
chr1	2024275	2025196	Intron (ENST00000378567.3/ENSG00000067606.11, intron 4 of 17)	ENSG00000067606.11	10588	chr1	2021598	2021928	Intron (ENST00000378567.3/ENSG00000067606.11, intron 4 of 17)	ENSG00000067606.11	7911
chr1	2026234	2026474	Intron (ENST00000378567.3/ENSG00000067606.11, intron 4 of 17)	ENSG00000067606.11	-9681	chr1	2022122	2022647	Intron (ENST00000378567.3/ENSG00000067606.11, intron 4 of 17)	ENSG00000067606.11	8435
chr1	2026731	2027336	Intron (ENST00000378567.3/ENSG00000067606.11, intron 4 of 17)	ENSG00000067606.11	-8819	chr1	2022825	2023552	Intron (ENST00000378567.3/ENSG00000067606.11, intron 4 of 17)	ENSG00000067606.11	9138
chr1	2027745	2028003	Intron (ENST00000378567.3/ENSG00000067606.11, intron 4 of 17)	ENSG00000067606.11	-8152	chr1	2024644	2024918	Intron (ENST00000378567.3/ENSG00000067606.11, intron 4 of 17)	ENSG00000067606.11	10957
chr1	2028863	2029172	Intron (ENST00000378567.3/ENSG00000067606.11, intron 4 of 17)	ENSG00000067606.11	-6983	chr1	2025361	2025576	Intron (ENST00000378567.3/ENSG00000067606.11, intron 4 of 17)	ENSG00000067606.11	-10579
chr1	2033057	2033776	Intron (ENST00000378567.3/ENSG00000067606.11, intron 4 of 17)	ENSG00000067606.11	-2379	chr1	2026144	2026712	Intron (ENST00000378567.3/ENSG00000067606.11, intron 4 of 17)	ENSG00000067606.11	-9443
chr1	2034535	2037287	Promoter	ENSG00000067606.11	0	chr1	2027861	2028377	Intron (ENST00000378567.3/ENSG00000067606.11, intron 4 of 17)	ENSG00000067606.11	-7778
chr1	2037467	2038101	Intron (ENST00000378567.3/ENSG00000067606.11, intron 4 of 17)	ENSG00000067606.11	1289	chr1	2029035	2029338	Intron (ENST00000378567.3/ENSG00000067606.11, intron 4 of 17)	ENSG00000067606.11	-6817
chr1	2038257	2039040	Intron (ENST00000378567.3/ENSG00000067606.11, intron 4 of 17)	ENSG00000067606.11	2079	chr1	2030371	2030876	Intron (ENST00000378567.3/ENSG00000067606.11, intron 4 of 17)	ENSG00000067606.11	-5279
chr1	2039366	2040110	Intron (ENST00000378567.3/ENSG00000067606.11, intron 4 of 17)	ENSG00000067606.11	-2983	chr1	2031258	2031714	Intron (ENST00000378567.3/ENSG00000067606.11, intron 4 of 17)	ENSG00000067606.11	-4441
chr1	2042033	2042481	Promoter	ENSG00000067606.11	-612	chr1	2032907	2033200	Intron (ENST00000378567.3/ENSG00000067606.11, intron 4 of 17)	ENSG00000067606.11	-2955
chr1	2042994	2043497	Promoter	ENSG00000067606.11	0	chr1	2034774	2035546	Promoter	ENSG00000067606.11	-609
chr1	2043689	2044077	Promoter	ENSG00000067606.11	596	chr1	2036583	2036798	Promoter	ENSG00000067606.11	405
chr1	2046250	2046502	Intron (ENST00000378567.3/ENSG00000067606.11, intron 4 of 17)	ENSG00000067606.11	-1142	chr1	2037004	2037306	Promoter	ENSG00000067606.11	826
chr1	2055990	2057889	Intron (ENST00000378567.3/ENSG00000067606.11, intron 4 of 17)	ENSG00000067606.11	-7188	chr1	2037523	2037903	Intron (ENST00000378567.3/ENSG00000067606.11, intron 4 of 17)	ENSG00000067606.11	1345
chr1	2058442	2058770	Intron (ENST00000378567.3/ENSG00000067606.11, intron 4 of 17)	ENSG00000067606.11	-6307	chr1	2038134	2038957	Intron (ENST00000378567.3/ENSG00000067606.11, intron 4 of 17)	ENSG00000067606.11	1956
chr1	2059616	2060311	Intron (ENST00000378567.3/ENSG00000067606.11, intron 4 of 17)	ENSG00000067606.11	-4766	chr1	2039551	2039926	Intron (ENST00000378567.3/ENSG00000067606.11, intron 4 of 17)	ENSG00000067606.11	-3167
chr1	2060713	2061210	Intron (ENST00000378567.3/ENSG00000067606.11, intron 4 of 17)	ENSG00000067606.11	-3867	chr1	2041015	2041397	Intron (ENST00000378567.3/ENSG00000067606.11, intron 4 of 17)	ENSG00000067606.11	-1696
chr1	2062643	2062883	Intron (ENST00000378567.3/ENSG00000067606.11, intron 4 of 17)	ENSG00000067606.11	-2194	chr1	2042201	2042669	Promoter	ENSG00000067606.11	-424
chr1	2065736	2066021	Promoter	ENSG00000067606.11	-231	chr1	2042958	2043382	Promoter	ENSG00000067606.11	0
chr1	2066216	2066925	Promoter	ENSG00000067606.11	0	chr1	2044464	2044767	Intron (ENST00000378567.3/ENSG00000067606.11, intron 4 of 17)	ENSG00000067606.11	1371
chr1	2070554	2070798	Intron (ENST00000378567.3/ENSG00000067606.11, intron 5 of 17)	ENSG00000067606.11	3853	chr1	2045701	2047305	Promoter	ENSG00000067606.11	-339
chr1	2075223	2075559	Promoter	ENSG00000067606.11	-331	chr1	2048366	2048823	Promoter	ENSG00000067606.11	722
chr1	2076225	2076465	Promoter	ENSG00000271806.1	253	chr1	2056075	2056555	Intron (ENST00000378567.3/ENSG00000067606.11, intron 4 of 17)	ENSG00000067606.11	8431
chr1	2076628	2078109	Promoter	ENSG00000067606.11	0	chr1	2056756	2057578	Intron (ENST00000378567.3/ENSG00000067606.11, intron 4 of 17)	ENSG00000067606.11	-7499
chr1	2078606	2078846	Intron (ENST00000378567.3/ENSG00000067606.11, intron 7 of 17)	ENSG00000067606.11	1780	chr1	2057897	2058528	Intron (ENST00000378567.3/ENSG00000067606.11, intron 4 of 17)	ENSG00000067606.11	-6549
chr1	2079401	2079686	Intron (ENST00000378567.3/ENSG00000067606.11, intron 7 of 17)	ENSG00000067606.11	2575	chr1	2059755	2060057	Intron (ENST00000378567.3/ENSG00000067606.11, intron 4 of 17)	ENSG00000067606.11	-5020
chr1	2079899	2080583	3' UTR	ENSG00000067606.11	3073	chr1	2060203	2060738	Intron (ENST00000378567.3/ENSG00000067606.11, intron 4 of 17)	ENSG00000067606.11	-4339
chr1	2082227	2083025	3' UTR	ENSG00000067606.11	5401	chr1	2061758	2062018	Intron (ENST00000378567.3/ENSG00000067606.11, intron 4 of 17)	ENSG00000067606.11	-3059
chr1	2083344	2083584	Intron (ENST00000378567.3/ENSG00000067606.11, intron 9 of 17)	ENSG00000067606.11	6518	chr1	2065672	2065892	Promoter	ENSG00000067606.11	-360
chr1	2083873	2085551	Intron (ENST00000378567.3/ENSG00000067606.11, intron 9 of 17)	ENSG00000067606.11	7047	chr1	2066556	2066858	Promoter	ENSG00000067606.11	0
chr1	2086383	2087074	Intron (ENST00000378567.3/ENSG00000067606.11, intron 9 of 17)	ENSG00000067606.11	9557	chr1	2073720	2073976	Exon (ENST00000606533.1/ENSG00000271806.1, exon 1 of 1)	ENSG00000067606.11	-1914
chr1	2088424	2088833	Intron (ENST00000378567.3/ENSG00000067606.11, intron 10 of 17)	ENSG00000067606.11	-11454	chr1	2075251	2075603	Promoter	ENSG00000067606.11	-287
chr1	2089303	2089721	Intron (ENST00000378567.3/ENSG00000067606.11, intron 10 of 17)	ENSG00000067606.11	-10566	chr1	2075853	2076551	Promoter	ENSG00000067606.11	0
chr1	2091879	2092366	Intron (ENST00000378567.3/ENSG00000067606.11, intron 10 of 17)	ENSG00000067606.11	-7921	chr1	2077619	2078042	Promoter	ENSG00000067606.11	793
chr1	2092825	2093065	Intron (ENST00000378567.3/ENSG00000067606.11, intron 10 of 17)	ENSG00000067606.11	-7222	chr1	2080569	2080978	Intron (ENST00000378567.3/ENSG00000067606.11, intron 8 of 17)	ENSG00000067606.11	3743
chr1	2093426	2094216	Intron (ENST00000378567.3/ENSG00000067606.11, intron 10 of 17)	ENSG00000067606.11	-6071	chr1	2083183	2084401	Intron (ENST00000378567.3/ENSG00000067606.11, intron 9 of 17)	ENSG00000067606.11	6357
chr1	2096379	2097048	Intron (ENST00000378567.3/ENSG00000067606.11, intron 10 of 17)	ENSG00000067606.11	-3239	chr1	2085064	2085436	Intron (ENST00000378567.3/ENSG00000067606.11, intron 9 of 17)	ENSG00000067606.11	8238
chr1	2098064	2098350	Intron (ENST00000378567.3/ENSG00000067606.11, intron 10 of 17)	ENSG00000067606.11	-1937	chr1	2085584	2086276	Intron (ENST00000378567.3/ENSG00000067606.11, intron 9 of 17)	ENSG00000067606.11	8758
chr1	2099663	2099938	Promoter	ENSG00000067606.11	-349	chr1	2086658	2086988	Intron (ENST00000378567.3/ENSG00000067606.11, intron 9 of 17)	ENSG00000067606.11	9832
chr1	2100589	2100986	Promoter	ENSG00000067606.11	175	chr1	2089343	2090024	Intron (ENST00000378567.3/ENSG00000067606.11, intron 10 of 17)	ENSG00000067606.11	-10263
chr1	2101359	2101619	Promoter	ENSG00000067606.11	945	chr1	2090294	2090509	Intron (ENST00000378567.3/ENSG00000067606.11, intron 10 of 17)	ENSG00000067606.11	-9778
chr1	2101828	2102068	Intron (ENST00000378567.3/ENSG00000067606.11, intron 11 of 17)	ENSG00000067606.11	1414	chr1	2090696	2091225	Intron (ENST00000378567.3/ENSG00000067606.11, intron 10 of 17)	ENSG00000067606.11	-9062
chr1	2103405	2103645	Exon (ENST00000378567.3/ENSG00000067606.11, exon 12 of 18)	ENSG00000067606.11	2991	chr1	2091909	2092124	Intron (ENST00000378567.3/ENSG00000067606.11, intron 10 of 17)	ENSG00000067606.11	-8163
chr1	2104085	2105286	Intron (ENST00000378567.3/ENSG00000067606.11, intron 13 of 17)	ENSG00000067606.11	3671	chr1	2092510	2092929	Intron (ENST00000378567.3/ENSG00000067606.11, intron 10 of 17)	ENSG00000067606.11	-7358
chr1	2107162	2108182	Intron (ENST00000378567.3/ENSG00000067606.11, intron 16 of 17)	ENSG00000067606.11	6748	chr1	2095950	2096393	Intron (ENST00000378567.3/ENSG00000067606.11, intron 10 of 17)	ENSG00000067606.11	-3894
chr1	2108938	2110613	Intron (ENST00000378567.3/ENSG00000067606.11, intron 16 of 17)	ENSG00000182873.4	4701	chr1	2096637	2096867	Intron (ENST00000378567.3/ENSG00000067606.11, intron 10 of 17)	ENSG00000067606.11	-3420
chr1	2110899	2111139	Intron (ENST00000378567.3/ENSG00000067606.11, intron 16 of 17)	ENSG00000182873.4	4175	chr1	2097447	2098377	Intron (ENST00000378567.3/ENSG00000067606.11, intron 10 of 17)	ENSG00000067606.11	-1910
chr1	2112617	2112885	Intron (ENST00000378567.3/ENSG00000067606.11, intron 16 of 17)	ENSG00000182873.4	2429	chr1	2099032	2099247	Intron (ENST00000378567.3/ENSG00000067606.11, intron 10 of 17)	ENSG00000067606.11	-1040
chr1	2113658	2113898	Exon (ENST00000333854.2/ENSG00000182873.4, exon 2 of 2)	ENSG00000182873.4	1416	chr1	2099456	2099889	Promoter	ENSG00000067606.11	-398
chr1	2114197	2114437	Promoter	ENSG00000182873.4	877	chr1	2100197	2100658	Promoter	ENSG00000067606.11	0
chr1	2115426	2116675	Promoter	ENSG00000182873.4	0	chr1	2100812	2101114	Promoter	ENSG00000067606.11	398
chr1	2116997	2117481	3' UTR	ENSG00000182873.4	-1169	chr1	2101699	2101936	Intron (ENST00000378567.3/ENSG00000067606.11, intron 11 of 17)	ENSG00000067606.11	1285
chr1	2121592	2121989	Promoter	ENSG00000269554.1	355	chr1	2103010	2103715	Exon (ENST00000378567.3/ENSG00000067606.11, exon 12 of 18)	ENSG00000067606.11	2596
chr1	2122152	2122453	Promoter	ENSG00000269554.1	915	chr1	2103971	2104339	Intron (ENST00000378567.3/ENSG00000067606.11, intron 13 of 17)	ENSG00000067606.11	3557
chr1	2124294	2124978	Promoter	ENSG00000162585.12	569	chr1	2107138	2107373	Intron (ENST00000378567.3/ENSG00000067606.11, intron 16 of 17)	ENSG00000067606.11	6724
chr1	2128471	2128809	Intron (ENST00000469733.1/ENSG00000162585.12, intron 6 of 7)	ENSG00000162585.12	1618	chr1	2107711	2108144	Intron (ENST00000378567.3/ENSG00000067606.11, intron 16 of 17)	ENSG00000182873.4	7170
chr1	2129070	2129482	Promoter	ENSG00000162585.12	945	chr1	2108766	2109070	Intron (ENST00000378567.3/ENSG00000067606.11, intron 16 of 17)	ENSG00000182873.4	6244
chr1	2130331	2130843	Promoter	ENSG00000162585.12	0	chr1	2109679	2109944	Intron (ENST00000378567.3/ENSG00000067606.11, intron 16 of 17)	ENSG00000182873.4	5370
chr1	2132245	2132625	Promoter	ENSG00000162585.12	-899	chr1	2110113	2111261	Intron (ENST00000378567.3/ENSG00000067606.11, intron 16 of 17)	ENSG00000182873.4	4053
chr1	2135937	2136185	Promoter	ENSG00000162585.12	-616	chr1	2113997	2114438	Promoter	ENSG00000182873.4	876
chr1	2138770	2139129	Promoter	ENSG00000162585.12	43	chr1	2114669	2114884	Promoter	ENSG00000182873.4	430
chr1	2140137	2140408	Promoter	ENSG00000162585.12	-965	chr1	2115433	2115824	Promoter	ENSG00000182873.4	0
chr1	2141484	2141784	Intron (ENST00000487186.1/ENSG00000162585.12, intron 2 of 7)	ENSG00000234396.3	-2178	chr1	2116425	2116798	Promoter	ENSG00000182873.4	-597
chr1	2141983	2142223	Intron (ENST00000487186.1/ENSG00000162585.12, intron 2 of 7)	ENSG00000234396.3	-1739	chr1	2128086	2128380	Intron (ENST00000469733.1/ENSG00000162585.12, intron 6 of 7)	ENSG00000162585.12	-1872
chr1	2144637	2145054	Promoter	ENSG00000162585.12	-478	chr1	2129132	2129392	Intron (ENST00000469733.1/ENSG00000162585.12, intron 6 of 7)	ENSG00000162585.12	1035
chr1	2145704	2146274	Promoter	ENSG00000203301.2	-84	chr1	2130027	2130574	Promoter	ENSG00000162585.12	0
chr1	2146599	2147359	Promoter	ENSG00000203301.2	-979	chr1	2131037	2131264	Promoter	ENSG00000162585.12	82
chr1	2147693	2147951	Intron (ENST00000442483.2/ENSG00000234396.3, intron 1 of 1)	ENSG00000203301.2	-2073	chr1	2132862	2133161	Intron (ENST00000469733.1/ENSG00000162585.12, intron 4 of 7)	ENSG00000162585.12	-1516
chr1	2148227	2148718	Intron (ENST00000442483.2/ENSG00000234396.3, intron 1 of 1)	ENSG00000203301.2	-2607	chr1	2133679	2134145	Intron (ENST00000469733.1/ENSG00000162585.12, intron 4 of 7)	ENSG00000162585.12	1176
chr1	2150492	2151003	Intron (ENST00000442483.2/ENSG00000234396.3, intron 1 of 1)	ENSG00000203301.2	-4872	chr1	2134409	2135018	Promoter	ENSG00000162585.12	303
chr1	2157782	2158056	Distal Intergenic	ENSG00000157933.9	-2078	chr1	2138497	2139216	Promoter	ENSG00000162585.12	0
chr1	2163809	2164492	Promoter	ENSG00000157933.9	0	chr1	2141049	2141573	Intron (ENST00000487186.1/ENSG00000162585.12, intron 2 of 7)	ENSG00000162585.12	-1877
chr1	2166816	2167095	Intron (ENST00000378536.4/ENSG00000157933.9, intron 1 of 6)	ENSG00000157933.9	2898	chr1	2141884	2142166	Intron (ENST00000487186.1/ENSG00000162585.12, intron 2 of 7)	ENSG00000234396.3	-1796
chr1	2167436	2167736	Intron (ENST00000378536.4/ENSG00000157933.9, intron 1 of 6)	ENSG00000157933.9	3518	chr1	2145654	2146063	Promoter	ENSG00000203301.2	-34
chr1	2168382	2168983	Intron (ENST00000378536.4/ENSG00000157933.9, intron 1 of 6)	ENSG00000157933.9	4464	chr1	2146969	2147417	Intron (ENST00000442483.2/ENSG00000234396.3, intron 1 of 1)	ENSG00000203301.2	-1349
chr1	2170245	2170485	Intron (ENST00000378536.4/ENSG00000157933.9, intron 1 of 6)	ENSG00000157933.9	6327	chr1	2147821	2148128	Intron (ENST00000442483.2/ENSG00000234396.3, intron 1 of 1)	ENSG00000203301.2	-2201
chr1	2173564	2173897	Intron (ENST00000378536.4/ENSG00000157933.9, intron 1 of 6)	ENSG00000157933.9	-5538	chr1	2150667	2150909	Intron (ENST00000442483.2/ENSG00000234396.3, intron 1 of 1)	ENSG00000203301.2	-5047
chr1	2174599	2175491	Intron (ENST00000378536.4/ENSG00000157933.9, intron 1 of 6)	ENSG00000157933.9	-3944	chr1	2155394	2155716	Distal Intergenic	ENSG00000157933.9	-4418
chr1	2178331	2178784	Promoter	ENSG00000157933.9	-651	chr1	2155920	2156491	Distal Intergenic	ENSG00000157933.9	-3643
chr1	2179148	2180174	Promoter	ENSG00000157933.9	0	chr1	2164125	2164738	Promoter	ENSG00000157933.9	207
chr1	2180492	2180836	Intron (ENST00000378536.4/ENSG00000157933.9, intron 1 of 6)	ENSG00000157933.9	1057	chr1	2167062	2167313	Intron (ENST00000378536.4/ENSG00000157933.9, intron 1 of 6)	ENSG00000157933.9	3144
chr1	2181469	2181709	Intron (ENST00000378536.4/ENSG00000157933.9, intron 1 of 6)	ENSG00000157933.9	2034	chr1	2168455	2169141	Intron (ENST00000378536.4/ENSG00000157933.9, intron 1 of 6)	ENSG00000157933.9	4537
chr1	2184820	2185855	Intron (ENST00000378536.4/ENSG00000157933.9, intron 1 of 6)	ENSG00000157933.9	5385	chr1	2169453	2170321	Intron (ENST00000378536.4/ENSG00000157933.9, intron 1 of 6)	ENSG00000157933.9	5535
chr1	2190497	2190771	Intron (ENST00000378536.4/ENSG00000157933.9, intron 1 of 6)	ENSG00000157933.9	11062	chr1	2170631	2170980	Intron (ENST00000378536.4/ENSG00000157933.9, intron 1 of 6)	ENSG00000157933.9	6713
chr1	2203059	2203432	Intron (ENST00000378536.4/ENSG00000157933.9, intron 1 of 6)	ENSG00000157933.9	23624	chr1	2171537	2172023	Intron (ENST00000378536.4/ENSG00000157933.9, intron 1 of 6)	ENSG00000157933.9	-7412
chr1	2204178	2204556	Intron (ENST00000378536.4/ENSG00000157933.9, intron 1 of 6)	ENSG00000157933.9	24743	chr1	2174128	2174343	Intron (ENST00000378536.4/ENSG00000157933.9, intron 1 of 6)	ENSG00000157933.9	-5092
chr1	2204840	2205657	Intron (ENST00000378536.4/ENSG00000157933.9, intron 1 of 6)	ENSG00000157933.9	25405	chr1	2182386	2182820	Intron (ENST00000378536.4/ENSG00000157933.9, intron 1 of 6)	ENSG00000157933.9	2951
chr1	2206840	2207174	Intron (ENST00000378536.4/ENSG00000157933.9, intron 1 of 6)	ENSG00000157933.9	27405	chr1	2184661	2185296	Intron (ENST00000378536.4/ENSG00000157933.9, intron 1 of 6)	ENSG00000157933.9	5226
chr1	2208001	2208298	Intron (ENST00000378536.4/ENSG00000157933.9, intron 1 of 6)	ENSG00000157933.9	-26787	chr1	2186369	2186921	Intron (ENST00000378536.4/ENSG00000157933.9, intron 1 of 6)	ENSG00000157933.9	6934
chr1	2209170	2209664	Intron (ENST00000378536.4/ENSG00000157933.9, intron 1 of 6)	ENSG00000157933.9	-25421	chr1	2188237	2188701	Intron (ENST00000378536.4/ENSG00000157933.9, intron 1 of 6)	ENSG00000157933.9	8802
chr1	2210337	2211560	Intron (ENST00000378536.4/ENSG00000157933.9, intron 1 of 6)	ENSG00000157933.9	-23525	chr1	2191285	2191657	Intron (ENST00000378536.4/ENSG00000157933.9, intron 1 of 6)	ENSG00000157933.9	11850
chr1	2213764	2214004	Intron (ENST00000378536.4/ENSG00000157933.9, intron 1 of 6)	ENSG00000157933.9	-21081	chr1	2198890	2199436	Intron (ENST00000378536.4/ENSG00000157933.9, intron 1 of 6)	ENSG00000157933.9	19455
chr1	2214323	2214769	Intron (ENST00000378536.4/ENSG00000157933.9, intron 1 of 6)	ENSG00000157933.9	-20316	chr1	2202407	2203332	Intron (ENST00000378536.4/ENSG00000157933.9, intron 1 of 6)	ENSG00000157933.9	22972
chr1	2215077	2215345	Intron (ENST00000378536.4/ENSG00000157933.9, intron 1 of 6)	ENSG00000157933.9	-19740	chr1	2204676	2205425	Intron (ENST00000378536.4/ENSG00000157933.9, intron 1 of 6)	ENSG00000157933.9	25241
chr1	2216211	2216907	Intron (ENST00000378536.4/ENSG00000157933.9, intron 1 of 6)	ENSG00000157933.9	-18178	chr1	2205700	2206296	Intron (ENST00000378536.4/ENSG00000157933.9, intron 1 of 6)	ENSG00000157933.9	26265
chr1	2219714	2220230	Intron (ENST00000378536.4/ENSG00000157933.9, intron 1 of 6)	ENSG00000157933.9	-14855	chr1	2206824	2207115	Intron (ENST00000378536.4/ENSG00000157933.9, intron 1 of 6)	ENSG00000157933.9	27389
chr1	2221826	2222492	Intron (ENST00000378536.4/ENSG00000157933.9, intron 1 of 6)	ENSG00000157933.9	-12593	chr1	2208168	2208427	Intron (ENST00000378536.4/ENSG00000157933.9, intron 1 of 6)	ENSG00000157933.9	-26658
chr1	2222796	2223036	Intron (ENST00000378536.4/ENSG00000157933.9, intron 1 of 6)	ENSG00000157933.9	-12049	chr1	2211834	2212094	Intron (ENST00000378536.4/ENSG00000157933.9, intron 1 of 6)	ENSG00000157933.9	-22991
chr1	2228659	2229415	Intron (ENST00000378536.4/ENSG00000157933.9, intron 1 of 6)	ENSG00000157933.9	-5670	chr1	2215644	2215859	Intron (ENST00000378536.4/ENSG00000157933.9, intron 1 of 6)	ENSG00000157933.9	-19226
chr1	2229605	2230204	Intron (ENST00000378536.4/ENSG00000157933.9, intron 1 of 6)	ENSG00000157933.9	-4881	chr1	2216276	2216716	Intron (ENST00000378536.4/ENSG00000157933.9, intron 1 of 6)	ENSG00000157933.9	-18369
chr1	2231158	2231431	Intron (ENST00000378536.4/ENSG00000157933.9, intron 1 of 6)	ENSG00000157933.9	-3654	chr1	2221039	2221290	Intron (ENST00000378536.4/ENSG00000157933.9, intron 1 of 6)	ENSG00000157933.9	-13795
chr1	2231783	2232459	Intron (ENST00000378536.4/ENSG00000157933.9, intron 1 of 6)	ENSG00000157933.9	-2626	chr1	2224469	2224712	Intron (ENST00000378536.4/ENSG00000157933.9, intron 1 of 6)	ENSG00000157933.9	-10373
chr1	2233734	2233991	Intron (ENST00000378536.4/ENSG00000157933.9, intron 1 of 6)	ENSG00000157933.9	-1094	chr1	2225897	2226162	Intron (ENST00000378536.4/ENSG00000157933.9, intron 1 of 6)	ENSG00000157933.9	-8923
chr1	2234207	2234661	Promoter	ENSG00000157933.9	-424	chr1	2228902	2229700	Intron (ENST00000378536.4/ENSG00000157933.9, intron 1 of 6)	ENSG00000157933.9	-5385
chr1	2234888	2235239	Promoter	ENSG00000157933.9	0	chr1	2230055	2230659	Intron (ENST00000378536.4/ENSG00000157933.9, intron 1 of 6)	ENSG00000157933.9	-4426
chr1	2244866	2245268	Distal Intergenic	ENSG00000157933.9	9781	chr1	2231621	2232074	Intron (ENST00000378536.4/ENSG00000157933.9, intron 1 of 6)	ENSG00000157933.9	-3011
chr1	2249780	2250062	Distal Intergenic	ENSG00000272161.1	8070	chr1	2232329	2233093	Intron (ENST00000378536.4/ENSG00000157933.9, intron 1 of 6)	ENSG00000157933.9	-1992
chr1	2250559	2251756	Distal Intergenic	ENSG00000272161.1	6376	chr1	2233274	2233600	Intron (ENST00000378536.4/ENSG00000157933.9, intron 1 of 6)	ENSG00000157933.9	-1485
chr1	2253583	2253823	Intron (ENST00000378531.3/ENSG00000116151.9, intron 13 of 13)	ENSG00000272161.1	4309	chr1	2234426	2235033	Promoter	ENSG00000157933.9	-52
chr1	2254329	2254946	Intron (ENST00000378531.3/ENSG00000116151.9, intron 13 of 13)	ENSG00000272161.1	3186	chr1	2235803	2236335	Promoter	ENSG00000157933.9	718
chr1	2255527	2255793	Exon (ENST00000378531.3/ENSG00000116151.9, exon 13 of 14)	ENSG00000272161.1	2339	chr1	2236630	2237285	Intron (ENST00000378536.4/ENSG00000157933.9, intron 5 of 6)	ENSG00000157933.9	1545
chr1	2256101	2256397	Intron (ENST00000378531.3/ENSG00000116151.9, intron 12 of 13)	ENSG00000272161.1	1735	chr1	2239622	2239916	3' UTR	ENSG00000157933.9	4537
chr1	2259199	2261963	Promoter	ENSG00000269753.1	618	chr1	2244931	2245240	Distal Intergenic	ENSG00000157933.9	9846
chr1	2262149	2263077	Intron (ENST00000378531.3/ENSG00000116151.9, intron 12 of 13)	ENSG00000269753.1	3568	chr1	2248298	2248653	Distal Intergenic	ENSG00000272161.1	9479
chr1	2263773	2264279	Exon (ENST00000606372.1/ENSG00000116151.9, exon 12 of 12)	ENSG00000269753.1	5192	chr1	2249616	2249939	Distal Intergenic	ENSG00000272161.1	8193
chr1	2264911	2265434	Intron (ENST00000378531.3/ENSG00000116151.9, intron 12 of 13)	ENSG00000269753.1	6330	chr1	2250326	2251103	Distal Intergenic	ENSG00000272161.1	7029
chr1	2265589	2265829	Intron (ENST00000378531.3/ENSG00000116151.9, intron 12 of 13)	ENSG00000269753.1	7008	chr1	2251527	2252321	Distal Intergenic	ENSG00000272161.1	5811
chr1	2266053	2266846	Intron (ENST00000378531.3/ENSG00000116151.9, intron 12 of 13)	ENSG00000269753.1	7472	chr1	2253031	2253254	Intron (ENST00000378531.3/ENSG00000116151.9, intron 13 of 13)	ENSG00000272161.1	4878
chr1	2267008	2267478	Intron (ENST00000378531.3/ENSG00000116151.9, intron 12 of 13)	ENSG00000269753.1	8427	chr1	2254388	2255618	Exon (ENST00000378531.3/ENSG00000116151.9, exon 13 of 14)	ENSG00000272161.1	2514
chr1	2268403	2268931	Intron (ENST00000378531.3/ENSG00000116151.9, intron 10 of 13)	ENSG00000269753.1	9822	chr1	2257824	2258175	Promoter	ENSG00000272161.1	0
chr1	2269887	2270659	Intron (ENST00000378531.3/ENSG00000116151.9, intron 10 of 13)	ENSG00000269753.1	11306	chr1	2259015	2260190	Promoter	ENSG00000269753.1	434
chr1	2270832	2271658	Intron (ENST00000378531.3/ENSG00000116151.9, intron 10 of 13)	ENSG00000238240.2	11638	chr1	2260461	2261069	Intron (ENST00000378531.3/ENSG00000116151.9, intron 12 of 13)	ENSG00000269753.1	1880
chr1	2272358	2272926	Intron (ENST00000378531.3/ENSG00000116151.9, intron 10 of 13)	ENSG00000238240.2	10370	chr1	2261411	2261626	Intron (ENST00000378531.3/ENSG00000116151.9, intron 12 of 13)	ENSG00000269753.1	2830
chr1	2274496	2275277	Intron (ENST00000378531.3/ENSG00000116151.9, intron 10 of 13)	ENSG00000238240.2	8019	chr1	2261857	2262837	Intron (ENST00000378531.3/ENSG00000116151.9, intron 12 of 13)	ENSG00000269753.1	3276
chr1	2275920	2276789	Intron (ENST00000378531.3/ENSG00000116151.9, intron 10 of 13)	ENSG00000238240.2	6507	chr1	2263006	2263297	Intron (ENST00000378531.3/ENSG00000116151.9, intron 12 of 13)	ENSG00000269753.1	4425
chr1	2276958	2277302	Intron (ENST00000378531.3/ENSG00000116151.9, intron 10 of 13)	ENSG00000238240.2	5994	chr1	2263539	2264319	Exon (ENST00000606372.1/ENSG00000116151.9, exon 12 of 12)	ENSG00000269753.1	4958
chr1	2277566	2278816	Intron (ENST00000378531.3/ENSG00000116151.9, intron 10 of 13)	ENSG00000238240.2	4480	chr1	2264715	2265678	Intron (ENST00000378531.3/ENSG00000116151.9, intron 12 of 13)	ENSG00000269753.1	6134
chr1	2279075	2279387	Intron (ENST00000378531.3/ENSG00000116151.9, intron 10 of 13)	ENSG00000238240.2	3909	chr1	2266693	2268143	Exon (ENST00000378531.3/ENSG00000116151.9, exon 12 of 14)	ENSG00000269753.1	8112
chr1	2281344	2281615	Intron (ENST00000378531.3/ENSG00000116151.9, intron 10 of 13)	ENSG00000238240.2	1681	chr1	2268508	2269013	Intron (ENST00000378531.3/ENSG00000116151.9, intron 10 of 13)	ENSG00000269753.1	9927
chr1	2283778	2284467	Promoter	ENSG00000269896.1	0	chr1	2269230	2269445	Intron (ENST00000378531.3/ENSG00000116151.9, intron 10 of 13)	ENSG00000269753.1	10649
chr1	2285756	2286142	Intron (ENST00000378531.3/ENSG00000116151.9, intron 10 of 13)	ENSG00000269896.1	-1497	chr1	2269867	2270183	Intron (ENST00000378531.3/ENSG00000116151.9, intron 10 of 13)	ENSG00000269753.1	11286
chr1	2286914	2288041	Intron (ENST00000378531.3/ENSG00000116151.9, intron 10 of 13)	ENSG00000269896.1	-2655	chr1	2270861	2271590	Intron (ENST00000378531.3/ENSG00000116151.9, intron 10 of 13)	ENSG00000238240.2	11706
chr1	2288237	2288687	Intron (ENST00000378531.3/ENSG00000116151.9, intron 10 of 13)	ENSG00000269896.1	-3978	chr1	2271746	2272646	Intron (ENST00000378531.3/ENSG00000116151.9, intron 10 of 13)	ENSG00000238240.2	10650
chr1	2288871	2289563	Exon (ENST00000378531.3/ENSG00000116151.9, exon 10 of 14)	ENSG00000269896.1	-4612	chr1	2273633	2273966	Intron (ENST00000378531.3/ENSG00000116151.9, intron 10 of 13)	ENSG00000238240.2	9330
chr1	2290426	2290900	Intron (ENST00000378531.3/ENSG00000116151.9, intron 8 of 13)	ENSG00000272420.1	4167	chr1	2274649	2274991	Intron (ENST00000378531.3/ENSG00000116151.9, intron 10 of 13)	ENSG00000238240.2	8305
chr1	2291292	2292075	Intron (ENST00000378531.3/ENSG00000116151.9, intron 8 of 13)	ENSG00000272420.1	2992	chr1	2275590	2275857	Intron (ENST00000378531.3/ENSG00000116151.9, intron 10 of 13)	ENSG00000238240.2	7439
chr1	2292332	2292572	Intron (ENST00000378531.3/ENSG00000116151.9, intron 8 of 13)	ENSG00000272420.1	2495	chr1	2277040	2277341	Intron (ENST00000378531.3/ENSG00000116151.9, intron 10 of 13)	ENSG00000238240.2	5955
chr1	2293922	2294203	Promoter	ENSG00000272420.1	864	chr1	2277537	2278451	Intron (ENST00000378531.3/ENSG00000116151.9, intron 10 of 13)	ENSG00000238240.2	4845
chr1	2300329	2300723	Intron (ENST00000378531.3/ENSG00000116151.9, intron 8 of 13)	ENSG00000272420.1	-5262	chr1	2278706	2279286	Intron (ENST00000378531.3/ENSG00000116151.9, intron 10 of 13)	ENSG00000238240.2	4010
chr1	2303808	2304136	Exon (ENST00000378531.3/ENSG00000116151.9, exon 8 of 14)	ENSG00000271921.1	2656	chr1	2282429	2282678	Promoter	ENSG00000238240.2	618
chr1	2304346	2304637	Intron (ENST00000378531.3/ENSG00000116151.9, intron 7 of 13)	ENSG00000271921.1	2155	chr1	2283682	2283897	Promoter	ENSG00000269896.1	362
chr1	2307213	2307951	Promoter	ENSG00000116151.9	0	chr1	2284133	2284421	Promoter	ENSG00000269896.1	0
chr1	2309640	2310095	Promoter	ENSG00000271847.1	0	chr1	2286502	2286837	3' UTR	ENSG00000269896.1	-2243
chr1	2310929	2311671	Intron (ENST00000378531.3/ENSG00000116151.9, intron 6 of 13)	ENSG00000271847.1	-1130	chr1	2287129	2287782	Intron (ENST00000378531.3/ENSG00000116151.9, intron 10 of 13)	ENSG00000269896.1	-2870
chr1	2314384	2314943	Intron (ENST00000378531.3/ENSG00000116151.9, intron 6 of 13)	ENSG00000116151.9	1617	chr1	2288142	2288654	Intron (ENST00000378531.3/ENSG00000116151.9, intron 10 of 13)	ENSG00000269896.1	-3883
chr1	2315531	2315823	Promoter	ENSG00000116151.9	737	chr1	2290149	2290374	Exon (ENST00000378531.3/ENSG00000116151.9, exon 9 of 14)	ENSG00000272420.1	4693
chr1	2316012	2316841	Promoter	ENSG00000116151.9	0	chr1	2290574	2291103	Intron (ENST00000378531.3/ENSG00000116151.9, intron 8 of 13)	ENSG00000272420.1	3964
chr1	2318349	2318869	Promoter	ENSG00000116151.9	99	chr1	2302132	2302347	Intron (ENST00000378531.3/ENSG00000116151.9, intron 8 of 13)	ENSG00000271921.1	4445
chr1	2328967	2329437	Intron (ENST00000378518.1/ENSG00000157916.14, intron 3 of 4)	ENSG00000157916.14	3523	chr1	2307673	2307888	Promoter	ENSG00000116151.9	-356
chr1	2331391	2331631	Intron (ENST00000378518.1/ENSG00000157916.14, intron 3 of 4)	ENSG00000157916.14	-1759	chr1	2308644	2309506	Promoter	ENSG00000271847.1	293
chr1	2335880	2336235	3' UTR	ENSG00000157916.14	2490	chr1	2310528	2311173	Promoter	ENSG00000271847.1	-729
chr1	2337539	2338075	3' UTR	ENSG00000157911.5	3368	chr1	2312487	2312783	Intron (ENST00000378531.3/ENSG00000116151.9, intron 6 of 13)	ENSG00000271847.1	-2688
chr1	2338703	2339283	Intron (ENST00000288774.3/ENSG00000157911.5, intron 3 of 5)	ENSG00000157911.5	2160	chr1	2314587	2315022	Intron (ENST00000378531.3/ENSG00000116151.9, intron 6 of 13)	ENSG00000116151.9	1538
chr1	2356951	2357290	Promoter	ENSG00000149527.13	-129	chr1	2316047	2316491	Promoter	ENSG00000116151.9	69
chr1	2359186	2360516	Intron (ENST00000609981.1/ENSG00000149527.13, intron 1 of 3)	ENSG00000149527.13	1767	chr1	2319780	2320062	Promoter	ENSG00000116151.9	0
chr1	2360772	2361098	Intron (ENST00000609981.1/ENSG00000149527.13, intron 1 of 3)	ENSG00000149527.13	3353	chr1	2331322	2331537	Intron (ENST00000378518.1/ENSG00000157916.14, intron 3 of 4)	ENSG00000157916.14	-1853
chr1	2361328	2361622	Intron (ENST00000609981.1/ENSG00000149527.13, intron 1 of 3)	ENSG00000149527.13	3909	chr1	2337554	2338139	3' UTR	ENSG00000157911.5	3304
chr1	2361895	2362327	5' UTR	ENSG00000149527.13	4476	chr1	2339750	2340220	5' UTR	ENSG00000157911.5	1223
chr1	2362520	2363253	Intron (ENST00000609981.1/ENSG00000149527.13, intron 2 of 3)	ENSG00000149527.13	5101	chr1	2343016	2343231	Promoter	ENSG00000157911.5	-704
chr1	2363499	2364469	Intron (ENST00000609981.1/ENSG00000149527.13, intron 2 of 3)	ENSG00000149527.13	6080	chr1	2347240	2347750	Distal Intergenic	ENSG00000157911.5	-2004
chr1	2364774	2365690	Intron (ENST00000609981.1/ENSG00000149527.13, intron 2 of 3)	ENSG00000149527.13	7355	chr1	2347998	2348572	Distal Intergenic	ENSG00000157911.5	-2762
chr1	2366379	2366743	Intron (ENST00000609981.1/ENSG00000149527.13, intron 2 of 3)	ENSG00000149527.13	8960	chr1	2349876	2350091	Distal Intergenic	ENSG00000157911.5	-4640
chr1	2368121	2368604	Intron (ENST00000609981.1/ENSG00000149527.13, intron 2 of 3)	ENSG00000149527.13	10702	chr1	2350342	2350938	Distal Intergenic	ENSG00000157911.5	-5106
chr1	2368841	2370618	Intron (ENST00000609981.1/ENSG00000149527.13, intron 2 of 3)	ENSG00000149527.13	11422	chr1	2351728	2352133	Distal Intergenic	ENSG00000149527.13	-5286
chr1	2371238	2371500	Intron (ENST00000609981.1/ENSG00000149527.13, intron 2 of 3)	ENSG00000149527.13	13819	chr1	2353881	2354096	Distal Intergenic	ENSG00000149527.13	-3323
chr1	2371799	2372338	Intron (ENST00000609981.1/ENSG00000149527.13, intron 2 of 3)	ENSG00000149527.13	14380	chr1	2357376	2357933	Promoter	ENSG00000149527.13	0
chr1	2372558	2374360	Intron (ENST00000609981.1/ENSG00000149527.13, intron 2 of 3)	ENSG00000149527.13	15139	chr1	2358906	2359458	Intron (ENST00000609981.1/ENSG00000149527.13, intron 1 of 3)	ENSG00000149527.13	1487
chr1	2376177	2376744	Intron (ENST00000609981.1/ENSG00000149527.13, intron 2 of 3)	ENSG00000149527.13	18758	chr1	2360243	2360709	Intron (ENST00000609981.1/ENSG00000149527.13, intron 1 of 3)	ENSG00000149527.13	2824
chr1	2377364	2377836	Intron (ENST00000609981.1/ENSG00000149527.13, intron 2 of 3)	ENSG00000149527.13	19945	chr1	2361144	2361872	5' UTR	ENSG00000149527.13	3725
chr1	2377988	2379336	Intron (ENST00000609981.1/ENSG00000149527.13, intron 2 of 3)	ENSG00000149527.13	-19562	chr1	2362176	2363088	Intron (ENST00000609981.1/ENSG00000149527.13, intron 2 of 3)	ENSG00000149527.13	4757
chr1	2380021	2380312	Intron (ENST00000609981.1/ENSG00000149527.13, intron 2 of 3)	ENSG00000149527.13	-18586	chr1	2363270	2363965	Intron (ENST00000609981.1/ENSG00000149527.13, intron 2 of 3)	ENSG00000149527.13	5851
chr1	2380694	2381042	Intron (ENST00000609981.1/ENSG00000149527.13, intron 2 of 3)	ENSG00000149527.13	-17856	chr1	2364500	2365419	Intron (ENST00000609981.1/ENSG00000149527.13, intron 2 of 3)	ENSG00000149527.13	7081
chr1	2382452	2382692	Intron (ENST00000609981.1/ENSG00000149527.13, intron 2 of 3)	ENSG00000149527.13	-16206	chr1	2366263	2366767	Intron (ENST00000609981.1/ENSG00000149527.13, intron 2 of 3)	ENSG00000149527.13	8844
chr1	2384366	2384817	Intron (ENST00000609981.1/ENSG00000149527.13, intron 2 of 3)	ENSG00000149527.13	-14081	chr1	2366971	2367345	Intron (ENST00000609981.1/ENSG00000149527.13, intron 2 of 3)	ENSG00000149527.13	9552
chr1	2384977	2386148	Intron (ENST00000609981.1/ENSG00000149527.13, intron 2 of 3)	ENSG00000149527.13	-12750	chr1	2368424	2368667	Intron (ENST00000609981.1/ENSG00000149527.13, intron 2 of 3)	ENSG00000149527.13	11005
chr1	2387540	2388111	Intron (ENST00000609981.1/ENSG00000149527.13, intron 2 of 3)	ENSG00000149527.13	-10787	chr1	2369395	2369835	Intron (ENST00000609981.1/ENSG00000149527.13, intron 2 of 3)	ENSG00000149527.13	11976
chr1	2388318	2389102	Intron (ENST00000609981.1/ENSG00000149527.13, intron 2 of 3)	ENSG00000149527.13	-9796	chr1	2370069	2370284	Intron (ENST00000609981.1/ENSG00000149527.13, intron 2 of 3)	ENSG00000149527.13	12650
chr1	2390544	2390784	Intron (ENST00000609981.1/ENSG00000149527.13, intron 2 of 3)	ENSG00000149527.13	-8114	chr1	2371785	2372100	Intron (ENST00000609981.1/ENSG00000149527.13, intron 2 of 3)	ENSG00000149527.13	14366
chr1	2391411	2391651	Intron (ENST00000609981.1/ENSG00000149527.13, intron 2 of 3)	ENSG00000149527.13	-7247	chr1	2372613	2372987	Intron (ENST00000609981.1/ENSG00000149527.13, intron 2 of 3)	ENSG00000149527.13	15194
chr1	2392093	2392494	Intron (ENST00000609981.1/ENSG00000149527.13, intron 2 of 3)	ENSG00000149527.13	-6404	chr1	2373359	2373748	Intron (ENST00000609981.1/ENSG00000149527.13, intron 2 of 3)	ENSG00000149527.13	15940
chr1	2392833	2393125	Intron (ENST00000609981.1/ENSG00000149527.13, intron 2 of 3)	ENSG00000149527.13	-5773	chr1	2375634	2376949	Intron (ENST00000609981.1/ENSG00000149527.13, intron 2 of 3)	ENSG00000149527.13	18215
chr1	2393878	2394329	Intron (ENST00000609981.1/ENSG00000149527.13, intron 2 of 3)	ENSG00000149527.13	-4569	chr1	2377285	2377544	Intron (ENST00000609981.1/ENSG00000149527.13, intron 2 of 3)	ENSG00000149527.13	19866
chr1	2395052	2395662	Intron (ENST00000609981.1/ENSG00000149527.13, intron 2 of 3)	ENSG00000149527.13	-3236	chr1	2378135	2378729	Intron (ENST00000609981.1/ENSG00000149527.13, intron 2 of 3)	ENSG00000149527.13	-20169
chr1	2395941	2396234	Intron (ENST00000609981.1/ENSG00000149527.13, intron 2 of 3)	ENSG00000149527.13	-2664	chr1	2379117	2379768	Intron (ENST00000609981.1/ENSG00000149527.13, intron 2 of 3)	ENSG00000149527.13	-19130
chr1	2396529	2397392	Intron (ENST00000609981.1/ENSG00000149527.13, intron 2 of 3)	ENSG00000149527.13	-1506	chr1	2380925	2381472	Intron (ENST00000609981.1/ENSG00000149527.13, intron 2 of 3)	ENSG00000149527.13	-17426
chr1	2397643	2398477	Promoter	ENSG00000149527.13	-421	chr1	2383821	2384166	Intron (ENST00000609981.1/ENSG00000149527.13, intron 2 of 3)	ENSG00000149527.13	-14732
chr1	2399885	2400975	Promoter	ENSG00000149527.13	987	chr1	2384340	2385638	Intron (ENST00000609981.1/ENSG00000149527.13, intron 2 of 3)	ENSG00000149527.13	-13260
chr1	2402319	2403523	Intron (ENST00000609981.1/ENSG00000149527.13, intron 2 of 3)	ENSG00000149527.13	3421	chr1	2385808	2386582	Intron (ENST00000609981.1/ENSG00000149527.13, intron 2 of 3)	ENSG00000149527.13	-12316
chr1	2403769	2405771	Intron (ENST00000609981.1/ENSG00000149527.13, intron 2 of 3)	ENSG00000149527.13	-1983	chr1	2387247	2387543	Intron (ENST00000609981.1/ENSG00000149527.13, intron 2 of 3)	ENSG00000149527.13	-11355
chr1	2406180	2406420	Intron (ENST00000609981.1/ENSG00000149527.13, intron 2 of 3)	ENSG00000149527.13	-1334	chr1	2388115	2388330	Intron (ENST00000609981.1/ENSG00000149527.13, intron 2 of 3)	ENSG00000149527.13	-10568
chr1	2406639	2407040	Promoter	ENSG00000149527.13	-714	chr1	2389391	2389972	Intron (ENST00000609981.1/ENSG00000149527.13, intron 2 of 3)	ENSG00000149527.13	-8926
chr1	2407331	2408488	Promoter	ENSG00000149527.13	0	chr1	2392479	2392871	Intron (ENST00000609981.1/ENSG00000149527.13, intron 2 of 3)	ENSG00000149527.13	-6027
chr1	2409341	2410104	Promoter	ENSG00000149527.13	-425	chr1	2393281	2393496	Intron (ENST00000609981.1/ENSG00000149527.13, intron 2 of 3)	ENSG00000149527.13	-5402
chr1	2410397	2411602	Promoter	ENSG00000149527.13	0	chr1	2393951	2394291	Intron (ENST00000609981.1/ENSG00000149527.13, intron 2 of 3)	ENSG00000149527.13	-4607
chr1	2412325	2412717	Promoter	ENSG00000149527.13	998	chr1	2394914	2395959	Intron (ENST00000609981.1/ENSG00000149527.13, intron 2 of 3)	ENSG00000149527.13	-2939
chr1	2413150	2413476	Intron (ENST00000449969.1/ENSG00000149527.13, intron 4 of 21)	ENSG00000149527.13	1823	chr1	2396111	2397760	Intron (ENST00000609981.1/ENSG00000149527.13, intron 2 of 3)	ENSG00000149527.13	-1138
chr1	2414447	2415137	Intron (ENST00000449969.1/ENSG00000149527.13, intron 4 of 21)	ENSG00000149527.13	3120	chr1	2397923	2398480	Promoter	ENSG00000149527.13	-418
chr1	2415916	2416906	Exon (ENST00000449969.1/ENSG00000149527.13, exon 5 of 22)	ENSG00000149527.13	4589	chr1	2400167	2400648	Intron (ENST00000609981.1/ENSG00000149527.13, intron 2 of 3)	ENSG00000149527.13	1269
chr1	2417932	2418882	Exon (ENST00000449969.1/ENSG00000149527.13, exon 6 of 22)	ENSG00000224387.1	5815	chr1	2401613	2401945	Intron (ENST00000609981.1/ENSG00000149527.13, intron 2 of 3)	ENSG00000149527.13	2715
chr1	2420087	2422137	Exon (ENST00000449969.1/ENSG00000149527.13, exon 9 of 22)	ENSG00000224387.1	2560	chr1	2402114	2403616	Intron (ENST00000609981.1/ENSG00000149527.13, intron 2 of 3)	ENSG00000149527.13	3216
chr1	2422300	2423767	Promoter	ENSG00000224387.1	930	chr1	2404294	2404578	Intron (ENST00000609981.1/ENSG00000149527.13, intron 2 of 3)	ENSG00000149527.13	-3176
chr1	2424432	2424760	Promoter	ENSG00000224387.1	0	chr1	2406185	2407781	Promoter	ENSG00000149527.13	0
chr1	2425807	2426116	Promoter	ENSG00000229393.1	0	chr1	2408283	2410463	Promoter	ENSG00000149527.13	-66
chr1	2426287	2427743	Promoter	ENSG00000229393.1	-369	chr1	2410686	2411225	Promoter	ENSG00000149527.13	-102
chr1	2427892	2428247	Promoter	ENSG00000149527.13	-974	chr1	2412378	2412686	Intron (ENST00000449969.1/ENSG00000149527.13, intron 4 of 21)	ENSG00000149527.13	1051
chr1	2428454	2429378	Promoter	ENSG00000149527.13	0	chr1	2413003	2413814	Intron (ENST00000449969.1/ENSG00000149527.13, intron 4 of 21)	ENSG00000149527.13	1676
chr1	2429616	2429856	Promoter	ENSG00000149527.13	-230	chr1	2414101	2414531	Intron (ENST00000449969.1/ENSG00000149527.13, intron 4 of 21)	ENSG00000149527.13	2774
chr1	2430338	2432099	Promoter	ENSG00000149527.13	252	chr1	2414750	2415192	Intron (ENST00000449969.1/ENSG00000149527.13, intron 4 of 21)	ENSG00000149527.13	3423
chr1	2432843	2433365	Exon (ENST00000473964.1/ENSG00000149527.13, exon 4 of 4)	ENSG00000149527.13	2757	chr1	2415500	2416181	Exon (ENST00000449969.1/ENSG00000149527.13, exon 5 of 22)	ENSG00000149527.13	4173
chr1	2434105	2434691	Exon (ENST00000449969.1/ENSG00000149527.13, exon 21 of 22)	ENSG00000149527.13	4019	chr1	2417026	2417994	Intron (ENST00000449969.1/ENSG00000149527.13, intron 5 of 21)	ENSG00000149527.13	5699
chr1	2435124	2435430	3' UTR	ENSG00000149527.13	5038	chr1	2418817	2419072	Exon (ENST00000449969.1/ENSG00000149527.13, exon 8 of 22)	ENSG00000224387.1	5625
chr1	2435732	2436091	3' UTR	ENSG00000149527.13	5646	chr1	2419335	2420033	Intron (ENST00000449969.1/ENSG00000149527.13, intron 8 of 21)	ENSG00000224387.1	4664
chr1	2436902	2437264	3' UTR	ENSG00000149527.13	6816	chr1	2420760	2421300	Exon (ENST00000449969.1/ENSG00000149527.13, exon 9 of 22)	ENSG00000224387.1	3397
chr1	2438249	2439997	3' UTR	ENSG00000157881.9	4455	chr1	2421644	2422401	Intron (ENST00000449969.1/ENSG00000149527.13, intron 10 of 21)	ENSG00000224387.1	2296
chr1	2442017	2445419	Promoter	ENSG00000157881.9	0	chr1	2422791	2423433	Intron (ENST00000449969.1/ENSG00000149527.13, intron 11 of 21)	ENSG00000224387.1	1264
chr1	2446554	2447080	Promoter	ENSG00000157881.9	296	chr1	2423690	2423964	Promoter	ENSG00000224387.1	733
chr1	2447320	2447623	Promoter	ENSG00000157881.9	0	chr1	2424466	2424984	Promoter	ENSG00000224387.1	0
chr1	2448795	2449233	Intron (ENST00000378466.3/ENSG00000157881.9, intron 9 of 18)	ENSG00000157881.9	-1419	chr1	2425861	2426076	Promoter	ENSG00000229393.1	0
chr1	2452070	2452453	Promoter	ENSG00000157881.9	0	chr1	2426353	2428044	Promoter	ENSG00000229393.1	-435
chr1	2452776	2453481	Promoter	ENSG00000157881.9	-436	chr1	2429274	2430413	Promoter	ENSG00000149527.13	0
chr1	2460374	2460729	Promoter	ENSG00000197921.5	955	chr1	2430648	2430863	Promoter	ENSG00000149527.13	562
chr1	2463002	2463546	Distal Intergenic	ENSG00000197921.5	-1318	chr1	2431103	2431369	Exon (ENST00000449969.1/ENSG00000149527.13, exon 20 of 22)	ENSG00000149527.13	1017
chr1	2463916	2464547	Distal Intergenic	ENSG00000197921.5	-2232	chr1	2431627	2432196	Exon (ENST00000473964.1/ENSG00000149527.13, exon 4 of 4)	ENSG00000149527.13	1541
chr1	2467040	2467769	Distal Intergenic	ENSG00000197921.5	-5356	chr1	2432370	2432777	Exon (ENST00000473964.1/ENSG00000149527.13, exon 4 of 4)	ENSG00000149527.13	2284
chr1	2468457	2468833	Distal Intergenic	ENSG00000197921.5	-6773	chr1	2433042	2433436	Exon (ENST00000473964.1/ENSG00000149527.13, exon 4 of 4)	ENSG00000149527.13	2956
chr1	2469037	2469469	Distal Intergenic	ENSG00000197921.5	-7353	chr1	2433690	2434414	Exon (ENST00000449969.1/ENSG00000149527.13, exon 21 of 22)	ENSG00000149527.13	3604
chr1	2470326	2470686	Distal Intergenic	ENSG00000272449.1	-7218	chr1	2434767	2434982	Exon (ENST00000343889.4/ENSG00000149527.13, exon 19 of 19)	ENSG00000149527.13	4681
chr1	2471295	2471930	Distal Intergenic	ENSG00000272449.1	-5974	chr1	2435681	2436217	3' UTR	ENSG00000149527.13	5595
chr1	2472314	2472627	Distal Intergenic	ENSG00000272449.1	-5277	chr1	2437185	2437762	Downstream (<=300bp)	ENSG00000157881.9	6690
chr1	2473290	2473878	Distal Intergenic	ENSG00000272449.1	-4026	chr1	2438083	2439943	Distal Intergenic	ENSG00000157881.9	4509
chr1	2475483	2475840	Distal Intergenic	ENSG00000272449.1	-2064	chr1	2440104	2441157	3' UTR	ENSG00000157881.9	3295
chr1	2483677	2484121	Promoter	ENSG00000238164.2	-132	chr1	2441567	2442008	3' UTR	ENSG00000157881.9	2444
chr1	2485563	2485892	Promoter	ENSG00000238164.2	0	chr1	2442279	2442792	Exon (ENST00000378466.3/ENSG00000157881.9, exon 15 of 19)	ENSG00000157881.9	1660
chr1	2486436	2487536	Promoter	ENSG00000157873.13	0	chr1	2444613	2445779	Promoter	ENSG00000157881.9	0
chr1	2488271	2490250	Promoter	ENSG00000157873.13	0	chr1	2446352	2446618	Promoter	ENSG00000157881.9	-510
chr1	2491005	2491600	Promoter	ENSG00000157873.13	0	chr1	2446767	2447102	Promoter	ENSG00000157881.9	274
chr1	2491927	2492261	Promoter	ENSG00000157873.13	0	chr1	2447332	2447643	Promoter	ENSG00000157881.9	0
chr1	2494555	2494972	3' UTR	ENSG00000157873.13	1315	chr1	2447964	2448257	Promoter	ENSG00000157881.9	-588
chr1	2495872	2496875	Promoter	ENSG00000225931.3	-974	chr1	2448780	2449176	Intron (ENST00000378466.3/ENSG00000157881.9, intron 9 of 18)	ENSG00000157881.9	-1404
chr1	2497916	2498156	Promoter	ENSG00000225931.3	67	chr1	2449484	2449908	Promoter	ENSG00000157881.9	826
chr1	2498553	2499015	Promoter	ENSG00000225931.3	704	chr1	2451200	2451447	Promoter	ENSG00000157881.9	-466
chr1	2500392	2500853	Exon (ENST00000456687.3/ENSG00000225931.3, exon 3 of 3)	ENSG00000225931.3	2543	chr1	2452187	2452664	Promoter	ENSG00000157881.9	0
chr1	2501472	2501755	Downstream (<=300bp)	ENSG00000225931.3	3623	chr1	2458538	2459936	Promoter	ENSG00000157881.9	-499
chr1	2501932	2502393	Distal Intergenic	ENSG00000225931.3	4083	chr1	2460161	2460697	Promoter	ENSG00000197921.5	987
chr1	2506015	2506678	Distal Intergenic	ENSG00000228037.1	-6321	chr1	2463536	2464756	Distal Intergenic	ENSG00000197921.5	-1852
chr1	2507230	2507745	Distal Intergenic	ENSG00000228037.1	-5254	chr1	2465632	2465847	Distal Intergenic	ENSG00000197921.5	-3948
chr1	2508040	2508504	Distal Intergenic	ENSG00000228037.1	-4495	chr1	2466896	2467355	Distal Intergenic	ENSG00000197921.5	-5212
chr1	2512112	2512647	Promoter	ENSG00000228037.1	-352	chr1	2467522	2467782	Distal Intergenic	ENSG00000197921.5	-5838
chr1	2514265	2515161	Exon (ENST00000424215.1/ENSG00000228037.1, exon 2 of 3)	ENSG00000228037.1	1266	chr1	2468175	2468584	Distal Intergenic	ENSG00000197921.5	-6491
chr1	2518824	2519064	Promoter	ENSG00000157870.10	300	chr1	2469238	2469964	Distal Intergenic	ENSG00000197921.5	-7554
chr1	2520846	2521217	Promoter	ENSG00000157870.10	813	chr1	2470996	2471431	Distal Intergenic	ENSG00000272449.1	-6473
chr1	2521423	2522670	3' UTR	ENSG00000157870.10	1390	chr1	2471730	2472037	Distal Intergenic	ENSG00000272449.1	-5867
chr1	2524389	2525326	Promoter	ENSG00000142606.11	-71	chr1	2473414	2474043	Distal Intergenic	ENSG00000272449.1	-3861
chr1	2525686	2526187	Promoter	ENSG00000142606.11	-174	chr1	2474411	2474996	Distal Intergenic	ENSG00000272449.1	-2908
chr1	2527026	2530037	Exon (ENST00000288709.6/ENSG00000142606.11, exon 13 of 24)	ENSG00000142606.11	-1514	chr1	2475561	2476040	Distal Intergenic	ENSG00000272449.1	-1864
chr1	2534502	2535635	Exon (ENST00000288709.6/ENSG00000142606.11, exon 10 of 24)	ENSG00000142606.11	7205	chr1	2476283	2476536	Distal Intergenic	ENSG00000272449.1	-1368
chr1	2536168	2536408	Intron (ENST00000288709.6/ENSG00000142606.11, intron 9 of 23)	ENSG00000142606.11	6432	chr1	2481315	2481540	Exon (ENST00000449660.1/ENSG00000238164.2, exon 3 of 3)	ENSG00000238164.2	1497
chr1	2537385	2537790	Exon (ENST00000288709.6/ENSG00000142606.11, exon 8 of 24)	ENSG00000142606.11	5050	chr1	2482088	2482540	Promoter	ENSG00000238164.2	497
chr1	2537950	2539652	Exon (ENST00000288709.6/ENSG00000142606.11, exon 7 of 24)	ENSG00000142606.11	3188	chr1	2483876	2484091	Promoter	ENSG00000238164.2	-331
chr1	2541432	2541818	Intron (ENST00000288709.6/ENSG00000142606.11, intron 4 of 23)	ENSG00000142606.11	1022	chr1	2485335	2486121	Promoter	ENSG00000238164.2	0
chr1	2542954	2544572	Promoter	ENSG00000142606.11	-114	chr1	2486509	2486916	Promoter	ENSG00000157873.13	-162
chr1	2544764	2545029	Intron (ENST00000288709.6/ENSG00000142606.11, intron 2 of 23)	ENSG00000142606.11	-1924	chr1	2487696	2488109	Promoter	ENSG00000157873.13	0
chr1	2552863	2553286	Intron (ENST00000288709.6/ENSG00000142606.11, intron 2 of 23)	ENSG00000142606.11	7647	chr1	2488328	2489396	Promoter	ENSG00000157873.13	0
chr1	2557189	2558166	Intron (ENST00000288709.6/ENSG00000142606.11, intron 2 of 23)	ENSG00000142606.11	2767	chr1	2489693	2490763	Promoter	ENSG00000157873.13	-256
chr1	2559659	2559899	Intron (ENST00000288709.6/ENSG00000142606.11, intron 2 of 23)	ENSG00000142606.11	1034	chr1	2490962	2491575	Promoter	ENSG00000157873.13	0
chr1	2561573	2561884	Promoter	ENSG00000142606.11	-640	chr1	2492228	2492642	Promoter	ENSG00000157873.13	107
chr1	2563050	2563477	Promoter	ENSG00000237058.1	-530	chr1	2492978	2493285	Promoter	ENSG00000157873.13	0
chr1	2563795	2564304	Promoter	ENSG00000237058.1	0	chr1	2493976	2494621	Promoter	ENSG00000157873.13	736
chr1	2564475	2564776	Promoter	ENSG00000142606.11	0	chr1	2495590	2496229	Intron (ENST00000482602.2/ENSG00000157873.13, intron 3 of 3)	ENSG00000225931.3	-1620
chr1	2565363	2565779	Promoter	ENSG00000142606.11	-882	chr1	2500486	2501002	Exon (ENST00000456687.3/ENSG00000225931.3, exon 3 of 3)	ENSG00000225931.3	2637
chr1	2566593	2566900	Intron (ENST00000427302.1/ENSG00000237058.1, intron 1 of 1)	ENSG00000142606.11	-2112	chr1	2506999	2507248	Distal Intergenic	ENSG00000228037.1	-5751
chr1	2567865	2568416	3' UTR	ENSG00000215912.7	2735	chr1	2514142	2514566	Intron (ENST00000424215.1/ENSG00000228037.1, intron 1 of 2)	ENSG00000228037.1	1143
chr1	2569704	2569944	Exon (ENST00000579787.1/ENSG00000215912.7, exon 1 of 1)	ENSG00000215912.7	1207	chr1	2519790	2520005	Promoter	ENSG00000157870.10	-28
chr1	2570748	2571876	Promoter	ENSG00000215912.7	0	chr1	2520372	2520587	Promoter	ENSG00000157870.10	339
chr1	2573304	2573748	Exon (ENST00000401094.6/ENSG00000215912.7, exon 7 of 9)	ENSG00000215912.7	-2153	chr1	2520850	2521202	Promoter	ENSG00000157870.10	817
chr1	2575917	2577319	Exon (ENST00000401094.6/ENSG00000215912.7, exon 5 of 9)	ENSG00000215912.7	-4766	chr1	2521937	2522955	3' UTR	ENSG00000142606.11	1162
chr1	2581979	2582219	Intron (ENST00000401094.6/ENSG00000215912.7, intron 4 of 8)	ENSG00000215912.7	-10828	chr1	2524175	2525120	Promoter	ENSG00000142606.11	0
chr1	2582749	2582989	Intron (ENST00000401094.6/ENSG00000215912.7, intron 4 of 8)	ENSG00000215912.7	-11598	chr1	2526188	2526721	Promoter	ENSG00000142606.11	-676
chr1	2583633	2583934	Intron (ENST00000401094.6/ENSG00000215912.7, intron 4 of 8)	ENSG00000215912.7	-12482	chr1	2526881	2527193	Intron (ENST00000288709.6/ENSG00000142606.11, intron 15 of 23)	ENSG00000142606.11	-1369
chr1	2584174	2584967	Intron (ENST00000401094.6/ENSG00000215912.7, intron 4 of 8)	ENSG00000215912.7	-13023	chr1	2527478	2528145	Exon (ENST00000288709.6/ENSG00000142606.11, exon 14 of 24)	ENSG00000142606.11	-1966
chr1	2585183	2586546	Intron (ENST00000401094.6/ENSG00000215912.7, intron 4 of 8)	ENSG00000215912.7	-14032	chr1	2528424	2529638	Intron (ENST00000288709.6/ENSG00000142606.11, intron 13 of 23)	ENSG00000142606.11	-2912
chr1	2586882	2587769	Intron (ENST00000401094.6/ENSG00000215912.7, intron 4 of 8)	ENSG00000215912.7	-15731	chr1	2529916	2530176	Exon (ENST00000288709.6/ENSG00000142606.11, exon 12 of 24)	ENSG00000142606.11	-4404
chr1	2615117	2616636	Intron (ENST00000401094.6/ENSG00000215912.7, intron 4 of 8)	ENSG00000215912.7	-43966	chr1	2533476	2534264	Intron (ENST00000288709.6/ENSG00000142606.11, intron 11 of 23)	ENSG00000142606.11	-7964
chr1	2618597	2619733	Intron (ENST00000401094.6/ENSG00000215912.7, intron 4 of 8)	ENSG00000215912.7	-47446	chr1	2534531	2534987	Intron (ENST00000288709.6/ENSG00000142606.11, intron 11 of 23)	ENSG00000142606.11	7853
chr1	2620222	2620478	Intron (ENST00000401094.6/ENSG00000215912.7, intron 4 of 8)	ENSG00000215912.7	-49071	chr1	2535599	2536010	Exon (ENST00000288709.6/ENSG00000142606.11, exon 10 of 24)	ENSG00000142606.11	6830
chr1	2621039	2622472	Intron (ENST00000401094.6/ENSG00000215912.7, intron 4 of 8)	ENSG00000215912.7	-49888	chr1	2536363	2537169	Exon (ENST00000288709.6/ENSG00000142606.11, exon 9 of 24)	ENSG00000142606.11	5671
chr1	2622846	2623212	Intron (ENST00000401094.6/ENSG00000215912.7, intron 4 of 8)	ENSG00000215912.7	-51695	chr1	2537882	2538256	Intron (ENST00000288709.6/ENSG00000142606.11, intron 7 of 23)	ENSG00000142606.11	4584
chr1	2626325	2627345	Intron (ENST00000401094.6/ENSG00000215912.7, intron 4 of 8)	ENSG00000215912.7	-55174	chr1	2539109	2539401	Intron (ENST00000288709.6/ENSG00000142606.11, intron 6 of 23)	ENSG00000142606.11	3439
chr1	2627498	2629892	Intron (ENST00000401094.6/ENSG00000215912.7, intron 4 of 8)	ENSG00000215912.7	-56347	chr1	2540738	2541371	Exon (ENST00000288709.6/ENSG00000142606.11, exon 5 of 24)	ENSG00000142606.11	1469
chr1	2630048	2630637	Intron (ENST00000401094.6/ENSG00000215912.7, intron 4 of 8)	ENSG00000215912.7	-58897	chr1	2541767	2542190	Promoter	ENSG00000142606.11	650
chr1	2630823	2631963	Intron (ENST00000401094.6/ENSG00000215912.7, intron 4 of 8)	ENSG00000215912.7	-59672	chr1	2543707	2544904	Promoter	ENSG00000142606.11	-867
chr1	2688000	2689066	Intron (ENST00000401094.6/ENSG00000215912.7, intron 4 of 8)	ENSG00000215912.7	17170	chr1	2546121	2546341	Intron (ENST00000288709.6/ENSG00000142606.11, intron 2 of 23)	ENSG00000142606.11	-3281
chr1	2691825	2692163	Intron (ENST00000401094.6/ENSG00000215912.7, intron 4 of 8)	ENSG00000215912.7	14073	chr1	2546705	2546920	Intron (ENST00000288709.6/ENSG00000142606.11, intron 2 of 23)	ENSG00000142606.11	-3865
chr1	2694047	2694287	Intron (ENST00000401094.6/ENSG00000215912.7, intron 4 of 8)	ENSG00000215912.7	11949	chr1	2555315	2555638	Intron (ENST00000288709.6/ENSG00000142606.11, intron 2 of 23)	ENSG00000142606.11	5295
chr1	2695956	2696341	Intron (ENST00000401094.6/ENSG00000215912.7, intron 4 of 8)	ENSG00000215912.7	9895	chr1	2559131	2559670	Intron (ENST00000288709.6/ENSG00000142606.11, intron 2 of 23)	ENSG00000142606.11	1263
chr1	2701676	2702405	5' UTR	ENSG00000215912.7	3831	chr1	2561158	2562300	Promoter	ENSG00000142606.11	-225
chr1	2702711	2703059	Intron (ENST00000401094.6/ENSG00000215912.7, intron 2 of 8)	ENSG00000215912.7	3177	chr1	2562469	2562684	Intron (ENST00000288709.6/ENSG00000142606.11, intron 1 of 23)	ENSG00000237058.1	-1323
chr1	2704311	2704573	Intron (ENST00000401094.6/ENSG00000215912.7, intron 2 of 8)	ENSG00000215912.7	1663	chr1	2563018	2563521	Promoter	ENSG00000237058.1	-486
chr1	2712902	2713202	Intron (ENST00000401094.6/ENSG00000215912.7, intron 2 of 8)	ENSG00000215912.7	5084	chr1	2565214	2565581	Promoter	ENSG00000142606.11	-733
chr1	2713554	2714177	Intron (ENST00000401094.6/ENSG00000215912.7, intron 2 of 8)	ENSG00000215912.7	4109	chr1	2565787	2566018	Intron (ENST00000427302.1/ENSG00000237058.1, intron 1 of 1)	ENSG00000142606.11	-1306
chr1	2715317	2715557	Intron (ENST00000401094.6/ENSG00000215912.7, intron 2 of 8)	ENSG00000215912.7	2729	chr1	2569177	2569392	Exon (ENST00000579787.1/ENSG00000215912.7, exon 1 of 1)	ENSG00000215912.7	1759
chr1	2716921	2717742	Promoter	ENSG00000215912.7	544	chr1	2570076	2570399	Promoter	ENSG00000215912.7	752
chr1	2717980	2718220	Promoter	ENSG00000215912.7	66	chr1	2571733	2571948	Promoter	ENSG00000215912.7	-582
chr1	2718549	2719015	Promoter	ENSG00000215912.7	-263	chr1	2572782	2573022	3' UTR	ENSG00000215912.7	-1631
chr1	2719249	2720167	Promoter	ENSG00000215912.7	-963	chr1	2575205	2575916	Exon (ENST00000401094.6/ENSG00000215912.7, exon 6 of 9)	ENSG00000215912.7	-4054
chr1	2720549	2722884	Distal Intergenic	ENSG00000215912.7	-2263	chr1	2576698	2577206	Exon (ENST00000401094.6/ENSG00000215912.7, exon 5 of 9)	ENSG00000215912.7	-5547
chr1	2723974	2724293	Distal Intergenic	ENSG00000233234.1	4964	chr1	2584084	2586527	Intron (ENST00000401094.6/ENSG00000215912.7, intron 4 of 8)	ENSG00000215912.7	-12933
chr1	2724819	2726324	Distal Intergenic	ENSG00000233234.1	2933	chr1	2586938	2587731	Intron (ENST00000401094.6/ENSG00000215912.7, intron 4 of 8)	ENSG00000215912.7	-15787
chr1	2728121	2728879	Promoter	ENSG00000233234.1	378	chr1	2591294	2591509	Intron (ENST00000401094.6/ENSG00000215912.7, intron 4 of 8)	ENSG00000215912.7	-20143
chr1	2730121	2730361	Promoter	ENSG00000233234.1	-864	chr1	2614827	2615798	Intron (ENST00000401094.6/ENSG00000215912.7, intron 4 of 8)	ENSG00000215912.7	-43676
chr1	2731613	2731899	Promoter	ENSG00000231630.1	-50	chr1	2616003	2616650	Intron (ENST00000401094.6/ENSG00000215912.7, intron 4 of 8)	ENSG00000215912.7	-44852
chr1	2736014	2736410	Distal Intergenic	ENSG00000231630.1	-4451	chr1	2618484	2619039	Intron (ENST00000401094.6/ENSG00000215912.7, intron 4 of 8)	ENSG00000215912.7	-47333
chr1	2737477	2737947	Distal Intergenic	ENSG00000231630.1	-5914	chr1	2619219	2622024	Intron (ENST00000401094.6/ENSG00000215912.7, intron 4 of 8)	ENSG00000215912.7	-48068
chr1	2738745	2739285	Distal Intergenic	ENSG00000231630.1	-7182	chr1	2622236	2623710	Intron (ENST00000401094.6/ENSG00000215912.7, intron 4 of 8)	ENSG00000215912.7	-51085
chr1	2742523	2745048	Distal Intergenic	ENSG00000231630.1	-10960	chr1	2623973	2624353	Intron (ENST00000401094.6/ENSG00000215912.7, intron 4 of 8)	ENSG00000215912.7	-52822
chr1	2745233	2745629	Distal Intergenic	ENSG00000231630.1	-13670	chr1	2624841	2625143	Intron (ENST00000401094.6/ENSG00000215912.7, intron 4 of 8)	ENSG00000215912.7	-53690
chr1	2745899	2746139	Distal Intergenic	ENSG00000231630.1	-14336	chr1	2625381	2625596	Intron (ENST00000401094.6/ENSG00000215912.7, intron 4 of 8)	ENSG00000215912.7	-54230
chr1	2746339	2746783	Distal Intergenic	ENSG00000231630.1	-14776	chr1	2626315	2627505	Intron (ENST00000401094.6/ENSG00000215912.7, intron 4 of 8)	ENSG00000215912.7	-55164
chr1	2748406	2749134	Distal Intergenic	ENSG00000231630.1	-16843	chr1	2627779	2629402	Intron (ENST00000401094.6/ENSG00000215912.7, intron 4 of 8)	ENSG00000215912.7	-56628
chr1	2749550	2750027	Distal Intergenic	ENSG00000231630.1	-17987	chr1	2629654	2630222	Intron (ENST00000401094.6/ENSG00000215912.7, intron 4 of 8)	ENSG00000215912.7	-58503
chr1	2751215	2751586	Distal Intergenic	ENSG00000231630.1	-19652	chr1	2630664	2630879	Intron (ENST00000401094.6/ENSG00000215912.7, intron 4 of 8)	ENSG00000215912.7	-59513
chr1	2751796	2752036	Distal Intergenic	ENSG00000231630.1	-20233	chr1	2631057	2631966	Intron (ENST00000401094.6/ENSG00000215912.7, intron 4 of 8)	ENSG00000215912.7	-59906
chr1	2752216	2752780	Distal Intergenic	ENSG00000231630.1	-20653	chr1	2687714	2689861	Intron (ENST00000401094.6/ENSG00000215912.7, intron 4 of 8)	ENSG00000215912.7	16375
chr1	2754083	2754323	Distal Intergenic	ENSG00000231630.1	-22520	chr1	2691749	2691987	Intron (ENST00000401094.6/ENSG00000215912.7, intron 4 of 8)	ENSG00000215912.7	14249
chr1	2756092	2756601	Distal Intergenic	ENSG00000231630.1	-24529	chr1	2693933	2694422	Intron (ENST00000401094.6/ENSG00000215912.7, intron 4 of 8)	ENSG00000215912.7	11814
chr1	2763317	2764245	Distal Intergenic	ENSG00000231630.1	-31754	chr1	2700587	2700982	Intron (ENST00000401094.6/ENSG00000215912.7, intron 3 of 8)	ENSG00000215912.7	5254
chr1	2764511	2765581	Distal Intergenic	ENSG00000231630.1	-32948	chr1	2701707	2702606	5' UTR	ENSG00000215912.7	3630
chr1	2765839	2766616	Distal Intergenic	ENSG00000231630.1	-34276	chr1	2703954	2704479	Exon (ENST00000401095.3/ENSG00000215912.7, exon 2 of 7)	ENSG00000215912.7	1757
chr1	2771148	2771822	Distal Intergenic	ENSG00000231630.1	-39585	chr1	2704740	2705017	Intron (ENST00000401094.6/ENSG00000215912.7, intron 2 of 8)	ENSG00000215912.7	1219
chr1	2772318	2772877	Distal Intergenic	ENSG00000231630.1	-40755	chr1	2706951	2707387	Promoter	ENSG00000215912.7	-671
chr1	2774596	2775509	Distal Intergenic	ENSG00000231630.1	-43033	chr1	2712360	2712714	Intron (ENST00000401094.6/ENSG00000215912.7, intron 2 of 8)	ENSG00000215912.7	5572
chr1	2777109	2777581	Distal Intergenic	ENSG00000231630.1	-45546	chr1	2712949	2713202	Intron (ENST00000401094.6/ENSG00000215912.7, intron 2 of 8)	ENSG00000215912.7	5084
chr1	2777921	2778791	Distal Intergenic	ENSG00000231630.1	-46358	chr1	2717179	2718058	Promoter	ENSG00000215912.7	228
chr1	2779176	2779746	Distal Intergenic	ENSG00000231630.1	-47613	chr1	2718791	2719225	Promoter	ENSG00000215912.7	-505
chr1	2781466	2781880	Distal Intergenic	ENSG00000231630.1	-49903	chr1	2719419	2719768	Distal Intergenic	ENSG00000215912.7	-1133
chr1	2782039	2782890	Distal Intergenic	ENSG00000231630.1	-50476	chr1	2720039	2720566	Distal Intergenic	ENSG00000215912.7	-1753
chr1	2783101	2784928	Distal Intergenic	ENSG00000231630.1	-51538	chr1	2720732	2721495	Distal Intergenic	ENSG00000215912.7	-2446
chr1	2785101	2785626	Distal Intergenic	ENSG00000231630.1	-53538	chr1	2722159	2722374	Distal Intergenic	ENSG00000215912.7	-3873
chr1	2785911	2786520	Distal Intergenic	ENSG00000231630.1	-54348	chr1	2722547	2723153	Distal Intergenic	ENSG00000215912.7	-4261
chr1	2787865	2788119	Distal Intergenic	ENSG00000231630.1	-56302	chr1	2724472	2725731	Distal Intergenic	ENSG00000233234.1	3526
chr1	2788453	2788951	Distal Intergenic	ENSG00000231630.1	-56890	chr1	2725911	2726350	Distal Intergenic	ENSG00000233234.1	2907
chr1	2791077	2791653	Distal Intergenic	ENSG00000231630.1	-59514	chr1	2727046	2727315	Distal Intergenic	ENSG00000233234.1	1942
chr1	2792460	2793037	Distal Intergenic	ENSG00000231630.1	-60897	chr1	2727761	2728072	Distal Intergenic	ENSG00000233234.1	1185
chr1	2793254	2794033	Distal Intergenic	ENSG00000231630.1	-61691	chr1	2729497	2729799	Promoter	ENSG00000233234.1	-240
chr1	2794211	2794927	Distal Intergenic	ENSG00000231630.1	-62648	chr1	2730000	2730297	Promoter	ENSG00000233234.1	-743
chr1	2795372	2795912	Distal Intergenic	ENSG00000231630.1	-63809	chr1	2732248	2732572	Promoter	ENSG00000231630.1	-685
chr1	2796098	2797939	Distal Intergenic	ENSG00000231630.1	-64535	chr1	2735313	2735610	Distal Intergenic	ENSG00000231630.1	-3750
chr1	2798327	2799018	Distal Intergenic	ENSG00000231630.1	-66764	chr1	2736763	2737773	Distal Intergenic	ENSG00000231630.1	-5200
chr1	2800137	2803018	Distal Intergenic	ENSG00000231630.1	-68574	chr1	2738132	2738467	Distal Intergenic	ENSG00000231630.1	-6569
chr1	2804554	2805726	Distal Intergenic	ENSG00000231630.1	-72991	chr1	2738661	2739814	Distal Intergenic	ENSG00000231630.1	-7098
chr1	2806022	2806414	Distal Intergenic	ENSG00000231630.1	-74459	chr1	2740078	2740554	Distal Intergenic	ENSG00000231630.1	-8515
chr1	2806658	2807325	Distal Intergenic	ENSG00000231630.1	-75095	chr1	2740890	2741121	Distal Intergenic	ENSG00000231630.1	-9327
chr1	2808608	2808848	Distal Intergenic	ENSG00000231630.1	-77045	chr1	2742459	2742917	Distal Intergenic	ENSG00000231630.1	-10896
chr1	2809038	2809317	Distal Intergenic	ENSG00000231630.1	-77475	chr1	2744073	2744547	Distal Intergenic	ENSG00000231630.1	-12510
chr1	2809837	2810102	Distal Intergenic	ENSG00000231630.1	-78274	chr1	2747333	2747725	Distal Intergenic	ENSG00000231630.1	-15770
chr1	2810794	2811226	Distal Intergenic	ENSG00000231630.1	-79231	chr1	2748396	2748773	Distal Intergenic	ENSG00000231630.1	-16833
chr1	2811771	2812841	Distal Intergenic	ENSG00000231630.1	-80208	chr1	2749148	2749703	Distal Intergenic	ENSG00000231630.1	-17585
chr1	2815100	2815710	Distal Intergenic	ENSG00000231630.1	-83537	chr1	2751183	2752441	Distal Intergenic	ENSG00000231630.1	-19620
chr1	2815861	2816103	Distal Intergenic	ENSG00000231630.1	-84298	chr1	2762383	2762675	Distal Intergenic	ENSG00000231630.1	-30820
chr1	2816296	2817083	Distal Intergenic	ENSG00000231630.1	-84733	chr1	2764866	2765081	Distal Intergenic	ENSG00000231630.1	-33303
chr1	2817684	2818508	Distal Intergenic	ENSG00000231630.1	-86121	chr1	2766044	2766295	Distal Intergenic	ENSG00000231630.1	-34481
chr1	2819245	2820046	Distal Intergenic	ENSG00000231630.1	-87682	chr1	2766509	2767046	Distal Intergenic	ENSG00000231630.1	-34946
chr1	2820633	2821438	Distal Intergenic	ENSG00000231630.1	-89070	chr1	2769456	2769992	Distal Intergenic	ENSG00000231630.1	-37893
chr1	2822221	2822686	Distal Intergenic	ENSG00000231630.1	-90658	chr1	2770811	2771284	Distal Intergenic	ENSG00000231630.1	-39248
chr1	2824630	2825018	Distal Intergenic	ENSG00000231630.1	-93067	chr1	2773003	2774075	Distal Intergenic	ENSG00000231630.1	-41440
chr1	2828320	2828873	Distal Intergenic	ENSG00000231630.1	-96757	chr1	2775387	2775609	Distal Intergenic	ENSG00000231630.1	-43824
chr1	2829598	2829882	Distal Intergenic	ENSG00000231630.1	-98035	chr1	2777090	2777435	Distal Intergenic	ENSG00000231630.1	-45527
chr1	2830309	2830915	Distal Intergenic	ENSG00000231630.1	-98746	chr1	2778121	2778702	Distal Intergenic	ENSG00000231630.1	-46558
chr1	2831337	2832395	Distal Intergenic	ENSG00000231630.1	-99774	chr1	2779282	2779522	Distal Intergenic	ENSG00000231630.1	-47719
chr1	2832813	2833500	Distal Intergenic	ENSG00000231630.1	-101250	chr1	2780961	2782106	Distal Intergenic	ENSG00000231630.1	-49398
chr1	2834588	2834920	Distal Intergenic	ENSG00000231630.1	-103025	chr1	2782264	2782643	Distal Intergenic	ENSG00000231630.1	-50701
chr1	2835202	2835642	Distal Intergenic	ENSG00000169717.5	-102404	chr1	2782985	2783325	Distal Intergenic	ENSG00000231630.1	-51422
chr1	2836380	2836622	Distal Intergenic	ENSG00000169717.5	-101424	chr1	2783658	2784074	Distal Intergenic	ENSG00000231630.1	-52095
chr1	2838779	2839180	Distal Intergenic	ENSG00000169717.5	-98866	chr1	2785858	2786142	Distal Intergenic	ENSG00000231630.1	-54295
chr1	2839957	2840536	Distal Intergenic	ENSG00000169717.5	-97510	chr1	2786369	2786645	Distal Intergenic	ENSG00000231630.1	-54806
chr1	2840881	2841773	Distal Intergenic	ENSG00000169717.5	-96273	chr1	2787352	2787567	Distal Intergenic	ENSG00000231630.1	-55789
chr1	2843643	2844083	Distal Intergenic	ENSG00000169717.5	-93963	chr1	2787969	2788741	Distal Intergenic	ENSG00000231630.1	-56406
chr1	2844329	2844827	Distal Intergenic	ENSG00000169717.5	-93219	chr1	2790242	2790731	Distal Intergenic	ENSG00000231630.1	-58679
chr1	2846621	2846894	Distal Intergenic	ENSG00000169717.5	-91152	chr1	2791197	2791544	Distal Intergenic	ENSG00000231630.1	-59634
chr1	2847145	2848449	Distal Intergenic	ENSG00000169717.5	-89597	chr1	2791912	2792306	Distal Intergenic	ENSG00000231630.1	-60349
chr1	2848765	2849332	Distal Intergenic	ENSG00000169717.5	-88714	chr1	2793113	2793794	Distal Intergenic	ENSG00000231630.1	-61550
chr1	2849790	2850335	Distal Intergenic	ENSG00000169717.5	-87711	chr1	2794478	2795146	Distal Intergenic	ENSG00000231630.1	-62915
chr1	2851422	2851957	Distal Intergenic	ENSG00000169717.5	-86089	chr1	2795485	2795714	Distal Intergenic	ENSG00000231630.1	-63922
chr1	2852698	2853083	Distal Intergenic	ENSG00000169717.5	-84963	chr1	2795947	2797349	Distal Intergenic	ENSG00000231630.1	-64384
chr1	2858531	2859261	Distal Intergenic	ENSG00000169717.5	-78785	chr1	2797597	2798155	Distal Intergenic	ENSG00000231630.1	-66034
chr1	2860859	2861236	Distal Intergenic	ENSG00000169717.5	-76810	chr1	2798397	2799680	Distal Intergenic	ENSG00000231630.1	-66834
chr1	2862108	2862522	Distal Intergenic	ENSG00000169717.5	-75524	chr1	2800423	2801184	Distal Intergenic	ENSG00000231630.1	-68860
chr1	2862932	2863221	Distal Intergenic	ENSG00000169717.5	-74825	chr1	2802059	2802653	Distal Intergenic	ENSG00000231630.1	-70496
chr1	2864853	2866009	Distal Intergenic	ENSG00000169717.5	-72037	chr1	2802950	2803692	Distal Intergenic	ENSG00000231630.1	-71387
chr1	2866627	2866867	Distal Intergenic	ENSG00000169717.5	-71179	chr1	2804003	2804249	Distal Intergenic	ENSG00000231630.1	-72440
chr1	2868155	2868395	Distal Intergenic	ENSG00000169717.5	-69651	chr1	2804444	2804785	Distal Intergenic	ENSG00000231630.1	-72881
chr1	2875971	2876222	Distal Intergenic	ENSG00000169717.5	-61824	chr1	2804948	2805769	Distal Intergenic	ENSG00000231630.1	-73385
chr1	2878858	2879930	Distal Intergenic	ENSG00000169717.5	-58116	chr1	2805993	2806234	Distal Intergenic	ENSG00000231630.1	-74430
chr1	2885599	2885856	Distal Intergenic	ENSG00000169717.5	-52190	chr1	2806732	2808251	Distal Intergenic	ENSG00000231630.1	-75169
chr1	2886886	2887594	Distal Intergenic	ENSG00000169717.5	-50452	chr1	2809491	2809760	Distal Intergenic	ENSG00000231630.1	-77928
chr1	2888009	2888397	Distal Intergenic	ENSG00000169717.5	-49649	chr1	2811080	2811622	Distal Intergenic	ENSG00000231630.1	-79517
chr1	2889061	2889383	Distal Intergenic	ENSG00000169717.5	-48663	chr1	2815235	2815601	Distal Intergenic	ENSG00000231630.1	-83672
chr1	2889582	2890459	Distal Intergenic	ENSG00000169717.5	-47587	chr1	2815853	2816545	Distal Intergenic	ENSG00000231630.1	-84290
chr1	2890862	2891164	Distal Intergenic	ENSG00000169717.5	-46882	chr1	2816767	2817303	Distal Intergenic	ENSG00000231630.1	-85204
chr1	2891970	2892435	Distal Intergenic	ENSG00000169717.5	-45611	chr1	2817707	2819211	Distal Intergenic	ENSG00000231630.1	-86144
chr1	2892729	2893090	Distal Intergenic	ENSG00000169717.5	-44956	chr1	2819466	2819786	Distal Intergenic	ENSG00000231630.1	-87903
chr1	2894703	2895820	Distal Intergenic	ENSG00000169717.5	-42226	chr1	2820122	2821442	Distal Intergenic	ENSG00000231630.1	-88559
chr1	2896442	2897288	Distal Intergenic	ENSG00000169717.5	-40758	chr1	2821681	2822515	Distal Intergenic	ENSG00000231630.1	-90118
chr1	2899383	2899918	Distal Intergenic	ENSG00000169717.5	-38128	chr1	2822898	2823180	Distal Intergenic	ENSG00000231630.1	-91335
chr1	2900440	2901271	Distal Intergenic	ENSG00000169717.5	-36775	chr1	2823726	2823968	Distal Intergenic	ENSG00000231630.1	-92163
chr1	2901511	2902483	Distal Intergenic	ENSG00000169717.5	-35563	chr1	2824555	2826011	Distal Intergenic	ENSG00000231630.1	-92992
chr1	2904226	2905149	Distal Intergenic	ENSG00000169717.5	-32897	chr1	2826445	2826952	Distal Intergenic	ENSG00000231630.1	-94882
chr1	2906459	2906867	Distal Intergenic	ENSG00000169717.5	-31179	chr1	2827849	2828064	Distal Intergenic	ENSG00000231630.1	-96286
chr1	2908268	2908579	Distal Intergenic	ENSG00000169717.5	-29467	chr1	2829471	2829815	Distal Intergenic	ENSG00000231630.1	-97908
chr1	2915782	2916183	Distal Intergenic	ENSG00000169717.5	-21863	chr1	2830118	2830482	Distal Intergenic	ENSG00000231630.1	-98555
chr1	2916580	2916861	Distal Intergenic	ENSG00000169717.5	-21185	chr1	2831132	2831722	Distal Intergenic	ENSG00000231630.1	-99569
chr1	2918226	2919518	Distal Intergenic	ENSG00000169717.5	-18528	chr1	2833219	2833434	Distal Intergenic	ENSG00000231630.1	-101656
chr1	2919980	2920329	Distal Intergenic	ENSG00000169717.5	-17717	chr1	2834790	2835135	Distal Intergenic	ENSG00000169717.5	-102911
chr1	2920965	2922051	Distal Intergenic	ENSG00000169717.5	-15995	chr1	2835622	2836760	Distal Intergenic	ENSG00000169717.5	-101286
chr1	2923080	2923561	Distal Intergenic	ENSG00000169717.5	-14485	chr1	2837422	2837637	Distal Intergenic	ENSG00000169717.5	-100409
chr1	2925989	2926347	Distal Intergenic	ENSG00000169717.5	-11699	chr1	2837992	2838207	Distal Intergenic	ENSG00000169717.5	-99839
chr1	2929423	2929702	Distal Intergenic	ENSG00000169717.5	-8344	chr1	2838810	2839152	Distal Intergenic	ENSG00000169717.5	-98894
chr1	2933624	2933947	Distal Intergenic	ENSG00000169717.5	-4099	chr1	2840385	2841193	Distal Intergenic	ENSG00000169717.5	-96853
chr1	2934103	2934680	Distal Intergenic	ENSG00000169717.5	-3366	chr1	2843883	2844417	Distal Intergenic	ENSG00000169717.5	-93629
chr1	2935244	2935642	Distal Intergenic	ENSG00000169717.5	-2404	chr1	2844933	2845148	Distal Intergenic	ENSG00000169717.5	-92898
chr1	2936086	2937593	Promoter	ENSG00000169717.5	-453	chr1	2846420	2846777	Distal Intergenic	ENSG00000169717.5	-91269
chr1	2938384	2938765	Promoter	ENSG00000169717.5	338	chr1	2847718	2847998	Distal Intergenic	ENSG00000169717.5	-90048
chr1	2939106	2939653	3' UTR	ENSG00000169717.5	1060	chr1	2848198	2848586	Distal Intergenic	ENSG00000169717.5	-89460
chr1	2941707	2942556	Distal Intergenic	ENSG00000169717.5	3661	chr1	2850184	2851130	Distal Intergenic	ENSG00000169717.5	-86916
chr1	2944574	2944820	Distal Intergenic	ENSG00000169717.5	6528	chr1	2851311	2851671	Distal Intergenic	ENSG00000169717.5	-86375
chr1	2945026	2945396	Distal Intergenic	ENSG00000169717.5	6980	chr1	2853180	2853699	Distal Intergenic	ENSG00000169717.5	-84347
chr1	2947154	2948430	Distal Intergenic	ENSG00000169717.5	9108	chr1	2854941	2855156	Distal Intergenic	ENSG00000169717.5	-82890
chr1	2949655	2950470	Distal Intergenic	ENSG00000169717.5	11609	chr1	2855351	2855899	Distal Intergenic	ENSG00000169717.5	-82147
chr1	2952063	2952630	Distal Intergenic	ENSG00000169717.5	14017	chr1	2856169	2856802	Distal Intergenic	ENSG00000169717.5	-81244
chr1	2953123	2953363	Distal Intergenic	ENSG00000169717.5	15077	chr1	2858409	2859362	Distal Intergenic	ENSG00000169717.5	-78684
chr1	2953962	2954982	Distal Intergenic	ENSG00000169717.5	15916	chr1	2860276	2860834	Distal Intergenic	ENSG00000169717.5	-77212
chr1	2955223	2955704	Distal Intergenic	ENSG00000169717.5	17177	chr1	2862516	2862757	Distal Intergenic	ENSG00000169717.5	-75289
chr1	2958099	2958433	Distal Intergenic	ENSG00000177133.6	19882	chr1	2865339	2865649	Distal Intergenic	ENSG00000169717.5	-72397
chr1	2965904	2966851	Distal Intergenic	ENSG00000177133.6	11464	chr1	2865874	2866110	Distal Intergenic	ENSG00000169717.5	-71936
chr1	2968948	2969983	Distal Intergenic	ENSG00000177133.6	8332	chr1	2866656	2867671	Distal Intergenic	ENSG00000169717.5	-70375
chr1	2973333	2973627	Distal Intergenic	ENSG00000177133.6	4688	chr1	2868195	2868410	Distal Intergenic	ENSG00000169717.5	-69636
chr1	2976784	2977024	Exon (ENST00000606861.1/ENSG00000177133.6, exon 1 of 1)	ENSG00000177133.6	1291	chr1	2869144	2869478	Distal Intergenic	ENSG00000169717.5	-68568
chr1	2977699	2978710	Promoter	ENSG00000177133.6	0	chr1	2876159	2876448	Distal Intergenic	ENSG00000169717.5	-61598
chr1	2983154	2983755	Promoter	ENSG00000177133.6	578	chr1	2877501	2878134	Distal Intergenic	ENSG00000169717.5	-59912
chr1	2988600	2989101	Intron (ENST00000511072.1/ENSG00000142611.12, intron 1 of 15)	ENSG00000142611.12	2825	chr1	2878308	2878532	Distal Intergenic	ENSG00000169717.5	-59514
chr1	2989419	2989848	Intron (ENST00000511072.1/ENSG00000142611.12, intron 1 of 15)	ENSG00000142611.12	3644	chr1	2878708	2879067	Distal Intergenic	ENSG00000169717.5	-58979
chr1	2993634	2994140	Intron (ENST00000511072.1/ENSG00000142611.12, intron 1 of 15)	ENSG00000142611.12	7859	chr1	2879284	2879500	Distal Intergenic	ENSG00000169717.5	-58546
chr1	2995582	2995822	Intron (ENST00000511072.1/ENSG00000142611.12, intron 1 of 15)	ENSG00000142611.12	9807	chr1	2881432	2881647	Distal Intergenic	ENSG00000169717.5	-56399
chr1	2996038	2996643	Intron (ENST00000511072.1/ENSG00000142611.12, intron 1 of 15)	ENSG00000142611.12	10263	chr1	2884173	2884830	Distal Intergenic	ENSG00000169717.5	-53216
chr1	2997721	2999391	Intron (ENST00000511072.1/ENSG00000142611.12, intron 1 of 15)	ENSG00000142611.12	11946	chr1	2885103	2885318	Distal Intergenic	ENSG00000169717.5	-52728
chr1	2999605	2999888	Intron (ENST00000511072.1/ENSG00000142611.12, intron 1 of 15)	ENSG00000142611.12	13830	chr1	2886359	2886600	Distal Intergenic	ENSG00000169717.5	-51446
chr1	3000165	3000999	Intron (ENST00000511072.1/ENSG00000142611.12, intron 1 of 15)	ENSG00000142611.12	14390	chr1	2887506	2887900	Distal Intergenic	ENSG00000169717.5	-50146
chr1	3002413	3003253	Intron (ENST00000511072.1/ENSG00000142611.12, intron 1 of 15)	ENSG00000142611.12	16638	chr1	2888665	2889720	Distal Intergenic	ENSG00000169717.5	-48326
chr1	3004070	3004876	Intron (ENST00000511072.1/ENSG00000142611.12, intron 1 of 15)	ENSG00000142611.12	18295	chr1	2890485	2890870	Distal Intergenic	ENSG00000169717.5	-47176
chr1	3006053	3006436	Intron (ENST00000511072.1/ENSG00000142611.12, intron 1 of 15)	ENSG00000142611.12	20278	chr1	2891386	2892841	Distal Intergenic	ENSG00000169717.5	-45205
chr1	3006874	3007931	Intron (ENST00000511072.1/ENSG00000142611.12, intron 1 of 15)	ENSG00000142611.12	21099	chr1	2894794	2895107	Distal Intergenic	ENSG00000169717.5	-42939
chr1	3008085	3008541	Intron (ENST00000511072.1/ENSG00000142611.12, intron 1 of 15)	ENSG00000142611.12	22310	chr1	2895406	2895621	Distal Intergenic	ENSG00000169717.5	-42425
chr1	3009163	3010441	Intron (ENST00000511072.1/ENSG00000142611.12, intron 1 of 15)	ENSG00000142611.12	23388	chr1	2896123	2896341	Distal Intergenic	ENSG00000169717.5	-41705
chr1	3010736	3011319	Intron (ENST00000511072.1/ENSG00000142611.12, intron 1 of 15)	ENSG00000142611.12	24961	chr1	2896807	2897263	Distal Intergenic	ENSG00000169717.5	-40783
chr1	3011800	3012231	Intron (ENST00000511072.1/ENSG00000142611.12, intron 1 of 15)	ENSG00000142611.12	26025	chr1	2898751	2899380	Distal Intergenic	ENSG00000169717.5	-38666
chr1	3013082	3013628	Intron (ENST00000511072.1/ENSG00000142611.12, intron 1 of 15)	ENSG00000142611.12	27307	chr1	2900139	2900545	Distal Intergenic	ENSG00000169717.5	-37501
chr1	3014182	3014880	Intron (ENST00000511072.1/ENSG00000142611.12, intron 1 of 15)	ENSG00000142611.12	28407	chr1	2900968	2901370	Distal Intergenic	ENSG00000169717.5	-36676
chr1	3015685	3016313	Intron (ENST00000511072.1/ENSG00000142611.12, intron 1 of 15)	ENSG00000142611.12	29910	chr1	2903338	2903576	Distal Intergenic	ENSG00000169717.5	-34470
chr1	3016900	3017303	Intron (ENST00000511072.1/ENSG00000142611.12, intron 1 of 15)	ENSG00000142611.12	31125	chr1	2903834	2904256	Distal Intergenic	ENSG00000169717.5	-33790
chr1	3018062	3018568	Intron (ENST00000511072.1/ENSG00000142611.12, intron 1 of 15)	ENSG00000226286.1	31705	chr1	2904710	2905173	Distal Intergenic	ENSG00000169717.5	-32873
chr1	3019157	3019994	Intron (ENST00000511072.1/ENSG00000142611.12, intron 1 of 15)	ENSG00000226286.1	30279	chr1	2906873	2907192	Distal Intergenic	ENSG00000169717.5	-30854
chr1	3020456	3021902	Intron (ENST00000511072.1/ENSG00000142611.12, intron 1 of 15)	ENSG00000226286.1	28371	chr1	2916988	2917204	Distal Intergenic	ENSG00000169717.5	-20842
chr1	3022645	3022957	Intron (ENST00000511072.1/ENSG00000142611.12, intron 1 of 15)	ENSG00000226286.1	27316	chr1	2917887	2918610	Distal Intergenic	ENSG00000169717.5	-19436
chr1	3023278	3023705	Intron (ENST00000511072.1/ENSG00000142611.12, intron 1 of 15)	ENSG00000226286.1	26568	chr1	2919892	2920229	Distal Intergenic	ENSG00000169717.5	-17817
chr1	3027461	3027900	Intron (ENST00000511072.1/ENSG00000142611.12, intron 1 of 15)	ENSG00000226286.1	22373	chr1	2921080	2921825	Distal Intergenic	ENSG00000169717.5	-16221
chr1	3028411	3028738	Intron (ENST00000511072.1/ENSG00000142611.12, intron 1 of 15)	ENSG00000226286.1	21535	chr1	2924022	2924490	Distal Intergenic	ENSG00000169717.5	-13556
chr1	3029612	3030547	Intron (ENST00000511072.1/ENSG00000142611.12, intron 1 of 15)	ENSG00000226286.1	19726	chr1	2927787	2928163	Distal Intergenic	ENSG00000169717.5	-9883
chr1	3031449	3031887	Intron (ENST00000511072.1/ENSG00000142611.12, intron 1 of 15)	ENSG00000226286.1	18386	chr1	2928682	2928915	Distal Intergenic	ENSG00000169717.5	-9131
chr1	3032567	3032807	Intron (ENST00000511072.1/ENSG00000142611.12, intron 1 of 15)	ENSG00000226286.1	17466	chr1	2930249	2930639	Distal Intergenic	ENSG00000169717.5	-7407
chr1	3033989	3034364	Intron (ENST00000511072.1/ENSG00000142611.12, intron 1 of 15)	ENSG00000226286.1	15909	chr1	2931105	2932276	Distal Intergenic	ENSG00000169717.5	-5770
chr1	3034801	3035041	Intron (ENST00000511072.1/ENSG00000142611.12, intron 1 of 15)	ENSG00000226286.1	15232	chr1	2933648	2934354	Distal Intergenic	ENSG00000169717.5	-3692
chr1	3035340	3036553	Intron (ENST00000511072.1/ENSG00000142611.12, intron 1 of 15)	ENSG00000226286.1	13720	chr1	2936069	2936440	Distal Intergenic	ENSG00000169717.5	-1606
chr1	3036853	3037318	Intron (ENST00000511072.1/ENSG00000142611.12, intron 1 of 15)	ENSG00000226286.1	12955	chr1	2936755	2937015	Distal Intergenic	ENSG00000169717.5	-1031
chr1	3038387	3038993	Intron (ENST00000511072.1/ENSG00000142611.12, intron 1 of 15)	ENSG00000226286.1	11280	chr1	2937303	2937527	Promoter	ENSG00000169717.5	-519
chr1	3039274	3040566	Intron (ENST00000511072.1/ENSG00000142611.12, intron 1 of 15)	ENSG00000226286.1	9707	chr1	2938054	2939214	Promoter	ENSG00000169717.5	8
chr1	3042200	3042697	Intron (ENST00000511072.1/ENSG00000142611.12, intron 1 of 15)	ENSG00000226286.1	7576	chr1	2939479	2939972	Downstream (<=300bp)	ENSG00000169717.5	1433
chr1	3044128	3045077	Intron (ENST00000511072.1/ENSG00000142611.12, intron 1 of 15)	ENSG00000226286.1	5196	chr1	2943297	2943587	Distal Intergenic	ENSG00000169717.5	5251
chr1	3045257	3045661	Intron (ENST00000511072.1/ENSG00000142611.12, intron 1 of 15)	ENSG00000226286.1	4612	chr1	2944226	2945305	Distal Intergenic	ENSG00000169717.5	6180
chr1	3045898	3046181	Intron (ENST00000511072.1/ENSG00000142611.12, intron 1 of 15)	ENSG00000226286.1	4092	chr1	2946248	2946468	Distal Intergenic	ENSG00000169717.5	8202
chr1	3048908	3049157	Intron (ENST00000511072.1/ENSG00000142611.12, intron 1 of 15)	ENSG00000226286.1	1116	chr1	2946870	2947179	Distal Intergenic	ENSG00000169717.5	8824
chr1	3051440	3051802	Intron (ENST00000511072.1/ENSG00000142611.12, intron 1 of 15)	ENSG00000226286.1	-1167	chr1	2947466	2948253	Distal Intergenic	ENSG00000169717.5	9420
chr1	3053492	3054437	Intron (ENST00000511072.1/ENSG00000142611.12, intron 1 of 15)	ENSG00000226286.1	-3219	chr1	2948493	2948758	Distal Intergenic	ENSG00000169717.5	10447
chr1	3055324	3055621	Intron (ENST00000511072.1/ENSG00000142611.12, intron 1 of 15)	ENSG00000226286.1	-5051	chr1	2949335	2949587	Distal Intergenic	ENSG00000169717.5	11289
chr1	3056428	3056947	Intron (ENST00000511072.1/ENSG00000142611.12, intron 1 of 15)	ENSG00000226286.1	-6155	chr1	2950428	2951160	Distal Intergenic	ENSG00000169717.5	12382
chr1	3058539	3058931	Intron (ENST00000511072.1/ENSG00000142611.12, intron 1 of 15)	ENSG00000226286.1	-8266	chr1	2951523	2952046	Distal Intergenic	ENSG00000169717.5	13477
chr1	3059221	3060043	Intron (ENST00000511072.1/ENSG00000142611.12, intron 1 of 15)	ENSG00000226286.1	-8948	chr1	2953371	2953745	Distal Intergenic	ENSG00000169717.5	15325
chr1	3061635	3061910	Intron (ENST00000511072.1/ENSG00000142611.12, intron 1 of 15)	ENSG00000226286.1	-11362	chr1	2954001	2954813	Distal Intergenic	ENSG00000169717.5	15955
chr1	3062142	3062907	Intron (ENST00000511072.1/ENSG00000142611.12, intron 1 of 15)	ENSG00000226286.1	-11869	chr1	2955047	2955551	Distal Intergenic	ENSG00000169717.5	17001
chr1	3063291	3063971	Intron (ENST00000511072.1/ENSG00000142611.12, intron 1 of 15)	ENSG00000226286.1	-13018	chr1	2966494	2966902	Distal Intergenic	ENSG00000177133.6	11413
chr1	3064789	3065194	Intron (ENST00000511072.1/ENSG00000142611.12, intron 1 of 15)	ENSG00000226286.1	-14516	chr1	2967232	2967679	Distal Intergenic	ENSG00000177133.6	10636
chr1	3067589	3067940	Intron (ENST00000511072.1/ENSG00000142611.12, intron 1 of 15)	ENSG00000226286.1	-17316	chr1	2970365	2970580	Distal Intergenic	ENSG00000177133.6	7735
chr1	3068434	3068674	Intron (ENST00000511072.1/ENSG00000142611.12, intron 1 of 15)	ENSG00000226286.1	-18161	chr1	2970844	2971059	Distal Intergenic	ENSG00000177133.6	7256
chr1	3069063	3070106	Intron (ENST00000511072.1/ENSG00000142611.12, intron 1 of 15)	ENSG00000226286.1	-18790	chr1	2974768	2975216	Distal Intergenic	ENSG00000177133.6	3099
chr1	3071459	3071765	Intron (ENST00000511072.1/ENSG00000142611.12, intron 1 of 15)	ENSG00000226286.1	-21186	chr1	2979735	2979950	Promoter	ENSG00000177133.6	296
chr1	3072907	3073431	Intron (ENST00000511072.1/ENSG00000142611.12, intron 1 of 15)	ENSG00000226286.1	-22634	chr1	2981064	2981297	Promoter	ENSG00000177133.6	-714
chr1	3075797	3076217	Intron (ENST00000511072.1/ENSG00000142611.12, intron 1 of 15)	ENSG00000226286.1	-25524	chr1	2981526	2981812	Intron (ENST00000445317.1/ENSG00000177133.6, intron 2 of 6)	ENSG00000177133.6	-1176
chr1	3076897	3077670	Intron (ENST00000511072.1/ENSG00000142611.12, intron 1 of 15)	ENSG00000226286.1	-26624	chr1	2982104	2982357	Intron (ENST00000445317.1/ENSG00000177133.6, intron 2 of 6)	ENSG00000177133.6	-1754
chr1	3077846	3078910	Intron (ENST00000511072.1/ENSG00000142611.12, intron 1 of 15)	ENSG00000226286.1	-27573	chr1	2982970	2983537	Promoter	ENSG00000177133.6	796
chr1	3079071	3079436	Intron (ENST00000511072.1/ENSG00000142611.12, intron 1 of 15)	ENSG00000226286.1	-28798	chr1	2988189	2989097	Intron (ENST00000511072.1/ENSG00000142611.12, intron 1 of 15)	ENSG00000142611.12	2414
chr1	3080277	3080677	Intron (ENST00000511072.1/ENSG00000142611.12, intron 1 of 15)	ENSG00000226286.1	-30004	chr1	2989344	2989566	Intron (ENST00000511072.1/ENSG00000142611.12, intron 1 of 15)	ENSG00000142611.12	3569
chr1	3081180	3081738	Intron (ENST00000511072.1/ENSG00000142611.12, intron 1 of 15)	ENSG00000226286.1	-30907	chr1	2991830	2992323	Intron (ENST00000511072.1/ENSG00000142611.12, intron 1 of 15)	ENSG00000142611.12	6055
chr1	3082572	3083075	Intron (ENST00000511072.1/ENSG00000142611.12, intron 1 of 15)	ENSG00000226286.1	-32299	chr1	2994479	2995047	Intron (ENST00000511072.1/ENSG00000142611.12, intron 1 of 15)	ENSG00000142611.12	8704
chr1	3083531	3084126	Intron (ENST00000511072.1/ENSG00000142611.12, intron 1 of 15)	ENSG00000226286.1	-33258	chr1	2996252	2996500	Intron (ENST00000511072.1/ENSG00000142611.12, intron 1 of 15)	ENSG00000142611.12	10477
chr1	3084971	3085750	Intron (ENST00000511072.1/ENSG00000142611.12, intron 1 of 15)	ENSG00000226286.1	-34698	chr1	2997958	2998628	Intron (ENST00000511072.1/ENSG00000142611.12, intron 1 of 15)	ENSG00000142611.12	12183
chr1	3086059	3086299	Intron (ENST00000511072.1/ENSG00000142611.12, intron 1 of 15)	ENSG00000226286.1	-35786	chr1	2999281	2999496	Intron (ENST00000511072.1/ENSG00000142611.12, intron 1 of 15)	ENSG00000142611.12	13506
chr1	3086614	3086988	Intron (ENST00000511072.1/ENSG00000142611.12, intron 1 of 15)	ENSG00000226286.1	-36341	chr1	2999675	2999948	Intron (ENST00000511072.1/ENSG00000142611.12, intron 1 of 15)	ENSG00000142611.12	13900
chr1	3088618	3089000	Intron (ENST00000511072.1/ENSG00000142611.12, intron 1 of 15)	ENSG00000226286.1	-38345	chr1	3000367	3001518	Intron (ENST00000511072.1/ENSG00000142611.12, intron 1 of 15)	ENSG00000142611.12	14592
chr1	3089246	3089603	Intron (ENST00000511072.1/ENSG00000142611.12, intron 1 of 15)	ENSG00000226286.1	-38973	chr1	3001667	3001897	Intron (ENST00000511072.1/ENSG00000142611.12, intron 1 of 15)	ENSG00000142611.12	15892
chr1	3089953	3090258	Intron (ENST00000511072.1/ENSG00000142611.12, intron 1 of 15)	ENSG00000226286.1	-39680	chr1	3002154	3002434	Intron (ENST00000511072.1/ENSG00000142611.12, intron 1 of 15)	ENSG00000142611.12	16379
chr1	3090424	3090906	Intron (ENST00000511072.1/ENSG00000142611.12, intron 1 of 15)	ENSG00000226286.1	-40151	chr1	3005949	3006362	Intron (ENST00000511072.1/ENSG00000142611.12, intron 1 of 15)	ENSG00000142611.12	20174
chr1	3091220	3092318	Intron (ENST00000511072.1/ENSG00000142611.12, intron 1 of 15)	ENSG00000226286.1	-40947	chr1	3007918	3008147	Intron (ENST00000511072.1/ENSG00000142611.12, intron 1 of 15)	ENSG00000142611.12	22143
chr1	3094072	3094618	Intron (ENST00000511072.1/ENSG00000142611.12, intron 1 of 15)	ENSG00000226286.1	-43799	chr1	3008416	3008708	Intron (ENST00000511072.1/ENSG00000142611.12, intron 1 of 15)	ENSG00000142611.12	22641
chr1	3095256	3095553	Intron (ENST00000511072.1/ENSG00000142611.12, intron 1 of 15)	ENSG00000226286.1	-44983	chr1	3009710	3010081	Intron (ENST00000511072.1/ENSG00000142611.12, intron 1 of 15)	ENSG00000142611.12	23935
chr1	3095703	3096291	Intron (ENST00000511072.1/ENSG00000142611.12, intron 1 of 15)	ENSG00000226286.1	-45430	chr1	3010321	3010719	Intron (ENST00000511072.1/ENSG00000142611.12, intron 1 of 15)	ENSG00000142611.12	24546
chr1	3099594	3100269	Intron (ENST00000511072.1/ENSG00000142611.12, intron 1 of 15)	ENSG00000226286.1	-49321	chr1	3011212	3011954	Intron (ENST00000511072.1/ENSG00000142611.12, intron 1 of 15)	ENSG00000142611.12	25437
chr1	3100816	3101082	Intron (ENST00000511072.1/ENSG00000142611.12, intron 1 of 15)	ENSG00000226286.1	-50543	chr1	3012195	3012646	Intron (ENST00000511072.1/ENSG00000142611.12, intron 1 of 15)	ENSG00000142611.12	26420
chr1	3101424	3102362	Intron (ENST00000511072.1/ENSG00000142611.12, intron 1 of 15)	ENSG00000226286.1	-51151	chr1	3013875	3014222	Intron (ENST00000511072.1/ENSG00000142611.12, intron 1 of 15)	ENSG00000142611.12	28100
chr1	3102897	3104099	Exon (ENST00000511072.1/ENSG00000142611.12, exon 2 of 16)	ENSG00000142611.12	-50396	chr1	3015841	3017219	Intron (ENST00000511072.1/ENSG00000142611.12, intron 1 of 15)	ENSG00000142611.12	30066
chr1	3105782	3106437	Intron (ENST00000511072.1/ENSG00000142611.12, intron 2 of 15)	ENSG00000142611.12	-48058	chr1	3017984	3018265	Intron (ENST00000511072.1/ENSG00000142611.12, intron 1 of 15)	ENSG00000226286.1	32008
chr1	3107858	3108114	Intron (ENST00000511072.1/ENSG00000142611.12, intron 2 of 15)	ENSG00000142611.12	-46381	chr1	3018786	3019508	Intron (ENST00000511072.1/ENSG00000142611.12, intron 1 of 15)	ENSG00000226286.1	30765
chr1	3109312	3110865	Intron (ENST00000511072.1/ENSG00000142611.12, intron 2 of 15)	ENSG00000142611.12	-43630	chr1	3020681	3021867	Intron (ENST00000511072.1/ENSG00000142611.12, intron 1 of 15)	ENSG00000226286.1	28406
chr1	3112050	3113357	Intron (ENST00000511072.1/ENSG00000142611.12, intron 2 of 15)	ENSG00000142611.12	-41138	chr1	3022350	3023050	Intron (ENST00000511072.1/ENSG00000142611.12, intron 1 of 15)	ENSG00000226286.1	27223
chr1	3113594	3113880	Intron (ENST00000511072.1/ENSG00000142611.12, intron 2 of 15)	ENSG00000142611.12	-40615	chr1	3023668	3023949	Intron (ENST00000511072.1/ENSG00000142611.12, intron 1 of 15)	ENSG00000226286.1	26324
chr1	3114675	3114979	Intron (ENST00000511072.1/ENSG00000142611.12, intron 2 of 15)	ENSG00000142611.12	-39516	chr1	3026591	3026839	Intron (ENST00000511072.1/ENSG00000142611.12, intron 1 of 15)	ENSG00000226286.1	23434
chr1	3115932	3116875	Intron (ENST00000511072.1/ENSG00000142611.12, intron 2 of 15)	ENSG00000142611.12	-37620	chr1	3027280	3027709	Intron (ENST00000511072.1/ENSG00000142611.12, intron 1 of 15)	ENSG00000226286.1	22564
chr1	3117185	3117425	Intron (ENST00000511072.1/ENSG00000142611.12, intron 2 of 15)	ENSG00000142611.12	-37070	chr1	3028267	3028894	Intron (ENST00000511072.1/ENSG00000142611.12, intron 1 of 15)	ENSG00000226286.1	21379
chr1	3118371	3118936	Intron (ENST00000511072.1/ENSG00000142611.12, intron 2 of 15)	ENSG00000142611.12	-35559	chr1	3030807	3033218	Intron (ENST00000511072.1/ENSG00000142611.12, intron 1 of 15)	ENSG00000226286.1	17055
chr1	3119864	3120159	Intron (ENST00000511072.1/ENSG00000142611.12, intron 2 of 15)	ENSG00000142611.12	-34336	chr1	3033486	3033838	Intron (ENST00000511072.1/ENSG00000142611.12, intron 1 of 15)	ENSG00000226286.1	16435
chr1	3121211	3121719	Intron (ENST00000511072.1/ENSG00000142611.12, intron 2 of 15)	ENSG00000142611.12	-32776	chr1	3034276	3034511	Intron (ENST00000511072.1/ENSG00000142611.12, intron 1 of 15)	ENSG00000226286.1	15762
chr1	3122442	3122682	Intron (ENST00000511072.1/ENSG00000142611.12, intron 2 of 15)	ENSG00000142611.12	-31813	chr1	3035118	3036380	Intron (ENST00000511072.1/ENSG00000142611.12, intron 1 of 15)	ENSG00000226286.1	13893
chr1	3123088	3123603	Intron (ENST00000511072.1/ENSG00000142611.12, intron 2 of 15)	ENSG00000142611.12	-30892	chr1	3037727	3039253	Intron (ENST00000511072.1/ENSG00000142611.12, intron 1 of 15)	ENSG00000226286.1	11020
chr1	3125458	3125698	Intron (ENST00000511072.1/ENSG00000142611.12, intron 2 of 15)	ENSG00000142611.12	-28797	chr1	3039585	3040039	Intron (ENST00000511072.1/ENSG00000142611.12, intron 1 of 15)	ENSG00000226286.1	10234
chr1	3127369	3127722	Intron (ENST00000511072.1/ENSG00000142611.12, intron 2 of 15)	ENSG00000142611.12	-26773	chr1	3040914	3041216	Intron (ENST00000511072.1/ENSG00000142611.12, intron 1 of 15)	ENSG00000226286.1	9057
chr1	3127875	3128557	Intron (ENST00000511072.1/ENSG00000142611.12, intron 2 of 15)	ENSG00000142611.12	-25938	chr1	3041626	3042517	Intron (ENST00000511072.1/ENSG00000142611.12, intron 1 of 15)	ENSG00000226286.1	7756
chr1	3129269	3129664	Intron (ENST00000511072.1/ENSG00000142611.12, intron 2 of 15)	ENSG00000142611.12	-24831	chr1	3042913	3043683	Intron (ENST00000511072.1/ENSG00000142611.12, intron 1 of 15)	ENSG00000226286.1	6590
chr1	3131134	3131532	Intron (ENST00000511072.1/ENSG00000142611.12, intron 2 of 15)	ENSG00000142611.12	-22963	chr1	3044238	3044453	Intron (ENST00000511072.1/ENSG00000142611.12, intron 1 of 15)	ENSG00000226286.1	5820
chr1	3132573	3132956	Intron (ENST00000511072.1/ENSG00000142611.12, intron 2 of 15)	ENSG00000142611.12	-21539	chr1	3046302	3046763	Intron (ENST00000511072.1/ENSG00000142611.12, intron 1 of 15)	ENSG00000226286.1	3510
chr1	3134539	3134936	Intron (ENST00000511072.1/ENSG00000142611.12, intron 2 of 15)	ENSG00000142611.12	-19559	chr1	3048484	3049027	Intron (ENST00000511072.1/ENSG00000142611.12, intron 1 of 15)	ENSG00000226286.1	1246
chr1	3136773	3138364	Intron (ENST00000511072.1/ENSG00000142611.12, intron 2 of 15)	ENSG00000142611.12	-16131	chr1	3050145	3050703	Promoter	ENSG00000226286.1	0
chr1	3139042	3139723	Intron (ENST00000511072.1/ENSG00000142611.12, intron 2 of 15)	ENSG00000142611.12	-14772	chr1	3051486	3053119	Intron (ENST00000511072.1/ENSG00000142611.12, intron 1 of 15)	ENSG00000226286.1	-1213
chr1	3140738	3141627	Intron (ENST00000511072.1/ENSG00000142611.12, intron 2 of 15)	ENSG00000142611.12	-12868	chr1	3053285	3054094	Intron (ENST00000511072.1/ENSG00000142611.12, intron 1 of 15)	ENSG00000226286.1	-3012
chr1	3142355	3142741	Intron (ENST00000511072.1/ENSG00000142611.12, intron 2 of 15)	ENSG00000142611.12	-11754	chr1	3054513	3055164	Intron (ENST00000511072.1/ENSG00000142611.12, intron 1 of 15)	ENSG00000226286.1	-4240
chr1	3144724	3144971	Intron (ENST00000511072.1/ENSG00000142611.12, intron 2 of 15)	ENSG00000142611.12	-9524	chr1	3055677	3056235	Intron (ENST00000511072.1/ENSG00000142611.12, intron 1 of 15)	ENSG00000226286.1	-5404
chr1	3145809	3146311	Intron (ENST00000511072.1/ENSG00000142611.12, intron 2 of 15)	ENSG00000142611.12	-8184	chr1	3057829	3058044	Intron (ENST00000511072.1/ENSG00000142611.12, intron 1 of 15)	ENSG00000226286.1	-7556
chr1	3147291	3147606	Intron (ENST00000511072.1/ENSG00000142611.12, intron 2 of 15)	ENSG00000142611.12	-6889	chr1	3058905	3059452	Intron (ENST00000511072.1/ENSG00000142611.12, intron 1 of 15)	ENSG00000226286.1	-8632
chr1	3149984	3150304	Intron (ENST00000511072.1/ENSG00000142611.12, intron 2 of 15)	ENSG00000142611.12	-4191	chr1	3059653	3060644	Intron (ENST00000511072.1/ENSG00000142611.12, intron 1 of 15)	ENSG00000226286.1	-9380
chr1	3150738	3151235	Intron (ENST00000511072.1/ENSG00000142611.12, intron 2 of 15)	ENSG00000142611.12	-3260	chr1	3060823	3061102	Intron (ENST00000511072.1/ENSG00000142611.12, intron 1 of 15)	ENSG00000226286.1	-10550
chr1	3151439	3151930	Intron (ENST00000511072.1/ENSG00000142611.12, intron 2 of 15)	ENSG00000142611.12	-2565	chr1	3061368	3062211	Intron (ENST00000511072.1/ENSG00000142611.12, intron 1 of 15)	ENSG00000226286.1	-11095
chr1	3152262	3152535	Intron (ENST00000511072.1/ENSG00000142611.12, intron 2 of 15)	ENSG00000142611.12	-1960	chr1	3062809	3064120	Intron (ENST00000511072.1/ENSG00000142611.12, intron 1 of 15)	ENSG00000226286.1	-12536
chr1	3153114	3153369	Intron (ENST00000511072.1/ENSG00000142611.12, intron 2 of 15)	ENSG00000142611.12	-1126	chr1	3064548	3065016	Intron (ENST00000511072.1/ENSG00000142611.12, intron 1 of 15)	ENSG00000226286.1	-14275
chr1	3154520	3155875	Promoter	ENSG00000142611.12	25	chr1	3065325	3065665	Intron (ENST00000511072.1/ENSG00000142611.12, intron 1 of 15)	ENSG00000226286.1	-15052
chr1	3157966	3158435	Intron (ENST00000511072.1/ENSG00000142611.12, intron 2 of 15)	ENSG00000142611.12	-2261	chr1	3067759	3067979	Intron (ENST00000511072.1/ENSG00000142611.12, intron 1 of 15)	ENSG00000226286.1	-17486
chr1	3158719	3159059	Intron (ENST00000511072.1/ENSG00000142611.12, intron 2 of 15)	ENSG00000142611.12	-1637	chr1	3068201	3068802	Intron (ENST00000511072.1/ENSG00000142611.12, intron 1 of 15)	ENSG00000226286.1	-17928
chr1	3160177	3160464	Promoter	ENSG00000142611.12	-232	chr1	3069113	3069984	Intron (ENST00000511072.1/ENSG00000142611.12, intron 1 of 15)	ENSG00000226286.1	-18840
chr1	3162419	3162820	Intron (ENST00000511072.1/ENSG00000142611.12, intron 3 of 15)	ENSG00000142611.12	1723	chr1	3071167	3071382	Intron (ENST00000511072.1/ENSG00000142611.12, intron 1 of 15)	ENSG00000226286.1	-20894
chr1	3163413	3163653	Intron (ENST00000511072.1/ENSG00000142611.12, intron 3 of 15)	ENSG00000142611.12	2717	chr1	3072122	3072387	Intron (ENST00000511072.1/ENSG00000142611.12, intron 1 of 15)	ENSG00000226286.1	-21849
chr1	3166191	3167059	Intron (ENST00000511072.1/ENSG00000142611.12, intron 3 of 15)	ENSG00000142611.12	5495	chr1	3072585	3072800	Intron (ENST00000511072.1/ENSG00000142611.12, intron 1 of 15)	ENSG00000226286.1	-22312
chr1	3172873	3173452	Intron (ENST00000511072.1/ENSG00000142611.12, intron 3 of 15)	ENSG00000142611.12	12177	chr1	3076790	3077347	Intron (ENST00000511072.1/ENSG00000142611.12, intron 1 of 15)	ENSG00000226286.1	-26517
chr1	3173890	3174279	Intron (ENST00000511072.1/ENSG00000142611.12, intron 3 of 15)	ENSG00000142611.12	13194	chr1	3077911	3078157	Intron (ENST00000511072.1/ENSG00000142611.12, intron 1 of 15)	ENSG00000226286.1	-27638
chr1	3174475	3174769	Intron (ENST00000511072.1/ENSG00000142611.12, intron 3 of 15)	ENSG00000142611.12	13779	chr1	3078779	3079578	Intron (ENST00000511072.1/ENSG00000142611.12, intron 1 of 15)	ENSG00000226286.1	-28506
chr1	3175991	3176529	Intron (ENST00000511072.1/ENSG00000142611.12, intron 3 of 15)	ENSG00000142611.12	15295	chr1	3081053	3081882	Intron (ENST00000511072.1/ENSG00000142611.12, intron 1 of 15)	ENSG00000226286.1	-30780
chr1	3177973	3178311	Intron (ENST00000511072.1/ENSG00000142611.12, intron 3 of 15)	ENSG00000142611.12	17277	chr1	3082869	3083947	Intron (ENST00000511072.1/ENSG00000142611.12, intron 1 of 15)	ENSG00000226286.1	-32596
chr1	3179415	3179961	Intron (ENST00000511072.1/ENSG00000142611.12, intron 3 of 15)	ENSG00000142611.12	18719	chr1	3086074	3086340	Intron (ENST00000511072.1/ENSG00000142611.12, intron 1 of 15)	ENSG00000226286.1	-35801
chr1	3181167	3182674	Intron (ENST00000511072.1/ENSG00000142611.12, intron 3 of 15)	ENSG00000142611.12	20471	chr1	3089801	3090952	Intron (ENST00000511072.1/ENSG00000142611.12, intron 1 of 15)	ENSG00000226286.1	-39528
chr1	3183983	3184738	Intron (ENST00000511072.1/ENSG00000142611.12, intron 3 of 15)	ENSG00000142611.12	23287	chr1	3092233	3092592	Intron (ENST00000511072.1/ENSG00000142611.12, intron 1 of 15)	ENSG00000226286.1	-41960
chr1	3185384	3185960	Intron (ENST00000511072.1/ENSG00000142611.12, intron 3 of 15)	ENSG00000142611.12	24688	chr1	3094972	3095299	Intron (ENST00000511072.1/ENSG00000142611.12, intron 1 of 15)	ENSG00000226286.1	-44699
chr1	3186641	3186928	Intron (ENST00000511072.1/ENSG00000142611.12, intron 3 of 15)	ENSG00000142611.12	25945	chr1	3095569	3095955	Intron (ENST00000511072.1/ENSG00000142611.12, intron 1 of 15)	ENSG00000226286.1	-45296
chr1	3187498	3187738	Intron (ENST00000511072.1/ENSG00000142611.12, intron 3 of 15)	ENSG00000142611.12	26802	chr1	3097133	3097397	Intron (ENST00000511072.1/ENSG00000142611.12, intron 1 of 15)	ENSG00000226286.1	-46860
chr1	3188061	3189184	Intron (ENST00000511072.1/ENSG00000142611.12, intron 3 of 15)	ENSG00000142611.12	27365	chr1	3098724	3098939	Intron (ENST00000511072.1/ENSG00000142611.12, intron 1 of 15)	ENSG00000226286.1	-48451
chr1	3190063	3190335	Intron (ENST00000511072.1/ENSG00000142611.12, intron 3 of 15)	ENSG00000142611.12	29367	chr1	3099163	3099928	Intron (ENST00000511072.1/ENSG00000142611.12, intron 1 of 15)	ENSG00000226286.1	-48890
chr1	3191433	3191715	Intron (ENST00000511072.1/ENSG00000142611.12, intron 3 of 15)	ENSG00000142611.12	30737	chr1	3101106	3101606	Intron (ENST00000511072.1/ENSG00000142611.12, intron 1 of 15)	ENSG00000226286.1	-50833
chr1	3191952	3192860	Intron (ENST00000511072.1/ENSG00000142611.12, intron 3 of 15)	ENSG00000142611.12	31256	chr1	3102459	3102761	Exon (ENST00000511072.1/ENSG00000142611.12, exon 2 of 16)	ENSG00000142611.12	-51734
chr1	3193655	3194122	Intron (ENST00000511072.1/ENSG00000142611.12, intron 3 of 15)	ENSG00000272235.1	32538	chr1	3103071	3103431	Exon (ENST00000607632.1/ENSG00000142611.12, exon 2 of 2)	ENSG00000142611.12	-51064
chr1	3194382	3195061	Intron (ENST00000511072.1/ENSG00000142611.12, intron 3 of 15)	ENSG00000272235.1	31599	chr1	3103693	3103946	Intron (ENST00000511072.1/ENSG00000142611.12, intron 2 of 15)	ENSG00000142611.12	-50549
chr1	3195368	3195919	Intron (ENST00000511072.1/ENSG00000142611.12, intron 3 of 15)	ENSG00000272235.1	30741	chr1	3104117	3105103	Intron (ENST00000511072.1/ENSG00000142611.12, intron 2 of 15)	ENSG00000142611.12	-49392
chr1	3197212	3197661	Intron (ENST00000511072.1/ENSG00000142611.12, intron 3 of 15)	ENSG00000272235.1	28999	chr1	3108341	3108747	Intron (ENST00000511072.1/ENSG00000142611.12, intron 2 of 15)	ENSG00000142611.12	-45748
chr1	3198128	3198533	Intron (ENST00000511072.1/ENSG00000142611.12, intron 3 of 15)	ENSG00000272235.1	28127	chr1	3109376	3109934	Intron (ENST00000511072.1/ENSG00000142611.12, intron 2 of 15)	ENSG00000142611.12	-44561
chr1	3200020	3200436	Intron (ENST00000511072.1/ENSG00000142611.12, intron 3 of 15)	ENSG00000272235.1	26224	chr1	3110124	3110784	Intron (ENST00000511072.1/ENSG00000142611.12, intron 2 of 15)	ENSG00000142611.12	-43711
chr1	3200599	3200839	Intron (ENST00000511072.1/ENSG00000142611.12, intron 3 of 15)	ENSG00000272235.1	25821	chr1	3111545	3112660	Intron (ENST00000511072.1/ENSG00000142611.12, intron 2 of 15)	ENSG00000142611.12	-41835
chr1	3201082	3202185	Intron (ENST00000511072.1/ENSG00000142611.12, intron 3 of 15)	ENSG00000272235.1	24475	chr1	3113169	3114688	Intron (ENST00000511072.1/ENSG00000142611.12, intron 2 of 15)	ENSG00000142611.12	-39807
chr1	3202743	3203588	Intron (ENST00000511072.1/ENSG00000142611.12, intron 3 of 15)	ENSG00000272235.1	23072	chr1	3116492	3116847	Intron (ENST00000511072.1/ENSG00000142611.12, intron 2 of 15)	ENSG00000142611.12	-37648
chr1	3204966	3205661	Intron (ENST00000511072.1/ENSG00000142611.12, intron 3 of 15)	ENSG00000272235.1	20999	chr1	3117111	3117643	Intron (ENST00000511072.1/ENSG00000142611.12, intron 2 of 15)	ENSG00000142611.12	-36852
chr1	3205828	3206159	Intron (ENST00000511072.1/ENSG00000142611.12, intron 3 of 15)	ENSG00000272235.1	20501	chr1	3119249	3119596	Intron (ENST00000511072.1/ENSG00000142611.12, intron 2 of 15)	ENSG00000142611.12	-34899
chr1	3207146	3207481	Intron (ENST00000511072.1/ENSG00000142611.12, intron 3 of 15)	ENSG00000272235.1	19179	chr1	3122012	3123742	Intron (ENST00000511072.1/ENSG00000142611.12, intron 2 of 15)	ENSG00000142611.12	-30753
chr1	3207948	3208503	Intron (ENST00000511072.1/ENSG00000142611.12, intron 3 of 15)	ENSG00000272235.1	18157	chr1	3124155	3124490	Intron (ENST00000511072.1/ENSG00000142611.12, intron 2 of 15)	ENSG00000142611.12	-30005
chr1	3210768	3211008	Intron (ENST00000511072.1/ENSG00000142611.12, intron 3 of 15)	ENSG00000272235.1	15652	chr1	3125501	3125989	Intron (ENST00000511072.1/ENSG00000142611.12, intron 2 of 15)	ENSG00000142611.12	-28506
chr1	3211372	3211713	Intron (ENST00000511072.1/ENSG00000142611.12, intron 3 of 15)	ENSG00000272235.1	14947	chr1	3126225	3126545	Intron (ENST00000511072.1/ENSG00000142611.12, intron 2 of 15)	ENSG00000142611.12	-27950
chr1	3211910	3212393	Intron (ENST00000511072.1/ENSG00000142611.12, intron 3 of 15)	ENSG00000272235.1	14267	chr1	3128620	3129680	Intron (ENST00000511072.1/ENSG00000142611.12, intron 2 of 15)	ENSG00000142611.12	-24815
chr1	3220632	3220872	Intron (ENST00000511072.1/ENSG00000142611.12, intron 3 of 15)	ENSG00000272235.1	5788	chr1	3130287	3130502	Intron (ENST00000511072.1/ENSG00000142611.12, intron 2 of 15)	ENSG00000142611.12	-23993
chr1	3221717	3222244	Intron (ENST00000511072.1/ENSG00000142611.12, intron 3 of 15)	ENSG00000272235.1	4416	chr1	3131360	3131662	Intron (ENST00000511072.1/ENSG00000142611.12, intron 2 of 15)	ENSG00000142611.12	-22833
chr1	3224900	3225220	Exon (ENST00000607061.1/ENSG00000272235.1, exon 1 of 1)	ENSG00000272235.1	1440	chr1	3132212	3132575	Intron (ENST00000511072.1/ENSG00000142611.12, intron 2 of 15)	ENSG00000142611.12	-21920
chr1	3225740	3226156	Promoter	ENSG00000272235.1	504	chr1	3134367	3134602	Intron (ENST00000511072.1/ENSG00000142611.12, intron 2 of 15)	ENSG00000142611.12	-19893
chr1	3226901	3227487	Promoter	ENSG00000272235.1	-241	chr1	3135290	3136145	Intron (ENST00000511072.1/ENSG00000142611.12, intron 2 of 15)	ENSG00000142611.12	-18350
chr1	3227723	3228250	Intron (ENST00000511072.1/ENSG00000142611.12, intron 3 of 15)	ENSG00000272235.1	-1063	chr1	3136929	3137700	Intron (ENST00000511072.1/ENSG00000142611.12, intron 2 of 15)	ENSG00000142611.12	-16795
chr1	3228625	3229124	Intron (ENST00000511072.1/ENSG00000142611.12, intron 3 of 15)	ENSG00000272235.1	-1965	chr1	3139061	3139384	Intron (ENST00000511072.1/ENSG00000142611.12, intron 2 of 15)	ENSG00000142611.12	-15111
chr1	3233037	3233277	Intron (ENST00000511072.1/ENSG00000142611.12, intron 3 of 15)	ENSG00000272235.1	-6377	chr1	3140600	3141155	Intron (ENST00000511072.1/ENSG00000142611.12, intron 2 of 15)	ENSG00000142611.12	-13340
chr1	3235445	3235929	Intron (ENST00000511072.1/ENSG00000142611.12, intron 3 of 15)	ENSG00000272235.1	-8785	chr1	3142308	3142766	Intron (ENST00000511072.1/ENSG00000142611.12, intron 2 of 15)	ENSG00000142611.12	-11729
chr1	3239120	3239804	Intron (ENST00000511072.1/ENSG00000142611.12, intron 3 of 15)	ENSG00000272235.1	-12460	chr1	3143261	3144657	Intron (ENST00000511072.1/ENSG00000142611.12, intron 2 of 15)	ENSG00000142611.12	-9838
chr1	3240296	3241143	Intron (ENST00000511072.1/ENSG00000142611.12, intron 3 of 15)	ENSG00000272235.1	-13636	chr1	3145127	3145607	Intron (ENST00000511072.1/ENSG00000142611.12, intron 2 of 15)	ENSG00000142611.12	-8888
chr1	3242553	3243893	Intron (ENST00000511072.1/ENSG00000142611.12, intron 3 of 15)	ENSG00000272235.1	-15893	chr1	3146190	3146469	Intron (ENST00000511072.1/ENSG00000142611.12, intron 2 of 15)	ENSG00000142611.12	-8026
chr1	3244094	3244865	Intron (ENST00000511072.1/ENSG00000142611.12, intron 3 of 15)	ENSG00000272235.1	-17434	chr1	3146636	3147149	Intron (ENST00000511072.1/ENSG00000142611.12, intron 2 of 15)	ENSG00000142611.12	-7346
chr1	3245452	3246233	Intron (ENST00000511072.1/ENSG00000142611.12, intron 3 of 15)	ENSG00000272235.1	-18792	chr1	3147717	3148267	Intron (ENST00000511072.1/ENSG00000142611.12, intron 2 of 15)	ENSG00000142611.12	-6228
chr1	3247762	3248621	Intron (ENST00000511072.1/ENSG00000142611.12, intron 3 of 15)	ENSG00000272235.1	-21102	chr1	3150377	3150658	Intron (ENST00000511072.1/ENSG00000142611.12, intron 2 of 15)	ENSG00000142611.12	-3837
chr1	3249634	3250422	Intron (ENST00000511072.1/ENSG00000142611.12, intron 3 of 15)	ENSG00000272235.1	-22974	chr1	3150964	3151631	Intron (ENST00000511072.1/ENSG00000142611.12, intron 2 of 15)	ENSG00000142611.12	-2864
chr1	3250699	3251423	Intron (ENST00000511072.1/ENSG00000142611.12, intron 3 of 15)	ENSG00000272235.1	-24039	chr1	3151934	3152873	Intron (ENST00000511072.1/ENSG00000142611.12, intron 2 of 15)	ENSG00000142611.12	-1622
chr1	3254728	3255002	Intron (ENST00000511072.1/ENSG00000142611.12, intron 3 of 15)	ENSG00000272235.1	-28068	chr1	3153024	3154018	Promoter	ENSG00000142611.12	-477
chr1	3255428	3255682	Intron (ENST00000511072.1/ENSG00000142611.12, intron 3 of 15)	ENSG00000272235.1	-28768	chr1	3154680	3154895	Promoter	ENSG00000142611.12	185
chr1	3256236	3257278	Intron (ENST00000511072.1/ENSG00000142611.12, intron 3 of 15)	ENSG00000272235.1	-29576	chr1	3157605	3157858	Intron (ENST00000511072.1/ENSG00000142611.12, intron 2 of 15)	ENSG00000142611.12	-2838
chr1	3262671	3263005	Intron (ENST00000511072.1/ENSG00000142611.12, intron 3 of 15)	ENSG00000272235.1	-36011	chr1	3158441	3158708	Intron (ENST00000511072.1/ENSG00000142611.12, intron 2 of 15)	ENSG00000142611.12	-1988
chr1	3263490	3263815	Intron (ENST00000511072.1/ENSG00000142611.12, intron 3 of 15)	ENSG00000272235.1	-36830	chr1	3158960	3159175	Intron (ENST00000511072.1/ENSG00000142611.12, intron 2 of 15)	ENSG00000142611.12	-1521
chr1	3264920	3265215	Intron (ENST00000511072.1/ENSG00000142611.12, intron 3 of 15)	ENSG00000272235.1	-38260	chr1	3159607	3160204	Promoter	ENSG00000142611.12	-492
chr1	3265422	3265670	Intron (ENST00000511072.1/ENSG00000142611.12, intron 3 of 15)	ENSG00000272235.1	-38762	chr1	3163015	3163266	Intron (ENST00000511072.1/ENSG00000142611.12, intron 3 of 15)	ENSG00000142611.12	2319
chr1	3266875	3267241	Intron (ENST00000511072.1/ENSG00000142611.12, intron 3 of 15)	ENSG00000272235.1	-40215	chr1	3163615	3163960	Intron (ENST00000511072.1/ENSG00000142611.12, intron 3 of 15)	ENSG00000142611.12	2919
chr1	3268493	3269186	Intron (ENST00000511072.1/ENSG00000142611.12, intron 3 of 15)	ENSG00000272235.1	-41833	chr1	3164600	3164815	Intron (ENST00000511072.1/ENSG00000142611.12, intron 3 of 15)	ENSG00000142611.12	3904
chr1	3269730	3270209	Intron (ENST00000511072.1/ENSG00000142611.12, intron 3 of 15)	ENSG00000142611.12	-42846	chr1	3165554	3166075	Intron (ENST00000511072.1/ENSG00000142611.12, intron 3 of 15)	ENSG00000142611.12	4858
chr1	3271667	3272108	Intron (ENST00000511072.1/ENSG00000142611.12, intron 3 of 15)	ENSG00000142611.12	-40947	chr1	3166774	3167599	Intron (ENST00000511072.1/ENSG00000142611.12, intron 3 of 15)	ENSG00000142611.12	6078
chr1	3274896	3275543	Intron (ENST00000511072.1/ENSG00000142611.12, intron 3 of 15)	ENSG00000142611.12	-37512	chr1	3168286	3168796	Intron (ENST00000511072.1/ENSG00000142611.12, intron 3 of 15)	ENSG00000142611.12	7590
chr1	3276810	3278302	Intron (ENST00000511072.1/ENSG00000142611.12, intron 3 of 15)	ENSG00000142611.12	-34753	chr1	3169139	3169741	Intron (ENST00000511072.1/ENSG00000142611.12, intron 3 of 15)	ENSG00000142611.12	8443
chr1	3279164	3280063	Intron (ENST00000511072.1/ENSG00000142611.12, intron 3 of 15)	ENSG00000142611.12	-32992	chr1	3172465	3173212	Intron (ENST00000511072.1/ENSG00000142611.12, intron 3 of 15)	ENSG00000142611.12	11769
chr1	3280640	3280887	Intron (ENST00000511072.1/ENSG00000142611.12, intron 3 of 15)	ENSG00000142611.12	-32168	chr1	3174048	3174339	Intron (ENST00000511072.1/ENSG00000142611.12, intron 3 of 15)	ENSG00000142611.12	13352
chr1	3281076	3281316	Intron (ENST00000511072.1/ENSG00000142611.12, intron 3 of 15)	ENSG00000142611.12	-31739	chr1	3174569	3174926	Intron (ENST00000511072.1/ENSG00000142611.12, intron 3 of 15)	ENSG00000142611.12	13873
chr1	3281636	3281910	Intron (ENST00000511072.1/ENSG00000142611.12, intron 3 of 15)	ENSG00000142611.12	-31145	chr1	3175654	3176265	Intron (ENST00000511072.1/ENSG00000142611.12, intron 3 of 15)	ENSG00000142611.12	14958
chr1	3284641	3285121	Intron (ENST00000511072.1/ENSG00000142611.12, intron 3 of 15)	ENSG00000142611.12	-27934	chr1	3176771	3177073	Intron (ENST00000511072.1/ENSG00000142611.12, intron 3 of 15)	ENSG00000142611.12	16075
chr1	3286686	3287170	Intron (ENST00000511072.1/ENSG00000142611.12, intron 3 of 15)	ENSG00000142611.12	-25885	chr1	3178267	3178533	Intron (ENST00000511072.1/ENSG00000142611.12, intron 3 of 15)	ENSG00000142611.12	17571
chr1	3288093	3288713	Intron (ENST00000511072.1/ENSG00000142611.12, intron 3 of 15)	ENSG00000142611.12	-24342	chr1	3179643	3179930	Intron (ENST00000511072.1/ENSG00000142611.12, intron 3 of 15)	ENSG00000142611.12	18947
chr1	3289078	3289817	Intron (ENST00000511072.1/ENSG00000142611.12, intron 3 of 15)	ENSG00000142611.12	-23238	chr1	3181900	3182175	Intron (ENST00000511072.1/ENSG00000142611.12, intron 3 of 15)	ENSG00000142611.12	21204
chr1	3290086	3290326	Intron (ENST00000511072.1/ENSG00000142611.12, intron 3 of 15)	ENSG00000142611.12	-22729	chr1	3185380	3185768	Intron (ENST00000511072.1/ENSG00000142611.12, intron 3 of 15)	ENSG00000142611.12	24684
chr1	3291323	3291639	Intron (ENST00000511072.1/ENSG00000142611.12, intron 3 of 15)	ENSG00000142611.12	-21416	chr1	3186065	3186730	Intron (ENST00000511072.1/ENSG00000142611.12, intron 3 of 15)	ENSG00000142611.12	25369
chr1	3292533	3293621	Intron (ENST00000511072.1/ENSG00000142611.12, intron 3 of 15)	ENSG00000142611.12	-19434	chr1	3187819	3188152	Intron (ENST00000511072.1/ENSG00000142611.12, intron 3 of 15)	ENSG00000142611.12	27123
chr1	3293913	3295090	Intron (ENST00000511072.1/ENSG00000142611.12, intron 3 of 15)	ENSG00000142611.12	-17965	chr1	3188476	3188885	Intron (ENST00000511072.1/ENSG00000142611.12, intron 3 of 15)	ENSG00000142611.12	27780
chr1	3295260	3295500	Intron (ENST00000511072.1/ENSG00000142611.12, intron 3 of 15)	ENSG00000142611.12	-17555	chr1	3189096	3189311	Intron (ENST00000511072.1/ENSG00000142611.12, intron 3 of 15)	ENSG00000142611.12	28400
chr1	3298247	3298593	Intron (ENST00000511072.1/ENSG00000142611.12, intron 3 of 15)	ENSG00000142611.12	-14462	chr1	3191623	3192654	Intron (ENST00000511072.1/ENSG00000142611.12, intron 3 of 15)	ENSG00000142611.12	30927
chr1	3299830	3300705	Intron (ENST00000511072.1/ENSG00000142611.12, intron 3 of 15)	ENSG00000142611.12	-12350	chr1	3192925	3193140	Intron (ENST00000511072.1/ENSG00000142611.12, intron 3 of 15)	ENSG00000142611.12	32229
chr1	3304949	3305265	Intron (ENST00000511072.1/ENSG00000142611.12, intron 4 of 15)	ENSG00000142611.12	-7790	chr1	3193823	3194089	Intron (ENST00000511072.1/ENSG00000142611.12, intron 3 of 15)	ENSG00000272235.1	32571
chr1	3306875	3307129	Intron (ENST00000511072.1/ENSG00000142611.12, intron 4 of 15)	ENSG00000142611.12	-5926	chr1	3194305	3194602	Intron (ENST00000511072.1/ENSG00000142611.12, intron 3 of 15)	ENSG00000272235.1	32058
chr1	3314512	3314760	Intron (ENST00000511072.1/ENSG00000142611.12, intron 5 of 15)	ENSG00000142611.12	1457	chr1	3195452	3195752	Intron (ENST00000511072.1/ENSG00000142611.12, intron 3 of 15)	ENSG00000272235.1	30908
chr1	3316666	3317124	Intron (ENST00000511072.1/ENSG00000142611.12, intron 5 of 15)	ENSG00000142611.12	3611	chr1	3196781	3197096	Intron (ENST00000511072.1/ENSG00000142611.12, intron 3 of 15)	ENSG00000272235.1	29564
chr1	3317983	3318677	Intron (ENST00000511072.1/ENSG00000142611.12, intron 5 of 15)	ENSG00000142611.12	4928	chr1	3199267	3199545	Intron (ENST00000511072.1/ENSG00000142611.12, intron 3 of 15)	ENSG00000272235.1	27115
chr1	3319698	3320009	Intron (ENST00000511072.1/ENSG00000142611.12, intron 6 of 15)	ENSG00000142611.12	6643	chr1	3202076	3202291	Intron (ENST00000511072.1/ENSG00000142611.12, intron 3 of 15)	ENSG00000272235.1	24369
chr1	3322521	3322996	Intron (ENST00000511072.1/ENSG00000142611.12, intron 8 of 15)	ENSG00000142611.12	9466	chr1	3203827	3204042	Intron (ENST00000511072.1/ENSG00000142611.12, intron 3 of 15)	ENSG00000272235.1	22618
chr1	3323949	3324500	Intron (ENST00000511072.1/ENSG00000142611.12, intron 8 of 15)	ENSG00000142611.12	10894	chr1	3204588	3205005	Intron (ENST00000511072.1/ENSG00000142611.12, intron 3 of 15)	ENSG00000272235.1	21655
chr1	3325433	3325762	Intron (ENST00000511072.1/ENSG00000142611.12, intron 8 of 15)	ENSG00000142611.12	12378	chr1	3205411	3205901	Intron (ENST00000511072.1/ENSG00000142611.12, intron 3 of 15)	ENSG00000272235.1	20759
chr1	3329722	3329988	Intron (ENST00000511072.1/ENSG00000142611.12, intron 9 of 15)	ENSG00000142611.12	-11495	chr1	3206323	3206775	Intron (ENST00000511072.1/ENSG00000142611.12, intron 3 of 15)	ENSG00000272235.1	19885
chr1	3331536	3332212	Intron (ENST00000511072.1/ENSG00000142611.12, intron 10 of 15)	ENSG00000142611.12	-9271	chr1	3207204	3208248	Intron (ENST00000511072.1/ENSG00000142611.12, intron 3 of 15)	ENSG00000272235.1	18412
chr1	3332558	3332875	Intron (ENST00000511072.1/ENSG00000142611.12, intron 10 of 15)	ENSG00000142611.12	-8608	chr1	3208563	3209066	Intron (ENST00000511072.1/ENSG00000142611.12, intron 3 of 15)	ENSG00000272235.1	17594
chr1	3333045	3333442	Intron (ENST00000511072.1/ENSG00000142611.12, intron 10 of 15)	ENSG00000142611.12	-8041	chr1	3211093	3211317	Intron (ENST00000511072.1/ENSG00000142611.12, intron 3 of 15)	ENSG00000272235.1	15343
chr1	3334629	3334869	Intron (ENST00000511072.1/ENSG00000142611.12, intron 11 of 15)	ENSG00000142611.12	-6614	chr1	3211563	3211786	Intron (ENST00000511072.1/ENSG00000142611.12, intron 3 of 15)	ENSG00000272235.1	14874
chr1	3335766	3336165	Intron (ENST00000511072.1/ENSG00000142611.12, intron 12 of 15)	ENSG00000142611.12	-5318	chr1	3212094	3212347	Intron (ENST00000511072.1/ENSG00000142611.12, intron 3 of 15)	ENSG00000272235.1	14313
chr1	3336332	3336719	Intron (ENST00000511072.1/ENSG00000142611.12, intron 12 of 15)	ENSG00000142611.12	-4764	chr1	3212661	3212887	Intron (ENST00000511072.1/ENSG00000142611.12, intron 3 of 15)	ENSG00000272235.1	13773
chr1	3336950	3337190	Intron (ENST00000511072.1/ENSG00000142611.12, intron 12 of 15)	ENSG00000142611.12	-4293	chr1	3214098	3214468	Intron (ENST00000511072.1/ENSG00000142611.12, intron 3 of 15)	ENSG00000272235.1	12192
chr1	3339338	3339578	Intron (ENST00000511072.1/ENSG00000142611.12, intron 12 of 15)	ENSG00000142611.12	-1905	chr1	3220716	3221612	Intron (ENST00000511072.1/ENSG00000142611.12, intron 3 of 15)	ENSG00000272235.1	5048
chr1	3340199	3340910	Promoter	ENSG00000142611.12	-573	chr1	3222741	3223097	Intron (ENST00000511072.1/ENSG00000142611.12, intron 3 of 15)	ENSG00000272235.1	3563
chr1	3342789	3343499	Exon (ENST00000511072.1/ENSG00000142611.12, exon 14 of 16)	ENSG00000142611.12	1009	chr1	3225399	3225813	Promoter	ENSG00000272235.1	847
chr1	3343870	3344596	Intron (ENST00000511072.1/ENSG00000142611.12, intron 14 of 15)	ENSG00000142611.12	2090	chr1	3226447	3226931	Promoter	ENSG00000272235.1	0
chr1	3346621	3347821	Exon (ENST00000511072.1/ENSG00000142611.12, exon 15 of 16)	ENSG00000142611.12	4841	chr1	3239277	3239650	Intron (ENST00000511072.1/ENSG00000142611.12, intron 3 of 15)	ENSG00000272235.1	-12617
chr1	3348148	3348616	Exon (ENST00000378398.3/ENSG00000142611.12, exon 17 of 18)	ENSG00000142611.12	6368	chr1	3242452	3242672	Intron (ENST00000511072.1/ENSG00000142611.12, intron 3 of 15)	ENSG00000272235.1	-15792
chr1	3349407	3349858	Intron (ENST00000511072.1/ENSG00000142611.12, intron 15 of 15)	ENSG00000142611.12	7627	chr1	3244534	3245546	Intron (ENST00000511072.1/ENSG00000142611.12, intron 3 of 15)	ENSG00000272235.1	-17874
chr1	3350220	3350543	3' UTR	ENSG00000142611.12	8440	chr1	3246138	3247026	Intron (ENST00000511072.1/ENSG00000142611.12, intron 3 of 15)	ENSG00000272235.1	-19478
chr1	3350849	3351114	3' UTR	ENSG00000142611.12	9069	chr1	3247185	3247793	Intron (ENST00000511072.1/ENSG00000142611.12, intron 3 of 15)	ENSG00000272235.1	-20525
chr1	3351878	3352462	3' UTR	ENSG00000142611.12	10098	chr1	3248489	3248736	Intron (ENST00000511072.1/ENSG00000142611.12, intron 3 of 15)	ENSG00000272235.1	-21829
chr1	3355420	3356453	Downstream (<=300bp)	ENSG00000142611.12	13640	chr1	3252295	3252761	Intron (ENST00000511072.1/ENSG00000142611.12, intron 3 of 15)	ENSG00000272235.1	-25635
chr1	3357043	3357540	Distal Intergenic	ENSG00000130762.10	-13450	chr1	3254018	3254279	Intron (ENST00000511072.1/ENSG00000142611.12, intron 3 of 15)	ENSG00000272235.1	-27358
chr1	3360821	3361306	Distal Intergenic	ENSG00000130762.10	-9684	chr1	3255407	3255622	Intron (ENST00000511072.1/ENSG00000142611.12, intron 3 of 15)	ENSG00000272235.1	-28747
chr1	3367262	3367722	Distal Intergenic	ENSG00000130762.10	-3268	chr1	3257589	3258110	Intron (ENST00000511072.1/ENSG00000142611.12, intron 3 of 15)	ENSG00000272235.1	-30929
chr1	3368014	3368382	Distal Intergenic	ENSG00000130762.10	-2608	chr1	3259287	3259602	Intron (ENST00000511072.1/ENSG00000142611.12, intron 3 of 15)	ENSG00000272235.1	-32627
chr1	3371785	3372103	Promoter	ENSG00000130762.10	795	chr1	3263040	3263672	Intron (ENST00000511072.1/ENSG00000142611.12, intron 3 of 15)	ENSG00000272235.1	-36380
chr1	3372955	3373809	Intron (ENST00000378378.4/ENSG00000130762.10, intron 1 of 14)	ENSG00000130762.10	1965	chr1	3264925	3265633	Intron (ENST00000511072.1/ENSG00000142611.12, intron 3 of 15)	ENSG00000272235.1	-38265
chr1	3374449	3375210	Intron (ENST00000378378.4/ENSG00000130762.10, intron 1 of 14)	ENSG00000130762.10	3459	chr1	3267182	3267397	Intron (ENST00000511072.1/ENSG00000142611.12, intron 3 of 15)	ENSG00000272235.1	-40522
chr1	3376279	3376600	Intron (ENST00000378378.4/ENSG00000130762.10, intron 1 of 14)	ENSG00000130762.10	5289	chr1	3268443	3268724	Intron (ENST00000511072.1/ENSG00000142611.12, intron 3 of 15)	ENSG00000272235.1	-41783
chr1	3377970	3380661	5' UTR	ENSG00000130762.10	-1908	chr1	3268953	3269266	Intron (ENST00000511072.1/ENSG00000142611.12, intron 3 of 15)	ENSG00000272235.1	-42293
chr1	3380843	3381730	Promoter	ENSG00000130762.10	-839	chr1	3270026	3270917	Intron (ENST00000511072.1/ENSG00000142611.12, intron 3 of 15)	ENSG00000142611.12	-42138
chr1	3382007	3383147	Promoter	ENSG00000130762.10	0	chr1	3271129	3271344	Intron (ENST00000511072.1/ENSG00000142611.12, intron 3 of 15)	ENSG00000142611.12	-41711
chr1	3386424	3387766	Promoter	ENSG00000130762.10	-405	chr1	3271849	3272713	Intron (ENST00000511072.1/ENSG00000142611.12, intron 3 of 15)	ENSG00000142611.12	-40342
chr1	3388290	3389421	Promoter	ENSG00000130762.10	0	chr1	3273542	3273902	Intron (ENST00000511072.1/ENSG00000142611.12, intron 3 of 15)	ENSG00000142611.12	-39153
chr1	3389647	3389925	Promoter	ENSG00000130762.10	314	chr1	3274408	3275688	Intron (ENST00000511072.1/ENSG00000142611.12, intron 3 of 15)	ENSG00000142611.12	-37367
chr1	3390492	3391028	Exon (ENST00000464620.1/ENSG00000130762.10, exon 3 of 3)	ENSG00000130762.10	1159	chr1	3276401	3276924	Intron (ENST00000511072.1/ENSG00000142611.12, intron 3 of 15)	ENSG00000142611.12	-36131
chr1	3392382	3392874	Exon (ENST00000378378.4/ENSG00000130762.10, exon 10 of 15)	ENSG00000130762.10	3049	chr1	3277321	3277546	Intron (ENST00000511072.1/ENSG00000142611.12, intron 3 of 15)	ENSG00000142611.12	-35509
chr1	3394071	3395311	Exon (ENST00000378378.4/ENSG00000130762.10, exon 11 of 15)	ENSG00000130762.10	4738	chr1	3278923	3279244	Intron (ENST00000511072.1/ENSG00000142611.12, intron 3 of 15)	ENSG00000142611.12	-33811
chr1	3395539	3395779	Intron (ENST00000378378.4/ENSG00000130762.10, intron 12 of 14)	ENSG00000130762.10	6206	chr1	3279726	3279953	Intron (ENST00000511072.1/ENSG00000142611.12, intron 3 of 15)	ENSG00000142611.12	-33102
chr1	3397844	3398577	Downstream (<=300bp)	ENSG00000272088.1	-5233	chr1	3280120	3280335	Intron (ENST00000511072.1/ENSG00000142611.12, intron 3 of 15)	ENSG00000142611.12	-32720
chr1	3399728	3400789	Distal Intergenic	ENSG00000272088.1	-3021	chr1	3280997	3283021	Intron (ENST00000511072.1/ENSG00000142611.12, intron 3 of 15)	ENSG00000142611.12	-30034
chr1	3401597	3402013	Distal Intergenic	ENSG00000272088.1	-1797	chr1	3284321	3284778	Intron (ENST00000511072.1/ENSG00000142611.12, intron 3 of 15)	ENSG00000142611.12	-28277
chr1	3406050	3406592	3' UTR	ENSG00000272088.1	2240	chr1	3286130	3286535	Intron (ENST00000511072.1/ENSG00000142611.12, intron 3 of 15)	ENSG00000142611.12	-26520
chr1	3406977	3407557	3' UTR	ENSG00000162591.11	2493	chr1	3288758	3291099	Intron (ENST00000511072.1/ENSG00000142611.12, intron 3 of 15)	ENSG00000142611.12	-21956
chr1	3409274	3409555	Promoter	ENSG00000162591.11	495	chr1	3291783	3292124	Intron (ENST00000511072.1/ENSG00000142611.12, intron 3 of 15)	ENSG00000142611.12	-20931
chr1	3409946	3410336	Promoter	ENSG00000162591.11	0	chr1	3292416	3292711	Intron (ENST00000511072.1/ENSG00000142611.12, intron 3 of 15)	ENSG00000142611.12	-20344
chr1	3410737	3410977	Promoter	ENSG00000162591.11	0	chr1	3293450	3294279	Intron (ENST00000511072.1/ENSG00000142611.12, intron 3 of 15)	ENSG00000142611.12	-18776
chr1	3411264	3412866	Promoter	ENSG00000162591.11	0	chr1	3294435	3295270	Intron (ENST00000511072.1/ENSG00000142611.12, intron 3 of 15)	ENSG00000142611.12	-17785
chr1	3413108	3413961	Promoter	ENSG00000162591.11	0	chr1	3296767	3296982	Intron (ENST00000511072.1/ENSG00000142611.12, intron 3 of 15)	ENSG00000142611.12	-16073
chr1	3414342	3418196	Exon (ENST00000294599.4/ENSG00000162591.11, exon 16 of 30)	ENSG00000162591.11	-1061	chr1	3297461	3298454	Intron (ENST00000511072.1/ENSG00000142611.12, intron 3 of 15)	ENSG00000142611.12	-14601
chr1	3419622	3420119	Intron (ENST00000294599.4/ENSG00000162591.11, intron 14 of 29)	ENSG00000162591.11	-6341	chr1	3298702	3299042	Intron (ENST00000511072.1/ENSG00000142611.12, intron 3 of 15)	ENSG00000142611.12	-14013
chr1	3420325	3420694	Intron (ENST00000294599.4/ENSG00000162591.11, intron 14 of 29)	ENSG00000162591.11	-7044	chr1	3299364	3300006	Intron (ENST00000511072.1/ENSG00000142611.12, intron 3 of 15)	ENSG00000142611.12	-13049
chr1	3421025	3421476	Intron (ENST00000294599.4/ENSG00000162591.11, intron 14 of 29)	ENSG00000162591.11	-7744	chr1	3300312	3300665	Intron (ENST00000511072.1/ENSG00000142611.12, intron 3 of 15)	ENSG00000142611.12	-12390
chr1	3421823	3422273	Exon (ENST00000294599.4/ENSG00000162591.11, exon 13 of 30)	ENSG00000162591.11	-8542	chr1	3301374	3301611	Intron (ENST00000511072.1/ENSG00000142611.12, intron 3 of 15)	ENSG00000142611.12	-11444
chr1	3422555	3424833	Exon (ENST00000294599.4/ENSG00000162591.11, exon 11 of 30)	ENSG00000162591.11	-9274	chr1	3302003	3302218	Intron (ENST00000511072.1/ENSG00000142611.12, intron 4 of 15)	ENSG00000142611.12	-10837
chr1	3425094	3425786	Exon (ENST00000294599.4/ENSG00000162591.11, exon 9 of 30)	ENSG00000162591.11	-11813	chr1	3305814	3306172	Intron (ENST00000511072.1/ENSG00000142611.12, intron 4 of 15)	ENSG00000142611.12	-6883
chr1	3425937	3426869	Exon (ENST00000294599.4/ENSG00000162591.11, exon 8 of 30)	ENSG00000162591.11	-12656	chr1	3312196	3312446	Promoter	ENSG00000142611.12	-609
chr1	3427440	3427981	Exon (ENST00000294599.4/ENSG00000162591.11, exon 7 of 30)	ENSG00000162591.11	-14159	chr1	3313084	3313450	Promoter	ENSG00000142611.12	29
chr1	3428288	3429104	Exon (ENST00000294599.4/ENSG00000162591.11, exon 5 of 30)	ENSG00000162591.11	-15007	chr1	3315738	3316278	Intron (ENST00000511072.1/ENSG00000142611.12, intron 5 of 15)	ENSG00000142611.12	2683
chr1	3430853	3431165	Exon (ENST00000294599.4/ENSG00000162591.11, exon 4 of 30)	ENSG00000162591.11	16847	chr1	3317450	3317699	Intron (ENST00000511072.1/ENSG00000142611.12, intron 5 of 15)	ENSG00000142611.12	4395
chr1	3431406	3431646	Intron (ENST00000294599.4/ENSG00000162591.11, intron 3 of 29)	ENSG00000162591.11	16366	chr1	3318465	3319374	Exon (ENST00000511072.1/ENSG00000142611.12, exon 6 of 16)	ENSG00000142611.12	5410
chr1	3432064	3432333	Exon (ENST00000294599.4/ENSG00000162591.11, exon 3 of 30)	ENSG00000162591.11	15679	chr1	3319663	3320291	Intron (ENST00000511072.1/ENSG00000142611.12, intron 6 of 15)	ENSG00000142611.12	6608
chr1	3433531	3433886	Intron (ENST00000294599.4/ENSG00000162591.11, intron 2 of 29)	ENSG00000162591.11	14126	chr1	3320464	3321350	Exon (ENST00000511072.1/ENSG00000142611.12, exon 7 of 16)	ENSG00000142611.12	7409
chr1	3434060	3434300	Intron (ENST00000294599.4/ENSG00000162591.11, intron 2 of 29)	ENSG00000162591.11	13712	chr1	3321657	3322560	Exon (ENST00000511072.1/ENSG00000142611.12, exon 8 of 16)	ENSG00000142611.12	8602
chr1	3435646	3436213	Intron (ENST00000294599.4/ENSG00000162591.11, intron 2 of 29)	ENSG00000162591.11	11799	chr1	3324399	3324829	Intron (ENST00000511072.1/ENSG00000142611.12, intron 8 of 15)	ENSG00000142611.12	11344
chr1	3436520	3437165	Intron (ENST00000294599.4/ENSG00000162591.11, intron 2 of 29)	ENSG00000162591.11	10847	chr1	3325149	3325364	Intron (ENST00000511072.1/ENSG00000142611.12, intron 8 of 15)	ENSG00000142611.12	12094
chr1	3437370	3438319	Intron (ENST00000294599.4/ENSG00000162591.11, intron 2 of 29)	ENSG00000162591.11	9693	chr1	3325821	3326203	Intron (ENST00000511072.1/ENSG00000142611.12, intron 8 of 15)	ENSG00000142611.12	12766
chr1	3439315	3439917	Intron (ENST00000294599.4/ENSG00000162591.11, intron 2 of 29)	ENSG00000162591.11	8095	chr1	3327535	3327772	Intron (ENST00000511072.1/ENSG00000142611.12, intron 8 of 15)	ENSG00000142611.12	-13711
chr1	3440188	3440490	Intron (ENST00000294599.4/ENSG00000162591.11, intron 2 of 29)	ENSG00000162591.11	7522	chr1	3328340	3328643	Exon (ENST00000511072.1/ENSG00000142611.12, exon 9 of 16)	ENSG00000142611.12	-12840
chr1	3440860	3441305	Intron (ENST00000294599.4/ENSG00000162591.11, intron 1 of 29)	ENSG00000162591.11	6707	chr1	3330999	3331818	Exon (ENST00000511072.1/ENSG00000142611.12, exon 10 of 16)	ENSG00000142611.12	-9665
chr1	3441596	3442328	Intron (ENST00000294599.4/ENSG00000162591.11, intron 1 of 29)	ENSG00000162591.11	5684	chr1	3335742	3336127	Intron (ENST00000511072.1/ENSG00000142611.12, intron 12 of 15)	ENSG00000142611.12	-5356
chr1	3442669	3443521	Intron (ENST00000294599.4/ENSG00000162591.11, intron 1 of 29)	ENSG00000162591.11	4491	chr1	3336985	3337521	Intron (ENST00000511072.1/ENSG00000142611.12, intron 12 of 15)	ENSG00000142611.12	-3962
chr1	3444195	3446359	Intron (ENST00000294599.4/ENSG00000162591.11, intron 1 of 29)	ENSG00000162591.11	1653	chr1	3338952	3339185	Intron (ENST00000511072.1/ENSG00000142611.12, intron 12 of 15)	ENSG00000142611.12	-2298
chr1	3446561	3447474	Promoter	ENSG00000162591.11	538	chr1	3339362	3339850	Intron (ENST00000511072.1/ENSG00000142611.12, intron 12 of 15)	ENSG00000142611.12	-1633
chr1	3448325	3449538	Promoter	ENSG00000162591.11	-313	chr1	3340048	3340331	Intron (ENST00000511072.1/ENSG00000142611.12, intron 12 of 15)	ENSG00000142611.12	-1152
chr1	3451178	3452694	Intron (ENST00000356575.4/ENSG00000162591.11, intron 4 of 36)	ENSG00000162591.11	-3166	chr1	3340641	3340872	Promoter	ENSG00000142611.12	-611
chr1	3452851	3453109	Intron (ENST00000356575.4/ENSG00000162591.11, intron 4 of 36)	ENSG00000162591.11	-4839	chr1	3343366	3343804	Intron (ENST00000511072.1/ENSG00000142611.12, intron 14 of 15)	ENSG00000142611.12	1586
chr1	3454406	3454646	Intron (ENST00000356575.4/ENSG00000162591.11, intron 4 of 36)	ENSG00000162591.11	-6394	chr1	3343987	3344742	Intron (ENST00000511072.1/ENSG00000142611.12, intron 14 of 15)	ENSG00000142611.12	2207
chr1	3456719	3458452	Intron (ENST00000356575.4/ENSG00000162591.11, intron 4 of 36)	ENSG00000162591.11	-8707	chr1	3345029	3345698	Intron (ENST00000511072.1/ENSG00000142611.12, intron 14 of 15)	ENSG00000142611.12	3249
chr1	3458737	3459543	Intron (ENST00000356575.4/ENSG00000162591.11, intron 4 of 36)	ENSG00000162591.11	-10725	chr1	3346572	3346818	Intron (ENST00000511072.1/ENSG00000142611.12, intron 14 of 15)	ENSG00000142611.12	4792
chr1	3459693	3460574	Intron (ENST00000356575.4/ENSG00000162591.11, intron 4 of 36)	ENSG00000162591.11	-11681	chr1	3347080	3347688	Exon (ENST00000511072.1/ENSG00000142611.12, exon 15 of 16)	ENSG00000142611.12	5300
chr1	3460879	3461301	Intron (ENST00000356575.4/ENSG00000162591.11, intron 4 of 36)	ENSG00000162591.11	-12867	chr1	3347968	3348613	Exon (ENST00000378398.3/ENSG00000142611.12, exon 17 of 18)	ENSG00000142611.12	6188
chr1	3461648	3462562	Intron (ENST00000356575.4/ENSG00000162591.11, intron 4 of 36)	ENSG00000162591.11	-13636	chr1	3351472	3351870	3' UTR	ENSG00000142611.12	9692
chr1	3462843	3463264	Intron (ENST00000356575.4/ENSG00000162591.11, intron 4 of 36)	ENSG00000207776.1	14090	chr1	3352092	3352768	3' UTR	ENSG00000142611.12	10312
chr1	3464038	3464981	Intron (ENST00000356575.4/ENSG00000162591.11, intron 4 of 36)	ENSG00000207776.1	12373	chr1	3355795	3356182	Distal Intergenic	ENSG00000142611.12	14015
chr1	3465412	3466425	Intron (ENST00000356575.4/ENSG00000162591.11, intron 4 of 36)	ENSG00000207776.1	10929	chr1	3356524	3357312	Distal Intergenic	ENSG00000130762.10	-13678
chr1	3466681	3466987	Intron (ENST00000356575.4/ENSG00000162591.11, intron 4 of 36)	ENSG00000207776.1	10367	chr1	3358187	3358545	Distal Intergenic	ENSG00000130762.10	-12445
chr1	3467379	3468523	Intron (ENST00000356575.4/ENSG00000162591.11, intron 4 of 36)	ENSG00000207776.1	8831	chr1	3358761	3359055	Distal Intergenic	ENSG00000130762.10	-11935
chr1	3468752	3469118	Intron (ENST00000356575.4/ENSG00000162591.11, intron 4 of 36)	ENSG00000207776.1	8236	chr1	3359412	3359638	Distal Intergenic	ENSG00000130762.10	-11352
chr1	3471679	3473583	Intron (ENST00000356575.4/ENSG00000162591.11, intron 4 of 36)	ENSG00000207776.1	3771	chr1	3361214	3361687	Distal Intergenic	ENSG00000130762.10	-9303
chr1	3473880	3474864	Intron (ENST00000356575.4/ENSG00000162591.11, intron 4 of 36)	ENSG00000207776.1	2490	chr1	3361916	3362131	Distal Intergenic	ENSG00000130762.10	-8859
chr1	3475115	3475481	Intron (ENST00000356575.4/ENSG00000162591.11, intron 4 of 36)	ENSG00000207776.1	1873	chr1	3368657	3369011	Distal Intergenic	ENSG00000130762.10	-1979
chr1	3477437	3477811	Promoter	ENSG00000207776.1	-83	chr1	3372788	3373133	Intron (ENST00000378378.4/ENSG00000130762.10, intron 1 of 14)	ENSG00000130762.10	1798
chr1	3477975	3478324	Promoter	ENSG00000207776.1	-621	chr1	3373345	3374440	Intron (ENST00000378378.4/ENSG00000130762.10, intron 1 of 14)	ENSG00000130762.10	2355
chr1	3478743	3479311	Intron (ENST00000356575.4/ENSG00000162591.11, intron 4 of 36)	ENSG00000207776.1	-1389	chr1	3374901	3375568	Intron (ENST00000378378.4/ENSG00000130762.10, intron 1 of 14)	ENSG00000130762.10	3911
chr1	3480839	3481080	Intron (ENST00000356575.4/ENSG00000162591.11, intron 4 of 36)	ENSG00000207776.1	-3485	chr1	3376002	3376448	Intron (ENST00000378378.4/ENSG00000130762.10, intron 1 of 14)	ENSG00000130762.10	5012
chr1	3482743	3484626	Intron (ENST00000356575.4/ENSG00000162591.11, intron 4 of 36)	ENSG00000207776.1	-5389	chr1	3376996	3377389	Intron (ENST00000378378.4/ENSG00000130762.10, intron 1 of 14)	ENSG00000130762.10	-5180
chr1	3485759	3487617	Intron (ENST00000356575.4/ENSG00000162591.11, intron 4 of 36)	ENSG00000207776.1	-8405	chr1	3378129	3378349	Intron (ENST00000378378.4/ENSG00000130762.10, intron 1 of 14)	ENSG00000130762.10	-4220
chr1	3487823	3488214	Intron (ENST00000356575.4/ENSG00000162591.11, intron 4 of 36)	ENSG00000207776.1	-10469	chr1	3379051	3380007	5' UTR	ENSG00000130762.10	-2562
chr1	3490330	3490789	Intron (ENST00000356575.4/ENSG00000162591.11, intron 4 of 36)	ENSG00000207776.1	-12976	chr1	3380549	3381389	Intron (ENST00000378378.4/ENSG00000130762.10, intron 2 of 14)	ENSG00000130762.10	-1180
chr1	3491447	3491877	Intron (ENST00000356575.4/ENSG00000162591.11, intron 4 of 36)	ENSG00000207776.1	-14093	chr1	3381795	3382602	Promoter	ENSG00000130762.10	0
chr1	3492902	3493282	Intron (ENST00000356575.4/ENSG00000162591.11, intron 4 of 36)	ENSG00000207776.1	-15548	chr1	3382748	3383205	Promoter	ENSG00000130762.10	179
chr1	3493762	3494391	Intron (ENST00000356575.4/ENSG00000162591.11, intron 4 of 36)	ENSG00000207776.1	-16408	chr1	3383498	3384282	Promoter	ENSG00000130762.10	0
chr1	3494648	3495423	Intron (ENST00000356575.4/ENSG00000162591.11, intron 4 of 36)	ENSG00000207776.1	-17294	chr1	3385069	3385669	Promoter	ENSG00000130762.10	0
chr1	3495573	3495934	Intron (ENST00000356575.4/ENSG00000162591.11, intron 4 of 36)	ENSG00000207776.1	-18219	chr1	3385883	3387781	Promoter	ENSG00000130762.10	-390
chr1	3500372	3500841	Intron (ENST00000356575.4/ENSG00000162591.11, intron 3 of 36)	ENSG00000207776.1	-23018	chr1	3388389	3388931	Promoter	ENSG00000130762.10	201
chr1	3501188	3501751	Intron (ENST00000356575.4/ENSG00000162591.11, intron 3 of 36)	ENSG00000207776.1	-23834	chr1	3389867	3390814	Promoter	ENSG00000130762.10	534
chr1	3502120	3502452	Intron (ENST00000356575.4/ENSG00000162591.11, intron 3 of 36)	ENSG00000207776.1	-24766	chr1	3391176	3391456	Exon (ENST00000378378.4/ENSG00000130762.10, exon 9 of 15)	ENSG00000130762.10	1843
chr1	3503323	3503709	Intron (ENST00000356575.4/ENSG00000162591.11, intron 3 of 36)	ENSG00000162591.11	24132	chr1	3392306	3392748	Exon (ENST00000378378.4/ENSG00000130762.10, exon 10 of 15)	ENSG00000130762.10	2973
chr1	3505404	3505803	Intron (ENST00000356575.4/ENSG00000162591.11, intron 3 of 36)	ENSG00000162591.11	22038	chr1	3393117	3393708	Intron (ENST00000378378.4/ENSG00000130762.10, intron 10 of 14)	ENSG00000130762.10	3784
chr1	3507157	3508174	Intron (ENST00000356575.4/ENSG00000162591.11, intron 3 of 36)	ENSG00000162591.11	19667	chr1	3394296	3395256	Exon (ENST00000378378.4/ENSG00000130762.10, exon 11 of 15)	ENSG00000130762.10	4963
chr1	3508668	3509309	Intron (ENST00000356575.4/ENSG00000162591.11, intron 3 of 36)	ENSG00000162591.11	18532	chr1	3395610	3395825	Intron (ENST00000378378.4/ENSG00000130762.10, intron 12 of 14)	ENSG00000130762.10	6277
chr1	3509488	3509949	Intron (ENST00000356575.4/ENSG00000162591.11, intron 3 of 36)	ENSG00000162591.11	17892	chr1	3396344	3396576	Exon (ENST00000378378.4/ENSG00000130762.10, exon 14 of 15)	ENSG00000130762.10	7011
chr1	3510431	3510994	Intron (ENST00000356575.4/ENSG00000162591.11, intron 3 of 36)	ENSG00000162591.11	16847	chr1	3396891	3397124	Exon (ENST00000378378.4/ENSG00000130762.10, exon 15 of 15)	ENSG00000272088.1	-6686
chr1	3511387	3511726	Intron (ENST00000356575.4/ENSG00000162591.11, intron 3 of 36)	ENSG00000162591.11	16115	chr1	3397874	3398724	Downstream (<=300bp)	ENSG00000272088.1	-5086
chr1	3512061	3512537	Intron (ENST00000356575.4/ENSG00000162591.11, intron 2 of 36)	ENSG00000162591.11	15304	chr1	3398895	3399964	Distal Intergenic	ENSG00000272088.1	-3846
chr1	3513315	3514766	Intron (ENST00000356575.4/ENSG00000162591.11, intron 2 of 36)	ENSG00000162591.11	13075	chr1	3406162	3407171	3' UTR	ENSG00000272088.1	2352
chr1	3515048	3515288	Intron (ENST00000356575.4/ENSG00000162591.11, intron 2 of 36)	ENSG00000162591.11	12553	chr1	3409431	3409916	Promoter	ENSG00000162591.11	134
chr1	3515460	3516288	Intron (ENST00000356575.4/ENSG00000162591.11, intron 2 of 36)	ENSG00000162591.11	11553	chr1	3410253	3411075	Promoter	ENSG00000162591.11	0
chr1	3516714	3518465	Intron (ENST00000356575.4/ENSG00000162591.11, intron 2 of 36)	ENSG00000162591.11	9376	chr1	3411427	3411913	Promoter	ENSG00000162591.11	-619
chr1	3518625	3519051	Exon (ENST00000356575.4/ENSG00000162591.11, exon 2 of 37)	ENSG00000162591.11	8790	chr1	3412253	3412526	Promoter	ENSG00000162591.11	52
chr1	3519763	3520823	Intron (ENST00000356575.4/ENSG00000162591.11, intron 1 of 36)	ENSG00000162591.11	7018	chr1	3413060	3413398	Promoter	ENSG00000162591.11	0
chr1	3524318	3525693	Intron (ENST00000356575.4/ENSG00000162591.11, intron 1 of 36)	ENSG00000162591.11	2148	chr1	3414051	3414378	Promoter	ENSG00000162591.11	-770
chr1	3525897	3526206	Intron (ENST00000356575.4/ENSG00000162591.11, intron 1 of 36)	ENSG00000162591.11	1635	chr1	3415175	3416100	Exon (ENST00000356575.4/ENSG00000162591.11, exon 24 of 37)	ENSG00000162591.11	-1894
chr1	3526447	3526777	Intron (ENST00000356575.4/ENSG00000162591.11, intron 1 of 36)	ENSG00000162591.11	1064	chr1	3416273	3417909	Exon (ENST00000294599.4/ENSG00000162591.11, exon 16 of 30)	ENSG00000162591.11	-2992
chr1	3528752	3528992	Promoter	ENSG00000162591.11	-693	chr1	3418109	3418484	Exon (ENST00000294599.4/ENSG00000162591.11, exon 15 of 30)	ENSG00000162591.11	-4828
chr1	3531074	3531376	Distal Intergenic	ENSG00000162591.11	-3015	chr1	3421063	3421280	Intron (ENST00000294599.4/ENSG00000162591.11, intron 14 of 29)	ENSG00000162591.11	-7782
chr1	3533296	3533536	Distal Intergenic	ENSG00000162591.11	-5237	chr1	3421850	3422109	Exon (ENST00000294599.4/ENSG00000162591.11, exon 13 of 30)	ENSG00000162591.11	-8569
chr1	3544465	3544799	Intron (ENST00000378344.2/ENSG00000158109.10, intron 4 of 4)	ENSG00000158109.10	2851	chr1	3422442	3422903	Exon (ENST00000294599.4/ENSG00000162591.11, exon 12 of 30)	ENSG00000162591.11	-9161
chr1	3546519	3546883	3' UTR	ENSG00000158109.10	4905	chr1	3423142	3423605	Intron (ENST00000294599.4/ENSG00000162591.11, intron 11 of 29)	ENSG00000162591.11	-9861
chr1	3548880	3549152	Exon (ENST00000378322.3/ENSG00000116213.11, exon 10 of 11)	ENSG00000116213.11	2845	chr1	3424629	3425918	Exon (ENST00000294599.4/ENSG00000162591.11, exon 9 of 30)	ENSG00000162591.11	-11348
chr1	3549603	3550564	Exon (ENST00000378322.3/ENSG00000116213.11, exon 9 of 11)	ENSG00000116213.11	1433	chr1	3426144	3426514	Exon (ENST00000294599.4/ENSG00000162591.11, exon 8 of 30)	ENSG00000162591.11	-12863
chr1	3558018	3558518	Intron (ENST00000378322.3/ENSG00000116213.11, intron 3 of 10)	ENSG00000116213.11	-1829	chr1	3426682	3427815	Exon (ENST00000294599.4/ENSG00000162591.11, exon 7 of 30)	ENSG00000162591.11	-13401
chr1	3561431	3561745	Intron (ENST00000378322.3/ENSG00000116213.11, intron 3 of 10)	ENSG00000116213.11	4845	chr1	3428012	3428227	Exon (ENST00000294599.4/ENSG00000162591.11, exon 6 of 30)	ENSG00000162591.11	-14731
chr1	3567413	3567733	Promoter	ENSG00000116213.11	-776	chr1	3431001	3431691	Exon (ENST00000294599.4/ENSG00000162591.11, exon 4 of 30)	ENSG00000162591.11	16321
chr1	3570091	3570694	Promoter	ENSG00000116213.11	-766	chr1	3432185	3432400	Intron (ENST00000294599.4/ENSG00000162591.11, intron 2 of 29)	ENSG00000162591.11	15612
chr1	3572602	3572842	Intron (ENST00000378295.4/ENSG00000078900.10, intron 1 of 13)	ENSG00000116213.11	-3277	chr1	3432605	3433710	Intron (ENST00000294599.4/ENSG00000162591.11, intron 2 of 29)	ENSG00000162591.11	14302
chr1	3580406	3580786	Intron (ENST00000378295.4/ENSG00000078900.10, intron 1 of 13)	ENSG00000227589.1	4550	chr1	3434596	3434834	Intron (ENST00000294599.4/ENSG00000162591.11, intron 2 of 29)	ENSG00000162591.11	13178
chr1	3583411	3583716	Intron (ENST00000378295.4/ENSG00000078900.10, intron 1 of 13)	ENSG00000227589.1	1620	chr1	3435366	3436664	Intron (ENST00000294599.4/ENSG00000162591.11, intron 2 of 29)	ENSG00000162591.11	11348
chr1	3586389	3587130	Intron (ENST00000378295.4/ENSG00000078900.10, intron 1 of 13)	ENSG00000227589.1	-1053	chr1	3437693	3439188	Intron (ENST00000294599.4/ENSG00000162591.11, intron 2 of 29)	ENSG00000162591.11	8824
chr1	3588254	3588832	Intron (ENST00000378295.4/ENSG00000078900.10, intron 1 of 13)	ENSG00000227589.1	-2918	chr1	3439820	3441119	Exon (ENST00000294599.4/ENSG00000162591.11, exon 2 of 30)	ENSG00000162591.11	6893
chr1	3589113	3589409	Intron (ENST00000378295.4/ENSG00000078900.10, intron 1 of 13)	ENSG00000227589.1	-3777	chr1	3441359	3441857	Intron (ENST00000294599.4/ENSG00000162591.11, intron 1 of 29)	ENSG00000162591.11	6155
chr1	3592452	3592790	Intron (ENST00000378295.4/ENSG00000078900.10, intron 1 of 13)	ENSG00000078900.10	-6140	chr1	3442117	3442544	Intron (ENST00000294599.4/ENSG00000162591.11, intron 1 of 29)	ENSG00000162591.11	5468
chr1	3593575	3593886	Intron (ENST00000378295.4/ENSG00000078900.10, intron 1 of 13)	ENSG00000078900.10	-5044	chr1	3443274	3443676	Intron (ENST00000294599.4/ENSG00000162591.11, intron 1 of 29)	ENSG00000162591.11	4336
chr1	3594935	3595175	Intron (ENST00000378295.4/ENSG00000078900.10, intron 1 of 13)	ENSG00000078900.10	-3755	chr1	3443842	3444155	Intron (ENST00000294599.4/ENSG00000162591.11, intron 1 of 29)	ENSG00000162591.11	3857
chr1	3598452	3599898	Promoter	ENSG00000078900.10	0	chr1	3444519	3446017	Intron (ENST00000294599.4/ENSG00000162591.11, intron 1 of 29)	ENSG00000162591.11	1995
chr1	3600356	3601063	Intron (ENST00000378295.4/ENSG00000078900.10, intron 3 of 13)	ENSG00000078900.10	1426	chr1	3446227	3446639	Intron (ENST00000294599.4/ENSG00000162591.11, intron 1 of 29)	ENSG00000162591.11	1373
chr1	3602097	3602545	Intron (ENST00000378295.4/ENSG00000078900.10, intron 3 of 13)	ENSG00000078900.10	3167	chr1	3447034	3447366	Promoter	ENSG00000162591.11	646
chr1	3603286	3604344	Intron (ENST00000378295.4/ENSG00000078900.10, intron 3 of 13)	ENSG00000078900.10	-2892	chr1	3449216	3450566	Intron (ENST00000356575.4/ENSG00000162591.11, intron 4 of 36)	ENSG00000162591.11	-1204
chr1	3604586	3605132	Intron (ENST00000378295.4/ENSG00000078900.10, intron 3 of 13)	ENSG00000078900.10	-2104	chr1	3451332	3451547	Intron (ENST00000356575.4/ENSG00000162591.11, intron 4 of 36)	ENSG00000162591.11	-3320
chr1	3605689	3606517	Promoter	ENSG00000078900.10	-719	chr1	3452147	3452628	Intron (ENST00000356575.4/ENSG00000162591.11, intron 4 of 36)	ENSG00000162591.11	-4135
chr1	3607293	3607542	Promoter	ENSG00000078900.10	22	chr1	3453366	3453581	Intron (ENST00000356575.4/ENSG00000162591.11, intron 4 of 36)	ENSG00000162591.11	-5354
chr1	3607737	3609780	Promoter	ENSG00000078900.10	466	chr1	3453770	3454523	Intron (ENST00000356575.4/ENSG00000162591.11, intron 4 of 36)	ENSG00000162591.11	-5758
chr1	3612788	3613028	Intron (ENST00000378295.4/ENSG00000078900.10, intron 3 of 13)	ENSG00000078900.10	-1582	chr1	3454685	3455080	Intron (ENST00000356575.4/ENSG00000162591.11, intron 4 of 36)	ENSG00000162591.11	-6673
chr1	3614519	3614823	Promoter	ENSG00000078900.10	0	chr1	3456338	3457120	Intron (ENST00000356575.4/ENSG00000162591.11, intron 4 of 36)	ENSG00000162591.11	-8326
chr1	3617823	3618683	Intron (ENST00000378295.4/ENSG00000078900.10, intron 3 of 13)	ENSG00000078900.10	3201	chr1	3457989	3458208	Intron (ENST00000356575.4/ENSG00000162591.11, intron 4 of 36)	ENSG00000162591.11	-9977
chr1	3621819	3622123	Intron (ENST00000378295.4/ENSG00000078900.10, intron 3 of 13)	ENSG00000078900.10	7197	chr1	3459593	3460187	Intron (ENST00000356575.4/ENSG00000162591.11, intron 4 of 36)	ENSG00000162591.11	-11581
chr1	3622399	3623526	Intron (ENST00000378295.4/ENSG00000078900.10, intron 3 of 13)	ENSG00000235131.1	7336	chr1	3460614	3460974	Intron (ENST00000356575.4/ENSG00000162591.11, intron 4 of 36)	ENSG00000162591.11	-12602
chr1	3623914	3625395	5' UTR	ENSG00000235131.1	5467	chr1	3461743	3462425	Intron (ENST00000356575.4/ENSG00000162591.11, intron 4 of 36)	ENSG00000162591.11	-13731
chr1	3627062	3627302	Intron (ENST00000378295.4/ENSG00000078900.10, intron 4 of 13)	ENSG00000235131.1	3560	chr1	3462670	3463088	Intron (ENST00000356575.4/ENSG00000162591.11, intron 4 of 36)	ENSG00000207776.1	14266
chr1	3628208	3628448	Intron (ENST00000378295.4/ENSG00000078900.10, intron 4 of 13)	ENSG00000235131.1	2414	chr1	3463551	3464319	Exon (ENST00000485002.2/ENSG00000162591.11, exon 4 of 37)	ENSG00000207776.1	13035
chr1	3628973	3629306	Exon (ENST00000416554.1/ENSG00000235131.1, exon 2 of 2)	ENSG00000235131.1	1556	chr1	3464636	3465034	Intron (ENST00000356575.4/ENSG00000162591.11, intron 4 of 36)	ENSG00000207776.1	12320
chr1	3630056	3631006	Promoter	ENSG00000235131.1	0	chr1	3465270	3465528	Intron (ENST00000356575.4/ENSG00000162591.11, intron 4 of 36)	ENSG00000207776.1	11826
chr1	3631656	3633100	Promoter	ENSG00000235131.1	-794	chr1	3465687	3466575	Intron (ENST00000356575.4/ENSG00000162591.11, intron 4 of 36)	ENSG00000207776.1	10779
chr1	3634179	3635478	Intron (ENST00000378295.4/ENSG00000078900.10, intron 4 of 13)	ENSG00000235131.1	-3317	chr1	3466845	3467288	Intron (ENST00000356575.4/ENSG00000162591.11, intron 4 of 36)	ENSG00000207776.1	10066
chr1	3635757	3636068	Intron (ENST00000378295.4/ENSG00000078900.10, intron 4 of 13)	ENSG00000235131.1	-4895	chr1	3468457	3468785	Intron (ENST00000356575.4/ENSG00000162591.11, intron 4 of 36)	ENSG00000207776.1	8569
chr1	3636885	3637333	Intron (ENST00000378295.4/ENSG00000078900.10, intron 4 of 13)	ENSG00000235131.1	-6023	chr1	3469504	3470561	Intron (ENST00000356575.4/ENSG00000162591.11, intron 4 of 36)	ENSG00000207776.1	6793
chr1	3638089	3639516	Exon (ENST00000378295.4/ENSG00000078900.10, exon 5 of 14)	ENSG00000078900.10	-4526	chr1	3472419	3473506	Intron (ENST00000356575.4/ENSG00000162591.11, intron 4 of 36)	ENSG00000207776.1	3848
chr1	3639750	3640771	Exon (ENST00000378295.4/ENSG00000078900.10, exon 6 of 14)	ENSG00000078900.10	-3271	chr1	3474007	3474310	Intron (ENST00000356575.4/ENSG00000162591.11, intron 4 of 36)	ENSG00000207776.1	3044
chr1	3641808	3642178	Intron (ENST00000378295.4/ENSG00000078900.10, intron 6 of 13)	ENSG00000078900.10	-1864	chr1	3474723	3475008	Intron (ENST00000356575.4/ENSG00000162591.11, intron 4 of 36)	ENSG00000207776.1	2346
chr1	3643900	3644243	Promoter	ENSG00000078900.10	0	chr1	3476612	3476827	Promoter	ENSG00000207776.1	527
chr1	3644818	3645179	Promoter	ENSG00000078900.10	776	chr1	3477426	3477709	Promoter	ENSG00000207776.1	-72
chr1	3645689	3646053	Exon (ENST00000378295.4/ENSG00000078900.10, exon 10 of 14)	ENSG00000078900.10	1647	chr1	3477922	3478325	Promoter	ENSG00000207776.1	-568
chr1	3647501	3647954	Exon (ENST00000378295.4/ENSG00000078900.10, exon 12 of 14)	ENSG00000078900.10	3459	chr1	3479214	3479505	Intron (ENST00000356575.4/ENSG00000162591.11, intron 4 of 36)	ENSG00000207776.1	-1860
chr1	3648972	3649254	Intron (ENST00000378295.4/ENSG00000078900.10, intron 13 of 13)	ENSG00000078900.10	4930	chr1	3480040	3480630	Intron (ENST00000356575.4/ENSG00000162591.11, intron 4 of 36)	ENSG00000207776.1	-2686
chr1	3649710	3650054	3' UTR	ENSG00000227372.6	4385	chr1	3481036	3481322	Intron (ENST00000356575.4/ENSG00000162591.11, intron 4 of 36)	ENSG00000207776.1	-3682
chr1	3651001	3651301	3' UTR	ENSG00000227372.6	3138	chr1	3481749	3482392	Intron (ENST00000356575.4/ENSG00000162591.11, intron 4 of 36)	ENSG00000207776.1	-4395
chr1	3658645	3659460	Promoter	ENSG00000227372.6	0	chr1	3483117	3484449	Intron (ENST00000356575.4/ENSG00000162591.11, intron 4 of 36)	ENSG00000207776.1	-5763
chr1	3662061	3662354	Promoter	ENSG00000227372.6	448	chr1	3484894	3485287	Intron (ENST00000356575.4/ENSG00000162591.11, intron 4 of 36)	ENSG00000207776.1	-7540
chr1	3662567	3663022	Promoter	ENSG00000227372.6	0	chr1	3486623	3486879	Intron (ENST00000356575.4/ENSG00000162591.11, intron 4 of 36)	ENSG00000207776.1	-9269
chr1	3668765	3669266	Promoter	ENSG00000162592.4	0	chr1	3487164	3487428	Intron (ENST00000356575.4/ENSG00000162591.11, intron 4 of 36)	ENSG00000207776.1	-9810
chr1	3669425	3670240	Promoter	ENSG00000162592.4	416	chr1	3487890	3488197	Intron (ENST00000356575.4/ENSG00000162591.11, intron 4 of 36)	ENSG00000207776.1	-10536
chr1	3677302	3677552	Intron (ENST00000294600.2/ENSG00000162592.4, intron 4 of 11)	ENSG00000162592.4	8293	chr1	3488650	3489935	Intron (ENST00000356575.4/ENSG00000162591.11, intron 4 of 36)	ENSG00000207776.1	-11296
chr1	3678245	3678636	Intron (ENST00000294600.2/ENSG00000162592.4, intron 5 of 11)	ENSG00000162592.4	9236	chr1	3490202	3491030	Intron (ENST00000356575.4/ENSG00000162591.11, intron 4 of 36)	ENSG00000207776.1	-12848
chr1	3679525	3679932	3' UTR	ENSG00000235169.3	-9420	chr1	3491579	3491795	Intron (ENST00000356575.4/ENSG00000162591.11, intron 4 of 36)	ENSG00000207776.1	-14225
chr1	3680116	3680572	3' UTR	ENSG00000235169.3	-8780	chr1	3492464	3492789	Intron (ENST00000356575.4/ENSG00000162591.11, intron 4 of 36)	ENSG00000207776.1	-15110
chr1	3686232	3686605	3' UTR	ENSG00000235169.3	-2747	chr1	3493030	3495636	Intron (ENST00000356575.4/ENSG00000162591.11, intron 4 of 36)	ENSG00000207776.1	-15676
chr1	3686763	3687335	Intron (ENST00000294600.2/ENSG00000162592.4, intron 11 of 11)	ENSG00000235169.3	-2017	chr1	3495873	3496136	Intron (ENST00000356575.4/ENSG00000162591.11, intron 4 of 36)	ENSG00000207776.1	-18519
chr1	3687653	3687906	Intron (ENST00000294600.2/ENSG00000162592.4, intron 11 of 11)	ENSG00000235169.3	-1446	chr1	3496284	3496658	Exon (ENST00000356575.4/ENSG00000162591.11, exon 4 of 37)	ENSG00000207776.1	-18930
chr1	3690107	3690538	Promoter	ENSG00000235169.3	480	chr1	3497911	3498306	Intron (ENST00000356575.4/ENSG00000162591.11, intron 3 of 36)	ENSG00000207776.1	-20557
chr1	3690691	3691026	Intron (ENST00000444870.2/ENSG00000235169.3, intron 2 of 3)	ENSG00000235169.3	1064	chr1	3499143	3499662	Intron (ENST00000356575.4/ENSG00000162591.11, intron 3 of 36)	ENSG00000207776.1	-21789
chr1	3693405	3694527	Distal Intergenic	ENSG00000235169.3	3778	chr1	3500722	3501255	Intron (ENST00000356575.4/ENSG00000162591.11, intron 3 of 36)	ENSG00000207776.1	-23368
chr1	3695315	3695722	Distal Intergenic	ENSG00000266075.1	-3657	chr1	3502468	3503372	Intron (ENST00000356575.4/ENSG00000162591.11, intron 3 of 36)	ENSG00000162591.11	24469
chr1	3701156	3701415	Promoter	ENSG00000272153.1	-157	chr1	3503904	3504268	Intron (ENST00000356575.4/ENSG00000162591.11, intron 3 of 36)	ENSG00000162591.11	23573
chr1	3704414	3704654	Intron (ENST00000378251.1/ENSG00000130764.5, intron 1 of 6)	ENSG00000272153.1	2842	chr1	3505150	3505543	Intron (ENST00000356575.4/ENSG00000162591.11, intron 3 of 36)	ENSG00000162591.11	22298
chr1	3704816	3705199	Intron (ENST00000378251.1/ENSG00000130764.5, intron 1 of 6)	ENSG00000272153.1	3244	chr1	3505987	3506233	Intron (ENST00000356575.4/ENSG00000162591.11, intron 3 of 36)	ENSG00000162591.11	21608
chr1	3706418	3706757	Intron (ENST00000378251.1/ENSG00000130764.5, intron 1 of 6)	ENSG00000272153.1	4846	chr1	3507044	3507259	Intron (ENST00000356575.4/ENSG00000162591.11, intron 3 of 36)	ENSG00000162591.11	20582
chr1	3707696	3708797	Intron (ENST00000378251.1/ENSG00000130764.5, intron 1 of 6)	ENSG00000130764.5	4271	chr1	3507445	3507673	Intron (ENST00000356575.4/ENSG00000162591.11, intron 3 of 36)	ENSG00000162591.11	20168
chr1	3709827	3710067	Intron (ENST00000378251.1/ENSG00000130764.5, intron 1 of 6)	ENSG00000130764.5	3001	chr1	3510430	3510871	Intron (ENST00000356575.4/ENSG00000162591.11, intron 3 of 36)	ENSG00000162591.11	16970
chr1	3715456	3715796	Distal Intergenic	ENSG00000130764.5	-2388	chr1	3511067	3511314	Intron (ENST00000356575.4/ENSG00000162591.11, intron 3 of 36)	ENSG00000162591.11	16527
chr1	3726210	3726453	Distal Intergenic	ENSG00000116198.8	6569	chr1	3512167	3513166	Intron (ENST00000356575.4/ENSG00000162591.11, intron 2 of 36)	ENSG00000162591.11	14675
chr1	3731476	3731981	3' UTR	ENSG00000116198.8	1041	chr1	3513540	3515040	Intron (ENST00000356575.4/ENSG00000162591.11, intron 2 of 36)	ENSG00000162591.11	12801
chr1	3732372	3732644	Promoter	ENSG00000116198.8	378	chr1	3516689	3517960	Intron (ENST00000356575.4/ENSG00000162591.11, intron 2 of 36)	ENSG00000162591.11	9881
chr1	3733367	3733771	Promoter	ENSG00000116198.8	-345	chr1	3518719	3519071	Exon (ENST00000356575.4/ENSG00000162591.11, exon 2 of 37)	ENSG00000162591.11	8770
chr1	3734213	3735145	Intron (ENST00000378230.3/ENSG00000116198.8, intron 20 of 21)	ENSG00000116198.8	-1191	chr1	3519294	3521331	Intron (ENST00000356575.4/ENSG00000162591.11, intron 1 of 36)	ENSG00000162591.11	6510
chr1	3738225	3738544	Intron (ENST00000378230.3/ENSG00000116198.8, intron 20 of 21)	ENSG00000116198.8	-5203	chr1	3522957	3523215	Intron (ENST00000356575.4/ENSG00000162591.11, intron 1 of 36)	ENSG00000162591.11	4626
chr1	3738722	3739243	Intron (ENST00000378230.3/ENSG00000116198.8, intron 20 of 21)	ENSG00000116198.8	-5700	chr1	3523562	3523872	Intron (ENST00000356575.4/ENSG00000162591.11, intron 1 of 36)	ENSG00000162591.11	3969
chr1	3741627	3742591	Exon (ENST00000378230.3/ENSG00000116198.8, exon 18 of 22)	ENSG00000116198.8	3279	chr1	3524137	3524394	Intron (ENST00000356575.4/ENSG00000162591.11, intron 1 of 36)	ENSG00000162591.11	3447
chr1	3744193	3744433	Intron (ENST00000378230.3/ENSG00000116198.8, intron 15 of 21)	ENSG00000116198.8	1437	chr1	3525290	3526488	Intron (ENST00000356575.4/ENSG00000162591.11, intron 1 of 36)	ENSG00000162591.11	1353
chr1	3746445	3746685	Promoter	ENSG00000116198.8	-508	chr1	3528398	3528897	Promoter	ENSG00000162591.11	-339
chr1	3751575	3751950	Exon (ENST00000378230.3/ENSG00000116198.8, exon 11 of 22)	ENSG00000116198.8	1750	chr1	3529285	3529565	Distal Intergenic	ENSG00000162591.11	-1226
chr1	3754737	3755420	Promoter	ENSG00000116198.8	254	chr1	3530633	3530848	Distal Intergenic	ENSG00000162591.11	-2574
chr1	3758441	3758922	Intron (ENST00000378230.3/ENSG00000116198.8, intron 6 of 21)	ENSG00000116198.8	-2767	chr1	3532360	3532575	Distal Intergenic	ENSG00000162591.11	-4301
chr1	3759485	3759766	3' UTR	ENSG00000116198.8	-3811	chr1	3535046	3535635	Distal Intergenic	ENSG00000238260.1	5672
chr1	3774511	3774751	Promoter	ENSG00000169598.11	347	chr1	3547564	3547979	3' UTR	ENSG00000116213.11	4018
chr1	3775454	3775736	Intron (ENST00000341385.3/ENSG00000169598.11, intron 2 of 2)	ENSG00000169598.11	1290	chr1	3551771	3551986	Promoter	ENSG00000116213.11	11
chr1	3776016	3776399	Intron (ENST00000341385.3/ENSG00000169598.11, intron 2 of 2)	ENSG00000169598.11	1852	chr1	3552738	3553058	Promoter	ENSG00000116213.11	563
chr1	3789255	3789725	3' UTR	ENSG00000169598.11	5028	chr1	3557257	3557472	Intron (ENST00000378322.3/ENSG00000116213.11, intron 3 of 10)	ENSG00000116213.11	-1068
chr1	3793287	3793756	Intron (ENST00000378209.3/ENSG00000169598.11, intron 6 of 6)	ENSG00000169598.11	-6315	chr1	3558871	3559136	Intron (ENST00000378322.3/ENSG00000116213.11, intron 3 of 10)	ENSG00000116213.11	-2682
chr1	3797292	3797828	Intron (ENST00000378209.3/ENSG00000169598.11, intron 6 of 6)	ENSG00000169598.11	-2243	chr1	3561641	3561856	Intron (ENST00000378322.3/ENSG00000116213.11, intron 3 of 10)	ENSG00000116213.11	4734
chr1	3802375	3802615	Distal Intergenic	ENSG00000264428.1	1747	chr1	3566123	3566338	Promoter	ENSG00000116213.11	252
chr1	3811267	3811685	Intron (ENST00000486765.1/ENSG00000198912.6, intron 2 of 4)	ENSG00000198912.6	5126	chr1	3583113	3583371	Intron (ENST00000378295.4/ENSG00000078900.10, intron 1 of 13)	ENSG00000227589.1	1965
chr1	3819997	3820591	Exon (ENST00000413332.1/ENSG00000236423.1, exon 2 of 3)	ENSG00000236423.1	3017	chr1	3583753	3584121	Intron (ENST00000378295.4/ENSG00000078900.10, intron 1 of 13)	ENSG00000227589.1	1215
chr1	3821026	3821484	Intron (ENST00000413332.1/ENSG00000236423.1, intron 2 of 2)	ENSG00000236423.1	4046	chr1	3587373	3587605	Intron (ENST00000378295.4/ENSG00000078900.10, intron 1 of 13)	ENSG00000227589.1	-2037
chr1	3823147	3823511	Intron (ENST00000442673.1/ENSG00000236423.1, intron 1 of 1)	ENSG00000236423.1	6167	chr1	3588233	3588554	Intron (ENST00000378295.4/ENSG00000078900.10, intron 1 of 13)	ENSG00000227589.1	-2897
chr1	3823730	3824452	Intron (ENST00000442673.1/ENSG00000236423.1, intron 1 of 1)	ENSG00000236423.1	6750	chr1	3589640	3590030	Intron (ENST00000378295.4/ENSG00000078900.10, intron 1 of 13)	ENSG00000227589.1	-4304
chr1	3826798	3827046	Intron (ENST00000442673.1/ENSG00000236423.1, intron 1 of 1)	ENSG00000236423.1	9818	chr1	3590983	3591198	Intron (ENST00000378295.4/ENSG00000078900.10, intron 1 of 13)	ENSG00000227589.1	-5647
chr1	3828424	3828963	Intron (ENST00000442673.1/ENSG00000236423.1, intron 1 of 1)	ENSG00000236423.1	11444	chr1	3591942	3592624	Intron (ENST00000378295.4/ENSG00000078900.10, intron 1 of 13)	ENSG00000078900.10	-6306
chr1	3829123	3829845	Intron (ENST00000442673.1/ENSG00000236423.1, intron 1 of 1)	ENSG00000236423.1	12143	chr1	3592808	3593031	Intron (ENST00000378295.4/ENSG00000078900.10, intron 1 of 13)	ENSG00000078900.10	-5899
chr1	3830198	3830563	Exon (ENST00000439488.1/ENSG00000236423.1, exon 3 of 4)	ENSG00000236423.1	13218	chr1	3593729	3594105	Intron (ENST00000378295.4/ENSG00000078900.10, intron 1 of 13)	ENSG00000078900.10	-4825
chr1	3831300	3831751	Exon (ENST00000442673.1/ENSG00000236423.1, exon 2 of 2)	ENSG00000236423.1	14320	chr1	3598638	3599075	Promoter	ENSG00000078900.10	0
chr1	3834782	3835256	Distal Intergenic	ENSG00000236423.1	17802	chr1	3599491	3599904	Promoter	ENSG00000078900.10	561
chr1	3840029	3840326	Distal Intergenic	ENSG00000236423.1	23049	chr1	3600284	3601924	Intron (ENST00000378295.4/ENSG00000078900.10, intron 3 of 13)	ENSG00000078900.10	1354
chr1	3841582	3842350	Distal Intergenic	ENSG00000236423.1	24602	chr1	3602768	3603214	Intron (ENST00000378295.4/ENSG00000078900.10, intron 3 of 13)	ENSG00000078900.10	3838
chr1	3999646	4000122	Promoter	ENSG00000233304.1	-551	chr1	3603411	3604432	Intron (ENST00000378295.4/ENSG00000078900.10, intron 3 of 13)	ENSG00000078900.10	-2804
chr1	4001227	4001864	Promoter	ENSG00000233304.1	550	chr1	3604689	3606653	Promoter	ENSG00000078900.10	-583
chr1	4002684	4002994	Intron (ENST00000456897.1/ENSG00000233304.1, intron 2 of 2)	ENSG00000233304.1	2007	chr1	3606881	3607111	Promoter	ENSG00000078900.10	-125
chr1	4003161	4004797	Intron (ENST00000456897.1/ENSG00000233304.1, intron 2 of 2)	ENSG00000233304.1	2484	chr1	3607301	3607975	Promoter	ENSG00000078900.10	30
chr1	4004948	4006185	Intron (ENST00000456897.1/ENSG00000233304.1, intron 2 of 2)	ENSG00000226374.1	2855	chr1	3608596	3609468	Intron (ENST00000378295.4/ENSG00000078900.10, intron 3 of 13)	ENSG00000078900.10	1325
chr1	4008061	4008562	Promoter	ENSG00000226374.1	478	chr1	3609737	3610040	Intron (ENST00000378295.4/ENSG00000078900.10, intron 3 of 13)	ENSG00000078900.10	2466
chr1	4008892	4009382	Promoter	ENSG00000226374.1	0	chr1	3612440	3612889	Intron (ENST00000378295.4/ENSG00000078900.10, intron 3 of 13)	ENSG00000078900.10	-1721
chr1	4013617	4013980	Exon (ENST00000412674.1/ENSG00000233304.1, exon 3 of 3)	ENSG00000226374.1	-4577	chr1	3613328	3613988	Promoter	ENSG00000078900.10	-622
chr1	4015402	4016074	Downstream (<=300bp)	ENSG00000226374.1	-6362	chr1	3614208	3614636	Promoter	ENSG00000078900.10	0
chr1	4016373	4016629	Distal Intergenic	ENSG00000226374.1	-7333	chr1	3615216	3616232	Promoter	ENSG00000078900.10	594
chr1	4017420	4018321	Distal Intergenic	ENSG00000226374.1	-8380	chr1	3617785	3618035	Intron (ENST00000378295.4/ENSG00000078900.10, intron 3 of 13)	ENSG00000078900.10	3163
chr1	4023590	4023866	Distal Intergenic	ENSG00000226374.1	-14550	chr1	3618592	3619931	Intron (ENST00000378295.4/ENSG00000078900.10, intron 3 of 13)	ENSG00000078900.10	3970
chr1	4026119	4026657	Distal Intergenic	ENSG00000226374.1	-17079	chr1	3620934	3621414	Intron (ENST00000378295.4/ENSG00000078900.10, intron 3 of 13)	ENSG00000078900.10	6312
chr1	4029029	4029283	Distal Intergenic	ENSG00000226374.1	-19989	chr1	3621663	3622468	Intron (ENST00000378295.4/ENSG00000078900.10, intron 3 of 13)	ENSG00000078900.10	7041
chr1	4031299	4031771	Distal Intergenic	ENSG00000226374.1	-22259	chr1	3623273	3623488	Intron (ENST00000378295.4/ENSG00000078900.10, intron 3 of 13)	ENSG00000235131.1	7374
chr1	4032979	4033464	Distal Intergenic	ENSG00000226374.1	-23939	chr1	3624216	3624431	Exon (ENST00000378295.4/ENSG00000078900.10, exon 4 of 14)	ENSG00000235131.1	6431
chr1	4034703	4035136	Distal Intergenic	ENSG00000226374.1	-25663	chr1	3624844	3625201	Exon (ENST00000604194.1/ENSG00000078900.10, exon 2 of 2)	ENSG00000235131.1	5661
chr1	4035289	4035529	Distal Intergenic	ENSG00000226374.1	-26249	chr1	3626345	3627352	Intron (ENST00000378295.4/ENSG00000078900.10, intron 4 of 13)	ENSG00000235131.1	3510
chr1	4035961	4036711	Distal Intergenic	ENSG00000226374.1	-26921	chr1	3627505	3627805	Intron (ENST00000378295.4/ENSG00000078900.10, intron 4 of 13)	ENSG00000235131.1	3057
chr1	4037718	4038589	Distal Intergenic	ENSG00000226374.1	-28678	chr1	3628941	3629156	Exon (ENST00000416554.1/ENSG00000235131.1, exon 2 of 2)	ENSG00000235131.1	1706
chr1	4039223	4039994	Distal Intergenic	ENSG00000226374.1	-30183	chr1	3629881	3630137	Promoter	ENSG00000235131.1	725
chr1	4040219	4040459	Distal Intergenic	ENSG00000226374.1	-31179	chr1	3630765	3632887	Promoter	ENSG00000235131.1	0
chr1	4042332	4042650	Distal Intergenic	ENSG00000226374.1	-33292	chr1	3633065	3633408	Intron (ENST00000378295.4/ENSG00000078900.10, intron 4 of 13)	ENSG00000235131.1	-2203
chr1	4046696	4046941	Distal Intergenic	ENSG00000226374.1	-37656	chr1	3633678	3633893	Intron (ENST00000378295.4/ENSG00000078900.10, intron 4 of 13)	ENSG00000235131.1	-2816
chr1	4048089	4048540	Distal Intergenic	ENSG00000226374.1	-39049	chr1	3634260	3634767	Intron (ENST00000378295.4/ENSG00000078900.10, intron 4 of 13)	ENSG00000235131.1	-3398
chr1	4049496	4049851	Distal Intergenic	ENSG00000226374.1	-40456	chr1	3635200	3635825	Intron (ENST00000378295.4/ENSG00000078900.10, intron 4 of 13)	ENSG00000235131.1	-4338
chr1	4054111	4054351	Distal Intergenic	ENSG00000226374.1	-45071	chr1	3636203	3636448	Intron (ENST00000378295.4/ENSG00000078900.10, intron 4 of 13)	ENSG00000235131.1	-5341
chr1	4056422	4056662	Distal Intergenic	ENSG00000226374.1	-47382	chr1	3637021	3637452	Intron (ENST00000378295.4/ENSG00000078900.10, intron 4 of 13)	ENSG00000235131.1	-6159
chr1	4058155	4058657	Distal Intergenic	ENSG00000226374.1	-49115	chr1	3638278	3639672	Exon (ENST00000378295.4/ENSG00000078900.10, exon 5 of 14)	ENSG00000078900.10	-4370
chr1	4059023	4059263	Distal Intergenic	ENSG00000226374.1	-49983	chr1	3643685	3643994	Promoter	ENSG00000078900.10	-48
chr1	4059656	4059896	Distal Intergenic	ENSG00000226374.1	-50616	chr1	3644506	3645321	Promoter	ENSG00000078900.10	464
chr1	4061097	4061402	Distal Intergenic	ENSG00000226374.1	-52057	chr1	3645574	3645949	Exon (ENST00000378295.4/ENSG00000078900.10, exon 10 of 14)	ENSG00000078900.10	1532
chr1	4061666	4062144	Distal Intergenic	ENSG00000226374.1	-52626	chr1	3647178	3647396	Intron (ENST00000378295.4/ENSG00000078900.10, intron 11 of 13)	ENSG00000078900.10	3136
chr1	4062422	4062920	Distal Intergenic	ENSG00000226374.1	-53382	chr1	3648024	3648331	3' UTR	ENSG00000078900.10	3982
chr1	4064197	4064483	Distal Intergenic	ENSG00000226374.1	-55157	chr1	3649289	3649546	3' UTR	ENSG00000227372.6	4893
chr1	4064826	4065247	Distal Intergenic	ENSG00000226374.1	-55786	chr1	3650890	3651321	3' UTR	ENSG00000227372.6	3118
chr1	4065559	4066405	Distal Intergenic	ENSG00000226374.1	-56519	chr1	3661606	3662492	Promoter	ENSG00000227372.6	310
chr1	4067044	4067284	Distal Intergenic	ENSG00000226374.1	-58004	chr1	3673049	3673321	Exon (ENST00000294600.2/ENSG00000162592.4, exon 4 of 12)	ENSG00000162592.4	4040
chr1	4070084	4071312	Distal Intergenic	ENSG00000226374.1	-61044	chr1	3673901	3674163	Intron (ENST00000294600.2/ENSG00000162592.4, intron 4 of 11)	ENSG00000162592.4	4892
chr1	4077843	4078109	Distal Intergenic	ENSG00000226374.1	-68803	chr1	3675075	3675290	Intron (ENST00000294600.2/ENSG00000162592.4, intron 4 of 11)	ENSG00000162592.4	6066
chr1	4079842	4080865	Distal Intergenic	ENSG00000226374.1	-70802	chr1	3678707	3679014	Intron (ENST00000294600.2/ENSG00000162592.4, intron 5 of 11)	ENSG00000162592.4	9698
chr1	4081023	4081829	Distal Intergenic	ENSG00000226374.1	-71983	chr1	3680036	3680414	3' UTR	ENSG00000235169.3	-8938
chr1	4082167	4082522	Distal Intergenic	ENSG00000226374.1	-73127	chr1	3682105	3682359	Intron (ENST00000294600.2/ENSG00000162592.4, intron 8 of 11)	ENSG00000235169.3	-6993
chr1	4106175	4106415	Distal Intergenic	ENSG00000226374.1	-97135	chr1	3683535	3683750	Intron (ENST00000294600.2/ENSG00000162592.4, intron 9 of 11)	ENSG00000235169.3	-5602
chr1	4108251	4109063	Distal Intergenic	ENSG00000226374.1	-99211	chr1	3686177	3686392	3' UTR	ENSG00000235169.3	-2960
chr1	4109816	4110279	Distal Intergenic	ENSG00000226374.1	-100776	chr1	3690674	3690943	Intron (ENST00000444870.2/ENSG00000235169.3, intron 2 of 3)	ENSG00000235169.3	1047
chr1	4110803	4111360	Distal Intergenic	ENSG00000226374.1	-101763	chr1	3692924	3693343	Distal Intergenic	ENSG00000235169.3	3297
chr1	4113728	4114081	Distal Intergenic	ENSG00000226374.1	-104688	chr1	3694050	3694470	Distal Intergenic	ENSG00000235169.3	4423
chr1	4114319	4115714	Distal Intergenic	ENSG00000226374.1	-105279	chr1	3694878	3696035	Distal Intergenic	ENSG00000266075.1	-3344
chr1	4115892	4116753	Distal Intergenic	ENSG00000226374.1	-106852	chr1	3703493	3704636	Exon (ENST00000378251.1/ENSG00000130764.5, exon 2 of 7)	ENSG00000272153.1	1921
chr1	4117036	4117583	Distal Intergenic	ENSG00000226374.1	-107996	chr1	3706649	3707420	Intron (ENST00000378251.1/ENSG00000130764.5, intron 1 of 6)	ENSG00000272153.1	5077
chr1	4118267	4118513	Distal Intergenic	ENSG00000226374.1	-109227	chr1	3707662	3708275	Intron (ENST00000378251.1/ENSG00000130764.5, intron 1 of 6)	ENSG00000130764.5	4793
chr1	4118832	4119685	Distal Intergenic	ENSG00000226374.1	-109792	chr1	3716487	3716775	Distal Intergenic	ENSG00000130764.5	-3419
chr1	4121053	4122359	Distal Intergenic	ENSG00000226374.1	-112013	chr1	3720313	3720548	Distal Intergenic	ENSG00000130764.5	-7245
chr1	4122578	4122959	Distal Intergenic	ENSG00000229280.1	113000	chr1	3726668	3727079	Distal Intergenic	ENSG00000116198.8	5943
chr1	4123181	4123742	Distal Intergenic	ENSG00000229280.1	112217	chr1	3731406	3731852	3' UTR	ENSG00000116198.8	1170
chr1	4128560	4128928	Distal Intergenic	ENSG00000229280.1	107031	chr1	3740395	3740689	Intron (ENST00000378230.3/ENSG00000116198.8, intron 18 of 21)	ENSG00000116198.8	5181
chr1	4134999	4135239	Distal Intergenic	ENSG00000229280.1	100720	chr1	3740973	3741284	Intron (ENST00000378230.3/ENSG00000116198.8, intron 18 of 21)	ENSG00000116198.8	4586
chr1	4136020	4136260	Distal Intergenic	ENSG00000229280.1	99699	chr1	3755389	3755620	Promoter	ENSG00000116198.8	54
chr1	4136472	4136923	Distal Intergenic	ENSG00000229280.1	99036	chr1	3756651	3757102	Promoter	ENSG00000116198.8	-977
chr1	4138631	4138960	Distal Intergenic	ENSG00000229280.1	96999	chr1	3785306	3785604	Intron (ENST00000338895.3/ENSG00000169598.11, intron 4 of 6)	ENSG00000169598.11	1079
chr1	4139263	4139861	Distal Intergenic	ENSG00000229280.1	96098	chr1	3785896	3786236	3' UTR	ENSG00000169598.11	1669
chr1	4141779	4142453	Distal Intergenic	ENSG00000229280.1	93506	chr1	3786600	3786851	Intron (ENST00000338895.3/ENSG00000169598.11, intron 5 of 6)	ENSG00000169598.11	2373
chr1	4143668	4144168	Distal Intergenic	ENSG00000229280.1	91791	chr1	3787295	3787512	Intron (ENST00000338895.3/ENSG00000169598.11, intron 5 of 6)	ENSG00000169598.11	3068
chr1	4144716	4145155	Distal Intergenic	ENSG00000229280.1	90804	chr1	3792423	3792685	Intron (ENST00000378209.3/ENSG00000169598.11, intron 6 of 6)	ENSG00000169598.11	-7386
chr1	4146309	4147093	Distal Intergenic	ENSG00000229280.1	88866	chr1	3796947	3797200	Intron (ENST00000378209.3/ENSG00000169598.11, intron 6 of 6)	ENSG00000169598.11	-2871
chr1	4148050	4148404	Distal Intergenic	ENSG00000229280.1	87555	chr1	3803400	3803697	Distal Intergenic	ENSG00000264428.1	2772
chr1	4148835	4149429	Distal Intergenic	ENSG00000229280.1	86530	chr1	3806870	3807095	Intron (ENST00000486765.1/ENSG00000198912.6, intron 4 of 4)	ENSG00000264428.1	6242
chr1	4149847	4150787	Distal Intergenic	ENSG00000229280.1	85172	chr1	3820458	3821656	Exon (ENST00000413332.1/ENSG00000236423.1, exon 2 of 3)	ENSG00000236423.1	3478
chr1	4155793	4156122	Distal Intergenic	ENSG00000229280.1	79837	chr1	3823585	3824269	Intron (ENST00000442673.1/ENSG00000236423.1, intron 1 of 1)	ENSG00000236423.1	6605
chr1	4162509	4162749	Distal Intergenic	ENSG00000229280.1	73210	chr1	3825643	3826055	Intron (ENST00000442673.1/ENSG00000236423.1, intron 1 of 1)	ENSG00000236423.1	8663
chr1	4165159	4165448	Distal Intergenic	ENSG00000229280.1	70511	chr1	3826720	3827065	Intron (ENST00000442673.1/ENSG00000236423.1, intron 1 of 1)	ENSG00000236423.1	9740
chr1	4167813	4168178	Distal Intergenic	ENSG00000229280.1	67781	chr1	3827684	3827949	Intron (ENST00000442673.1/ENSG00000236423.1, intron 1 of 1)	ENSG00000236423.1	10704
chr1	4168604	4169107	Distal Intergenic	ENSG00000229280.1	66852	chr1	3828452	3828667	Intron (ENST00000442673.1/ENSG00000236423.1, intron 1 of 1)	ENSG00000236423.1	11472
chr1	4171063	4171582	Distal Intergenic	ENSG00000229280.1	64377	chr1	3829633	3830228	Intron (ENST00000442673.1/ENSG00000236423.1, intron 1 of 1)	ENSG00000236423.1	12653
chr1	4172286	4172668	Distal Intergenic	ENSG00000229280.1	63291	chr1	3830397	3830612	Exon (ENST00000439488.1/ENSG00000236423.1, exon 3 of 4)	ENSG00000236423.1	13417
chr1	4173834	4174074	Distal Intergenic	ENSG00000229280.1	61885	chr1	3831229	3831544	Exon (ENST00000442673.1/ENSG00000236423.1, exon 2 of 2)	ENSG00000236423.1	14249
chr1	4177175	4177585	Distal Intergenic	ENSG00000229280.1	58374	chr1	3832778	3833351	Exon (ENST00000442673.1/ENSG00000236423.1, exon 2 of 2)	ENSG00000236423.1	15798
chr1	4178693	4179684	Distal Intergenic	ENSG00000229280.1	56275	chr1	3834126	3834341	Distal Intergenic	ENSG00000236423.1	17146
chr1	4181737	4182336	Distal Intergenic	ENSG00000229280.1	53623	chr1	3834529	3834976	Distal Intergenic	ENSG00000236423.1	17549
chr1	4185044	4185284	Distal Intergenic	ENSG00000229280.1	50675	chr1	3835132	3835484	Distal Intergenic	ENSG00000236423.1	18152
chr1	4186786	4187155	Distal Intergenic	ENSG00000229280.1	48804	chr1	3835910	3836588	Distal Intergenic	ENSG00000236423.1	18930
chr1	4187442	4187913	Distal Intergenic	ENSG00000229280.1	48046	chr1	3841343	3841638	Distal Intergenic	ENSG00000236423.1	24363
chr1	4188503	4188876	Distal Intergenic	ENSG00000229280.1	47083	chr1	3841820	3842743	Distal Intergenic	ENSG00000236423.1	24840
chr1	4189176	4189626	Distal Intergenic	ENSG00000229280.1	46333	chr1	3999600	3999835	Promoter	ENSG00000233304.1	-838
chr1	4192281	4192568	Distal Intergenic	ENSG00000229280.1	43391	chr1	4000232	4000991	Promoter	ENSG00000233304.1	0
chr1	4193105	4193485	Distal Intergenic	ENSG00000229280.1	42474	chr1	4004778	4005013	Intron (ENST00000456897.1/ENSG00000233304.1, intron 2 of 2)	ENSG00000226374.1	4027
chr1	4193988	4194314	Distal Intergenic	ENSG00000229280.1	41645	chr1	4005230	4005475	Intron (ENST00000456897.1/ENSG00000233304.1, intron 2 of 2)	ENSG00000226374.1	3565
chr1	4198195	4198620	Distal Intergenic	ENSG00000229280.1	37339	chr1	4008156	4008698	Promoter	ENSG00000226374.1	342
chr1	4198932	4199381	Distal Intergenic	ENSG00000229280.1	36578	chr1	4013493	4013708	Exon (ENST00000412674.1/ENSG00000233304.1, exon 3 of 3)	ENSG00000226374.1	-4453
chr1	4199737	4200696	Distal Intergenic	ENSG00000229280.1	35263	chr1	4013983	4014773	Exon (ENST00000412674.1/ENSG00000233304.1, exon 3 of 3)	ENSG00000226374.1	-4943
chr1	4200873	4201406	Distal Intergenic	ENSG00000229280.1	34553	chr1	4016294	4016651	Distal Intergenic	ENSG00000226374.1	-7254
chr1	4201652	4202132	Distal Intergenic	ENSG00000229280.1	33827	chr1	4021531	4021746	Distal Intergenic	ENSG00000226374.1	-12491
chr1	4205587	4205827	Distal Intergenic	ENSG00000229280.1	30132	chr1	4026413	4026674	Distal Intergenic	ENSG00000226374.1	-17373
chr1	4206344	4206673	Distal Intergenic	ENSG00000229280.1	29286	chr1	4028786	4029045	Distal Intergenic	ENSG00000226374.1	-19746
chr1	4211998	4212583	Distal Intergenic	ENSG00000229280.1	23376	chr1	4029302	4029714	Distal Intergenic	ENSG00000226374.1	-20262
chr1	4213078	4213364	Distal Intergenic	ENSG00000229280.1	22595	chr1	4030695	4031205	Distal Intergenic	ENSG00000226374.1	-21655
chr1	4216205	4217324	Distal Intergenic	ENSG00000229280.1	18635	chr1	4031673	4031935	Distal Intergenic	ENSG00000226374.1	-22633
chr1	4218119	4218893	Distal Intergenic	ENSG00000229280.1	17066	chr1	4034924	4035562	Distal Intergenic	ENSG00000226374.1	-25884
chr1	4219229	4219793	Distal Intergenic	ENSG00000229280.1	16166	chr1	4035708	4036047	Distal Intergenic	ENSG00000226374.1	-26668
chr1	4221762	4222307	Distal Intergenic	ENSG00000229280.1	13652	chr1	4036317	4036643	Distal Intergenic	ENSG00000226374.1	-27277
chr1	4224100	4224842	Distal Intergenic	ENSG00000229280.1	11117	chr1	4036847	4037384	Distal Intergenic	ENSG00000226374.1	-27807
chr1	4225810	4226106	Distal Intergenic	ENSG00000229280.1	9853	chr1	4037571	4037835	Distal Intergenic	ENSG00000226374.1	-28531
chr1	4226597	4226987	Distal Intergenic	ENSG00000229280.1	8972	chr1	4038341	4038865	Distal Intergenic	ENSG00000226374.1	-29301
chr1	4228959	4230061	Distal Intergenic	ENSG00000229280.1	5898	chr1	4039135	4039399	Distal Intergenic	ENSG00000226374.1	-30095
chr1	4231289	4231785	Distal Intergenic	ENSG00000229280.1	4174	chr1	4039727	4039942	Distal Intergenic	ENSG00000226374.1	-30687
chr1	4232819	4233700	Distal Intergenic	ENSG00000229280.1	2259	chr1	4040608	4041415	Distal Intergenic	ENSG00000226374.1	-31568
chr1	4235806	4236339	Promoter	ENSG00000229280.1	0	chr1	4042085	4042750	Distal Intergenic	ENSG00000226374.1	-33045
chr1	4237898	4238196	Distal Intergenic	ENSG00000229280.1	-1939	chr1	4046662	4046903	Distal Intergenic	ENSG00000226374.1	-37622
chr1	4239755	4240361	Distal Intergenic	ENSG00000229280.1	-3796	chr1	4048245	4048460	Distal Intergenic	ENSG00000226374.1	-39205
chr1	4244325	4244819	Distal Intergenic	ENSG00000229280.1	-8366	chr1	4055278	4055734	Distal Intergenic	ENSG00000226374.1	-46238
chr1	4245936	4246176	Distal Intergenic	ENSG00000229280.1	-9977	chr1	4056111	4056724	Distal Intergenic	ENSG00000226374.1	-47071
chr1	4262821	4263668	Distal Intergenic	ENSG00000229280.1	-26862	chr1	4056984	4057508	Distal Intergenic	ENSG00000226374.1	-47944
chr1	4266536	4266853	Distal Intergenic	ENSG00000229280.1	-30577	chr1	4060297	4060680	Distal Intergenic	ENSG00000226374.1	-51257
chr1	4267206	4267778	Distal Intergenic	ENSG00000229280.1	-31247	chr1	4061245	4061782	Distal Intergenic	ENSG00000226374.1	-52205
chr1	4268013	4268798	Distal Intergenic	ENSG00000229280.1	-32054	chr1	4062077	4062295	Distal Intergenic	ENSG00000226374.1	-53037
chr1	4272852	4273203	Distal Intergenic	ENSG00000229280.1	-36893	chr1	4063032	4063384	Distal Intergenic	ENSG00000226374.1	-53992
chr1	4273560	4273975	Distal Intergenic	ENSG00000229280.1	-37601	chr1	4064151	4064420	Distal Intergenic	ENSG00000226374.1	-55111
chr1	4274584	4274872	Distal Intergenic	ENSG00000229280.1	-38625	chr1	4064750	4065219	Distal Intergenic	ENSG00000226374.1	-55710
chr1	4275086	4275605	Distal Intergenic	ENSG00000229280.1	-39127	chr1	4065695	4066097	Distal Intergenic	ENSG00000226374.1	-56655
chr1	4275800	4276379	Distal Intergenic	ENSG00000229280.1	-39841	chr1	4070499	4070714	Distal Intergenic	ENSG00000226374.1	-61459
chr1	4277282	4277881	Distal Intergenic	ENSG00000229280.1	-41323	chr1	4078212	4079397	Distal Intergenic	ENSG00000226374.1	-69172
chr1	4278757	4279467	Distal Intergenic	ENSG00000229280.1	-42798	chr1	4080583	4081096	Distal Intergenic	ENSG00000226374.1	-71543
chr1	4279783	4280258	Distal Intergenic	ENSG00000229280.1	-43824	chr1	4081316	4082363	Distal Intergenic	ENSG00000226374.1	-72276
chr1	4280960	4281204	Distal Intergenic	ENSG00000229280.1	-45001	chr1	4092815	4093205	Distal Intergenic	ENSG00000226374.1	-83775
chr1	4289836	4290429	Distal Intergenic	ENSG00000229280.1	-53877	chr1	4106760	4107043	Distal Intergenic	ENSG00000226374.1	-97720
chr1	4315782	4316602	Distal Intergenic	ENSG00000229280.1	-79823	chr1	4107200	4107570	Distal Intergenic	ENSG00000226374.1	-98160
chr1	4322809	4323049	Distal Intergenic	ENSG00000229280.1	-86850	chr1	4108410	4108927	Distal Intergenic	ENSG00000226374.1	-99370
chr1	4331110	4331656	Distal Intergenic	ENSG00000229280.1	-95151	chr1	4109096	4109314	Distal Intergenic	ENSG00000226374.1	-100056
chr1	4331965	4332673	Distal Intergenic	ENSG00000229280.1	-96006	chr1	4110044	4110510	Distal Intergenic	ENSG00000226374.1	-101004
chr1	4335629	4335964	Distal Intergenic	ENSG00000229280.1	-99670	chr1	4110991	4111349	Distal Intergenic	ENSG00000226374.1	-101951
chr1	4340371	4340721	Distal Intergenic	ENSG00000229280.1	-104412	chr1	4112856	4113433	Distal Intergenic	ENSG00000226374.1	-103816
chr1	4341928	4342204	Distal Intergenic	ENSG00000229280.1	-105969	chr1	4114025	4114567	Distal Intergenic	ENSG00000226374.1	-104985
chr1	4343973	4344268	Distal Intergenic	ENSG00000229280.1	-108014	chr1	4115226	4115459	Distal Intergenic	ENSG00000226374.1	-106186
chr1	4357869	4358137	Distal Intergenic	ENSG00000235054.1	-113974	chr1	4115768	4116279	Distal Intergenic	ENSG00000226374.1	-106728
chr1	4359316	4359668	Distal Intergenic	ENSG00000235054.1	-112443	chr1	4116846	4117169	Distal Intergenic	ENSG00000226374.1	-107806
chr1	4360067	4360318	Distal Intergenic	ENSG00000235054.1	-111793	chr1	4117315	4117934	Distal Intergenic	ENSG00000226374.1	-108275
chr1	4360720	4361072	Distal Intergenic	ENSG00000235054.1	-111039	chr1	4118712	4119182	Distal Intergenic	ENSG00000226374.1	-109672
chr1	4362440	4362887	Distal Intergenic	ENSG00000235054.1	-109224	chr1	4119357	4119758	Distal Intergenic	ENSG00000226374.1	-110317
chr1	4364238	4364526	Distal Intergenic	ENSG00000235054.1	-107585	chr1	4120381	4121196	Distal Intergenic	ENSG00000226374.1	-111341
chr1	4366426	4366666	Distal Intergenic	ENSG00000235054.1	-105445	chr1	4121414	4122863	Distal Intergenic	ENSG00000226374.1	-112374
chr1	4367536	4367904	Distal Intergenic	ENSG00000235054.1	-104207	chr1	4123557	4123894	Distal Intergenic	ENSG00000229280.1	112065
chr1	4368504	4368744	Distal Intergenic	ENSG00000235054.1	-103367	chr1	4132466	4132757	Distal Intergenic	ENSG00000229280.1	103202
chr1	4369600	4370107	Distal Intergenic	ENSG00000235054.1	-102004	chr1	4133267	4133567	Distal Intergenic	ENSG00000229280.1	102392
chr1	4373795	4374252	Distal Intergenic	ENSG00000235054.1	-97859	chr1	4136100	4136327	Distal Intergenic	ENSG00000229280.1	99632
chr1	4375608	4375848	Distal Intergenic	ENSG00000235054.1	-96263	chr1	4139809	4140548	Distal Intergenic	ENSG00000229280.1	95411
chr1	4376136	4376694	Distal Intergenic	ENSG00000235054.1	-95417	chr1	4141797	4142249	Distal Intergenic	ENSG00000229280.1	93710
chr1	4378751	4379275	Distal Intergenic	ENSG00000235054.1	-92836	chr1	4143225	4143676	Distal Intergenic	ENSG00000229280.1	92283
chr1	4380047	4380399	Distal Intergenic	ENSG00000235054.1	-91712	chr1	4143849	4144678	Distal Intergenic	ENSG00000229280.1	91281
chr1	4380648	4380893	Distal Intergenic	ENSG00000235054.1	-91218	chr1	4145090	4145688	Distal Intergenic	ENSG00000229280.1	90271
chr1	4382742	4383114	Distal Intergenic	ENSG00000235054.1	-88997	chr1	4146290	4146719	Distal Intergenic	ENSG00000229280.1	89240
chr1	4384202	4384770	Distal Intergenic	ENSG00000235054.1	-87341	chr1	4147655	4148329	Distal Intergenic	ENSG00000229280.1	87630
chr1	4385570	4385810	Distal Intergenic	ENSG00000235054.1	-86301	chr1	4148568	4148930	Distal Intergenic	ENSG00000229280.1	87029
chr1	4386330	4387113	Distal Intergenic	ENSG00000235054.1	-84998	chr1	4149107	4149659	Distal Intergenic	ENSG00000229280.1	86300
chr1	4388363	4389060	Distal Intergenic	ENSG00000235054.1	-83051	chr1	4149947	4150287	Distal Intergenic	ENSG00000229280.1	85672
chr1	4390726	4391077	Distal Intergenic	ENSG00000235054.1	-81034	chr1	4151143	4151617	Distal Intergenic	ENSG00000229280.1	84342
chr1	4393367	4393707	Distal Intergenic	ENSG00000235054.1	-78404	chr1	4155886	4156110	Distal Intergenic	ENSG00000229280.1	79849
chr1	4393957	4394366	Distal Intergenic	ENSG00000235054.1	-77745	chr1	4166575	4166994	Distal Intergenic	ENSG00000229280.1	68965
chr1	4394569	4395093	Distal Intergenic	ENSG00000235054.1	-77018	chr1	4167225	4168036	Distal Intergenic	ENSG00000229280.1	67923
chr1	4396021	4396261	Distal Intergenic	ENSG00000235054.1	-75850	chr1	4168427	4168742	Distal Intergenic	ENSG00000229280.1	67217
chr1	4397256	4397496	Distal Intergenic	ENSG00000235054.1	-74615	chr1	4169423	4169972	Distal Intergenic	ENSG00000229280.1	65987
chr1	4400282	4400594	Distal Intergenic	ENSG00000235054.1	-71517	chr1	4170970	4171233	Distal Intergenic	ENSG00000229280.1	64726
chr1	4400940	4401238	Distal Intergenic	ENSG00000235054.1	-70873	chr1	4171575	4171907	Distal Intergenic	ENSG00000229280.1	64052
chr1	4401579	4402035	Distal Intergenic	ENSG00000235054.1	-70076	chr1	4175357	4175572	Distal Intergenic	ENSG00000229280.1	60387
chr1	4404012	4404397	Distal Intergenic	ENSG00000235054.1	-67714	chr1	4176010	4176517	Distal Intergenic	ENSG00000229280.1	59442
chr1	4407435	4407675	Distal Intergenic	ENSG00000235054.1	-64436	chr1	4177096	4177630	Distal Intergenic	ENSG00000229280.1	58329
chr1	4410619	4410875	Distal Intergenic	ENSG00000235054.1	-61236	chr1	4178653	4179366	Distal Intergenic	ENSG00000229280.1	56593
chr1	4411624	4412110	Distal Intergenic	ENSG00000235054.1	-60001	chr1	4179774	4180068	Distal Intergenic	ENSG00000229280.1	55891
chr1	4413200	4414100	Distal Intergenic	ENSG00000235054.1	-58011	chr1	4180932	4181147	Distal Intergenic	ENSG00000229280.1	54812
chr1	4415375	4415661	Distal Intergenic	ENSG00000235054.1	-56450	chr1	4181419	4182002	Distal Intergenic	ENSG00000229280.1	53957
chr1	4419164	4419404	Distal Intergenic	ENSG00000235054.1	-52707	chr1	4186800	4187196	Distal Intergenic	ENSG00000229280.1	48763
chr1	4419637	4419880	Distal Intergenic	ENSG00000235054.1	-52231	chr1	4188308	4189795	Distal Intergenic	ENSG00000229280.1	46164
chr1	4421144	4421800	Distal Intergenic	ENSG00000235054.1	-50311	chr1	4192881	4193470	Distal Intergenic	ENSG00000229280.1	42489
chr1	4425459	4426053	Distal Intergenic	ENSG00000235054.1	-46058	chr1	4194509	4194947	Distal Intergenic	ENSG00000229280.1	41012
chr1	4427705	4428114	Distal Intergenic	ENSG00000235054.1	-43997	chr1	4195739	4196102	Distal Intergenic	ENSG00000229280.1	39857
chr1	4432256	4432579	Distal Intergenic	ENSG00000235054.1	-39532	chr1	4197877	4198153	Distal Intergenic	ENSG00000229280.1	37806
chr1	4434665	4435024	Distal Intergenic	ENSG00000235054.1	-37087	chr1	4198365	4199113	Distal Intergenic	ENSG00000229280.1	36846
chr1	4436773	4437269	Distal Intergenic	ENSG00000235054.1	-34842	chr1	4199758	4200552	Distal Intergenic	ENSG00000229280.1	35407
chr1	4441013	4441253	Distal Intergenic	ENSG00000235054.1	-30858	chr1	4200767	4201815	Distal Intergenic	ENSG00000229280.1	34144
chr1	4442987	4443339	Distal Intergenic	ENSG00000235054.1	-28772	chr1	4202263	4202552	Distal Intergenic	ENSG00000229280.1	33407
chr1	4444223	4444463	Distal Intergenic	ENSG00000235054.1	-27648	chr1	4207573	4207854	Distal Intergenic	ENSG00000229280.1	28105
chr1	4444801	4445041	Distal Intergenic	ENSG00000235054.1	-27070	chr1	4208748	4209046	Distal Intergenic	ENSG00000229280.1	26913
chr1	4446686	4447141	Distal Intergenic	ENSG00000235054.1	-24970	chr1	4210848	4211149	Distal Intergenic	ENSG00000229280.1	24810
chr1	4448253	4448641	Distal Intergenic	ENSG00000235054.1	-23470	chr1	4212652	4214156	Distal Intergenic	ENSG00000229280.1	21803
chr1	4449811	4450513	Distal Intergenic	ENSG00000235054.1	-21598	chr1	4216295	4216547	Distal Intergenic	ENSG00000229280.1	19412
chr1	4451019	4451275	Distal Intergenic	ENSG00000235054.1	-20836	chr1	4216712	4217527	Distal Intergenic	ENSG00000229280.1	18432
chr1	4455763	4456212	Distal Intergenic	ENSG00000235054.1	-15899	chr1	4218281	4219502	Distal Intergenic	ENSG00000229280.1	16457
chr1	4457464	4457791	Distal Intergenic	ENSG00000235054.1	-14320	chr1	4220474	4220845	Distal Intergenic	ENSG00000229280.1	15114
chr1	4460365	4460794	Distal Intergenic	ENSG00000235054.1	-11317	chr1	4221230	4221447	Distal Intergenic	ENSG00000229280.1	14512
chr1	4460962	4461202	Distal Intergenic	ENSG00000235054.1	-10909	chr1	4221963	4222577	Distal Intergenic	ENSG00000229280.1	13382
chr1	4466889	4467243	Distal Intergenic	ENSG00000235054.1	-4868	chr1	4223323	4224014	Distal Intergenic	ENSG00000229280.1	11945
chr1	4468405	4468645	Distal Intergenic	ENSG00000235054.1	-3466	chr1	4226297	4226838	Distal Intergenic	ENSG00000229280.1	9121
chr1	4477534	4477774	Intron (ENST00000423197.1/ENSG00000235054.1, intron 3 of 5)	ENSG00000235054.1	5423	chr1	4227342	4227837	Distal Intergenic	ENSG00000229280.1	8122
chr1	4479865	4480105	Intron (ENST00000423197.1/ENSG00000235054.1, intron 3 of 5)	ENSG00000235054.1	7754	chr1	4230601	4230816	Distal Intergenic	ENSG00000229280.1	5143
chr1	4482018	4482326	Intron (ENST00000423197.1/ENSG00000235054.1, intron 3 of 5)	ENSG00000235054.1	9907	chr1	4231301	4231758	Distal Intergenic	ENSG00000229280.1	4201
chr1	4484192	4484483	Exon (ENST00000423197.1/ENSG00000235054.1, exon 6 of 6)	ENSG00000235054.1	12081	chr1	4233252	4233495	Distal Intergenic	ENSG00000229280.1	2464
chr1	4485618	4485858	Distal Intergenic	ENSG00000235054.1	13507	chr1	4234954	4235516	Promoter	ENSG00000229280.1	443
chr1	4495051	4495416	Distal Intergenic	ENSG00000235054.1	22940	chr1	4238585	4239109	Distal Intergenic	ENSG00000229280.1	-2626
chr1	4496959	4497273	Distal Intergenic	ENSG00000235054.1	24848	chr1	4240221	4240438	Distal Intergenic	ENSG00000229280.1	-4262
chr1	4497585	4497930	Distal Intergenic	ENSG00000235054.1	25474	chr1	4262366	4262611	Distal Intergenic	ENSG00000229280.1	-26407
chr1	4498691	4499159	Distal Intergenic	ENSG00000235054.1	26580	chr1	4269614	4270040	Distal Intergenic	ENSG00000229280.1	-33655
chr1	4510796	4511115	Distal Intergenic	ENSG00000235054.1	38685	chr1	4271977	4272510	Distal Intergenic	ENSG00000229280.1	-36018
chr1	4513923	4514429	Distal Intergenic	ENSG00000235054.1	41812	chr1	4274833	4276031	Distal Intergenic	ENSG00000229280.1	-38874
chr1	4514600	4514946	Distal Intergenic	ENSG00000235054.1	42489	chr1	4277805	4279325	Distal Intergenic	ENSG00000229280.1	-41846
chr1	4515433	4515749	Distal Intergenic	ENSG00000235054.1	43322	chr1	4289914	4290501	Distal Intergenic	ENSG00000229280.1	-53955
chr1	4517083	4517513	Distal Intergenic	ENSG00000235054.1	44972	chr1	4299961	4300605	Distal Intergenic	ENSG00000229280.1	-64002
chr1	4522550	4522811	Distal Intergenic	ENSG00000235054.1	50439	chr1	4312701	4312969	Distal Intergenic	ENSG00000229280.1	-76742
chr1	4525004	4525335	Distal Intergenic	ENSG00000235054.1	52893	chr1	4316362	4316835	Distal Intergenic	ENSG00000229280.1	-80403
chr1	4526002	4526463	Distal Intergenic	ENSG00000235054.1	53891	chr1	4318643	4318858	Distal Intergenic	ENSG00000229280.1	-82684
chr1	4526992	4528013	Distal Intergenic	ENSG00000235054.1	54881	chr1	4327975	4328346	Distal Intergenic	ENSG00000229280.1	-92016
chr1	4528717	4529157	Distal Intergenic	ENSG00000235054.1	56606	chr1	4329220	4329764	Distal Intergenic	ENSG00000229280.1	-93261
chr1	4535417	4535760	Distal Intergenic	ENSG00000235054.1	63306	chr1	4332118	4332843	Distal Intergenic	ENSG00000229280.1	-96159
chr1	4540117	4540357	Distal Intergenic	ENSG00000235054.1	68006	chr1	4335817	4336032	Distal Intergenic	ENSG00000229280.1	-99858
chr1	4541346	4541706	Distal Intergenic	ENSG00000235054.1	69235	chr1	4342730	4343016	Distal Intergenic	ENSG00000229280.1	-106771
chr1	4541995	4542281	Distal Intergenic	ENSG00000235054.1	69884	chr1	4351046	4351531	Distal Intergenic	ENSG00000229280.1	-115087
chr1	4542978	4544107	Distal Intergenic	ENSG00000227169.2	68098	chr1	4354730	4355188	Distal Intergenic	ENSG00000235054.1	-116923
chr1	4546160	4547209	Distal Intergenic	ENSG00000227169.2	64996	chr1	4358782	4359063	Distal Intergenic	ENSG00000235054.1	-113048
chr1	4547804	4548044	Distal Intergenic	ENSG00000227169.2	64161	chr1	4360011	4361379	Distal Intergenic	ENSG00000235054.1	-110732
chr1	4548477	4549376	Distal Intergenic	ENSG00000227169.2	62829	chr1	4363650	4363865	Distal Intergenic	ENSG00000235054.1	-108246
chr1	4549756	4550073	Distal Intergenic	ENSG00000227169.2	62132	chr1	4364073	4364386	Distal Intergenic	ENSG00000235054.1	-107725
chr1	4551328	4551834	Distal Intergenic	ENSG00000227169.2	60371	chr1	4368622	4369085	Distal Intergenic	ENSG00000235054.1	-103026
chr1	4553387	4553627	Distal Intergenic	ENSG00000227169.2	58578	chr1	4370020	4370370	Distal Intergenic	ENSG00000235054.1	-101741
chr1	4555108	4555348	Distal Intergenic	ENSG00000227169.2	56857	chr1	4378766	4379259	Distal Intergenic	ENSG00000235054.1	-92852
chr1	4560922	4561522	Distal Intergenic	ENSG00000227169.2	50683	chr1	4384463	4384739	Distal Intergenic	ENSG00000235054.1	-87372
chr1	4563241	4563581	Distal Intergenic	ENSG00000227169.2	48624	chr1	4386267	4386760	Distal Intergenic	ENSG00000235054.1	-85351
chr1	4565186	4565492	Distal Intergenic	ENSG00000227169.2	46713	chr1	4387417	4387740	Distal Intergenic	ENSG00000235054.1	-84371
chr1	4566586	4566830	Distal Intergenic	ENSG00000227169.2	45375	chr1	4387923	4388277	Distal Intergenic	ENSG00000235054.1	-83834
chr1	4567114	4567722	Distal Intergenic	ENSG00000227169.2	44483	chr1	4388883	4389218	Distal Intergenic	ENSG00000235054.1	-82893
chr1	4568182	4568422	Distal Intergenic	ENSG00000227169.2	43783	chr1	4389398	4389785	Distal Intergenic	ENSG00000235054.1	-82326
chr1	4569551	4570208	Distal Intergenic	ENSG00000227169.2	41997	chr1	4393424	4393810	Distal Intergenic	ENSG00000235054.1	-78301
chr1	4570414	4571486	Distal Intergenic	ENSG00000227169.2	40719	chr1	4395881	4396217	Distal Intergenic	ENSG00000235054.1	-75894
chr1	4572306	4572577	Distal Intergenic	ENSG00000227169.2	39628	chr1	4398323	4398548	Distal Intergenic	ENSG00000235054.1	-73563
chr1	4572879	4573286	Distal Intergenic	ENSG00000227169.2	38919	chr1	4398751	4399005	Distal Intergenic	ENSG00000235054.1	-73106
chr1	4573528	4573845	Distal Intergenic	ENSG00000227169.2	38360	chr1	4401518	4401936	Distal Intergenic	ENSG00000235054.1	-70175
chr1	4574305	4574692	Distal Intergenic	ENSG00000227169.2	37513	chr1	4402410	4402897	Distal Intergenic	ENSG00000235054.1	-69214
chr1	4575453	4576149	Distal Intergenic	ENSG00000227169.2	36056	chr1	4403800	4404151	Distal Intergenic	ENSG00000235054.1	-67960
chr1	4580186	4580426	Distal Intergenic	ENSG00000227169.2	31779	chr1	4404435	4404760	Distal Intergenic	ENSG00000235054.1	-67351
chr1	4585397	4585637	Distal Intergenic	ENSG00000227169.2	26568	chr1	4406740	4407051	Distal Intergenic	ENSG00000235054.1	-65060
chr1	4587801	4588309	Distal Intergenic	ENSG00000227169.2	23896	chr1	4411503	4411826	Distal Intergenic	ENSG00000235054.1	-60285
chr1	4592292	4592659	Distal Intergenic	ENSG00000227169.2	19546	chr1	4411990	4412209	Distal Intergenic	ENSG00000235054.1	-59902
chr1	4592996	4593348	Distal Intergenic	ENSG00000227169.2	18857	chr1	4413719	4413934	Distal Intergenic	ENSG00000235054.1	-58177
chr1	4614323	4614592	Distal Intergenic	ENSG00000227169.2	-2118	chr1	4415670	4416926	Distal Intergenic	ENSG00000235054.1	-55185
chr1	4615216	4615572	Distal Intergenic	ENSG00000227169.2	-3011	chr1	4417962	4418271	Distal Intergenic	ENSG00000235054.1	-53840
chr1	4619008	4619433	Distal Intergenic	ENSG00000227169.2	-6803	chr1	4420498	4420713	Distal Intergenic	ENSG00000235054.1	-51398
chr1	4621664	4622622	Distal Intergenic	ENSG00000232596.1	-8986	chr1	4423283	4423586	Distal Intergenic	ENSG00000235054.1	-48525
chr1	4630599	4630839	Promoter	ENSG00000232596.1	-769	chr1	4425667	4426443	Distal Intergenic	ENSG00000235054.1	-45668
chr1	4631726	4632022	Promoter	ENSG00000232596.1	118	chr1	4427705	4428071	Distal Intergenic	ENSG00000235054.1	-44040
chr1	4646752	4647103	Distal Intergenic	ENSG00000232596.1	15144	chr1	4428693	4429057	Distal Intergenic	ENSG00000235054.1	-43054
chr1	4651881	4652411	Distal Intergenic	ENSG00000232596.1	20273	chr1	4436533	4436917	Distal Intergenic	ENSG00000235054.1	-35194
chr1	4653343	4653712	Distal Intergenic	ENSG00000232596.1	21735	chr1	4437527	4438031	Distal Intergenic	ENSG00000235054.1	-34080
chr1	4655083	4655323	Distal Intergenic	ENSG00000232596.1	23475	chr1	4442055	4442341	Distal Intergenic	ENSG00000235054.1	-29770
chr1	4658865	4661060	Distal Intergenic	ENSG00000232596.1	27257	chr1	4444159	4444397	Distal Intergenic	ENSG00000235054.1	-27714
chr1	4661509	4662318	Distal Intergenic	ENSG00000232596.1	29901	chr1	4445305	4445538	Distal Intergenic	ENSG00000235054.1	-26573
chr1	4663334	4663605	Distal Intergenic	ENSG00000232596.1	31726	chr1	4448241	4448512	Distal Intergenic	ENSG00000235054.1	-23599
chr1	4664265	4664767	Distal Intergenic	ENSG00000232596.1	32657	chr1	4450736	4451356	Distal Intergenic	ENSG00000235054.1	-20755
chr1	4668399	4668738	Distal Intergenic	ENSG00000232596.1	36791	chr1	4456560	4456775	Distal Intergenic	ENSG00000235054.1	-15336
chr1	4671292	4672011	Distal Intergenic	ENSG00000232596.1	39684	chr1	4460567	4460929	Distal Intergenic	ENSG00000235054.1	-11182
chr1	4674371	4674611	Distal Intergenic	ENSG00000196581.6	-40181	chr1	4461507	4461767	Distal Intergenic	ENSG00000235054.1	-10344
chr1	4675280	4675929	Distal Intergenic	ENSG00000196581.6	-38863	chr1	4465526	4466454	Distal Intergenic	ENSG00000235054.1	-5657
chr1	4676846	4677210	Distal Intergenic	ENSG00000196581.6	-37582	chr1	4475886	4476152	Intron (ENST00000423197.1/ENSG00000235054.1, intron 2 of 5)	ENSG00000235054.1	3775
chr1	4681493	4682158	Distal Intergenic	ENSG00000196581.6	-32634	chr1	4480590	4480899	Intron (ENST00000423197.1/ENSG00000235054.1, intron 3 of 5)	ENSG00000235054.1	8479
chr1	4683056	4683645	Distal Intergenic	ENSG00000196581.6	-31147	chr1	4483299	4483567	Exon (ENST00000423197.1/ENSG00000235054.1, exon 5 of 6)	ENSG00000235054.1	11188
chr1	4685503	4686313	Distal Intergenic	ENSG00000196581.6	-28479	chr1	4484447	4485243	Exon (ENST00000423197.1/ENSG00000235054.1, exon 6 of 6)	ENSG00000235054.1	12336
chr1	4686629	4687076	Distal Intergenic	ENSG00000196581.6	-27716	chr1	4499356	4499584	Distal Intergenic	ENSG00000235054.1	27245
chr1	4688389	4688845	Distal Intergenic	ENSG00000196581.6	-25947	chr1	4500687	4500956	Distal Intergenic	ENSG00000235054.1	28576
chr1	4690269	4690509	Distal Intergenic	ENSG00000196581.6	-24283	chr1	4506207	4506422	Distal Intergenic	ENSG00000235054.1	34096
chr1	4693465	4693761	Distal Intergenic	ENSG00000196581.6	-21031	chr1	4511388	4511632	Distal Intergenic	ENSG00000235054.1	39277
chr1	4694179	4695072	Distal Intergenic	ENSG00000196581.6	-19720	chr1	4521662	4522202	Distal Intergenic	ENSG00000235054.1	49551
chr1	4696208	4696814	Distal Intergenic	ENSG00000196581.6	-17978	chr1	4522691	4523600	Distal Intergenic	ENSG00000235054.1	50580
chr1	4702795	4703058	Distal Intergenic	ENSG00000196581.6	-11734	chr1	4524890	4525376	Distal Intergenic	ENSG00000235054.1	52779
chr1	4704999	4705258	Distal Intergenic	ENSG00000196581.6	-9534	chr1	4526594	4526919	Distal Intergenic	ENSG00000235054.1	54483
chr1	4705815	4706055	Distal Intergenic	ENSG00000196581.6	-8737	chr1	4527111	4527365	Distal Intergenic	ENSG00000235054.1	55000
chr1	4708337	4708990	Distal Intergenic	ENSG00000196581.6	-5802	chr1	4529676	4530020	Distal Intergenic	ENSG00000235054.1	57565
chr1	4713866	4714303	Promoter	ENSG00000196581.6	-489	chr1	4531127	4531439	Distal Intergenic	ENSG00000235054.1	59016
chr1	4717847	4718087	Intron (ENST00000378190.3/ENSG00000196581.6, intron 1 of 5)	ENSG00000196581.6	2742	chr1	4539729	4539961	Distal Intergenic	ENSG00000235054.1	67618
chr1	4718478	4718767	Intron (ENST00000378190.3/ENSG00000196581.6, intron 1 of 5)	ENSG00000196581.6	3373	chr1	4541287	4541502	Distal Intergenic	ENSG00000235054.1	69176
chr1	4719527	4719882	Intron (ENST00000378190.3/ENSG00000196581.6, intron 1 of 5)	ENSG00000196581.6	4422	chr1	4541989	4542204	Distal Intergenic	ENSG00000235054.1	69878
chr1	4722362	4723140	Intron (ENST00000378190.3/ENSG00000196581.6, intron 1 of 5)	ENSG00000196581.6	7257	chr1	4546690	4546905	Distal Intergenic	ENSG00000227169.2	65300
chr1	4726406	4726797	Intron (ENST00000378190.3/ENSG00000196581.6, intron 1 of 5)	ENSG00000196581.6	11301	chr1	4547209	4547669	Distal Intergenic	ENSG00000227169.2	64536
chr1	4732582	4733128	Intron (ENST00000378190.3/ENSG00000196581.6, intron 1 of 5)	ENSG00000196581.6	17477	chr1	4547953	4548206	Distal Intergenic	ENSG00000227169.2	63999
chr1	4739634	4739895	Intron (ENST00000378190.3/ENSG00000196581.6, intron 1 of 5)	ENSG00000196581.6	24529	chr1	4553147	4553581	Distal Intergenic	ENSG00000227169.2	58624
chr1	4741824	4742639	Intron (ENST00000378190.3/ENSG00000196581.6, intron 1 of 5)	ENSG00000196581.6	26719	chr1	4553908	4554353	Distal Intergenic	ENSG00000227169.2	57852
chr1	4743326	4743617	Intron (ENST00000378190.3/ENSG00000196581.6, intron 1 of 5)	ENSG00000196581.6	-27598	chr1	4560373	4561067	Distal Intergenic	ENSG00000227169.2	51138
chr1	4743876	4744139	Intron (ENST00000378190.3/ENSG00000196581.6, intron 1 of 5)	ENSG00000196581.6	-27076	chr1	4563832	4564174	Distal Intergenic	ENSG00000227169.2	48031
chr1	4744820	4745060	Intron (ENST00000378190.3/ENSG00000196581.6, intron 1 of 5)	ENSG00000196581.6	-26155	chr1	4570113	4571114	Distal Intergenic	ENSG00000227169.2	41091
chr1	4746044	4746898	Intron (ENST00000378190.3/ENSG00000196581.6, intron 1 of 5)	ENSG00000196581.6	-24317	chr1	4571456	4572127	Distal Intergenic	ENSG00000227169.2	40078
chr1	4747100	4747399	Intron (ENST00000378190.3/ENSG00000196581.6, intron 1 of 5)	ENSG00000196581.6	-23816	chr1	4572855	4573366	Distal Intergenic	ENSG00000227169.2	38839
chr1	4748869	4749189	Intron (ENST00000378190.3/ENSG00000196581.6, intron 1 of 5)	ENSG00000196581.6	-22026	chr1	4573733	4574697	Distal Intergenic	ENSG00000227169.2	37508
chr1	4750663	4751785	Intron (ENST00000378190.3/ENSG00000196581.6, intron 1 of 5)	ENSG00000196581.6	-19430	chr1	4575335	4576425	Distal Intergenic	ENSG00000227169.2	35780
chr1	4752764	4753532	Intron (ENST00000378190.3/ENSG00000196581.6, intron 1 of 5)	ENSG00000196581.6	-17683	chr1	4576849	4577308	Distal Intergenic	ENSG00000227169.2	34897
chr1	4754578	4755041	Intron (ENST00000378190.3/ENSG00000196581.6, intron 1 of 5)	ENSG00000196581.6	-16174	chr1	4579983	4580404	Distal Intergenic	ENSG00000227169.2	31801
chr1	4755882	4756122	Intron (ENST00000378190.3/ENSG00000196581.6, intron 1 of 5)	ENSG00000196581.6	-15093	chr1	4588497	4588910	Distal Intergenic	ENSG00000227169.2	23295
chr1	4756292	4756572	Intron (ENST00000378190.3/ENSG00000196581.6, intron 1 of 5)	ENSG00000196581.6	-14643	chr1	4590609	4590885	Distal Intergenic	ENSG00000227169.2	21320
chr1	4758571	4758954	Intron (ENST00000378190.3/ENSG00000196581.6, intron 1 of 5)	ENSG00000196581.6	-12261	chr1	4592443	4592658	Distal Intergenic	ENSG00000227169.2	19547
chr1	4759193	4759746	Intron (ENST00000378190.3/ENSG00000196581.6, intron 1 of 5)	ENSG00000196581.6	-11469	chr1	4608551	4608823	Distal Intergenic	ENSG00000227169.2	3382
chr1	4760593	4760972	Intron (ENST00000378190.3/ENSG00000196581.6, intron 1 of 5)	ENSG00000196581.6	-10243	chr1	4613285	4613553	Distal Intergenic	ENSG00000227169.2	-1080
chr1	4765657	4766048	Intron (ENST00000378190.3/ENSG00000196581.6, intron 1 of 5)	ENSG00000196581.6	-5167	chr1	4615092	4615314	Distal Intergenic	ENSG00000227169.2	-2887
chr1	4769546	4770003	Intron (ENST00000378190.3/ENSG00000196581.6, intron 1 of 5)	ENSG00000196581.6	-1212	chr1	4622596	4622846	Distal Intergenic	ENSG00000232596.1	-8762
chr1	4770822	4771248	Promoter	ENSG00000196581.6	0	chr1	4623793	4624109	Distal Intergenic	ENSG00000232596.1	-7499
chr1	4772439	4772776	Exon (ENST00000378190.3/ENSG00000196581.6, exon 2 of 6)	ENSG00000196581.6	1224	chr1	4626397	4626623	Distal Intergenic	ENSG00000232596.1	-4985
chr1	4773375	4773798	Intron (ENST00000378190.3/ENSG00000196581.6, intron 2 of 5)	ENSG00000196581.6	2160	chr1	4626917	4627324	Distal Intergenic	ENSG00000232596.1	-4284
chr1	4777760	4778121	Intron (ENST00000378190.3/ENSG00000196581.6, intron 2 of 5)	ENSG00000196581.6	6545	chr1	4627613	4627828	Distal Intergenic	ENSG00000232596.1	-3780
chr1	4778970	4779330	Intron (ENST00000378190.3/ENSG00000196581.6, intron 2 of 5)	ENSG00000196581.6	7755	chr1	4635743	4636026	Intron (ENST00000420522.1/ENSG00000232596.1, intron 2 of 4)	ENSG00000232596.1	4135
chr1	4780668	4781298	Intron (ENST00000378190.3/ENSG00000196581.6, intron 2 of 5)	ENSG00000196581.6	9453	chr1	4636194	4636415	Intron (ENST00000420522.1/ENSG00000232596.1, intron 2 of 4)	ENSG00000232596.1	4586
chr1	4781658	4782042	Intron (ENST00000378190.3/ENSG00000196581.6, intron 2 of 5)	ENSG00000196581.6	10443	chr1	4645030	4645623	Distal Intergenic	ENSG00000232596.1	13422
chr1	4782371	4782611	Intron (ENST00000378190.3/ENSG00000196581.6, intron 2 of 5)	ENSG00000196581.6	11156	chr1	4645874	4646572	Distal Intergenic	ENSG00000232596.1	14266
chr1	4783844	4784086	Intron (ENST00000378190.3/ENSG00000196581.6, intron 2 of 5)	ENSG00000196581.6	12629	chr1	4647026	4647241	Distal Intergenic	ENSG00000232596.1	15418
chr1	4784550	4785179	Intron (ENST00000378190.3/ENSG00000196581.6, intron 2 of 5)	ENSG00000196581.6	13335	chr1	4647755	4647970	Distal Intergenic	ENSG00000232596.1	16147
chr1	4786118	4786827	Intron (ENST00000378190.3/ENSG00000196581.6, intron 2 of 5)	ENSG00000196581.6	14903	chr1	4652241	4652568	Distal Intergenic	ENSG00000232596.1	20633
chr1	4788147	4788520	Intron (ENST00000378190.3/ENSG00000196581.6, intron 2 of 5)	ENSG00000196581.6	16932	chr1	4653359	4653766	Distal Intergenic	ENSG00000232596.1	21751
chr1	4788789	4789484	Intron (ENST00000378190.3/ENSG00000196581.6, intron 2 of 5)	ENSG00000196581.6	17574	chr1	4655043	4655608	Distal Intergenic	ENSG00000232596.1	23435
chr1	4789769	4790009	Intron (ENST00000378190.3/ENSG00000196581.6, intron 2 of 5)	ENSG00000196581.6	18554	chr1	4656948	4657312	Distal Intergenic	ENSG00000232596.1	25340
chr1	4790343	4790698	Intron (ENST00000378190.3/ENSG00000196581.6, intron 2 of 5)	ENSG00000196581.6	19128	chr1	4660916	4661238	Distal Intergenic	ENSG00000232596.1	29308
chr1	4792719	4793005	Intron (ENST00000378190.3/ENSG00000196581.6, intron 2 of 5)	ENSG00000196581.6	21504	chr1	4661522	4661828	Distal Intergenic	ENSG00000232596.1	29914
chr1	4798989	4799351	Intron (ENST00000378190.3/ENSG00000196581.6, intron 2 of 5)	ENSG00000196581.6	27774	chr1	4662151	4662415	Distal Intergenic	ENSG00000232596.1	30543
chr1	4801757	4802158	Intron (ENST00000378190.3/ENSG00000196581.6, intron 2 of 5)	ENSG00000196581.6	30542	chr1	4673780	4674006	Distal Intergenic	ENSG00000196581.6	-40786
chr1	4802325	4802565	Intron (ENST00000378190.3/ENSG00000196581.6, intron 2 of 5)	ENSG00000196581.6	31110	chr1	4674241	4675506	Distal Intergenic	ENSG00000196581.6	-39286
chr1	4804691	4805441	Intron (ENST00000378190.3/ENSG00000196581.6, intron 2 of 5)	ENSG00000196581.6	33476	chr1	4676834	4677050	Distal Intergenic	ENSG00000196581.6	-37742
chr1	4806409	4806657	Intron (ENST00000378190.3/ENSG00000196581.6, intron 2 of 5)	ENSG00000196581.6	35194	chr1	4677315	4677718	Distal Intergenic	ENSG00000196581.6	-37074
chr1	4806904	4807703	Intron (ENST00000378190.3/ENSG00000196581.6, intron 2 of 5)	ENSG00000196581.6	35689	chr1	4682844	4683085	Distal Intergenic	ENSG00000196581.6	-31707
chr1	4808954	4809224	Intron (ENST00000378190.3/ENSG00000196581.6, intron 2 of 5)	ENSG00000196581.6	37739	chr1	4683765	4684746	Distal Intergenic	ENSG00000196581.6	-30046
chr1	4809942	4810585	Intron (ENST00000378190.3/ENSG00000196581.6, intron 2 of 5)	ENSG00000196581.6	38727	chr1	4684976	4686856	Distal Intergenic	ENSG00000196581.6	-27936
chr1	4810913	4811823	Intron (ENST00000378190.3/ENSG00000196581.6, intron 2 of 5)	ENSG00000196581.6	39698	chr1	4687897	4688197	Distal Intergenic	ENSG00000196581.6	-26595
chr1	4812504	4813092	Intron (ENST00000378190.3/ENSG00000196581.6, intron 2 of 5)	ENSG00000196581.6	41289	chr1	4690008	4690293	Distal Intergenic	ENSG00000196581.6	-24499
chr1	4814985	4815256	Intron (ENST00000378190.3/ENSG00000196581.6, intron 2 of 5)	ENSG00000196581.6	43770	chr1	4691654	4691869	Distal Intergenic	ENSG00000196581.6	-22923
chr1	4815891	4817259	Intron (ENST00000378190.3/ENSG00000196581.6, intron 2 of 5)	ENSG00000196581.6	44676	chr1	4693502	4693744	Distal Intergenic	ENSG00000196581.6	-21048
chr1	4817628	4818089	Intron (ENST00000378190.3/ENSG00000196581.6, intron 2 of 5)	ENSG00000196581.6	46413	chr1	4694237	4694883	Distal Intergenic	ENSG00000196581.6	-19909
chr1	4818756	4819313	Intron (ENST00000378190.3/ENSG00000196581.6, intron 2 of 5)	ENSG00000196581.6	47541	chr1	4696788	4697051	Distal Intergenic	ENSG00000196581.6	-17741
chr1	4824700	4824991	Intron (ENST00000378190.3/ENSG00000196581.6, intron 2 of 5)	ENSG00000196581.6	53485	chr1	4697906	4698396	Distal Intergenic	ENSG00000196581.6	-16396
chr1	4828988	4830323	Exon (ENST00000378190.3/ENSG00000196581.6, exon 3 of 6)	ENSG00000196581.6	57773	chr1	4713167	4713382	Distal Intergenic	ENSG00000196581.6	-1410
chr1	4831304	4831573	Intron (ENST00000378190.3/ENSG00000196581.6, intron 3 of 5)	ENSG00000196581.6	60089	chr1	4717543	4717828	Intron (ENST00000378190.3/ENSG00000196581.6, intron 1 of 5)	ENSG00000196581.6	2438
chr1	4832267	4832673	Exon (ENST00000378190.3/ENSG00000196581.6, exon 4 of 6)	ENSG00000196581.6	61052	chr1	4718073	4718710	Intron (ENST00000378190.3/ENSG00000196581.6, intron 1 of 5)	ENSG00000196581.6	2968
chr1	4836504	4836974	Intron (ENST00000378190.3/ENSG00000196581.6, intron 5 of 5)	ENSG00000196581.6	65289	chr1	4719240	4719967	Intron (ENST00000378190.3/ENSG00000196581.6, intron 1 of 5)	ENSG00000196581.6	4135
chr1	4837138	4837466	3' UTR	ENSG00000196581.6	65923	chr1	4724300	4724638	Intron (ENST00000378190.3/ENSG00000196581.6, intron 1 of 5)	ENSG00000196581.6	9195
chr1	4838043	4838469	Intron (ENST00000378191.4/ENSG00000196581.6, intron 5 of 5)	ENSG00000196581.6	66828	chr1	4724807	4725055	Intron (ENST00000378190.3/ENSG00000196581.6, intron 1 of 5)	ENSG00000196581.6	9702
chr1	4839287	4839527	Intron (ENST00000378191.4/ENSG00000196581.6, intron 5 of 5)	ENSG00000196581.6	68072	chr1	4727423	4727742	Intron (ENST00000378190.3/ENSG00000196581.6, intron 1 of 5)	ENSG00000196581.6	12318
chr1	4840991	4841411	Intron (ENST00000378191.4/ENSG00000196581.6, intron 5 of 5)	ENSG00000196581.6	69776	chr1	4731776	4732176	Intron (ENST00000378190.3/ENSG00000196581.6, intron 1 of 5)	ENSG00000196581.6	16671
chr1	4845242	4845597	3' UTR	ENSG00000196581.6	74027	chr1	4735669	4736111	Intron (ENST00000378190.3/ENSG00000196581.6, intron 1 of 5)	ENSG00000196581.6	20564
chr1	4848128	4848378	3' UTR	ENSG00000196581.6	76913	chr1	4737983	4738418	Intron (ENST00000378190.3/ENSG00000196581.6, intron 1 of 5)	ENSG00000196581.6	22878
chr1	4853075	4854065	Distal Intergenic	ENSG00000196581.6	81860	chr1	4740878	4741093	Intron (ENST00000378190.3/ENSG00000196581.6, intron 1 of 5)	ENSG00000196581.6	25773
chr1	4855995	4856390	Distal Intergenic	ENSG00000196581.6	84780	chr1	4743660	4743998	Intron (ENST00000378190.3/ENSG00000196581.6, intron 1 of 5)	ENSG00000196581.6	-27217
chr1	4858292	4858532	Distal Intergenic	ENSG00000196581.6	87077	chr1	4744567	4744975	Intron (ENST00000378190.3/ENSG00000196581.6, intron 1 of 5)	ENSG00000196581.6	-26240
chr1	4861011	4861251	Distal Intergenic	ENSG00000196581.6	89796	chr1	4746575	4746790	Intron (ENST00000378190.3/ENSG00000196581.6, intron 1 of 5)	ENSG00000196581.6	-24425
chr1	4880717	4880974	Distal Intergenic	ENSG00000196581.6	109502	chr1	4747273	4747488	Intron (ENST00000378190.3/ENSG00000196581.6, intron 1 of 5)	ENSG00000196581.6	-23727
chr1	4888369	4889389	Distal Intergenic	ENSG00000196581.6	117154	chr1	4749009	4749792	Intron (ENST00000378190.3/ENSG00000196581.6, intron 1 of 5)	ENSG00000196581.6	-21423
chr1	4892976	4893256	Distal Intergenic	ENSG00000196581.6	121761	chr1	4750212	4750597	Intron (ENST00000378190.3/ENSG00000196581.6, intron 1 of 5)	ENSG00000196581.6	-20618
chr1	4896821	4897172	Distal Intergenic	ENSG00000196581.6	125606	chr1	4750982	4751311	Intron (ENST00000378190.3/ENSG00000196581.6, intron 1 of 5)	ENSG00000196581.6	-19904
chr1	4898077	4898376	Distal Intergenic	ENSG00000196581.6	126862	chr1	4751579	4752054	Intron (ENST00000378190.3/ENSG00000196581.6, intron 1 of 5)	ENSG00000196581.6	-19161
chr1	4911652	4912218	Distal Intergenic	ENSG00000196581.6	140437	chr1	4753510	4753981	Intron (ENST00000378190.3/ENSG00000196581.6, intron 1 of 5)	ENSG00000196581.6	-17234
chr1	4912925	4913344	Distal Intergenic	ENSG00000196581.6	141710	chr1	4754245	4754460	Intron (ENST00000378190.3/ENSG00000196581.6, intron 1 of 5)	ENSG00000196581.6	-16755
chr1	4929085	4929417	Distal Intergenic	ENSG00000196581.6	157870	chr1	4754693	4755240	Intron (ENST00000378190.3/ENSG00000196581.6, intron 1 of 5)	ENSG00000196581.6	-15975
chr1	4931241	4931959	Distal Intergenic	ENSG00000196581.6	160026	chr1	4755785	4757097	Intron (ENST00000378190.3/ENSG00000196581.6, intron 1 of 5)	ENSG00000196581.6	-14118
chr1	4935110	4935436	Distal Intergenic	ENSG00000196581.6	163895	chr1	4758773	4759060	Intron (ENST00000378190.3/ENSG00000196581.6, intron 1 of 5)	ENSG00000196581.6	-12155
chr1	4941271	4941547	Distal Intergenic	ENSG00000196581.6	170056	chr1	4760918	4761350	Intron (ENST00000378190.3/ENSG00000196581.6, intron 1 of 5)	ENSG00000196581.6	-9865
chr1	4955985	4956393	Distal Intergenic	ENSG00000196581.6	184770	chr1	4761844	4762312	Intron (ENST00000378190.3/ENSG00000196581.6, intron 1 of 5)	ENSG00000196581.6	-8903
chr1	4957832	4958189	Distal Intergenic	ENSG00000196581.6	186617	chr1	4763662	4764205	Intron (ENST00000378190.3/ENSG00000196581.6, intron 1 of 5)	ENSG00000196581.6	-7010
chr1	4959980	4960288	Distal Intergenic	ENSG00000196581.6	188765	chr1	4765690	4766049	Intron (ENST00000378190.3/ENSG00000196581.6, intron 1 of 5)	ENSG00000196581.6	-5166
chr1	4961845	4962277	Distal Intergenic	ENSG00000231510.1	188682	chr1	4767336	4767614	Intron (ENST00000378190.3/ENSG00000196581.6, intron 1 of 5)	ENSG00000196581.6	-3601
chr1	4965411	4965664	Distal Intergenic	ENSG00000231510.1	185295	chr1	4767797	4768059	Intron (ENST00000378190.3/ENSG00000196581.6, intron 1 of 5)	ENSG00000196581.6	-3156
chr1	4969053	4969293	Distal Intergenic	ENSG00000231510.1	181666	chr1	4768331	4768856	Intron (ENST00000378190.3/ENSG00000196581.6, intron 1 of 5)	ENSG00000196581.6	-2359
chr1	4969806	4970217	Distal Intergenic	ENSG00000231510.1	180742	chr1	4771178	4771496	Promoter	ENSG00000196581.6	0
chr1	4971490	4972106	Distal Intergenic	ENSG00000231510.1	178853	chr1	4771642	4771922	Promoter	ENSG00000196581.6	427
chr1	4974114	4974524	Distal Intergenic	ENSG00000231510.1	176435	chr1	4772333	4772788	Exon (ENST00000378190.3/ENSG00000196581.6, exon 2 of 6)	ENSG00000196581.6	1118
chr1	4978752	4978992	Distal Intergenic	ENSG00000231510.1	171967	chr1	4773987	4774382	Intron (ENST00000378190.3/ENSG00000196581.6, intron 2 of 5)	ENSG00000196581.6	2772
chr1	4979164	4979408	Distal Intergenic	ENSG00000231510.1	171551	chr1	4777709	4777954	Intron (ENST00000378190.3/ENSG00000196581.6, intron 2 of 5)	ENSG00000196581.6	6494
chr1	4984525	4984765	Distal Intergenic	ENSG00000231510.1	166194	chr1	4778874	4779089	Intron (ENST00000378190.3/ENSG00000196581.6, intron 2 of 5)	ENSG00000196581.6	7659
chr1	4985210	4985543	Distal Intergenic	ENSG00000231510.1	165416	chr1	4781805	4782345	Intron (ENST00000378190.3/ENSG00000196581.6, intron 2 of 5)	ENSG00000196581.6	10590
chr1	4993062	4993412	Distal Intergenic	ENSG00000231510.1	157547	chr1	4784090	4784428	Intron (ENST00000378190.3/ENSG00000196581.6, intron 2 of 5)	ENSG00000196581.6	12875
chr1	4994443	4994683	Distal Intergenic	ENSG00000231510.1	156276	chr1	4784586	4784844	Intron (ENST00000378190.3/ENSG00000196581.6, intron 2 of 5)	ENSG00000196581.6	13371
chr1	5001285	5001562	Distal Intergenic	ENSG00000231510.1	149397	chr1	4785172	4786311	Intron (ENST00000378190.3/ENSG00000196581.6, intron 2 of 5)	ENSG00000196581.6	13957
chr1	5020682	5020990	Distal Intergenic	ENSG00000231510.1	129969	chr1	4786639	4787039	Intron (ENST00000378190.3/ENSG00000196581.6, intron 2 of 5)	ENSG00000196581.6	15424
chr1	5021287	5021872	Distal Intergenic	ENSG00000231510.1	129087	chr1	4787346	4788054	Intron (ENST00000378190.3/ENSG00000196581.6, intron 2 of 5)	ENSG00000196581.6	16131
chr1	5022582	5023025	Distal Intergenic	ENSG00000231510.1	127934	chr1	4788815	4789142	Intron (ENST00000378190.3/ENSG00000196581.6, intron 2 of 5)	ENSG00000196581.6	17600
chr1	5023234	5023544	Distal Intergenic	ENSG00000231510.1	127415	chr1	4789648	4790140	Intron (ENST00000378190.3/ENSG00000196581.6, intron 2 of 5)	ENSG00000196581.6	18433
chr1	5025012	5025261	Distal Intergenic	ENSG00000231510.1	125698	chr1	4792756	4793155	Intron (ENST00000378190.3/ENSG00000196581.6, intron 2 of 5)	ENSG00000196581.6	21541
chr1	5025989	5026612	Distal Intergenic	ENSG00000231510.1	124347	chr1	4793475	4793771	Intron (ENST00000378190.3/ENSG00000196581.6, intron 2 of 5)	ENSG00000196581.6	22260
chr1	5027389	5027679	Distal Intergenic	ENSG00000231510.1	123280	chr1	4794506	4794846	Intron (ENST00000378190.3/ENSG00000196581.6, intron 2 of 5)	ENSG00000196581.6	23291
chr1	5028807	5029115	Distal Intergenic	ENSG00000231510.1	121844	chr1	4795852	4796068	Intron (ENST00000378190.3/ENSG00000196581.6, intron 2 of 5)	ENSG00000196581.6	24637
chr1	5033220	5033601	Distal Intergenic	ENSG00000231510.1	117358	chr1	4797109	4797624	Intron (ENST00000378190.3/ENSG00000196581.6, intron 2 of 5)	ENSG00000196581.6	25894
chr1	5034936	5035176	Distal Intergenic	ENSG00000231510.1	115783	chr1	4805542	4805957	Intron (ENST00000378190.3/ENSG00000196581.6, intron 2 of 5)	ENSG00000196581.6	34327
chr1	5036477	5036717	Distal Intergenic	ENSG00000231510.1	114242	chr1	4807912	4808341	Intron (ENST00000378190.3/ENSG00000196581.6, intron 2 of 5)	ENSG00000196581.6	36697
chr1	5044373	5044947	Distal Intergenic	ENSG00000231510.1	106012	chr1	4810522	4810767	Intron (ENST00000378190.3/ENSG00000196581.6, intron 2 of 5)	ENSG00000196581.6	39307
chr1	5057862	5058204	Distal Intergenic	ENSG00000231510.1	92755	chr1	4811045	4811920	Intron (ENST00000378190.3/ENSG00000196581.6, intron 2 of 5)	ENSG00000196581.6	39830
chr1	5060695	5060935	Distal Intergenic	ENSG00000231510.1	90024	chr1	4812287	4812757	Intron (ENST00000378190.3/ENSG00000196581.6, intron 2 of 5)	ENSG00000196581.6	41072
chr1	5069111	5069351	Distal Intergenic	ENSG00000231510.1	81608	chr1	4815003	4815643	Intron (ENST00000378190.3/ENSG00000196581.6, intron 2 of 5)	ENSG00000196581.6	43788
chr1	5069690	5070051	Distal Intergenic	ENSG00000231510.1	80908	chr1	4818170	4818703	Intron (ENST00000378190.3/ENSG00000196581.6, intron 2 of 5)	ENSG00000196581.6	46955
chr1	5070453	5070803	Distal Intergenic	ENSG00000231510.1	80156	chr1	4819998	4820213	Intron (ENST00000378190.3/ENSG00000196581.6, intron 2 of 5)	ENSG00000196581.6	48783
chr1	5074432	5074773	Distal Intergenic	ENSG00000231510.1	76186	chr1	4820591	4821409	Intron (ENST00000378190.3/ENSG00000196581.6, intron 2 of 5)	ENSG00000196581.6	49376
chr1	5106134	5106374	Distal Intergenic	ENSG00000231510.1	44585	chr1	4822398	4822810	Intron (ENST00000378190.3/ENSG00000196581.6, intron 2 of 5)	ENSG00000196581.6	51183
chr1	5109216	5109456	Distal Intergenic	ENSG00000231510.1	41503	chr1	4825318	4825628	Intron (ENST00000378190.3/ENSG00000196581.6, intron 2 of 5)	ENSG00000196581.6	54103
chr1	5163103	5163343	Distal Intergenic	ENSG00000231510.1	-12144	chr1	4829500	4830193	Exon (ENST00000378190.3/ENSG00000196581.6, exon 3 of 6)	ENSG00000196581.6	58285
chr1	5168279	5168587	Distal Intergenic	ENSG00000231510.1	-17320	chr1	4830340	4830718	Intron (ENST00000378190.3/ENSG00000196581.6, intron 3 of 5)	ENSG00000196581.6	59125
chr1	5171406	5171768	Distal Intergenic	ENSG00000231510.1	-20447	chr1	4831135	4831623	Intron (ENST00000378190.3/ENSG00000196581.6, intron 3 of 5)	ENSG00000196581.6	59920
chr1	5191788	5192083	Distal Intergenic	ENSG00000231510.1	-40829	chr1	4835889	4836259	Intron (ENST00000378190.3/ENSG00000196581.6, intron 5 of 5)	ENSG00000196581.6	64674
chr1	5203244	5203484	Distal Intergenic	ENSG00000231510.1	-52285	chr1	4838820	4839354	Intron (ENST00000378191.4/ENSG00000196581.6, intron 5 of 5)	ENSG00000196581.6	67605
chr1	5214827	5215268	Distal Intergenic	ENSG00000231510.1	-63868	chr1	4841767	4841982	Intron (ENST00000378191.4/ENSG00000196581.6, intron 5 of 5)	ENSG00000196581.6	70552
chr1	5220838	5221153	Distal Intergenic	ENSG00000231510.1	-69879	chr1	4842248	4842463	Intron (ENST00000378191.4/ENSG00000196581.6, intron 5 of 5)	ENSG00000196581.6	71033
chr1	5229593	5229833	Distal Intergenic	ENSG00000231510.1	-78634	chr1	4842648	4842863	3' UTR	ENSG00000196581.6	71433
chr1	5230556	5230910	Distal Intergenic	ENSG00000231510.1	-79597	chr1	4845188	4845913	3' UTR	ENSG00000196581.6	73973
chr1	5231372	5231713	Distal Intergenic	ENSG00000231510.1	-80413	chr1	4847171	4847386	3' UTR	ENSG00000196581.6	75956
chr1	5231879	5232122	Distal Intergenic	ENSG00000231510.1	-80920	chr1	4847570	4847812	3' UTR	ENSG00000196581.6	76355
chr1	5247180	5247420	Distal Intergenic	ENSG00000231510.1	-96221	chr1	4849373	4849859	3' UTR	ENSG00000196581.6	78158
chr1	5248377	5248701	Distal Intergenic	ENSG00000231510.1	-97418	chr1	4851495	4851795	3' UTR	ENSG00000196581.6	80280
chr1	5254875	5255555	Distal Intergenic	ENSG00000231510.1	-103916	chr1	4854486	4854701	Distal Intergenic	ENSG00000196581.6	83271
chr1	5260579	5260819	Distal Intergenic	ENSG00000231510.1	-109620	chr1	4857588	4857839	Distal Intergenic	ENSG00000196581.6	86373
chr1	5284051	5284365	Distal Intergenic	ENSG00000231510.1	-133092	chr1	4859913	4860128	Distal Intergenic	ENSG00000196581.6	88698
chr1	5286630	5286949	Distal Intergenic	ENSG00000231510.1	-135671	chr1	4861591	4862059	Distal Intergenic	ENSG00000196581.6	90376
chr1	5295780	5296149	Distal Intergenic	ENSG00000231510.1	-144821	chr1	4862803	4863018	Distal Intergenic	ENSG00000196581.6	91588
chr1	5300083	5300473	Distal Intergenic	ENSG00000231510.1	-149124	chr1	4882267	4882482	Distal Intergenic	ENSG00000196581.6	111052
chr1	5301279	5301620	Distal Intergenic	ENSG00000231510.1	-150320	chr1	4886501	4886716	Distal Intergenic	ENSG00000196581.6	115286
chr1	5302008	5302590	Distal Intergenic	ENSG00000231510.1	-151049	chr1	4887360	4887603	Distal Intergenic	ENSG00000196581.6	116145
chr1	5303166	5304150	Distal Intergenic	ENSG00000231510.1	-152207	chr1	4887782	4887997	Distal Intergenic	ENSG00000196581.6	116567
chr1	5305463	5306042	Distal Intergenic	ENSG00000231510.1	-154504	chr1	4888424	4888942	Distal Intergenic	ENSG00000196581.6	117209
chr1	5314518	5314782	Distal Intergenic	ENSG00000231510.1	-163559	chr1	4891008	4891264	Distal Intergenic	ENSG00000196581.6	119793
chr1	5320020	5320755	Distal Intergenic	ENSG00000231510.1	-169061	chr1	4912136	4912476	Distal Intergenic	ENSG00000196581.6	140921
chr1	5325719	5326024	Distal Intergenic	ENSG00000231510.1	-174760	chr1	4926766	4927263	Distal Intergenic	ENSG00000196581.6	155551
chr1	5326179	5326419	Distal Intergenic	ENSG00000231510.1	-175220	chr1	4928450	4928823	Distal Intergenic	ENSG00000196581.6	157235
chr1	5328853	5329236	Distal Intergenic	ENSG00000231510.1	-177894	chr1	4929140	4929355	Distal Intergenic	ENSG00000196581.6	157925
chr1	5329447	5329717	Distal Intergenic	ENSG00000231510.1	-178488	chr1	4929602	4929817	Distal Intergenic	ENSG00000196581.6	158387
chr1	5337317	5337903	Distal Intergenic	ENSG00000231510.1	-186358	chr1	4930435	4931096	Distal Intergenic	ENSG00000196581.6	159220
chr1	5338091	5338331	Distal Intergenic	ENSG00000231510.1	-187132	chr1	4931859	4932270	Distal Intergenic	ENSG00000196581.6	160644
chr1	5343214	5343799	Distal Intergenic	ENSG00000231510.1	-192255	chr1	4936747	4937099	Distal Intergenic	ENSG00000196581.6	165532
chr1	5345746	5346193	Distal Intergenic	ENSG00000231510.1	-194787	chr1	4937676	4937963	Distal Intergenic	ENSG00000196581.6	166461
chr1	5346822	5347327	Distal Intergenic	ENSG00000231510.1	-195863	chr1	4939556	4939826	Distal Intergenic	ENSG00000196581.6	168341
chr1	5349305	5349577	Distal Intergenic	ENSG00000231510.1	-198346	chr1	4955202	4955446	Distal Intergenic	ENSG00000196581.6	183987
chr1	5352485	5352725	Distal Intergenic	ENSG00000260972.1	-200313	chr1	4956940	4957155	Distal Intergenic	ENSG00000196581.6	185725
chr1	5356274	5356514	Distal Intergenic	ENSG00000260972.1	-196524	chr1	4961469	4961776	Distal Intergenic	ENSG00000231510.1	189183
chr1	5361352	5361739	Distal Intergenic	ENSG00000260972.1	-191299	chr1	4965462	4965677	Distal Intergenic	ENSG00000231510.1	185282
chr1	5364657	5364897	Distal Intergenic	ENSG00000260972.1	-188141	chr1	4969850	4970065	Distal Intergenic	ENSG00000231510.1	180894
chr1	5365812	5366215	Distal Intergenic	ENSG00000260972.1	-186823	chr1	4978873	4979388	Distal Intergenic	ENSG00000231510.1	171571
chr1	5366672	5367131	Distal Intergenic	ENSG00000260972.1	-185907	chr1	4984373	4984917	Distal Intergenic	ENSG00000231510.1	166042
chr1	5371198	5371961	Distal Intergenic	ENSG00000260972.1	-181077	chr1	4991393	4991928	Distal Intergenic	ENSG00000231510.1	159031
chr1	5390313	5390587	Distal Intergenic	ENSG00000260972.1	-162451	chr1	4994728	4995303	Distal Intergenic	ENSG00000231510.1	155656
chr1	5391864	5392508	Distal Intergenic	ENSG00000260972.1	-160530	chr1	5018075	5018356	Distal Intergenic	ENSG00000231510.1	132603
chr1	5400432	5401007	Distal Intergenic	ENSG00000260972.1	-152031	chr1	5020152	5020737	Distal Intergenic	ENSG00000231510.1	130222
chr1	5401371	5401995	Distal Intergenic	ENSG00000260972.1	-151043	chr1	5021128	5021485	Distal Intergenic	ENSG00000231510.1	129474
chr1	5403952	5404789	Distal Intergenic	ENSG00000260972.1	-148249	chr1	5027678	5028000	Distal Intergenic	ENSG00000231510.1	122959
chr1	5410286	5410526	Distal Intergenic	ENSG00000260972.1	-142512	chr1	5029828	5030043	Distal Intergenic	ENSG00000231510.1	120916
chr1	5411220	5411476	Distal Intergenic	ENSG00000260972.1	-141562	chr1	5036994	5037334	Distal Intergenic	ENSG00000231510.1	113625
chr1	5418705	5418993	Distal Intergenic	ENSG00000260972.1	-134045	chr1	5038138	5038364	Distal Intergenic	ENSG00000231510.1	112595
chr1	5425115	5425393	Distal Intergenic	ENSG00000260972.1	-127645	chr1	5040965	5041180	Distal Intergenic	ENSG00000231510.1	109779
chr1	5428936	5429176	Distal Intergenic	ENSG00000260972.1	-123862	chr1	5045301	5045607	Distal Intergenic	ENSG00000231510.1	105352
chr1	5430690	5431332	Distal Intergenic	ENSG00000260972.1	-121706	chr1	5046048	5046264	Distal Intergenic	ENSG00000231510.1	104695
chr1	5433999	5434239	Distal Intergenic	ENSG00000260972.1	-118799	chr1	5056840	5057185	Distal Intergenic	ENSG00000231510.1	93774
chr1	5437789	5438056	Distal Intergenic	ENSG00000260972.1	-114982	chr1	5062400	5062707	Distal Intergenic	ENSG00000231510.1	88252
chr1	5451575	5451994	Distal Intergenic	ENSG00000260972.1	-101044	chr1	5073805	5074064	Distal Intergenic	ENSG00000231510.1	76895
chr1	5461988	5462228	Distal Intergenic	ENSG00000260972.1	-90810	chr1	5075672	5075896	Distal Intergenic	ENSG00000231510.1	75063
chr1	5464354	5464829	Distal Intergenic	ENSG00000260972.1	-88209	chr1	5077393	5077671	Distal Intergenic	ENSG00000231510.1	73288
chr1	5467780	5468216	Distal Intergenic	ENSG00000260972.1	-84822	chr1	5098058	5098278	Distal Intergenic	ENSG00000231510.1	52681
chr1	5469756	5469996	Distal Intergenic	ENSG00000260972.1	-83042	chr1	5106249	5106464	Distal Intergenic	ENSG00000231510.1	44495
chr1	5470367	5470607	Distal Intergenic	ENSG00000260972.1	-82431	chr1	5110252	5110467	Distal Intergenic	ENSG00000231510.1	40492
chr1	5473224	5473652	Distal Intergenic	ENSG00000260972.1	-79386	chr1	5164809	5165024	Distal Intergenic	ENSG00000231510.1	-13850
chr1	5477550	5477825	Distal Intergenic	ENSG00000260972.1	-75213	chr1	5185480	5185695	Distal Intergenic	ENSG00000231510.1	-34521
chr1	5483437	5483699	Distal Intergenic	ENSG00000260972.1	-69339	chr1	5186568	5186837	Distal Intergenic	ENSG00000231510.1	-35609
chr1	5488075	5488911	Distal Intergenic	ENSG00000260972.1	-64127	chr1	5191270	5191777	Distal Intergenic	ENSG00000231510.1	-40311
chr1	5490615	5491228	Distal Intergenic	ENSG00000260972.1	-61810	chr1	5201058	5201880	Distal Intergenic	ENSG00000231510.1	-50099
chr1	5498178	5498473	Distal Intergenic	ENSG00000260972.1	-54565	chr1	5206785	5207281	Distal Intergenic	ENSG00000231510.1	-55826
chr1	5502070	5502393	Distal Intergenic	ENSG00000260972.1	-50645	chr1	5210566	5211043	Distal Intergenic	ENSG00000231510.1	-59607
chr1	5506922	5507243	Distal Intergenic	ENSG00000260972.1	-45795	chr1	5211322	5211552	Distal Intergenic	ENSG00000231510.1	-60363
chr1	5508182	5508598	Distal Intergenic	ENSG00000260972.1	-44440	chr1	5216478	5216728	Distal Intergenic	ENSG00000231510.1	-65519
chr1	5510258	5510851	Distal Intergenic	ENSG00000260972.1	-42187	chr1	5218067	5218472	Distal Intergenic	ENSG00000231510.1	-67108
chr1	5511019	5511341	Distal Intergenic	ENSG00000260972.1	-41697	chr1	5222507	5222731	Distal Intergenic	ENSG00000231510.1	-71548
chr1	5514274	5514558	Distal Intergenic	ENSG00000260972.1	-38480	chr1	5224331	5224546	Distal Intergenic	ENSG00000231510.1	-73372
chr1	5515216	5515771	Distal Intergenic	ENSG00000260972.1	-37267	chr1	5228119	5228451	Distal Intergenic	ENSG00000231510.1	-77160
chr1	5516271	5516715	Distal Intergenic	ENSG00000260972.1	-36323	chr1	5237007	5237322	Distal Intergenic	ENSG00000231510.1	-86048
chr1	5520695	5521055	Distal Intergenic	ENSG00000260972.1	-31983	chr1	5244629	5244844	Distal Intergenic	ENSG00000231510.1	-93670
chr1	5522191	5522959	Distal Intergenic	ENSG00000260972.1	-30079	chr1	5247621	5247922	Distal Intergenic	ENSG00000231510.1	-96662
chr1	5525992	5526269	Distal Intergenic	ENSG00000260972.1	-26769	chr1	5259236	5259541	Distal Intergenic	ENSG00000231510.1	-108277
chr1	5532966	5533517	Distal Intergenic	ENSG00000260972.1	-19521	chr1	5260279	5260560	Distal Intergenic	ENSG00000231510.1	-109320
chr1	5533672	5533912	Distal Intergenic	ENSG00000260972.1	-19126	chr1	5300586	5300922	Distal Intergenic	ENSG00000231510.1	-149627
chr1	5540762	5541113	Distal Intergenic	ENSG00000260972.1	-11925	chr1	5301834	5302332	Distal Intergenic	ENSG00000231510.1	-150875
chr1	5542088	5542578	Distal Intergenic	ENSG00000260972.1	-10460	chr1	5304796	5305463	Distal Intergenic	ENSG00000231510.1	-153837
chr1	5544062	5544544	Distal Intergenic	ENSG00000260972.1	-8494	chr1	5305682	5306005	Distal Intergenic	ENSG00000231510.1	-154723
chr1	5544792	5545032	Distal Intergenic	ENSG00000260972.1	-8006	chr1	5314124	5314461	Distal Intergenic	ENSG00000231510.1	-163165
chr1	5547074	5547368	Distal Intergenic	ENSG00000260972.1	-5670	chr1	5314985	5315386	Distal Intergenic	ENSG00000231510.1	-164026
chr1	5548446	5548867	Distal Intergenic	ENSG00000260972.1	-4171	chr1	5318041	5318256	Distal Intergenic	ENSG00000231510.1	-167082
chr1	5553625	5554242	Promoter	ENSG00000260972.1	587	chr1	5323007	5323584	Distal Intergenic	ENSG00000231510.1	-172048
chr1	5558212	5558770	Distal Intergenic	ENSG00000260972.1	5174	chr1	5323827	5324184	Distal Intergenic	ENSG00000231510.1	-172868
chr1	5561235	5561475	Distal Intergenic	ENSG00000260972.1	8197	chr1	5333729	5333944	Distal Intergenic	ENSG00000231510.1	-182770
chr1	5561816	5562660	Distal Intergenic	ENSG00000260972.1	8778	chr1	5334363	5335145	Distal Intergenic	ENSG00000231510.1	-183404
chr1	5564494	5564789	Distal Intergenic	ENSG00000260972.1	11456	chr1	5342801	5343317	Distal Intergenic	ENSG00000231510.1	-191842
chr1	5566684	5567037	Distal Intergenic	ENSG00000260972.1	13646	chr1	5347033	5347268	Distal Intergenic	ENSG00000231510.1	-196074
chr1	5567327	5567734	Distal Intergenic	ENSG00000260972.1	14289	chr1	5348460	5349192	Distal Intergenic	ENSG00000231510.1	-197501
chr1	5568537	5568835	Distal Intergenic	ENSG00000260972.1	15499	chr1	5351705	5352071	Distal Intergenic	ENSG00000231510.1	-200746
chr1	5569331	5569793	Distal Intergenic	ENSG00000260972.1	16293	chr1	5352433	5352736	Distal Intergenic	ENSG00000260972.1	-200302
chr1	5569949	5570292	Distal Intergenic	ENSG00000260972.1	16911	chr1	5353378	5353593	Distal Intergenic	ENSG00000260972.1	-199445
chr1	5573351	5573805	Distal Intergenic	ENSG00000260972.1	20313	chr1	5353779	5353994	Distal Intergenic	ENSG00000260972.1	-199044
chr1	5574283	5574538	Distal Intergenic	ENSG00000260972.1	21245	chr1	5356865	5357080	Distal Intergenic	ENSG00000260972.1	-195958
chr1	5580336	5580576	Distal Intergenic	ENSG00000260972.1	27298	chr1	5357336	5357655	Distal Intergenic	ENSG00000260972.1	-195383
chr1	5582023	5582395	Distal Intergenic	ENSG00000260972.1	28985	chr1	5360516	5360939	Distal Intergenic	ENSG00000260972.1	-192099
chr1	5586520	5586933	Distal Intergenic	ENSG00000260972.1	33482	chr1	5365534	5365789	Distal Intergenic	ENSG00000260972.1	-187249
chr1	5591546	5591856	Distal Intergenic	ENSG00000264341.1	-32275	chr1	5371682	5371897	Distal Intergenic	ENSG00000260972.1	-181141
chr1	5592348	5592726	Distal Intergenic	ENSG00000264341.1	-31405	chr1	5372344	5373031	Distal Intergenic	ENSG00000260972.1	-180007
chr1	5595316	5595665	Distal Intergenic	ENSG00000264341.1	-28466	chr1	5374858	5375140	Distal Intergenic	ENSG00000260972.1	-177898
chr1	5612703	5613154	Distal Intergenic	ENSG00000264341.1	-10977	chr1	5390908	5391192	Distal Intergenic	ENSG00000260972.1	-161846
chr1	5624237	5624695	Promoter	ENSG00000264341.1	106	chr1	5392259	5392779	Distal Intergenic	ENSG00000260972.1	-160259
chr1	5634703	5635065	Distal Intergenic	ENSG00000264341.1	10572	chr1	5396657	5396909	Distal Intergenic	ENSG00000260972.1	-156129
chr1	5635297	5635657	Distal Intergenic	ENSG00000264341.1	11166	chr1	5398453	5398675	Distal Intergenic	ENSG00000260972.1	-154363
chr1	5636774	5637056	Distal Intergenic	ENSG00000264341.1	12643	chr1	5400529	5400744	Distal Intergenic	ENSG00000260972.1	-152294
chr1	5637849	5638089	Distal Intergenic	ENSG00000264341.1	13718	chr1	5401229	5401532	Distal Intergenic	ENSG00000260972.1	-151506
chr1	5638529	5639921	Distal Intergenic	ENSG00000264341.1	14398	chr1	5403295	5403648	Distal Intergenic	ENSG00000260972.1	-149390
chr1	5641640	5642140	Distal Intergenic	ENSG00000264341.1	17509	chr1	5404024	5404239	Distal Intergenic	ENSG00000260972.1	-148799
chr1	5644607	5645012	Distal Intergenic	ENSG00000264341.1	20476	chr1	5407488	5407826	Distal Intergenic	ENSG00000260972.1	-145212
chr1	5646250	5646490	Distal Intergenic	ENSG00000264341.1	22119	chr1	5410136	5410411	Distal Intergenic	ENSG00000260972.1	-142627
chr1	5646729	5647219	Distal Intergenic	ENSG00000264341.1	22598	chr1	5420899	5422077	Distal Intergenic	ENSG00000260972.1	-130961
chr1	5653265	5653669	Intron (ENST00000413887.1/ENSG00000236948.1, intron 1 of 1)	ENSG00000264341.1	29134	chr1	5424395	5424805	Distal Intergenic	ENSG00000260972.1	-128233
chr1	5656852	5657092	Intron (ENST00000413887.1/ENSG00000236948.1, intron 1 of 1)	ENSG00000264341.1	32721	chr1	5426005	5426245	Distal Intergenic	ENSG00000260972.1	-126793
chr1	5659892	5660162	Intron (ENST00000413887.1/ENSG00000236948.1, intron 1 of 1)	ENSG00000264341.1	35761	chr1	5428434	5428755	Distal Intergenic	ENSG00000260972.1	-124283
chr1	5662447	5662688	Intron (ENST00000413887.1/ENSG00000236948.1, intron 1 of 1)	ENSG00000264341.1	38316	chr1	5432119	5432661	Distal Intergenic	ENSG00000260972.1	-120377
chr1	5674702	5675614	Intron (ENST00000413887.1/ENSG00000236948.1, intron 1 of 1)	ENSG00000264341.1	50571	chr1	5435496	5435961	Distal Intergenic	ENSG00000260972.1	-117077
chr1	5675925	5676308	Intron (ENST00000413887.1/ENSG00000236948.1, intron 1 of 1)	ENSG00000264341.1	51794	chr1	5436716	5437135	Distal Intergenic	ENSG00000260972.1	-115903
chr1	5676863	5677164	Intron (ENST00000413887.1/ENSG00000236948.1, intron 1 of 1)	ENSG00000236948.1	51191	chr1	5437504	5437719	Distal Intergenic	ENSG00000260972.1	-115319
chr1	5677433	5677786	Intron (ENST00000413887.1/ENSG00000236948.1, intron 1 of 1)	ENSG00000236948.1	50569	chr1	5440286	5441086	Distal Intergenic	ENSG00000260972.1	-111952
chr1	5677976	5678366	Intron (ENST00000413887.1/ENSG00000236948.1, intron 1 of 1)	ENSG00000236948.1	49989	chr1	5444586	5445005	Distal Intergenic	ENSG00000260972.1	-108033
chr1	5680708	5680948	Intron (ENST00000413887.1/ENSG00000236948.1, intron 1 of 1)	ENSG00000236948.1	47407	chr1	5451116	5452355	Distal Intergenic	ENSG00000260972.1	-100683
chr1	5695083	5695350	Intron (ENST00000413887.1/ENSG00000236948.1, intron 1 of 1)	ENSG00000236948.1	33005	chr1	5461244	5461651	Distal Intergenic	ENSG00000260972.1	-91387
chr1	5697837	5698468	Intron (ENST00000413887.1/ENSG00000236948.1, intron 1 of 1)	ENSG00000236948.1	29887	chr1	5461989	5462236	Distal Intergenic	ENSG00000260972.1	-90802
chr1	5709950	5710273	Intron (ENST00000413887.1/ENSG00000236948.1, intron 1 of 1)	ENSG00000236948.1	18082	chr1	5462495	5463955	Distal Intergenic	ENSG00000260972.1	-89083
chr1	5710877	5711395	Intron (ENST00000413887.1/ENSG00000236948.1, intron 1 of 1)	ENSG00000236948.1	16960	chr1	5464325	5464628	Distal Intergenic	ENSG00000260972.1	-88410
chr1	5711781	5712293	Intron (ENST00000413887.1/ENSG00000236948.1, intron 1 of 1)	ENSG00000236948.1	16062	chr1	5465607	5466022	Distal Intergenic	ENSG00000260972.1	-87016
chr1	5712475	5713450	Intron (ENST00000413887.1/ENSG00000236948.1, intron 1 of 1)	ENSG00000236948.1	14905	chr1	5468290	5468711	Distal Intergenic	ENSG00000260972.1	-84327
chr1	5718074	5718717	Intron (ENST00000413887.1/ENSG00000236948.1, intron 1 of 1)	ENSG00000236948.1	9638	chr1	5470930	5471176	Distal Intergenic	ENSG00000260972.1	-81862
chr1	5720022	5720987	Intron (ENST00000413887.1/ENSG00000236948.1, intron 1 of 1)	ENSG00000236948.1	7368	chr1	5471743	5472167	Distal Intergenic	ENSG00000260972.1	-80871
chr1	5721334	5721661	Intron (ENST00000413887.1/ENSG00000236948.1, intron 1 of 1)	ENSG00000236948.1	6694	chr1	5473366	5473628	Distal Intergenic	ENSG00000260972.1	-79410
chr1	5722169	5722409	Intron (ENST00000413887.1/ENSG00000236948.1, intron 1 of 1)	ENSG00000236948.1	5946	chr1	5474913	5475189	Distal Intergenic	ENSG00000260972.1	-77849
chr1	5722629	5722869	Intron (ENST00000413887.1/ENSG00000236948.1, intron 1 of 1)	ENSG00000236948.1	5486	chr1	5475889	5476394	Distal Intergenic	ENSG00000260972.1	-76644
chr1	5723268	5723603	Intron (ENST00000413887.1/ENSG00000236948.1, intron 1 of 1)	ENSG00000236948.1	4752	chr1	5477105	5477320	Distal Intergenic	ENSG00000260972.1	-75718
chr1	5724969	5725353	Intron (ENST00000413887.1/ENSG00000236948.1, intron 1 of 1)	ENSG00000236948.1	3002	chr1	5479541	5479773	Distal Intergenic	ENSG00000260972.1	-73265
chr1	5725863	5726137	Intron (ENST00000413887.1/ENSG00000236948.1, intron 1 of 1)	ENSG00000236948.1	2218	chr1	5482944	5483417	Distal Intergenic	ENSG00000260972.1	-69621
chr1	5727568	5728676	Promoter	ENSG00000236948.1	0	chr1	5487590	5488085	Distal Intergenic	ENSG00000260972.1	-64953
chr1	5728869	5729246	Promoter	ENSG00000236948.1	-514	chr1	5488429	5488752	Distal Intergenic	ENSG00000260972.1	-64286
chr1	5729664	5729904	Distal Intergenic	ENSG00000236948.1	-1309	chr1	5489682	5490089	Distal Intergenic	ENSG00000260972.1	-62949
chr1	5735588	5735828	Distal Intergenic	ENSG00000236948.1	-7233	chr1	5490253	5490611	Distal Intergenic	ENSG00000260972.1	-62427
chr1	5742944	5743266	Distal Intergenic	ENSG00000236948.1	-14589	chr1	5494912	5495205	Distal Intergenic	ENSG00000260972.1	-57833
chr1	5744000	5745314	Distal Intergenic	ENSG00000236948.1	-15645	chr1	5499960	5500530	Distal Intergenic	ENSG00000260972.1	-52508
chr1	5748238	5748570	Distal Intergenic	ENSG00000236948.1	-19883	chr1	5500783	5500998	Distal Intergenic	ENSG00000260972.1	-52040
chr1	5751046	5751386	Distal Intergenic	ENSG00000236948.1	-22691	chr1	5503666	5503881	Distal Intergenic	ENSG00000260972.1	-49157
chr1	5766288	5766701	Distal Intergenic	ENSG00000236948.1	-37933	chr1	5507993	5508344	Distal Intergenic	ENSG00000260972.1	-44694
chr1	5767164	5767689	Distal Intergenic	ENSG00000236948.1	-38809	chr1	5508633	5508985	Distal Intergenic	ENSG00000260972.1	-44053
chr1	5769042	5769282	Distal Intergenic	ENSG00000236948.1	-40687	chr1	5510220	5510477	Distal Intergenic	ENSG00000260972.1	-42561
chr1	5769851	5770367	Distal Intergenic	ENSG00000236948.1	-41496	chr1	5511520	5511877	Distal Intergenic	ENSG00000260972.1	-41161
chr1	5771747	5772501	Distal Intergenic	ENSG00000236948.1	-43392	chr1	5512896	5513142	Distal Intergenic	ENSG00000260972.1	-39896
chr1	5772803	5773597	Distal Intergenic	ENSG00000236948.1	-44448	chr1	5517949	5518239	Distal Intergenic	ENSG00000260972.1	-34799
chr1	5775838	5776211	Distal Intergenic	ENSG00000236948.1	-47483	chr1	5520252	5520736	Distal Intergenic	ENSG00000260972.1	-32302
chr1	5777765	5778665	Distal Intergenic	ENSG00000236948.1	-49410	chr1	5529565	5530129	Distal Intergenic	ENSG00000260972.1	-22909
chr1	5778907	5779151	Distal Intergenic	ENSG00000236948.1	-50552	chr1	5533134	5533473	Distal Intergenic	ENSG00000260972.1	-19565
chr1	5779638	5780048	Distal Intergenic	ENSG00000236948.1	-51283	chr1	5533989	5534407	Distal Intergenic	ENSG00000260972.1	-18631
chr1	5784821	5785167	Distal Intergenic	ENSG00000236948.1	-56466	chr1	5534818	5535060	Distal Intergenic	ENSG00000260972.1	-17978
chr1	5785924	5786900	Distal Intergenic	ENSG00000236948.1	-57569	chr1	5539306	5539650	Distal Intergenic	ENSG00000260972.1	-13388
chr1	5787745	5788881	Distal Intergenic	ENSG00000236948.1	-59390	chr1	5540260	5540516	Distal Intergenic	ENSG00000260972.1	-12522
chr1	5789050	5789770	Distal Intergenic	ENSG00000236948.1	-60695	chr1	5540833	5541189	Distal Intergenic	ENSG00000260972.1	-11849
chr1	5790644	5791080	Distal Intergenic	ENSG00000236948.1	-62289	chr1	5541637	5542357	Distal Intergenic	ENSG00000260972.1	-10681
chr1	5799546	5800263	Distal Intergenic	ENSG00000236948.1	-71191	chr1	5544367	5544584	Distal Intergenic	ENSG00000260972.1	-8454
chr1	5800924	5801176	Distal Intergenic	ENSG00000236948.1	-72569	chr1	5546394	5547259	Distal Intergenic	ENSG00000260972.1	-5779
chr1	5802496	5804033	Distal Intergenic	ENSG00000216045.2	71986	chr1	5553330	5554293	Promoter	ENSG00000260972.1	292
chr1	5806044	5806680	Distal Intergenic	ENSG00000216045.2	69339	chr1	5556264	5556720	Distal Intergenic	ENSG00000260972.1	3226
chr1	5807064	5807434	Distal Intergenic	ENSG00000216045.2	68585	chr1	5557450	5557972	Distal Intergenic	ENSG00000260972.1	4412
chr1	5808153	5808611	Distal Intergenic	ENSG00000216045.2	67408	chr1	5558541	5558756	Distal Intergenic	ENSG00000260972.1	5503
chr1	5809011	5809515	Distal Intergenic	ENSG00000216045.2	66504	chr1	5561676	5562025	Distal Intergenic	ENSG00000260972.1	8638
chr1	5809737	5811216	Distal Intergenic	ENSG00000216045.2	64803	chr1	5563216	5563618	Distal Intergenic	ENSG00000260972.1	10178
chr1	5814045	5814648	Distal Intergenic	ENSG00000216045.2	61371	chr1	5563895	5564498	Distal Intergenic	ENSG00000260972.1	10857
chr1	5817270	5817510	Distal Intergenic	ENSG00000216045.2	58509	chr1	5566472	5567261	Distal Intergenic	ENSG00000260972.1	13434
chr1	5817894	5818174	Distal Intergenic	ENSG00000216045.2	57845	chr1	5567461	5567849	Distal Intergenic	ENSG00000260972.1	14423
chr1	5818490	5819184	Distal Intergenic	ENSG00000216045.2	56835	chr1	5568842	5569122	Distal Intergenic	ENSG00000260972.1	15804
chr1	5825010	5825466	Distal Intergenic	ENSG00000216045.2	50553	chr1	5569536	5570119	Distal Intergenic	ENSG00000260972.1	16498
chr1	5826013	5826253	Distal Intergenic	ENSG00000216045.2	49766	chr1	5571555	5571828	Distal Intergenic	ENSG00000260972.1	18517
chr1	5826512	5826921	Distal Intergenic	ENSG00000216045.2	49098	chr1	5572186	5572677	Distal Intergenic	ENSG00000260972.1	19148
chr1	5827637	5829512	Distal Intergenic	ENSG00000216045.2	46507	chr1	5572829	5573456	Distal Intergenic	ENSG00000260972.1	19791
chr1	5830153	5830429	Distal Intergenic	ENSG00000216045.2	45590	chr1	5576872	5577188	Distal Intergenic	ENSG00000260972.1	23834
chr1	5833592	5834219	Distal Intergenic	ENSG00000216045.2	41800	chr1	5584628	5585002	Distal Intergenic	ENSG00000260972.1	31590
chr1	5834810	5835245	Distal Intergenic	ENSG00000216045.2	40774	chr1	5585973	5586347	Distal Intergenic	ENSG00000260972.1	32935
chr1	5836359	5837009	Distal Intergenic	ENSG00000216045.2	39010	chr1	5587866	5588445	Distal Intergenic	ENSG00000260972.1	34828
chr1	5845286	5845690	Distal Intergenic	ENSG00000216045.2	30329	chr1	5588826	5589176	Distal Intergenic	ENSG00000264341.1	-34955
chr1	5846879	5847137	Distal Intergenic	ENSG00000216045.2	28882	chr1	5593039	5593349	Distal Intergenic	ENSG00000264341.1	-30782
chr1	5852623	5854042	Distal Intergenic	ENSG00000216045.2	21977	chr1	5595458	5595962	Distal Intergenic	ENSG00000264341.1	-28169
chr1	5854275	5854894	Distal Intergenic	ENSG00000216045.2	21125	chr1	5612482	5612783	Distal Intergenic	ENSG00000264341.1	-11348
chr1	5855062	5855613	Distal Intergenic	ENSG00000216045.2	20406	chr1	5615080	5615343	Distal Intergenic	ENSG00000264341.1	-8788
chr1	5857710	5858071	Distal Intergenic	ENSG00000216045.2	17948	chr1	5624670	5624885	Promoter	ENSG00000264341.1	539
chr1	5867559	5867950	Distal Intergenic	ENSG00000216045.2	8069	chr1	5625261	5625660	Distal Intergenic	ENSG00000264341.1	1130
chr1	5869593	5870036	Distal Intergenic	ENSG00000216045.2	5983	chr1	5626875	5627092	Distal Intergenic	ENSG00000264341.1	2744
chr1	5871747	5872141	Distal Intergenic	ENSG00000216045.2	3878	chr1	5633713	5633982	Distal Intergenic	ENSG00000264341.1	9582
chr1	5872660	5873142	Distal Intergenic	ENSG00000216045.2	2877	chr1	5634360	5634969	Distal Intergenic	ENSG00000264341.1	10229
chr1	5874305	5874793	Distal Intergenic	ENSG00000216045.2	1226	chr1	5635794	5636515	Distal Intergenic	ENSG00000264341.1	11663
chr1	5878838	5879986	Distal Intergenic	ENSG00000216045.2	-2819	chr1	5638061	5638684	Distal Intergenic	ENSG00000264341.1	13930
chr1	5880842	5881285	Distal Intergenic	ENSG00000216045.2	-4823	chr1	5640782	5640997	Distal Intergenic	ENSG00000264341.1	16651
chr1	5881689	5881929	Distal Intergenic	ENSG00000216045.2	-5670	chr1	5643487	5643721	Distal Intergenic	ENSG00000264341.1	19356
chr1	5882176	5882759	Distal Intergenic	ENSG00000216045.2	-6157	chr1	5653719	5654034	Intron (ENST00000413887.1/ENSG00000236948.1, intron 1 of 1)	ENSG00000264341.1	29588
chr1	5888207	5888706	Distal Intergenic	ENSG00000216045.2	-12188	chr1	5655634	5655887	Intron (ENST00000413887.1/ENSG00000236948.1, intron 1 of 1)	ENSG00000264341.1	31503
chr1	5889396	5889732	Distal Intergenic	ENSG00000216045.2	-13377	chr1	5657261	5657476	Intron (ENST00000413887.1/ENSG00000236948.1, intron 1 of 1)	ENSG00000264341.1	33130
chr1	5890052	5890349	Distal Intergenic	ENSG00000216045.2	-14033	chr1	5658219	5658642	Intron (ENST00000413887.1/ENSG00000236948.1, intron 1 of 1)	ENSG00000264341.1	34088
chr1	5890623	5891516	Distal Intergenic	ENSG00000216045.2	-14604	chr1	5675176	5675432	Intron (ENST00000413887.1/ENSG00000236948.1, intron 1 of 1)	ENSG00000264341.1	51045
chr1	5891822	5892180	Distal Intergenic	ENSG00000216045.2	-15803	chr1	5676186	5676500	Intron (ENST00000413887.1/ENSG00000236948.1, intron 1 of 1)	ENSG00000236948.1	51855
chr1	5894055	5894456	Distal Intergenic	ENSG00000216045.2	-18036	chr1	5677091	5677444	Intron (ENST00000413887.1/ENSG00000236948.1, intron 1 of 1)	ENSG00000236948.1	50911
chr1	5896229	5896469	Distal Intergenic	ENSG00000216045.2	-20210	chr1	5677863	5678437	Intron (ENST00000413887.1/ENSG00000236948.1, intron 1 of 1)	ENSG00000236948.1	49918
chr1	5898812	5899090	Distal Intergenic	ENSG00000216045.2	-22793	chr1	5679078	5679314	Intron (ENST00000413887.1/ENSG00000236948.1, intron 1 of 1)	ENSG00000236948.1	49041
chr1	5901835	5902547	Distal Intergenic	ENSG00000264101.1	20254	chr1	5681633	5682205	Intron (ENST00000413887.1/ENSG00000236948.1, intron 1 of 1)	ENSG00000236948.1	46150
chr1	5902721	5903510	Distal Intergenic	ENSG00000264101.1	19291	chr1	5689170	5689385	Intron (ENST00000413887.1/ENSG00000236948.1, intron 1 of 1)	ENSG00000236948.1	38970
chr1	5904348	5904588	Distal Intergenic	ENSG00000264101.1	18213	chr1	5692202	5692562	Intron (ENST00000413887.1/ENSG00000236948.1, intron 1 of 1)	ENSG00000236948.1	35793
chr1	5904942	5905710	Distal Intergenic	ENSG00000264101.1	17091	chr1	5694624	5694839	Intron (ENST00000413887.1/ENSG00000236948.1, intron 1 of 1)	ENSG00000236948.1	33516
chr1	5906099	5906953	Distal Intergenic	ENSG00000264101.1	15848	chr1	5699682	5699961	Intron (ENST00000413887.1/ENSG00000236948.1, intron 1 of 1)	ENSG00000236948.1	28394
chr1	5907357	5907620	Distal Intergenic	ENSG00000264101.1	15181	chr1	5701093	5701361	Intron (ENST00000413887.1/ENSG00000236948.1, intron 1 of 1)	ENSG00000236948.1	26994
chr1	5908577	5908921	Distal Intergenic	ENSG00000264101.1	13880	chr1	5705922	5706832	Intron (ENST00000413887.1/ENSG00000236948.1, intron 1 of 1)	ENSG00000236948.1	21523
chr1	5909361	5909650	Distal Intergenic	ENSG00000264101.1	13151	chr1	5707115	5707597	Intron (ENST00000413887.1/ENSG00000236948.1, intron 1 of 1)	ENSG00000236948.1	20758
chr1	5912617	5913178	Distal Intergenic	ENSG00000264101.1	9623	chr1	5712567	5712941	Intron (ENST00000413887.1/ENSG00000236948.1, intron 1 of 1)	ENSG00000236948.1	15414
chr1	5913778	5914241	Distal Intergenic	ENSG00000264101.1	8560	chr1	5716399	5716858	Intron (ENST00000413887.1/ENSG00000236948.1, intron 1 of 1)	ENSG00000236948.1	11497
chr1	5915453	5916045	Distal Intergenic	ENSG00000264101.1	6756	chr1	5717217	5717523	Intron (ENST00000413887.1/ENSG00000236948.1, intron 1 of 1)	ENSG00000236948.1	10832
chr1	5916237	5917315	Distal Intergenic	ENSG00000264101.1	5486	chr1	5720237	5720737	Intron (ENST00000413887.1/ENSG00000236948.1, intron 1 of 1)	ENSG00000236948.1	7618
chr1	5918196	5918821	Distal Intergenic	ENSG00000264101.1	3980	chr1	5720948	5721665	Intron (ENST00000413887.1/ENSG00000236948.1, intron 1 of 1)	ENSG00000236948.1	6690
chr1	5919992	5920232	Distal Intergenic	ENSG00000264101.1	2569	chr1	5722005	5722389	Intron (ENST00000413887.1/ENSG00000236948.1, intron 1 of 1)	ENSG00000236948.1	5966
chr1	5921689	5922521	Promoter	ENSG00000264101.1	280	chr1	5722583	5723160	Intron (ENST00000413887.1/ENSG00000236948.1, intron 1 of 1)	ENSG00000236948.1	5195
chr1	5923268	5923764	Promoter	ENSG00000264101.1	-467	chr1	5723374	5723982	Intron (ENST00000413887.1/ENSG00000236948.1, intron 1 of 1)	ENSG00000236948.1	4373
chr1	5923914	5924215	3' UTR	ENSG00000264101.1	-1113	chr1	5724958	5725478	Intron (ENST00000413887.1/ENSG00000236948.1, intron 1 of 1)	ENSG00000236948.1	2877
chr1	5924890	5925941	3' UTR	ENSG00000131697.13	1771	chr1	5731169	5731634	Distal Intergenic	ENSG00000236948.1	-2814
chr1	5928119	5929089	Promoter	ENSG00000131697.13	0	chr1	5731900	5732180	Distal Intergenic	ENSG00000236948.1	-3545
chr1	5935268	5935642	Intron (ENST00000478423.2/ENSG00000131697.13, intron 16 of 25)	ENSG00000131697.13	-1367	chr1	5732329	5732728	Distal Intergenic	ENSG00000236948.1	-3974
chr1	5936364	5936845	Promoter	ENSG00000131697.13	681	chr1	5740260	5740839	Distal Intergenic	ENSG00000236948.1	-11905
chr1	5937064	5937856	Promoter	ENSG00000131697.13	0	chr1	5741647	5741953	Distal Intergenic	ENSG00000236948.1	-13292
chr1	5941046	5941655	Exon (ENST00000470763.1/ENSG00000131697.13, exon 1 of 2)	ENSG00000131697.13	1254	chr1	5744040	5744536	Distal Intergenic	ENSG00000236948.1	-15685
chr1	5942531	5943369	Promoter	ENSG00000131697.13	0	chr1	5747023	5747250	Distal Intergenic	ENSG00000236948.1	-18668
chr1	5944178	5944418	Intron (ENST00000478423.2/ENSG00000131697.13, intron 14 of 25)	ENSG00000131697.13	-1269	chr1	5747473	5747759	Distal Intergenic	ENSG00000236948.1	-19118
chr1	5946688	5946949	3' UTR	ENSG00000131697.13	-3779	chr1	5748704	5748967	Distal Intergenic	ENSG00000236948.1	-20349
chr1	5947494	5948351	3' UTR	ENSG00000131697.13	-4585	chr1	5752263	5752707	Distal Intergenic	ENSG00000236948.1	-23908
chr1	5949921	5950234	Intron (ENST00000478423.2/ENSG00000131697.13, intron 13 of 25)	ENSG00000266687.1	3750	chr1	5753018	5753459	Distal Intergenic	ENSG00000236948.1	-24663
chr1	5958487	5958958	Intron (ENST00000478423.2/ENSG00000131697.13, intron 12 of 25)	ENSG00000266687.1	-4503	chr1	5754344	5754837	Distal Intergenic	ENSG00000236948.1	-25989
chr1	5964820	5965089	Promoter	ENSG00000131697.13	295	chr1	5756144	5756794	Distal Intergenic	ENSG00000236948.1	-27789
chr1	5969568	5969906	Intron (ENST00000478423.2/ENSG00000131697.13, intron 9 of 25)	ENSG00000131697.13	-4184	chr1	5759236	5759473	Distal Intergenic	ENSG00000236948.1	-30881
chr1	5970493	5971062	Intron (ENST00000478423.2/ENSG00000131697.13, intron 9 of 25)	ENSG00000131697.13	-5109	chr1	5764726	5764964	Distal Intergenic	ENSG00000236948.1	-36371
chr1	5974774	5975641	Intron (ENST00000478423.2/ENSG00000131697.13, intron 9 of 25)	ENSG00000131697.13	-9390	chr1	5765783	5766283	Distal Intergenic	ENSG00000236948.1	-37428
chr1	5983774	5984014	Intron (ENST00000478423.2/ENSG00000131697.13, intron 9 of 25)	ENSG00000131697.13	-18390	chr1	5767034	5767442	Distal Intergenic	ENSG00000236948.1	-38679
chr1	5992344	5992908	Intron (ENST00000478423.2/ENSG00000131697.13, intron 8 of 25)	ENSG00000131697.13	-26960	chr1	5768031	5768595	Distal Intergenic	ENSG00000236948.1	-39676
chr1	5996333	5996573	Intron (ENST00000478423.2/ENSG00000131697.13, intron 7 of 25)	ENSG00000131697.13	-30949	chr1	5768862	5770073	Distal Intergenic	ENSG00000236948.1	-40507
chr1	5997990	5998402	Intron (ENST00000478423.2/ENSG00000131697.13, intron 7 of 25)	ENSG00000131697.13	-32606	chr1	5771030	5771654	Distal Intergenic	ENSG00000236948.1	-42675
chr1	6004849	6005164	Intron (ENST00000478423.2/ENSG00000131697.13, intron 7 of 25)	ENSG00000131697.13	-39465	chr1	5771960	5772406	Distal Intergenic	ENSG00000236948.1	-43605
chr1	6007624	6008307	3' UTR	ENSG00000131697.13	-42240	chr1	5773259	5773893	Distal Intergenic	ENSG00000236948.1	-44904
chr1	6012010	6012268	Intron (ENST00000478423.2/ENSG00000131697.13, intron 5 of 25)	ENSG00000069424.10	-39258	chr1	5776447	5776671	Distal Intergenic	ENSG00000236948.1	-48092
chr1	6019242	6019709	Intron (ENST00000478423.2/ENSG00000131697.13, intron 4 of 25)	ENSG00000069424.10	-31817	chr1	5780125	5780535	Distal Intergenic	ENSG00000236948.1	-51770
chr1	6029320	6029605	Intron (ENST00000478423.2/ENSG00000131697.13, intron 1 of 25)	ENSG00000069424.10	-21921	chr1	5780807	5781172	Distal Intergenic	ENSG00000236948.1	-52452
chr1	6029886	6030135	Intron (ENST00000478423.2/ENSG00000131697.13, intron 1 of 25)	ENSG00000069424.10	-21391	chr1	5784023	5784840	Distal Intergenic	ENSG00000236948.1	-55668
chr1	6036992	6037269	Intron (ENST00000478423.2/ENSG00000131697.13, intron 1 of 25)	ENSG00000069424.10	-14257	chr1	5785059	5785403	Distal Intergenic	ENSG00000236948.1	-56704
chr1	6040381	6040990	Intron (ENST00000478423.2/ENSG00000131697.13, intron 1 of 25)	ENSG00000069424.10	-10536	chr1	5785860	5786210	Distal Intergenic	ENSG00000236948.1	-57505
chr1	6045423	6045663	Intron (ENST00000478423.2/ENSG00000131697.13, intron 1 of 25)	ENSG00000069424.10	-5863	chr1	5787646	5787888	Distal Intergenic	ENSG00000236948.1	-59291
chr1	6055529	6055926	Exon (ENST00000493807.1/ENSG00000069424.10, exon 2 of 3)	ENSG00000069424.10	2758	chr1	5789318	5790127	Distal Intergenic	ENSG00000236948.1	-60963
chr1	6056391	6056990	Intron (ENST00000378111.1/ENSG00000069424.10, intron 1 of 7)	ENSG00000069424.10	3620	chr1	5790284	5790723	Distal Intergenic	ENSG00000236948.1	-61929
chr1	6058326	6059652	Intron (ENST00000378111.1/ENSG00000069424.10, intron 1 of 7)	ENSG00000069424.10	5555	chr1	5790968	5791258	Distal Intergenic	ENSG00000236948.1	-62613
chr1	6061620	6061874	Intron (ENST00000378111.1/ENSG00000069424.10, intron 1 of 7)	ENSG00000069424.10	8849	chr1	5799833	5800131	Distal Intergenic	ENSG00000236948.1	-71478
chr1	6062099	6062350	Intron (ENST00000378111.1/ENSG00000069424.10, intron 1 of 7)	ENSG00000069424.10	9328	chr1	5800521	5801067	Distal Intergenic	ENSG00000236948.1	-72166
chr1	6062640	6062880	Intron (ENST00000378111.1/ENSG00000069424.10, intron 1 of 7)	ENSG00000069424.10	9869	chr1	5801599	5801959	Distal Intergenic	ENSG00000236948.1	-73244
chr1	6063305	6063580	Intron (ENST00000378111.1/ENSG00000069424.10, intron 1 of 7)	ENSG00000069424.10	10534	chr1	5802551	5803144	Distal Intergenic	ENSG00000216045.2	72875
chr1	6068021	6068551	Intron (ENST00000378111.1/ENSG00000069424.10, intron 1 of 7)	ENSG00000069424.10	15250	chr1	5803308	5803696	Distal Intergenic	ENSG00000216045.2	72323
chr1	6068854	6069103	Intron (ENST00000378111.1/ENSG00000069424.10, intron 1 of 7)	ENSG00000069424.10	16083	chr1	5806132	5806508	Distal Intergenic	ENSG00000216045.2	69511
chr1	6070061	6070353	Intron (ENST00000378111.1/ENSG00000069424.10, intron 1 of 7)	ENSG00000069424.10	-16007	chr1	5807218	5807468	Distal Intergenic	ENSG00000216045.2	68551
chr1	6070731	6070971	Intron (ENST00000378111.1/ENSG00000069424.10, intron 1 of 7)	ENSG00000069424.10	-15389	chr1	5808006	5808777	Distal Intergenic	ENSG00000216045.2	67242
chr1	6072609	6072929	Intron (ENST00000378111.1/ENSG00000069424.10, intron 1 of 7)	ENSG00000069424.10	-13431	chr1	5810344	5810559	Distal Intergenic	ENSG00000216045.2	65460
chr1	6073296	6073845	Intron (ENST00000378111.1/ENSG00000069424.10, intron 1 of 7)	ENSG00000069424.10	-12515	chr1	5810759	5811481	Distal Intergenic	ENSG00000216045.2	64538
chr1	6076222	6076482	Intron (ENST00000378111.1/ENSG00000069424.10, intron 1 of 7)	ENSG00000069424.10	-9878	chr1	5812125	5812417	Distal Intergenic	ENSG00000216045.2	63602
chr1	6079984	6080534	Intron (ENST00000378111.1/ENSG00000069424.10, intron 1 of 7)	ENSG00000069424.10	-5826	chr1	5812580	5813256	Distal Intergenic	ENSG00000216045.2	62763
chr1	6084319	6084695	Intron (ENST00000378111.1/ENSG00000069424.10, intron 1 of 7)	ENSG00000069424.10	-1665	chr1	5813676	5813947	Distal Intergenic	ENSG00000216045.2	62072
chr1	6085747	6086213	Promoter	ENSG00000069424.10	-147	chr1	5814283	5814513	Distal Intergenic	ENSG00000216045.2	61506
chr1	6086525	6087151	Promoter	ENSG00000069424.10	145	chr1	5814845	5815472	Distal Intergenic	ENSG00000216045.2	60547
chr1	6095519	6095857	Promoter	ENSG00000069424.10	-120	chr1	5815797	5816149	Distal Intergenic	ENSG00000216045.2	59870
chr1	6098523	6098763	Intron (ENST00000378111.1/ENSG00000069424.10, intron 1 of 7)	ENSG00000069424.10	-1915	chr1	5816661	5819113	Distal Intergenic	ENSG00000216045.2	56906
chr1	6099238	6099485	Intron (ENST00000378111.1/ENSG00000069424.10, intron 1 of 7)	ENSG00000069424.10	-1193	chr1	5823871	5824577	Distal Intergenic	ENSG00000216045.2	51442
chr1	6100578	6100879	Promoter	ENSG00000069424.10	0	chr1	5827987	5828284	Distal Intergenic	ENSG00000216045.2	47735
chr1	6102402	6102673	Intron (ENST00000378111.1/ENSG00000069424.10, intron 3 of 7)	ENSG00000268332.1	-1003	chr1	5829611	5829943	Distal Intergenic	ENSG00000216045.2	46076
chr1	6103153	6103393	Intron (ENST00000378111.1/ENSG00000069424.10, intron 3 of 7)	ENSG00000268332.1	-1754	chr1	5831188	5831452	Distal Intergenic	ENSG00000216045.2	44567
chr1	6104856	6105254	Promoter	ENSG00000069424.10	-727	chr1	5838549	5839018	Distal Intergenic	ENSG00000216045.2	37001
chr1	6105678	6106140	Promoter	ENSG00000069424.10	0	chr1	5839172	5840197	Distal Intergenic	ENSG00000216045.2	35822
chr1	6107044	6108434	Promoter	ENSG00000069424.10	870	chr1	5841447	5841752	Distal Intergenic	ENSG00000216045.2	34267
chr1	6108680	6109823	Intron (ENST00000378111.1/ENSG00000069424.10, intron 3 of 7)	ENSG00000069424.10	2506	chr1	5846378	5846742	Distal Intergenic	ENSG00000216045.2	29277
chr1	6114400	6114862	Intron (ENST00000378111.1/ENSG00000069424.10, intron 3 of 7)	ENSG00000069424.10	8226	chr1	5847166	5847954	Distal Intergenic	ENSG00000216045.2	28065
chr1	6115747	6116029	Intron (ENST00000378111.1/ENSG00000069424.10, intron 3 of 7)	ENSG00000069424.10	9573	chr1	5853219	5853591	Distal Intergenic	ENSG00000216045.2	22428
chr1	6119430	6119770	Intron (ENST00000378111.1/ENSG00000069424.10, intron 3 of 7)	ENSG00000069424.10	13256	chr1	5853900	5854445	Distal Intergenic	ENSG00000216045.2	21574
chr1	6120580	6120917	Intron (ENST00000378111.1/ENSG00000069424.10, intron 3 of 7)	ENSG00000069424.10	14406	chr1	5855181	5855531	Distal Intergenic	ENSG00000216045.2	20488
chr1	6121201	6121580	Intron (ENST00000378111.1/ENSG00000069424.10, intron 3 of 7)	ENSG00000069424.10	15027	chr1	5856220	5856435	Distal Intergenic	ENSG00000216045.2	19584
chr1	6128360	6129465	Intron (ENST00000378111.1/ENSG00000069424.10, intron 3 of 7)	ENSG00000069424.10	-12856	chr1	5856756	5856978	Distal Intergenic	ENSG00000216045.2	19041
chr1	6130735	6131826	Intron (ENST00000378111.1/ENSG00000069424.10, intron 3 of 7)	ENSG00000069424.10	-10495	chr1	5857391	5857606	Distal Intergenic	ENSG00000216045.2	18413
chr1	6132235	6132820	5' UTR	ENSG00000069424.10	-9501	chr1	5858274	5858916	Distal Intergenic	ENSG00000216045.2	17103
chr1	6137111	6137462	Intron (ENST00000378111.1/ENSG00000069424.10, intron 5 of 7)	ENSG00000069424.10	-4859	chr1	5861941	5862232	Distal Intergenic	ENSG00000216045.2	13787
chr1	6137906	6138249	Intron (ENST00000378111.1/ENSG00000069424.10, intron 5 of 7)	ENSG00000069424.10	-4072	chr1	5876440	5876972	Promoter	ENSG00000216045.2	-421
chr1	6138984	6139365	Intron (ENST00000378111.1/ENSG00000069424.10, intron 5 of 7)	ENSG00000069424.10	-2956	chr1	5878647	5880544	Distal Intergenic	ENSG00000216045.2	-2628
chr1	6140031	6140569	Intron (ENST00000378111.1/ENSG00000069424.10, intron 5 of 7)	ENSG00000069424.10	-1752	chr1	5882208	5882423	Distal Intergenic	ENSG00000216045.2	-6189
chr1	6141437	6141691	Promoter	ENSG00000069424.10	-630	chr1	5882981	5883196	Distal Intergenic	ENSG00000216045.2	-6962
chr1	6141994	6142381	Promoter	ENSG00000069424.10	0	chr1	5888335	5888686	Distal Intergenic	ENSG00000216045.2	-12316
chr1	6144358	6144719	Intron (ENST00000378111.1/ENSG00000069424.10, intron 6 of 7)	ENSG00000069424.10	2037	chr1	5890351	5890618	Distal Intergenic	ENSG00000216045.2	-14332
chr1	6145820	6146270	3' UTR	ENSG00000069424.10	3499	chr1	5890962	5891268	Distal Intergenic	ENSG00000216045.2	-14943
chr1	6146588	6147119	Intron (ENST00000378111.1/ENSG00000069424.10, intron 7 of 7)	ENSG00000069424.10	4267	chr1	5892885	5893727	Distal Intergenic	ENSG00000216045.2	-16866
chr1	6147428	6147668	Exon (ENST00000378097.1/ENSG00000069424.10, exon 8 of 16)	ENSG00000069424.10	5107	chr1	5894315	5895423	Distal Intergenic	ENSG00000216045.2	-18296
chr1	6151624	6151924	Intron (ENST00000378111.1/ENSG00000069424.10, intron 7 of 7)	ENSG00000069424.10	-4392	chr1	5896118	5896356	Distal Intergenic	ENSG00000216045.2	-20099
chr1	6152658	6153182	Intron (ENST00000378111.1/ENSG00000069424.10, intron 7 of 7)	ENSG00000069424.10	-3134	chr1	5896580	5896922	Distal Intergenic	ENSG00000216045.2	-20561
chr1	6153969	6154479	Exon (ENST00000378097.1/ENSG00000069424.10, exon 11 of 16)	ENSG00000069424.10	-1837	chr1	5898437	5898652	Distal Intergenic	ENSG00000216045.2	-22418
chr1	6154655	6155203	Intron (ENST00000378111.1/ENSG00000069424.10, intron 7 of 7)	ENSG00000069424.10	-1113	chr1	5899066	5899306	Distal Intergenic	ENSG00000216045.2	-23047
chr1	6155479	6155888	Promoter	ENSG00000069424.10	-428	chr1	5899558	5899956	Distal Intergenic	ENSG00000264101.1	22845
chr1	6157983	6158820	3' UTR	ENSG00000069424.10	1667	chr1	5900195	5901442	Distal Intergenic	ENSG00000264101.1	21359
chr1	6158979	6159349	3' UTR	ENSG00000069424.10	2663	chr1	5901861	5902226	Distal Intergenic	ENSG00000264101.1	20575
chr1	6159806	6160673	3' UTR	ENSG00000069424.10	3490	chr1	5903516	5903772	Distal Intergenic	ENSG00000264101.1	19029
chr1	6163562	6164313	3' UTR	ENSG00000116254.13	2519	chr1	5904597	5906664	Distal Intergenic	ENSG00000264101.1	16137
chr1	6164475	6164821	3' UTR	ENSG00000116254.13	2011	chr1	5906886	5907555	Distal Intergenic	ENSG00000264101.1	15246
chr1	6165455	6165795	3' UTR	ENSG00000116254.13	1037	chr1	5909747	5909979	Distal Intergenic	ENSG00000264101.1	12822
chr1	6166234	6166990	Promoter	ENSG00000116254.13	0	chr1	5910347	5910732	Distal Intergenic	ENSG00000264101.1	12069
chr1	6168372	6168663	Intron (ENST00000262450.3/ENSG00000116254.13, intron 38 of 41)	ENSG00000116254.13	-1540	chr1	5910984	5912013	Distal Intergenic	ENSG00000264101.1	10788
chr1	6169557	6169875	3' UTR	ENSG00000116254.13	-2725	chr1	5912382	5912754	Distal Intergenic	ENSG00000264101.1	10047
chr1	6170158	6171086	3' UTR	ENSG00000116254.13	-3326	chr1	5913294	5913949	Distal Intergenic	ENSG00000264101.1	8852
chr1	6171482	6171921	3' UTR	ENSG00000116254.13	-4650	chr1	5914609	5916155	Distal Intergenic	ENSG00000264101.1	6646
chr1	6172719	6173160	3' UTR	ENSG00000116254.13	-5887	chr1	5916496	5916711	Distal Intergenic	ENSG00000264101.1	6090
chr1	6181575	6182092	3' UTR	ENSG00000116254.13	6510	chr1	5918211	5919446	Distal Intergenic	ENSG00000264101.1	3355
chr1	6182943	6183489	Intron (ENST00000262450.3/ENSG00000116254.13, intron 31 of 41)	ENSG00000116254.13	5113	chr1	5920822	5921620	Distal Intergenic	ENSG00000264101.1	1181
chr1	6184834	6185401	3' UTR	ENSG00000116254.13	3201	chr1	5922151	5922850	Promoter	ENSG00000264101.1	0
chr1	6185989	6186710	3' UTR	ENSG00000116254.13	1892	chr1	5923309	5923833	Promoter	ENSG00000264101.1	-508
chr1	6187546	6187786	Promoter	ENSG00000116254.13	816	chr1	5924083	5924347	3' UTR	ENSG00000264101.1	-1282
chr1	6188302	6188970	Promoter	ENSG00000116254.13	0	chr1	5925671	5926137	Exon (ENST00000460696.1/ENSG00000131697.13, exon 2 of 3)	ENSG00000131697.13	1575
chr1	6189482	6191577	Promoter	ENSG00000116254.13	222	chr1	5927700	5927985	Promoter	ENSG00000131697.13	0
chr1	6191959	6192199	Promoter	ENSG00000116254.13	-160	chr1	5933173	5933388	Promoter	ENSG00000131697.13	513
chr1	6194089	6195604	5' UTR	ENSG00000116254.13	-2290	chr1	5933569	5934746	Promoter	ENSG00000131697.13	0
chr1	6197062	6197619	Intron (ENST00000262450.3/ENSG00000116254.13, intron 15 of 41)	ENSG00000116254.13	-5263	chr1	5935400	5935615	Intron (ENST00000478423.2/ENSG00000131697.13, intron 16 of 25)	ENSG00000131697.13	-1499
chr1	6197960	6199153	Intron (ENST00000262450.3/ENSG00000116254.13, intron 15 of 41)	ENSG00000116254.13	5011	chr1	5936325	5937314	Promoter	ENSG00000131697.13	212
chr1	6202029	6202499	5' UTR	ENSG00000116254.13	1665	chr1	5937714	5937929	Promoter	ENSG00000131697.13	-188
chr1	6203476	6204287	Promoter	ENSG00000116254.13	0	chr1	5938356	5938772	Promoter	ENSG00000131697.13	-830
chr1	6206096	6206470	5' UTR	ENSG00000116254.13	-1932	chr1	5943266	5943680	Promoter	ENSG00000131697.13	-357
chr1	6206683	6206953	5' UTR	ENSG00000116254.13	-2519	chr1	5943981	5944196	Intron (ENST00000478423.2/ENSG00000131697.13, intron 14 of 25)	ENSG00000131697.13	-1072
chr1	6207807	6208088	Intron (ENST00000262450.3/ENSG00000116254.13, intron 9 of 41)	ENSG00000116254.13	-3643	chr1	5945304	5945587	Intron (ENST00000478423.2/ENSG00000131697.13, intron 14 of 25)	ENSG00000131697.13	-2395
chr1	6208974	6209486	5' UTR	ENSG00000116254.13	-4810	chr1	5947110	5947626	3' UTR	ENSG00000131697.13	-4201
chr1	6210964	6211744	5' UTR	ENSG00000116254.13	-6800	chr1	5947801	5948370	Intron (ENST00000478423.2/ENSG00000131697.13, intron 13 of 25)	ENSG00000131697.13	-4892
chr1	6212391	6213187	5' UTR	ENSG00000116254.13	-8227	chr1	5949525	5949828	Intron (ENST00000478423.2/ENSG00000131697.13, intron 13 of 25)	ENSG00000266687.1	4156
chr1	6213387	6213727	Intron (ENST00000262450.3/ENSG00000116254.13, intron 5 of 41)	ENSG00000116254.13	-9223	chr1	5950010	5950286	Intron (ENST00000478423.2/ENSG00000131697.13, intron 13 of 25)	ENSG00000266687.1	3698
chr1	6213886	6214504	Intron (ENST00000262450.3/ENSG00000116254.13, intron 5 of 41)	ENSG00000116254.13	-9722	chr1	5950956	5951328	3' UTR	ENSG00000266687.1	2656
chr1	6214656	6215026	5' UTR	ENSG00000116254.13	-10492	chr1	5952114	5952520	Intron (ENST00000478423.2/ENSG00000131697.13, intron 12 of 25)	ENSG00000266687.1	1464
chr1	6215292	6216360	5' UTR	ENSG00000116254.13	-11128	chr1	5953256	5953494	Promoter	ENSG00000266687.1	490
chr1	6216674	6217256	Intron (ENST00000262450.3/ENSG00000116254.13, intron 3 of 41)	ENSG00000116254.13	-12510	chr1	5957652	5957961	Intron (ENST00000478423.2/ENSG00000131697.13, intron 12 of 25)	ENSG00000266687.1	-3668
chr1	6219227	6220078	5' UTR	ENSG00000116254.13	-15063	chr1	5968682	5969460	Exon (ENST00000489180.2/ENSG00000131697.13, exon 12 of 33)	ENSG00000131697.13	-3298
chr1	6221899	6222139	Intron (ENST00000262450.3/ENSG00000116254.13, intron 2 of 41)	ENSG00000116254.13	-17735	chr1	5969876	5970384	Intron (ENST00000478423.2/ENSG00000131697.13, intron 9 of 25)	ENSG00000131697.13	-4492
chr1	6222788	6223092	Intron (ENST00000262450.3/ENSG00000116254.13, intron 2 of 41)	ENSG00000116254.13	16991	chr1	5970658	5970873	Intron (ENST00000478423.2/ENSG00000131697.13, intron 9 of 25)	ENSG00000131697.13	-5274
chr1	6225486	6227684	Intron (ENST00000262450.3/ENSG00000116254.13, intron 2 of 41)	ENSG00000116254.13	12399	chr1	5971167	5971572	Intron (ENST00000478423.2/ENSG00000131697.13, intron 9 of 25)	ENSG00000131697.13	-5783
chr1	6228386	6229690	Intron (ENST00000262450.3/ENSG00000116254.13, intron 1 of 41)	ENSG00000116254.13	10393	chr1	5973971	5974307	Intron (ENST00000478423.2/ENSG00000131697.13, intron 9 of 25)	ENSG00000131697.13	-8587
chr1	6230040	6230451	Intron (ENST00000262450.3/ENSG00000116254.13, intron 1 of 41)	ENSG00000116254.13	9632	chr1	5974586	5974983	Intron (ENST00000478423.2/ENSG00000131697.13, intron 9 of 25)	ENSG00000131697.13	-9202
chr1	6231241	6231503	Intron (ENST00000262450.3/ENSG00000116254.13, intron 1 of 41)	ENSG00000116254.13	8580	chr1	5993216	5993486	3' UTR	ENSG00000131697.13	-27832
chr1	6231691	6232215	Intron (ENST00000262450.3/ENSG00000116254.13, intron 1 of 41)	ENSG00000116254.13	7868	chr1	5993742	5993957	Intron (ENST00000478423.2/ENSG00000131697.13, intron 7 of 25)	ENSG00000131697.13	-28358
[truncated: 175,595 more rows]
