# Supplementary material for: Chemoproteomic profiling by a bioorthogonal probe reveals cell growth inhibition by histone H4 dopaminylation
Source: Research Square preprint supplement (doi:10.21203/rs.3.rs-4710338/v1), 2024-07-16
Supplement: Supplementary file 4 [file e5c94b1c911fa86a412049a0.xlsx]

## Sheet: rna-seq_peoteincoding.done
GeneName	GeneID	control-6h-1	control-6h-2	control-6h-3	DA(+)-6h-1	DA(+)-6h-2	DA(+)-6h-3	log2FC	P Value	adjusted P Value
HMOX1	ENSG00000100292.12	31.9892	38.1797	28.8777	425.963	470.419	391.697	3.67529	1.78e-15	4.77e-11
MAT2A	ENSG00000168906.8	54.4689	51.1279	56.2218	112.64	118.722	121.852	1.16314	2.6e-10	3.48e-06
GCLM	ENSG00000023909.5	5.9541	5.1835	4.3828	12.3464	12.1761	14.4062	1.21583	7.03e-08	0.000488389
HSPA5	ENSG00000044574.7	189.036	150.469	163.149	320.21	303.418	351.116	0.962381	9.12e-08	0.000488389
FTH1	ENSG00000167996.11	1758.92	1768.16	1894.14	2234.13	2325.29	2224.55	0.425757	8.26e-08	0.000488389
HERPUD1	ENSG00000051108.10	11.2612	9.4034	11.2171	23.4804	22.2027	23.6693	1.04537	1.24e-07	0.000551837
TXNRD1	ENSG00000198431.11	21.1835	18.5726	16.5723	34.8376	34.3886	43.7982	1.01176	4.95e-07	0.00177663
NTSR1	ENSG00000101188.4	15.9347	18.4086	19.9986	7.9038	10.0401	8.5454	-1.13474	7.87e-07	0.00191613
EEF1A1	ENSG00000156508.13	884.007	863.72	755.657	1053.98	1136.44	1198.03	0.415339	5.73e-07	0.00177663
MANF	ENSG00000145050.11	54.2079	50.1632	53.2212	85.651	81.9498	84.317	0.681181	1.24e-06	0.00276323
SLC7A11	ENSG00000151012.9	1.3233	1.2751	0.7772	2.6016	3.3681	4.108	1.3794	2.92e-06	0.00602475
NPTX1	ENSG00000171246.5	0.197	0.1539	0.166	0.7559	0.8308	0.8305	2.03985	6.62e-07	0.00177663
PBX1	ENSG00000185630.14	2.81	2.4358	2.3925	4.178	4.1495	5.0451	0.743962	9.96e-06	0.0190604
DNAJB9	ENSG00000128590.4	3.1338	2.9675	2.0969	5.613	8.1244	9.0359	1.23071	1.13e-05	0.0200922
XBP1	ENSG00000100219.12	37.2247	36.7163	36.7523	55.8878	58.7498	50.4556	0.570866	1.56e-05	0.0232247
RPS7	ENSG00000171863.8	93.5278	97.9116	91.2188	115.774	132.626	126.821	0.433701	1.31e-05	0.0219625
DNAJC3	ENSG00000102580.10	4.5107	3.9785	3.166	6.7665	7.664	8.9357	0.845834	1.75e-05	0.0239718
HTRA3	ENSG00000170801.5	0.0795	0.1988	0.0874	1.5692	1.1955	1.31	3.34473	6.63e-07	0.00177663
FLNC	ENSG00000128591.11	74.665	85.5874	90.4222	56.2517	65.8214	56.0942	-0.484522	1.51e-05	0.0232247
HYOU1	ENSG00000149428.14	48.5089	47.9247	52.8272	67.4081	66.2607	66.0277	0.433516	1.79e-05	0.0239718
CITED4	ENSG00000179862.5	24.0875	25.1449	25.4943	14.6634	17.7475	15.049	-0.845042	2.89e-05	0.0285685
TRIM47	ENSG00000132481.2	5.309	5.3982	5.603	3.5477	3.2002	3.2456	-0.939142	2.85e-05	0.0285685
PXN	ENSG00000089159.11	70.4899	76.6389	82.554	55.4356	58.1786	55.272	-0.437394	2.37e-05	0.0276283
FAM129B	ENSG00000136830.7	114.581	125.24	120.623	88.7635	94.3607	75.701	-0.47545	2.54e-05	0.0278456
MUC13	ENSG00000173702.3	0.8183	0.5194	0.5534	1.7391	1.8584	1.8331	1.34094	2.1e-05	0.0267448
RPS4X	ENSG00000198034.6	404.128	416.78	410.998	472.608	502.356	523.524	0.330559	2.22e-05	0.0270457
ATP2A2	ENSG00000174437.12	25.2836	22.23	24.3668	31.8981	31.2608	35.2245	0.456761	2.99e-05	0.0285685
ITGA3	ENSG00000005884.13	182.602	201.163	213.716	147.889	164.249	138.174	-0.316389	2.6e-05	0.0278456
PTRF	ENSG00000177469.12	239.368	249.971	263.286	194.845	205.231	179.062	-0.346685	4.3e-05	0.0397233
IL1R1	ENSG00000115594.7	33.4429	27.5239	24.7522	42.5317	41.6702	56.4344	0.734946	5.35e-05	0.0428851
DNAJB11	ENSG00000090520.6	9.0284	7.3996	7.5349	12.7427	11.8067	15.2418	0.653182	6.67e-05	0.0496697
FSCN1	ENSG00000075618.13	282.692	304.297	304.419	239.124	250.363	211.407	-0.334103	5.08e-05	0.0428851
ARHGAP22	ENSG00000128805.10	2.7317	2.7318	3.0446	1.8923	1.8853	1.7862	-0.832701	8.4e-05	0.0577259
KRT18	ENSG00000111057.6	121.055	148.145	153.133	91.2755	104.489	90.3595	-0.542675	6.95e-05	0.0503478
RPL4	ENSG00000174444.10	271.543	263.458	268.273	304.007	327.875	324.82	0.356137	5.24e-05	0.0428851
CREB3L2	ENSG00000182158.10	15.3704	12.8717	13.3293	19.0371	19.0753	21.9043	0.542346	8.12e-05	0.0572371
NGFR	ENSG00000064300.4	3.0332	2.8043	2.7503	1.9534	1.9134	1.7922	-0.849734	9.49e-05	0.0620005
HMGA1	ENSG00000137309.15	607.25	684.714	750.777	477.339	515.902	494.786	-0.370426	5.9e-05	0.0451536
WTIP	ENSG00000142279.8	3.5106	3.7562	3.3484	2.5114	2.5588	2.1402	-0.765358	0.00011262	0.0636088
ZNF783	ENSG00000204946.5	2.1239	1.7785	1.9157	1.42	1.2082	1.1678	-0.862388	0.000116347	0.0636088
RGS2	ENSG00000116741.6	17.0691	13.3934	9.4363	24.7055	22.6178	26.2822	0.771678	0.000130407	0.0659145
SLC35F3	ENSG00000183780.8	1.102	1.2271	0.8628	2.1597	2.5015	2.8843	1.0085	0.000125387	0.065783
PDIA4	ENSG00000155660.6	247.798	229.702	250.396	298.126	294.449	286.211	0.326457	8.88e-05	0.0594996
MAMLD1	ENSG00000013619.9	2.3048	1.9256	2.1755	1.4335	1.428	1.3897	-0.828737	0.000142231	0.0703802
WNT7B	ENSG00000188064.5	2.0913	2.6308	2.9204	1.1751	1.6742	1.2595	-1.13155	0.000144496	0.0703802
KCNN4	ENSG00000104783.7	5.8077	6.3364	5.9849	3.8146	4.6406	3.4704	-0.844022	0.000156192	0.0735933
HSPB7	ENSG00000173641.13	61.0549	62.177	64.1846	47.7978	46.526	37.435	-0.496003	0.000127691	0.065783
HSP90B1	ENSG00000166598.8	88.8608	73.3904	52.8312	109.962	116.546	144.258	0.840369	0.000113931	0.0636088
SLC6A15	ENSG00000072041.12	1.8313	1.5338	1.2549	2.724	2.6698	3.2914	0.699785	0.000162477	0.0735933
TGFB1I1	ENSG00000140682.14	16.4548	16.2538	17.8221	12.7803	12.4257	11.1081	-0.546873	0.000158913	0.0735933
SCG2	ENSG00000171951.4	418.5	392.406	322.167	488.081	533.368	628.133	0.653133	0.00010353	0.0636088
ARHGDIA	ENSG00000141522.7	466.476	472.76	519.711	392.518	394.178	359.26	-0.281172	0.000104402	0.0636088
DIO2	ENSG00000211448.7	0.3521	0.3632	0.2708	0.6498	0.935	0.9855	1.13818	0.000164829	0.0735933
C16orf74	ENSG00000154102.6	7.0226	8.8175	8.094	4.4471	5.8633	5.0832	-0.871671	0.000189828	0.081067
PLEC	ENSG00000178209.10	55.3831	59.0756	63.6209	47.7487	48.3578	43.1764	-0.336466	0.000115856	0.0636088
ZYX	ENSG00000159840.11	429.521	420.755	459.904	359.94	354.015	311.545	-0.2769	0.000112565	0.0636088
ZNF469	ENSG00000225614.2	2.5075	2.814	2.6608	4.4161	5.0101	4.0417	0.64023	0.000193698	0.081067
LRRC61	ENSG00000127399.10	3.5081	3.561	3.4483	2.3995	2.2624	2.309	-0.833713	0.000204595	0.081067
SLC26A2	ENSG00000155850.7	2.4292	2.0284	1.1015	3.6782	3.4871	5.0932	0.988602	0.000206581	0.081067
F12	ENSG00000131187.5	3.4015	3.8004	3.4409	2.2829	2.4394	2.1117	-0.881934	0.000208803	0.081067
PTGER1	ENSG00000160951.3	4.8318	5.8374	4.9692	3.5996	2.3949	3.0944	-1.02364	0.000207451	0.081067
GRAMD1B	ENSG00000023171.10	7.0501	6.2515	6.9848	10.1497	9.7163	9.7101	0.486172	0.000193981	0.081067
SEMA7A	ENSG00000138623.5	3.626	3.8788	4.209	2.6205	2.7762	2.2798	-0.841681	0.000222548	0.0816692
FLNA	ENSG00000196924.10	274.425	279.042	289.509	253.439	250.857	210.807	-0.212451	0.000105333	0.0636088
AHNAK2	ENSG00000185567.6	15.7237	15.2731	17.7807	11.7969	12.2131	12.1663	-0.39017	0.00021905	0.0815019
CDC42EP1	ENSG00000128283.6	29.5242	32.5913	34.2102	22.3737	24.4091	23.2348	-0.522058	0.000265751	0.0863882
S1PR3	ENSG00000213694.3	13.3687	10.4892	10.9612	17.4188	15.1145	17.4899	0.517397	0.000249019	0.085137
PLIN2	ENSG00000147872.5	23.6047	20.6909	20.6597	28.551	30.0636	29.1747	0.430133	0.000251149	0.085137
EHD2	ENSG00000024422.7	101.802	104.333	115.443	83.4458	84.5418	77.2333	-0.371578	0.00021318	0.0815019
CANX	ENSG00000127022.10	54.1846	41.5199	38.0708	62.6494	60.8509	82.7388	0.651826	0.00021865	0.0815019
RPS6	ENSG00000137154.8	327.111	331.668	327.144	387.28	422.921	450.707	0.369703	0.000181117	0.07954
JUP	ENSG00000173801.12	7.2186	7.2183	7.543	5.4785	5.4391	5.6012	-0.543291	0.000301677	0.095078
NQO1	ENSG00000181019.8	84.5897	90.6661	77.9712	107.201	114.584	102.298	0.394513	0.000230161	0.0822106
SAMD10	ENSG00000130590.9	7.6076	7.6043	8.4189	5.7834	5.4654	5.8354	-0.687299	0.000331952	0.101512
FOSL1	ENSG00000175592.4	98.6611	115.035	134.815	71.0135	81.9498	81.2121	-0.532919	0.000261577	0.0863882
PDE7B	ENSG00000171408.9	0.8867	0.7664	0.8134	1.5217	1.6441	1.8767	0.789123	0.000336059	0.101512
CALR	ENSG00000179218.9	667.909	633.547	723.912	767.75	762.625	740.308	0.261542	0.000163157	0.0735933
EPAS1	ENSG00000116016.9	47.427	42.9483	45.3679	54.1671	56.426	57.8515	0.337902	0.000235908	0.0831546
FN3K	ENSG00000167363.9	5.0583	4.3698	5.6958	3.5518	3.2227	3.7573	-0.729496	0.000345274	0.101512
2024-09-09	ENSG00000184640.13	60.6116	61.1732	63.6257	50.5198	50.8611	46.349	-0.285895	0.000229863	0.0822106
C1QL4	ENSG00000186897.3	11.9996	11.6111	13.2094	8.6227	9.239	9.2651	-0.63665	0.000379008	0.106321
G0S2	ENSG00000123689.5	61.9531	65.9531	54.7308	83.9158	98.2448	91.991	0.51144	0.000347553	0.101512
CARD10	ENSG00000100065.10	4.5087	4.0086	4.1758	2.7491	3.6219	2.5492	-0.744877	0.000388944	0.106321
SH3BGRL3	ENSG00000142669.9	317.682	316.422	371.942	264.993	260.165	264.773	-0.343078	0.000252592	0.085137
WNT5B	ENSG00000111186.8	3.3329	3.3743	3.8534	2.5668	2.4075	1.9668	-0.841601	0.000398778	0.107908
WNK4	ENSG00000126562.12	6.1059	6.9497	7.0517	4.0773	5.3803	4.8443	-0.666568	0.000384914	0.106321
TM9SF2	ENSG00000125304.8	25.5919	22.4028	21.0885	31.7349	30.6727	37.0257	0.502631	0.000348616	0.101512
CCDC85C	ENSG00000205476.4	8.5909	8.9956	9.0222	6.8252	6.8152	6.293	-0.526065	0.000386296	0.106321
DNAJA1	ENSG00000086061.11	49.0749	45.894	35.7328	57.1629	63.0852	70.271	0.548241	0.000342795	0.101512
MORF4L2	ENSG00000123562.12	46.3298	40.9063	37.4154	53.5893	56.1635	67.4796	0.518787	0.00035283	0.101634
ACTN1	ENSG00000072110.9	51.2569	50.5893	55.6784	42.369	43.8383	42.5922	-0.300848	0.000291422	0.0929392
SH3RF3	ENSG00000172985.8	1.525	1.2663	1.3673	1.0231	0.88	0.8951	-0.807199	0.000478852	0.121899
TRIM46	ENSG00000163462.13	6.007	5.8786	6.2378	4.5398	4.6917	4.525	-0.58822	0.000477104	0.121899
TEAD4	ENSG00000197905.4	13.4053	13.4594	12.6658	10.3433	10.1902	8.8946	-0.614248	0.000482336	0.121899
TNFAIP2	ENSG00000185215.4	3.5795	3.8979	4.3181	2.6387	2.9837	2.6975	-0.716653	0.000504055	0.123553
SLC39A9	ENSG00000029364.7	14.4016	13.1277	13.1619	17.3042	18.2814	20.0068	0.43183	0.000423769	0.113523
SORBS3	ENSG00000120896.9	19.9894	20.1074	21.3325	15.8189	16.2877	14.7763	-0.41892	0.000430362	0.114148
ARL6IP1	ENSG00000170540.10	14.3546	12.7837	9.6623	17.6213	18.9564	21.8956	0.585709	0.000476534	0.121899
MGLL	ENSG00000074416.9	0.9541	1.0711	1.3082	0.7438	0.6615	0.6373	-0.924168	0.000550109	0.127042
PPM1K	ENSG00000163644.10	0.3213	0.3194	0.2339	0.5856	0.5623	0.6788	0.840454	0.000546902	0.127042
CORO2B	ENSG00000103647.8	3.6769	4.1083	5.0929	2.5226	3.0696	2.9134	-0.810146	0.000580702	0.127512
TOR4A	ENSG00000198113.2	7.7882	8.188	6.5411	5.8166	5.7182	4.5786	-0.678521	0.000573588	0.127512
HSPB1	ENSG00000106211.8	503.236	518.86	540.382	425.578	442.141	394.499	-0.27167	0.000343236	0.101512
SERP1	ENSG00000120742.6	13.1035	12.3942	10.4269	15.9952	17.2178	18.1189	0.464881	0.00051564	0.123999
MTMR4	ENSG00000108389.5	13.4036	10.8048	12.6691	17.1511	16.2073	17.4786	0.448932	0.000496611	0.123553
RAD23A	ENSG00000179262.5	82.5798	84.3229	95.1089	66.2242	67.018	63.2058	-0.37762	0.000479902	0.121899
HSPA8	ENSG00000109971.9	504.344	477.552	498.593	587.969	632.29	710.161	0.472539	0.000267655	0.0863882
NR4A2	ENSG00000153234.9	0.6213	0.541	0.3779	1.4597	1.0788	1.132	1.06575	0.00062193	0.131188
TOX2	ENSG00000124191.13	8.9992	8.1948	9.5588	6.1385	7.3754	5.9943	-0.643007	0.00063472	0.13195
AKAP9	ENSG00000127914.12	0.5133	0.4473	0.2208	0.7566	0.7659	1.0706	0.958234	0.000685987	0.133166
CACNA2D2	ENSG00000007402.7	3.8726	3.2132	3.36	2.8178	2.5051	2.6798	-0.58976	0.000662052	0.132758
LRRN3	ENSG00000173114.8	2.1694	1.9915	1.348	3.1755	3.3134	4.2735	0.7274	0.000716979	0.134273
NIPAL4	ENSG00000172548.10	2.0082	1.9026	2.3217	1.3531	1.4704	1.2562	-0.843607	0.00072452	0.134273
ETV4	ENSG00000175832.8	19.7428	20.3653	20.716	15.8128	16.0109	14.4862	-0.464241	0.00061734	0.131188
PSMC2	ENSG00000161057.6	17.3911	16.7616	12.3576	22.1905	22.386	26.8799	0.552997	0.000611608	0.131188
ADAMTS9	ENSG00000163638.9	8.4296	7.19	6.192	9.8558	10.3436	10.9936	0.484299	0.000597763	0.130191
SHROOM1	ENSG00000164403.10	2.9687	3.5081	3.2064	2.6195	2.0249	2.2044	-0.746486	0.000739511	0.134273
KHK	ENSG00000138030.8	8.3279	8.6583	9.3093	7.2382	6.0495	5.4881	-0.691365	0.000706314	0.134273
SEL1L	ENSG00000071537.9	6.9709	5.1979	3.8301	8.2435	8.1345	10.0418	0.671971	0.000635394	0.13195
TMEM108	ENSG00000144868.9	2.8262	2.459	2.3134	2.0905	1.6831	2.071	-0.591572	0.00073618	0.134273
MCFD2	ENSG00000180398.7	25.5969	22.7341	19.2521	29.8591	29.868	36.9766	0.527773	0.000566709	0.127512
BOK	ENSG00000176720.3	5.1486	4.9522	4.7452	4.1517	3.3468	2.5949	-0.824983	0.000767773	0.13488
RICTOR	ENSG00000164327.8	0.2501	0.2223	0.157	0.4095	0.392	0.6318	0.956069	0.00076813	0.13488
PRRC1	ENSG00000164244.16	5.4482	4.1979	4.3754	6.8197	6.5137	8.2111	0.52491	0.000676399	0.132758
RPL7	ENSG00000147604.9	114.754	116.313	94.5958	129.936	144.726	156.015	0.418361	0.000507329	0.123553
UCP2	ENSG00000175567.4	11.0134	10.1227	11.6241	8.5716	8.5063	7.4858	-0.577897	0.000732914	0.134273
PKMYT1	ENSG00000127564.12	5.2371	5.5336	5.4475	4.0547	4.3943	3.8657	-0.591472	0.000752818	0.134586
CLDND1	ENSG00000080822.12	6.4285	5.5926	4.1346	8.0563	8.4902	9.7736	0.573554	0.000741814	0.134273
EIF3L	ENSG00000100129.13	71.7869	64.0159	62.6055	77.9866	83.0467	87.6557	0.357084	0.000543703	0.127042
LASP1	ENSG00000002834.13	65.2554	63.2497	71.1798	53.3798	55.2368	52.2443	-0.301274	0.000523047	0.123999
TOM1L2	ENSG00000175662.13	15.83	15.536	17.1367	13.1687	12.0446	11.9863	-0.404807	0.000664973	0.132758
CD200	ENSG00000091972.14	1.9865	1.8075	1.9566	3.63	3.1721	4.473	0.720285	0.000871129	0.14317
TFRC	ENSG00000072274.8	5.9375	5.0441	3.3788	7.1338	7.695	9.9999	0.693948	0.000753587	0.134586
FSTL1	ENSG00000163430.5	35.0053	29.0491	27.8148	38.9209	37.6136	41.054	0.404703	0.000578753	0.127512
NGEF	ENSG00000066248.10	1.5776	1.5937	1.7542	1.0295	1.2322	1.048	-0.813347	0.000895397	0.143478
RGS4	ENSG00000117152.9	46.1241	37.9147	33.2929	50.8288	51.7022	66.5698	0.558523	0.00061554	0.131188
SC5D	ENSG00000109929.5	1.8978	1.6756	1.3208	2.6442	2.8163	3.5971	0.639175	0.0008857	0.143478
STAMBPL1	ENSG00000138134.7	3.8632	3.3221	2.9142	5.0979	5.0316	6.392	0.539524	0.000843562	0.141239
RPL6	ENSG00000089009.11	147.725	132.371	129.845	155.484	169.405	180.183	0.36467	0.000520058	0.123999
ST8SIA5	ENSG00000101638.9	3.2725	3.3533	2.9501	2.4815	2.5828	1.8953	-0.72371	0.000936571	0.145296
ANKLE1	ENSG00000160117.10	2.6267	2.7289	2.8864	2.1497	1.647	1.966	-0.75466	0.000958904	0.145296
CCT5	ENSG00000150753.7	38.284	35.4163	31.7983	43.1637	44.6402	53.1318	0.43812	0.00064938	0.132758
PDIA6	ENSG00000143870.8	104.521	88.6651	94.0512	122.43	115.474	137.45	0.415889	0.000576352	0.127512
MTL5	ENSG00000132749.6	0.913	0.8207	1.0447	0.5543	0.6011	0.5694	-0.895142	0.000959869	0.145296
TMEM67	ENSG00000164953.11	0.659	0.5631	0.4439	1.0314	1.0399	1.1185	0.710822	0.000973712	0.145296
AGAP2-AS1	ENSG00000255737.2	19.5416	19.8363	19.7326	15.6988	15.7785	13.5658	-0.579019	0.000899741	0.143478
HGF	ENSG00000019991.11	29.7359	22.3759	20.135	32.5854	32.3975	44.1761	0.61771	0.000656105	0.132758
SH3GLB2	ENSG00000148341.13	12.7762	12.5852	13.0386	10.5446	9.9434	9.3365	-0.432527	0.000805243	0.138073
HSD3B7	ENSG00000099377.9	7.6108	8.1581	6.9147	6.3401	5.6629	4.7825	-0.673541	0.000977203	0.145296
JKAMP	ENSG00000050130.13	5.6053	5.0281	3.5356	6.9775	7.859	10.1838	0.647679	0.00093541	0.145296
VSTM2L	ENSG00000132821.7	12.2904	10.3696	10.7995	8.7869	9.0223	8.5182	-0.556788	0.000982314	0.145296
DDIT3	ENSG00000175197.6	3.9604	4.9046	3.6951	8.9709	8.7107	7.7435	0.773043	0.00105017	0.146581
MLEC	ENSG00000110917.3	48.7524	42.7723	47.2995	56.1855	54.4628	58.0021	0.317917	0.000677309	0.132758
LAT2	ENSG00000086730.12	0.7461	0.7178	0.6176	0.4781	0.3292	0.3708	-0.984949	0.000997611	0.145296
RNF208	ENSG00000212864.2	20.1949	22.441	22.1916	16.4792	17.1578	15.7295	-0.595083	0.00101407	0.145769
CEND1	ENSG00000184524.5	33.7902	35.8627	37.131	28.8824	27.486	25.6163	-0.485883	0.000921772	0.145255
GALNT15	ENSG00000131386.13	0.0775	0.1236	0.1193	0.3061	0.3543	0.3049	1.4718	0.00066494	0.132758
PODXL	ENSG00000128567.12	50.0254	48.9073	56.474	33.6688	38.9198	42.8262	-0.39744	0.000704491	0.134273
LRFN4	ENSG00000173621.8	23.0024	26.0627	24.5925	18.5817	20.0383	15.2676	-0.549762	0.000941458	0.145296
SSR1	ENSG00000124783.8	7.4569	5.8145	4.9446	8.303	8.9678	11.1633	0.592527	0.000899785	0.143478
ID2	ENSG00000115738.5	35.4496	28.3357	29.4572	43.2211	40.1518	48.7942	0.460514	0.000919174	0.145255
PHF19	ENSG00000119403.9	9.2301	8.7176	9.4556	7.083	7.5451	6.8093	-0.453329	0.000990389	0.145296
TOP2A	ENSG00000131747.10	6.6939	6.8471	3.5313	8.6284	9.9491	12.0926	0.770737	0.00100339	0.145296
GPR39	ENSG00000183840.5	2.5541	2.1974	3.0092	1.2558	1.9743	1.7351	-0.891895	0.00119768	0.151342
PNPLA8	ENSG00000135241.12	2.0235	1.6211	0.9201	2.72	3.1154	3.1559	0.786196	0.00118221	0.150811
SLC38A2	ENSG00000134294.9	32.7395	25.3724	18.2629	35.8071	36.3179	47.5936	0.698857	0.000825067	0.139891
CHST8	ENSG00000124302.8	4.8743	4.5027	4.5163	3.6207	3.8352	2.9428	-0.675617	0.0011958	0.151342
NXPE3	ENSG00000144815.10	4.116	3.6547	3.1957	5.2309	5.2195	6.1078	0.470874	0.00105582	0.146581
WDR66	ENSG00000158023.5	3.6707	3.5084	4.1056	5.1024	5.1068	5.5792	0.429055	0.000998378	0.145296
CLIC3	ENSG00000169583.12	2.3558	1.8934	1.6026	1.0659	0.92	0.9141	-1.11161	0.0010347	0.146581
CCT6A	ENSG00000146731.6	47.104	41.4799	31.8254	51.3468	55.7405	69.2868	0.577775	0.000862796	0.143158
LDHA	ENSG00000134333.9	101.08	89.4613	86.8608	108.778	109.513	126.348	0.367676	0.00067893	0.132758
NCOA4	ENSG00000138293.15	23.9783	20.1031	17.566	27.1402	28.1044	35.2067	0.529406	0.000973448	0.145296
BCLAF1	ENSG00000029363.11	5.2122	4.6963	2.7883	5.9948	7.6649	9.9525	0.797158	0.00107219	0.146581
CSRNP1	ENSG00000144655.10	4.5327	4.7123	4.4843	3.6934	3.5296	3.4786	-0.602749	0.00125629	0.154252
TMEM106B	ENSG00000106460.14	2.7835	2.4909	1.845	3.358	3.6664	4.8611	0.609059	0.00111347	0.146611
VIP	ENSG00000146469.8	24.9238	24.8809	20.8235	32.2305	35.3523	49.2299	0.601869	0.00111157	0.146611
MIA3	ENSG00000154305.12	3.4085	2.56	2.2739	3.9549	4.1654	5.1563	0.557634	0.00115842	0.150645
KRT8	ENSG00000170421.7	16.9191	19.4675	19.4906	14.2401	14.9488	13.6271	-0.442085	0.00104126	0.146581
TMEM50B	ENSG00000142188.12	4.5432	3.452	3.9488	6.3015	5.9995	7.878	0.561569	0.00123491	0.153464
HSPA13	ENSG00000155304.4	4.4076	4.3	2.168	5.9254	6.5653	8.5995	0.787884	0.00126198	0.154252
RPL14	ENSG00000188846.9	172.25	174.067	187.675	203.293	223.186	234.263	0.321906	0.0007835	0.136293
CSDC2	ENSG00000172346.10	4.8482	4.4951	4.5388	3.7267	3.7443	3.4113	-0.59407	0.00133722	0.154923
MYO7B	ENSG00000169994.14	0.105	0.1547	0.2142	0.0219	0.0059	0.0425	-3.03034	0.000254245	0.085137
SEC24D	ENSG00000150961.10	8.574	6.2538	6.4336	10.2258	9.412	11.6923	0.516052	0.00109434	0.146581
SLC39A6	ENSG00000141424.8	18.1693	15.9604	11.0074	21.3226	22.2808	28.6364	0.623912	0.00113786	0.148693
NKTR	ENSG00000114857.13	0.7636	0.6422	0.407	1.0179	0.9986	1.5045	0.745894	0.00137169	0.155432
TMED2	ENSG00000086598.6	43.0453	33.6453	33.9384	46.954	48.0154	61.9066	0.522011	0.000998478	0.145296
TMEM66	ENSG00000133872.9	34.1764	29.3808	25.873	40.134	39.0566	45.2763	0.447716	0.00109102	0.146581
SLC39A14	ENSG00000104635.9	16.351	13.7799	13.4531	18.6984	18.6957	20.4447	0.398579	0.00107898	0.146581
DNAJB4	ENSG00000162616.8	5.154	5.2472	3.0427	7.1304	7.3331	10.251	0.694184	0.00136609	0.155432
ABI3	ENSG00000108798.4	3.7095	3.9823	4.1944	2.5149	3.3592	2.457	-0.773379	0.00149972	0.158517
CNIH3	ENSG00000143786.3	8.0361	7.8259	7.9976	6.5211	6.4838	5.4573	-0.501416	0.00126676	0.154252
SETX	ENSG00000107290.9	2.6756	2.3354	1.4581	3.3786	3.3767	5.0362	0.727945	0.00131332	0.154923
SOSTDC1	ENSG00000171243.7	1.3526	1.2516	1.017	2.2049	2.1893	2.705	0.750497	0.00155826	0.158517
PTP4A3	ENSG00000184489.7	3.1713	3.0585	3.1612	2.2351	2.1761	2.2631	-0.722818	0.00157486	0.158517
EMILIN2	ENSG00000132205.6	1.5047	1.5905	1.4881	1.2898	1.0577	1.0323	-0.693071	0.00157036	0.158517
KARS	ENSG00000065427.10	43.4589	41.1277	40.8465	49.2157	51.9961	55.9629	0.352141	0.00108052	0.146581
C15orf52	ENSG00000188549.8	6.0364	6.6986	6.7491	4.5684	5.3967	5.1762	-0.480362	0.0013469	0.154923
RBPMS2	ENSG00000166831.4	11.1236	9.8408	14.2491	8.2223	7.4854	9.5072	-0.654801	0.00148446	0.158517
CENPE	ENSG00000138778.7	0.4148	0.3845	0.1383	0.6336	0.6934	1.0253	1.21925	0.00163967	0.158517
HMGB1	ENSG00000189403.10	26.2807	25.4422	19.9498	29.4759	33.1961	40.8873	0.540677	0.00111137	0.146611
VMP1	ENSG00000062716.6	13.0523	11.4747	10.6505	15.0568	15.5899	18.6344	0.449906	0.00122133	0.152888
C8orf58	ENSG00000241852.5	5.2544	4.9517	4.797	4.0588	4.1817	3.4129	-0.608551	0.00155008	0.158517
SESN3	ENSG00000149212.6	0.6154	0.7044	0.3405	0.9307	1.1039	1.4345	0.856151	0.00162538	0.158517
CDCP1	ENSG00000163814.3	6.189	6.4056	7.4772	4.494	5.3648	5.4996	-0.520271	0.00140141	0.157741
FKBP14	ENSG00000106080.6	6.5449	5.5789	3.9865	7.9186	8.1809	9.7932	0.561597	0.00140955	0.157994
RPL5	ENSG00000122406.8	136.866	136.1	122.233	153.479	166.288	189.721	0.389083	0.00096016	0.145296
PRDX3	ENSG00000165672.5	20.1708	18.5871	14.9041	22.4961	27.5549	28.3383	0.480039	0.00134746	0.154923
DMPK	ENSG00000104936.13	19.418	19.1951	17.9315	15.7635	14.9887	12.5264	-0.440041	0.00130271	0.154923
GPR153	ENSG00000158292.6	11.0085	11.1512	11.7889	8.7359	9.3982	8.8126	-0.458664	0.00147136	0.158517
PLK2	ENSG00000145632.10	13.6616	12.0655	10.884	16.4255	16.0487	19.6612	0.443664	0.00137509	0.155432
STX1A	ENSG00000106089.7	10.7857	9.9232	12.4021	8.9636	8.2519	8.1321	-0.520829	0.00151205	0.158517
ECHDC3	ENSG00000134463.10	3.7869	4.0607	4.0506	3.0476	2.6667	3.1257	-0.666849	0.00176745	0.159438
PRKAR1B	ENSG00000188191.10	33.938	35.7641	35.7535	27.4957	29.1631	25.4049	-0.358735	0.00125339	0.154252
TP73	ENSG00000078900.10	1.666	1.3791	1.5733	1.2486	1.075	1.169	-0.638701	0.0017941	0.159667
TENC1	ENSG00000111077.13	9.8706	9.8365	10.0995	7.8943	8.2573	7.4622	-0.400697	0.00142813	0.158517
ZNF747	ENSG00000169955.6	6.0632	6.4974	6.044	4.7245	5.3783	3.9586	-0.616373	0.00168575	0.158517
ZNF747	ENSG00000261459.1	16.2687	17.4335	16.2172	12.6767	14.431	10.6217	-0.616373	0.00168575	0.158517
LMNA	ENSG00000160789.15	218.633	229.915	219.989	184.507	188.279	148.346	-0.281498	0.00080919	0.138073
EIF4A2	ENSG00000156976.10	16.764	13.7202	12.1443	18.7416	19.0684	24.7432	0.530224	0.00136685	0.155432
KIAA1614	ENSG00000135835.6	0.6087	0.6072	0.555	0.4591	0.4248	0.3854	-0.713454	0.001982	0.161595
GCC2	ENSG00000135968.15	0.5203	0.4505	0.2658	0.7048	0.7337	0.9826	0.766284	0.00195093	0.161595
ANTXR1	ENSG00000169604.15	37.6299	31.6786	31.6657	40.1658	40.5705	48.4419	0.38322	0.0011752	0.150811
DDX6	ENSG00000110367.7	8.0456	7.2684	5.7049	8.9382	10.1667	11.7408	0.509126	0.00148434	0.158517
MAGT1	ENSG00000102158.15	11.062	8.3691	7.6993	11.9296	13.6068	16.0387	0.524165	0.00158109	0.158517
SLC2A4RG	ENSG00000125520.9	95.8314	94.4354	92.9997	76.4888	78.0118	66.7077	-0.336845	0.00131159	0.154923
FAM127B	ENSG00000203950.6	70.7681	72.554	82.2764	58.9734	58.4524	59.3517	-0.39638	0.00149754	0.158517
MYO1C	ENSG00000197879.10	68.1084	69.7441	71.9767	59.9865	59.7485	50.1242	-0.302643	0.00107842	0.146581
RIN3	ENSG00000100599.11	9.1999	9.1443	10.0204	7.6136	7.6606	7.0252	-0.409295	0.00154341	0.158517
TIMM17A	ENSG00000134375.6	12.2905	11.7356	8.0813	16.0161	16.1457	16.7115	0.502897	0.00164663	0.158517
GOLGA4	ENSG00000144674.12	1.334	1.0776	0.5593	1.6695	1.76	2.5564	0.838388	0.00190105	0.160654
PHLDA2	ENSG00000181649.5	46.317	56.3929	62.6455	36.1276	44.0046	40.264	-0.558593	0.00166834	0.158517
S100A16	ENSG00000188643.6	227.619	249.964	246.711	191.684	205.982	173.2	-0.323114	0.00118151	0.150811
TMEM173	ENSG00000184584.8	11.066	12.0804	11.3436	9.6634	8.8931	6.8528	-0.596402	0.00172784	0.158517
ADAM17	ENSG00000151694.8	9.2105	7.1378	7.6239	11.093	10.7248	13.4763	0.465429	0.0016471	0.158517
TMCO1	ENSG00000143183.12	27.7043	28.4674	25.8298	33.7562	36.64	40.9807	0.399314	0.00151459	0.158517
ETNK2	ENSG00000143845.10	6.6758	6.3749	5.9102	5.2428	5.1142	5.2536	-0.457942	0.001826	0.159667
C1orf233	ENSG00000228594.1	26.0909	26.0476	29.784	21.3152	22.5297	20.3718	-0.454463	0.00170215	0.158517
CCDC159	ENSG00000183401.7	1.6028	1.4826	1.321	1.128	1.0658	1.059	-0.669902	0.00215794	0.162377
FLOT2	ENSG00000132589.11	47.1658	48.7897	50.3068	38.5485	40.1257	35.1261	-0.347807	0.00145951	0.158517
MIS12	ENSG00000167842.11	3.6944	3.2941	2.3439	4.6925	5.4879	6.5197	0.602327	0.00202144	0.161595
VAV2	ENSG00000160293.12	10.2557	9.9648	11.0824	8.4161	8.0041	8.6938	-0.413019	0.00171034	0.158517
PARVB	ENSG00000188677.10	7.1573	7.4767	7.8847	6.0499	6.2045	5.2076	-0.481367	0.00173562	0.158688
F8A1	ENSG00000197932.3	18.9661	18.6812	20.2157	16.1699	15.1265	14.7679	-0.491564	0.00187746	0.159667
REC8	ENSG00000100918.8	18.288	18.4048	21.9723	15.3394	15.5053	13.7986	-0.455195	0.0016856	0.158517
DDN	ENSG00000181418.7	1.2679	1.3209	1.3417	0.798	1.0178	0.8485	-0.781183	0.00222015	0.162377
SGK223	ENSG00000182319.5	10.0945	10.916	11.9032	8.4435	8.9277	8.3001	-0.463108	0.00178411	0.159667
TRIP6	ENSG00000087077.7	6.3459	6.0386	6.0412	5.1148	5.1343	4.1069	-0.602866	0.00205819	0.161595
MAPKAPK3	ENSG00000114738.6	23.7441	26.0076	27.4636	19.2376	21.598	18.9243	-0.41089	0.00163537	0.158517
ELFN2	ENSG00000166897.10	2.6211	3.0827	3.3649	2.099	2.4778	2.1786	-0.604587	0.00197371	0.161595
TTLL12	ENSG00000100304.12	16.988	17.9377	19.8082	13.8854	15.217	12.6511	-0.453009	0.00169234	0.158517
RPL7L1	ENSG00000146223.10	18.5598	17.3814	17.3353	21.2136	22.0544	27.0405	0.408176	0.00149711	0.158517
NBEAL1	ENSG00000144426.14	0.1398	0.1613	0.0975	0.2858	0.2204	0.3714	0.921697	0.00226895	0.162377
TMEM41B	ENSG00000166471.6	3.3343	3.1731	2.2531	5.0633	4.3378	5.6596	0.558897	0.00207105	0.161595
ZFR	ENSG00000056097.11	10.718	9.5515	7.6406	12.2341	12.9365	17.0324	0.541722	0.00170725	0.158517
F3	ENSG00000117525.9	1.9289	1.3924	1.1439	2.9037	2.4033	3.1403	0.70556	0.00230864	0.16354
GDI2	ENSG00000057608.12	41.7754	36.5511	32.5825	45.5862	47.1654	58.517	0.463629	0.00150763	0.158517
SPIRE2	ENSG00000204991.6	3.1678	2.6753	2.8442	2.5473	2.2371	2.1468	-0.539283	0.00206442	0.161595
TUT1	ENSG00000149016.11	3.1699	3.1745	2.9265	2.3051	2.8043	2.0971	-0.629993	0.00221052	0.162377
ZYG11B	ENSG00000162378.8	2.857	2.5331	1.8083	3.6906	3.6863	4.2272	0.514811	0.00202611	0.161595
MAPK11	ENSG00000185386.10	16.0094	15.6201	15.9175	13.76	12.4523	10.4939	-0.508108	0.00187504	0.159667
EPHA2	ENSG00000142627.9	45.3989	49.9805	50.7364	37.5686	41.0997	34.1027	-0.358922	0.00151755	0.158517
CREB3L1	ENSG00000157613.6	32.0776	33.1741	38.9021	26.3738	28.0931	25.7642	-0.379293	0.00162013	0.158517
KLHDC4	ENSG00000104731.9	2.6045	2.1684	2.5413	2.0004	1.9131	1.978	-0.512847	0.00208676	0.161595
UNC13D	ENSG00000092929.7	3.8324	3.8969	4.3236	3.4921	2.9799	2.8482	-0.548	0.00202314	0.161595
EIF2AK3	ENSG00000172071.7	1.9196	1.3974	1.3973	2.4598	2.5715	3.4176	0.593633	0.00225668	0.162377
ADAM19	ENSG00000135074.11	51.5878	53.772	56.5252	41.7954	45.8856	43.1687	-0.281061	0.00133858	0.154923
OSMR	ENSG00000145623.8	18.6014	16.9814	16.7528	20.6632	22.0083	24.1132	0.364723	0.00160656	0.158517
CTSL	ENSG00000135047.10	31.3446	30.0007	31.0299	37.4247	42.2796	45.0191	0.385859	0.00176763	0.159438
OSBP2	ENSG00000184792.11	1.3552	1.307	1.5318	1.033	0.998	1.1043	-0.652604	0.0023596	0.164254
PPP1R13L	ENSG00000104881.10	5.0468	5.339	5.9494	4.3153	4.4063	3.5512	-0.601388	0.00212694	0.161871
PAQR7	ENSG00000182749.5	8.1698	9.6506	8.1707	6.63	7.4444	6.2712	-0.543907	0.00211125	0.161595
ABR	ENSG00000159842.10	18.5312	17.8128	19.686	15.0133	15.1005	14.0748	-0.307758	0.00155083	0.158517
ITPR3	ENSG00000096433.6	4.3255	4.5366	5.1402	3.5641	3.6152	3.8532	-0.459139	0.00198701	0.161595
SF3A2	ENSG00000104897.5	37.2934	38.6322	40.9188	31.81	32.1964	27.5653	-0.38712	0.00172261	0.158517
DDX5	ENSG00000108654.7	40.0437	32.3877	29.1744	43.6129	41.5172	58.0149	0.512805	0.00144325	0.158517
PARP12	ENSG00000059378.8	3.7535	3.3093	4.0015	3.048	2.9043	2.6943	-0.559455	0.00218688	0.162377
EHBP1L1	ENSG00000173442.7	18.5175	19.2647	19.5837	16.0056	15.3268	13.8836	-0.367232	0.00172563	0.158517
RAB27B	ENSG00000041353.5	7.4026	6.9688	3.6507	8.7263	9.8798	12.3304	0.723955	0.00191498	0.160816
AFF4	ENSG00000072364.8	6.5725	5.6439	4.3967	7.2785	7.8553	10.1243	0.55238	0.00183462	0.159667
PCNX	ENSG00000100731.11	2.0091	1.6616	1.4988	2.4048	2.4556	3.0785	0.478463	0.00205291	0.161595
CEP44	ENSG00000164118.8	1.1478	0.7985	0.7053	1.705	1.3737	1.784	0.64695	0.00243622	0.165863
FAM8A1	ENSG00000137414.5	3.9994	3.1853	2.2026	4.9833	5.0163	5.9711	0.578219	0.00224543	0.162377
PDE4B	ENSG00000184588.13	0.4228	0.4059	0.2966	0.6254	0.722	0.812	0.718606	0.00253911	0.165863
NOC4L	ENSG00000184967.2	21.3105	22.6324	20.8128	17.3802	18.0626	17.0336	-0.438674	0.00207186	0.161595
NUS1	ENSG00000153989.7	7.9159	5.8602	5.368	8.8645	9.3401	12.0548	0.53115	0.00208715	0.161595
NGF	ENSG00000134259.3	8.7016	10.2481	8.6381	5.9915	7.8306	7.0593	-0.65308	0.0025139	0.165863
LIMD2	ENSG00000136490.4	20.4712	22.9955	20.9663	17.2373	17.9087	14.0287	-0.452228	0.00187006	0.159667
PDLIM1	ENSG00000107438.4	67.3262	66.7777	76.4452	56.4656	54.8799	53.1093	-0.342966	0.00174707	0.159085
PPP2R1B	ENSG00000137713.11	4.9187	3.9119	3.325	6.0677	5.6858	6.982	0.483172	0.00215926	0.162377
C6orf120	ENSG00000185127.5	10.6627	8.81	6.7865	11.8987	13.061	16.2587	0.53752	0.00207672	0.161595
CCDC106	ENSG00000173581.3	20.8772	19.5907	20.0134	16.3876	17.3402	14.1251	-0.459408	0.002069	0.161595
C6orf62	ENSG00000112308.8	23.6246	19.0869	17.4551	26.3333	26.1435	31.0501	0.444731	0.00186862	0.159667
MYBL2	ENSG00000101057.11	51.9553	60.1638	63.7101	44.656	47.5262	41.8253	-0.383954	0.00177972	0.159667
S100A10	ENSG00000197747.4	175.024	162.506	190.322	146.827	137.213	129.907	-0.326186	0.00161598	0.158517
2024-09-02	ENSG00000168385.13	30.4294	24.7174	21.6846	32.2633	32.0927	40.3117	0.479898	0.00164579	0.158517
OAT	ENSG00000065154.7	13.7442	13.0456	10.9348	17.0486	16.985	21.2907	0.448238	0.00209538	0.161595
RPL24	ENSG00000114391.8	113.987	126.252	120.802	133.554	153.384	151.499	0.303573	0.00151881	0.158517
RAP2A	ENSG00000125249.6	3.3503	3.0155	1.8408	4.2797	4.4713	5.3665	0.597413	0.00240108	0.165561
PIP5KL1	ENSG00000167103.7	1.8443	1.544	1.2449	0.8521	1.389	0.7841	-0.871062	0.00274866	0.165863
PTGIR	ENSG00000160013.4	1.7997	1.8504	1.8004	1.2792	1.4832	1.2532	-0.68542	0.00271702	0.165863
KLHL24	ENSG00000114796.11	0.3562	0.3292	0.1621	0.5355	0.5663	0.6922	0.93433	0.00275368	0.165863
FBXO8	ENSG00000164117.8	7.5025	7.4606	6.4027	10.2004	10.7898	12.5187	0.456359	0.00234883	0.164254
SAR1A	ENSG00000079332.10	9.4213	8.7025	7.2819	11.1807	11.0973	13.6128	0.434987	0.00204504	0.161595
SERPINE1	ENSG00000106366.7	1732.92	1850.93	2009.39	1407.44	1626.05	1478.21	-0.25075	0.000770341	0.13488
JAK2	ENSG00000096968.8	0.515	0.3605	0.271	0.7793	0.6628	0.8634	0.837501	0.00278334	0.165863
NUDT17	ENSG00000186364.7	6.3217	5.0558	7.0343	4.8633	4.4189	3.2466	-0.798154	0.00268472	0.165863
MLLT11	ENSG00000213190.2	32.4799	28.5798	30.1326	36.5463	38.0143	39.5758	0.335933	0.00184089	0.159667
C12orf23	ENSG00000151135.5	6.0924	5.2018	4.0574	7.3475	7.4404	9.9385	0.529793	0.0023137	0.16354
CTNNB1	ENSG00000168036.12	31.4205	26.9375	25.3681	33.3749	34.3601	38.9965	0.377626	0.00172226	0.158517
LIF	ENSG00000128342.4	4.0586	5.5628	4.1431	2.9544	4.1443	2.7226	-0.734817	0.00253867	0.165863
VPS35	ENSG00000069329.11	5.9028	5.5432	4.0192	6.8091	7.3874	9.3577	0.529933	0.00210385	0.161595
EDEM1	ENSG00000134109.6	11.6902	9.5874	8.4519	13.0597	13.1694	15.5399	0.443947	0.00202743	0.161595
BAI2	ENSG00000121753.8	6.6918	7.12	7.2288	5.888	5.6008	5.3584	-0.428858	0.00218584	0.162377
HR	ENSG00000168453.10	1.9992	2.086	2.0702	1.7744	1.538	1.6456	-0.53613	0.00252825	0.165863
ZNF185	ENSG00000147394.14	3.3319	3.5459	3.5907	2.8077	2.6992	3.0048	-0.530889	0.00255896	0.165863
PLEKHG5	ENSG00000171680.16	4.5443	5.0087	4.6528	3.9275	3.752	3.868	-0.461272	0.00235766	0.164254
POT1	ENSG00000128513.10	1.336	1.2457	0.7053	1.6775	2.0898	2.6574	0.744655	0.00273461	0.165863
SIGIRR	ENSG00000185187.8	4.9602	5.9849	4.7589	4.0994	4.4543	3.6797	-0.591553	0.00257731	0.165863
PJA2	ENSG00000198961.5	8.8919	6.5672	3.7139	9.6287	10.7926	14.288	0.784094	0.00226448	0.162377
CDK10	ENSG00000185324.17	7.2717	8.0884	7.8269	6.253	6.2718	6.0824	-0.425631	0.00225517	0.162377
EXOSC6	ENSG00000223496.1	30.1616	32.2379	31.1522	25.8587	25.2662	24.7652	-0.410535	0.00225223	0.162377
NPAS2	ENSG00000170485.12	8.3684	8.2596	8.6073	6.83	6.4728	7.1005	-0.345852	0.00203126	0.161595
UBXN4	ENSG00000144224.12	7.1116	5.2473	4.5223	8.0141	8.1703	10.2214	0.52059	0.00236346	0.164254
FBXO27	ENSG00000161243.4	5.018	5.3315	5.4629	4.2071	4.3501	3.8308	-0.587501	0.00268208	0.165863
PABPC4L	ENSG00000254535.2	0.1958	0.1502	0.1956	0.3904	0.365	0.4636	1.04161	0.00256303	0.165863
ZNF555	ENSG00000186300.7	0.36	0.3328	0.2204	0.5752	0.5062	0.7763	0.810724	0.00294997	0.165863
PCBP4	ENSG00000090097.16	24.7287	26.0194	24.8644	21.234	20.7318	17.945	-0.402011	0.00210767	0.161595
GPX8	ENSG00000164294.9	6.611	5.5266	4.4263	7.6473	8.9716	9.675	0.492839	0.00250002	0.165863
RAC3	ENSG00000169750.4	61.1623	62.0512	63.5354	52.2993	51.1922	45.0326	-0.389432	0.00213918	0.161883
PDLIM7	ENSG00000196923.9	35.8333	36.118	38.125	30.0563	29.9296	26.1014	-0.345028	0.00197507	0.161595
RNPEPL1	ENSG00000142327.7	10.7269	11.5564	11.0403	9.1514	9.1881	7.1671	-0.461362	0.00219594	0.162377
ERBB2	ENSG00000141736.9	0.4776	0.4038	0.3608	0.3366	0.2198	0.281	-0.767823	0.00306022	0.165863
ROBO4	ENSG00000154133.10	0.4506	0.4225	0.4814	0.2539	0.3373	0.2461	-0.881995	0.00302987	0.165863
RFNG	ENSG00000169733.7	21.8754	22.8284	22.7118	18.4403	18.9178	16.0367	-0.404628	0.00220015	0.162377
ANGEL2	ENSG00000174606.8	4.5097	3.7568	2.9417	5.2529	5.557	6.4735	0.48604	0.00247715	0.165863
TNFSF12	ENSG00000239697.6	6.8486	7.352	7.6179	6.1142	5.5674	6.0163	-0.512469	0.00265777	0.165863
MMP24	ENSG00000125966.8	9.8759	9.8962	9.6575	8.6184	7.4915	7.8565	-0.433384	0.00244157	0.165863
PIR	ENSG00000087842.6	5.449	4.1071	4.64	8.2217	7.2871	8.4358	0.527691	0.00275472	0.165863
GRIK5	ENSG00000105737.5	9.2344	9.3829	9.8773	8.0937	7.641	6.9506	-0.457552	0.00242205	0.165863
WDR13	ENSG00000101940.13	14.5524	13.7529	13.4179	12.2069	11.1456	10.2113	-0.427304	0.00234981	0.164254
PTMS	ENSG00000159335.11	425.605	448.853	497.596	385.937	377.083	357.938	-0.27865	0.00150724	0.158517
TTK	ENSG00000112742.5	1.3649	1.5502	0.8767	1.9496	2.4098	2.9524	0.716101	0.00296587	0.165863
TOMM20	ENSG00000173726.6	49.9274	40.0916	34.5458	53.6765	51.9567	62.5214	0.46486	0.0019467	0.161595
MICAL1	ENSG00000135596.13	8.4832	9.0655	9.1642	7.4406	7.3224	6.5633	-0.423409	0.00233588	0.164254
WDR83	ENSG00000123154.7	5.9119	6.2777	6.2505	4.9686	5.1564	4.3013	-0.596136	0.00283774	0.165863
TAX1BP1	ENSG00000106052.9	7.0686	6.7327	4.3277	8.1009	9.0911	11.2775	0.583345	0.00228484	0.162717
CAMK1	ENSG00000134072.6	11.6666	11.7281	11.4865	9.7573	9.9146	8.3239	-0.498302	0.00258411	0.165863
MAPK12	ENSG00000188130.9	8.1802	8.8529	8.6091	7.2937	6.765	5.5364	-0.464178	0.00228991	0.162717
CCDC181	ENSG00000117477.8	0.6194	0.5808	0.2208	0.9177	1.118	1.4413	1.20868	0.00299778	0.165863
SERINC2	ENSG00000168528.7	10.9031	10.1764	11.6101	9.4452	8.4523	8.0933	-0.474989	0.00256835	0.165863
PPIP5K2	ENSG00000145725.15	0.8307	0.7789	0.4928	1.1175	1.0986	1.4923	0.598549	0.00283251	0.165863
MALL	ENSG00000144063.3	1.2369	1.5767	1.3133	0.6856	1.1234	0.8567	-0.865748	0.00320293	0.165863
ZDHHC12	ENSG00000160446.14	17.5576	19.641	18.7534	15.1991	15.5664	13.7797	-0.455331	0.00250748	0.165863
CDKN1A	ENSG00000124762.9	221.538	232.762	238.953	197.124	200.779	178.747	-0.241527	0.00155074	0.158517
EFCAB7	ENSG00000203965.8	0.3627	0.3545	0.1781	0.5668	0.5605	0.8447	0.996293	0.00320632	0.165863
SLC25A36	ENSG00000114120.7	1.8217	1.4309	1.1162	2.1751	2.2684	3.1679	0.581339	0.002843	0.165863
STT3A	ENSG00000134910.8	23.8729	22.5866	23.9483	27.5204	27.8493	30.0288	0.30859	0.00199581	0.161595
ANK1	ENSG00000029534.15	1.6425	1.6127	1.572	1.4299	1.2606	1.2562	-0.522634	0.00290302	0.165863
RANBP2	ENSG00000153201.11	2.0965	1.8081	0.9829	2.4869	2.7035	3.5249	0.688145	0.00272955	0.165863
GOLGB1	ENSG00000173230.11	1.5336	1.2256	0.6569	1.8686	1.9446	2.435	0.713684	0.00286981	0.165863
ABTB2	ENSG00000166016.4	4.6022	4.2986	4.9891	3.8328	3.8364	3.3205	-0.545986	0.00283047	0.165863
DUSP5	ENSG00000138166.5	10.8054	12.3095	14.7589	8.3592	10.7465	8.9801	-0.59446	0.00271887	0.165863
MYEOV	ENSG00000172927.3	0.8194	0.7354	0.566	0.385	0.4663	0.4106	-0.888887	0.00321003	0.165863
CD59	ENSG00000085063.10	57.6386	56.3745	51.8872	61.0259	71.2	73.235	0.339576	0.00184381	0.159667
DMTF1	ENSG00000135164.14	1.7386	1.4462	0.9758	2.1265	2.1957	3.0699	0.616936	0.00290247	0.165863
ATF5	ENSG00000169136.4	16.5085	17.3931	19.2867	13.983	14.523	13.9196	-0.431552	0.00257332	0.165863
LIMA1	ENSG00000050405.9	15.9343	14.1045	11.0249	17.195	19.0762	23.5856	0.518874	0.00226895	0.162377
FOXP4	ENSG00000137166.10	11.3634	11.5712	12.9337	9.3928	10.062	8.8099	-0.410461	0.00244921	0.165863
TRAPPC9	ENSG00000167632.10	0.9862	0.9448	1.0077	0.8303	0.8179	0.718	-0.47597	0.00274194	0.165863
KCTD20	ENSG00000112078.9	11.146	8.5328	7.062	12.2744	12.0913	15.228	0.508794	0.0024545	0.165863
DOCK11	ENSG00000147251.11	5.0723	4.0067	2.3514	5.7204	6.105	8.213	0.693724	0.00273291	0.165863
STMN2	ENSG00000104435.9	26.348	25.107	23.5678	31.4818	32.7021	41.5503	0.423638	0.00246765	0.165863
FAM110A	ENSG00000125898.8	2.5645	3.0207	2.7123	2.0911	2.1031	2.0442	-0.643381	0.00334204	0.165863
TMEM200B	ENSG00000253304.1	3.0354	2.7992	2.7307	2.1576	2.3252	2.198	-0.593627	0.00334244	0.165863
FST	ENSG00000134363.7	9.6356	8.6317	8.4055	6.9562	7.3464	8.2087	-0.433842	0.00289772	0.165863
PPIL1	ENSG00000137168.7	25.4836	24.875	20.5481	31.0321	33.844	36.0016	0.405268	0.00260492	0.165863
TBK1	ENSG00000183735.5	2.135	1.9499	1.3609	2.6549	3.1726	4.057	0.607345	0.00318372	0.165863
ABTB1	ENSG00000114626.13	1.6592	1.7972	1.5325	1.3095	1.4495	1.0414	-0.654061	0.00330118	0.165863
LTN1	ENSG00000198862.9	1.8312	2.0753	1.0361	2.6225	2.7093	3.518	0.665619	0.00302516	0.165863
CNN2	ENSG00000064666.10	95.2524	97.2139	96.5559	81.0423	80.6404	66.8812	-0.319359	0.00190745	0.160688
FASN	ENSG00000169710.6	73.4818	74.6498	84.205	64.7046	65.1164	61.5329	-0.24903	0.00168621	0.158517
C9orf37	ENSG00000203993.3	15.8981	16.3415	16.4454	12.5288	14.5364	12.9588	-0.466983	0.00292898	0.165863
FXR1	ENSG00000114416.13	3.6002	3.2079	1.9901	4.1353	4.5173	5.5456	0.589787	0.00273385	0.165863
MAD1L1	ENSG00000002822.11	6.8661	7.0669	7.1555	5.9945	5.6049	5.6901	-0.406527	0.00274185	0.165863
HHLA3	ENSG00000197568.9	9.9767	9.6248	11.2797	8.6084	6.9624	8.4983	-0.599907	0.00329176	0.165863
ZNF853	ENSG00000236609.3	13.1342	13.3745	14.4453	11.4725	10.7218	11.1459	-0.405992	0.00272391	0.165863
NUP210	ENSG00000132182.7	6.4728	6.0288	6.8112	5.5274	4.9546	5.1926	-0.410967	0.00273227	0.165863
PALM	ENSG00000099864.13	6.4226	6.6789	6.5568	5.4778	5.6161	4.5388	-0.506101	0.00292262	0.165863
E2F2	ENSG00000007968.6	2.3712	2.2839	2.9868	2.078	1.6914	1.9459	-0.639132	0.00329536	0.165863
SH2D5	ENSG00000189410.7	1.8807	1.9127	2.0667	1.3746	1.6438	1.4807	-0.629272	0.00345744	0.167324
HAGHL	ENSG00000103253.13	6.6874	6.4308	5.1331	5.161	5.0087	3.5299	-0.628311	0.00301253	0.165863
TLR4	ENSG00000136869.13	0.3433	0.5025	0.2853	0.6427	0.8241	0.9167	0.894114	0.00363792	0.167856
G3BP2	ENSG00000138757.10	13.2565	11.3031	9.2578	14.5946	14.9921	18.7689	0.479097	0.00247936	0.165863
EME2	ENSG00000197774.8	1.8055	1.8053	1.984	1.6196	1.3904	1.3889	-0.59038	0.00333814	0.165863
CDT1	ENSG00000167513.4	13.0745	13.9788	14.2657	10.8486	11.7317	11.0216	-0.424574	0.00284324	0.165863
CALU	ENSG00000128595.12	103.789	87.9761	80.0455	110.633	112.788	139.697	0.435726	0.00185526	0.159667
RARS	ENSG00000113643.4	19.1438	18.0104	12.5258	21.9902	23.0461	30.0008	0.535984	0.00265228	0.165863
DIEXF	ENSG00000117597.13	3.9915	3.4722	2.8946	4.6041	4.895	6.2801	0.481141	0.00285428	0.165863
ATP8A1	ENSG00000124406.12	0.1376	0.129	0.1209	0.2327	0.2256	0.3592	0.888398	0.00367401	0.167856
CYP24A1	ENSG00000019186.5	0.5651	0.5299	0.621	0.1458	0.2596	0.4711	-1.22146	0.00348074	0.167324
SERINC1	ENSG00000111897.6	17.6219	14.8129	9.6204	19.8432	20.7931	25.5143	0.582988	0.00278144	0.165863
AK1	ENSG00000106992.13	2.8055	3.2495	2.5569	2.0083	2.4941	1.982	-0.657081	0.00364508	0.167856
CD248	ENSG00000174807.3	11.8032	12.3902	13.8021	10.2055	10.6433	9.2351	-0.504101	0.00308108	0.165863
KLF9	ENSG00000119138.3	2.1221	1.9261	1.2313	2.9036	2.9238	3.3922	0.572886	0.00344187	0.167324
RD3	ENSG00000198570.5	1.1452	0.8416	1.0317	0.7692	0.5923	0.6799	-0.747624	0.00380906	0.168169
PEAR1	ENSG00000187800.9	0.8755	0.7836	0.8308	0.5934	0.5595	0.6513	-0.675694	0.00381046	0.168169
C19orf54	ENSG00000188493.10	5.8684	5.2701	5.2878	4.9613	4.339	4.1443	-0.518575	0.00333242	0.165863
VAX2	ENSG00000116035.2	3.9523	3.454	3.6684	2.5242	2.1579	3.1811	-0.714071	0.00384343	0.169067
GRIN1	ENSG00000176884.10	0.7988	0.6323	0.813	0.5169	0.537	0.5219	-0.718338	0.0038261	0.168581
PHF20L1	ENSG00000129292.16	0.9971	0.766	0.6173	1.2366	1.143	1.5999	0.535917	0.00325309	0.165863
ACBD3	ENSG00000182827.8	11.3168	8.6158	6.5693	12.5019	12.9125	16.6301	0.546189	0.00298255	0.165863
ZNF615	ENSG00000197619.9	0.3524	0.3474	0.2085	0.525	0.6352	0.7779	0.931944	0.00380237	0.168169
RGS19	ENSG00000171700.9	10.7951	10.4916	11.9587	8.7866	9.4918	8.7041	-0.510518	0.00329481	0.165863
NARS	ENSG00000134440.7	16.0163	13.5341	9.2612	17.5835	18.7011	23.7497	0.567941	0.00277994	0.165863
CHMP5	ENSG00000086065.9	19.183	19.4258	12.9072	23.4477	25.7933	28.795	0.495285	0.00292913	0.165863
PIDD	ENSG00000177595.13	4.387	4.4299	5.2081	3.9219	3.4792	3.7621	-0.505254	0.00323521	0.165863
ROR2	ENSG00000169071.10	1.3995	1.1917	1.2885	1.0782	0.966	0.9327	-0.614423	0.00376833	0.168169
AGTPBP1	ENSG00000135049.11	0.927	0.7271	0.6366	1.2899	1.2113	1.7241	0.654468	0.00386615	0.16948
SPATA2L	ENSG00000158792.11	5.3376	6.3848	5.1443	4.4327	4.9237	3.826	-0.610288	0.0035474	0.167856
YY1	ENSG00000100811.6	9.1661	7.8057	8.1652	10.6687	10.8283	12.4622	0.37249	0.00276903	0.165863
PGAM5	ENSG00000247077.2	20.6284	22.0856	20.8859	16.6236	18.4944	14.476	-0.427532	0.00278262	0.165863
SLC44A1	ENSG00000070214.11	6.3124	4.8555	4.1067	6.7946	6.8027	8.3818	0.484408	0.00275876	0.165863
SLC25A46	ENSG00000164209.12	3.2641	2.5572	1.9161	3.6079	3.9861	5.3339	0.573177	0.00322257	0.165863
ENO1	ENSG00000074800.9	558.876	635.041	599.249	539.771	568.789	457.174	-0.204156	0.00134704	0.154923
ATRX	ENSG00000085224.16	2.0595	1.8062	0.7873	2.408	2.7798	3.8536	0.841496	0.00326352	0.165863
C9orf89	ENSG00000165233.13	12.6138	12.4167	12.6051	10.6971	10.5604	9.2616	-0.449082	0.00314255	0.165863
PLEKHB1	ENSG00000021300.9	4.3986	4.0574	4.2942	3.6193	3.648	2.9586	-0.538041	0.00342483	0.167324
PATZ1	ENSG00000100105.13	11.0012	10.5038	11.8425	9.1796	9.3019	8.5045	-0.395296	0.00292832	0.165863
COPB2	ENSG00000184432.5	12.046	10.1089	7.6595	13.3958	13.1983	17.4026	0.537777	0.00268144	0.165863
PDIA3	ENSG00000167004.8	127.439	102.363	115.469	142.419	134.783	157.25	0.345081	0.00192415	0.160974
AKAP5	ENSG00000179841.8	0.7089	0.5109	0.367	0.9635	0.8786	1.096	0.699913	0.00393665	0.170175
ZNF414	ENSG00000133250.9	12.6969	13.149	14.8893	10.9339	10.8234	11.0023	-0.500972	0.003362	0.165863
MIF4GD	ENSG00000125457.9	8.8681	8.8213	7.9018	7.3343	7.2049	7.0486	-0.470657	0.00346656	0.167324
FAM127C	ENSG00000212747.3	26.0759	24.6751	25.5608	21.4118	21.3208	20.4556	-0.388073	0.00303499	0.165863
SEC63	ENSG00000025796.9	4.5002	3.8111	2.5739	5.2598	5.2723	6.6788	0.547125	0.00312698	0.165863
MAPK6	ENSG00000069956.7	6.359	5.7749	3.3427	7.2459	8.3775	10.4612	0.631849	0.00320022	0.165863
S100A11	ENSG00000163191.5	567.116	546.138	518.421	461.894	441.324	404.98	-0.290232	0.00218368	0.162377
CAMK1D	ENSG00000183049.8	1.2782	1.0522	1.4267	1.0207	0.8608	0.9307	-0.646379	0.00379139	0.168169
A4GALT	ENSG00000128274.11	3.7238	4.2629	4.4864	3.0005	3.6443	2.7816	-0.656581	0.00376646	0.168169
TPT1	ENSG00000133112.12	329.827	375.993	357.922	366.756	413.002	414.634	0.234894	0.00156305	0.158517
NPAS1	ENSG00000130751.5	2.0114	1.7102	1.6484	1.4764	1.2781	0.924	-0.774115	0.00412536	0.17075
IRAK1	ENSG00000184216.7	103.965	117.946	108.321	89.4172	96.0133	81.9008	-0.291835	0.00212047	0.161838
SRSF3	ENSG00000112081.12	26.2093	25.6687	20.2776	28.7627	31.2037	35.6486	0.415043	0.00257388	0.165863
EPS8L1	ENSG00000131037.10	1.5822	1.5222	1.3945	1.3823	1.062	0.8671	-0.700459	0.00396765	0.170175
ESCO1	ENSG00000141446.6	0.8656	0.6087	0.3841	1.0129	1.1214	1.6896	0.854191	0.0041243	0.17075
MMP17	ENSG00000198598.2	4.6728	4.7629	4.5066	4.0985	3.8773	2.8046	-0.623035	0.00362356	0.167856
CISD3	ENSG00000230055.2	19.9817	21.8662	20.5407	16.8881	17.9495	15.8271	-0.410902	0.00311055	0.165863
YME1L1	ENSG00000136758.14	12.4617	10.9471	7.2481	14.4701	14.1868	17.2786	0.55343	0.0028533	0.165863
OSGIN2	ENSG00000164823.5	2.4634	1.9484	1.4775	2.9689	3.1945	4.0073	0.555231	0.00378517	0.168169
TM4SF1	ENSG00000169908.6	10.9912	11.2847	9.6781	14.1159	15.8571	15.5589	0.393	0.00314933	0.165863
PSMD7	ENSG00000103035.6	26.6485	25.9961	23.6172	32.2283	31.992	38.9254	0.382563	0.00290623	0.165863
HIC1	ENSG00000177374.8	1.1211	1.4952	1.4443	0.9007	1.0304	0.8423	-0.769946	0.00417339	0.17075
FAM171B	ENSG00000144369.8	1.5052	1.2695	0.7647	1.9322	2.0381	2.4037	0.645618	0.00395349	0.170175
EDEM3	ENSG00000116406.14	15.0807	12.2208	7.2757	16.0704	17.701	19.661	0.652045	0.00277579	0.165863
CTXN1	ENSG00000178531.4	130.585	135.971	130.074	104.893	112.735	94.8447	-0.330746	0.00263841	0.165863
ZNF581	ENSG00000171425.5	14.4258	16.0462	14.5148	12.6195	12.7127	10.8863	-0.511979	0.00353657	0.167856
SIPA1	ENSG00000213445.4	13.8223	14.4545	13.6762	11.7948	11.7973	9.5602	-0.43781	0.00310354	0.165863
DNAJC4	ENSG00000110011.9	13.312	12.9083	12.7156	11.1224	10.8381	10.7656	-0.407666	0.00336816	0.165863
TIMP3	ENSG00000100234.11	6.3968	5.7021	6.9452	4.6336	5.097	5.7521	-0.468186	0.0034915	0.167324
RIN1	ENSG00000174791.6	11.3391	12.9261	12.5222	9.6438	10.7012	8.0488	-0.471854	0.00311985	0.165863
XRCC5	ENSG00000079246.11	51.4165	44.5015	37.2624	52.6797	56.9248	71.4226	0.463442	0.00236672	0.164254
SLC35B4	ENSG00000205060.6	10.8097	8.5509	8.8374	12.5303	11.6198	14.4633	0.405612	0.00297698	0.165863
RAC2	ENSG00000128340.10	9.1606	9.5022	10.4483	7.4707	8.2885	7.9443	-0.492535	0.00359924	0.167856
FAM83H	ENSG00000180921.6	1.5102	1.3284	1.3173	1.101	1.1491	1.0259	-0.580701	0.00414666	0.17075
RASL10B	ENSG00000141150.3	12.8695	14.5535	12.7885	10.7753	11.6467	9.5641	-0.461889	0.00332641	0.165863
FAM65A	ENSG00000039523.13	21.7251	22.9337	26.0146	18.807	19.0165	17.6202	-0.337392	0.00273373	0.165863
PRR7	ENSG00000131188.7	17.7494	18.7202	17.3159	15.1477	14.67	15.1872	-0.422856	0.00352691	0.167856
KLF2	ENSG00000127528.5	2.7263	2.3109	2.828	1.7695	2.0186	1.9008	-0.683284	0.00436975	0.170971
BDP1	ENSG00000145734.14	1.005	0.8593	0.4394	1.3035	1.2644	1.7752	0.728859	0.00393216	0.170175
UGP2	ENSG00000169764.10	10.1249	8.1683	5.2493	10.9666	11.7983	13.9607	0.592406	0.00314442	0.165863
MAP2K3	ENSG00000034152.14	19.4293	21.076	21.3759	16.7864	17.6104	13.2311	-0.463931	0.00311873	0.165863
C21orf2	ENSG00000160226.11	2.3229	2.3959	2.3372	2.0932	1.888	1.736	-0.550807	0.00394663	0.170175
REEP2	ENSG00000132563.11	27.796	26.2891	28.3646	23.5541	22.5159	19.9565	-0.381289	0.00303456	0.165863
DNAJC10	ENSG00000077232.12	3.5804	3.0838	1.9134	3.874	4.2783	5.4567	0.633019	0.00305974	0.165863
CEP170B	ENSG00000099814.11	13.3768	13.4886	14.135	11.1336	11.6822	10.5657	-0.346085	0.002991	0.165863
DYNC2H1	ENSG00000187240.9	0.4529	0.3698	0.1659	0.5912	0.5884	0.8515	0.900118	0.00427534	0.17075
PCNXL4	ENSG00000126773.8	2.6908	2.168	1.8363	3.2325	3.2412	4.0243	0.461929	0.00364095	0.167856
BAIAP2	ENSG00000175866.11	3.6027	3.941	4.0767	3.1317	3.3163	2.8764	-0.463835	0.00346245	0.167324
TMED10	ENSG00000170348.4	50.537	40.6321	37.6686	52.0807	53.6989	61.0185	0.404132	0.00255433	0.165863
TBC1D22A	ENSG00000054611.9	8.4209	9.3739	9.3446	7.3314	7.6981	6.6134	-0.450938	0.00337684	0.165986
UTP14A	ENSG00000156697.8	16.5842	16.2973	16.8748	21.7245	20.1233	25.4553	0.382609	0.00307051	0.165863
KIF3A	ENSG00000131437.11	1.361	1.2761	0.7619	1.7455	1.8577	3.1864	0.746679	0.00409028	0.17075
FBXL5	ENSG00000118564.10	7.0643	6.4885	5.986	8.4838	9.5279	10.526	0.404584	0.00349074	0.167324
WDR19	ENSG00000157796.13	1.0069	0.7163	0.5287	1.2998	1.139	1.6449	0.644196	0.0042054	0.17075
GTPBP6	ENSG00000178605.8	22.3136	23.7341	23.2508	20.2779	18.8099	16.3122	-0.442698	0.00336802	0.165863
GTPBP6	ENSGR0000178605.8	22.3136	23.7341	23.2508	20.2779	18.8099	16.3122	-0.442698	0.00336802	0.165863
EPT1	ENSG00000138018.13	3.3872	2.9387	2.2355	3.8268	4.3252	5.669	0.529887	0.00360153	0.167856
RPL11	ENSG00000142676.8	253.776	283.541	258.129	303.466	318.438	323.567	0.256266	0.00213618	0.161883
PARD6A	ENSG00000102981.5	6.3002	7.9042	7.9632	5.9345	5.5098	4.8099	-0.681643	0.00422382	0.17075
FBXW4	ENSG00000107829.9	5.7944	5.6789	5.743	5.0784	4.6587	4.5887	-0.446889	0.00370486	0.167935
YIPF5	ENSG00000145817.12	12.3202	10.6042	8.664	14.5506	14.4061	16.722	0.422729	0.00339908	0.166773
MEF2BNB	ENSG00000254901.3	1.9745	2.0895	1.7466	1.6258	1.651	1.2888	-0.604003	0.00424479	0.17075
ZC3H11A	ENSG00000058673.11	7.1373	5.4074	3.8143	7.9844	7.4209	9.9007	0.580933	0.00324406	0.165863
GTF2H1	ENSG00000110768.7	4.8776	4.8649	4.1122	6.1196	6.7399	7.2403	0.399598	0.00351169	0.167856
ANKRD12	ENSG00000101745.11	0.3229	0.2825	0.1064	0.413	0.5043	0.6825	1.05719	0.00461539	0.170971
BBC3	ENSG00000105327.11	4.3486	3.662	3.7133	3.052	3.5046	3.1794	-0.516262	0.00418584	0.17075
SIPA1L3	ENSG00000105738.6	6.8649	6.908	7.6746	5.7242	5.9322	5.694	-0.36911	0.00327395	0.165863
MDGA1	ENSG00000112139.10	0.5935	0.5665	0.6365	0.4559	0.4871	0.4193	-0.639435	0.00447432	0.170971
TTLL11	ENSG00000175764.10	3.4488	3.5723	3.5572	2.7847	3.0924	2.7525	-0.543732	0.00420617	0.17075
ZMIZ2	ENSG00000122515.10	17.7241	18.0222	21.1275	14.6285	15.2867	15.0883	-0.334503	0.0029673	0.165863
SPC24	ENSG00000161888.7	7.5499	7.9949	8.5008	6.7138	6.7202	6.2449	-0.503171	0.00390965	0.170175
NUAK2	ENSG00000163545.7	4.8343	4.5935	4.8861	3.6421	4.5128	3.2697	-0.578452	0.0040971	0.17075
NUDT14	ENSG00000183828.10	3.2849	4.1139	3.231	2.7452	2.7719	2.3927	-0.663467	0.00453829	0.170971
SLC25A10	ENSG00000262660.1	36.1352	37.5967	35.2037	29.3493	31.4426	27.9164	-0.370806	0.00332496	0.165863
SLC25A10	ENSG00000183048.7	21.1293	21.9838	20.5846	17.1614	18.3853	16.3235	-0.370806	0.00332496	0.165863
TICAM1	ENSG00000127666.8	14.9176	14.666	16.4648	12.2079	12.9873	12.7261	-0.414901	0.00361504	0.167856
MT2A	ENSG00000125148.6	97.5461	108.333	98.5154	75.5577	89.1547	78.4688	-0.352739	0.00301282	0.165863
KIAA1377	ENSG00000110318.9	0.2472	0.2015	0.1122	0.3711	0.3966	0.3769	0.936829	0.00471198	0.171576
CCDC90B	ENSG00000137500.5	4.7092	4.5162	4.2386	6.428	6.0044	7.2154	0.39763	0.00364795	0.167856
FBXO30	ENSG00000118496.4	1.1383	1.1315	0.6388	1.5051	1.7342	1.9679	0.617461	0.00426149	0.17075
ATM	ENSG00000149311.13	0.7119	0.7212	0.3901	0.9211	0.9935	1.3331	0.635634	0.00404286	0.17075
TRIQK	ENSG00000205133.7	1.4008	1.0495	0.8128	1.6147	1.8251	2.3375	0.592658	0.00438306	0.170971
NARG2	ENSG00000128915.7	0.9292	0.8326	0.5951	1.1393	1.2303	1.6362	0.53742	0.00411295	0.17075
SMAGP	ENSG00000170545.12	9.3394	10.2997	10.3443	8.178	8.507	7.757	-0.450355	0.00376041	0.168169
NOX4	ENSG00000086991.8	0.1391	0.1239	0.0612	0.2288	0.2526	0.2883	1.17526	0.00417136	0.17075
SRP14	ENSG00000140319.6	115.948	116.745	117.497	128.734	143.015	156.551	0.309784	0.00266578	0.165863
SRPRB	ENSG00000144867.7	13.0669	12.9926	12.9588	17.6856	18.2076	16.7978	0.357427	0.0034214	0.167324
TIGD5	ENSG00000179886.4	7.4814	9.359	8.4417	7.0021	6.9051	5.954	-0.56757	0.00413561	0.17075
UBE2D3	ENSG00000109332.15	17.7685	15.5335	14.1216	18.3787	19.6955	22.2953	0.380223	0.00288943	0.165863
B2M	ENSG00000166710.13	107.929	116.772	103.85	121.026	136.068	143.81	0.300633	0.00249854	0.165863
PFN1	ENSG00000108518.7	963.892	1042.68	1090.83	853.789	894.851	839.075	-0.185624	0.00170707	0.158517
MTHFD2	ENSG00000065911.7	8.0705	7.008	6.6538	9.5419	9.8151	12.5352	0.42662	0.00369084	0.167856
SYT4	ENSG00000132872.7	5.3664	4.6412	3.0739	5.8945	7.1471	9.9314	0.627641	0.00398933	0.170175
FAM20B	ENSG00000116199.7	11.1945	8.7744	7.8405	12.0656	12.6625	14.0592	0.41629	0.00346077	0.167324
ZBTB41	ENSG00000177888.7	0.987	0.8869	0.3163	1.1948	1.5237	2.0379	0.994564	0.00464377	0.170971
HEXIM2	ENSG00000168517.6	4.7295	4.2119	3.7733	3.4806	3.5422	3.2823	-0.543837	0.00469626	0.171401
EXTL2	ENSG00000162694.9	6.4552	5.8359	4.6312	7.4477	8.2814	10.1401	0.463116	0.00386302	0.16948
NBEAL2	ENSG00000160796.12	2.5326	2.837	3.0982	2.2115	2.2371	2.3487	-0.484942	0.0040694	0.17075
RHOBTB3	ENSG00000164292.8	11.1962	8.8395	8.0653	12.1606	11.9846	16.0254	0.482596	0.00329705	0.165863
MPST	ENSG00000128309.12	8.6202	9.3831	9.0289	7.6665	7.6125	6.5532	-0.411852	0.00363917	0.167856
TMEM59	ENSG00000116209.7	17.8762	17.5659	15.0469	21.3754	23.226	22.3764	0.347928	0.00343063	0.167324
SENP7	ENSG00000138468.11	0.3922	0.2387	0.2193	0.5206	0.4676	0.7094	0.847098	0.00513626	0.172479
SDK1	ENSG00000146555.14	1.7064	1.4219	1.6623	1.3621	1.3185	1.2855	-0.488266	0.00432226	0.170971
EBF4	ENSG00000088881.16	8.0303	7.3963	7.5227	6.7006	6.5218	5.476	-0.484506	0.0041017	0.17075
RND3	ENSG00000115963.9	7.8498	8.1526	4.1851	9.2105	12.439	13.198	0.652964	0.003979	0.170175
SLC9A3R2	ENSG00000065054.9	23.2461	24.4936	24.9314	19.4105	21.3953	17.6442	-0.385633	0.00347188	0.167324
FBXO3	ENSG00000110429.9	0.6295	0.5637	0.4197	0.8452	0.8203	1.2741	0.605051	0.00474589	0.171576
MYH9	ENSG00000100345.16	203.95	201.017	237.475	179.988	181.886	175.706	-0.199395	0.00180385	0.159667
HEG1	ENSG00000173706.8	22.7358	18.919	21.3826	25.35	24.5843	27.8269	0.327283	0.00288448	0.165863
TFR2	ENSG00000106327.8	0.4866	0.6437	0.6016	0.4382	0.2749	0.3325	-0.89089	0.0052115	0.172479
PRKAR1A	ENSG00000108946.10	19.5979	16.2147	14.5704	20.6348	21.0032	26.5135	0.434549	0.00320188	0.165863
EPHB1	ENSG00000154928.12	0.4366	0.3975	0.4102	0.2012	0.2817	0.3228	-0.814285	0.00522377	0.172479
CLINT1	ENSG00000113282.9	8.9297	7.9452	6.1974	10.2829	10.1297	13.7295	0.478206	0.00367639	0.167856
INSL3	ENSG00000248099.3	0.3815	0.313	0.262	0.0523	0.0559	0.0507	-2.21588	0.0010399	0.146581
ASPM	ENSG00000066279.12	1.2492	0.8908	0.4354	1.3031	1.653	2.4492	0.901622	0.00461603	0.170971
RILP	ENSG00000167705.7	2.4964	2.7145	2.651	2.07	2.0645	1.4939	-0.71413	0.0051802	0.172479
RND2	ENSG00000108830.7	4.7748	5.2153	4.9362	4.4602	4.0565	3.6479	-0.515484	0.00439103	0.170971
ARL5B	ENSG00000165997.4	2.5688	2.0588	1.2367	2.8298	3.2962	4.3164	0.646884	0.00443158	0.170971
ABHD10	ENSG00000144827.4	4.0647	3.8113	3.41	5.3669	6.0934	7.1693	0.473767	0.00457121	0.170971
ZNF248	ENSG00000198105.7	0.7762	0.5171	0.4564	0.8883	1.1088	1.2085	0.666866	0.00517497	0.172479
ZNF10	ENSG00000256223.1	0.2383	0.2383	0.2531	0.4267	0.4467	0.5825	0.835588	0.00527317	0.172479
ARHGEF1	ENSG00000076928.13	15.0092	16.2156	16.0336	13.0114	13.3898	10.6892	-0.374392	0.0033532	0.165863
TMEM86B	ENSG00000180089.4	1.789	1.9495	1.8995	1.7759	1.0763	1.2848	-0.704967	0.0051634	0.172479
ZNF25	ENSG00000175395.11	1.1822	0.8849	0.433	1.4895	1.4701	2.1053	0.881081	0.00526595	0.172479
LMAN1	ENSG00000074695.5	12.1105	9.5746	6.7754	12.3078	14.0129	17.8972	0.595958	0.00360303	0.167856
HMHA1	ENSG00000180448.6	0.6368	0.6161	0.5806	0.3565	0.5556	0.3672	-0.76359	0.00540568	0.172479
WDR26	ENSG00000162923.10	8.8731	6.9496	6.1557	9.5118	9.5639	11.5998	0.445808	0.00354331	0.167856
PLEKHA8	ENSG00000106086.14	1.5892	1.2795	1.0772	1.908	2.0136	2.529	0.482569	0.00455819	0.170971
SLC18A3	ENSG00000187714.5	12.627	13.341	14.0954	11.0911	11.4681	9.9591	-0.470424	0.00424918	0.17075
FAP	ENSG00000078098.9	2.715	2.6047	1.6851	3.1559	4.0202	4.7026	0.553917	0.00445117	0.170971
ERP44	ENSG00000023318.7	9.4663	7.6602	7.144	10.7066	11.1753	12.6729	0.398253	0.00396292	0.170175
RASSF4	ENSG00000107551.16	2.2886	2.1328	2.2649	1.8424	2.0069	1.7219	-0.479598	0.00453763	0.170971
ZNF451	ENSG00000112200.12	0.799	0.6209	0.5686	0.97	1.0146	1.4276	0.528542	0.0047271	0.171576
SCUBE1	ENSG00000159307.14	0.5549	0.5033	0.6337	0.4971	0.2932	0.4163	-0.738279	0.0052828	0.172479
ANXA11	ENSG00000122359.13	25.3687	25.3445	27.1545	21.6072	21.8072	18.1621	-0.309866	0.00311057	0.165863
PHF6	ENSG00000156531.12	3.0861	2.8267	1.6835	3.4859	4.1881	5.1769	0.591241	0.00435496	0.170971
ADAMTSL5	ENSG00000185761.6	1.3999	1.8783	1.3633	1.0108	1.2668	1.0766	-0.693699	0.00535344	0.172479
PAICS	ENSG00000128050.4	43.2869	38.1344	34.9646	45.2511	47.4922	61.9118	0.429631	0.00315004	0.165863
UGGT1	ENSG00000136731.8	13.7634	10.8944	9.6353	14.4691	14.1847	18.0908	0.455426	0.00330443	0.165863
JPH2	ENSG00000149596.6	1.059	1.2638	1.123	0.9662	0.8416	0.7635	-0.655564	0.00530578	0.172479
TMEM145	ENSG00000167619.7	1.6171	1.1724	1.4839	1.0419	0.918	0.9746	-0.725252	0.00556315	0.172479
HIVEP3	ENSG00000127124.9	2.5961	2.5329	2.6589	2.1135	2.1751	2.3021	-0.389638	0.00423096	0.17075
C16orf59	ENSG00000162062.10	10.7179	11.5389	10.676	8.4876	10.0634	8.6215	-0.449318	0.00438185	0.170971
SNX29	ENSG00000048471.9	2.2945	1.9067	2.3373	1.8152	1.6887	1.9294	-0.460911	0.00453946	0.170971
PALD1	ENSG00000107719.8	1.5943	1.0328	1.4546	0.8581	1.0528	0.9859	-0.701566	0.00545137	0.172479
LAPTM4A	ENSG00000068697.6	92.0511	86.1843	88.5019	99.4844	107.049	111.731	0.290947	0.00321464	0.165863
TP53I11	ENSG00000175274.14	3.2251	3.1477	3.4122	2.6552	2.9076	2.4976	-0.484453	0.00458768	0.170971
CLEC11A	ENSG00000105472.8	7.7352	7.5059	7.3469	6.1797	6.0064	6.7237	-0.499357	0.00507927	0.172479
DNPH1	ENSG00000112667.8	30.7032	33.2788	30.2179	26.0188	27.7619	22.9403	-0.448444	0.0042935	0.170904
OSBPL5	ENSG00000021762.15	4.4331	4.8642	5.1564	4.298	3.7157	3.5588	-0.479624	0.00436178	0.170971
SAMD9	ENSG00000205413.3	0.9442	0.8793	0.3882	1.1409	1.4373	1.9389	0.858709	0.00535321	0.172479
IL4I1	ENSG00000104951.11	0.6525	0.5958	0.4718	0.2824	0.342	0.2555	-1.0517	0.00505855	0.172479
GSTT1	ENSG00000184674.8	7.2241	6.9033	7.0267	6.1771	6.0877	4.8371	-0.513662	0.00455062	0.170971
ANKRD50	ENSG00000151458.7	5.4603	4.5614	3.2448	5.7451	6.7313	8.6866	0.566001	0.00410201	0.17075
ZNF780A	ENSG00000197782.10	0.4591	0.3527	0.2067	0.6125	0.6091	0.7407	0.789201	0.00570252	0.173414
OSTC	ENSG00000198856.8	21.6116	22.1527	16.57	27.4844	30.9318	29.913	0.413998	0.00425334	0.17075
ATAD3B	ENSG00000160072.15	7.6005	7.7178	8.1772	7.075	6.1094	5.7357	-0.414696	0.00405791	0.17075
TRAM1	ENSG00000067167.3	24.14	21.2195	16.3625	25.7821	28.5874	40.4218	0.574678	0.00368358	0.167856
UBA7	ENSG00000182179.6	2.4306	3.2869	2.6922	2.4844	1.9514	1.9761	-0.634693	0.00510392	0.172479
EXOSC9	ENSG00000123737.8	4.2135	3.8544	3.2236	5.1419	5.5821	7.4671	0.476803	0.00464257	0.170971
INF2	ENSG00000203485.8	13.657	14.4506	14.5383	11.6161	12.4365	10.3393	-0.373048	0.00380795	0.168169
FPGS	ENSG00000136877.10	33.4888	35.7523	36.3928	28.7138	29.7895	26.0525	-0.324277	0.00354444	0.167856
AUH	ENSG00000148090.7	1.3831	1.019	0.6876	1.7872	1.7747	2.2751	0.746489	0.00576004	0.173468
CEP57	ENSG00000166037.6	1.2272	1.418	0.8514	1.7532	2.1639	2.253	0.580077	0.00515243	0.172479
PACS2	ENSG00000179364.9	7.7751	7.3337	8.356	6.9398	6.0435	5.8308	-0.372858	0.00379993	0.168169
CCDC66	ENSG00000180376.12	0.2514	0.2091	0.1251	0.3173	0.4113	0.4689	0.87123	0.00585396	0.174273
KIF14	ENSG00000118193.7	0.956	0.6241	0.4588	1.0083	1.2831	1.492	0.695164	0.00549168	0.172479
BTG2	ENSG00000159388.5	9.3549	8.5471	10.8938	7.1935	7.9487	8.1952	-0.476077	0.0046566	0.170971
FAM213B	ENSG00000157870.10	24.5845	25.7896	27.0874	21.6467	21.4206	19.8663	-0.357297	0.00387696	0.16948
CCNG1	ENSG00000113328.14	13.0645	11.3701	8.4981	14.043	16.6716	21.6971	0.534991	0.0042649	0.17075
MFAP3L	ENSG00000198948.7	0.6495	0.406	0.3652	0.7121	0.8672	1.0329	0.667095	0.0056245	0.172479
ARCN1	ENSG00000095139.9	43.2013	36.4964	36.3107	45.5742	45.7246	56.074	0.37371	0.00335101	0.165863
DPH7	ENSG00000148399.7	6.4027	6.3816	7.306	5.769	5.2774	5.4044	-0.454295	0.00461215	0.170971
MFAP3	ENSG00000037749.7	4.0516	3.1811	2.2865	4.3953	4.8683	6.0768	0.533163	0.00456736	0.170971
KCNC4	ENSG00000116396.9	0.4852	0.5654	0.6264	0.2841	0.4194	0.4606	-0.772229	0.00580987	0.174273
ZBTB42	ENSG00000179627.9	2.3443	2.6843	2.4523	1.9771	2.1787	1.6531	-0.617786	0.00540336	0.172479
ITGB4	ENSG00000132470.9	1.4517	1.2818	1.4378	1.3204	0.9228	0.9617	-0.629829	0.00544372	0.172479
RPP25	ENSG00000178718.5	11.6347	13.7245	13.6257	10.7619	10.5867	9.9418	-0.455816	0.00446392	0.170971
SLC38A1	ENSG00000111371.11	7.8461	6.1534	4.6852	8.0673	8.5999	11.5347	0.554253	0.00396396	0.170175
SPATA33	ENSG00000167523.9	2.7345	2.7005	2.7355	2.259	2.387	2.2714	-0.47885	0.00509114	0.172479
FLRT2	ENSG00000185070.6	0.5188	0.5269	0.3061	0.7794	0.7935	0.8628	0.655653	0.00572924	0.173414
BUB3	ENSG00000154473.13	22.3979	20.3185	17.9988	24.7675	26.5465	31.0641	0.383994	0.00397438	0.170175
RHOQ	ENSG00000119729.6	12.5778	9.4437	9.1409	13.2363	14.2668	17.8547	0.456139	0.00416946	0.17075
MFAP1	ENSG00000140259.6	6.5472	6.052	4.5042	8.1746	8.7135	11.2167	0.489909	0.00499509	0.172479
ACOT11	ENSG00000162390.13	2.699	2.3406	2.6588	2.2033	2.1802	2.088	-0.447545	0.00481282	0.172479
CHCHD10	ENSG00000250479.4	21.2943	21.9997	23.7909	18.2018	19.3364	17.9548	-0.443199	0.0046897	0.171401
C11orf96	ENSG00000187479.4	7.0109	5.9129	6.7665	5.5921	5.0847	5.9336	-0.48216	0.00514564	0.172479
HADHA	ENSG00000084754.6	50.0753	43.8145	49.1558	56.8821	54.4333	60.7853	0.303173	0.0033479	0.165863
CCBL1	ENSG00000171097.9	2.6882	2.7153	2.9539	2.4114	2.1759	2.013	-0.586595	0.00547727	0.172479
SRRM3	ENSG00000177679.14	2.3804	2.46	2.7916	2.238	1.9492	1.9928	-0.527818	0.00510357	0.172479
ERO1LB	ENSG00000086619.9	0.2167	0.2975	0.2466	0.4836	0.417	0.6579	0.858085	0.00605956	0.17557
GABPA	ENSG00000154727.6	2.4888	1.7863	1.2561	2.6487	3.1058	4.4633	0.66099	0.00522242	0.172479
ARVCF	ENSG00000099889.9	2.9049	2.7458	3.0029	2.5067	2.4034	2.3136	-0.49268	0.00518647	0.172479
NOL11	ENSG00000130935.5	8.7502	8.2572	5.408	9.5628	11.805	13.856	0.535135	0.00442613	0.170971
EIF5AL1	ENSG00000253626.2	2.0559	2.7785	2.764	1.977	1.8166	1.7701	-0.674571	0.00560101	0.172479
FERMT2	ENSG00000073712.9	7.1475	5.2131	4.6148	7.3147	7.9557	10.2353	0.499217	0.00423431	0.17075
MAP9	ENSG00000164114.14	1.6498	1.4957	0.7536	2.0921	2.1482	2.7623	0.66649	0.00519356	0.172479
PDZD4	ENSG00000067840.8	4.3802	4.7099	4.3496	3.9872	3.684	3.545	-0.479168	0.00508893	0.172479
PLCZ1	ENSG00000139151.10	0.039	0.0365	0.0286	0	0	0	-2.59343	0.000728179	0.134273
HMCN2	ENSG00000148357.12	0.5232	0.4739	0.4771	0.437	0.3294	0.3745	-0.60606	0.00595752	0.174804
FAM69A	ENSG00000154511.7	1.0943	1.1223	0.7704	1.556	1.8029	2.2717	0.705621	0.0061789	0.17557
TRNP1	ENSG00000253368.3	46.2623	56.0757	56.4167	40.0004	45.4574	38.7298	-0.391145	0.00398885	0.170175
DUS3L	ENSG00000141994.11	11.6859	12.5097	11.8188	9.9503	10.661	8.58	-0.445661	0.00457996	0.170971
ATP2B3	ENSG00000067842.13	1.0632	0.8436	1.0335	0.807	0.7186	0.7451	-0.59982	0.00585321	0.174273
ZNF24	ENSG00000172466.11	3.5553	3.2287	2.2609	3.8454	4.9771	5.8693	0.539855	0.00473166	0.171576
ATP5D	ENSG00000099624.3	39.4839	42.7941	36.6663	32.3917	34.2686	27.8797	-0.397698	0.00410473	0.17075
APBA1	ENSG00000107282.5	2.6944	2.0969	2.3538	2.1343	1.6651	2.1335	-0.507403	0.00533206	0.172479
COPS8	ENSG00000198612.6	17.3898	17.9587	16.2336	20.6223	23.863	22.7927	0.336468	0.00399582	0.170181
ROBO3	ENSG00000154134.10	2.4681	2.3377	2.8705	2.1359	2.1503	1.8176	-0.552139	0.00526058	0.172479
MMD	ENSG00000108960.3	9.3373	7.1703	6.1502	10.4954	10.7931	13.5757	0.461633	0.00481931	0.172479
MRPL2	ENSG00000112651.7	13.781	14.5146	15.5245	11.9733	12.5507	11.5335	-0.428803	0.00474402	0.171576
MRPL3	ENSG00000114686.4	25.6457	22.5874	19.506	27.3886	30.5773	36.372	0.414499	0.00419633	0.17075
NOVA2	ENSG00000104967.6	3.8164	3.0794	4.099	3.034	2.7611	3.0381	-0.464235	0.00486933	0.172479
ACOX2	ENSG00000168306.8	1.2888	1.2512	1.4538	0.9128	0.9888	1.0425	-0.651237	0.00616652	0.17557
PKN1	ENSG00000123143.8	65.4647	68.7567	65.7106	55.5355	57.5865	45.5702	-0.315717	0.00330091	0.165863
ABHD14A	ENSG00000248487.4	8.4823	8.3645	8.2736	6.9801	7.5704	6.8071	-0.458813	0.00523728	0.172479
LDHB	ENSG00000111716.8	75.4839	69.7675	53.0011	79.2323	84.545	98.3405	0.433535	0.00348006	0.167324
C1orf106	ENSG00000163362.6	0.2765	0.183	0.2591	0.0981	0.1048	0.1383	-1.12581	0.00551649	0.172479
NR1D1	ENSG00000126368.5	5.0649	5.1213	6.8917	4.1779	4.7806	3.8139	-0.630894	0.00550641	0.172479
MLPH	ENSG00000115648.9	13.4193	13.9337	13.5232	11.0521	12.1944	9.8924	-0.358714	0.00411591	0.17075
SREK1	ENSG00000153914.11	0.8325	0.715	0.4163	1.0027	1.0884	1.2797	0.582629	0.0054249	0.172479
SSBP4	ENSG00000130511.11	29.9387	32.0267	31.9717	25.2143	27.9317	21.4547	-0.402229	0.00420895	0.17075
TAOK1	ENSG00000160551.5	2.5557	2.2141	1.3359	2.7594	3.1218	4.0911	0.608095	0.00467202	0.171216
MAPK8IP2	ENSG00000008735.10	5.5133	5.6628	5.8208	4.9226	4.8634	4.1823	-0.448322	0.00492921	0.172479
AMD1	ENSG00000123505.10	15.6537	14.6659	8.6624	17.6554	19.1735	24.8433	0.585455	0.00448961	0.170971
NUDT19	ENSG00000213965.3	8.3961	7.2467	7.9058	6.7494	6.8821	6.2277	-0.454147	0.00522295	0.172479
DCTN4	ENSG00000132912.8	9.3005	7.4987	7.2656	10.0615	10.6068	13.683	0.430531	0.00443588	0.170971
C15orf39	ENSG00000167173.14	4.0741	3.7988	4.893	3.4206	3.4955	3.3321	-0.501251	0.00520492	0.172479
FAM83G	ENSG00000188522.10	8.252	9.2086	9.5894	6.7702	8.0979	6.5216	-0.417026	0.00442896	0.170971
SLC7A5	ENSG00000103257.4	29.7653	33.0669	32.7184	39.3967	44.3045	34.9387	0.335697	0.00372781	0.168169
CNIH2	ENSG00000174871.6	18.6559	16.7946	16.1759	15.1597	14.9034	12.4578	-0.446071	0.00493849	0.172479
NF2	ENSG00000186575.13	12.1664	12.2424	11.8853	9.8259	10.284	10.2365	-0.317837	0.00428325	0.17075
STT3B	ENSG00000163527.5	11.5874	8.8797	6.352	12.3285	12.5564	17.5164	0.576855	0.00453665	0.170971
EPS8L2	ENSG00000177106.10	0.5412	0.4132	0.3993	0.3221	0.2808	0.2547	-0.791913	0.00660155	0.177029
PURB	ENSG00000146676.5	8.4093	7.0245	6.0449	8.8684	9.4367	11.5489	0.426907	0.00431786	0.170971
ZNF488	ENSG00000165388.8	0.9017	0.8547	0.6968	0.5214	0.5688	0.6635	-0.674189	0.00659199	0.177029
PRUNE2	ENSG00000106772.13	1.463	1.1794	0.843	1.6268	1.8081	2.2692	0.5167	0.00524712	0.172479
GRTP1	ENSG00000139835.9	2.9994	2.3928	2.9317	2.2892	2.0967	2.043	-0.599409	0.00619154	0.17557
GTF3C3	ENSG00000119041.6	2.6575	2.4744	1.4907	3.3279	3.3456	4.2532	0.536479	0.00534398	0.172479
UQCRC2	ENSG00000140740.6	10.6329	9.9285	8.0801	12.2859	12.736	15.3024	0.40345	0.00458334	0.170971
HMGB2	ENSG00000164104.7	24.0127	22.0693	19.1017	26.6747	28.6341	33.3267	0.378788	0.00442969	0.170971
MOSPD2	ENSG00000130150.7	1.0661	0.9558	0.5131	1.3053	1.4222	2.2827	0.769509	0.00625468	0.175955
USO1	ENSG00000138768.10	8.4401	7.1325	4.781	9.0729	10.4217	12.462	0.530068	0.0049016	0.172479
FOXD1	ENSG00000251493.2	0.9907	1.3698	1.5316	0.5523	0.8066	0.9816	-0.931928	0.00679926	0.177306
UBE2H	ENSG00000186591.7	38.9999	32.1909	31.1204	41.9584	38.947	46.7349	0.352902	0.00358248	0.167856
MDH1	ENSG00000014641.13	13.0196	12.9186	9.4442	15.2408	17.7008	16.0395	0.409954	0.00449483	0.170971
PNKP	ENSG00000039650.5	9.3983	10.1564	11.2042	8.0082	8.9517	8.0283	-0.447601	0.0050767	0.172479
NOL12	ENSG00000100101.13	2.683	2.8183	2.9881	2.2957	2.5477	2.1183	-0.464846	0.00520714	0.172479
ZNF385A	ENSG00000161642.13	10.4944	10.1516	10.9234	9.5932	8.1749	8.5641	-0.423646	0.00513984	0.172479
WHSC1L1	ENSG00000147548.12	2.4009	1.9157	1.6711	2.8727	2.5998	3.6161	0.462678	0.0049712	0.172479
ANKRD34A	ENSG00000181039.7	8.7391	9.0742	10.1121	7.9511	7.9109	6.1664	-0.518134	0.00517168	0.172479
TMEM38B	ENSG00000095209.7	1.4635	1.482	1.0507	1.8934	2.7776	2.5303	0.594973	0.00621851	0.17557
KCTD16	ENSG00000183775.6	0.0062	0.0202	0.0102	0.0405	0.0433	0.0589	1.8834	0.00307971	0.165863
MMADHC	ENSG00000168288.8	16.673	13.7687	11.2798	18.6322	20.3101	22.119	0.41578	0.00503468	0.172479
ACVR2A	ENSG00000121989.10	0.3902	0.2927	0.3216	0.6132	0.5638	0.6428	0.668539	0.0068771	0.177306
HSP90AA1	ENSG00000080824.14	85.2158	81.9784	48.0416	91.3781	111.037	139.16	0.688367	0.0031769	0.165863
PLCD3	ENSG00000161714.7	12.5778	11.9159	12.4887	10.8733	10.1752	8.6905	-0.385631	0.00452226	0.170971
TNPO1	ENSG00000083312.13	9.5985	8.3143	5.1203	10.024	11.073	13.6036	0.599046	0.0042153	0.17075
XPO4	ENSG00000132953.12	1.6265	1.4465	1.1332	1.9533	2.1119	2.709	0.470323	0.00559722	0.172479
POSTN	ENSG00000133110.10	6.4601	5.3172	2.9829	6.8796	7.9459	9.8883	0.637667	0.00512338	0.172479
CENPF	ENSG00000117724.8	2.5246	2.2964	1.2772	2.7927	3.2761	4.6967	0.675766	0.00520443	0.172479
DERL2	ENSG00000072849.6	5.5136	4.9824	5.0894	7.05	7.3478	7.4571	0.359339	0.00501887	0.172479
TMC6	ENSG00000141524.11	0.5991	0.6569	0.6416	0.4509	0.5591	0.3723	-0.694731	0.00673634	0.177306
DMXL2	ENSG00000104093.9	0.7172	0.547	0.2837	0.8667	0.844	1.179	0.734476	0.00621818	0.17557
PUM2	ENSG00000055917.11	7.958	6.8299	4.7744	8.4505	9.4812	11.9505	0.525164	0.00480021	0.172479
PIK3R1	ENSG00000145675.10	2.1698	1.5259	1.3042	2.5489	2.2841	3.2859	0.515158	0.00550119	0.172479
TWF2	ENSG00000247596.4	7.3837	8.0998	6.072	5.8995	6.6433	4.5137	-0.604471	0.0060845	0.17557
RGS5	ENSG00000143248.8	65.9091	57.4558	39.2267	68.4501	75.9072	99.6761	0.611414	0.00325779	0.165863
STX1B	ENSG00000099365.5	1.4568	1.6559	2.1374	1.1243	1.3635	1.3148	-0.686208	0.00640436	0.176663
SLC35A5	ENSG00000138459.4	3.6911	2.7722	2.2423	4.0668	4.5157	5.6293	0.500514	0.00573425	0.173414
SLC16A1	ENSG00000155380.7	7.2261	6.4294	5.2736	7.87	9.0665	10.8119	0.440564	0.00493821	0.172479
GOPC	ENSG00000047932.9	3.994	3.1947	2.1559	4.7246	4.5766	6.293	0.545541	0.00567084	0.173025
ZNF583	ENSG00000198440.5	0.273	0.2509	0.144	0.4071	0.3966	0.4817	0.80708	0.00713988	0.178099
PRR19	ENSG00000188368.5	2.1536	2.42	1.9533	1.6116	1.7822	1.635	-0.602721	0.00683776	0.177306
ENHO	ENSG00000168913.6	4.3118	3.8522	4.5593	2.6758	3.5742	3.0696	-0.677428	0.00699129	0.177306
RAD51	ENSG00000051180.12	4.5658	3.445	3.5982	3.3709	3.0798	3.2188	-0.503177	0.00629191	0.176127
GLI4	ENSG00000250571.2	5.183	4.9274	5.4107	4.7513	3.9132	4.3764	-0.492041	0.00600599	0.175266
IFFO2	ENSG00000169991.6	1.8422	1.9874	2.3447	1.505	1.7999	1.4817	-0.601731	0.00622612	0.17557
TMX4	ENSG00000125827.4	15.8884	12.213	11.1887	16.5909	16.6471	21.5514	0.459201	0.00443437	0.170971
SLC30A6	ENSG00000152683.10	7.6554	6.435	4.7404	8.1603	9.2943	11.28	0.48606	0.00514855	0.172479
RUNDC3B	ENSG00000105784.11	0.1028	0.0613	0.0205	0.1434	0.1971	0.3178	1.78527	0.00460854	0.170971
GPATCH11	ENSG00000152133.10	3.1702	2.8806	2.6696	3.9296	4.7735	5.9747	0.493923	0.00600328	0.175266
MCL1	ENSG00000143384.8	34.6738	28.8135	26.5212	36.7342	36.6618	42.9415	0.377603	0.00419231	0.17075
ONECUT2	ENSG00000119547.5	0.1437	0.1678	0.1251	0.2437	0.2636	0.2968	0.668387	0.00721426	0.178099
SCYL2	ENSG00000136021.13	3.0108	2.6794	1.5733	3.2945	4.1209	4.8532	0.582171	0.00565926	0.172869
PACSIN3	ENSG00000165912.11	12.5225	12.2965	14.1121	10.5907	11.2983	10.1309	-0.429121	0.00539611	0.172479
CLIC1	ENSG00000213719.4	259.271	290.154	274.246	230.215	251.207	201.616	-0.282015	0.0032903	0.165863
TUBB4A	ENSG00000104833.6	3.4794	3.4529	4.0606	3.049	2.8713	2.9962	-0.537208	0.0062821	0.176099
MAGI2	ENSG00000187391.13	1.6157	1.2753	1.309	1.1259	1.0695	1.3971	-0.47484	0.00620796	0.17557
LRRC32	ENSG00000137507.7	1.3128	1.6844	1.3558	1.0605	1.2027	1.0281	-0.634958	0.00687988	0.177306
SLC19A2	ENSG00000117479.8	1.5106	1.2141	0.9617	1.8797	2.0086	2.5486	0.576731	0.00683941	0.177306
UNC5A	ENSG00000113763.6	4.4548	4.2339	5.0396	4.1753	3.4912	3.3927	-0.524394	0.00593272	0.174804
ST8SIA4	ENSG00000113532.8	0.0508	0.0688	0.0186	0.1238	0.1059	0.1741	1.50261	0.00528701	0.172479
CYB5R4	ENSG00000065615.9	0.6669	0.6211	0.4116	0.9666	0.8188	1.2769	0.612025	0.00672091	0.177306
ATP5A1	ENSG00000152234.11	40.9747	34.4413	34.1487	43.506	42.2687	46.5986	0.304303	0.00372832	0.168169
ZFYVE16	ENSG00000039319.12	1.01	0.7526	0.4473	1.1831	1.1383	1.7714	0.687563	0.00636626	0.17663
MYRF	ENSG00000124920.9	2.6091	3.0532	3.5022	2.1912	2.5894	2.4226	-0.495947	0.00556787	0.172479
SLC25A45	ENSG00000162241.8	0.7396	0.5727	0.6958	0.5467	0.5055	0.4407	-0.650859	0.00714226	0.178099
NPDC1	ENSG00000107281.5	21.7571	21.5162	23.3427	18.318	19.8003	16.2538	-0.395747	0.00504552	0.172479
TBC1D15	ENSG00000121749.11	0.8546	0.8119	0.4819	1.0418	1.3569	1.494	0.631691	0.00674362	0.177306
ADORA2B	ENSG00000170425.3	4.8826	5.565	5.991	3.9912	4.5682	4.7861	-0.537279	0.00630566	0.176328
RAB3IL1	ENSG00000167994.7	3.5433	3.7479	4.4567	3.2747	3.0876	2.6611	-0.614073	0.00647929	0.176822
IDH1	ENSG00000138413.9	12.2408	9.9478	8.6463	13.6044	13.3797	16.3592	0.410731	0.00500764	0.172479
CAPZA1	ENSG00000116489.8	23.8286	23.9217	16.6991	25.2839	31.55	36.4489	0.509088	0.00452658	0.170971
PICALM	ENSG00000073921.13	18.8787	15.4235	14.0292	19.8544	20.3585	26.5211	0.441514	0.00449973	0.170971
SLC33A1	ENSG00000169359.9	2.5648	1.719	2.0296	2.8571	3.203	3.7561	0.469105	0.00572694	0.173414
ZNF511	ENSG00000198546.10	14.9629	17.1267	16.3683	13.4492	13.8819	12.1066	-0.409404	0.00520263	0.172479
ATF2	ENSG00000115966.12	2.7551	2.0595	1.6399	3.0038	3.425	4.4249	0.52679	0.00613247	0.17557
ATMIN	ENSG00000166454.5	6.5787	5.8522	5.3137	7.5056	8.1438	9.6217	0.387991	0.00525922	0.172479
CABP7	ENSG00000100314.3	0.1486	0.1393	0.1781	0.074	0.0316	0.0287	-1.8506	0.00302947	0.165863
HEXB	ENSG00000049860.9	12.7078	10.9381	9.7358	14.4277	14.196	16.1468	0.360653	0.00493863	0.172479
SCAMP1	ENSG00000085365.13	2.5988	2.4066	1.6046	3.0185	3.4516	4.7107	0.545604	0.00597741	0.175004
ZNF83	ENSG00000167766.14	0.6469	0.6117	0.4579	0.8776	0.9185	1.2062	0.568055	0.00700913	0.177306
UPP1	ENSG00000183696.9	4.8176	6.0771	5.6427	4.2804	4.8668	4.0575	-0.520572	0.00588054	0.174273
SYK	ENSG00000165025.10	0	0	0	0.0185	0.0198	0.0269	2.48414	0.00108785	0.146581
COPB1	ENSG00000129083.8	13.4585	10.673	7.1165	13.2697	16.0891	19.1272	0.577486	0.00495911	0.172479
OPRL1	ENSG00000125510.11	1.8974	1.9884	1.7307	1.5364	1.4965	1.4894	-0.550842	0.00704142	0.177368
YIPF6	ENSG00000181704.7	3.5061	3.1196	2.2297	4.1548	4.2358	4.8734	0.440646	0.00558301	0.172479
MANEAL	ENSG00000185090.10	8.7792	8.3275	8.7177	7.8985	7.21	6.2775	-0.478145	0.00591949	0.174804
EFHC1	ENSG00000096093.10	1.5179	1.3298	1.185	2.0176	2.0804	2.423	0.443185	0.00644418	0.176663
TRIM16L	ENSG00000108448.16	7.8997	9.4758	7.8205	13.3093	12.9951	11.0436	0.444256	0.00536784	0.172479
TTBK2	ENSG00000128881.12	0.9981	0.833	0.6564	1.2144	1.2623	1.6876	0.497773	0.00649494	0.176822
TCF7	ENSG00000081059.15	2.3531	2.1079	2.6578	2.0188	1.9267	1.8734	-0.483726	0.00602583	0.175391
PDGFA	ENSG00000197461.9	2.937	3.1913	3.4604	2.1855	3.0185	2.4454	-0.576507	0.00657452	0.177029
ZNF688	ENSG00000229809.4	4.9501	5.8292	4.8316	4.6291	4.3325	3.8995	-0.516181	0.00641514	0.176663
DBN1	ENSG00000113758.9	86.6496	89.4134	99.5249	79.2394	78.7607	72.4664	-0.250703	0.00355029	0.167856
SUV39H1	ENSG00000101945.12	8.7555	8.5404	8.7021	7.3499	7.6396	7.2779	-0.399703	0.00588086	0.174273
MICB	ENSG00000204516.5	5.0274	5.8418	5.4058	4.7003	4.5168	4.2452	-0.50922	0.00648955	0.176822
EVA1B	ENSG00000142694.6	41.7956	49.5152	40.6962	33.9494	40.5356	27.6578	-0.510921	0.00545248	0.172479
FSCN2	ENSG00000186765.7	0.654	1.022	0.8624	0.3107	0.6129	0.3475	-1.1439	0.00744859	0.178669
C11orf68	ENSG00000175573.6	40.6386	45.3929	41.0862	35.4304	36.5425	30.7874	-0.379623	0.0051413	0.172479
PLEKHG4	ENSG00000196155.8	6.7929	7.1803	6.9035	6.4466	5.5307	4.6472	-0.466412	0.00548946	0.172479
FOXD4L5	ENSG00000204779.2	0.0283	0.0531	0.0311	0	0	0	-2.51182	0.00123738	0.153464
VASP	ENSG00000125753.9	39.6126	42.7353	43.059	33.7553	36.4711	28.5921	-0.350675	0.00457729	0.170971
ISLR	ENSG00000129009.8	3.9218	3.8781	3.8206	3.5771	3.166	2.627	-0.569417	0.00694393	0.177306
ZNF292	ENSG00000188994.8	0.4861	0.3961	0.1989	0.5844	0.597	0.9514	0.796934	0.00732552	0.178315
PARP14	ENSG00000173193.9	2.1472	1.5965	1.1014	2.5518	2.3141	3.022	0.533878	0.00618074	0.17557
BMPR2	ENSG00000204217.8	3.5749	2.8454	2.0211	3.8383	3.9931	5.188	0.513168	0.00559585	0.172479
ZNF638	ENSG00000075292.14	1.2649	1.2006	0.6368	1.4927	1.7119	2.1391	0.606406	0.00632297	0.176444
SNX13	ENSG00000071189.17	0.6997	0.5932	0.3565	0.8054	0.9203	1.2138	0.608781	0.00677399	0.177306
NFIX	ENSG00000008441.12	30.4429	29.9919	33.9056	26.4396	25.34	24.1242	-0.286168	0.00438053	0.170971
DST	ENSG00000151914.13	2.1256	1.7422	0.9637	2.2781	2.3547	3.2173	0.684206	0.00502639	0.172479
PSMA5	ENSG00000143106.8	9.651	8.8263	8.4892	11.1867	12.8977	12.1167	0.341633	0.00530632	0.172479
ALDH3A2	ENSG00000072210.14	4.5737	4.0329	3.7226	5.6348	5.4542	7.0998	0.403194	0.00586832	0.174273
DEAF1	ENSG00000177030.12	15.4446	17.5395	16.3904	14.0876	13.9293	11.1482	-0.418953	0.00525255	0.172479
ZBTB38	ENSG00000177311.6	2.5368	2.3847	1.7679	2.9081	3.1527	4.0854	0.46222	0.00573636	0.173414
C6orf226	ENSG00000221821.2	13.4439	14.3314	13.542	11.4933	12.0003	7.7398	-0.670604	0.00739627	0.178669
TRPV2	ENSG00000187688.10	2.5397	2.5022	2.2241	2.2049	1.9333	1.7265	-0.554337	0.00729279	0.178138
CCDC150	ENSG00000144395.13	0.1	0.0767	0.0799	0.1793	0.165	0.1738	0.900104	0.00774845	0.179768
TWF1	ENSG00000151239.9	11.9434	10.548	5.9656	12.3949	15.5268	19.4277	0.641395	0.00557109	0.172479
PPP1R16A	ENSG00000160972.5	12.7225	13.1336	12.435	10.6776	11.1909	9.6945	-0.353812	0.00537948	0.172479
ABCA3	ENSG00000167972.9	6.9651	6.7318	7.914	6.3688	5.7352	5.4907	-0.399287	0.00557457	0.172479
TLCD1	ENSG00000160606.6	11.8844	11.4582	11.8051	10.8214	9.9509	6.7795	-0.624181	0.00682452	0.177306
KIAA1551	ENSG00000174718.7	0.8744	0.6833	0.4586	0.9079	1.3194	1.7672	0.739242	0.00759443	0.179768
RINT1	ENSG00000135249.3	6.8518	6.8762	5.5046	8.1722	9.7766	11.3139	0.433232	0.00610371	0.17557
PLXNB2	ENSG00000196576.10	66.9293	70.1198	72.753	62.7001	61.0061	54.2613	-0.242252	0.00367858	0.167856
YWHAQ	ENSG00000134308.9	146.476	131.608	130.118	153.692	158.112	182.96	0.284093	0.00380409	0.168169
BACH1	ENSG00000156273.11	1.8764	1.3797	0.9589	2.2198	2.3386	2.4853	0.535647	0.00682996	0.177306
PREX1	ENSG00000124126.9	3.6927	3.8784	4.3187	3.2334	3.5283	2.756	-0.506476	0.00628433	0.176099
MME	ENSG00000196549.6	17.9759	14.2839	9.1308	18.4624	18.575	25.5899	0.626596	0.00461931	0.170971
FAM3A	ENSG00000071889.12	7.4624	7.6188	6.7818	6.1865	6.5611	5.2926	-0.419811	0.00584103	0.174273
PLEK2	ENSG00000100558.4	2.3613	2.7289	2.2327	1.4449	1.8335	2.0427	-0.675857	0.00820367	0.18318
ATP13A3	ENSG00000133657.10	10.3287	9.1126	5.7181	10.7174	11.9936	15.8369	0.605029	0.00500935	0.172479
AKR1C2	ENSG00000151632.12	0.0868	0.0814	0.0874	0.2061	0.1779	0.1922	1.05062	0.00724069	0.178099
LRP12	ENSG00000147650.7	3.0116	2.1949	1.9094	3.4993	3.2224	4.1482	0.456559	0.00619774	0.17557
FICD	ENSG00000198855.2	1.5885	1.7505	1.6208	2.5445	2.7794	3.0258	0.501265	0.00733414	0.178315
SKIL	ENSG00000136603.9	1.7193	1.2409	0.7955	2.0835	1.8818	2.5487	0.596272	0.00702409	0.177368
SNAPC2	ENSG00000104976.7	35.3421	38.1526	37.5789	31.7273	31.789	25.9856	-0.390933	0.00544755	0.172479
NUDT12	ENSG00000112874.5	1.8918	1.9273	1.1799	2.5787	2.6357	3.4345	0.554929	0.00733189	0.178315
ZBED6CL	ENSG00000188707.4	2.0849	1.6818	1.7856	1.4454	1.4548	1.4664	-0.570951	0.00803326	0.180843
DOPEY2	ENSG00000142197.8	2.593	2.5364	2.8172	2.1055	2.1813	2.4762	-0.427067	0.0065263	0.177029
GRIN2D	ENSG00000105464.3	3.111	2.8117	2.3456	2.1792	2.6222	2.3238	-0.466263	0.00704768	0.177368
TRIM13	ENSG00000204977.5	1.7158	1.3075	1.2809	2.0544	2.3293	2.5184	0.445715	0.00692299	0.177306
MYL12A	ENSG00000101608.8	59.6375	59.0602	50.9426	63.5114	70.0757	71.7178	0.307772	0.00449907	0.170971
MYL12B	ENSG00000118680.8	90.4996	87.4346	68.8523	95.1935	110.916	108.513	0.369348	0.00469511	0.171401
TXK	ENSG00000074966.6	0.0127	0	0	0.0417	0.0743	0.0539	2.58143	0.00169734	0.158517
SPRN	ENSG00000203772.6	1.4137	0.9594	0.9913	0.9447	0.694	0.6726	-0.717731	0.00847077	0.184936
KIAA1109	ENSG00000138688.11	0.7181	0.5383	0.2693	0.9382	0.7381	1.2226	0.763529	0.00705177	0.177368
RPS12	ENSG00000112306.7	201.184	222.968	187.971	232.779	270.793	248.592	0.31857	0.00465897	0.170971
SLC39A10	ENSG00000196950.9	3.016	2.5714	1.9997	3.23	4.1	5.6267	0.555	0.00656287	0.177029
FGD6	ENSG00000180263.9	0.688	0.5588	0.4237	0.884	0.8522	1.1038	0.538619	0.00775584	0.179768
ALDOA	ENSG00000149925.12	193.304	212.841	210.584	182.274	190.55	152.341	-0.215849	0.00307273	0.165863
UBL4A	ENSG00000102178.8	22.5586	24.51	23.5201	19.577	20.998	16.9862	-0.395182	0.00574831	0.173414
PEG3	ENSG00000198300.8	0.1896	0.1334	0.125	0.2599	0.2666	0.3124	0.773229	0.00868207	0.186216
UBE2N	ENSG00000177889.5	23.6686	23.1943	20.0082	24.911	29.7878	31.7748	0.360129	0.00496532	0.172479
RSL1D1	ENSG00000171490.8	23.2944	24.2231	21.1405	26.7913	27.5263	33.4481	0.353424	0.00500468	0.172479
FAIM3	ENSG00000162894.7	0.7123	0.6679	0.7827	0.4932	0.4392	0.2789	-0.972866	0.0084565	0.184936
MYOZ3	ENSG00000164591.9	0.7974	0.5188	0.6527	0.4104	0.4099	0.5362	-0.708835	0.00866681	0.186038
IPO5	ENSG00000065150.14	15.1912	13.0321	11.7172	15.4478	16.7631	20.5283	0.40432	0.00489839	0.172479
PSMD1	ENSG00000173692.8	16.9718	14.3254	11.897	17.7303	19.1955	22.6611	0.420542	0.00538664	0.172479
CSDE1	ENSG00000009307.11	41.8407	36.8439	26.7747	42.2006	46.2594	57.0774	0.498753	0.00448215	0.170971
PPM1B	ENSG00000138032.16	2.1206	1.7855	1.5082	2.4334	2.9262	3.3578	0.452455	0.0070445	0.177368
CYCS	ENSG00000172115.4	13.8842	14.7777	10.4932	16.2833	18.1404	20.1305	0.410825	0.00562472	0.172479
MEGF9	ENSG00000106780.7	2.1004	1.4947	1.3683	2.5129	2.3726	3.4177	0.507768	0.00724742	0.178099
GHITM	ENSG00000165678.15	39.6693	40.2017	35.6595	46.9392	48.0017	56.9127	0.349205	0.00535378	0.172479
MKL1	ENSG00000196588.10	5.8095	6.3639	6.5761	5.3151	5.2234	5.1188	-0.412498	0.00642973	0.176663
TVP23B	ENSG00000171928.9	1.892	1.6192	1.2541	2.1896	2.7092	3.1042	0.496259	0.00743189	0.178669
HADHB	ENSG00000138029.9	24.4183	21.9872	20.8178	27.8458	27.1479	30.718	0.318818	0.00528115	0.172479
CAP1	ENSG00000131236.12	88.4061	76.7154	81.2579	93.8645	89.9727	108.631	0.289336	0.00420987	0.17075
SF3B1	ENSG00000115524.11	11.5171	9.4344	5.9848	12.0004	12.3226	16.9627	0.61058	0.00534157	0.172479
PGM2L1	ENSG00000165434.6	0.3153	0.3005	0.2158	0.425	0.5268	0.5659	0.668232	0.00882005	0.186393
OSR1	ENSG00000143867.5	22.6566	26.9064	28.2101	19.8994	22.3316	19.1852	-0.352051	0.00517297	0.172479
PHF21B	ENSG00000056487.11	2.2416	1.8579	2.3707	1.8369	1.7747	1.6506	-0.536603	0.0075738	0.179578
PITPNM2	ENSG00000090975.8	3.4432	3.7238	3.8575	2.959	3.3082	2.8787	-0.42881	0.00652587	0.177029
BRF1	ENSG00000185024.11	1.7076	1.6974	1.7404	1.5114	1.4928	1.2885	-0.398854	0.00621594	0.17557
RASSF8	ENSG00000123094.11	3.9071	3.4467	2.1975	4.29	4.9363	5.842	0.511836	0.00654253	0.177029
CHCHD5	ENSG00000125611.11	9.0742	10.5504	9.9971	8.4468	8.3402	7.728	-0.420402	0.00644953	0.176663
HIF1A	ENSG00000100644.12	18.1093	13.7588	9.7386	17.6902	20.0047	26.5049	0.592958	0.00550587	0.172479
SLITRK6	ENSG00000184564.8	2.0284	1.577	0.9408	2.0674	2.8063	3.7917	0.708935	0.00788575	0.180557
SMAD9	ENSG00000120693.9	6.5061	4.9828	4.3944	6.9477	7.3881	9.1874	0.436998	0.00637566	0.17663
SPTSSA	ENSG00000165389.6	8.0354	6.8954	5.5905	9.3833	9.7483	14.2004	0.493368	0.00682319	0.177306
MMAA	ENSG00000151611.9	0.3211	0.2365	0.2835	0.5154	0.4903	0.5057	0.663575	0.00899889	0.186918
TARS	ENSG00000113407.9	11.4996	9.9887	7.3164	12.3463	12.9135	16.5501	0.471279	0.0058151	0.174273
ARHGAP21	ENSG00000107863.12	5.0328	3.6392	3.0579	5.4639	5.0992	6.9086	0.485666	0.00606637	0.17557
SNTA1	ENSG00000101400.5	12.4408	12.9867	12.3285	12.0533	10.0617	8.6287	-0.49553	0.00677313	0.177306
DNAJB14	ENSG00000164031.12	0.9457	0.8615	0.5325	1.1955	1.1395	1.9029	0.620467	0.00747793	0.178669
SUCO	ENSG00000094975.9	3.7019	3.2709	2.0679	4.0279	4.7779	5.5884	0.519579	0.00664925	0.177306
KCND1	ENSG00000102057.5	3.3576	3.1696	3.9644	2.8752	2.9214	2.9081	-0.477209	0.00717517	0.178099
C2orf43	ENSG00000118961.10	3.6634	3.5219	2.5104	4.1745	5.5217	6.3874	0.505999	0.00720644	0.178099
ZNF48	ENSG00000180035.6	7.9232	7.4182	8.2157	7.0887	6.473	6.2971	-0.420111	0.0067896	0.177306
CARM1	ENSG00000142453.7	53.2762	53.99	58.8574	45.6921	45.6416	43.0922	-0.262379	0.00476997	0.171982
TTC39B	ENSG00000155158.16	0.1262	0.0845	0.0832	0.166	0.1774	0.2299	0.819888	0.00916361	0.186918
TMX3	ENSG00000166479.5	4.1494	3.7556	2.4762	4.5936	5.1584	6.505	0.506604	0.00659882	0.177029
NT5C	ENSG00000125458.2	42.2476	43.3961	39.0669	35.9681	36.0716	30.759	-0.372694	0.00603014	0.175391
ZNF512B	ENSG00000196700.3	16.3457	17.0614	16.9813	14.7858	14.1376	12.1805	-0.348493	0.00560421	0.172479
FSTL3	ENSG00000070404.5	52.482	56.9278	58.117	45.0773	49.2183	37.1225	-0.349325	0.00509179	0.172479
AGFG1	ENSG00000173744.13	4.618	3.9404	3.2378	5.0579	5.3882	6.6447	0.41735	0.0063362	0.176564
ANGPT1	ENSG00000154188.5	0.1484	0.145	0.0815	0.2509	0.2898	0.2432	0.947378	0.00908626	0.186918
RAB36	ENSG00000100228.8	7.3515	7.0841	7.3129	6.2036	6.6416	5.4672	-0.432042	0.00688925	0.177306
LBR	ENSG00000143815.10	5.0736	3.9329	3.7904	6.2693	5.5516	7.6882	0.435144	0.00686376	0.177306
TTC37	ENSG00000198677.6	2.6597	2.7845	1.2252	3.244	3.7405	4.8039	0.677289	0.007053	0.177368
TRA2A	ENSG00000164548.6	10.1269	8.6739	8.0332	12.0773	11.571	16.6174	0.440052	0.0065157	0.177029
PML	ENSG00000140464.15	8.4012	8.3339	8.8727	7.1713	7.4431	6.5491	-0.313177	0.00558259	0.172479
SOX13	ENSG00000143842.10	2.1852	2.3218	2.721	1.9466	1.9966	2.007	-0.4955	0.0074749	0.178669
PCED1A	ENSG00000132635.12	16.1875	17.0644	17.4574	15.7069	13.348	12.7288	-0.429063	0.00661447	0.177029
WDR4	ENSG00000160193.7	13.4063	14.771	14.9614	11.4556	13.1828	10.8661	-0.431239	0.00662149	0.177029
SEMA3C	ENSG00000075223.9	14.507	11.8972	7.2994	15.1892	15.8771	21.2997	0.61063	0.00572146	0.173414
EMD	ENSG00000102119.6	47.5641	51.9941	53.4879	42.1868	43.6249	39.7851	-0.322091	0.00565018	0.172788
SERPINB2	ENSG00000197632.4	4.3884	4.1599	4.3823	3.67	3.6402	3.711	-0.474906	0.00792983	0.180559
YWHAZ	ENSG00000164924.13	55.3463	47.0811	44.8082	56.9577	59.9717	74.5125	0.385872	0.00408727	0.17075
MIER2	ENSG00000105556.6	10.1495	9.8148	10.3379	9.2817	8.0422	8.3846	-0.387787	0.00668668	0.177306
GPR62	ENSG00000180929.4	0.1009	0.0568	0.0222	0	0	0	-2.54966	0.00184095	0.159667
JMY	ENSG00000152409.8	0.6571	0.3834	0.2942	0.6564	0.9238	0.8847	0.713738	0.00879483	0.186393
HMGCS1	ENSG00000112972.10	4.5679	3.2737	2.4789	5.1415	4.8471	7.3521	0.550977	0.00724621	0.178099
RAD51D	ENSG00000185379.16	2.2598	1.9303	2.1192	1.816	1.594	1.7731	-0.522905	0.00846405	0.184936
CEBPZ	ENSG00000115816.9	8.0166	6.4933	3.7183	8.643	9.2783	13.6766	0.644168	0.00690911	0.177306
CTSO	ENSG00000256043.2	1.9816	1.8441	1.3098	2.875	2.4787	3.4839	0.553434	0.00856579	0.185756
LSM2	ENSG00000204392.6	56.6402	63.4161	62.5995	49.5089	53.5266	47.3868	-0.363302	0.00615764	0.17557
TRIM65	ENSG00000141569.6	15.2906	16.6193	16.2081	13.577	13.7688	13.03	-0.343922	0.00619875	0.17557
SAC3D1	ENSG00000168061.9	12.6673	13.9502	13.8378	11.6007	12.047	9.662	-0.493821	0.00725315	0.178099
CNTFR	ENSG00000122756.10	10.1519	8.77	11.248	8.895	6.7964	9.0028	-0.497674	0.00741641	0.178669
PAOX	ENSG00000148832.10	2.5421	2.8105	2.5433	2.3295	2.0225	1.7542	-0.608174	0.00885708	0.186535
SYVN1	ENSG00000162298.12	14.6469	14.7548	15.2502	18.868	19.0174	18.623	0.297629	0.00572818	0.173414
ASF1A	ENSG00000111875.7	2.7278	2.4922	2.5172	3.7001	4.3021	5.0923	0.498525	0.00832473	0.184154
IQGAP2	ENSG00000145703.11	0.1503	0.1305	0.0979	0.2198	0.2349	0.3018	0.857239	0.00945269	0.18804
AZIN1	ENSG00000155096.9	12.938	10.6286	9.3176	13.6893	14.0825	17.5948	0.414469	0.00585991	0.174273
RRM2B	ENSG00000048392.7	3.4112	3.3175	2.0486	3.8791	4.9538	5.7504	0.529293	0.00733523	0.178315
NRGN	ENSG00000154146.8	10.9275	11.192	11.8971	8.5892	9.3752	11.0068	-0.471438	0.00781494	0.179768
TRMT10A	ENSG00000145331.9	0.5126	0.4241	0.2209	0.6281	0.7183	0.9828	0.875545	0.00965726	0.188837
PPIA	ENSG00000196262.9	262.496	267.811	249.498	280.026	312.397	293.801	0.222079	0.00331286	0.165863
NUCB2	ENSG00000070081.11	1.9968	1.8631	1.2531	2.3073	2.735	3.1678	0.480768	0.00745835	0.178669
SEC62	ENSG00000008952.12	3.9027	3.5397	2.1657	4.2484	4.943	6.1306	0.534706	0.0069131	0.177306
SHC2	ENSG00000129946.6	1.0095	1.1014	0.8975	0.7647	0.8171	0.7315	-0.594377	0.00923357	0.186979
HOMER3	ENSG00000051128.14	11.5755	14.4837	13.8082	10.0119	11.1505	11.1957	-0.415591	0.00667855	0.177306
STARD4	ENSG00000164211.8	3.5309	2.7372	1.7358	3.9306	4.0913	5.3001	0.549763	0.00750318	0.178669
GMIP	ENSG00000089639.6	4.4366	4.7117	4.9269	4.1545	3.9845	3.6272	-0.483292	0.00775018	0.179768
CCT4	ENSG00000115484.10	58.6939	51.1407	50.4662	61.3496	64.0264	72.0691	0.318962	0.00524053	0.172479
MFSD10	ENSG00000109736.10	18.3908	17.9365	16.7644	14.9239	16.0943	13.194	-0.379852	0.00648748	0.176822
C3orf38	ENSG00000179021.5	3.2016	3.0732	2.4196	4.1484	4.5515	5.4472	0.448043	0.00802112	0.180805
ADAMTS14	ENSG00000138316.6	1.4367	1.449	1.5604	1.273	1.0373	1.2784	-0.549069	0.00876666	0.186377
ZNF431	ENSG00000196705.4	0.6509	0.5057	0.5416	0.9278	0.9151	1.1267	0.601895	0.00954247	0.188381
CCNH	ENSG00000134480.9	2.3329	2.0634	1.7955	2.9305	3.4634	3.664	0.443386	0.00810339	0.181658
POLR2B	ENSG00000047315.10	13.8281	11.0287	8.7205	14.2367	14.7237	19.2157	0.477269	0.00604187	0.175391
LSS	ENSG00000160285.10	14.2168	14.6133	14.7872	12.4403	12.6594	10.9094	-0.322262	0.00585477	0.174273
VASH2	ENSG00000143494.11	0.2343	0.1663	0.1809	0.3402	0.3487	0.3837	0.749033	0.00990219	0.190217
PTGS1	ENSG00000095303.10	23.6194	21.131	23.3756	28.3141	28.0119	25.9799	0.282805	0.00546623	0.172479
NUCKS1	ENSG00000069275.12	36.4351	29.4792	23.7757	36.2092	37.1958	47.4505	0.466842	0.00499416	0.172479
CPD	ENSG00000108582.7	6.1355	4.9988	3.5081	6.5304	6.4228	8.4621	0.509215	0.00614614	0.17557
C4orf48	ENSG00000243449.2	31.1403	35.4142	34.5579	27.7188	31.1549	24.9869	-0.500581	0.00775724	0.179768
RGS11	ENSG00000076344.11	1.4127	1.4278	1.2298	1.2873	0.9672	0.9652	-0.578132	0.00908402	0.186918
GPR146	ENSG00000164849.7	0.2368	0.3004	0.1224	0.4428	0.4895	0.5033	1.06702	0.00936383	0.187857
FXYD5	ENSG00000089327.10	33.9837	35.1188	43.5487	29.6008	31.5274	28.211	-0.355952	0.00586729	0.174273
EHD4	ENSG00000103966.5	22.1627	19.9173	22.8837	18.6217	17.7511	17.175	-0.310684	0.00587127	0.174273
CRIP2	ENSG00000182809.6	46.5373	48.4897	45.9505	40.5201	39.6044	32.0254	-0.316865	0.0051517	0.172479
SNRPB2	ENSG00000125870.6	24.5697	25.0785	19.8771	29.9071	30.8815	35.6495	0.368482	0.00661824	0.177029
SLC30A1	ENSG00000170385.9	4.6955	3.6564	2.7478	5.1128	5.3975	6.9134	0.476587	0.00738766	0.178669
HERC5	ENSG00000138646.4	0.471	0.3723	0.3653	0.6682	0.6383	0.8834	0.671999	0.00998387	0.190305
HES6	ENSG00000144485.6	4.2997	3.9101	3.4665	3.4349	3.392	2.3653	-0.601665	0.00895688	0.186918
FNIP2	ENSG00000052795.8	0.5346	0.338	0.3783	0.6971	0.6263	0.8436	0.5683	0.00915872	0.186918
FAM13A	ENSG00000138640.10	0.3031	0.2311	0.1976	0.3907	0.4136	0.4602	0.583389	0.00957807	0.18839
LRRK1	ENSG00000154237.8	1.7852	1.6436	1.612	1.4869	1.497	1.412	-0.433789	0.00804468	0.180948
PREPL	ENSG00000138078.11	6.0191	4.6011	3.3457	6.1376	6.6407	9.0826	0.540217	0.00671993	0.177306
LEFTY1	ENSG00000243709.1	0	0	0	0.0766	0.1091	0.0247	2.52625	0.00206801	0.161595
CRELD2	ENSG00000184164.10	16.3354	15.5805	16.5178	21.7495	21.0148	19.2459	0.311069	0.00597486	0.175004
UBE2J1	ENSG00000198833.6	9.9721	9.0329	7.9705	11.1019	12.2358	15.702	0.414044	0.00674578	0.177306
RRAD	ENSG00000166592.7	6.4126	7.2202	4.5845	5.0824	5.3102	3.5036	-0.646099	0.00869468	0.186324
SH2D4A	ENSG00000104611.7	0.0849	0.0696	0.035	0	0.0124	0.0226	-2.34177	0.00321419	0.165863
ZNF408	ENSG00000175213.2	6.3202	6.4222	7.0708	5.4557	5.9806	5.2736	-0.460659	0.00784165	0.179768
GTPBP3	ENSG00000130299.12	6.9729	7.9131	8.0998	6.0371	6.7242	6.3892	-0.415196	0.00722304	0.178099
DBNDD1	ENSG00000003249.9	11.2218	10.5807	12.0842	9.2481	10.3069	8.6598	-0.410693	0.00709152	0.17771
UCKL1	ENSG00000198276.9	13.9338	15.8694	15.5762	12.6658	12.7207	12.3839	-0.378883	0.00690253	0.177306
2024-09-07	ENSG00000122545.13	9.6038	8.807	4.8098	10.3656	11.1429	15.3631	0.644165	0.00619114	0.17557
PSMA4	ENSG00000041357.11	14.3422	15.1034	11.5273	16.8809	18.0251	24.2119	0.443384	0.00647634	0.176822
RPRD1A	ENSG00000141425.13	5.6517	4.5789	4.2904	6.0653	6.5746	8.5536	0.425189	0.00684277	0.177306
COL13A1	ENSG00000197467.9	4.5489	5.0279	5.1559	4.1038	4.3323	3.9222	-0.432089	0.00748998	0.178669
CSPG4	ENSG00000173546.7	0.8707	0.6969	0.5834	0.5704	0.5909	0.5417	-0.555531	0.00946905	0.18804
CSE1L	ENSG00000124207.12	18.3327	16.6691	10.1116	18.0792	24.1488	31.0854	0.640091	0.00637282	0.17663
IFI44L	ENSG00000137959.11	0.3052	0.2902	0.2787	0.4618	0.4784	0.5893	0.574874	0.00981155	0.189649
GMPR	ENSG00000137198.5	10.3327	10.2246	10.2709	9.4477	8.6401	8.4462	-0.42626	0.00776368	0.179768
CCDC101	ENSG00000176476.4	6.776	6.9169	6.74	6.134	5.9963	5.2197	-0.484139	0.00834711	0.184345
STK32C	ENSG00000165752.12	5.6149	5.7191	4.9279	4.8758	4.8027	4.4099	-0.433532	0.00799919	0.180693
TNNT1	ENSG00000105048.12	6.9739	7.1283	9.5793	6.3569	6.0328	6.3133	-0.54241	0.00821329	0.18318
CCT2	ENSG00000166226.8	32.5767	33.9638	27.9308	36.9556	37.9151	48.9434	0.394808	0.005559	0.172479
C12orf4	ENSG00000047621.7	2.0496	1.7296	1.0869	2.423	2.6727	3.1634	0.544121	0.00870431	0.186324
NDRG2	ENSG00000165795.16	1.1426	1.0877	1.262	1.0354	0.881	0.886	-0.556942	0.00906716	0.186918
ELOVL5	ENSG00000012660.9	19.5102	15.5575	15.4037	21.7105	20.1957	26.5851	0.393292	0.00628269	0.176099
APLNR	ENSG00000134817.9	1.4314	1.1166	1.454	1.1869	0.916	0.8054	-0.678655	0.00993168	0.190305
FBXO38	ENSG00000145868.12	2.0891	1.8737	1.536	2.4786	2.6899	3.5022	0.436883	0.00795187	0.180559
C11orf84	ENSG00000168005.4	32.8958	36.5784	34.8732	29.7056	30.1079	24.3976	-0.36866	0.0062594	0.175955
SDCBP	ENSG00000137575.7	11.0262	8.283	5.7393	11.3011	12.0114	15.4787	0.539034	0.00689765	0.177306
F8A3	ENSG00000185990.6	0.8797	0.7036	0.7677	0.4823	0.5153	0.2475	-1.07244	0.00983707	0.189997
SH3BP2	ENSG00000087266.11	2.9777	2.7802	3.1232	2.5288	2.4401	2.6189	-0.358155	0.00723781	0.178099
SET	ENSG00000119335.12	53.5731	47.8921	45.8765	56.1546	57.1048	68.7557	0.325226	0.00520911	0.172479
FRMD8	ENSG00000126391.9	9.6503	10.1784	9.6705	8.5398	8.7347	7.6268	-0.393473	0.00728346	0.178138
CUL1	ENSG00000055130.11	22.0311	18.052	15.3217	23.5424	23.1368	29.3092	0.406821	0.00644091	0.176663
TMCO6	ENSG00000113119.8	3.2174	3.2407	2.7068	2.8109	2.5178	2.4445	-0.482329	0.00892439	0.186918
CCDC41	ENSG00000173588.10	0.337	0.4234	0.2096	0.5369	0.5513	0.7705	0.765674	0.0103806	0.191185
POGLUT1	ENSG00000163389.6	2.2636	2.0759	1.4311	2.6993	3.0443	3.467	0.457036	0.00821915	0.18318
HAS3	ENSG00000103044.6	3.8279	2.926	3.6943	3.0746	2.9443	2.6357	-0.49175	0.00828599	0.183753
FAM184B	ENSG00000047662.4	0.0133	0.0125	0.0146	0	0	0	-2.26625	0.00224773	0.162377
TMEM31	ENSG00000179363.6	0	0	0	0.2651	0.0708	0.1928	2.42954	0.002273	0.162377
FSD1	ENSG00000105255.6	15.7885	15.7194	15.826	14.4562	12.8951	12.5856	-0.366511	0.00709804	0.17771
MICALL1	ENSG00000100139.9	11.8291	12.9379	13.5822	10.6567	10.7309	10.3073	-0.338164	0.00660294	0.177029
CYGB	ENSG00000161544.5	32.3416	28.3939	30.734	28.5697	23.3252	21.9855	-0.379574	0.00644719	0.176663
SNAI2	ENSG00000019549.4	17.4353	15.227	16.4887	21.2091	21.692	25.1728	0.352199	0.00714269	0.178099
DHX9	ENSG00000135829.12	27.1795	22.8822	17.6664	27.867	28.4262	39.8593	0.506659	0.00576307	0.173468
ZNF441	ENSG00000197044.6	0.2874	0.1738	0.0917	0.3049	0.4127	0.4926	1.07971	0.0104879	0.191185
CDC5L	ENSG00000096401.7	3.0219	2.8656	2.1159	3.5535	4.006	5.1491	0.454769	0.00802044	0.180805
EIF4E	ENSG00000151247.8	2.0431	1.9744	1.4887	2.3361	2.6759	3.2689	0.432743	0.00755327	0.179578
HIF3A	ENSG00000124440.11	0.6309	0.419	0.8262	0.3459	0.4312	0.4191	-0.817082	0.010222	0.190305
SLC43A3	ENSG00000134802.13	0.8889	0.8898	0.8052	0.5663	0.5911	0.7277	-0.644984	0.0106249	0.191185
ATP6V1D	ENSG00000100554.7	6.4502	5.9412	4.2095	7.2421	9.0124	9.0674	0.44263	0.00769717	0.179768
MGAT2	ENSG00000168282.4	16.7605	15.6698	14.0809	19.6579	20.5493	23.5102	0.345181	0.00707138	0.177381
FHOD1	ENSG00000135723.9	26.6094	28.881	27.5855	22.8644	24.0891	19.7947	-0.317731	0.00595044	0.174804
ZMAT5	ENSG00000100319.11	9.6921	10.3576	10.4023	8.9085	8.8817	7.5636	-0.429683	0.00766502	0.179768
CCT8	ENSG00000156261.8	27.8127	26.7089	17.6423	30.3631	32.6925	40.9507	0.493683	0.0063223	0.176444
MAP4K2	ENSG00000168067.7	11.5643	11.5816	11.5067	9.6895	10.4229	9.5806	-0.35831	0.00734643	0.178426
TRA2B	ENSG00000136527.13	7.7674	6.6063	6.5422	8.4176	8.7363	11.1054	0.388042	0.00634916	0.176623
ZNF197	ENSG00000186448.10	1.1642	0.9148	0.5932	1.4333	1.4173	1.7005	0.567813	0.00948286	0.188135
CLUAP1	ENSG00000103351.8	0.745	0.7144	0.645	1.1386	1.1307	1.1998	0.482283	0.00962848	0.188837
BCAM	ENSG00000187244.6	1.8456	2.0848	2.1439	1.7922	1.4518	1.6813	-0.542652	0.00931755	0.187457
ISYNA1	ENSG00000105655.14	18.2537	19.0634	17.6432	15.8252	16.3923	12.6348	-0.408822	0.00707166	0.177381
RDX	ENSG00000137710.10	7.4223	7.2289	4.7938	8.2182	9.1888	11.8722	0.495872	0.00710882	0.177813
CLDN4	ENSG00000189143.8	1.66	1.8994	1.6798	1.1722	1.5492	1.5948	-0.541173	0.00963866	0.188837
SCARB2	ENSG00000138760.4	39.4914	32.8405	29.5715	39.4438	40.6069	50.1607	0.386187	0.00550959	0.172479
EDC4	ENSG00000038358.10	13.2758	13.5244	14.0713	11.4363	11.9616	10.5031	-0.329253	0.00669889	0.177306
RECQL4	ENSG00000160957.8	8.5618	9.0788	8.5758	8.1012	7.2464	6.3423	-0.431952	0.00770835	0.179768
TGFBR3L	ENSG00000260001.2	4.1226	4.0016	3.4774	3.183	3.3673	2.7771	-0.554554	0.0101747	0.190305
ZNF711	ENSG00000147180.12	0.6194	0.3108	0.1917	0.6504	0.603	1.0014	0.955356	0.0110281	0.192309
GPX4	ENSG00000167468.12	207.55	235.288	219.363	196.554	190.326	162.909	-0.272929	0.00482946	0.172479
DHX37	ENSG00000150990.3	12.31	13.0265	13.8998	10.6017	11.6404	9.8322	-0.351212	0.00670679	0.177306
CD164	ENSG00000135535.10	13.4497	10.9292	8.4902	12.967	15.7127	18.667	0.488986	0.00655818	0.177029
GFPT1	ENSG00000198380.8	3.5775	2.4133	2.1403	3.7152	3.9118	4.7265	0.46025	0.00792782	0.180559
SYT7	ENSG00000011347.5	8.5837	7.7642	9.083	7.5061	6.6782	7.2215	-0.359957	0.0073862	0.178669
PPL	ENSG00000118898.11	1.277	1.0309	1.4158	1.1238	0.8386	0.9129	-0.599898	0.00964654	0.188837
ELMOD2	ENSG00000179387.5	2.0655	1.7374	0.9998	2.2645	2.6455	3.5929	0.61068	0.00896825	0.186918
CDC42EP2	ENSG00000149798.3	6.4978	7.5401	7.6925	6.3565	6.1616	5.2655	-0.513106	0.00878002	0.186377
HIPK2	ENSG00000064393.11	15.8122	13.6766	13.4129	16.0964	16.9157	21.7604	0.374648	0.00546031	0.172479
LTA4H	ENSG00000111144.5	6.5809	5.5418	5.3431	7.3924	7.5697	9.203	0.361031	0.00729866	0.178138
SNW1	ENSG00000100603.9	14.9665	12.8115	10.5001	17.0041	17.0041	21.966	0.412583	0.00766905	0.179768
ZNF423	ENSG00000102935.7	4.0883	3.4115	4.1002	3.5923	2.9563	3.1238	-0.417364	0.00790934	0.180559
NXN	ENSG00000167693.12	6.1068	6.498	6.6037	5.5138	5.7079	4.7725	-0.415602	0.00781223	0.179768
P2RX4	ENSG00000135124.10	1.8557	2.0485	2.051	1.7802	1.7	1.5136	-0.491115	0.00891733	0.186918
THAP5	ENSG00000177683.9	3.2204	2.7035	1.9595	3.5697	4.0328	5.5444	0.510823	0.00874152	0.186374
PVRL1	ENSG00000110400.6	10.9103	11.7787	12.1774	9.3614	10.2444	9.3788	-0.323166	0.00675443	0.177306
GSDMB	ENSG00000073605.14	0.1265	0.1116	0.0981	0.2283	0.2527	0.2135	0.933883	0.0107583	0.191185
SH3GLB1	ENSG00000097033.10	11.9267	10.4637	9.167	12.7934	13.2402	16.253	0.376977	0.00673702	0.177306
SELT	ENSG00000198843.8	15.8467	15.4015	13.0895	17.3034	19.7085	23.4407	0.376693	0.0069425	0.177306
MLST8	ENSG00000167965.13	20.0974	23.0542	22.2522	18.7749	18.3091	16.3504	-0.344635	0.00673264	0.177306
SLC37A1	ENSG00000160190.9	0.9237	0.7631	0.8091	0.5807	0.6886	0.7483	-0.542125	0.0104557	0.191185
TPPP3	ENSG00000159713.6	5.1275	4.2246	3.6947	4.1656	3.6043	2.9125	-0.542731	0.00946398	0.18804
TRIB3	ENSG00000101255.6	9.4355	9.7011	10.0567	8.0206	9.0953	7.5055	-0.429439	0.00820712	0.18318
SYTL2	ENSG00000137501.12	3.6195	2.737	2.3606	3.8696	3.9058	5.1695	0.441573	0.007661	0.179768
ZNF574	ENSG00000105732.9	7.3197	7.7124	8.2093	6.2981	6.6969	6.8073	-0.377383	0.0078995	0.180559
SSH3	ENSG00000172830.8	9.2957	9.5662	9.5506	8.2699	8.5113	7.1691	-0.41181	0.00797501	0.180559
NEURL1B	ENSG00000214357.4	3.96	3.302	3.4331	2.9596	3.1224	3.3205	-0.383805	0.00848308	0.184936
GALE	ENSG00000117308.10	13.7324	14.5978	13.6594	12.2741	12.4118	9.8052	-0.406979	0.00740885	0.178669
RPTOR	ENSG00000141564.9	13.4865	13.8015	14.6756	11.8362	11.9285	10.8215	-0.291621	0.00637578	0.17663
EEF1B2	ENSG00000114942.9	125.97	138.459	127.767	143.453	156.441	164.007	0.27339	0.00545166	0.172479
TUBB4B	ENSG00000188229.5	438.312	490.783	486.345	401.053	430.829	368.735	-0.206205	0.00412982	0.17075
MRPL4	ENSG00000105364.9	31.1008	34.4444	34.3896	27.8737	28.6704	25.2054	-0.304272	0.00639696	0.176663
CKAP2	ENSG00000136108.10	5.4302	5.5273	3.51	6.2507	7.3484	9.9998	0.530503	0.00822943	0.183255
CAND2	ENSG00000144712.7	1.9925	1.7553	1.6775	1.7177	1.5249	1.2126	-0.544758	0.00979955	0.189649
KRT15	ENSG00000171346.9	1.0211	1.1209	1.1152	0.7236	0.9264	1.0059	-0.5547	0.0101853	0.190305
C8orf4	ENSG00000176907.3	3.2655	3.3771	2.1372	4.3174	5.4574	5.2827	0.553525	0.0101827	0.190305
ZNF106	ENSG00000103994.12	4.3587	3.279	2.8999	4.4903	4.8235	5.8359	0.425062	0.00745858	0.178669
DHX29	ENSG00000067248.5	2.4855	2.6622	1.4935	3.1741	3.5772	4.6502	0.55631	0.00923789	0.186979
KIF20B	ENSG00000138182.10	0.7967	0.8455	0.3665	1.1376	1.0347	1.628	0.74732	0.0103789	0.191185
ILK	ENSG00000166333.9	55.8451	57.7733	58.7967	49.6478	48.6899	41.0243	-0.290124	0.00600181	0.175266
DTNA	ENSG00000134769.17	0.6056	0.4797	0.4436	0.8051	0.7095	1.0875	0.51154	0.00997918	0.190305
PTBP2	ENSG00000117569.14	0.2773	0.2631	0.1982	0.3846	0.3757	0.5752	0.61032	0.0109614	0.192301
FBXL15	ENSG00000107872.8	5.5674	5.9523	4.3645	5.0618	4.355	3.8787	-0.510357	0.00941981	0.187898
S100A3	ENSG00000188015.5	12.3051	13.8281	12.3569	10.1562	12.3645	9.7476	-0.511293	0.00957684	0.18839
C19orf48	ENSG00000167747.9	17.5591	18.6823	18.9535	15.5167	16.6125	13.3038	-0.387907	0.007479	0.178669
CCDC47	ENSG00000108588.9	11.7186	9.3234	7.9417	12.7523	12.4335	16.8886	0.439279	0.0074946	0.178669
PI15	ENSG00000137558.3	0.3075	0.3172	0.1352	0.3439	0.6197	0.7714	1.00283	0.01163	0.194232
SLA	ENSG00000155926.9	0	0	0	0.0126	0.0068	0.0306	2.42797	0.00279208	0.165863
SIGLEC15	ENSG00000197046.7	0.0489	0.0918	0.0672	0.0134	0.0143	0.013	-1.97313	0.00428023	0.17075
ZNF207	ENSG00000010244.12	7.2687	6.6904	6.5518	7.6736	8.6298	9.8024	0.332585	0.00649032	0.176822
ANKRD9	ENSG00000156381.4	8.8314	10.022	8.6842	7.4203	8.9686	6.6451	-0.496246	0.00901543	0.186918
BCL2L1	ENSG00000171552.8	46.7618	53.4596	55.2233	40.974	45.2777	36.8556	-0.323038	0.00625948	0.175955
KIF17	ENSG00000117245.8	2.5305	2.8066	2.4561	2.3641	2.2725	1.8418	-0.526205	0.00981198	0.189649
MZT2A	ENSG00000173272.9	5.0755	6.6142	5.2583	4.7394	4.7369	4.7087	-0.456419	0.00883995	0.186393
ZNF580	ENSG00000213015.4	20.8616	20.5912	22.421	18.0929	18.647	17.0335	-0.357626	0.00776896	0.179768
NEK1	ENSG00000137601.11	0.8002	0.5428	0.3555	0.8898	0.9774	1.1159	0.643101	0.0107635	0.191185
FJX1	ENSG00000179431.5	20.5064	22.3326	23.3625	16.9474	20.7407	15.9936	-0.409875	0.00762251	0.179768
POC1A	ENSG00000164087.3	11.9678	13.4255	12.8928	10.9737	11.405	9.8054	-0.432893	0.0085614	0.185756
GABARAPL1	ENSG00000139112.6	1.2717	0.9296	1.0658	1.855	1.856	1.8098	0.529591	0.0107556	0.191185
CAPRIN1	ENSG00000135387.15	30.498	24.4529	22.8329	30.0107	31.5525	41.6927	0.42676	0.00583529	0.174273
TOMM70A	ENSG00000154174.7	15.5968	13.2454	11.6623	17.4941	16.119	21.4052	0.396861	0.00705792	0.177368
RAPGEFL1	ENSG00000108352.7	1.8807	2.0526	2.1345	1.9437	1.4629	1.5566	-0.545188	0.00992745	0.190305
VPS9D1	ENSG00000075399.8	5.7648	5.8146	5.7986	5.5462	4.8585	4.0392	-0.49939	0.00914193	0.186918
EFCC1	ENSG00000114654.6	0.0598	0.014	0.0328	0	0	0	-2.32278	0.00294699	0.165863
CPNE2	ENSG00000140848.12	7.1029	7.2863	7.9755	6.192	6.6795	5.7998	-0.367399	0.00774635	0.179768
TNFRSF19	ENSG00000127863.11	5.5641	4.9745	4.7302	6.4976	7.8225	7.8026	0.366921	0.00835987	0.184475
FGFR4	ENSG00000160867.10	1.0664	1.0682	1.0716	0.7395	0.9397	0.8428	-0.572803	0.0111876	0.192551
IBTK	ENSG00000005700.10	3.1135	2.4273	1.4251	3.4467	3.4348	4.5374	0.565453	0.00865851	0.186038
WNK2	ENSG00000165238.12	0.8537	0.9068	0.9601	0.7568	0.7658	0.7727	-0.487911	0.00988498	0.190217
SON	ENSG00000159140.13	15.1311	11.4045	10.4007	15.1634	14.5544	17.982	0.41271	0.00614148	0.17557
SMTN	ENSG00000183963.14	6.4096	7.6249	8.3082	5.8466	6.3854	5.3109	-0.407004	0.00741697	0.178669
PPP1R14B	ENSG00000173457.6	235.392	255.834	250.375	204.358	223.338	183.772	-0.261215	0.00531474	0.172479
TUFT1	ENSG00000143367.11	6.1905	6.6572	7.3202	5.8501	5.3528	5.7178	-0.426466	0.00877848	0.186377
METTL12	ENSG00000214756.3	1.8517	2.0213	1.6096	1.212	1.7161	1.41	-0.577828	0.0111369	0.192551
FZD4	ENSG00000174804.3	0.4113	0.4136	0.5699	0.9085	0.7962	0.811	0.645268	0.0113238	0.192727
CETN2	ENSG00000147400.8	24.4261	26.4135	23.1034	29.0327	34.2064	39.8396	0.386466	0.00770274	0.179768
SLC12A7	ENSG00000113504.15	1.5182	1.4442	1.4507	1.3509	1.2545	0.9978	-0.547185	0.0105197	0.191185
RRM1	ENSG00000167325.10	11.3877	11.29	8.7398	13.3745	13.9461	16.2572	0.369552	0.00782438	0.179768
NOTCH1	ENSG00000148400.9	7.916	8.2286	8.6791	6.9451	6.8473	7.0121	-0.309516	0.00736301	0.178666
TAGLN2	ENSG00000158710.10	278.18	305.837	287.54	243.057	264.722	208.671	-0.264102	0.00473901	0.171576
NCOR2	ENSG00000196498.9	21.0599	21.6692	25.0179	18.3591	18.681	18.2697	-0.253271	0.0057135	0.173414
CTAG2	ENSG00000126890.13	7.269	8.5612	7.4032	5.8313	6.8025	6.4539	-0.525073	0.0107767	0.191185
DUSP8	ENSG00000184545.6	2.727	2.0026	2.4832	1.9862	1.9772	2.0369	-0.49295	0.0101959	0.190305
ARHGEF10L	ENSG00000074964.12	3.7523	4.1389	3.5994	3.6159	3.2067	2.7959	-0.449486	0.00874509	0.186374
ARC	ENSG00000198576.2	0.9153	0.9823	0.9816	0.7254	0.8398	0.5157	-0.703655	0.0119401	0.195516
OSBP	ENSG00000110048.7	9.8011	7.9276	8.7799	11.6331	10.7878	14.1563	0.375607	0.00773284	0.179768
ZNF763	ENSG00000197054.7	0.0434	0	0.0159	0.0634	0.0847	0.2305	2.45531	0.00492783	0.172479
ZNF763	ENSG00000267179.1	0.0595	0	0.0218	0.087	0.1162	0.3162	2.45531	0.00492783	0.172479
MZF1	ENSG00000099326.4	2.8416	2.8125	3.0431	2.6756	2.3967	2.3421	-0.446923	0.00938134	0.187857
CDH24	ENSG00000139880.15	11.332	10.207	11.4587	9.7075	9.3827	8.8989	-0.368605	0.0083197	0.184154
CLTC	ENSG00000141367.7	33.0584	25.107	20.1163	31.4194	32.877	41.0232	0.466091	0.00556384	0.172479
IL32	ENSG00000008517.12	6.5477	8.567	7.1951	5.3139	7.4771	4.4635	-0.613494	0.00932771	0.187457
CA12	ENSG00000074410.9	15.5335	14.548	15.8789	17.664	18.0928	20.3222	0.292862	0.00675895	0.177306
PTDSS2	ENSG00000174915.7	6.025	6.1696	5.8129	5.3019	5.3447	4.6572	-0.386632	0.00849124	0.184936
HYI	ENSG00000178922.12	3.8235	4.6845	5.0418	3.5399	3.7229	3.5039	-0.561859	0.0102133	0.190305
C6orf211	ENSG00000146476.6	3.3286	2.6625	1.6988	3.7704	4.1399	5.1809	0.55662	0.0104145	0.191185
GABBR2	ENSG00000136928.4	0	0	0	0.0161	0.0086	0.0311	2.32238	0.00309781	0.165863
BTBD2	ENSG00000133243.4	55.8213	58.4354	58.4411	50.9454	48.5007	42.8019	-0.258603	0.00574243	0.173414
PCDH9	ENSG00000184226.10	0.9951	0.8074	0.6659	1.2588	1.1882	1.7423	0.519349	0.0107907	0.191185
KTN1	ENSG00000126777.13	3.2375	2.8431	1.5078	3.3875	3.7606	5.1282	0.631182	0.007837	0.179768
CMTM6	ENSG00000091317.7	14.2819	12.475	9.8745	15.1116	16.7205	18.2536	0.383204	0.00767037	0.179768
TMEM68	ENSG00000167904.10	1.0644	0.9232	0.7603	1.3274	1.4263	1.7888	0.480666	0.0107259	0.191185
ARHGAP39	ENSG00000147799.7	4.8913	5.4673	4.6897	4.2555	4.4239	4.3307	-0.397865	0.00909785	0.186918
ZNF784	ENSG00000179922.5	4.876	4.8327	4.9586	4.0329	4.2844	4.296	-0.470798	0.0104724	0.191185
GNE	ENSG00000159921.10	4.7412	3.7373	4.0178	5.9822	5.4416	6.9694	0.390048	0.00884105	0.186393
GOLGA5	ENSG00000066455.8	7.3466	6.4376	4.4915	8.7283	8.6226	10.5341	0.433176	0.00902911	0.186918
C17orf53	ENSG00000125319.10	3.9399	3.6118	4.3294	3.4685	3.1573	3.3158	-0.493643	0.010281	0.190997
RABL6	ENSG00000196642.11	13.3118	13.6226	14.5261	11.105	11.9421	11.0823	-0.272744	0.00673883	0.177306
PPDPF	ENSG00000125534.5	214.189	213.622	225.243	176.389	187.826	174.287	-0.243412	0.00616203	0.17557
PIWIL1	ENSG00000125207.3	0.05	0.0313	0.0275	0.1554	0.0684	0.1506	1.56435	0.00807064	0.18138
RAB1A	ENSG00000138069.12	20.6152	15.6942	14.571	21.6609	21.7767	27.3846	0.401332	0.00783086	0.179768
RGL2	ENSG00000237441.5	12.6076	13.8333	12.331	11.2413	11.445	9.4244	-0.380309	0.0079777	0.180559
KIFC2	ENSG00000167702.7	8.0266	8.1386	9.0703	7.498	6.9919	6.6797	-0.398052	0.00862373	0.186038
LPHN2	ENSG00000117114.15	11.9993	9.2181	7.99	12.689	12.0962	17.3505	0.477922	0.00730133	0.178138
ACCS	ENSG00000110455.9	1.0123	0.9492	1.1788	0.878	0.7257	0.8431	-0.585315	0.0114728	0.193537
CASQ1	ENSG00000143318.8	0.0393	0.0922	0.0865	0	0.0231	0	-2.41791	0.00368934	0.167856
WDR75	ENSG00000115368.5	6.429	5.9956	4.2388	7.0772	8.0918	10.2127	0.460811	0.00860071	0.18596
NFYA	ENSG00000001167.10	7.3566	5.7392	5.9265	8.2809	8.9435	10.7158	0.387807	0.0088434	0.186393
ASNSD1	ENSG00000138381.5	6.4332	5.4222	4.0561	7.4386	7.784	10.6112	0.469907	0.00968661	0.189016
TONSL	ENSG00000160949.12	3.9299	4.1455	4.462	3.4019	3.7809	3.4764	-0.405337	0.00901016	0.186918
TCEAL8	ENSG00000180964.12	29.0656	27.7261	23.6676	34.2756	36.3308	42.4531	0.358981	0.00847526	0.184936
DAND5	ENSG00000179284.4	1.6604	1.8268	1.703	1.1408	1.6341	0.9177	-0.730654	0.0125085	0.197317
TFAP4	ENSG00000090447.7	2.8756	3.0478	2.9325	2.5332	2.6349	2.5747	-0.397504	0.00937188	0.187857
DNTTIP2	ENSG00000067334.9	2.5738	2.6685	1.6647	2.9509	3.8856	4.885	0.537241	0.00966423	0.188837
SCO2	ENSG00000130489.8	12.3856	14.1907	12.935	11.4165	12.01	10.0707	-0.471728	0.00980231	0.189649
ANAPC15	ENSG00000110200.4	14.0755	14.0281	14.5277	11.6159	13.0921	11.8123	-0.362711	0.00857048	0.185756
DDX21	ENSG00000165732.8	26.0376	22.1891	15.2043	26.0477	28.1843	38.9145	0.553365	0.00700801	0.177306
IARS	ENSG00000196305.13	16.8772	14.0015	12.0763	17.5388	17.2854	21.6923	0.39179	0.00699805	0.177306
SALL2	ENSG00000165821.7	10.8042	9.9613	11.2414	9.2821	9.2267	8.571	-0.341604	0.00814516	0.18229
ATP6V1G1	ENSG00000136888.6	41.9891	41.3949	41.1373	50.6579	51.9983	66.4223	0.356763	0.00789337	0.180559
EGFL7	ENSG00000172889.11	15.3657	16.1035	14.973	13.126	14.4096	10.1064	-0.470605	0.00874491	0.186374
EFHD2	ENSG00000142634.8	70.9662	79.8301	79.5878	59.1026	66.9859	60.1969	-0.281233	0.00658119	0.177029
CNBP	ENSG00000169714.12	62.9926	60.6069	50.4473	66.5094	73.1845	82.0267	0.34106	0.00699539	0.177306
TMF1	ENSG00000144747.10	1.6384	1.6477	0.8384	2.1186	2.11	2.9245	0.589958	0.0103473	0.191185
RBM38	ENSG00000132819.12	13.289	14.7189	15.8813	12.0905	12.6125	11.9472	-0.394468	0.00877036	0.186377
ARSA	ENSG00000100299.13	14.2764	15.2825	13.9924	12.4167	13.3384	10.62	-0.408119	0.00865345	0.186038
LARP1B	ENSG00000138709.13	0.836	0.6478	0.6931	1.1251	1.0674	1.41	0.478442	0.0110479	0.192309
POLR1B	ENSG00000125630.11	8.7009	8.5355	7.9793	10.3905	10.6897	12.2253	0.319631	0.00802483	0.180805
C1QL1	ENSG00000131094.3	25.6939	26.0357	27.0765	23.3633	23.3729	19.7591	-0.410972	0.00899585	0.186918
NIPBL	ENSG00000164190.12	1.3314	1.0277	0.6022	1.5752	1.4446	2.0087	0.578572	0.0100114	0.190305
TELO2	ENSG00000100726.10	12.6359	13.026	11.6375	10.6321	11.4221	8.6958	-0.410017	0.00839516	0.184936
NYNRIN	ENSG00000205978.5	4.3708	3.9115	4.5719	3.8397	3.5067	3.6341	-0.380311	0.00902122	0.186918
HEATR5B	ENSG00000008869.7	2.4886	1.5892	1.5029	2.8167	2.5512	3.751	0.503072	0.00977244	0.189649
DAB1	ENSG00000173406.11	0.4263	0.4366	0.5671	0.3752	0.2366	0.3756	-0.726539	0.0128082	0.197317
PDE4A	ENSG00000065989.11	3.9879	3.6896	4.5787	3.7041	3.0966	3.4711	-0.433579	0.00944161	0.18804
TRIM28	ENSG00000130726.7	164.965	170.925	171.912	146.964	153.617	124.647	-0.254447	0.00510556	0.172479
CREM	ENSG00000095794.15	1.5147	2.0145	1.6305	2.5928	2.9064	3.0885	0.489222	0.0105281	0.191185
ACADS	ENSG00000122971.4	2.2605	2.7273	2.21	2.041	2.0836	1.3073	-0.664822	0.0119831	0.1961
UGDH	ENSG00000109814.7	8.8025	6.8356	5.6196	8.9828	10.2107	12.5591	0.441506	0.00895675	0.186918
MBP	ENSG00000197971.10	0.2223	0.1907	0.2156	0.1011	0.1579	0.2061	-0.700908	0.0128132	0.197317
CHD9	ENSG00000177200.11	1.0082	0.8228	0.381	1.1171	1.2187	1.6017	0.683239	0.0102078	0.190305
KIFC3	ENSG00000140859.11	9.8084	10.6996	11.0728	8.6132	9.3336	8.0525	-0.341526	0.0079444	0.180559
RPS6KA4	ENSG00000162302.8	29.6539	33.3334	32.2174	26.1109	28.3756	23.0146	-0.331035	0.00738749	0.178669
NICN1	ENSG00000145029.7	6.6567	7.7634	7.8928	6.2933	6.7777	5.0308	-0.5226	0.00988562	0.190217
RASSF7	ENSG00000099849.10	3.5147	3.8751	4.3473	3.4467	3.29	2.215	-0.651254	0.0112551	0.192551
SRSF1	ENSG00000136450.8	37.6875	31.1737	28.28	38.069	39.846	50.9524	0.39774	0.00718742	0.178099
RSPO3	ENSG00000146374.9	0.0415	0.013	0.0304	0	0	0	-2.2081	0.00359875	0.167856
KRT80	ENSG00000167767.9	6.4754	6.2235	6.7821	5.8127	5.7253	4.9145	-0.424978	0.00949734	0.188135
FAM58A	ENSG00000147382.14	18.9099	21.2674	19.0432	16.3735	18.5116	14.681	-0.426778	0.00922331	0.186979
MEX3D	ENSG00000181588.15	22.5159	23.5881	23.1639	18.8107	21.1863	18.1863	-0.337621	0.00825103	0.183433
CRISPLD2	ENSG00000103196.7	4.278	3.8921	3.7049	6.3022	5.7761	5.1343	0.38625	0.00890741	0.186918
ARHGAP23	ENSG00000225485.3	21.7317	22.5035	22.782	18.9429	19.0774	17.2254	-0.265267	0.00689606	0.177306
ZNF30	ENSG00000168661.10	0.5131	0.436	0.2995	0.9668	0.6011	0.8862	0.830837	0.0135643	0.200647
BAG6	ENSG00000204463.8	84.975	91.008	92.1287	78.661	79.9479	70.4236	-0.227598	0.00559276	0.172479
USP40	ENSG00000085982.9	3.925	3.72	3.5218	4.9121	5.0229	5.3321	0.323737	0.00882742	0.186393
MUT	ENSG00000146085.7	2.5006	2.0585	1.5481	3.0119	2.9709	4.1551	0.493916	0.0111285	0.192551
HMGCR	ENSG00000113161.11	4.2278	3.4529	2.4668	4.7439	4.7623	6.1644	0.45509	0.0095362	0.188381
ABCA7	ENSG00000064687.8	2.1257	1.8796	1.775	1.7537	1.7815	1.4987	-0.4441	0.0104311	0.191185
SLU7	ENSG00000164609.5	3.8972	3.6867	2.5505	4.5672	5.4181	5.6886	0.426316	0.00985695	0.190217
LRRC20	ENSG00000172731.9	10.4231	11.2159	11.4945	9.8223	9.4201	8.7174	-0.387779	0.00908068	0.186918
SPAG9	ENSG00000008294.16	4.321	3.6923	3.0278	4.798	4.7257	6.0411	0.393951	0.00850746	0.185139
ATPAF2	ENSG00000171953.11	3.8839	3.5453	3.616	3.2956	3.2528	3.2116	-0.392971	0.0100638	0.190305
LMF1	ENSG00000103227.14	1.1672	1.1681	1.1716	1.0213	1.0585	0.8052	-0.537008	0.0114798	0.193537
OGG1	ENSG00000114026.17	4.1175	4.2247	4.1702	3.8126	3.5132	3.455	-0.370012	0.00920492	0.186979
UTP14C	ENSG00000253797.2	1.5921	1.3883	1.0409	1.728	2.2942	3.0881	0.554146	0.011229	0.192551
TFPI2	ENSG00000105825.7	12.0816	9.0037	9.0081	13.862	15.0063	14.457	0.373281	0.00930928	0.187457
PTPLAD1	ENSG00000074696.8	20.987	16.9728	16.0492	21.8327	22.6492	28.3771	0.387145	0.00776028	0.179768
PDE5A	ENSG00000138735.11	2.1609	1.747	1.1055	2.3296	2.4841	3.5146	0.543426	0.0100132	0.190305
CCDC126	ENSG00000169193.7	1.153	0.9649	0.4496	1.8758	1.1765	2.0688	0.832767	0.012875	0.197317
ZNF257	ENSG00000197134.7	0.0525	0.041	0.0577	0.0864	0.1846	0.2232	1.45067	0.0105679	0.191185
BBX	ENSG00000114439.14	2.9275	2.4288	1.5148	3.0553	3.382	4.4467	0.53748	0.00927092	0.187082
ANKS3	ENSG00000168096.10	2.2643	2.2771	2.0403	2.0047	1.91	1.9012	-0.408261	0.0104815	0.191185
LZTFL1	ENSG00000163818.12	1.3935	1.2035	0.8127	1.7758	1.8689	1.9294	0.481791	0.0112335	0.192551
UHRF1BP1L	ENSG00000111647.8	1.9957	1.759	1.25	2.3485	2.4472	3.7333	0.519511	0.010714	0.191185
C19orf55	ENSG00000167595.10	5.2442	5.2759	6.0761	4.5753	4.7017	4.8642	-0.378981	0.00941363	0.187898
SHANK3	ENSG00000251322.3	3.5257	2.9764	3.1664	2.928	2.7857	2.7762	-0.385261	0.00997532	0.190305
KPNA2	ENSG00000182481.4	66.2572	55.9226	57.8676	66.2653	70.6455	82.9951	0.314153	0.00672983	0.177306
ART4	ENSG00000111339.6	0.0084	0.0158	0.0093	0.0555	0.0396	0.0718	1.83196	0.0059319	0.174804
DHRS13	ENSG00000167536.9	4.0514	4.2194	4.0906	3.7371	3.6431	3.1779	-0.480779	0.0111875	0.192551
AZI2	ENSG00000163512.9	2.3777	2.106	1.6302	2.9185	2.9887	3.6618	0.413329	0.0105598	0.191185
DUSP23	ENSG00000158716.4	25.6073	30.9138	26.7322	24.1564	25.2506	19.0517	-0.499919	0.0101881	0.190305
PKN3	ENSG00000160447.6	3.7036	3.7172	4.0554	3.4171	3.3306	2.98	-0.485876	0.0111201	0.192551
PARD6B	ENSG00000124171.4	0.2328	0.0699	0.1535	0.3063	0.2509	0.4256	1.09883	0.0136676	0.200761
IDH3G	ENSG00000067829.14	31.8807	32.8167	34.9614	28.1336	28.5408	26.928	-0.304701	0.00808035	0.181445
CYLD	ENSG00000083799.13	1.297	1.2416	0.8805	1.6044	1.6786	2.0353	0.421039	0.0103983	0.191185
SLC27A5	ENSG00000083807.5	1.3492	1.7639	1.2234	1.3349	1.1823	0.921	-0.588664	0.0114413	0.193537
CEP97	ENSG00000182504.6	0.6544	0.5834	0.3697	0.7529	0.8963	1.1364	0.5717	0.0122333	0.19688
MYO1B	ENSG00000128641.13	7.3316	5.6962	4.2643	7.3443	7.9021	9.6533	0.464882	0.00845226	0.184936
FADS2	ENSG00000134824.9	28.88	28.554	31.7661	25.7552	25.1972	23.1985	-0.240542	0.00634048	0.176564
ZNF449	ENSG00000173275.8	0.7184	0.3174	0.3267	0.7605	0.7546	0.9391	0.750507	0.0136578	0.200761
ARRDC1	ENSG00000197070.9	4.5729	4.871	4.8858	4.3317	4.2374	3.5381	-0.47043	0.0106754	0.191185
ARHGAP5	ENSG00000100852.8	2.656	2.3009	1.195	2.8987	3.1922	3.9659	0.578363	0.00981095	0.189649
ERLEC1	ENSG00000068912.9	20.3762	15.6826	13.0613	21.3719	21.5246	28.5148	0.439311	0.0088712	0.186561
LRSAM1	ENSG00000148356.9	5.4852	6.9679	7.6563	5.3727	5.4222	5.1226	-0.489237	0.00997788	0.190305
PRR24	ENSG00000257704.2	41.2815	40.8251	42.7082	35.8165	37.842	33.3257	-0.377793	0.0096115	0.18877
IMPAD1	ENSG00000104331.4	15.5615	12.6077	11.1899	15.9238	16.1603	20.4819	0.400144	0.00769406	0.179768
MAP1LC3A	ENSG00000101460.8	14.4877	15.6454	12.5714	12.8989	12.5836	10.6195	-0.443434	0.0101963	0.190305
TESK2	ENSG00000070759.12	0.2162	0.2863	0.3914	0.6834	0.4471	0.649	0.894615	0.0143505	0.204122
CNIH1	ENSG00000100528.7	37.923	37.3964	32.5683	42.6094	47.3687	51.3066	0.321097	0.00846069	0.184936
HOOK1	ENSG00000134709.6	0.1029	0.0965	0.0707	0.1974	0.1808	0.1709	0.925518	0.0138176	0.201347
DAW1	ENSG00000123977.5	0.8553	0.7317	0.808	1.1023	1.5471	1.6587	0.630904	0.0138603	0.201347
NEDD4	ENSG00000069869.11	1.7708	1.7329	1.1218	2.1854	2.2333	3.1213	0.485273	0.0107095	0.191185
WDR90	ENSG00000161996.13	1.9763	2.1038	1.7768	1.8461	1.6398	1.6253	-0.41898	0.0106414	0.191185
CHST4	ENSG00000140835.8	0.033	0.0155	0.0544	0	0	0	-2.2098	0.00423847	0.17075
ATP6V1E1	ENSG00000131100.8	31.0637	33.5851	30.4008	35.9805	41.6747	40.9678	0.298033	0.00783691	0.179768
NSUN6	ENSG00000241058.1	1.6414	1.1811	1.1535	2.0298	2.0348	2.7791	0.573323	0.0135626	0.200647
CBWD2	ENSG00000136682.10	0.8105	0.7054	0.5414	1.0687	0.962	1.4414	0.512386	0.0123862	0.196983
RIPK4	ENSG00000183421.7	3.2594	2.6693	3.117	2.6576	2.731	2.2035	-0.497812	0.0115288	0.193537
VAPA	ENSG00000101558.9	8.6543	7.3783	7.2546	8.9482	9.8917	11.0922	0.328629	0.00798022	0.180559
STARD7	ENSG00000084090.9	30.3123	26.6178	29.2771	33.332	34.4381	35.1848	0.268032	0.0075711	0.179578
PLK3	ENSG00000173846.8	11.816	12.5264	12.2891	10.6662	11.0716	8.8206	-0.410122	0.00953848	0.188381
SHOC2	ENSG00000108061.7	2.6707	2.6625	1.6474	3.1894	3.6291	5.2234	0.542681	0.0113319	0.192742
ADORA1	ENSG00000163485.11	0.5251	0.7188	0.6578	0.2878	0.6152	0.3125	-0.890695	0.0146015	0.204796
CAMSAP2	ENSG00000118200.10	5.4839	4.7228	3.2214	5.7208	6.4645	7.8315	0.460807	0.00939285	0.187898
TNK2	ENSG00000061938.12	5.8439	5.8668	6.122	5.2111	5.1714	4.617	-0.32967	0.00882061	0.186393
TNKS2	ENSG00000107854.5	5.0396	4.0216	3.2206	5.3059	5.7786	7.4153	0.436451	0.00990629	0.190217
TPM1	ENSG00000140416.15	71.9545	60.6939	67.6116	74.8661	74.9219	88.2709	0.299283	0.00552715	0.172479
RRAS	ENSG00000126458.3	70.1926	72.7889	62.5815	60.318	59.3426	42.7058	-0.434279	0.00864053	0.186038
BPGM	ENSG00000172331.7	3.6229	3.6896	2.6096	5.1124	4.7319	6.4116	0.463034	0.0117612	0.195017
HNRNPH2	ENSG00000126945.8	14.5125	11.547	8.9201	16.4321	15.5178	19.8226	0.422084	0.00991238	0.190217
DGAT2	ENSG00000062282.10	0.2394	0.3185	0.3243	0.1526	0.2218	0.1894	-0.801055	0.0147553	0.205127
GIPC3	ENSG00000179855.5	2.0915	2.3704	2.7334	1.8589	2.1648	1.6079	-0.597592	0.0121074	0.196744
ZHX2	ENSG00000178764.6	0.6349	0.5603	0.7284	0.4402	0.3938	0.5259	-0.67132	0.0144573	0.204485
FBXW2	ENSG00000119402.12	4.4822	3.8143	3.5168	5.0169	4.981	6.0929	0.347557	0.00912066	0.186918
RASA4	ENSG00000105808.13	1.2161	1.1083	1.1865	1.0654	0.7989	1.0932	-0.494139	0.0123041	0.19688
LARS	ENSG00000133706.13	10.4637	8.576	6.5832	11.2106	10.5757	14.6191	0.466973	0.00843308	0.184936
PRMT10	ENSG00000164169.8	1.0842	0.8009	0.5776	1.2367	1.283	1.9205	0.644089	0.013641	0.200761
RHBDF1	ENSG00000007384.11	7.666	6.5573	7.0689	6.4005	6.2838	5.3433	-0.394611	0.00991163	0.190217
COPA	ENSG00000122218.10	41.6044	31.5473	35.0935	43.6086	40.3937	47.3042	0.321725	0.00685836	0.177306
PPP1CB	ENSG00000213639.5	8.9324	7.3581	4.6853	9.0561	10.1426	13.9362	0.559076	0.0092411	0.186979
ZNF277	ENSG00000198839.5	1.2171	1.172	0.7109	1.5027	1.914	1.9812	0.585306	0.0132381	0.199573
EMILIN3	ENSG00000183798.4	0.3131	0.2827	0.2803	0.1653	0.1494	0.1725	-0.915575	0.014193	0.203595
NPM1	ENSG00000181163.9	101.224	98.9018	74.972	106.707	114.941	152.373	0.456112	0.00616679	0.17557
KLF16	ENSG00000129911.4	33.7619	37.0214	37.6566	31.3311	31.5771	25.4164	-0.346311	0.0082793	0.183753
MSMO1	ENSG00000052802.8	8.3399	9.0043	7.1911	10.9624	11.7141	12.8108	0.366448	0.0102049	0.190305
EPN1	ENSG00000063245.10	82.4451	81.3144	87.3922	72.8016	73.0384	63.4169	-0.242093	0.00664351	0.177306
GALK1	ENSG00000108479.7	11.7682	11.8766	10.6398	10.7492	9.9881	7.6535	-0.464215	0.0101483	0.190305
STARD13	ENSG00000133121.16	1.721	1.476	1.257	1.0067	1.3586	1.5113	-0.461932	0.0118222	0.195026
STOX2	ENSG00000173320.5	0.4662	0.309	0.2694	0.5199	0.5367	0.7475	0.579802	0.013497	0.200201
PIANP	ENSG00000139200.9	20.1601	18.524	24.4338	17.2569	17.2089	16.6576	-0.364969	0.00898641	0.186918
DHX15	ENSG00000109606.8	9.469	7.7966	5.7063	9.5717	10.1333	12.6318	0.451918	0.00870798	0.186324
THAP9	ENSG00000168152.8	0.0813	0.2001	0.1563	0.2451	0.3333	0.4211	1.12821	0.0145595	0.204796
C6orf136	ENSG00000204564.7	7.1484	6.8001	7.6725	6.5387	5.5264	6.6701	-0.443198	0.0114954	0.193537
FGF17	ENSG00000158815.6	0	0	0	0.0294	0.0314	0.0142	2.12818	0.00443594	0.170971
DDX47	ENSG00000213782.3	0.0349	0.0164	0.0864	0.1628	0.0818	0.1671	1.64772	0.010606	0.191185
MOB4	ENSG00000115540.10	2.008	1.8252	1.2721	2.5722	2.4606	3.4845	0.49212	0.0123051	0.19688
CLDN11	ENSG00000013297.6	0.664	0.4789	0.6575	0.304	0.4274	0.5429	-0.7088	0.0145449	0.204796
NRG2	ENSG00000158458.15	1.6175	1.6438	1.7455	1.3911	1.4185	1.3383	-0.511078	0.0129314	0.197615
GPR126	ENSG00000112414.10	5.6672	5.0313	3.3734	5.6495	7.3332	8.5519	0.503353	0.00942747	0.187911
MCEE	ENSG00000124370.6	0.9756	0.6099	0.8934	1.5154	1.3335	1.6707	0.735056	0.0151808	0.206228
STX10	ENSG00000104915.10	42.7628	48.3226	44.7557	39.3612	38.8737	32.8181	-0.35604	0.0088159	0.186393
KIF1C	ENSG00000129250.7	30.5164	29.821	32.3442	26.4724	25.4813	25.3303	-0.236851	0.00700595	0.177306
NEK7	ENSG00000151414.10	10.9209	10.8043	6.6749	11.4016	13.9697	17.3896	0.515215	0.00905134	0.186918
ADAMTS7	ENSG00000136378.10	3.2625	2.8455	3.2535	2.8778	2.6616	2.5417	-0.411217	0.010809	0.191238
PNKD	ENSG00000127838.9	15.019	15.0378	15.1978	13.5343	12.7318	11.6586	-0.320433	0.00887225	0.186561
CLDN15	ENSG00000106404.9	5.9028	4.9927	5.8846	4.737	4.9193	4.9641	-0.424151	0.0115317	0.193537
WNK3	ENSG00000196632.6	0.2269	0.1731	0.1268	0.3458	0.2388	0.3802	0.699981	0.0148773	0.205649
PSMC1	ENSG00000100764.9	16.2359	15.6785	11.5722	19.1235	18.1917	22.8179	0.387278	0.00923587	0.186979
GTF2H4	ENSG00000213780.6	0.0187	0.0351	0.0411	0	0	0	-2.10196	0.00463938	0.170971
TAGLN	ENSG00000149591.12	77.1148	75.4567	71.0831	69	59.4357	49.1076	-0.323954	0.00695652	0.177306
C1orf35	ENSG00000143793.8	8.9803	9.2442	8.3301	7.6168	8.0793	7.3295	-0.355055	0.0100622	0.190305
ALDOC	ENSG00000109107.9	4.6598	4.1156	4.3111	4.4002	3.5749	2.9716	-0.524737	0.0120821	0.196744
OSBPL7	ENSG00000006025.7	3.4824	3.686	3.9077	3.3114	3.0128	3.2386	-0.407127	0.0108818	0.191785
FAM69B	ENSG00000165716.5	8.9848	10.3629	9.3008	8.6908	8.3143	6.9545	-0.458586	0.0108294	0.191238
RPN1	ENSG00000163902.7	80.5979	83.8302	85.2436	94.5486	99.1061	89.9565	0.219093	0.00653752	0.177029
JSRP1	ENSG00000167476.6	4.435	3.673	3.5871	3.3321	3.5343	2.8953	-0.497796	0.0131806	0.199573
NUP160	ENSG00000030066.9	5.1645	3.722	3.123	5.2806	5.5819	6.4168	0.416436	0.009902	0.190217
SMARCAD1	ENSG00000163104.13	3.8135	3.1247	1.8003	4.1429	4.3616	5.6538	0.537232	0.0108954	0.191803
SERINC3	ENSG00000132824.9	21.7573	17.9156	18.4658	24.39	22.6272	27.6497	0.331474	0.00842309	0.184936
SLTM	ENSG00000137776.12	3.1996	2.8028	1.8736	3.5731	3.7549	4.8459	0.458422	0.0106649	0.191185
RGS10	ENSG00000148908.10	12.0226	12.7892	11.7047	10.098	11.2847	10.9848	-0.416014	0.0118159	0.195026
HDAC2	ENSG00000196591.7	3.8459	3.211	2.3398	4.1603	4.0054	5.3765	0.451603	0.00937009	0.187857
GNB1L	ENSG00000185838.9	0.7936	1.0807	0.9897	0.8079	0.7158	0.6694	-0.607591	0.0136506	0.200761
WISP2	ENSG00000064205.6	0.0088	0.0083	0.0097	0.0484	0.0621	0.0376	1.83335	0.0065606	0.177029
TMED7	ENSG00000134970.13	10.9071	8.0226	5.912	10.9669	11.2953	16.8183	0.535679	0.0100021	0.190305
SLC29A2	ENSG00000174669.7	3.0582	2.8827	3.5206	2.6433	2.7109	2.3217	-0.542455	0.0130686	0.198411
DESI2	ENSG00000121644.14	10.3478	8.32	7.5616	11.2411	11.1533	13.9676	0.372348	0.00954024	0.188381
DBP	ENSG00000105516.6	2.0715	2.0495	2.2172	1.9983	1.7887	1.5941	-0.484623	0.012101	0.196744
CCDC11	ENSG00000172361.5	0.5944	0.5128	0.5487	0.9646	1.0307	1.0362	0.747027	0.0157298	0.207807
C22orf26	ENSG00000182257.5	0.6562	0.3809	0.309	0.1713	0.3112	0.1827	-1.08997	0.0150608	0.206187
RNF5	ENSG00000204308.6	25.2055	26.2396	25.709	22.462	22.7153	21.134	-0.330309	0.00971576	0.189016
KIAA1024	ENSG00000169330.4	0.3107	0.2245	0.2489	0.4825	0.4019	0.4747	0.64384	0.0154322	0.206913
SPICE1	ENSG00000163611.7	0.6762	0.5093	0.4141	0.7778	0.8311	1.1251	0.54362	0.0138409	0.201347
ZNF563	ENSG00000188868.9	0.1237	0.1594	0.051	0.2712	0.2536	0.2958	1.2677	0.012939	0.197618
BOP1	ENSG00000170727.7	5.2513	6.2167	5.7837	5.0607	5.0847	4.6129	-0.442318	0.0113489	0.19291
GPR68	ENSG00000119714.6	0.8459	0.9064	0.8705	0.5447	0.7079	0.6422	-0.651746	0.0154079	0.206794
GAS2L3	ENSG00000139354.6	1.1236	0.8133	0.6787	1.2463	1.3549	1.746	0.506893	0.0132096	0.199573
SRSF11	ENSG00000116754.9	5.7164	4.6541	4.0565	6.2389	6.1314	8.8955	0.442602	0.00971255	0.189016
PPP2CA	ENSG00000113575.5	11.6543	10.308	9.5088	12.3513	13.6629	16.287	0.351165	0.00916655	0.186918
C1orf159	ENSG00000131591.13	3.1676	3.2835	3.2666	3.0073	2.765	2.7378	-0.409575	0.0114146	0.193536
TMTC3	ENSG00000139324.7	1.9102	1.8812	1.0099	2.1667	2.5898	3.8945	0.62627	0.0118194	0.195026
SEMA4G	ENSG00000095539.11	6.2337	5.2401	6.3068	5.3922	4.7608	5.0136	-0.388004	0.0106879	0.191185
C1orf229	ENSG00000221953.2	0.5068	0.6397	0.7711	0.3206	0.3882	0.3522	-0.927069	0.0156307	0.207442
BZRAP1	ENSG00000005379.11	0.348	0.3191	0.3017	0.3349	0.1903	0.1726	-0.711282	0.0150986	0.206187
CTH	ENSG00000116761.7	1.2033	1.0941	1.0418	1.7591	1.7729	2.1316	0.547261	0.0148639	0.205597
PFKP	ENSG00000067057.12	65.5676	66.2927	72.5412	53.1228	61.0282	55.1712	-0.2393	0.00693039	0.177306
KIF18A	ENSG00000121621.6	0.8014	0.6896	0.2487	1.2301	0.8837	1.2927	0.901596	0.0149312	0.206093
AKAP8L	ENSG00000011243.13	8.0645	7.8135	8.4049	7.1608	6.6674	7.2272	-0.337534	0.0102249	0.190305
TCN2	ENSG00000185339.4	2.5376	2.6437	2.4631	2.2412	2.2132	2.0078	-0.488411	0.0133699	0.199981
NCOA7	ENSG00000111912.14	5.1349	4.2267	3.2879	5.7731	5.4189	7.874	0.455333	0.0103923	0.191185
NAA10	ENSG00000102030.11	7.6758	8.2937	7.5473	6.9807	7.0571	5.8301	-0.400567	0.0104524	0.191185
RBM24	ENSG00000112183.10	0.6645	0.4314	0.337	0.8267	0.9882	0.8014	0.744369	0.0157858	0.207807
ZNF230	ENSG00000159882.8	0.3005	0.2424	0.192	0.4291	0.393	0.4679	0.676869	0.0158705	0.207973
NOVA1	ENSG00000139910.15	0.3067	0.2383	0.2166	0.4563	0.3593	0.5029	0.588142	0.0151153	0.206187
PRPF40A	ENSG00000196504.11	4.7262	3.8646	2.3989	4.7971	5.2667	7.2552	0.553331	0.010118	0.190305
SSFA2	ENSG00000138434.12	6.7705	5.4956	3.8865	6.9244	7.1302	9.8225	0.493925	0.00950191	0.188135
LRRC17	ENSG00000128606.8	40.408	36.2526	30.1146	40.1699	47.2635	59.8642	0.436214	0.00855265	0.185756
CDH6	ENSG00000113361.8	0.0107	0.0167	0.0117	0	0	0.0076	-2.28238	0.00594428	0.174804
ZNF285	ENSG00000267508.1	0.1025	0.1322	0.0352	0.1475	0.2027	0.2928	1.21462	0.0155904	0.207271
MAP3K6	ENSG00000142733.10	4.9782	5.318	5.1285	4.6588	4.6138	3.7982	-0.441989	0.0112723	0.192551
MAMDC4	ENSG00000177943.9	0.4186	0.4454	0.4335	0.3619	0.2452	0.2824	-0.696073	0.0160651	0.207973
ZNF33A	ENSG00000189180.11	1.272	0.993	0.6761	1.4595	1.5041	1.8991	0.508557	0.0130751	0.198411
SNAPC4	ENSG00000165684.3	9.0397	9.6128	10.5223	8.1869	8.3161	8.1699	-0.351039	0.0101578	0.190305
ACRBP	ENSG00000111644.3	0.0464	0.029	0	0.1018	0.127	0.0987	2.10379	0.00780581	0.179768
HIST2H3D	ENSG00000183598.3	0.3213	0.502	0.4707	0	0.1255	0.1138	-2.07785	0.00644654	0.176663
PLEKHA2	ENSG00000169499.10	9.1281	8.2589	8.7386	10.2596	11.1914	12.9185	0.324907	0.0095918	0.188521
HSPA9	ENSG00000113013.8	35.0915	27.7178	25.9279	34.0147	36.4234	45.9123	0.404218	0.00811824	0.181839
SWT1	ENSG00000116668.8	0.6188	0.8347	0.5726	1.2974	0.9539	1.3847	0.629481	0.0153464	0.206516
GNG12	ENSG00000172380.5	28.1927	27.5792	22.7283	28.6523	33.3461	42.6297	0.410039	0.00831564	0.184154
IFITM2	ENSG00000185201.12	102.505	97.1875	97.0613	86.282	79.8507	82.7487	-0.268636	0.00863142	0.186038
ZNF471	ENSG00000196263.3	0.3569	0.3164	0.1925	0.5122	0.4409	0.5862	0.686865	0.0160357	0.207973
C18orf54	ENSG00000166845.9	0.7461	0.5611	0.3409	0.7856	1.0645	1.1306	0.673331	0.015032	0.206187
PDE10A	ENSG00000112541.9	0.2628	0.2345	0.2329	0.3578	0.3675	0.5856	0.614049	0.0155445	0.207235
SLC39A4	ENSG00000147804.5	5.2644	5.9611	5.4485	5.254	4.682	4.1267	-0.439768	0.0113095	0.192607
ASPSCR1	ENSG00000169696.11	4.6388	4.6737	4.5298	4.0049	4.2284	3.4919	-0.352204	0.0100511	0.190305
FUZ	ENSG00000010361.9	8.3969	8.6145	8.4076	7.8325	7.4261	6.7212	-0.407847	0.0115057	0.193537
FAM173A	ENSG00000103254.5	11.1462	11.6315	10.4123	9.686	10.6989	7.9789	-0.457953	0.0118356	0.195116
ATAD3A	ENSG00000197785.9	28.3235	30.3092	30.5566	25.3772	26.6303	22.1319	-0.329701	0.00923413	0.186979
LYSMD3	ENSG00000176018.8	1.599	1.2957	0.4881	1.8181	2.0006	2.5493	0.821841	0.01419	0.203595
PEX1	ENSG00000127980.11	1.5589	1.3565	1.0845	1.7521	2.0891	2.7654	0.466322	0.0126146	0.197317
SYNGR1	ENSG00000100321.10	1.3625	1.3964	1.3092	1.3549	1.0246	1.044	-0.503293	0.0135792	0.200647
TCEANC	ENSG00000176896.7	0.3236	0.273	0.2844	0.4966	0.4833	0.5416	0.636838	0.016496	0.210534
CCDC25	ENSG00000147419.12	6.9693	6.7595	4.7289	8.1227	8.4575	10.5698	0.410695	0.0109292	0.192114
KLHL9	ENSG00000198642.5	4.4783	3.686	2.5749	4.9607	5.2557	6.0788	0.429461	0.0114673	0.193537
CCM2	ENSG00000136280.11	12.9793	12.875	14.4868	11.7398	11.2237	10.713	-0.290928	0.00902817	0.186918
AGO4	ENSG00000134698.10	0.7268	0.5168	0.4659	0.8699	0.8089	1.3067	0.563892	0.01471	0.205125
CGREF1	ENSG00000138028.10	5.6108	5.0241	5.1939	4.5242	4.5878	5.046	-0.362108	0.0118637	0.195219
LAPTM4B	ENSG00000104341.12	48.9549	44.147	45.4445	51.7259	54.9023	59.8159	0.278934	0.00823619	0.183255
TRMT1	ENSG00000104907.8	12.1545	13.7398	13.385	11.1312	11.772	10.4432	-0.370988	0.0106173	0.191185
ARMC6	ENSG00000105676.9	20.2622	21.8091	19.9684	17.7002	18.678	15.1646	-0.345911	0.0097784	0.189649
MAP6D1	ENSG00000180834.3	3.5824	3.9246	4.4387	3.2263	3.576	2.8168	-0.554054	0.0137971	0.201347
MRI1	ENSG00000037757.9	12.3276	12.5023	12.5948	11.0024	10.6678	10.8013	-0.330482	0.0107154	0.191185
FYTTD1	ENSG00000122068.8	3.6636	3.394	2.1154	3.9866	4.4399	6.1148	0.508295	0.0112303	0.192551
LANCL1	ENSG00000115365.7	6.8943	5.5768	3.8294	7.5954	7.2134	9.8027	0.471892	0.0109962	0.192309
HBP1	ENSG00000105856.9	2.6057	2.0079	1.5992	3.024	3.0852	3.5281	0.414819	0.0124722	0.197317
UBR3	ENSG00000144357.12	1.4989	1.1089	0.7712	1.5531	1.7509	2.3666	0.522854	0.0127226	0.197317
MMP15	ENSG00000102996.4	3.5656	3.1659	3.5351	3.1558	3.1155	2.4136	-0.489642	0.0128485	0.197317
MVB12B	ENSG00000196814.10	3.136	2.874	3.5359	2.7386	2.8689	2.4288	-0.437471	0.011814	0.195026
C1orf234	ENSG00000227868.2	0	0	0	0.1585	0.0847	0.1536	2.03674	0.00562719	0.172479
KIAA0430	ENSG00000166783.15	3.257	2.6879	2.7947	3.96	3.7557	4.325	0.33114	0.0108731	0.191757
POLK	ENSG00000122008.11	0.6912	0.7705	0.4515	0.8957	1.0137	1.4386	0.56585	0.0142096	0.203642
ZDBF2	ENSG00000204186.3	0.4195	0.301	0.1693	0.474	0.4764	0.6779	0.710955	0.015755	0.207807
DYNC1LI2	ENSG00000135720.8	6.8427	4.9853	4.0547	7.0359	6.8519	9.1941	0.455955	0.0103137	0.191185
C8orf82	ENSG00000213563.2	23.0109	24.519	22.2079	19.9224	20.9966	17.5362	-0.334957	0.00998594	0.190305
UBR1	ENSG00000159459.7	1.2679	1.0724	0.6918	1.3609	1.5945	2.3135	0.55467	0.0130467	0.198411
RCE1	ENSG00000173653.3	5.79	5.4565	5.1998	4.8818	5.0445	4.8575	-0.390325	0.0126932	0.197317
CEP290	ENSG00000198707.10	0.6102	0.4252	0.2468	0.683	0.6504	0.9458	0.66964	0.0149385	0.206093
PTGES3	ENSG00000110958.11	52.231	42.5506	43.7539	52.6067	53.9902	65.7019	0.33743	0.00833509	0.184232
RHBDL1	ENSG00000103269.9	0.9812	0.9419	0.7188	0.5379	0.5474	0.5711	-0.765	0.0173385	0.212609
USP33	ENSG00000077254.10	5.3314	4.2951	3.0481	5.4337	6.1045	7.4516	0.457809	0.0110966	0.192405
ACP6	ENSG00000162836.7	1.2292	1.3372	1.2558	1.1003	1.0857	1.1636	-0.435939	0.0134891	0.200201
FBLIM1	ENSG00000162458.8	28.4458	28.7198	30.1302	24.2807	25.7381	22.1296	-0.27994	0.00893125	0.186918
C6orf1	ENSG00000186577.7	11.5906	12.923	11.7818	10.651	11.2658	8.6254	-0.452884	0.0119046	0.195349
THUMPD3	ENSG00000134077.11	4.7253	3.8691	3.1101	5.1987	5.3438	7.2631	0.424849	0.0118228	0.195026
ROGDI	ENSG00000067836.8	11.03	11.4404	11.3195	10.6519	8.7503	9.5895	-0.359841	0.0110838	0.192309
CABIN1	ENSG00000099991.12	10.961	10.8622	12.1529	9.9768	9.2109	9.3179	-0.287143	0.00941507	0.187898
DDX1	ENSG00000079785.10	13.4332	11.082	7.7545	13.9947	14.6167	19.4738	0.475418	0.0106008	0.191185
TRPT1	ENSG00000149743.9	11.3716	10.9053	9.082	9.5417	9.6128	8.1492	-0.413317	0.0122681	0.19688
MT1M	ENSG00000205364.3	0.6541	0.3943	0.2567	0.2049	0	0.1986	-2.15937	0.0100642	0.190305
ZBTB45	ENSG00000119574.8	8.8849	9.8885	10.1171	7.8353	8.5688	8.3348	-0.37528	0.0116023	0.194185
ASAH1	ENSG00000104763.13	11.441	9.3795	7.2005	12.0278	12.6689	14.1512	0.389754	0.0104447	0.191185
STK38L	ENSG00000211455.3	1.9078	1.5444	0.9434	2.1823	2.2053	2.9131	0.52178	0.0133686	0.199981
RYR1	ENSG00000196218.7	0.0248	0.0181	0.0182	0.006	0.0097	0.0029	-1.6451	0.00994957	0.190305
XRCC3	ENSG00000126215.9	3.2262	3.9609	4.151	2.971	3.3243	3.0528	-0.444293	0.0119951	0.196177
PLA2G4A	ENSG00000116711.8	0.3368	0.2584	0.1346	0.6378	0.4842	0.4068	0.992467	0.0175716	0.213074
STAG2	ENSG00000101972.14	2.2579	2.0062	1.0043	2.334	3.0924	3.6454	0.606773	0.012689	0.197317
C21orf91	ENSG00000154642.6	0.5012	0.3376	0.3413	0.5804	0.7195	0.7203	0.595626	0.0167475	0.21167
GAS1	ENSG00000180447.5	41.1781	39.1363	34.1767	53.3086	48.7355	42.8723	0.319294	0.00911581	0.186918
SHCBP1	ENSG00000171241.4	3.1487	2.5729	1.9957	3.5495	3.897	4.7209	0.426552	0.0132322	0.199573
AGPAT2	ENSG00000169692.8	29.8395	33.258	30.2343	27.4819	28.0474	21.5942	-0.398382	0.0107256	0.191185
M6PR	ENSG00000003056.3	37.4871	36.1221	39.5544	43.259	43.2086	47.6086	0.263702	0.00872878	0.186374
C11orf54	ENSG00000182919.10	1.025	0.8229	0.594	1.1315	1.3983	1.5521	0.52177	0.0150834	0.206187
LCORL	ENSG00000178177.10	0.3598	0.3126	0.2266	0.4329	0.5346	0.5782	0.576277	0.0163607	0.209634
CIB2	ENSG00000136425.8	15.1358	15.192	15.6631	13.2891	14.3686	11.5748	-0.398928	0.0117495	0.195017
RAB37	ENSG00000172794.15	0	0.0081	0	0.0571	0.0508	0.0092	2.41421	0.00683854	0.177306
CELSR2	ENSG00000143126.7	2.7265	2.7771	2.9412	2.536	2.5011	2.1857	-0.385905	0.0116442	0.194232
PRPH	ENSG00000135406.9	1.4573	1.2051	1.3567	1.2316	0.9722	1.0864	-0.52191	0.0156497	0.207442
MTPN	ENSG00000105887.10	68.4498	54.3759	52.9892	66.4057	68.1323	86.2216	0.363372	0.00797262	0.180559
CCDC24	ENSG00000159214.8	3.2941	3.0887	3.0755	3.0549	2.5245	2.6719	-0.444828	0.0140122	0.202729
HMGN1	ENSG00000205581.6	28.6056	28.0515	24.7129	30.3789	32.8564	37.1333	0.308944	0.00877116	0.186377
C15orf26	ENSG00000156206.9	0.0445	0.0417	0.0244	0	0	0	-1.99758	0.00622011	0.17557
ABLIM3	ENSG00000173210.15	2.6837	2.9224	3.2842	2.4007	2.5582	2.6773	-0.42402	0.0126783	0.197317
CRYZ	ENSG00000116791.9	4.5296	4.1157	2.9272	5.309	5.6479	6.7858	0.408697	0.0127012	0.197317
SLC39A13	ENSG00000165915.9	16.6958	17.5023	16.5615	14.901	14.977	11.922	-0.35385	0.0102295	0.190305
COG3	ENSG00000136152.10	2.8736	2.3143	1.976	3.5468	3.1808	4.7219	0.439547	0.0132963	0.19966
IFT74	ENSG00000096872.11	1.4065	1.132	0.7599	1.5164	1.7852	2.6286	0.614322	0.015741	0.207807
TMEM158	ENSG00000249992.1	77.2952	90.5491	100.17	61.1897	78.5258	68.9942	-0.347483	0.00899323	0.186918
SYCE1L	ENSG00000205078.5	2.7596	2.09	2.7603	1.9395	1.7409	1.805	-0.630689	0.0174065	0.212827
TGFB1	ENSG00000105329.5	101.319	105.949	119.477	90.965	92.426	84.1671	-0.248599	0.00762124	0.179768
FAM135A	ENSG00000082269.12	0.3159	0.2066	0.1462	0.3327	0.3506	0.539	0.712035	0.0171687	0.212417
SYNGR2	ENSG00000108639.3	32.8744	36.1833	33.881	28.6163	30.6673	23.6535	-0.332296	0.00926022	0.187082
PORCN	ENSG00000102312.16	3.8882	3.8651	3.7586	3.3334	3.3223	3.5577	-0.417691	0.0141013	0.203206
ZNF319	ENSG00000166188.2	4.9017	4.683	4.6961	3.8725	4.7534	3.9949	-0.405994	0.0129204	0.19756
B3GNTL1	ENSG00000175711.4	1.7756	1.6349	1.8178	1.6176	1.4367	1.4934	-0.446919	0.0140931	0.203197
CDADC1	ENSG00000102543.10	0.5908	0.522	0.4619	0.8719	0.8918	0.9177	0.583549	0.0175762	0.213074
FOXS1	ENSG00000179772.6	2.3709	2.1605	2.5687	1.5377	2.2691	1.2067	-0.725101	0.0176526	0.213074
TMEM139	ENSG00000178826.6	0.103	0.0805	0.0566	0.0188	0.0201	0.0182	-1.73225	0.0085479	0.185756
MGMT	ENSG00000170430.9	1.9798	2.1116	1.9172	1.8857	1.6671	1.3414	-0.542693	0.0154898	0.207064
RWDD2A	ENSG00000013392.6	0.7984	0.7222	0.9599	1.2151	1.4415	1.6372	0.55734	0.0160702	0.207973
PPAP2C	ENSG00000141934.5	11.9288	15.4085	13.4438	11.0906	12.835	8.662	-0.519942	0.0122111	0.19688
SLA2	ENSG00000101082.9	0.0958	0.0449	0.0526	0.0175	0	0.017	-2.02225	0.00779134	0.179768
LFNG	ENSG00000106003.8	4.0462	4.3692	3.4423	3.4774	3.8076	2.7884	-0.491087	0.013986	0.202634
RANGAP1	ENSG00000100401.15	27.0457	30.2468	31.2512	24.0433	25.9092	21.5184	-0.293947	0.00909188	0.186918
TRIP12	ENSG00000153827.9	10.8127	8.6934	6.8817	10.6632	10.682	14.6718	0.456582	0.00929533	0.187368
ADCK2	ENSG00000133597.5	10.5008	12.7644	11.9707	9.8232	10.8862	7.8848	-0.476358	0.01206	0.196638
WDR54	ENSG00000005448.12	10.126	11.2694	10.0956	9.2966	9.7899	7.3439	-0.447117	0.0122905	0.19688
C10orf10	ENSG00000165507.8	2.556	1.607	2.0456	1.636	1.7655	1.4761	-0.571164	0.0160254	0.207973
IPO7	ENSG00000205339.5	15.5943	13.739	9.2923	15.3122	17.4939	23.5411	0.528492	0.0095709	0.18839
ADAMTS10	ENSG00000142303.9	0.2991	0.2733	0.4298	0.2522	0.1707	0.163	-0.855073	0.0185927	0.216949
RNFT2	ENSG00000135119.10	1.3307	0.9995	1.1006	0.8628	1.0309	0.9809	-0.488585	0.0156375	0.207442
SFRP1	ENSG00000104332.7	62.9333	57.5953	57.4534	66.4931	68.4083	69.1799	0.224949	0.00784458	0.179768
SLC25A23	ENSG00000125648.10	14.5109	13.8099	15.5474	12.8506	12.3842	12.0052	-0.307837	0.010601	0.191185
RAD21	ENSG00000164754.8	9.8943	8.0911	6.2017	9.8893	11.1255	12.9714	0.41482	0.0108053	0.191238
FBXO44	ENSG00000132879.9	7.1254	7.1608	8.3784	6.3892	6.5642	6.4326	-0.398101	0.0126024	0.197317
ZNF525	ENSG00000203326.5	0.2448	0.2123	0.1076	0.3287	0.3011	0.4162	0.798107	0.0186037	0.216949
SHPRH	ENSG00000146414.11	0.3045	0.2925	0.1618	0.3694	0.4093	0.5464	0.597644	0.0160224	0.207973
UBE2QL1	ENSG00000215218.3	2.4468	2.0649	2.3079	2.1238	1.6841	2.0697	-0.462862	0.0148658	0.205597
HSPD1	ENSG00000144381.12	53.655	45.4098	35.0341	52.0738	55.8879	71.5732	0.44857	0.00848452	0.184936
H2AFJ	ENSG00000246705.3	5.101	5.4019	4.4975	4.8031	4.2466	4.0439	-0.420958	0.0134381	0.200201
MITF	ENSG00000187098.10	0.3778	0.1943	0.1607	0.3474	0.4569	0.557	0.790435	0.0183042	0.216299
SMEK2	ENSG00000138041.11	3.4445	2.6923	1.9308	3.4476	4.0229	5.1015	0.473865	0.0124113	0.19711
EPHB6	ENSG00000106123.7	4.8081	5.3483	5.5273	4.1631	5.0745	3.9397	-0.439633	0.0125911	0.197317
TRAF2	ENSG00000127191.13	6.9955	7.6183	6.8639	6.3556	6.7239	5.2426	-0.43193	0.0126283	0.197317
CNN3	ENSG00000117519.11	70.3518	61.3847	64.1265	74.8975	72.4698	85.2567	0.28062	0.00863033	0.186038
ZSWIM2	ENSG00000163012.3	0.0183	0.0172	0	0.0603	0.1074	0.078	2.04944	0.00794057	0.180559
THAP7	ENSG00000184436.7	13.6517	13.0872	13.2712	11.632	12.376	10.5289	-0.361263	0.0119081	0.195349
ANKRD54	ENSG00000100124.8	9.4166	9.5836	9.6901	8.7862	8.1362	7.7773	-0.349049	0.011687	0.194582
ITPK1	ENSG00000100605.12	10.6933	11.2921	11.6365	9.7533	9.6012	9.1033	-0.303805	0.0105901	0.191185
EEFSEC	ENSG00000132394.6	11.9819	12.5154	12.8864	11.1402	11.4989	8.3997	-0.46225	0.0124928	0.197317
FAM222A	ENSG00000139438.5	15.9992	14.7244	17.3082	13.9759	13.1749	13.7622	-0.318887	0.0110816	0.192309
MROH6	ENSG00000204839.4	1.7673	1.8256	2.0737	1.6092	1.5207	1.5706	-0.502028	0.015475	0.20697
AAGAB	ENSG00000103591.8	10.2424	8.8501	8.5675	11.368	12.1477	15.2065	0.355692	0.0116349	0.194232
TMEM178A	ENSG00000152154.6	0.1069	0.0668	0.1175	0.0586	0	0.0189	-2.05542	0.00938268	0.187857
MPG	ENSG00000103152.7	50.4516	54.0886	48.1603	44.5358	44.8271	38.6115	-0.322694	0.0104659	0.191185
C1orf43	ENSG00000143612.14	87.173	87.5714	80.1324	98.9383	107.501	92.1081	0.250037	0.00841253	0.184936
USP34	ENSG00000115464.10	2.2753	1.9968	1.054	2.428	2.5604	3.5332	0.583892	0.0117779	0.195026
KIAA1211L	ENSG00000196872.6	0.0842	0.0351	0.0308	0.0103	0.011	0.0099	-1.79432	0.00927414	0.187082
SPIN1	ENSG00000106723.12	12.987	10.6572	10.413	14.7395	13.2844	18.2489	0.366944	0.0108244	0.191238
EHD1	ENSG00000110047.13	17.877	19.5803	19.3852	15.2769	17.2121	14.4534	-0.291246	0.00966238	0.188837
ACSL4	ENSG00000068366.15	5.4613	4.3552	3.3851	5.4234	6.3259	8.8818	0.492459	0.0121106	0.196744
ETF1	ENSG00000120705.8	22.6137	17.6967	15.0737	22.1712	23.6133	30.0132	0.424048	0.0100782	0.190305
CCDC92	ENSG00000119242.4	12.0229	12.291	13.5991	10.1345	10.465	11.3163	-0.301576	0.0106877	0.191185
ARHGEF39	ENSG00000137135.13	1.6193	1.5183	1.4816	1.3817	1.4447	1.1522	-0.47172	0.0151929	0.206228
SYAP1	ENSG00000169895.5	11.6512	10.9054	8.9449	12.8944	12.6619	16.5672	0.367268	0.0105795	0.191185
BCL2L2-PABPN1	ENSG00000258643.1	0	0	0	0.1559	0.0333	0.0302	2.17792	0.00717124	0.178099
ILDR2	ENSG00000143195.8	0.0053	0.005	0.0234	0	0	0	-2.16838	0.00725225	0.178099
ABCA13	ENSG00000179869.10	0.0024	0.0022	0.0104	0	0	0	-2.16838	0.00725225	0.178099
MAP2	ENSG00000078018.15	3.3888	2.7562	2.4184	3.7071	3.6401	5.1315	0.407663	0.0119198	0.195423
TMEM243	ENSG00000135185.7	2.2619	2.1714	1.9529	3.4689	3.8172	3.1911	0.4575	0.015318	0.206516
WDR18	ENSG00000065268.6	21.0812	22.1521	19.5881	18.1588	19.3416	15.7127	-0.361198	0.0115923	0.194185
RBP4	ENSG00000138207.8	0.0911	0.1709	0.2003	0.0666	0.0356	0	-2.07951	0.00940568	0.187898
PSPN	ENSG00000125650.4	2.4758	2.0787	1.9662	1.9494	2.0304	1.4473	-0.516719	0.0157284	0.207807
SERBP1	ENSG00000142864.10	31.1976	26.6933	22.5565	30.3633	32.15	41.3915	0.397594	0.00858505	0.185788
CEP350	ENSG00000135837.11	1.0464	0.8975	0.4904	1.1708	1.2475	1.7107	0.564243	0.0141534	0.203595
MEGF6	ENSG00000162591.11	0.1501	0.1348	0.0962	0.0548	0.1099	0.0266	-1.28464	0.0176812	0.213074
EIF3E	ENSG00000104408.5	12.4818	11.1607	7.5546	12.7205	14.0566	16.8887	0.440072	0.0107461	0.191185
CDC23	ENSG00000094880.6	5.5493	4.4254	4.191	6.4395	6.4455	7.5701	0.352996	0.0128654	0.197317
NPRL3	ENSG00000103148.11	9.0824	9.8282	10.7199	8.4016	8.5484	7.7906	-0.334512	0.0111784	0.192551
ZKSCAN1	ENSG00000106261.12	7.5171	5.714	4.6678	7.8386	7.2446	10.1788	0.447133	0.0107793	0.191185
HSD11B1L	ENSG00000167733.9	6.3001	6.4042	5.9687	5.7292	5.8117	4.803	-0.426502	0.0138168	0.201347
TMC4	ENSG00000167608.7	0.2887	0.4107	0.3719	0.2183	0.2683	0.127	-0.954385	0.019483	0.219775
FAM195B	ENSG00000225663.3	7.4113	8.4872	6.21	6.0252	7.224	5.2174	-0.469308	0.0130738	0.198411
UST	ENSG00000111962.7	1.9291	2.1977	1.8867	1.544	1.842	1.8146	-0.462232	0.0155592	0.207235
RCCD1	ENSG00000166965.8	4.3099	3.9414	4.6288	3.9377	3.5948	3.7231	-0.403737	0.0135727	0.200647
MCM2	ENSG00000073111.9	28.0481	29.1465	31.4036	24.7724	25.8923	22.3152	-0.28009	0.00971192	0.189016
NUP62CL	ENSG00000198088.6	0.2349	0.2863	0.3613	0.515	0.5503	0.7988	0.960143	0.0190129	0.218203
NUDT18	ENSG00000173566.9	6.1087	5.6809	5.2546	5.2427	5.0156	4.7364	-0.43356	0.0153536	0.206516
BAZ2B	ENSG00000123636.13	0.376	0.3424	0.1994	0.443	0.4582	0.7004	0.573154	0.0157724	0.207807
SS18	ENSG00000141380.9	8.0673	6.4796	5.5113	8.5945	8.6222	11.3327	0.395098	0.0117641	0.195017
UBA2	ENSG00000126261.8	26.5429	23.7364	21.0285	27.4935	30.0396	36.9222	0.364447	0.0103249	0.191185
PAK4	ENSG00000130669.13	14.4503	14.9408	15.2471	12.7246	13.5393	11.3168	-0.297208	0.0103276	0.191185
RANBP6	ENSG00000137040.8	1.9332	2.0923	1.0886	2.3937	3.0988	3.1997	0.549968	0.0152704	0.206509
LDB3	ENSG00000122367.15	0.0923	0.068	0.1376	0.0289	0.0695	0.021	-1.4882	0.015451	0.20695
ATXN7L2	ENSG00000162650.11	1.9348	1.7826	2.2093	1.6786	1.7148	1.5468	-0.496199	0.0154414	0.206934
THRAP3	ENSG00000054118.9	21.9691	18.1769	18.831	25.2582	22.1889	30.8961	0.373834	0.0101364	0.190305
SACS	ENSG00000151835.9	2.1646	1.8893	0.9289	2.2122	2.6042	3.4848	0.625126	0.0125062	0.197317
ITM2B	ENSG00000136156.8	77.5866	67.2932	68.9771	81.3507	80.1943	90.53	0.269066	0.00901527	0.186918
RBBP4	ENSG00000162521.14	15.2859	12.0362	12.4102	16.1273	15.235	17.6939	0.317458	0.00965231	0.188837
LLGL2	ENSG00000073350.9	0.6567	0.7149	0.5381	0.604	0.4303	0.4968	-0.546483	0.0175186	0.213074
NOTCH2NL	ENSG00000213240.7	0.2188	0.1347	0.0977	0.2474	0.2804	0.3198	0.82882	0.0198641	0.221318
C17orf80	ENSG00000141219.11	4.863	4.002	3.7044	5.9011	5.5425	7.0253	0.36341	0.0132948	0.19966
DMXL1	ENSG00000172869.10	0.7163	0.6595	0.3989	0.7853	1.0367	1.1782	0.52496	0.0153018	0.206509
KLHL13	ENSG00000003096.9	2.9182	2.5294	1.7107	3.4413	3.3303	4.2203	0.425356	0.0136578	0.200761
OSGIN1	ENSG00000140961.8	4.6557	5.7728	5.9407	9.358	9.2546	7.4765	0.487104	0.0133445	0.199953
METTL9	ENSG00000197006.9	13.9389	12.313	10.7247	15.1108	15.0403	17.0558	0.318142	0.0103907	0.191185
COPS2	ENSG00000166200.10	4.9269	5.689	3.6616	6.2223	6.8578	8.4088	0.427892	0.0129652	0.197861
GAL3ST4	ENSG00000197093.6	2.6949	2.867	2.4203	2.6421	1.9581	2.2446	-0.477217	0.015943	0.207973
PHTF2	ENSG00000006576.12	4.1611	3.2944	2.3143	4.2211	4.6599	5.8155	0.457955	0.012593	0.197317
FOXC2	ENSG00000176692.4	0.9153	0.9318	0.9196	0.5161	0.6434	0.5837	-0.761184	0.0200973	0.222199
TET2	ENSG00000168769.8	0.7454	0.4584	0.4345	0.826	0.7637	1.1188	0.501437	0.0151707	0.206228
CACNG4	ENSG00000075461.5	23.3736	19.9016	25.384	19.4588	18.688	18.7669	-0.325378	0.0111482	0.192551
ZNF616	ENSG00000204611.2	0.9269	0.7763	0.6724	1.2924	1.0859	1.6259	0.511995	0.017432	0.213034
SDHD	ENSG00000204370.4	15.2781	14.3449	9.691	17.2045	19.4031	20.551	0.399537	0.0126966	0.197317
SDHD	ENSG00000255292.2	27.2952	25.628	17.3136	30.7368	34.6646	36.7154	0.399537	0.0126966	0.197317
RABGGTA	ENSG00000100949.10	12.3409	12.8403	13.1381	11.8288	11.0109	9.6197	-0.375255	0.0122644	0.19688
INTS1	ENSG00000164880.11	54.1253	59.0618	58.5384	50.4185	51.7519	43.2708	-0.236183	0.00746717	0.178669
SLC7A14	ENSG00000013293.5	0.404	0.3512	0.3144	0.2953	0.2712	0.2728	-0.539571	0.0186566	0.216949
RAB10	ENSG00000084733.6	31.067	28.1752	25.4941	32.3335	34.5935	42.1537	0.340375	0.0101736	0.190305
C6orf223	ENSG00000181577.11	0.0449	0.0105	0.0123	0	0	0	-2.05445	0.00779372	0.179768
RPS6KC1	ENSG00000136643.7	3.9047	3.8169	2.538	4.6608	4.7099	6.2597	0.427404	0.0133481	0.199953
BGLAP	ENSG00000242252.1	0	0	0	0.1622	0.0433	0.0393	2.07324	0.0077576	0.179768
ATR	ENSG00000175054.10	0.8524	0.8025	0.5109	1.0812	1.0192	1.5199	0.491681	0.0152843	0.206509
NSUN5	ENSG00000130305.12	18.9123	21.1661	18.8272	16.0283	18.5623	14.1268	-0.368951	0.0115333	0.193537
SAMD4A	ENSG00000020577.9	2.1012	1.5938	1.5141	1.3322	1.3685	1.8412	-0.408008	0.0140413	0.202879
GBAS	ENSG00000146729.5	6.4644	6.3462	4.8527	7.5571	7.7012	9.7928	0.372544	0.012432	0.197299
MINK1	ENSG00000141503.11	13.0625	13.9321	15.1954	11.7472	12.1703	11.4778	-0.283785	0.0105475	0.191185
N6AMT1	ENSG00000156239.7	3.7092	3.7578	3.1812	4.8602	5.2783	5.5385	0.354079	0.0138712	0.201347
AKAP11	ENSG00000023516.7	2.8948	2.4104	1.2539	3.0959	3.2458	4.3273	0.56953	0.0133233	0.199876
ATF6	ENSG00000118217.5	7.3745	7.0402	6.6631	8.1097	9.169	10.4229	0.320034	0.0114669	0.193537
TBC1D19	ENSG00000109680.6	0.8075	0.8292	0.5211	1.2225	1.0211	1.5666	0.61977	0.0189439	0.217899
TOR1AIP1	ENSG00000143337.14	5.8272	4.7256	3.9838	6.0023	6.2906	7.9157	0.386387	0.0117959	0.195026
TTC17	ENSG00000052841.10	3.8302	2.9697	3.1117	4.3918	4.0487	5.3188	0.359199	0.0122842	0.19688
RABEP2	ENSG00000177548.8	7.3836	7.8271	6.9697	7.0279	6.3805	5.7167	-0.384852	0.0130556	0.198411
TSSC1	ENSG00000032389.8	10.9593	11.6266	11.599	9.8848	10.0984	9.0479	-0.314153	0.0116384	0.194232
MRPL37	ENSG00000116221.11	53.6663	55.4625	58.345	47.6095	47.9963	43.7815	-0.263013	0.0101215	0.190305
PRDX1	ENSG00000117450.9	159.567	162.552	144.203	179.385	197.277	172.67	0.2578	0.00880777	0.186393
PRDM4	ENSG00000110851.7	7.8314	6.652	6.9959	9.2933	9.2506	10.6151	0.319169	0.0125337	0.197317
GNL2	ENSG00000134697.8	4.995	4.6764	3.2748	5.8544	5.6724	7.5725	0.411758	0.0131785	0.199573
EIF5A	ENSG00000132507.13	320.224	349.686	356.658	294.357	317.409	271.923	-0.181682	0.00660797	0.177029
PTPRU	ENSG00000060656.15	4.9005	4.7181	5.0602	4.5229	4.4098	3.484	-0.420584	0.0132509	0.199573
TANK	ENSG00000136560.9	2.3588	1.9972	1.6384	2.811	2.8744	3.6725	0.402666	0.0150514	0.206187
RAD54L	ENSG00000085999.7	4.7411	5.0236	5.9928	4.7473	4.0776	4.5148	-0.457801	0.0148233	0.205414
ZBTB6	ENSG00000186130.4	2.0152	1.9297	1.013	2.515	2.6246	3.2356	0.550467	0.0163249	0.209571
MAPK10	ENSG00000109339.14	0.3273	0.2901	0.3055	0.5014	0.478	0.548	0.508682	0.0186434	0.216949
SARDH	ENSG00000123453.12	2.7758	3.1845	3.1758	2.9359	2.5634	2.1172	-0.504945	0.0149607	0.206093
MYSM1	ENSG00000162601.5	0.9799	0.711	0.5952	1.069	1.1192	1.6224	0.495426	0.0163444	0.209598
CHST15	ENSG00000182022.13	1.0988	0.848	0.9938	0.7599	0.6833	0.9523	-0.523152	0.0182196	0.215681
PPP6R3	ENSG00000110075.10	4.7747	3.9867	3.1631	4.9453	5.3835	7.3483	0.431204	0.0126415	0.197317
PRDM12	ENSG00000130711.3	0.1244	0.1	0.0781	0.078	0.0208	0	-2.03276	0.0112111	0.192551
GALNT14	ENSG00000158089.10	1.7058	1.5994	1.7473	1.5426	1.3774	1.3316	-0.486226	0.0169718	0.212308
CMTM7	ENSG00000153551.9	12.6723	13.8075	14.4409	11.2049	11.6571	12.1094	-0.325883	0.0123223	0.19688
SPTB	ENSG00000070182.13	0.2682	0.2794	0.3176	0.1535	0.2897	0.2059	-0.672717	0.0190007	0.218203
DCAF13	ENSG00000164934.9	6.9314	6.0126	3.9216	7.046	8.0873	10.1249	0.468442	0.0125886	0.197317
ATP2B1	ENSG00000070961.10	1.9894	1.7132	0.7848	2.1354	2.5426	2.8981	0.618552	0.0145991	0.204796
FAM198B	ENSG00000164125.11	7.1157	6.0593	4.5173	7.1096	8.101	10.2225	0.436077	0.0120214	0.196487
YPEL3	ENSG00000090238.7	4.9118	4.6964	5.4887	4.9908	3.9876	3.8235	-0.47606	0.0151489	0.206187
GNAI1	ENSG00000127955.11	11.1701	8.2863	6.5202	11.1748	11.7144	14.8968	0.439527	0.01239	0.196983
TSPAN18	ENSG00000157570.7	3.5684	3.0436	3.74	3.1315	3.0301	2.7648	-0.422451	0.0145581	0.204796
PLRG1	ENSG00000171566.7	5.7517	4.9281	3.7387	6.1725	6.8405	8.2774	0.3995	0.0134567	0.200201
TAF5	ENSG00000148835.9	1.3064	0.7324	0.8436	1.6242	1.4989	1.6891	0.572272	0.0188206	0.217098
PCYT1A	ENSG00000161217.7	7.0504	6.1142	6.6138	8.3408	7.8076	10.1497	0.334596	0.0118585	0.195219
ANKRD28	ENSG00000206560.6	3.591	2.8364	2.0716	3.6931	3.8366	5.1317	0.451169	0.0128751	0.197317
SCYL3	ENSG00000000457.9	1.4658	1.2004	1.0129	1.7685	1.8298	2.1838	0.410053	0.0160643	0.207973
SLCO4A1	ENSG00000101187.11	1.206	1.4568	1.9699	1.2388	0.9928	1.1086	-0.670866	0.018149	0.215071
NFKB2	ENSG00000077150.13	13.1674	14.6591	12.7416	11.9693	12.18	9.3056	-0.391887	0.0121835	0.19688
MRM1	ENSG00000129282.8	7.4421	7.8225	7.8914	6.7561	7.1917	6.3228	-0.432374	0.0155032	0.207139
SECISBP2L	ENSG00000138593.4	2.2869	1.8597	1.2899	2.4185	2.6615	3.6298	0.473268	0.0145226	0.204796
SIKE1	ENSG00000052723.7	3.0243	2.5136	1.6411	3.3239	3.5256	4.5636	0.464469	0.014816	0.205414
DYNC1I2	ENSG00000077380.11	9.1775	7.9636	6.0159	9.4248	10.8399	12.9227	0.400044	0.0127201	0.197317
DLD	ENSG00000091140.8	8.1231	6.9624	4.2715	8.3505	9.1178	12.1736	0.507503	0.0128047	0.197317
CHMP1B	ENSG00000255112.2	10.3474	8.9726	10.0402	13.8569	12.7305	14.0459	0.331996	0.0132053	0.199573
MRPL12	ENSG00000262814.2	7.2784	7.9486	6.3984	6.4777	6.7715	3.5949	-0.653495	0.0176668	0.213074
CRK	ENSG00000167193.7	15.1838	11.0789	9.3063	15.0662	15.5952	19.6036	0.422962	0.0121331	0.19684
MIB1	ENSG00000101752.7	1.9258	1.7317	1.0123	2.2653	2.2099	2.928	0.481139	0.0146503	0.205125
PRPF39	ENSG00000185246.13	0.8121	0.5941	0.559	1.0077	0.9305	1.4132	0.545019	0.0189892	0.218203
C1orf143	ENSG00000228208.2	0.0439	0.1234	0.0482	0	0	0	-1.96953	0.00864084	0.186038
CLOCK	ENSG00000134852.10	1.1712	1.2421	0.7566	1.4974	1.5388	2.0204	0.454959	0.0152586	0.206509
ADCYAP1R1	ENSG00000078549.10	1.8371	1.4203	2.0683	1.4982	1.3367	1.5552	-0.497475	0.0162069	0.208935
ANPEP	ENSG00000166825.9	33.1879	31.2203	35.526	29.2142	27.5549	25.0748	-0.27331	0.0102382	0.190334
CPNE7	ENSG00000178773.10	1.083	0.7853	0.9679	0.8232	0.6429	0.5525	-0.655427	0.02061	0.224348
NAT8L	ENSG00000185818.7	1.4618	1.0825	1.2357	1.1342	1.0012	1.0278	-0.479968	0.017633	0.213074
CORO6	ENSG00000167549.14	3.3409	2.9034	3.1004	3.1715	2.3867	2.6415	-0.443516	0.0159152	0.207973
ERLIN2	ENSG00000147475.10	6.2968	5.6295	5.3914	7.1841	7.1428	8.1161	0.296631	0.0120583	0.196638
SPRTN	ENSG00000010072.11	1.4979	1.3626	1.1465	1.9446	2.0866	2.2098	0.401679	0.0165638	0.210697
AFTPH	ENSG00000119844.10	1.5869	1.337	0.8509	2.0088	1.7424	2.4852	0.504525	0.0168033	0.21167
ZKSCAN8	ENSG00000198315.6	3.0137	2.4548	1.9307	3.4636	3.2104	4.7304	0.429731	0.0143926	0.204122
RPS3A	ENSG00000145425.5	335.669	379.295	355.531	372.266	451.298	388.737	0.208589	0.00688633	0.177306
PPOX	ENSG00000143224.13	2.9711	2.9113	2.9079	2.5347	2.9436	2.0003	-0.497498	0.0160664	0.207973
ARHGEF12	ENSG00000196914.4	4.7995	3.7354	2.9851	4.8627	4.6912	6.2742	0.444031	0.0110281	0.192309
ZCCHC6	ENSG00000083223.13	2.0015	1.5998	0.9374	2.0649	2.3295	3.5222	0.584096	0.015954	0.207973
ALAS1	ENSG00000023330.10	25.3385	28.0221	29.3122	34.1168	36.7818	34.4754	0.300212	0.0116852	0.194582
CTF1	ENSG00000150281.6	10.3684	12.4252	12.6723	10.5266	9.6682	9.8674	-0.440554	0.0151548	0.206187
TAF7	ENSG00000178913.5	17.7096	16.6416	15.4833	20.4561	21.6322	25.6728	0.322975	0.0129823	0.197941
BTBD1	ENSG00000064726.5	12.0879	10.3146	7.9814	12.7552	13.3207	16.6626	0.392034	0.0127136	0.197317
DDX42	ENSG00000198231.8	13.5896	9.8655	9.9895	13.9253	13.1859	16.6451	0.374942	0.0110385	0.192309
RP11-247C2.2	ENSG00000248540.2	0.4757	0.5608	0.3286	0.2682	0.2866	0.2456	-0.836272	0.0221198	0.225923
KCNH3	ENSG00000135519.6	1.5273	1.8868	1.7123	1.369	1.6321	1.1297	-0.565925	0.018108	0.214929
HSPH1	ENSG00000120694.15	24.6436	22.3214	15.9364	24.7573	28.1794	33.5227	0.425548	0.01125	0.192551
GREM1	ENSG00000166923.6	69.5247	54.9024	51.4739	66.5698	69.8484	82.7046	0.350285	0.00922105	0.186979
KRT19	ENSG00000171345.9	1.9029	2.0493	1.677	1.5493	1.6555	1.2215	-0.562617	0.0197838	0.221175
NFE2L2	ENSG00000116044.11	5.9086	4.6948	3.316	5.9552	7.1143	7.4441	0.428019	0.0138284	0.201347
POMZP3	ENSG00000146707.10	24.3358	24.5703	26.1182	21.5732	22.831	20.2599	-0.338356	0.0132193	0.199573
AC097381.1	ENSG00000228919.3	0	0	0	0.0373	0.0398	0.1084	1.94061	0.00917528	0.186918
RP11-41O4.1	ENSG00000266258.1	0	0	0	0.0464	0.0496	0.1349	1.94061	0.00917528	0.186918
CASC10	ENSG00000204682.5	4.4927	3.9737	4.4916	3.5927	3.8798	4.1228	-0.387561	0.0158005	0.20784
MOSPD1	ENSG00000101928.8	3.5375	2.9004	2.1334	4.4015	3.8167	5.8933	0.482556	0.0170977	0.212308
PLP2	ENSG00000102007.6	108.948	111.124	132.803	97.5274	95.7898	94.1793	-0.280084	0.0107379	0.191185
VEGFB	ENSG00000173511.5	77.1579	77.4419	81.0469	70.516	67.7129	58.9674	-0.290276	0.0111802	0.192551
ROPN1	ENSG00000065371.13	0	0	0	0.0329	0.0117	0.0106	1.93859	0.00922517	0.186979
PXDC1	ENSG00000168994.9	16.5981	17.2313	19.6663	15.2331	15.8609	14.4269	-0.360619	0.0134517	0.200201
IL6ST	ENSG00000134352.15	6.4797	5.676	2.946	6.4343	7.5137	9.5954	0.587215	0.0126712	0.197317
EPRS	ENSG00000136628.13	11.2737	8.7913	5.3245	11.0498	12.2807	14.6173	0.524697	0.0127419	0.197317
RFX3	ENSG00000080298.11	0.1755	0.1608	0.1578	0.2055	0.3644	0.3815	0.697594	0.0215074	0.225923
TNFAIP8L1	ENSG00000185361.4	3.9345	4.1287	3.9608	3.2787	3.9367	3.3539	-0.378277	0.0147323	0.205125
STAT1	ENSG00000115415.14	10.4051	8.4405	6.6318	11.1528	10.5717	13.3002	0.389038	0.0126125	0.197317
SEC14L5	ENSG00000103184.7	0.0408	0.0127	0.0224	0.0149	0	0	-2.16618	0.0107305	0.191185
NOL8	ENSG00000198000.7	1.486	1.4805	0.7865	1.8209	1.869	2.5898	0.527547	0.0165266	0.210544
RELL2	ENSG00000164620.4	5.5779	5.2142	5.9989	5.1303	5.1246	4.2166	-0.459879	0.0164074	0.210004
LIPG	ENSG00000101670.7	0.4718	0.3626	0.561	0.2035	0.3353	0.3864	-0.773441	0.0220653	0.225923
MAP1S	ENSG00000130479.6	11.5533	12.1594	13.9143	11.087	10.282	10.1911	-0.331207	0.0127669	0.197317
THOP1	ENSG00000172009.10	23.58	26.7719	26.3804	21.4933	22.83	18.3361	-0.312909	0.0111446	0.192551
GAREML	ENSG00000157833.8	1.9861	2.0846	2.4023	1.6819	2.0143	1.8195	-0.468723	0.0168187	0.21167
C2orf44	ENSG00000163026.7	4.1072	3.1217	2.879	4.9672	4.4902	6.3474	0.413443	0.0159294	0.207973
NTMT1	ENSG00000148335.10	17.266	18.8285	17.2187	15.393	16.5065	13.7152	-0.355352	0.0134351	0.200201
NRM	ENSG00000137404.10	17.6007	16.7896	20.3475	15.1841	16.5832	14.9979	-0.370085	0.014084	0.203175
NDUFS1	ENSG00000023228.9	3.7275	3.2697	2.7872	4.1418	4.1359	5.2544	0.352134	0.0132667	0.199573
CCDC82	ENSG00000149231.7	1.5248	1.2289	0.8724	1.6649	1.8086	2.5449	0.483344	0.0171198	0.212308
PARP9	ENSG00000138496.12	2.4178	2.0685	2.0021	2.7642	2.9999	4.077	0.39469	0.0149593	0.206093
NRD1	ENSG00000078618.15	10.659	8.6539	6.7442	11.2197	10.8051	13.5057	0.390802	0.0124746	0.197317
TMEM180	ENSG00000138111.10	3.1676	3.4669	3.7213	2.9425	2.8474	3.2198	-0.439243	0.0167721	0.21167
NCAPH2	ENSG00000025770.14	13.2219	14.4616	13.3197	12.2354	12.5359	9.6549	-0.403167	0.0137464	0.201347
IFT80	ENSG00000068885.10	0.3803	0.2416	0.182	0.4573	0.3521	0.6715	0.72889	0.0217812	0.225923
B4GALT2	ENSG00000117411.12	35.9627	37.7074	39.019	32.8125	32.2239	27.8469	-0.281904	0.0110702	0.192309
RAB26	ENSG00000167964.8	3.3257	3.334	3.1297	3.0062	3.0466	2.1246	-0.528472	0.0183028	0.216299
MIF	ENSG00000240972.1	100.13	112.158	120.104	89.808	90.8524	94.2324	-0.28186	0.0113935	0.193299
EGR1	ENSG00000120738.7	4.7968	4.09	4.223	4.2595	3.8615	3.5032	-0.425248	0.016664	0.21117
GPR56	ENSG00000205336.7	2.0951	2.4308	2.5173	1.7402	2.3306	1.9231	-0.457914	0.0158039	0.20784
NEDD1	ENSG00000139350.7	2.8237	2.0752	1.0902	2.9285	3.0271	4.6582	0.645072	0.0173593	0.212609
IFI16	ENSG00000163565.14	6.1355	5.5581	3.572	6.8271	6.9836	8.8892	0.437041	0.0142304	0.203642
YWHAG	ENSG00000170027.5	119.827	102.449	112.393	126.016	126.561	140.973	0.237834	0.00848764	0.184936
STIL	ENSG00000123473.11	1.974	1.998	1.5456	2.4356	2.6662	3.4839	0.40441	0.0159725	0.207973
DHRS11	ENSG00000108272.9	3.2312	3.2791	3.3913	3.0303	3.0209	2.5864	-0.422536	0.015998	0.207973
WDR34	ENSG00000119333.7	30.9643	31.7595	30.0512	26.3138	28.6135	22.6708	-0.328414	0.0123674	0.196975
LRRC58	ENSG00000163428.3	3.8483	3.3368	2.0011	4.1581	4.3193	5.5876	0.476974	0.014512	0.204796
NKAIN1	ENSG00000084628.5	4.6856	3.8823	4.987	4.2487	3.7978	3.3827	-0.481929	0.0169167	0.212308
EIF4G2	ENSG00000110321.11	77.9209	67.0641	63.91	76.8391	79.94	100.865	0.3385	0.0077593	0.179768
SAPCD2	ENSG00000186193.7	8.2001	8.3976	7.5132	7.3957	7.4199	6.2323	-0.379934	0.0146496	0.205125
CD3EAP	ENSG00000117877.6	17.8647	19.0166	19.9216	14.9205	17.9156	14.6176	-0.335002	0.0127451	0.197317
SOCS1	ENSG00000185338.4	12.9703	13.5091	11.8443	10.5569	13.2171	10.1959	-0.433166	0.0164458	0.210294
WDR17	ENSG00000150627.11	0.366	0.1584	0.0619	0.4074	0.2573	0.5146	1.11508	0.0227999	0.22783
ETV7	ENSG00000010030.9	0.0743	0.0871	0.0204	0.0204	0	0	-2.14127	0.0106563	0.191185
RRN3	ENSG00000085721.8	7.5614	6.9608	5.004	8.5571	8.747	10.8955	0.387157	0.0143733	0.204122
PIGK	ENSG00000142892.10	4.0157	4.0946	3.167	4.5952	5.5464	7.3312	0.430046	0.0149784	0.206093
DENND2D	ENSG00000162777.12	0.3272	0.2769	0.2631	0.245	0.187	0.1103	-0.844345	0.0234045	0.229804
FAM110B	ENSG00000169122.7	4.0246	3.6151	3.0723	3.5241	2.9626	3.0473	-0.397197	0.0161829	0.208842
CDIP1	ENSG00000089486.12	16.3758	17.2306	17.689	15.1615	15.1864	12.1769	-0.348332	0.0127153	0.197317
DNM1L	ENSG00000087470.13	5.1401	4.5267	3.1978	5.6422	5.62	8.0482	0.445874	0.0140802	0.203175
ARFRP1	ENSG00000101246.15	4.0774	4.1214	4.1119	3.6016	3.9164	3.1104	-0.390027	0.0147704	0.205231
ITGAV	ENSG00000138448.7	8.5763	6.4534	4.3234	8.1511	9.0178	11.1948	0.501544	0.0128355	0.197317
SESN2	ENSG00000130766.4	8.8076	9.2743	10.0286	7.9516	8.5118	7.8439	-0.364815	0.0146838	0.205125
TTC7A	ENSG00000068724.11	4.1169	3.9196	4.2246	3.7984	3.5024	3.4736	-0.358458	0.0149991	0.206093
CAMK2N2	ENSG00000163888.3	7.9171	9.4232	11.5051	7.1921	8.8968	6.8004	-0.563816	0.0172989	0.212609
WDR48	ENSG00000114742.9	2.5004	1.9749	1.5839	2.5479	3.0948	3.9582	0.43994	0.0158879	0.207973
PGM3	ENSG00000013375.11	3.4521	2.9103	1.7944	3.64	4.0584	4.9452	0.464933	0.015204	0.206228
POTEH	ENSG00000198062.10	0.0202	0	0.0443	0.0884	0.0708	0.1499	1.9773	0.0124127	0.19711
ZNF195	ENSG00000005801.12	1.1495	1.0851	0.8562	1.4633	1.5184	2.0499	0.448368	0.0186831	0.216949
PAQR4	ENSG00000162073.9	10.9439	11.5251	13.0349	10.3101	10.3405	9.7272	-0.370625	0.0145551	0.204796
DENND5B	ENSG00000170456.10	1.4398	1.1457	1.0177	1.6767	1.655	2.25	0.399087	0.0162696	0.209202
METAP2	ENSG00000111142.9	8.2518	7.0756	5.1692	8.4238	9.5986	12.1764	0.426819	0.0142156	0.203642
HNMT	ENSG00000150540.9	0.3983	0.3908	0.2544	0.528	0.6185	0.6694	0.646277	0.0228255	0.22783
HNRNPA2B1	ENSG00000122566.16	49.2713	42.5435	36.217	48.312	50.7089	67.7272	0.376558	0.00911811	0.186918
QPCTL	ENSG00000011478.7	9.901	10.3515	10.0321	8.8413	9.6628	8.0047	-0.397858	0.0155494	0.207235
ACBD4	ENSG00000181513.10	2.1214	1.8689	1.9084	1.5207	1.8572	1.7468	-0.44939	0.0190132	0.218203
RB1CC1	ENSG00000023287.8	1.601	1.3819	0.7113	1.7933	1.9095	2.5493	0.566621	0.0173455	0.212609
SLC12A4	ENSG00000124067.12	7.4574	7.6788	7.2272	6.577	6.8913	5.3048	-0.360774	0.0132549	0.199573
THOC6	ENSG00000131652.9	11.5947	12.8686	12.4291	11.9339	10.7563	8.2995	-0.479169	0.0158553	0.207973
KIAA1033	ENSG00000136051.9	2.2249	1.7698	0.8234	2.3704	2.4659	3.5259	0.645535	0.0166143	0.210955
ZRANB2	ENSG00000132485.8	6.2674	5.5294	3.613	6.5331	7.353	9.5094	0.455907	0.0147379	0.205125
TFDP2	ENSG00000114126.13	2.0351	1.8735	1.6508	2.4218	2.5099	3.0478	0.341079	0.0151856	0.206228
C12orf45	ENSG00000151131.5	4.7907	4.2312	3.6681	3.287	3.6573	3.942	-0.453385	0.0198779	0.221318
MAPK3	ENSG00000102882.7	26.2828	29.3231	29.5141	25.0281	24.524	21.649	-0.299894	0.0121087	0.196744
BNIP3L	ENSG00000104765.10	5.6306	4.2734	3.7056	6.05	6.3093	7.8309	0.382171	0.0155196	0.207152
SCN4B	ENSG00000177098.4	0.5142	0.5187	0.4024	0.4015	0.2738	0.3726	-0.615835	0.0228968	0.227866
CBX3	ENSG00000122565.14	17.4969	15.0366	10.0459	17.0622	19.4766	23.5355	0.460378	0.0126022	0.197317
MXD3	ENSG00000213347.6	2.9376	2.298	2.2521	2.556	1.9909	1.9968	-0.445604	0.017512	0.213074
DPM3	ENSG00000179085.7	62.1272	70.3287	61.2716	56.0123	59.1075	52.1185	-0.35516	0.0144105	0.204122
STAM2	ENSG00000115145.5	2.1928	2.1091	1.2773	2.4937	2.7677	3.9133	0.49706	0.0165912	0.210845
MARVELD1	ENSG00000155254.8	68.1368	65.2326	71.4936	57.2708	58.6332	55.2424	-0.225259	0.0104009	0.191185
INTU	ENSG00000164066.8	0.3233	0.2569	0.1656	0.3544	0.4429	0.46	0.560161	0.0203589	0.223095
EIF2S1	ENSG00000134001.8	10.5845	9.9465	7.8396	11.4595	12.291	13.8821	0.33546	0.0131831	0.199573
TXNDC12	ENSG00000117862.7	21.4365	25.3181	23.5825	26.7725	30.2421	33.0931	0.323709	0.0121532	0.19684
OSBPL10	ENSG00000144645.9	0.0551	0.0345	0.0646	0.0081	0.0172	0.0391	-1.43117	0.0197195	0.220939
ACAT1	ENSG00000075239.9	5.4464	4.8186	3.8283	5.9886	6.3346	7.7825	0.362942	0.014914	0.20605
ESYT2	ENSG00000117868.11	13.9284	11.1112	11.1127	14.3525	14.6172	18.1405	0.344149	0.0121525	0.19684
ERCC2	ENSG00000104884.10	16.9568	19.6745	19.3082	15.8753	16.4764	13.6638	-0.311684	0.0119328	0.195516
ZNF223	ENSG00000267022.1	0.8415	0.5917	0.488	1.3069	0.8489	1.2049	0.618697	0.0221506	0.225923
ZNF223	ENSG00000178386.8	0.9519	0.6694	0.5521	1.4785	0.9603	1.363	0.618697	0.0221506	0.225923
FAHD2A	ENSG00000115042.5	3.5971	4.5967	4.7041	3.5094	4.0049	2.9232	-0.506966	0.0159528	0.207973
PAQR3	ENSG00000163291.10	1.1	1.0148	0.7721	1.28	1.4384	1.8481	0.411025	0.0169673	0.212308
RBM18	ENSG00000119446.9	2.6443	2.2887	1.9931	3.1129	3.4554	4.0806	0.376858	0.0170066	0.212308
PTPN4	ENSG00000088179.4	0.4492	0.385	0.2314	0.604	0.4522	0.8578	0.621867	0.0200436	0.222199
EIF4B	ENSG00000063046.13	42.9098	35.675	34.1681	43.1746	42.1587	53.7811	0.330266	0.0100476	0.190305
TIMMDC1	ENSG00000113845.5	30.6799	31.4274	30.294	38.6035	36.6612	39.0508	0.26321	0.0122786	0.19688
KIAA1429	ENSG00000164944.7	3.4774	2.8046	2.1059	3.5616	3.8729	4.7469	0.408119	0.0145852	0.204796
LCA5	ENSG00000135338.9	0.2288	0.2768	0.1622	0.2832	0.4842	0.549	0.792727	0.0238544	0.231003
G3BP1	ENSG00000145907.10	9.671	8.6123	7.2394	9.8524	10.3826	12.3753	0.339162	0.0117316	0.194841
LCOR	ENSG00000196233.7	0.6137	0.4715	0.3002	0.6642	0.7097	0.9553	0.5495	0.0196975	0.220785
RIF1	ENSG00000080345.13	0.8431	0.9042	0.3754	0.9191	1.3029	1.5528	0.66236	0.0167869	0.21167
AXIN1	ENSG00000103126.10	6.1607	6.438	6.3952	5.5943	5.7852	4.9672	-0.341127	0.0141778	0.203595
IFRD2	ENSG00000214706.6	22.4687	23.736	21.7717	19.1614	21.2394	16.0172	-0.347444	0.012828	0.197317
FAHD2B	ENSG00000144199.7	3.2902	3.4571	3.4338	3.2085	2.983	2.3899	-0.500884	0.018929	0.217899
ADCK1	ENSG00000063761.11	2.384	2.6001	2.3013	2.1963	2.1335	2.2435	-0.397678	0.017687	0.213074
PGLS	ENSG00000130313.2	32.9901	35.2963	34.2303	30.0509	30.6448	25.2214	-0.31265	0.0124859	0.197317
CYP26B1	ENSG00000003137.4	0.8688	0.4937	0.5304	0.5581	0.3804	0.3638	-0.683037	0.0230357	0.228175
MAATS1	ENSG00000183833.12	0.3035	0.18	0.1225	0.3124	0.3338	0.4476	0.766861	0.0239624	0.231003
DDR2	ENSG00000162733.12	10.4474	8.3306	6.5988	10.1995	10.5242	13.8374	0.431704	0.0121275	0.19684
DDX18	ENSG00000088205.8	7.7979	7.0279	4.4107	7.5415	9.7006	11.0229	0.482894	0.0134553	0.200201
TRAF1	ENSG00000056558.6	1.713	1.555	1.1999	1.2122	1.5112	1.1171	-0.472627	0.0188309	0.217098
ZNF865	ENSG00000261221.1	14.2203	14.8175	16.0369	13.4823	12.4371	12.7547	-0.310266	0.0137055	0.200961
ARPP19	ENSG00000128989.6	16.2383	14.2056	11.502	16.415	17.2425	21.9929	0.387338	0.0120416	0.196632
TM9SF3	ENSG00000077147.10	14.4227	11.7901	8.5481	14.4185	14.7896	19.2785	0.451374	0.0123863	0.196983
ANKIB1	ENSG00000001629.5	7.1544	5.0876	4.097	7.0656	7.3766	9.054	0.425924	0.0141696	0.203595
ELF4	ENSG00000102034.12	9.0962	8.8255	10.4438	8.4188	8.136	7.7387	-0.354127	0.0147309	0.205125
SCRIB	ENSG00000180900.12	25.0485	25.5928	25.463	20.8541	23.4668	17.8216	-0.29873	0.011537	0.193537
ZC3H15	ENSG00000065548.13	7.873	7.5802	4.5965	8.6163	10.1642	11.8406	0.443362	0.0157807	0.207807
CNOT7	ENSG00000198791.7	8.0592	7.2416	5.4454	8.6842	8.8165	11.5283	0.391779	0.0138097	0.201347
MOSPD3	ENSG00000106330.7	29.6818	28.5483	32.168	28.0692	25.3038	23.9314	-0.337294	0.0141623	0.203595
MTM1	ENSG00000171100.10	1.0655	0.8767	0.5137	1.3113	1.2738	1.6178	0.591354	0.021587	0.225923
GCLC	ENSG00000001084.6	1.0193	0.9753	0.8972	1.3969	1.444	1.6803	0.390805	0.0185245	0.216949
GPATCH2L	ENSG00000089916.13	1.2311	1.0004	0.7105	1.2663	1.4634	1.6914	0.418104	0.0157627	0.207807
CADM2	ENSG00000175161.9	0.0705	0.0454	0.0387	0.0821	0.0981	0.1358	0.937798	0.024491	0.233356
FMNL3	ENSG00000161791.9	7.5558	7.5531	7.536	6.4073	6.8554	6.2153	-0.273981	0.0128249	0.197317
NIN	ENSG00000100503.19	2.5829	2.2379	1.5305	2.7402	2.9092	3.7504	0.432452	0.0150082	0.206093
ARL8B	ENSG00000134108.8	9.849	8.0921	6.683	10.6497	10.4714	15.087	0.413753	0.0149743	0.206093
GPSM1	ENSG00000160360.7	18.5129	18.4435	19.199	16.7256	16.6422	14.0573	-0.303645	0.0128247	0.197317
C19orf24	ENSG00000228300.9	31.9823	35.3355	31.2435	27.8751	29.9986	24.9091	-0.31558	0.0129697	0.197861
MATR3	ENSG00000015479.13	7.483	6.8785	4.4048	7.2831	8.5945	10.8361	0.49801	0.0122582	0.19688
CTNNBIP1	ENSG00000178585.10	14.9825	14.0483	14.8579	13.9726	12.54	10.7467	-0.367899	0.0144458	0.204431
MAP3K1	ENSG00000095015.5	1.9565	1.7275	1.473	2.2514	2.5127	3.195	0.388239	0.0171767	0.212417
KIAA1671	ENSG00000197077.8	3.4669	2.8933	3.2104	2.776	2.823	2.7444	-0.307592	0.0143161	0.203997
EEF1A2	ENSG00000101210.6	88.7895	97.6513	101.163	81.5847	83.2348	71.1453	-0.271116	0.0113798	0.193194
EPHB2	ENSG00000133216.12	11.6053	13.4524	12.4095	10.7224	11.0511	9.6641	-0.317261	0.0132558	0.199573
RYK	ENSG00000163785.8	4.9123	3.8263	3.8851	5.4522	5.2519	7.1116	0.367836	0.0147322	0.205125
CHTF18	ENSG00000127586.12	2.7898	3.0693	2.9676	2.5449	2.7368	2.6173	-0.391811	0.0172301	0.212576
MORF4L1	ENSG00000185787.10	24.6735	23.4673	22.4118	25.7836	27.2933	33.3789	0.310726	0.0112282	0.192551
PARM1	ENSG00000169116.7	0	0	0	0.0192	0.0102	0.0093	1.83073	0.011299	0.192551
HAVCR2	ENSG00000135077.4	0	0	0	0.0254	0.0136	0.0123	1.83073	0.011299	0.192551
ALX4	ENSG00000052850.5	0	0	0	0.0168	0.009	0.0081	1.83073	0.011299	0.192551
TMEM132E	ENSG00000181291.5	0	0	0	0.0211	0.0113	0.0102	1.83073	0.011299	0.192551
EGFL6	ENSG00000198759.7	0	0	0	0.037	0.0198	0.0179	1.83073	0.011299	0.192551
FGF1	ENSG00000113578.13	2.1436	2.4021	2.0778	1.7387	1.9498	2.232	-0.417196	0.0185987	0.216949
LRRC24	ENSG00000254402.2	4.4956	5.2866	5.2677	4.466	4.1903	4.0654	-0.483649	0.0194505	0.219756
ERCC1	ENSG00000012061.11	25.3373	26.3108	27.9898	22.9156	22.9151	20.386	-0.262445	0.0118085	0.195026
FRRS1	ENSG00000156869.8	0.3623	0.1911	0.1742	0.5214	0.3316	0.5055	0.819787	0.0252879	0.2355
SLC4A7	ENSG00000033867.12	1.063	0.9493	0.6271	1.221	1.2993	1.8146	0.471407	0.0186316	0.216949
MAN2A1	ENSG00000112893.5	4.608	3.3811	2.1204	4.5743	4.7134	5.8874	0.514804	0.0143577	0.204122
NRG1	ENSG00000157168.14	3.012	2.1936	2.3623	2.1994	1.9596	2.5476	-0.386008	0.0170911	0.212308
AAAS	ENSG00000094914.8	18.4219	18.1708	20.3719	16.6756	16.5607	14.8543	-0.305981	0.013384	0.200081
ZNF219	ENSG00000165804.11	10.8349	10.5149	10.3645	10.0188	9.1844	7.7578	-0.364257	0.0145804	0.204796
ETV1	ENSG00000006468.9	3.4943	2.9057	2.4467	3.6318	4.2269	4.7619	0.3597	0.0152889	0.206509
RLF	ENSG00000117000.8	0.6483	0.8061	0.4104	0.9425	1.0072	1.2283	0.578049	0.0213973	0.225923
IRF7	ENSG00000185507.15	5.9454	5.4648	5.1346	5.3432	5.0426	4.45	-0.408017	0.0179507	0.214553
POLD1	ENSG00000062822.8	10.3506	10.9545	10.2485	9.3607	9.5885	8.246	-0.333757	0.014494	0.204796
GALNS	ENSG00000141012.8	6.3856	6.2428	5.9865	5.2895	5.8364	5.1611	-0.308019	0.0144163	0.204122
PWWP2B	ENSG00000171813.10	5.0305	5.106	4.8528	4.5506	4.9016	3.6174	-0.462241	0.0183194	0.216383
CSNK1G2	ENSG00000133275.11	40.1619	45.2986	44.613	38.0421	36.8834	31.8901	-0.276501	0.0114459	0.193537
ITGA1	ENSG00000213949.4	3.1363	2.8118	1.7818	3.2436	3.716	4.0137	0.434886	0.0140179	0.202729
LACE1	ENSG00000135537.12	0.2031	0.21	0.1431	0.3027	0.2563	0.4484	0.673042	0.0246189	0.233954
FUOM	ENSG00000148803.7	9.4658	9.977	9.6425	9.0903	9.0257	7.0866	-0.467403	0.0185853	0.216949
HSF2	ENSG00000025156.8	3.8116	3.0852	1.9152	4.4111	4.122	6.3711	0.528467	0.0190192	0.218203
EXOC5	ENSG00000070367.11	2.4786	2.0124	1.2836	2.5509	2.7759	3.9062	0.490293	0.0166381	0.211041
MAN1A1	ENSG00000111885.5	29.5573	23.4932	18.9369	29.1242	28.5872	37.3025	0.409916	0.0117156	0.194695
PIK3R2	ENSG00000105647.10	84.6786	87.4809	93.9488	77.8641	74.5644	70.0337	-0.219183	0.00970072	0.189016
PIK3R2	ENSG00000268173.1	74.5013	76.9669	82.6574	68.5058	65.6027	61.6166	-0.219183	0.00970072	0.189016
SMPD4	ENSG00000136699.15	14.6748	15.0021	16.1322	13.2293	12.7783	13.0699	-0.258762	0.0126139	0.197317
TPBGL	ENSG00000261594.3	0.5673	0.5467	0.7792	0.4146	0.4246	0.3517	-0.760533	0.0256759	0.236346
GFM2	ENSG00000164347.13	6.9317	6.1357	5.1971	7.9102	8.0349	10.0535	0.346696	0.0157816	0.207807
DMBT1	ENSG00000187908.11	0.0382	0.0409	0.0659	0.1076	0.0766	0.1333	1.04113	0.0245512	0.233559
TRIM52	ENSG00000183718.4	0.5546	0.4231	0.4132	0.7936	0.6608	0.8592	0.554865	0.0238642	0.231003
GDPD1	ENSG00000153982.6	0.7261	0.7086	0.5211	1.0723	0.9896	1.2285	0.575935	0.0242939	0.232133
CGGBP1	ENSG00000163320.6	6.5239	5.0743	4.2477	6.6396	6.8725	9.5648	0.415877	0.0150094	0.206093
BZW1	ENSG00000082153.13	23.2089	18.662	13.5521	21.611	25.5629	30.5951	0.462359	0.0127911	0.197317
HIP1R	ENSG00000130787.9	4.3257	4.5034	4.5967	3.7166	4.3417	3.6095	-0.370286	0.0159741	0.207973
INSIG2	ENSG00000125629.10	1.1368	1.1809	0.7348	1.393	1.7366	2.0612	0.533788	0.0216829	0.225923
BCAT1	ENSG00000060982.10	4.4259	4.2534	2.891	4.6849	5.4139	6.5351	0.415107	0.0146749	0.205125
SOD2	ENSG00000112096.12	4.3097	4.1453	2.5704	4.9411	5.5488	4.7801	0.422152	0.0133255	0.199876
ECI1	ENSG00000167969.8	12.6839	13.5009	11.8592	11.7279	11.4161	8.9392	-0.398208	0.0153641	0.206517
ODF2L	ENSG00000122417.11	0.6122	0.5057	0.3524	0.7457	0.7001	0.9863	0.508093	0.0213786	0.225923
ZNF805	ENSG00000204524.5	0.5711	0.4544	0.4945	0.6641	1.0341	1.1037	0.702596	0.0255644	0.236148
UBL3	ENSG00000122042.9	2.7207	2.1274	1.6658	2.8178	3.4697	4.2255	0.444824	0.0187339	0.217098
C1orf27	ENSG00000157181.10	2.3315	2.3551	1.1063	2.9745	2.9426	3.9086	0.568854	0.0192873	0.219267
DCLK2	ENSG00000170390.10	3.7468	3.01	4.0435	3.2569	2.7281	3.2897	-0.432701	0.0180446	0.214699
TLX3	ENSG00000164438.5	11.9096	11.7475	10.3013	10.7627	10.4992	9.1803	-0.396214	0.0179033	0.214262
SLC2A2	ENSG00000163581.9	0.0515	0	0.0283	0.0847	0.1207	0.0685	1.95062	0.016591	0.210845
ZNF720	ENSG00000197302.6	0.4798	0.3742	0.2513	0.5162	0.6304	0.7244	0.562932	0.0222562	0.225923
LMBRD1	ENSG00000168216.6	5.5153	4.5014	3.1008	6.4687	6.5045	7.6147	0.42696	0.0185288	0.216949
PIGZ	ENSG00000119227.3	1.0828	0.9639	0.8585	0.8566	0.6745	0.7138	-0.553618	0.0242974	0.232133
AHCTF1	ENSG00000153207.10	4.6078	3.3027	2.2196	4.3288	4.9101	6.0561	0.49737	0.0153355	0.206516
MANEA	ENSG00000172469.10	1.434	1.1377	0.4755	1.4978	1.6303	2.435	0.743329	0.0209894	0.225923
ESRP2	ENSG00000103067.7	0.0158	0.0074	0.0087	0.052	0.0649	0.0252	1.68518	0.0157738	0.207807
TUSC1	ENSG00000198680.3	5.2937	5.3828	5.4633	5.0588	5.0495	3.8776	-0.467146	0.0188337	0.217098
JPH3	ENSG00000154118.8	1.5335	1.3337	1.4246	1.397	1.0936	1.2283	-0.449555	0.0203544	0.223095
PTP4A2	ENSG00000184007.13	20.0113	17.6663	18.1695	21.4897	20.8468	26.8045	0.312677	0.0122557	0.19688
CAMK2A	ENSG00000070808.11	0.2362	0.1745	0.2674	0.204	0.0503	0.1369	-1.04397	0.0264779	0.236674
RPL18A	ENSG00000105640.8	325.297	361.552	323.575	311.526	318.914	260.698	-0.180344	0.00757488	0.179578
TMEM181	ENSG00000146433.8	7.6185	5.7883	4.8633	7.8066	8.0359	10.0674	0.383588	0.0154003	0.206794
CCDC146	ENSG00000135205.10	0.0592	0.0556	0.0651	0.0866	0.2198	0.2204	1.26632	0.0238616	0.231003
FASTKD1	ENSG00000138399.13	0.969	0.9272	0.7606	1.2793	1.4133	1.6185	0.462793	0.022069	0.225923
PIKFYVE	ENSG00000115020.12	1.7187	1.3411	0.7635	1.8621	1.985	2.2457	0.503164	0.0178279	0.213592
AMY2B	ENSG00000240038.2	0	0	0	0.0064	0.0069	0.0125	1.7908	0.0123541	0.19688
FASLG	ENSG00000117560.6	0	0	0	0.0255	0.0273	0.0494	1.7908	0.0123541	0.19688
PON1	ENSG00000005421.4	0	0	0	0.0161	0.0173	0.0313	1.7908	0.0123541	0.19688
WDR16	ENSG00000166596.10	0	0	0	0.0157	0.0168	0.0304	1.7908	0.0123541	0.19688
TRIM3	ENSG00000110171.14	4.7817	4.8772	4.6851	4.6097	4.1727	3.7088	-0.373443	0.0162189	0.208952
NRXN2	ENSG00000110076.14	2.2838	1.8099	2.0525	1.9293	1.8179	1.6536	-0.394952	0.0173728	0.212609
GNS	ENSG00000135677.6	46.6881	40.5919	44.1619	48.9532	50.2097	51.5579	0.222074	0.0104402	0.191185
OSBPL8	ENSG00000091039.12	2.225	1.7947	0.8676	2.2611	2.7693	3.0769	0.586782	0.017616	0.213074
TBC1D23	ENSG00000036054.8	1.5755	1.5891	0.7674	1.8394	2.235	2.6159	0.570589	0.0202208	0.22244
MOB3A	ENSG00000172081.9	19.9537	19.7241	22.5676	17.9922	18.3188	15.8635	-0.310882	0.0136693	0.200761
CALM1	ENSG00000198668.6	32.5996	26.7213	24.7125	32.0089	32.0089	38.8376	0.322818	0.0109795	0.192309
HDAC7	ENSG00000061273.13	11.8315	11.8082	12.2273	10.4707	10.7009	9.2512	-0.272352	0.0128658	0.197317
PRKACB	ENSG00000142875.15	4.3578	3.6533	2.5935	4.6693	4.7578	6.7758	0.444824	0.0163789	0.209739
FAM89B	ENSG00000176973.7	2.898	2.9154	2.5542	2.1182	2.122	2.6309	-0.499125	0.0235432	0.230014
XPOT	ENSG00000184575.7	16.693	14.1054	11.5262	16.1984	17.6804	24.3041	0.440587	0.0126186	0.197317
DENND1B	ENSG00000213047.7	0.14	0.1594	0.0879	0.2449	0.1679	0.2905	0.699061	0.025463	0.235805
ZNF626	ENSG00000188171.10	0.1311	0.2398	0.1081	0.2516	0.2688	0.3902	0.828	0.0266678	0.236674
ASPH	ENSG00000198363.11	16.2852	13.1113	10.6045	14.7857	16.6205	20.7986	0.423856	0.01138	0.193194
PAPSS2	ENSG00000198682.8	24.8186	21.1455	21.7498	25.874	28.1495	29.9698	0.278718	0.0130256	0.198411
UBE4A	ENSG00000110344.5	8.1252	6.307	5.8175	8.2919	8.7743	10.6703	0.355101	0.0148203	0.205414
MRPL38	ENSG00000204316.8	0.3477	0.5335	0.5905	0.3004	0.3703	0.2128	-0.847754	0.0265387	0.236674
UBFD1	ENSG00000103353.11	12.8876	10.7779	11.9906	14.4492	13.7561	15.1047	0.268452	0.012747	0.197317
CCDC14	ENSG00000175455.10	2.3034	1.7799	1.5047	2.4514	2.4569	3.7441	0.445086	0.0166795	0.211266
RBM3	ENSG00000102317.13	50.5243	44.9738	44.6049	52.9104	52.4896	58.1255	0.252774	0.0116051	0.194185
LYNX1	ENSG00000180155.14	2.1871	2.0576	2.0909	1.9343	1.9645	1.7977	-0.403043	0.019195	0.218815
MUC1	ENSG00000185499.12	2.8596	2.1313	2.7194	2.6529	1.9114	1.3248	-0.651052	0.0222463	0.225923
STK17A	ENSG00000164543.5	17.6389	14.3099	12.3772	18.0405	18.0572	22.514	0.361184	0.0135973	0.200688
CACNA2D1	ENSG00000153956.11	2.6818	2.1024	1.6372	2.9188	2.8729	3.8731	0.403989	0.0171108	0.212308
ALDH16A1	ENSG00000161618.5	4.8913	5.6085	4.6875	4.4378	4.7754	4.0905	-0.39349	0.0173568	0.212609
JMJD8	ENSG00000161999.7	40.4286	40.3105	38.0214	36.099	34.3561	30.7408	-0.280762	0.0132919	0.19966
CSRNP3	ENSG00000178662.11	0.4799	0.3613	0.2733	0.4877	0.5786	0.9158	0.572542	0.0217356	0.225923
TREX1	ENSG00000213689.5	6.4907	6.349	5.6795	5.7325	6.0553	4.5139	-0.445996	0.0190941	0.218481
SMG1	ENSG00000157106.12	1.8371	1.5181	0.9183	2.0391	1.8846	2.4162	0.475473	0.0153982	0.206794
SYDE1	ENSG00000105137.8	28.4944	30.3918	30.4822	25.7519	26.8157	22.4279	-0.286128	0.0130358	0.198411
FBXO48	ENSG00000204923.3	0.2175	0.2622	0.2305	0.3918	0.3458	0.4954	0.649929	0.0264064	0.236674
RPS27A	ENSG00000143947.8	58.1585	67.216	55.3638	68.1882	78.4822	69.4358	0.27533	0.0114399	0.193537
STUB1	ENSG00000103266.6	116.113	124.162	120.618	105.155	106.467	90.8712	-0.238743	0.0109467	0.192297
IL17RB	ENSG00000056736.5	0.1014	0.0408	0.0796	0.0477	0	0.0154	-1.91844	0.0161776	0.208842
TMED5	ENSG00000117500.8	4.7782	4.0336	3.4029	4.6652	5.7512	7.4316	0.423459	0.0152767	0.206509
SYNCRIP	ENSG00000135316.13	13.7701	11.6339	9.2874	13.3259	15.0481	18.4854	0.40288	0.013188	0.199573
ADAM8	ENSG00000151651.11	5.5522	5.8017	5.8786	5.3201	5.2427	4.3549	-0.397506	0.0170216	0.212308
GLDC	ENSG00000178445.8	2.0702	1.9145	2.1814	1.4199	1.9713	1.929	-0.46904	0.0204434	0.223305
CENPB	ENSG00000125817.7	67.4447	69.3425	67.4544	60.0291	59.4616	48.5247	-0.272849	0.0118951	0.195349
PTCD3	ENSG00000132300.14	2.5892	2.3101	1.7937	3.1189	2.8762	3.7184	0.362621	0.016797	0.21167
SLC25A22	ENSG00000177542.6	20.8573	20.3387	20.1384	18.4449	18.3239	15.1085	-0.308732	0.013686	0.200895
TCP1	ENSG00000120438.7	33.3242	29.036	28.0432	33.8143	34.6687	42.3182	0.307364	0.012045	0.196632
USP7	ENSG00000187555.10	8.649	6.6701	6.4635	8.9436	8.7805	11.8635	0.37037	0.0142879	0.203899
NAMPT	ENSG00000105835.7	5.3551	4.6837	2.9075	5.3326	6.2738	7.8111	0.481483	0.0152381	0.206509
ERH	ENSG00000100632.6	77.8026	77.8589	72.1426	83.6231	96.8521	96.5829	0.268307	0.0128222	0.197317
ZNF467	ENSG00000181444.8	2.0445	1.9321	2.1405	1.9768	1.4334	1.6255	-0.514476	0.0226935	0.227351
KIAA1009	ENSG00000135315.7	0.3737	0.3123	0.0893	0.4453	0.4663	0.5439	0.956198	0.0266977	0.236674
ZNF92	ENSG00000146757.9	1.0934	0.9192	0.6215	1.1437	1.546	1.8968	0.588579	0.0236915	0.230604
TMEM204	ENSG00000131634.9	0.3655	0.121	0.1654	0.0707	0.0756	0.0686	-1.46358	0.0203419	0.223095
C16orf13	ENSG00000130731.11	39.3454	45.3952	38.6648	35.7931	36.3212	30.8945	-0.329101	0.0143421	0.204122
TMEM141	ENSG00000244187.3	4.0566	5.3194	3.7874	3.8122	3.895	2.7879	-0.563273	0.0224038	0.225923
TDP2	ENSG00000111802.9	4.8982	4.9142	3.5151	6.3097	6.1067	8.1203	0.393307	0.0184234	0.216915
ZFP69B	ENSG00000187801.10	1.3466	0.8821	0.9527	1.4763	1.7937	2.039	0.555417	0.0246806	0.234017
RAB31	ENSG00000168461.8	9.581	8.0158	7.8616	10.729	10.3478	12.7122	0.312908	0.0149917	0.206093
CDC6	ENSG00000094804.5	9.6823	7.9681	8.6947	11.1005	11.8618	13.2923	0.321463	0.0162745	0.209202
XIAP	ENSG00000101966.8	2.3457	2.2452	1.3987	2.6948	2.811	3.7838	0.437143	0.0176229	0.213074
UAP1L1	ENSG00000197355.6	3.499	3.4918	3.5978	3.2517	3.3185	2.7892	-0.404692	0.0184381	0.216915
UFM1	ENSG00000120686.7	6.942	6.9036	4.9314	7.7776	9.1325	10.583	0.381699	0.0169164	0.212308
IRF1	ENSG00000125347.9	2.4662	2.8627	2.989	2.2336	2.7372	2.0633	-0.456439	0.0180767	0.214699
CALCOCO2	ENSG00000136436.10	5.7043	4.373	4.382	6.4162	5.798	7.8479	0.357739	0.0154663	0.206957
SLC2A4	ENSG00000181856.10	0.087	0.0714	0.0837	0.1431	0.1912	0.1965	1.00277	0.0259221	0.236674
CAMK2N1	ENSG00000162545.5	20.0624	18.9692	23.8954	16.8106	17.4311	18.9798	-0.330332	0.0153363	0.206516
ARL2	ENSG00000213465.3	13.622	16.0598	14.992	13.4297	13.4847	11.4029	-0.396306	0.0169914	0.212308
ABHD13	ENSG00000139826.5	1.4924	1.3065	0.8154	1.7176	1.7774	2.445	0.497483	0.0211513	0.225923
KPNA3	ENSG00000102753.5	8.2905	7.1089	5.5613	8.7981	9.2399	12.0662	0.38682	0.0161738	0.208842
PRNP	ENSG00000171867.12	69.5773	58.7108	54.5221	66.6523	71.8744	88.0445	0.335098	0.0118747	0.19528
DUSP4	ENSG00000120875.4	34.8244	28.6211	32.7226	37.3561	34.5037	41.1965	0.272017	0.0112274	0.192551
AANAT	ENSG00000129673.5	0.0402	0.0565	0.0442	0.022	0	0	-1.87449	0.0142659	0.203899
FGL1	ENSG00000104760.12	0.04	0.0625	0	0.1462	0.0781	0.0992	1.93827	0.019139	0.218548
SPEF1	ENSG00000101222.8	1.3947	0.9433	0.8542	0.9776	0.6161	0.486	-0.76165	0.0274702	0.239006
TMEM30A	ENSG00000112697.11	21.4608	16.3849	12.0651	20.2795	21.9118	26.3433	0.442876	0.0135899	0.200688
HRAS	ENSG00000174775.12	35.1341	39.5544	39.4165	33.3668	33.597	28.7384	-0.324356	0.0147517	0.205127
USP12	ENSG00000152484.9	5.5884	4.4049	3.4308	5.5047	6.616	8.353	0.424235	0.017505	0.213074
OAS2	ENSG00000111335.8	0.0843	0.0856	0.0772	0.0693	0.0247	0.0224	-1.29113	0.0233673	0.229783
CDC42	ENSG00000070831.11	62.125	61.4863	58.6642	65.5676	70.0344	76.6929	0.243654	0.0115133	0.193537
LEPROT	ENSG00000213625.4	10.3975	8.577	7.5317	11.0215	11.1208	14.1482	0.350926	0.0152784	0.206509
PCMTD1	ENSG00000168300.9	0.6325	0.4405	0.2184	0.6868	0.7127	0.8515	0.694618	0.024262	0.232126
NTHL1	ENSG00000065057.3	19.511	22.4014	21.4984	19.325	18.9398	15.3484	-0.404542	0.0167661	0.21167
GYLTL1B	ENSG00000165905.12	0.8901	0.9936	1.2421	0.7745	0.6787	0.841	-0.62042	0.0257211	0.236346
IGFBP6	ENSG00000167779.3	39.195	41.9137	45.3012	36.785	38.1385	32.1855	-0.348165	0.0155161	0.207152
DDX3X	ENSG00000215301.5	20.6081	17.3859	12.2555	19.8457	20.8213	28.519	0.470805	0.0129128	0.197556
ABCD2	ENSG00000173208.3	0.1129	0.1654	0.093	0.2166	0.1901	0.3075	0.831493	0.028171	0.240879
ZNF692	ENSG00000171163.11	4.8903	4.5329	4.9803	4.196	4.2871	4.5911	-0.358975	0.018574	0.216949
DGKZ	ENSG00000149091.11	10.4545	11.2519	11.2741	9.4783	9.8004	8.546	-0.272503	0.013406	0.200201
GPRIN1	ENSG00000169258.6	11.5702	11.8092	12.2777	10.1184	11.2287	9.4091	-0.331113	0.0157382	0.207807
MAFK	ENSG00000198517.5	4.344	4.8322	4.9037	4.2756	4.349	3.5782	-0.425497	0.0183996	0.216853
ACTL6B	ENSG00000077080.5	3.003	2.3666	3.1177	2.4642	2.2015	2.3497	-0.494349	0.0225628	0.226737
ZNF770	ENSG00000198146.4	2.7351	2.2383	1.316	2.9721	3.3086	3.8273	0.486192	0.0194439	0.219756
TMEM184C	ENSG00000164168.3	6.6972	5.1761	4.5983	7.0968	7.1677	9.5801	0.378982	0.0169425	0.212308
SUPT16H	ENSG00000092201.5	17.2456	13.683	10.6048	17.4231	16.5413	22.7581	0.441507	0.0133531	0.199953
DDX58	ENSG00000107201.5	0.7497	0.7977	0.5276	0.8774	1.2533	1.5488	0.571789	0.0237696	0.230795
ARAP1	ENSG00000186635.10	9.4427	10.2042	9.9914	8.6407	8.9654	7.5802	-0.300595	0.0142659	0.203899
FKBP7	ENSG00000079150.13	7.445	8.3341	7.2232	9.5882	11.0326	12.4693	0.353702	0.0173405	0.212609
BRWD3	ENSG00000165288.10	0.5998	0.4909	0.2934	0.7755	0.589	1.0687	0.58897	0.0219503	0.225923
MCF2L	ENSG00000126217.16	0.3831	0.3255	0.3814	0.3702	0.24	0.3044	-0.50086	0.0218903	0.225923
C1orf86	ENSG00000162585.12	9.3145	10.4211	9.355	8.2346	8.8089	7.8081	-0.278859	0.013945	0.20215
CALCR	ENSG00000004948.9	0.0109	0.0205	0	0.0478	0.0511	0.0464	1.84171	0.0165222	0.210544
C19orf71	ENSG00000183397.5	0.5224	0.5511	0.4305	0.0716	0.2295	0.2776	-1.46004	0.0208609	0.225414
SHKBP1	ENSG00000160410.10	21.2795	21.8609	21.3436	19.9834	17.594	17.6371	-0.283397	0.0145057	0.204796
PEX6	ENSG00000124587.9	7.9497	7.973	7.5746	7.2264	7.3536	6.2969	-0.36333	0.017746	0.213182
DNASE1	ENSG00000213918.6	1.586	1.3699	1.4122	1.4133	1.1258	1.4241	-0.378863	0.0194015	0.219585
PNPLA3	ENSG00000100344.6	2.3695	2.5665	1.7807	2.0454	1.755	1.9395	-0.456341	0.0225459	0.226737
ADPRHL2	ENSG00000116863.10	30.5291	34.514	31.7209	29.0163	29.306	23.7259	-0.358975	0.0158364	0.207973
TGIF2	ENSG00000118707.5	5.6412	5.0604	6.3011	4.8331	5.0828	5.0685	-0.38428	0.0185899	0.216949
NT5M	ENSG00000205309.9	4.1297	4.3352	3.7734	4.1832	3.3657	2.791	-0.502519	0.022187	0.225923
OSR2	ENSG00000164920.5	0	0.0141	0	0.0165	0.0704	0.0479	1.99895	0.0151194	0.206187
USP8	ENSG00000138592.9	2.9229	2.5711	1.5298	3.0659	3.5656	4.4518	0.472823	0.0183986	0.216853
CD96	ENSG00000153283.8	0	0.0143	0	0.0167	0.0268	0.0325	2.00927	0.015569	0.207235
TEX22	ENSG00000226174.2	0.1862	0.1891	0.1875	0.068	0.0727	0.1319	-1.14923	0.0250899	0.235012
CDH23	ENSG00000107736.15	0.0101	0.0024	0	0.0222	0.0089	0.0135	1.94166	0.0180763	0.214699
TNFRSF25	ENSG00000215788.5	1.1009	1.0112	1.3085	0.8744	0.8554	1.0029	-0.535993	0.0248702	0.23443
CEP120	ENSG00000168944.11	1.4751	1.2673	0.9183	1.6491	1.8303	2.4251	0.446412	0.0213711	0.225923
SAMD9L	ENSG00000177409.7	0.9129	0.9891	0.4813	1.285	1.1346	1.6194	0.563679	0.0223952	0.225923
NMRAL1	ENSG00000153406.9	18.147	19.4163	18.8075	16.8434	16.2802	15.3243	-0.293711	0.0153001	0.206509
TBL3	ENSG00000183751.10	9.5682	10.5729	9.979	8.7397	9.1657	7.4503	-0.324516	0.0151512	0.206187
SPCS1	ENSG00000114902.9	43.1865	40.4233	37.4698	48.5014	49.8258	49.2335	0.253984	0.0138551	0.201347
FAM45A	ENSG00000119979.11	2.5503	2.2975	1.7663	3.0311	3.2557	3.6521	0.36183	0.0193519	0.219484
STARD10	ENSG00000214530.3	5.9198	5.6953	6.0227	5.7359	5.2537	4.4131	-0.414803	0.0187513	0.217098
MSI1	ENSG00000135097.2	4.5295	4.2203	5.1651	3.9041	4.2219	4.0723	-0.421378	0.020168	0.222357
DPY19L1	ENSG00000173852.9	14.1662	11.5954	10.3722	14.4221	14.5605	21.2877	0.419748	0.0146165	0.204898
TMEM229B	ENSG00000198133.4	0.4486	0.4659	0.455	0.3405	0.3639	0.3521	-0.553595	0.0270911	0.237871
HSDL1	ENSG00000103160.7	4.9028	3.7709	3.0041	5.4992	5.3337	6.916	0.394135	0.0191086	0.218481
FABP6	ENSG00000170231.11	0.4506	0.5282	0.4952	0.247	0.088	0.3991	-1.25477	0.025774	0.236424
TXNRD2	ENSG00000184470.15	3.7083	3.8659	3.9428	3.499	3.6333	2.7787	-0.411987	0.0180761	0.214699
TROVE2	ENSG00000116747.8	2.1373	1.8771	0.9618	2.3327	2.419	3.4383	0.547392	0.019086	0.218481
LACC1	ENSG00000179630.6	1.6541	1.2879	0.574	1.559	1.9492	3.1152	0.747838	0.0229075	0.227866
TP53BP1	ENSG00000067369.9	5.4251	4.0508	3.5495	5.9206	5.3354	7.0832	0.38023	0.0163255	0.209571
CREB1	ENSG00000118260.10	1.6291	1.515	1.0516	1.8349	2.065	2.6209	0.409994	0.0194345	0.219756
ESCO2	ENSG00000171320.10	0.5355	0.5642	0.3094	0.7323	0.7373	0.8625	0.546432	0.0245243	0.233386
C20orf27	ENSG00000101220.13	31.6563	33.9716	33.0238	27.9136	30.682	23.3022	-0.340286	0.0150765	0.206187
KCNK13	ENSG00000152315.4	0.7853	0.7527	0.4794	0.4592	0.4498	0.371	-0.735313	0.0293833	0.244287
SPATA17	ENSG00000162814.6	0.2297	0.2914	0.2004	0.4148	0.3403	0.4811	0.629606	0.0282696	0.241337
WDR62	ENSG00000075702.12	2.8141	2.7737	3.2012	2.6953	2.5373	2.4167	-0.370888	0.0181215	0.214994
PSD3	ENSG00000156011.12	2.0516	1.5655	1.0271	2.1637	2.0239	3.1155	0.502051	0.0178174	0.213562
RAB1B	ENSG00000174903.10	183.024	193.388	202.349	168.734	164.788	151.827	-0.216134	0.010919	0.192061
AHRR	ENSG00000063438.12	1.6738	1.5426	1.663	1.5146	1.3029	1.5841	-0.396518	0.0209256	0.225584
PODXL2	ENSG00000114631.10	24.7848	24.5609	24.0051	22.8248	21.7482	19.1095	-0.321703	0.0162459	0.209064
GNB2	ENSG00000172354.5	195.107	208.465	185.179	176.161	178.605	139.403	-0.263247	0.0100594	0.190305
RSPH4A	ENSG00000111834.8	0.155	0.0291	0.0681	0.2039	0.1452	0.2635	1.3346	0.0257792	0.236424
DENND1A	ENSG00000119522.11	5.0863	4.6364	5.542	4.1459	4.5911	4.4936	-0.309656	0.0163628	0.209634
TAS1R3	ENSG00000169962.4	0.0641	0.024	0.0423	0	0.015	0.0136	-1.81239	0.0169593	0.212308
TUBA4A	ENSG00000127824.9	4.6613	5.5645	5.6913	4.6492	4.7531	4.4038	-0.412847	0.0191867	0.218814
ATRIP	ENSG00000164053.13	5.3583	5.4469	5.6899	4.5896	5.2363	5.1338	-0.368028	0.0195997	0.220415
DHRS1	ENSG00000157379.9	3.194	2.8711	2.6396	2.8845	2.6596	2.2819	-0.410763	0.0205129	0.223655
CARF	ENSG00000138380.13	0.3577	0.34	0.2746	0.4406	0.5397	0.6355	0.513108	0.0259367	0.236674
CCNYL1	ENSG00000163249.5	3.9646	3.5771	3.1647	4.7157	4.8201	6.4498	0.362133	0.0191045	0.218481
SEPSECS	ENSG00000109618.7	0.4207	0.291	0.3335	0.5142	0.5576	0.6598	0.545766	0.0271908	0.238278
MAN1A2	ENSG00000198162.8	3.3008	3.1078	1.8861	3.599	3.8298	5.0277	0.449225	0.0176243	0.213074
SIRT7	ENSG00000187531.9	7.3545	7.1911	7.2405	6.4397	6.8813	5.4367	-0.354868	0.0169186	0.212308
RHOF	ENSG00000139725.3	2.4012	1.9375	2.4272	1.9374	2.2121	1.5979	-0.477181	0.0208447	0.225414
TTYH3	ENSG00000136295.10	138.716	140.234	143.664	126.946	127.046	112.28	-0.169498	0.00907773	0.186918
TYSND1	ENSG00000156521.9	5.3903	6.1584	5.1762	5.3114	4.9242	4.223	-0.40793	0.0187757	0.217098
MAP4	ENSG00000047849.17	38.8142	35.9758	42.7134	33.8309	32.7182	34.3314	-0.204649	0.0100396	0.190305
ENO2	ENSG00000111674.4	14.7017	14.6044	15.3758	13.5937	13.1047	11.4625	-0.314819	0.0159434	0.207973
FBXW9	ENSG00000132004.8	11.9921	12.728	11.256	11.4587	10.9274	8.9397	-0.405288	0.0188321	0.217098
ANAPC2	ENSG00000176248.7	11.3004	12.0229	11.7801	11.0025	10.2971	8.644	-0.351686	0.0164581	0.210316
LIG4	ENSG00000174405.9	1.4664	1.1786	0.7783	1.6952	1.5544	2.6613	0.553421	0.0237034	0.230604
TGFBR1	ENSG00000106799.8	2.3473	1.809	1.3073	2.4466	2.8554	3.1988	0.422537	0.0202882	0.222815
HNRNPR	ENSG00000125944.14	12.4033	9.927	8.2781	12.3806	12.249	17.0002	0.416767	0.0143796	0.204122
PARP3	ENSG00000041880.10	13.2579	13.7984	14.2879	11.8164	12.4859	12.2059	-0.314585	0.0173201	0.212609
ZNF184	ENSG00000096654.11	1.0855	0.8328	0.7281	1.1901	1.4369	1.7531	0.530753	0.0265104	0.236674
SIVA1	ENSG00000184990.8	6.4323	7.5348	5.5898	5.7287	6.154	4.8483	-0.410708	0.018229	0.215696
SOX4	ENSG00000124766.4	9.929	7.5495	8.1929	11.0344	10.6384	12.8843	0.322568	0.0165531	0.210661
ETNK1	ENSG00000139163.11	1.4615	1.184	0.8207	1.5965	1.8571	2.0217	0.431993	0.021315	0.225923
RBM8A	ENSG00000131795.8	22.6111	22.0045	20.8686	24.2377	25.6047	30.0223	0.282907	0.0138371	0.201347
EFEMP1	ENSG00000115380.14	23.6345	17.6489	16.3531	24.5365	23.036	27.1811	0.348377	0.0147304	0.205125
NBR1	ENSG00000188554.9	6.2801	4.7225	4.3174	6.765	6.1149	8.8904	0.401089	0.0164632	0.210316
H2AFZ	ENSG00000164032.7	54.4855	57.2883	43.156	57.5994	68.4679	65.8721	0.309858	0.0137579	0.201347
PCDHAC1	ENSG00000248383.3	0.1405	0.0555	0.0975	0.1622	0.1647	0.2437	0.911037	0.0306	0.247283
RNF20	ENSG00000155827.7	7.5075	5.9131	4.1867	7.7166	8.0589	9.7547	0.409541	0.0178494	0.213754
CKB	ENSG00000166165.8	59.7114	61.5546	61.846	54.3472	52.8387	43.7817	-0.274182	0.0135042	0.200201
ATG2B	ENSG00000066739.7	1.3977	0.9926	0.5854	1.411	1.4105	2.1952	0.573753	0.0203479	0.223095
KLF13	ENSG00000169926.5	5.7437	4.9964	5.4332	4.8928	4.8142	4.5091	-0.308135	0.0170411	0.212308
GLIS2	ENSG00000126603.4	6.1257	5.7345	6.1253	5.5823	5.5267	4.815	-0.366393	0.0188084	0.217098
C1orf56	ENSG00000143443.9	8.0246	7.6659	7.4486	7.1212	6.9681	7.2245	-0.346942	0.0201061	0.222204
ZNF276	ENSG00000158805.7	4.7527	4.523	4.8253	4.3531	4.1379	4.0247	-0.325187	0.0179433	0.214553
DLGAP3	ENSG00000116544.7	1.3391	1.2245	1.1188	1.2012	0.9335	0.9527	-0.487134	0.0257114	0.236346
PDIA2	ENSG00000185615.11	0.0979	0.1469	0.2367	0.0429	0.0918	0.0208	-1.57956	0.0229777	0.227914
VPS51	ENSG00000149823.3	20.1928	23.1299	20.7714	19.3888	18.6043	15.3819	-0.320426	0.0147996	0.205414
PPP2R5C	ENSG00000078304.15	4.3184	4.2022	3.2324	4.8393	4.8608	5.9124	0.333462	0.0158923	0.207973
PPP1CC	ENSG00000186298.7	12.2116	10.0869	8.8081	12.2489	12.8199	16.0222	0.354376	0.0152022	0.206228
ZNF709	ENSG00000242852.2	0.0848	0.1229	0.1186	0.1606	0.2168	0.2704	0.858927	0.0309896	0.24826
ZNF709	ENSG00000196826.7	0.1075	0.1557	0.1503	0.2035	0.2747	0.3427	0.858927	0.0309896	0.24826
SDF2L1	ENSG00000128228.4	19.0628	21.5917	19.5833	30.1206	34.016	26.1774	0.400881	0.0186421	0.216949
UBBP4	ENSG00000263563.1	1.0504	1.2558	0.7214	0.7486	0.5538	0.614	-0.74813	0.0307078	0.247408
BACH2	ENSG00000112182.10	0.2474	0.1813	0.1285	0.2959	0.2529	0.4302	0.65745	0.0288403	0.243383
GAMT	ENSG00000130005.7	56.4394	60.3482	53.6483	49.1978	52.6014	42.0175	-0.30639	0.0149787	0.206093
ABCD1	ENSG00000101986.8	12.2067	12.9567	12.7966	11.4566	11.4626	9.9127	-0.32286	0.0167523	0.21167
PIK3CA	ENSG00000121879.3	0.7389	0.7499	0.4265	0.9076	1.0575	1.1482	0.488683	0.0234531	0.229804
CLCN3	ENSG00000109572.9	5.8593	4.9695	3.1387	5.9894	6.2538	8.8883	0.487436	0.0170218	0.212308
CAPN1	ENSG00000014216.11	32.4224	32.5372	33.2524	28.6217	29.028	23.473	-0.253861	0.0125179	0.197317
SOD3	ENSG00000109610.5	74.9125	85.0772	83.3873	66.9847	73.4685	61.0894	-0.265894	0.0135002	0.200201
OPN4	ENSG00000122375.7	0.0179	0.0504	0.0591	0.0196	0	0	-1.90193	0.0172468	0.212577
SCAMP4	ENSG00000227500.5	10.0239	9.7918	9.7803	8.7628	9.1034	7.3883	-0.314855	0.0161106	0.208294
STXBP6	ENSG00000168952.11	0.0273	0.0102	0.036	0	0.0064	0.0116	-1.87903	0.0192968	0.219267
[truncated: 14,252 more rows]
